# Supplementary material for: pQEB1: a hospital outbreak plasmid lineage carrying blaKPC-2
Source: PubMed Central journal article supplement (PMC11368168; doi:10.1099/mgen.0.001291), 2024-09-02
Supplement: mgen-10-01291-s001.pdf [file mgen-10-01291-s001.pdf]

## pQEB1

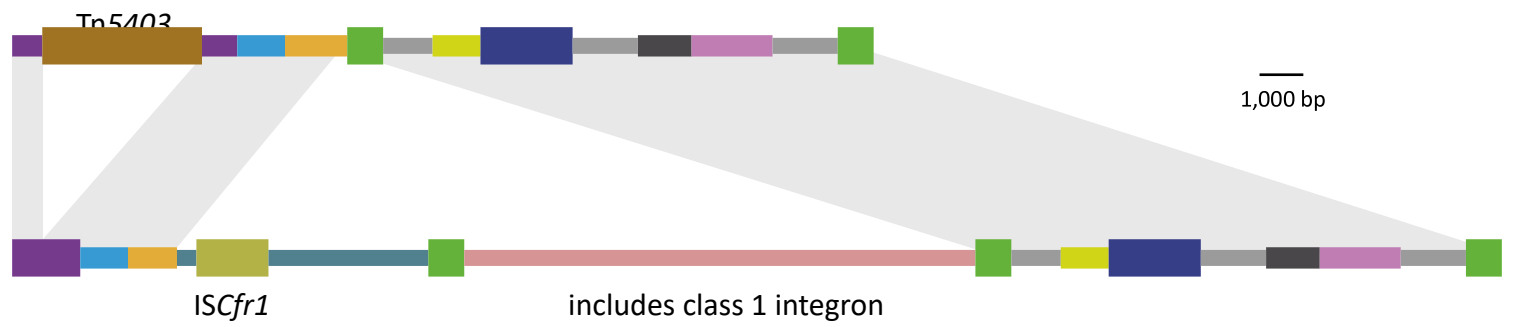

## pKP37361-KPC2

**Figure S1:** Structural variation in the resistance regions of pQEB1 and pKP37361-KPC2 (GenBank accession CP014944). Shared sequences (>99.5% identity) are indicated by grey shading linking the lines that represent each resistance region. Elements unique to each region are labelled. Colours here correspond to those used in Figure 1.

**Table S1:** pQEB1 variant sequences in the GenBank non-redundant nucleotide database

| pQEB1 variant       | GenBank accession | Note(s)                                                                                                                                           |
|---------------------|-------------------|---------------------------------------------------------------------------------------------------------------------------------------------------|
| pQEB1               | PQ162285          | Baseline structure reference.                                                                                                                     |
| pQEB1_ISKpn26       | PQ162286          | Acquired ISKpn26 and 4 bp TSD.                                                                                                                    |
| pQEB1_merTn::IS4321 | PQ162287          | Acquired putative mercury resistance transposon and 5 bp TSD. A copy of IS4321 is inserted in the terminal inverted repeat of the transposon.     |
| pQEB1_Tn::IS5       | PQ162288          | Acquired an unnamed transposon and 5 bp TSD. The transposon is itself interrupted by IS5 and a 4 bp TSD.                                          |
| pQEB1_inv1          | PQ162289          | IS26-mediated inversion event 1.                                                                                                                  |
| pQEB1_inv1_IS5708   | PQ162290          | Acquired IS5708 after IS26-mediated inversion event 1.                                                                                            |
| pQEB1_inv1_arsTn    | PQ162291          | Acquired putative arsenic resistance transposon and 5 bp TSD after IS26-mediated inversion event 1.                                               |
| pQEB1_inv1_inv2     | PQ162292          | IS26-mediated inversion event 2, after IS26-mediated inversion event 1.                                                                           |
| pQEB1_inv3_Tn5403   | PQ162293          | IS26-mediated inversion event 3, and acquired a second copy of Tn5403, which has interrupted the backbone conjugative transfer gene <i>traN</i> . |

\*TSD = target site duplication

Supplementary File 1:

>pQE1

GGAATTGGCCACCTTAGACGAAACTGTAAAAAATGTATTTACTTGTGGTGGAGAGTAATTTTAAACC  
CACAAAGGCAAGGCGCATGGATAAGTTGCTGAACAAAAAGATAAAAGTTAAGCAGTCTAACGAGCTTACCGAAGCTGCTTAC  
TACCTCTCGCTAAAAGCAAAGCGCGTTCTCTGGTTATGTCTTATGCAGACGTATTTACAGCTTCAGTAAGCGAAGATGATGAT  
GAGATGGCTGTACTCGGTGACTCTACTTTCAAAGTAAAGGTGGCTGACTATCAGCAAATTTTTCAGGTAAGCCGTAACCAGGC  
TATCAAGGATGTTAAAGAAGGCGTGTGGAGTTAAGCCGTTCTGCGGTAATCTTTTACCCGAAAGAGGGGGCGTTTTGACTGC  
GTCGCGCGCCCCTGGCTAACAGAGGCTGGCAGCCGATCAGCTCGTGGTATCTGGGAAATCGAATTTAACATAAACTCCTGC  
GGTACATTTACGGCCTGACGAACCAGTTCACCACCTACTCGCTCCGCGATTGTGGCAGTCTTCGAAATCCCCGGACGATCCGC  
CTTTATGAAAGTCTTGCTCAATTCAAATCTTCAGGCTTATGGGTTACTACTCATGCTTGGTTAAATGACCGTTTCCTTTTGCCGG  
AATCCCAACAGAAGAACTTGGCAGAGTTGAAACGATCTTTCCTTGATCCTGCACTCAAGCAGATAAATGAGAAAACACCTTTA  
CTTGCTAAGTATAGTATTGATGATTCAGGAAAATTTCTGTTCTCAATAATTGATAAGCAAATCCCGTCTGACATAAATCAGCAC  
ACATGAGCCTGTCAATTTGACAAATTTTGTGATGAAGATGGGCGAATTTCCACACAGCACCCGGCGCCCGCAAGATGGGCGG  
ATTCCACACGACAGCGGCGCCCGCAAGATGGGCGGATTTCCACACTACAGCGGCGCCCGCAAGATGGGCGGATTTCCA  
CACGGCAGCGGCGCCCGCAAGGTGGGCGGATTTCCACACGGCAGCGGCGCCCGCAAGGTGGGCGGATTCTCACGCGG  
CAGCGGCGCCCGCAAGATGGGCGGATTTCCACACGGCAGCGGCGCCCGCAAGGTGGGCGGATTCTCACGCGGCAGCG  
GCGCCCGCAAGGTGGGCCGATTCCACGCGGCAGCGGCGCCCGCAAGGTGGGCCGATTCCCACGCGGCAGCGGCGCC  
CGGCAAGGTGGGCCGATTCCCACGCGGCAGCGGCGCCCGTAAGGTGGGCGGATTTCCACACGGCTGCCGCGCCCGCAA  
GGTGGGCGGATTTCCACACGGCAGCGGCGCCCGCAAGGTGGGCGGATTCTCACGCGGCAGCGGCGCCCGCAAGATGG  
GCGGATTTCCACACGGCAGCGGCGCCCGCAAGGTGGGCGGATTCTCACGCGGCAGCGGCGCCCGCAAGATGGGCGGA  
TTTCCACACGGCAGCGGCGCCCGCAAGGTGGGCGGATTCCACACGGCAGCCTCGCCCGCAAGGTGGGCGGATTCCCA  
CACGGCAGCCTCGCCCGCAAGGTGGGCCGATTCCCACGCGGCAGCCTCGCCCGCAAGGTGGGCGGATTCCCACACGGC  
ACCGGCGTGCGGCAAGGTGGGCGGATTCCCACACGGCACCGGCGCGGGCAAGGTGGGCCGATTCCCACACGGCACCGG  
CGCCCGCAAGGTGGGCCGATTCCCACACGGCAGCCGCGCCCGCAAGGTGGGCCGATTCCCACGCGGCAGCCTCGCCCG  
GCAAGGTGGGCCGATTCCCACGCGGCAGCCTCGCCCGCAAGGTGGGCCGATTCCCACACGGCAGCGGCGCCCGCAAGG  
TGGGCGGATTTCCACACGGCAGCGGCGGGGCCAGTGGGATTAGGAGAATAGGTGTTTTACCGAATGCCCTGACGAGG  
CGTAAAAAACCCTTGGCGGCGCCTCATAAAGCAGAAAACCCGCTCAAGGCGGGTTATCTGCTCTGTAGCCTGTGATGCT  
TCGCGGGCATCCGGCATAACAGCGAGGTGAAATCTTCTTTTGGCATGTTAATTATACGTCTAACGCGGCATATGATCAAACCTG  
TATTAATAAGCCACTGTACCGTTTATAATGCTCTCAGATCAAAGAGGTAAAGCCCGTTTAGCCGCTGTGTGATGAGCCAGTT  
CAGACTCTTCAAATCGAATTTGGTACTAAACAGGACCCGAACCGTGGGCAAGCACACGGCAACGGTATAGCCCTCTTCCGG  
TTTCGCACCCGGAAGCCTGGGCGGCAGCGTGGTAAATCTTCTTTTGGTTAAGTGAATGGCATAACCGGATGGGCGGATTA  
GAGGAAAGGGGATTGCCTAGTAACCTACGCGCCACAGAGATGGAGGTGCGGGGAATGATTGAGCTGATTATCGCTATTCTGA  
CCTAATTGCGGCTGTATTGCAGTTGATCAACTGGTTCCTTAATGGTGCCGGAGTCTGTGAAGGTGAAAGCCTGAACGGGC  
AAAACCTGAAAGGTTTATAGCCGTCCTTCGGGGCGGCTTTTTTTTCGGCAAATAGGGTTTTACCGAATAATGCAGAGTTTTAA  
GGTGAGAATTTGCAGACTTGGCGTTTTACCGAACATAGATACTCCCTAGGCTGATAGGTGCATTAGTTATACCCTACCTGAAC  
ATATTGTAAAAGATGTCAGTCTCCAGTGACTTGTGTACTATCAACTGACAAGACTCTTACACGCAACGCAGGGGGATGGAGTT  
TTATGCTTAGAAAAATAATCAGGGGTAGCGGATTAAGTCAAGTCAAGAAAAAACTGATAGAGTTGCTGATGATGCTTTTTTT  
GGTCTTTGGTCTTATCCTAATGTTTATAGCGATGAGGGTACTCTAAAAATAAAATTGGGAAAGAAGTTAGTGACTTATTAGTTA  
TTTTTGATAAAGATATAATAATTTTTTCGATAAAGCTATTACATACAATAAAAAACAAAGATCCTAAGGTTGCATGGCAGAGATG  
GTTTAAAAAATCAGTCATACAGTCTTGACACAGTTATTTGGCGCAGAGAAGTTTATAAAAGATCATCCCGAAAGACTTTTTGT  
TGACAAAGAATGCTCAGTTAACCTCCCATTAATAAGATAATTCTTTAATTTTCATTTGGTGGCCGTCATAATAATTTTCAG  
ATCCGGCGATCTCGTACTTTGACAAAATAGAAAAAGGCAGCTCTGCTACTTTAGTTAACATATTTCTTTAAACGCCCATCAATG  
TCTAGAAAATCCATTTTGTGTCGGAGACGTTTATCCTGATAAGACTTTTGTCCATATACTTGTGAGACTGCCCTAAAACACTG

TTAACCGAGTTAAACACAGCAACTGATTTTCATTGGCTACCTTAACGAAAAAGAGAGGGTTGTAAGAGAAAGAACATTATTGG  
TCAGCGCTGGGGAAGAAGAGACTCTTGCTGCTTACATTATGGGTGATAAAACCATAATATCAAAAGAAATTATTGGAAACGAT  
CAAGGGATGACCATACCGGAAGGTGAATGGAAAACTATAAAACCACTTTCAATTATCAATATCAGCTCTCAATGAAAAAGG  
TAGCGTTTTCTGGGATAACCTAATCCACAACCTTCTCGACAAGTATATTGTCAGCTAACGTTGGTTTTTTTAGTGAAATTGAATTT  
TCTACACATGAATTAGGTGTTAGAGAATTAGCCAAAGAAAGTAGGCAATCTAGATATTACCTTTCAAAGAACTTTAAAGAGAA  
ATAAAAACAACCTCAGCCTCATCTAAGAACGTCAAGAATGGTCAATCAATCGATGAGCCTGGAAAGTTTTACTTATTCTTTTT  
TTTTCTAACGATAGCAAGTTGAGTTACTCTGATTACAGAATCAACGTATATCTTATATAAATGCTTATGCTGAGGTTGCCTTTA  
ATAAATACAGACATATTAATAAATAATTACTATTGCAACAGAGCCGCAAATAACAGAAGGAAGATCTGAAGACCTAATATATA  
GCATATCCCCAGAGAAATTTACCAAAGAGCAAATGAAAAAGCCAAAAGATTATCAAGAGAATACAAAATACTAAGTGATTTT  
TTACCTACTAAAACGACAAAGAGCGATAACTTTAAATCAGTTATATCAAAAGGTGAAAAAATAGGGCGGAATACACCTTGTCC  
ATGTGGCTCCGGTGTAAATTTAAAAAGTGCCATGGTGCGAATAATTAGCATTATTGTATGTATAACGGTAATGGCGCGGCAGA  
GAAACCGGCGCGTTCTGCCCTAGTGTGGCCTGCGGGTTCCCCGACCCGCTGTATGTAGTATCGGCAGCATCTGAGAAAA  
CCACTACATGTAGTTATCAGCGCCACAACGGCGCGGGGACGAGTGCGGTTCGGAAAAATTGGGGTTTTACCGAATCCGGCA  
AAAGATTGCTTCTATAACGTCCGCTTCTGGCACACAGCAGCCGTTAAGATGTAAGGCCTTACGCCAACTAAATCTAATGGGA  
CAGATTTAGTTGGTGATGGTCAAGTAATCTGCAAACGGTCACCAAGTAAAATGCAAATGGGTAGTCAAGTCCGATGCAATTAC  
GCACCCGGAAGGTGGGCCGATTCCACACGACAGCAGCGCCCGCAAGGTGGGCGGATTTCCACACGGCAGCGGCGCC  
GGCAAGGTGGCCTATTCCACACGGCAGCGGCGCCCGGCAAGGAGGGCCGATTCCACACAGCACCGGCGCGCGGCAA  
GGTGGGCCGATTCCACACGACAGCAGCGCCCGCAAGGTGGGCGGATTTCCACACAGCACCGGCGCCCGGCAAGGTGG  
GCCGATTCCACACGGCAGCGGCGCCCGGCAAGGTGGGCGGATTCCACACGGCAGCGGCGCCCGGCAAGATGGGCGGAT  
TTCCACACAGCACCGGCGCCCGGCAAGGTGGGCGGATTCCACACGGCAGCGGCGCCCGGCAAGGTGGGCGGATTCCAC  
ACGGCAGCGGCGCCCGGCAAGATGGGCGGATTCCACACGGCAGCGGCGCCCGGCAAGATGGGCGGATTTCACACGGCA  
GCGGCGCCCGGCAAGATGGGCGGATTCCACACGGCAGCGGCGCCCGGCAAGATGGGCGGATTTCACACGGCAGCGGC  
GCCCGGCAAGGTGGGCGGATTCCACACGACAGCGGCGCCCGGCAAGGTGGGCGGATTCCACACGACAGCGGCGCCCGG  
CAAGATGGGCGGATTCCCATATCGACATGTATGTAGCTTGTGTTATCCGTGGATTGTGCAGCTCAGCGGGTCTGTTGTCGTATG  
GCGTAGTGTCCCCGTAACCGGCCGCGTGCGGCCGCTAACGCGCAGTACGGCGCCGCGACCCGAAGGCGGGCCGCGTTCC  
CGCGCGCAGGCGCGGCGCCACTGCGCACCCCCGTGGGGGACGTGCGGCAGCTGTGTGGCGGTGAGCGGGATTAGGG  
CTTTGCAGGGAGGGGGCTGGGTGCGGGGATAACGTTTCAGCATTGCGGTTTCCGGCGATTGCGGCGGGTGCCTTTAACTC  
CGGCGTGGTCTGCTTCCATGCCCTGACGGCATAAGAAAATAAAACCGCCATGCTGCGGTTCATTATGATTTTGTGGTGTAGCG  
ATAAATAGTCATGCGAGAAACGTTGAAGCGCTTAGCAACTGCACCAACTGTCATTTAGGATCAGCAAGTAAGATTCTAATTT  
GTTTAAACATCTTCTCAGAAAGTGACGGTTTTCTCCCTCCACACGGCCCTTGCGCGTGCAGCTGCAAGGCCTGAGCGCGTT  
CTTTCAATATTGCGTTGCGTTCAAAGCTAGAGAATATCGCCATCAGATGAGTATAGATTTCCCCTATAACTGGCGCATTGTGT  
CTATTCTGCTTGGTATGAAAGTTATTCCGCGTTTTCTCAGGTCGTGAGTAAAGTAATGACTTGACCCAATGAACCAC  
CGAGCCGATCTAGTGCCAACTACTAGGGTATCTCCCTCGCGCAATGCTTTAGGCAGTTCTCCAGTTCCAGCGCACCTTTTT  
TGTCGCGCTTTGGGCGCTACGTGAGGTCTGATCCTGATAGATTTGCTCACATCCAGCTTTTGTAGTTCTGCAACCTGGTGCG  
CCACATCCTGAAGATGCGTAGATTTACGTGCATAGCCGATTTTCAATCTTTCTCGCTAATTAGTTATGGGGTTATTGTTATGTTG  
ATACAGTAACGAGTTTTGTTACATGAGGGGAGTCATTTTTCGGGAGAAGTCAGGACTTTTCAAGACTGTCACAAAAACCATC  
GTTTTTGATACATTAATTTAACCAATAGGTTGCAGATCAAATCGTCTGTAACAGCCTTTCTGGCTGTTTGTATATAATCATGAAAA  
AATGGTGAGTAGAGTTTCAGGGTAACAGGGGATGCTTATGTGCGTTTTCCACAACCTGGCTACTTGAGATCGCATGTGAGAATT  
ACTTCGTCTACATCAAACGCCTTTCCGCCAACGATACCGGCGCAACAGGTGGTACCAGGTAGGGCTTTATATCCCTCAGGT  
ATCGTTGAAAACTCTTTCCGTCTATCAACCATACCCGTGAACCTGAACTGAACTTCCGTTTTTCTCACCGCACATGTGTCATCGCATG  
ATTGCCCTGACAGCGAAGCCCGGGCAATTTATTATAACAGCCGTCATTTGGTAAAACCCGGAATGAAAAAAGGATTACCCGC  
TGGGGTAGAGGCAGCCACTTCAGAATCCTGAAAATACAGGGGCTCTGACGCTCCTGGCTTTCAAGCTTGATGAGCAAGGG  
GGGGACTGTAAGGAAGTAAATATTTGGGTATGCGCCAGCACTGATGAAGAGGACGTCATTGAGACCGCTATTGGTGAAGTTA  
TACCCGGAGCGCTTATATCCGGCCCCGAGGACAGATTCTAGGCGGACTATCTCTACAGCAAGCGCCAGTAAATCATAAATATA  
TTCTACCTGAAGACTGGCACCTGCGCTTTCCGTCGGGAAGTGAATTTAGTATGCAGCCAGCCATTATGTGAAAAATCCC  
TTGATCCGGATGAGCAACTTCTGACCGCCGCGCGTGGAGTACGACATATTTCTATTGGTTGAGGAACTGCATGTTCTGGAT

ATCATCCGAAAGGATTTGGCTCTGTGGATGAATTTATTGCGCTGGCCAATTCTGTCAGCAATCGCCGTAAATCCAGAGCCGG  
GAAGTCTCTGAACTGCACCTGGAGCATCTATTCATTGAGCACGGCCTGCGACACTTTGCGACGCAGGCCATCACAGAAGGT  
AATAAAAAACCCGATTTCCCTTTCCCTTCCGACAGGGGCTTACCACGATACTGAGTTTCCCGTAGAAAATCTGCGCATGCTGGCA  
GTCAAGACTACCTGTAAGGATCGCTGGCGTCAGATACTGAATGAGGCCGATAAAATTCATCAGGTGCATCTGTTTACTCTCA  
AGAGGGAGTTTCTCTGGCTCAATATCGGGAGATGCGGGAGTCGGGTGTCAGATTGGTCGTGCCATCATCGCTGCACAAAAA  
TACCCGGAGGCGGTGAGAGCTGAGCTAATGACGCTAGGTGCGTTTATTGCTGAGCTGACAGGGCTTTACGCAGATATTCCAT  
AGATTATCTCCCGCATAAATACCGGGAGGAGCGATCAGATTTCGTTCAACCTTGCACGAATCGGCATTAACCGCTTTCAGGAT  
ATAAGGTTCAAGCAGTTTGGCTACGGCTTCAAACACGGGCACCACTACGGAGTTACCGAACTGCCTGTACGACTGAGTGTCT  
GACACAGGAATGCGAAAAGGCCTGCCATCTACTTTTTCAAACCCATAAGGCGCGCGCACTCTCGTGGAGTCAGCCTGCGGG  
GCCGATGCGCCTGATTTTCTTCGTTTCGCGAAGTCTGTTTACCTGTGGCCATATCCAGCCACGGTCTATCAGAATTCAGACC  
CGTCTTTGTGATAGCGAGCAGAAAGCGTACGGGCAATGCTTTCTTTATTTTTCAGGATTAACGAGGCCAAAACCGAATCCGTTA  
CCCTTAGCTGCGTGCTTTTTGGCGTAGTTATAGAGATACTCCAGAGTTTCGGCGTCAGTATATATTTGCTGTCAACCACGGGT  
TCCAGCAGTTCGCCAAATGACGGACGCTGTTCCGGATAAAAACGACTAATATCGCGCAGGGTAAAGCCCTGGTGAATGTTCA  
GATCACGACGAAACCGACCAAAAACGATACGTTCTCGGTGCTGAGGTAAGGAGTGTCTTCCGTCGATAACTTTAGGATCGTTT  
TTGCCATCTCAGCTGCATCCGCAACTTCATAGCCCAGTTCGTCGAGGGTATCCATGATGACTTTAAAGGTTTTACCCTGTGCAT  
GGCTCTTCAGGTTTTTAACGTTTTCAAGAACAAGATGGCAGGTTTTTTTTCGCGTATAATACGCGCCACATCGAAGAAAAGC  
GTTCCCTGAGCCTCACATTCGAAACCATGCGCGCGCCGAGCGAGTTTTTTCTTGCTTACGCCCGCAAGGCTGAACGGTTGAC  
AGGGGAAACCTGCTAGAAGTACATCATGATCCGGCACATGCTCATTAAATGTAAGCATAGGCATCGTTTTCAGGACTTCAGGTT  
TATCACTGAGCGTGACTTCCCGAATATCGAGATTGAAAGTGTGTTCTGAGCATCGTTAAACCAGTTAGCTTTATATGTGCGCA  
CAGCCTCTTTATTCCATTCAGTAAACGCACTGGCCACCGATGGTTTTCGAAGCCCTTCCGTATACCTCCAATCCAGCAA  
ACAGGTCAATAAACCGGAAGGCATAGTCAGGGTGATGTGCAGGCGCTTCCGGAAGCATTTCGTAGAAGTTCTCTTCGGC  
TAACGTGAGCGTCTTAGGTGAGCACTTACCATTAATCCAGCGATTAAGAGTCTCGCGACTCCACTCATTTTTACCAACTTTTCTA  
AGCAGTTCAGCCACGTAATCTGGTCATAGATTTCCAGCACCTGCCGAGCAGTTTTTTATAATTTTCTGTGCGAGTTGTTCTT  
CCGCTTCTGCTTTCTCAAGCAGATCCTGCGCCAGTAATTCAAATTCAGACATATTGCCTCCATTGGGTCTTATGGGTGAAACTG  
TATCACTCATTTGACCCAGATTGAATGTTTTTATCTGGATATTTAAACAGGTTTATTGTTAGGTAACGCACGTTGGCCACGCTGG  
AGCGTCTTCTGGGCCTGCTGTGCGCCTTTGAGGTGCTGGTATGGATGACGGATGGCTGGCCGCTGTATGAATCCCGCCTGAA  
GGGAAAGCTGCACGTTATCAGCAAGCGTTACTCAGCGCATTGAGCGACATAACCTGAATCTGAGACAACATCTGGCAAGG  
CTGGGACGGAAGTCACTGTCGTTCTCAAATCGGTGGAGCTGCATGACAAGGTCATCGGGCATTATCTGAACATAAAAACACTA  
TCAGTAAGTTGGAGTCATTACCGGTTCTCTTTGTCTTTTAGTGATTCTATAAACCTCATTACGCTGAATATAAAAATCTATTATT  
GATTTATGTGGCTCATGAGGTTGTGGGATGGTCTTGTTTTGAATGTGCCAGTTTTCTTAATGGCAAAGATTAATTCACCTTCT  
GTTATTCCTAACATTTAGCAAATGTTTTTGTCTCTATAGTTACTGACTTCATTTAATTAACCTCTCATGGTATCGATTTTCTTACC  
GGCATCTTTAACAATGGTGCTCGTTTCTAGTGTTGCTGCGGTACGCTTCATCATCGTCTGCGGGGCGGTTGCGATAGTGAAGG  
AGCTGCCGGGCGTGAGCAAATCTATCAGGCGCTGGCCGCTGATAATCTCCATCCGTTCACTGGCAATACTGACAGATTTTGAA  
CCTGCGCCGTTTTCCCGGTATGGCAAACAGACCCGCGACAGTTATGACGTTTAAAGCAACTTCTCGAACTCCTGTACGTGCTG  
TAAAGCAATATGGCCGCGATAGCGTTTAGCCTGAATAAGATAGCGATATTTTCTATTATTACCTGGCCGTCAATGCCTCCATCG  
CCGGTATAGCGTTTGTCTGATGGTTCTGAAGCCATGCGCGGCTTTGTTGAATAAATCGAACTTTTGCTGAGTTGAAGGATC  
AGATCACGCATCTTCCCGACAACGCAGACCGTTCCGTGGCAAAGCAAAGTTCAAATCACCAACTGGCCACCTACAATAA  
AGCCCTCATCAACCGTGGCTCCATAACTTTCTGGCTGGATGATGAAGCTATTCAGGCCTGGTATGAGTCGGCAACGCCTTCATC  
ACGGGGAAGACCTCAGCGCTATTCTGATCTCGCCATCACCACCGTTCTGGTCATTAACGCGTGTTCAGGCTGACCCTGCGGG  
CTGCACAGGGTTTTATTGATTCCATTTTTACTGATGAATGTTCCGTTGCGCTGCCGGATTACACCAGTGTGAGCAAGCGCG  
CAAAGTCGGTTAATGTGAGTTTCAAACGTTACCCGGGGTGAAATCGCGCATCTGGTGATTGATTCCACCGGGCTGAAGGT  
CTTTGGTGAAGGCGAATGGAAAAGTCAAAAAACACGGCAAAGAACGCCGTGATATGGCGAAAGTTGCATCTGGCCGTTGA  
CAGCAACACACATGAAATCATCTGTGACAGACCTGTCGCTGAACAATGTGACGGACTCAGAAGCCTTCCCGGGTCTTATCCGGC  
AGACTCACAGAAAAATCAGGGCAGCATCGGCAGACGCGCTTACGACACCCGGCTCTGTACGATGAACTGCGGCGTAAGA  
AAATCAGCGCGCTTATCCCTCCCCGAAAAGGTGCGGGTTACTGGCCGGTGAATATGCAGACCGTAACCGTGCAGTGGCTAA  
TCAGCGAATGACCGGGAGTAATGCGCGGTGAAATGGACAACAGATTACAACCGTCGCTCGATAGCGGAAACGGCGATGTA

CCGGGTAAAACAGCTGTTCGGGGGTTCACTGACGCTGCGTGACTACGATGGTCAGGTTGCGGAGGCTATGGCCCTGGTACG  
AGCGCTGAACAAAATGACGAAAGCAGGTATGCCTGAAAGCGTGCGTATTGCCTGAAAACACAACCCGCTACGGGGGAGACT  
TACCCGAAATCTGATTTATTCAACAAAGCCGCCATGCGCTTCAAATCCTTCCAGCAACAGTTCTTCAAACACAAAAGGATCAAT  
TTTCTCAGGTAGTTAATTTTTGTGGGAAGCCCGGCAACGTCTTTATGCGCTCCAGCACCCGCCGCGCACTTTGCTGCTTCT  
TTTGTGTCGTCGGTTGCGTACTGAACGCCGGAAGAATACAACGGCAAACAGTGCGATGGCGCTGCAAGCCCATAGAATAAGG  
TTTTCTGTAGTGGGGAAGGGGAACATGGTGATAGTGTGCTTTCTGTGGGTAAAGAAAAGGGCGGTTAAACCGCCCTGGTGT  
TTAGCGACGGCTGTAAACCTGCCACGAAGCGCTGCCTGACTGATTTTGGCAAATCCGCCCGTAAAGTACGGTGCCGGTCGAG  
TAGCGGGCGCCATTAGATAGCAATAGCCGCTGGATTGCAGCAGTTCGTTGCGCAGCTTTTCTTCTGCTTTGATAGCCGGGA  
CTCCGCAGACTGCAAACGAACGGATAATTCGTTAATCTGGCGTTGCTGGTTATTCATCTGGCTCTGCATCGCATTACCTTTATCT  
TGGCTGACGCAACCAGTTAAGAGAGCTGTACAGGCTAATGCACTTAATATAATTTTTTACGTTGGCTCCTTAAATTGAGATT  
ATTCCTAGCCCGCTATAAGCGAACTTTCCCGTATTTACTTATGATCTGGCTTATCATCGACTGGTTACTTCCACCTTCGCCATTAT  
CCGGGCATTCATTAAGAAAAGCCTTCTGCGATCCCTCGTGTGGTTGGGTAAAAGCCGTGCTTGTCTTTTTAACGATATTGA  
AGAAAGCAGCTTCAGCACTGTTACTCTGCTTCCGCCGCTATCGCCGGTGAGCTTGCCCGCCATGCACATAATAACTTTGCAG  
GGATCTTCAGCATGGCTGGCAGGAAGATAAAGCAGACTACCAGCTGCTATCAGAGGGATTAAGAGTTTCTTCATTGTTTTGTC  
CTAACAGTTTGTTCAGATATACACCCGCCAGAATGTTGATAACGGTAAGTAATATAATAAACGCAGAGTTATAAATAGATTT  
GTAACCTATATCGCCTGCGATATATCGACAATAAAAACGAAAATCGTTAACATTGCGAACAACCTTAATAACTTTCTGTAATTT  
TCTAACGATATAAGCAACTGAATAAGAGCCGGATTTGATGATGCTGCGGAGTAACCTGATAGCATGGACTCGGAATTTCTTA  
AAATGGGCGGAATGGAAAATGCCTTTTTCTTCTTCTGCCTTTTTGCTTTTCCGAAAATCAATAACATCGCCATTTTTATACT  
CTCCGGTTATATCTTTAGATCATCAAGTGATAAACCCTATCAAGCAGCTCTTTGAGCCATGTTGGTTCGGCGGCCAGTCCCGGA  
CCAGGTATTTCTGCGTTCCTGGGGTCGCGGTATTTTACTTGTCTATGTTCTCTGGGGTTGGCAACGCCCTGCATTTTCATGGC  
TTCCAGGCTAATGCCAGCGTCCAATTTTGCAGTTAGCCAGGCCGGGCGCTTCCCTATACCAGTCCACGTATTAAGGGTTATC  
CGGGTCACGATACATGGGTTACCTTTGGGGCGTTTTTCTGATTTACAGGGGAACCAGCATTACCTTCTTCTTCAGAGGTTT  
TCTTTTCGTTTCTTCTTGACACGATCTCATTAGCCCTTATCATAAACATAAGTCGTCGAAATTACAATTACGCGGTGAAACGTAA  
ATGAGTAAACATCCAAAACCTTCTGGTTCTCGCTCTGGCCTGCCTTGCTTGTGCTGGCCGTGCCAGTGCTGCGCCTGCCTCAGA  
TGAAGTTGCCAGGCTTGCGCAGAGATGTGCGCCTGATGTTTACCCTTAACAATGGCGTACATCGTCGGCCATGAGTCCTCAA  
ATGGGCCGTACAGGATCAATATTAACGGTGGTAGTACCCAGTTAAAACAGCAACCACGTACTGAAGCTGAGGCCGTACAGCGT  
TTCGAAAGTTCTGCTGAAGGATAATAAAAGTTTTGATATGGGCCTTGACAAAATTAACCTCAATAATTTAGTGGGCCTGGGTCT  
TTCGTTGACGATATTTCAAGCCCTGCATCAACCTGCGGGCGAGCCAGACCATCCTTAAAGCCTGTTATGATAGCGCCCTGA  
AATCCTATCCAGCCGGGCAGGTTGCGCTGAGACACGCGTTTTCTGCTACAACACCGGCTCACTCATAAACGGGATTTCTAAC  
GGGTATGTCACGAAAGTTATCAACGTGGCGCGTCAATCAACTGATTTGAAAATCCCTACGCTGCTACCTGATGGCCAGACCAG  
TGAGGACAGCACCGGACTGAGCCTCAGCAGGCAAAAAGTACGGCCACGCAGTATGACGGTGAACAAGATGTTTTTGGTTC  
GGGTGATGGCGATGCCTTCAGCCGAAATAATACGGATGCCTTTTTAACCAAACAGGAAACAGCGAAGGGGGAGTGAGGTTA  
TGGATGGAACGTTTGTACCTTGTATTGCAATCACAGATCCTGGAGCTATTTGAAACAGGAAAAGTGAAGGAGGTAACGATAA  
AACGGGTTTCATTAAGACGTGGTATCCCGTTTTTTCAGATAGACGATGAACAGTTGGGCCAGATCGCATGTTCCATTCCGGGT  
AACAAAGAGCATGAACTACGAACCTGGGCTGATTTAAGGCTACTGGCAGAGTTTTTGAAGATAAGTGTGGCGTTGAAGAAT  
GCCGGTTAAATCTGCAATCAACAGAAGATAGTGAGTAAGGAGAAAGTATGACCACGTTGTTTAAAGAAGTATGGCCCTGCGGT  
AGTTATGGGCGTTTTGTCCATTGCCCTGCCGCAAATTGCGCTGGCCGCTGGCACCGATACTGGTGAATCAACCGCTACATCAA  
TCCAGACGTGGTTGAGCACATGGATTCCAATTGGTTGTGCTATTGCGATCATGGTTAGTTGCTTTATGTGGATGCTTACGTA  
TCCAGCCAGCTTTATCCTCGTATCGTAATCTCGCTGATTGGTATTGGTTCTGCATCATTTCTGGTTTTCCCTGACGGGCGTAGG  
AAGCTGAACAACGCGAAAAGGGGGGACTTTTTGTCCCCAAAGTGAAGACTACAAGATGTTGCTTGACGGGAAAAGACCG  
CTTTTCAAAGGTGCGACTCGTTACCTCGCGCGCTGGGTGTACCACGTAATGTAGCTATGATGATTTTCATGATTTCTGCCTCGC  
TTTTTATGATTATTCATATGTGGGCGATCCTGGTGTTCGTCTTTTTGTGGATTCCCTCAGCTGCATTAACAAAATATGACGACCGC  
ATGTTTTCGAATTATGGGCCTGTGGTTGAAAACCAAATTCAGTAATTGGTTTATTCTCCGTTAAGCAGTGGGGAGGATCGTC  
TTATTCTCTGTTGACTACAACGTAAGGGTTTAAAATAATGAGAGCTGCCACCGCTACGAAGCCAAAAAAATGATGCCTA  
CCGTAAGGAGCCATCAGTAAATAAAAAGTATTTGCCCTATTCTTATCACCTCAATGATTACGTGATTTTCGATGGAAAACGGCGA  
TCTGATGGCTTTTTTCAAGCTGGATGGCCGCACACATGACTGCGCATCAGATCGGGAACCTGGTACCTGGCATAAAGACCTTA

ATACGCTGGTCAAGAGCTTCGGAACAGACCATGTAGAGCTGTGGACGCATGAATATCACCATGAGGCTAAAGAGTACCCGGA  
TGGTGAGTATGACCATTTTTCCCTGCTTATGTTGATCAATATAACCGTAAGCTGCACGGTGATTCCAAGCAGCTGATTAATGAC  
CTTTATCTGACCGTTATTTACAAACAGGTAGGGGATAAAACACAGAAGTTTCTGGCGAAATTTGAAAAGCCGACTCGTGACG  
AAATTCAGCGAATGCAGAATGAGGCGCTTGAAGGTCTGGAAGATATTTCTGAACAAATCCTGGAAGCAATGAAGCCGTATGG  
CATTGAGCAGTTGGGTATCTATTATCGTGACAAACGCGGTGTTGAAATTCCTGCGCCTGATAAAAAAGAACGTGAAGAAGTTG  
CTGAAGTCGATGAATCAGACATTTTTGACGAAGCCATTGTTATCGAACGCAACGAGCCTGAACCTTCGCAGGCTCACGCTTAT  
TCAAAGCGCTGGAGTTCCTTTATTTCTCGCAAATATGGAATGGGCCATCGTGCTGTTTGCCGTGATCGTATCCGTGAGTAC  
ATCATGGACAACCGCCCTGTTAGCTCACTGTGGGGGGATGTTGTCCAGATCAGAACGGTAGATCACAACCTTCTATACCACCGG  
CATTGAATTCGTGAATACGAAGAAGATACAGAGCCAGGCCAGCTTAACATGCTTAAAGAAGCCGATTTTGAATACCTTCTGA  
CGCAGAGTTTTTCTTGCCTCTCTGAATCTTCAGCTAAAACGTTTCTGACGCATCAGGAAAATCTTTGCAGGAAACGCGCGAC  
CGTGCGCAAAGCCAGCTGGCACAGCTTGGTACCGCGCTCGATATGCTGACGTCAGAGAGTTTCGTGATGGGCTACCATCATG  
GAACCGTGCATGTCTGGGATAATGACCAAACGCGGTACAGCGCAAAGCGCGTTCGTGTGAAGGTTATGCTAACCGGCTGTG  
GCGTGGTTGGCGGGACTCTCAGCCTGGCCTCTGAGGCTGCATATTATGCGAGACTGCCTGGCAACCAGAAATGGGCGCCGC  
GCCCCGTTCCGATAAACTCATGGAACCTCCTGCACTTCAGCCCGTCCACAATTTATGCGTGGCAAGCCTGACAATAACCCGT  
GGGGGCCAGCGCTGACCATGTTCCGCACGATCAGCGGTACGCCACTCTATTTTAATTTCCATGTGACCCCGCTTGAAGAAGTT  
TCCTACGGTAAACGCCCGCTGGGCCATGCGTTAATAACGGGTATGTCGGGGGAAGGTAAAACCACGCTGCTTAACTTCTGCT  
GGCGCAGTCAATGAAGTACAACCCGCGGCTTTTTGTTTTATGACCGTGACCGCGGTATGGAGCCGTTTATTGGAAGCGTTGGT  
GGCTACTATAAAGTTCTGCAACAGGGTATGCCGTCCGGGTTTGGCCGCTTACAGATTGAACCGACCAAACGCAATATTGCCCT  
CATTAAAAACCTGTTCCGCATTTGTGTGGAAACCACCAATAACGGGCCTATCAGCGCAACGATGGCTACCGAAGTGGCTGAAG  
GCGTTGATGCGTTATGGGGGAAGGCTCACTTATCCACGCGAGGCGCGCACCGTTACTATCCTGGACGGGTACGTGAATGA  
AGTTGTGAAAATGGCGTATCACTGAAAGGGCTGCTGCGCGAATGGACGCGCGAAGGCCAGTATGGCTGGCTGTTTGACAA  
TGATAAAGACAGCCTGGATCTCAGCGGAATGATATTTTTGGCTTCGATTTATCCGAGTTTATCGCAGCCAAAGAGGAAGTATC  
CAGCCCCGCCCGTACTCCGCTCATGATGTACCTTCTGTACCGGGTACGTGACTCCATCGACGGCAAACGCCGCGTCATTGAGT  
GCTTTGACGAGTTCCACGCCTACCTTGACGATCCGTTATCGAGCGTGAAGTTAAGCGTGGTATCAAACTGACCGTAAGAA  
AGACGCTATCTATGTGTTTGGCACGAGGAGCCGAACGATGCGCTGTCCAGCCGTTATTGGCCGACGATCATGTGCGAGACCG  
TCACAAAAATCTGCCTGCGGATCCGGAAGCTATCCGAGAGGATTATGCCTTCTTACTGATGCTGAATACGACGCGCTGATGT  
CGATTACCGAACACTCCAGACAGTTTCTGGTTAAACAAGGGCAACAGTCTGCGATTGCTTCTTTCAATCTCTACCTCGCAAC  
AGCGACGATATTGATGCAGATATTAAGACAATGGACAACGTTTCTTAGCGTGTGTCGGGTGAACCACAAAACGCCGAAATTGC  
GCATGAGCTGGTTGAACGGCTCGGTAATGACCCTGAAGTATGGCTCAAAGAATACTGGCGCCTGACGGCTTAACAACGAGGC  
AAAACACCATGAAAAAACTGACGGCAGTATTGCTGACCACCGGCCTGATACTGGGAGGCGCGCAAAGCGCTTCCGCAG  
GCATCATCGTGACCAACCCTACTGAGCTGGCTAAACAGGTCGAGCAGCTTACGCAAATGGCGCAGCAGCTGGAGCAGCTTA  
AAAGCCAGCTGCAAACGAGAAAAATATGTATGAGTCGATGGCAAAGACAACCAACCTGGGCGATCTGCTGGGGACGTCTA  
CCAGCACGCTGGCAAATAATTTGCCGGACAACCTGGAAGGAGATCTACAGCGACGCCATGAACTCCAGTTCTTCCGTCACGCC  
TTCAGTTAACAGCATGATGGGCCAGTTTAAATGCGGAAGTTGACGACATGACGCCCAGCGAAGCAATTACCTACATGAACAAA  
AAGCTGGCTGAAAAAGGCGCTTATGACCGTGTATGGCAGAAAAAGCCTACAACAACCAGATGCAGGAACTAACCGATATGC  
AGGAGCTGACGGAGCAGATTAACGACTCCAGACCTGAAATCGATTGCTGACTTACAGGCCCGTATCCAGACGTCACAGG  
GTGCTATTCAGGGTGAGCAGGCGAAGCTGAATCTGATGAACATGTTGCAGCAGTCACAGGACAAGCTATTACGTGCGCAGAA  
AGAACGTGCCACCCACAATTTTGTGTTTTGGAACCGGCGGGGACGTTACCGCGTCACCTTCAATTAAGTGAAGTAATTATGAAA  
AACTACTGCTTGTATCCCTTCTCCTAGTGGCCTGCGATGCCTCGCATGACGTGGAGTGGTACAAAAAACATGAGAAAGA  
GCGCAAGGCAACAATTCAGGAATGCAAGAAAGACGCGGATGAACTTCAGAAACCTGATTGCAAAAACGCGCGCGAAGCCG  
ATCGTCAGCTGTTTGTGTTTCGGCAAAAAGACGGCGAAATCAATTCACCGAAAATTTAGGAGTAAGGAGGCAATATGGCATT  
CACCTAGTCGCAGACATTTTCGCAAAAGTAGACGGGGCGATTACGTCAATGGTGAGCGCCAATGTTGCCACCATTATCTCTG  
ATGTAACGCCTCTGATTGCCACCTGTCTGACAATCAAGCTGATGGTTCAGGGGATGTAAGTACTCAGCGTTTAAATCCGGGGGCGGGC  
GACAGCCTGAGTTCGCTGATTAAGAGTATCTTTCCATAGCCCTTATCCTGAGCTTTGCAACGGCGGGCGGCTGGTATCAACA  
GGAAGTGGTCAACGTGGCGCTTACCTGCCGGATGATTTTGGCGGATACTGTCTGCCCTAATAAAGTCGGTGAAGTGGC  
GTACCGGCGATTATTGATAGCGGTATTGAAAAGGTATCAAGATCGTCAACACCGCATGGGAAGCCGAGACGTGTTTTTCATC

GAGCGCCTGGCCGCGTATGCCATTGGCGGCATTATGATGATTGCTACCGTTGTGCTGGGCGGCCTCGGTGCGGGCTTTGTG  
ATCATGGCTAAGATCCTTCTGGCCGTTACGCTTTGTTTTGGCCGATTGCAATCTTCTGCCTGCTGTGGGGAGCGACAAAAA  
CATCTTTGCTCGCTGGCTGGCGTCGGTCATTAATGATGCTTGTGCTGCTATTCTTGCCTCGTGTGGTTTCATCATGCAG  
ATGTTTCGACAACCTCCTGTCCTCGATGAACCTGATGCCGCTTACTCATCAATCACTGGTTCTATCTCCGCTTATTACTGACGGT  
CATTTCCGTTTTCGTTCTGTTCCAGATTCCGCAAATTGCCGCCAGCTGGGGTAGCGGTATCAGCGCCGGAGTTGCTGACGCCG  
CACGCTCTACGGGTTCTTCCATGCAGGCGCTTGGCAATATGGGCAGCCACGGCATGTTTGGCGGTAATGCGTTCAGAGGCGG  
TAACAGTGGCGGCGGCCAGCAATCGGCAGGTGGAGGAAGTGGCAGCAACAGCGGAGGAAGCAGTGGTTCTAATTTAAGTG  
GTAAGGCAAGGGGCGAGTCGCGGGAAGAAGGCTGCATAAAATTAACAAAAGTTCGTTGAAATTGCAATTTGACGACTTAT  
TATAATTAGTACGTTCAACAACCGATAATGGATGCCGTAATGCGCAGCTTATTGCTTATGGGAGTTCTTCTGATTAGCGCTGTT  
CCAGCGGGCATAAACCGCCACCGGAGCCGGACTGGAGCAACACCGTTCCAGTAAACAAAACAATCCCGGTTGATACGCAAG  
GTGGTGCAAATGAAAGCTAATAAAAAACAGGGCTTACACGTGAAGCCATTAAAGAGTTCAACGAAAGCCGTAAAGGGCTT  
GAAGTTGATCTGATGGATGAAGTGTGAAGTCCCGGCGTACCGCCTGGATGGTTGCCACCGGTTACAGCGGTGGTAACTGTTT  
TTGCACTCTCTTTAGTTGGTTACGTGGTGCATAAGTACAGCCAGCCAATCCCCGCACATCTGCTAACGCTCAACGAGGCCACTC  
ACGAAGTACAGCAGGTCAAGCTGACCCGCGACCAGACCTCTTATGGTGACGAAATTGATAAGTTCTGGCTGACACAATATGTC  
ATTCACCGTGAGAGCTATGACTTCTATTAGTTTCAAGTTCAGGTGACTATACGGCCGTTGGCTTAATGTCCACGCCGAACGTGGCAGA  
GTCTTACCAGAGCAAGTTCAAGGGCCGCAACGGTCTTGATAAGTTCTGGGCGACAGTGAACGACCCGCGTGAAGATTAA  
CTCTGTGATCCTCGATAAACCGCACGGCGTAGCAACGATACGCTTACTACGGTTCGCCGCGTGCAGCAATCCCGTTGATG  
ATCAGCCGCGAGCGCTGGATTGCCATTATGGGGTATGAATATAAATCGCTGGCGATGAATGCTGAGCAGCGTTATGTCAACCCG  
CTGGGTTTTCCGCGTGACGAGTTATCGCGTCAACCCTGAAGTTAACTGAGGGCTGCCCATGAAAAAACTACTTCTTTTCAGCAG  
TCGTTTTGTGAGTCTGGGAGGCGCGGCCACTAACGTTATGGCGCTTGGGTTGGCCGCAATTCTCCTTATGACTATCGCATT  
AAAGCGTTGTTTATAACCCTGTTAATGTGGTCAAATTGACGCTATCGCCGGTGTGGCTACCCACATTGTTGTCGCGCCTGACG  
AAACCTATACACTCATGCTTTTGGCGATTCTGAAAGCTGGACGTTTGCGCACAAAATGAACATTTTTTGTGAAGCCGAAA  
CAGGCCATGAGTGATAACCAACCTGGTGATCGTCACCGATAAGCGCACCTATAACATCGTCTCCATTTTCATCGGTGAAGAAACG  
AAGAAAAATGCAGACGGTACGGTATCAAATCCTTTATTGAAACGCCGTGGGCTGTGCGCCAGGCCGTTCTTCAGCTGACCT  
ATGAATATCCGTTTGGAGCAGCAGGAAAAAGCCAAAAGCGCGGCTGATAAAAAACGCATTACGCAGAAGCTGAAGCAGACGG  
CTTTTGCGGGGGCGAAGAATATCAGTACGTAATGAGCGAACAGCCTGAAATGCGCAGCATCCAGCCGGTTACAGTCTGGG  
ATAACTACCGCTTTACCCGTTTTGAGTTTCCGGCCAATGCGGAGTTACCGCAGGTCTACATGATTTTCGGCCAGTGGAAGAA  
ACGCTGCCTAACTCTCATGTTGTGGGTGAGAACCGCAACATCATCGAGGTGAAACCGTGCCTAAAGAGTGGCGTATTCTGCT  
GGGCGATAAAGTCGTTGGCGTTGTAATAATAATTTCCGCGCCGGGCGCCGGTGCAGTAGCAACCGGTACGGCTTCCCCGGAT  
GTGCGCAGGGTTCAAATTGGGGAGGATAACTGATGGCCGTAAGAGTGTGATGTAGATCAGGAACTCGATGAAAACCCG  
GAGACGGTGAATTCGAAAGCGAGCGTGGCGGATTTAAAGGCAGTAACCGCCGTTCCGGCTCCTGGTATGAAAGCCTTTGTCAT  
ACTGATGGCGCTGCTTGGTTTGGTATTACGCGGATTACGGTTCATGGGTAAAATTCGCACCCCGGCTAAAGCTGAAGCTGATA  
AAGACGGTGGTAAAGCGCAACAGGCCAATACACTGCCAACTACAGCTTTAACAGCGATCCTGATGTTAATAAACCTGCAACT  
GCGCAGAATAGCGCCACTGATGCCCGTGTGTGCAGGCTGCCGCACAGGCAGATGCAGATGCGGGCAGCAGCAATACCGCC  
GCGCGTACCTTAATAAGCGTAAAGAACCTTCGCTGAAGAAGTGGCTATGCAGCGTCTGCTGGGCGGCGAGCTGGCCGAG  
CTAATCAGGCGGCTACAAGCAATAGTCCCGGAGTGCAGCCCCAGGACAACGAAACAAGCGAAGGTAGTTTCAGCACTCGCTA  
AAAACCTGACTCCTGCAAGGCTGAAGGCTAGCCGCGCTGGAGTCATGGCTAATCCCAGCCTGACTGTTCCGAAAGGCAAAT  
GATCCCCTGTGGTACCGGCACCGAGCTGGATAACCACTGTTCCGGGTCAGGTTTCTGCGGGGTTTACAGGACGTTTACTCA  
GCTGATGGACTCGTTAGGCTGATTGATAAAGGCTCATGGGTTGACGGGCAGATTACCGGTGGTATCAAAGACGGCCAGGCG  
CGCGTGTGTTTCTCTGGGAGCGTATCCGCAATGACCAGGACGGGACAATCGTTAATATTGACAGTGCCGGAACGAACTCAC  
TCGGCAGCGCGGGATTCCGGGCCAGGTGGATAACCATATGTGGGAGCGTCTGCGTGGTGCATCATGATTTGTTGTTCTC  
TGACACCTTAACGGCGCTGGTTAACAGACGCAGAGTAATAACATTCAGTACAACAGCACAGAAAACAGCGGTGAGCAGCT  
GGCGTCTGAAGCACTCCGCTTACATGTCTATCCCCCTACCCTCTACGATCAGCAGGGTATGCGGTGAGCATTGTTGTTG  
CCGCGACCTCGATTTACAGCGCGTTTTATACGCTCGCAGACAATAAAAAAGTGGGCGCTTAGCGCCCCGTTTTCTTCAGGAG  
TAATCATGACTGATGCAGCTTTCTATCAACTTGGCCACTGCGCGAGTATTTAGAAGATCCTACTGTTTTTGAATTCGCATTAA  
CTGCTTTCAGGAAGTTATCTGTGATACGTTACAGCGGCCGAGGGTTGTGAGAACGCGGCAATTACGGCAGATTTTATTAGG



AACCTTGCTAAATCGTTGGTGAGCAGCAACAAGCTGACCATGCAGGCCATTAATGACGTGATCCTGCCTGGCGGGATCAGGG  
GCGTTATCTGTCTGCCCCCTGCGGTGATTGACGGTACAACGGCCGTAGCGTTTCGTAAGGATTTGGCGGCCGATAAAAATCTG  
GAGCAGCTGACCCGCGAGGGGATTTTCAGTGACTGCCGGAAGATTACCGGCAGCAAGCAAAGCCTAACGGATGATGATTTT  
TTCCTTAAAGAGCTGCACAGCAGCGAAAAATGGCCCCATTCTGCAAACCGCCGTTGAGAAGAAACGCACTATCGTGATCT  
GCGGTGAAACCGGGTTCGGGGAAAACGGTACTCACGCGCGCTGTTAAAATCGCTACATAAAGACGAGCGTGAATTATTTT  
AGAGGACGTTACGAAGTCACGGTCGATCACGTTGTAGAAGCCGTTTATATGATGTACGGCGATGCAGGAAAGATCGGCCGC  
GTCAGCGCCACTGATGCCCTGCGAGCCTGTATGCGTCTGACACCGGGCCGTATCATCATGACTGAGCTTAGGGATGATGCTGC  
GTGGGATTATCTTAAAGCACTTAATACCGGCCATCCAGGCGGTGTTATGTCAACGCACGCTAACTCTGCGCGCATGCCTTTAA  
CCGTATTGGGCTGCTTATCAAGGCGACCCCTATCGGCCGTATGCTCGATATGAGCGATATTATGCGAATGCTCTACTCCACCATT  
GACGTTGTGGTGCATATGGAAAAGCGGAAAATCAAAGAAATTTATTTTACCCTGAATATAAAATGCAGTGTGTGAACGGGA  
GCCTGTAATGAAAACTTAGCAACCTGGCTTCTGGCCGAGCATTACGACAGCCGCCCTGCCCGCTTTGCGGTGGAACCA  
TCCGTTCAAGTTGGCTACTCGCCTGAAGGGGGGTAAGCGGGAACCCAGAAAATTCCGCCATTCCGCATTGTGGAATTTTT  
TGGGGGGTGGTCCGCGCATGACGACCCGCCAAAGGCTACCGCATCTATCTGAGGCGCTGTGGCGCGACGCTGAAACCCCG  
GGGAATTCCGCTACTCCAGTCCAGGTCGCAATAGTTCGTCCAGGTCGGGTGGCGTACGCCGAAACGCCGATTTTTCCGC  
AACCGTTTTCTGCGTTGTGCGCAAGGTGGTCTCAGAGAGCGCTCAAGAAGCGGTTTTTCTCGTATGTTTAGCTACGGTGGCCT  
AGGAGCCTGCGCGCAGAAGCCAAATCGGCGAAGATCGAGGACGATACGGGGATGGCTGCCAGTTACCTTCTTACCGAC  
CCGACCAATCCTATCTGCTGCCCCCTTCTCTGGGAGAGTGGCTACCTGAAGGGCATCTTGCTACTTCATCAGCGAGACTGTC  
GATACGCTGGACTTGAGCGCATTCCACGCCGGTATGCCGCGGTGGTCCGGGCAATCAGCCGTTTCATCCGGCGATGATGG  
TCAAAGTGCTGATCTATGGTTACGCGAGCGGCGTCTTCTTTCGCGCAAACCTAGCCAGGAAGCTGTACGAGGATGTCGCGTT  
GCGTGTGCTGGCCGCTGGAACCTCCCGGCCACCGCACGCTGAGTGACTTCCGTGCCCTACACCTGACCGAGCTTGAGAAT  
TTGTTTCGTTACAGTGGTGCAACTGGCGCGCAATGTGGGCTGGTGAAGCTTGGCACGATCGCGGTGACGGCACCAAGGTA  
AAAGCCAACGCCAGCCGCCACAAGGCGATGAGCTATAAGCGCATGAAGCCGGCCGAGGACGAATTGCATTGCGAGATCAAG  
GCGCTGCTTGATCGCGCAAGGCTACCGACGACCAGGAGCGTAACGAGCCGGAGCTGGACATTCTGCCGAGATTTCTCGC  
CGCGAGAAGCGCCTGGAGGCGATCCAGGCGGCAAAGGCGCGCCTGGAAGGGGTGCGTTCCGGCTGAGGGCGAAATGACA  
CCCTAAGCTTTTCGTTTCTTGGGCCAAAGATATTCGCCAGTCAGTAGAATGTGCGCCAGCCCAATGGGGATATGTGGGGAA  
GAAATTCAGGGGGAACATCAACCCTTCGTTCCGCCGCTCCGTGACGGCATGACCAAGATGGACGGTATTCCAGTAAATGAT  
CACCGCAGTCAATAAATTGAGCCCAGCGATTCCGGTAGTGCTGCCCTCTGTGCTGCGATCGCGAATTTCCCCCTGCCTCCCGAT  
ACGGAGCGCATTTTTGAGCGCATGGTGGGCCTCTCCCTTGTTAAGACCGATCTGAGCACGCCGCTGCATGTCCGTATCCAGGA  
TCCACTCAATAATGAAAAGGGTCCGTTCAATACGACCAACTTCACGAAGCGCAACTGCAAGGTTGTTTTGTCGTGGGTAAGA  
AGCGAGCTTGCAGGAGTTGGCTGGGCCTGATTTTCCAGCGGTATCGTTCGCGGCACAACGGAAAATATCAGGCCAGTT  
CGCAACGATAAGATCCTCCCGGGCTTTTTCCACCTACCAACTTCGTAACCTCCCTGGGGGTGCTATCGGGATTAATAACGTACAA  
CCGCTTCGATGGCAGATCCCTGATTTCGAGAACGAGATTGTAGCCGAGCAGGCTACTGGCTCCGAACAAATGGTCGGTGAAT  
CCTGCTGTATCGGCATACTGTTTCGCGAACATGGCGACCGACCTCGTTCATCAGTAGTCCATCGAGAATATACGGTGCCTCGCTC  
ACGGTCCCGGGATCGACTGACAAGCGAATGGCGGAACTGGTCGCTTACGTGAGTATACGCTTTGAGGGCCGGGAACAGAA  
CCATATTTGGCATTGACCATGTTTCATGGCTTCGCCATGCCGCGCTGTGCGGAAAAACTGACCATCGCTCGATGCTGACGTGCC  
CATCCCCAGACGCGTGACATCGGCAGTTTACCCTGCGCGGCCACCACAATTGCCAATGCCTGGTTCATGGCTTCGCTTTCAA  
CATGCCAGCGGGCAAGGCGTGAGAGCTGCCAGTAATCATGCGTGTGTTGTAGCTTCCGCCATCTTACGCAGGCCAGATTGAG  
CCCTCAGCGAGCAGGACGTTGAGCAGACCGATCCGGTCGCGACATGGAGCCCCGTTCTCAGATGGGTAAACGCATCTGT  
GAAACCAAGGGTGCATCAACTCAAGCAGCATGTGCGTAATCCGAACGGACGGCATTCCGGCGATACAGATCCAGTATGAGT  
GCCTCGGCACCATCCGGCACGTCTGCTGTCAACCTGTCGATCCGCAACGTTCCATCTTCTATGCTACCGTGCGGAATAGTGCCG  
TTACGGGCAGCCCGGGCCAGCCGCTTAAGAGCGATCGTGAGTCGCGCCTTTCTGTCTGCCAGCCAATCCTGTGGGTTGGAAG  
GCACGGCCAGTTTTGCATTTTCTGCGCCGCGATCATCGGCACCAAGTACCTGCTTGAAGTACCATAGCGGCGCGAATGAGC  
GAGCCAGACATCTCCGGAACGAAAAGCATCCCGGAGGTGAAAGAGTACCGCCACTTCCAAAGACGGGTATCTCTTTTTCC  
TGAGCTCGTAAATGACGGTTCATTTGGAGCTGGGCGCAGGAAACGCCTTTCTGGCGATGCAACACCTTTTCATCTCTCCGAT  
CGACAAAGCTGCTGCTACCAATGGTCCGGCGACCGGCGCGGCTTCGAGCTTACAGACAGCGCAACATGCGGGGCGCATAACG  
ACGAAAGCGATGGTATCCCTGCCCGACATATGCAAGAGGCTCATCGGCTAGCGTGTGCTGAGTTGAGTCCCTGTCGCTACCA

GTTGAGCGAGCCGGTCCCATGCAACCGAACTGGCGACAGCCATCTCCAGCGGGGTTCCGTCACTGCGGGCCTCAAGCAACG  
AAGTCCCAGCGCGGTGAAGGTACGGATCGTATCCGTGAGTGTGGCTTTAGAGCCGAAATTGTTTCGTATGCTGGCGCTT  
CGTTCCCAGGTTTTCTACGATCCTGTATGGGTTTCGACTATGGCATCAGCAATCGCCGTTCCCACTCCACAACACA  
GACGGCAAGGATCGCCAGCGGCGGTCCGAAGTATGTCACGCAAACCGTTCGGTGAAGTAGCGTTACCCCTGCCGACGCA  
GCCGGGCAATGCGATGGGCAGGTATGCTGGCCAAAGCACTATGATTGATATTCAGGGTACGCAGAAATTCGAGCCTGTGAG  
CAAACGGTTAGCAGCAGCCGAGTTGTTACCAACCTCGAAGTTGCGAAGCCAGATGAAACGACTGATATTGCCGGCGAGCATT  
TCACTCAGAAGTTTGTCCAGGTGATCGCGAACATCCGCTGTAAATTTCCACAATCCGCGTTTCAATCCGCCGCTCAGCGGC  
GACCAGAGCATCCGCGCACAAGCGCTCGATTGTCGATACTGCGGGCAGAATGGTGGAAAGTTTCCGACACCCGACAATAAA  
ACGATGAGCAAGATCCTCGTTTGTATCTGGCATCTTCGGCCTGGCCGAAAGTCCACTCCCGCAGATCACGGGCACCACGGCCC  
GTGAAGGTCTTGTAGCCGTAATTTGCGCGAGCGTGTCCATGTGCTGCTGACGGGTTTGGCGCCGTGTGGCATAAGTGAGAA  
GCGCATCAGCCGAACTCCAAGCTGAGCACCGACGAAGGAAAGGACTTCACGCGGGATCATCTACCAGGAGCCAGTGCA  
CGCCCCGATATCGTAAGGCACAAAGTTGCAGGGCAAAGCCAATCCTGTTTTCCGGTCTGCGGGCCTGCCTAATGTTTTCCA  
GGTCATCATCGCCAGCGTGTAGAACTTCAGTAGCGACAGTTCGTCCGTGGGCAGATCGAACAGCGCTGCTCGCTGCCGTT  
GGTGAAAATATGGCGTCGTGACATACAAATTCGTCCCTTTGAAGTATAGTCTGTTTTGGACAACAGCCAGCCATATAAATCA  
GGGCGTTCGGATACAAAATCCAGGAGGGTTCAATTGGGACATCGTGCCGCAATTTACTGCCGGGTTTCAACAGCGGATCAG  
TCTTGTGAACGCCAGGAATTTGATCTGCGAGCCTTCGCCGGCCGTGCCGGCTACGACGTGGTGGGAATATTTAAGGAAACAG  
GTTCAGGAACTAACTCGACCGGGCCGAGCGAAAGAAAGTCTGCGCCTTCCCAGTCCAGACAAATTGATGCAATCCTGG  
TCACTGAGCTTTCCCGGTGGGGGCGCTCGACGCTCGATCTGCTCAATACGCTACGTGAACTGGAGAAGTGGAAAGTTTCCGT  
GATAGCCATGAATGGAATGGCGTTCGATCTTTGTCGCGCATGGACGAATGCTGGCGACGTTTCTTTCCGGCATTGCGGAGT  
TTGAGCGGGATCTCATCAGCGAGCGGGTCAAGTCAGGCCTTGTGTTGCGAAGGCACGTGGTAAGAGGCTTGGTCTGTCAGG  
CCGGAGTGCGACCAAATCAGACCGACTTTTGCCTAAGGTGTTGCGATGAGGGCCGAGGGACGCAGCTATCGCTGGATCG  
CACGCGAGCTCGGTATCAGCAAGAATACCGTCGCTGACATCGTGAACGACACAGAGCTAACGCTTAGGGTGTCAATTCGCC  
CTCAGCCGGAACCGACCCCTGGAAGCGCGCCAGCGTGAAGCGGACCGCCGCGGGGGCGCAGCGAAGACGATGGCCGCC  
GGCCTCGCCATCCGATGGCTCGGACAAGGGCGGTGGCTCGTACAAACGCGAGTTTGGTGTGCCGGATGACCGTGATCAGG  
AAAGCTTCACCGATCCGGACAGCCGATCATGAAACACGCCGTTGGTGGCTCCGAGCAGAGCTACAACGGGTACACAGCGG  
TCGATGCCGAGCACCAGATCATCGTGGCGGCGGAGTTGACCAACTGCGCCGCGGACAGTCAGGCGCTGCTGGGCATGCTGG  
CAGCAGTTCAGGCCAACACCGGAGAAATGCCGGCCAGACGCTGGCGGATGCGGGATTCCGTAGTGAGGCTGTTCTGGCA  
AAGGTGCCGATCACCACGGCGATGTCATCGTTGCCCTCGGCCGCGAGGGACGTGAAGATGCCAAGGTCAATGCCAAGACC  
CATCCGCATACGGCGGCGATTGCGGCGAAATTGAAAACGGAGCAAGGCGATGCAGCTTACCGCCGGCGCAAGTCGATCGTG  
GAGGCTCCGAATGGTTGGATCAAGGCGGTGATGGGATTGCGTCACTTACGATGAGGGGCTGGACAAGGTGCAAGCCGA  
GTGGAAGCTCGTCTGCATGGCGCTAAATCTGAGGCGAATGGCGTATCTGTGAGGGCGAAGGTTAAATGGGGCGGCTCAAAT  
GCACCCAGTCGTATAACACGCCGCGCGCCGAAGATTGGTATCCTTGGCGCCGACGCTTGCCTAATTGCAGAGAGCGCCG  
CCGCCATCGTCACTGCTCTACAGAAAACCGGTCACACGGCTCTGCCGCGCAGACTCCTAGCCTAAATGTGACAGTGGTTGGT  
AATCCATGCCGCCCAGGAGGGCGGCGGTGGTGGGCCAATAGATGATTTTCAGAGCCTTACTGCCCGTTGACGCCAATCCCT  
CGAGCGCGAGTCTAGCCGAGCGGCGATGACGGCCTCGCTGTGCTTGTATCCTTGTAGGCGCCGGGTGTAGACGGCCA  
ACACAATAGGTGCGCGCCAGTGGGCCAGACGACGGCAGTATTTGCCGTGCCATACTCCGAGGTTCCGGTTTTGTC  
TCCGACTGCCAGTCTGCCGGCACCGCCGCGGATGCGGTGGTTGCCGGTCTGTTTTCCCTTAGCCAATCAACAACTGC  
TGCCGCTGCGGCGCAGCCAGTGACAGAGCCAGTGTCAGTTTTGTAAGCTTTCCGTACGGCGCGCGGCGATGAGGTATCG  
CGCGCATCGCTGGGATGGCGGAGTTCAGCTCCAGCTCCAGCGGTCCAGACGGAACGTGGTATCGCCGATAGAGCGCATG  
AAGGCCGTACGCCGGCCGGCCGCCCCAACTCCTCAGCAACAAATTGGCGGCGGCGTTATCACTGTATTGCACGGCGGCC  
GCGGACAGCTCCGCCACCGTCATGCCTGTTGTGAGATTTTTCCGAGATGGGTGACCACGGAACCAGCGCATTTTTGCCGTA  
ACGGATGGGTGTGTCAGCAAGCCGGCCTGCTGCTGGCTGCGAGCCAGCACAGCGGCAGCAAGAAAGCCCTGAATGAGC  
TGCACAGTGGGAAGCGCTCCTCAGCGCGGTAACCTACAGTTGCGCCTGAGCCGGTATCCATCGCGTACACACCGATGGAGCC  
GCCAAAGTCTGTTTCGAGTTTAGCGAATGTTCCGCGACGAGTTGGTTCAGCGCGGTGGCAGAAAAGCCAGCCAGCGGCC  
ATGAGAGACAAGACAGCAGAACTAGACGGCGATACAGTGACATCAACGATATCCTTGTGTTGAAGGTGGAGTTACGGACGG  
CCTCAGGAAGTCTGGCCAAGCCCCGACTATTGGGGCGCGAAGATAGCACCGAGGGTACGCCGGTGTCAACACGGGGTCTG

ACGCTCAGTGGAACGAAAACACGTTAAGGGATTTTGGTCATGAGATTATCAAAAAGGATCTTCACCTAGATCCTTTTAAATT  
AAAAATGAAGTTTTAAATCAATCTAAAGTATATATGAGTAAACTTGGTCTGACAGTTACCAATGCTTAATCAGTGAGGCACCTAT  
CTCAGCGATCTGTCTATTTTCGTTCCATAGTTGCTGACTCCCCGTCGTGTAGATAACTACGATACGGGAGGGCTTACCATCT  
GGCCCCAGTGCTGCAATGATACCGGAGACCCACGCTCACCGGCTCCAGATTTATCAGCAATAAACCAGCCAGCCGGAAGGG  
CCGAGCGCAGAAGTGGTCCTGCAACTTTATCCGCTCCATCCAGTCTATTAATTGTTGCCGGAAGCTAGAGTAAGTAGTTCCG  
CCAGTTAATAGTTTTCGCAACGTTGTTGCCATTGCTGCAGGCATCGTGGTGTACGCTCGTCGTTTGGTATGGCTTCATTCAGC  
TCCGTTCCCAACGATCAAGGCGAGTTACATGATCCCCATGTTGTGCAAAAAAGCGGTTAGCTCCTTCGGTCTCCGATCGT  
TGTCAGAAGTAAGTTGGCAGCAGTGTATCACTCATGGTTATGGCAGCACTGCATAATTCTTACTGTCATGCCATCCGTAAG  
ATGCTTTTCTGTGACTGGTGAAGTACTCAACCAAGTCATTCTGAGAATAGTGTATGCGGCGACCGAGTTGCTCTTCCCCGGCGT  
CAACACGGGATAATACCGCACCACATAGCAGAACTTTAAAAGTGTCTCATCATTGGAAAACGTTCTTCGGGGCGAAAACCTCA  
AGGATCTTACCGCTGTTGAGATCCAGTTCGATGTAACCCACTCGTGCACCCAACTGATCTTCAGCATCTTTTACTTTACCAGC  
GTTTCTGGGTGAGCAAAAACAGGAAGGCAAATGCCGCAAAAAGGGAATAAGGGCGACACGAAAATGTTGAATACTCATA  
CTCTCCTTTTTCAATATTATTGAAGCATTACCAGGGTTATTGTCTCATGAGCGGATACATATTTGAATGTATTTAGAAAAATAA  
ACAAATAGGGGTTCCGCGCACATTTCCCCGAAAAGTGCCACCTGACGTCTAAGAAACCATTATTATCATGACATTAACCTATAA  
AAATAGGCGTATCACGAGGCCCTTTTCGCTTTCAAGAATTTTATAAACCGTGGAGCGGGCAATACTGAGCTGATGAGCAATTC  
CGTTGCACCAGTGCCTTCTGATGAAGCGTCAGCAGCAGCTTCTGTCCACGGTACGCCTGCGGCCAAATTTGATTCCTTTCA  
GCTTTGCTTCTGTGCGGCCCTCATTGTCGCTTCTAGGATCCTCCGGCGTTCAGCCTGTGCCACAGCCGACAGGATGGTGACC  
ACCATTTGCCCCATACACCGTCCGTACGGCACTGTTGCAAAGTTAGCGATGAGGCAGCCTTTTGTCTTATTCAAAGGCCTTAC  
ATTTCAAAAACCTCTGCTTACCAGGCGCATTTCGCCAGGGGATCACCATAATAAAATGCTGAGGCCTGGCCTTTGCGTAGTGC  
ACGCATCACCTCAATACCTTTGATGGTGGCGTAAGCCGTCTTCATGGATTTAAATCCCAGCGTGGCGCCGATTATCCGTTTCAG  
TTTGCCATGATCGCATTCAATCACGTTGTTCCGGTACTTAATCTGTGCGTGTTC AACGTGACGACGGGCACCGGCCTTCGCGTTT  
GAGCAGAGCAAGCGCGGACCATAGGCGGGCGCTTTATCCGTGTTGATGAATCGCGGGATCTGCCACTTCTTCACGTTGTTG  
AGGATTTTACCCAGAAACCGGTATGCAGCTTTGCTGTTACGACGGGAGGAGAGATAAAAATCGACAGTGCGGCCCGGGCTG  
TCGACGGCCCCGTACAGATACGCCAGCGGCCATTGACCTTACGTAGGTTTTCATCCATGTGCCACGGGCAAAGATCGGAAG  
GGTTACGCCAGTACCAGCGCAGCCGTTTTTCCATTTACGGCGCATAACGCTGAACCCAGCGGTAATCGTGGAGTGATCGAC  
ATTCCTCCGCGTTCAGCCAGCATCTCCTGCAGCTCACGGTAACTGATGCCGATTTGCAAGTACCAGCGTACGGCCACAGAA  
TGATGTCACGCTGAAAATGCCGGCCTTTGAATGGGTTTCATGTGCAGCTCCATCAGCAAAAAGGGGATGATAAGTTTATCACCAC  
CGACTATTTGCAACAGTGCCTTATTTTCGAGCATTCTTTCGCAAAAAGCCGACCGGGAAAATTGACATGCGTACCATTTCGCT  
GGGGTGTAAATAAGGCGATAGACACCGGTACCTACACATTTACCTTCGCGGACAAATCAACGGTTTCAGCCCGCTACACATTCA  
CTTATGCATGGGACGGTAAAGAGTGGAAAATTTCCACACACCACTCTTCAGCGATGCCTGAAGGGTAAAAGCTGTGCAGGG  
GGCGGAATATTCACCGCTCCCTGAAGACTAGCCAATAATCGCGATGCCAAGACGTTCCATGAGCAACGATGCCTGGTAGTTGT  
CCAATTAACGCCTTGTAATCAACGCGCCGAATATCTAAGTACCCAACTCCGAATTGGTCAGATCGCAATGTGTGAAGTTTG  
CTGCTCGCCAGTCGAAAAGTCGAAAACCTCGCCGCCGAGAGATCTGAACCACTGAACGTGCGGCCAGTACCTGGGCCCCCAT  
CCAACGGTTTTCCACAGCTCACACTTTTCCAACACGACTTTTCGAAAATTTGGCGTAGCTTAGATTTGTGTTAGTGATATATGC  
ACTGCAAAAACAGGTGCGAGTAGTGATCATATTCATAAACTTTCGCGCCGCAAAATCTGCGCCTTTCGCGCACGACAGTGGCGA  
ATTTCAATGCCAAGCGCACTGGCATTGCGAAAATCCGCCATGGATAAATCACAGCTTTTAAAATGGCATCTTTCAGCATCGCA  
CGACTAAAATTCACCCCTTTCTGGCTTTCACGATCATAGAACTGACAGCCGATAAATTCAGTGCCGCTCAGGTCCGGCACCTGA  
AAAATCACAGTTAAAATGTAATTTTCAATTTTCTCACCGGTGAAGCGGTTTCTGTTAATTTTTTCGCCAACGAGTGCCAG  
AGCCATATTTGTGCCTGTTTTTTTATACAGTAATGGCGTCATGGTAAACCCTGATGAGGTTATGCGTCAAATCCGCCAATATAA  
CATCTGCAATGTGCGTTAAATCTGGTGTTTTTTTCAGCAAAGCGCGAAGCTGATGGTAAAGTACAGCCAGTAATTCAGCGGCT  
TTTTTCTGTTAATTTTTGCCTGCTGTAAGCTGGTTTGTAGAAAGTCTTTCTTGTGCTGCTGGAATTCACGCAGATCCAGC  
GGTAAACCTACAGACATCGGTTTAGTTTCCGGCGCCTGCGGCTGCGTCTGTTTCTGAAATCCATCCCTGTCCGGTGTGCTTATG  
CAGTCTGGTCCGGACTCGGCGTCGCATAATTACAGCCATTGCCTGGTTGCTTCATGGGCAAAAGCTTGATGCGTGGGGCTTT  
GTAGGTATGGGGCTCATAATTGCTGCCTTTTTGCTCGCCGATCCCCATCGTGGAAGTGCCTGCGGAGGCCGACGCCATGGTG  
ACGGTGTTCGGCATTCTGAATCTCACCGAGGACTCCTTCTTCGATGAGAGCCGGCGGCTAGACCCCGCCGGCGCTGTCACCG  
CGGCGATCGAAATGCTGCGAGTCGGATCAGACGTCGTGGATGTCGGACCGGCCAGCCATCCGGACCGGAGGCCTGTAT

CGCCGGCCGATGAGATCAGACGTATTGCGCCGCTCTTAGACGCCCTGTCCGATCAGATGCACCGTGTTC AATCGACAGCTTC  
CAACCGGAAACCCAGCGCTATGCGCTCAAGCGCGGCGTGGGCTACCTGAACGATATCCAAGGATTTCTGACCCTGCGCTCT  
ATCCCGATATTGCTGAGGCGGACTGCAGGCTGGTGGTTATGCACTCAGCGCAGCGGGATGGCATCGCCACCCGCACCGGTCA  
CCTTCGACCCGAAGACGCGCTCGACGAGATTGTGCGGTTCTTCGAGGCGCGGGTTTCCGCTTGCGACGGAGCGGGGTGCG  
TGCCGACCGGCTCATCTCGATCCGGGGATGGGATTTTTCTTGAGCCCCGCACCGGAAACATCGCTGCACGTGCTGTGCAAC  
CTTCAAAGCTGAAGTCGGCGTTGGGGCTCCGCTATTGGTCTCGGTGTGCGGAAATCCTTCTTGGGCGCCACCGTTGGCC  
TTCCTGTAAAGGATCTGGGTCCAGCGAGCCTTGGCGCGGAACTTCACGCGATCGGCAATGGCGCTGACTACGTCCGCACCCA  
CGCGCCTGGAGATCTGCGAAGCGCAATCACCTTCTCGGAAACCTCGCGAAATTCGCAGTCGCGACGCCAGAGACCGAGG  
GTTAGATCATGCCTAGCATTACCTTCCGGCCCGCCGCTAAATATCTCCTTTTGGGTTGTTAATAAAACATCCAATAAGTTGACT  
GTGCGTGAAAAAGAAAGTTTTGTGTGATGGCGTTGAAGATCGCACCGTTAAGCTCTTATGTGGGATGGTGCAGAGCTCGACG  
ACTACCGATAAAACGCAACCGCCGCAAACAGACAAGAAAAAGCCCCAACTGATAACAGTTGGGGCTTCAGTATTGTGATTGG  
TGGAGCAATAGCACCTGAACCCAAAACCTTCTCGCTCAACCGGTAGTGGCTGATAACAACCTCGTGAGGGCTATTGCGGGTT  
AAGCATTTAGCGATGTCTAGGGCCAGACTGGACGTCTGAACGCAAGCCGCTGATACTGTACATAACCACAGTATCAGCGGAG  
GATACCCATGTGCTGGCAAGGAACGCCACGGCGAGTCAATCGCCACTCAAACAACGGTTACGAACGCCACCAACCCGA  
CCAGACGCTGCTCTACCAGCTGGTTGAGCAGCACTACCCAGCCTTCAAAGCCTCACTCGAAGCCCAAGGTCAACACCTGCCT  
CGCTACATCCAACAAGAATTCAACGACCTCCTCAAATGTGGCCGTCTGGAGTATGGTTTCATGCGGGTTGCTGCGAGGATTG  
TCATCACGAGCGTCTGGTCGCCTTCAGCTGTAAACGACGCGGCTTTTGCCCTAGCTGCGGTGCCCGCCGGATGGCCGAGAGT  
GCGGCGCTGCTGATAGACGAAGTCTCCCAAGGAGCCATTCGCCAGTGGGTGCTCAGCTTTCCTTTCCAGCTACGCTTTTT  
GCTGGCTCGCCATCCCAGCTGATGGGCCAGGTCTTGAGTATCGTCTATCGTACACTCTCAACTCATCTGATCAAAAAAGCCGG  
TTACACCAAAGCCTCTGCACAACTGGCTCAGTGACTCTTATCCAACGCTTTGGCTCCGCGCTAAATCTCAATGTCCACTACCA  
CATGCTGTTTCTCGATGGTGTCTATGCCGAAGATGACTATGGCAAGCAACGCTTCCATCGTGTCAAGGCACCCACTTACGATGA  
GCTGAATACGCTCGCTCACACCTCAGCCATCGCATCGCTCGCTGCATGAAAAAGCGTGGGATTTTGGAGCGTGATGCCGAG  
AATACGTGGTTGACTGGAAGAGGGCGAAGACGATACGCTGACTCAATTACATGGTGTCTCGGTTACGTATCGCATTGCCGT  
CGGCCCCCAGCAAGGGCGCAAAGTCTTACCCTGCAAACCTTGCCAGGGCGTGAGGATAAAGCCGACTCAAGCAGTCGAGT  
AGCCAACCATGCTGGTTTCTCGCTACACGCCGGTGTGATGGCCGAAGCGCATCAGCGGGATAAGCTTGAGCGCTTGTGTCGC  
TACATTAGTCGGCCAGCGGTTTCCAGAAAAAGTCTGGCATTAAACCGCCAATGGGCAGGTGCGTTACGAGCTCAAAACTCCGT  
ACCGCAATGGCACCAACCATGTGATCTTCGAGCCGCTGGACTTCATCGCCAAACTCGCTGCGTTGGTACCTAAGCCGCGAGTC  
AACCTCACACGCTTCCACGGCGTCTTTGCACCGAACAGCAAACACCGAGTTCAAGTAACACCCGCCAAGCGGGGCAAGAAG  
CCCGACAAATCGGAAGGTCTCGATACTAACTGGCGTGACAAGAGTCTGCAGAGCGCCACCCGCGCCATGACCTGGATGCAAC  
GCCTCAAGCGAGTCTTCAATATTGATATTGAAGTCTGCGAACACTGCGGCGGTACGTCAAAGTGATTGCCAGCATCGAAGAT  
CCGAAGGTCATTGAGCAGATTCTCAAGCATCTGAAACAGAAAACAGCCAAGGCGAATGCCGCAAGCAGCGTGAGCTGCCA  
CCAGAACGAGCGCCGCCACTGACTCCCAGCCTGTTGATCCATCACAGAGTCGTCTCTTTGACTGACGACCCCAAATCCAACA  
CTGCTCAACACTGCCAACTTTTAAACGGGGCGGTGGGGCAGTTTGTATCTCTCGAGCTATCAGGCTAGAGATTTTACCGCAA  
ATCGAACCTTATTAGAGCGGTTTAGGCTGGACCGGCAGTTAAATTGGGGCTTGAGCGGTAAACGAGTGAGGGGAATTTAG  
GTAAGATACTTCGGATGAGGAGCAAAAAGGTGGTTTATACTTCTATACCCAGTAGTGTTCCTGTGCGGTTTGGTTGGGGTC  
GATGCCCCACTTTGGGCGCGGCGTTGGGCGCCGAAGATGAAAGCTCTGTGTGAAGGCTTGATATTAAGACCTTGATGAT  
TTCAATGCCATCACCGAAGAGCAGATCGTTAGCGTCGACAAATTCAGCTACAAAACCTGCCGCAAAAGTGCTTGCAGGTATGG  
CTGAACATGCCGAGCTATTCAACAAGATTCAATCAATCATCGGGTTCAAACAGCAGGTCACTTCGGGGGATCGTTTTACCGGT  
GAGAAGATCGTGATCACCGGTTTTCGTGACGCGGCTTGGAGAAGCTGATTGAAGCTGAGGGTGGTGAAGTGCAATCATCA  
GTCTCGTCGAAGACCACCATGGTGATCGCGGCATCCACTCCGGATCTCCGGCAAATTGAAGAAAGTGACGATCTCAACA  
ACAGCGGAAAGGCAAATATCAAACCTGATTGATCTGGCCACCTTCGTAAGCAATATCTGGAACAACCAGCATCGACTGGTTTG  
GAGTTTTAATGAGTCACCCACAACCTTGAGCTAATAGTCGCTGTGGATTCTAAGTTGGGATTCGGGAAAGGCGGCAAGATTCC  
ATGGAATGCAAAGAAGACATGGCGCGATTTACGCGGATTTCTAAAGAGATCCGCGTGTGCGTTATGGGGAAACACACGTAT  
ACTGACATGCGTGACATGCAGTTAGAAAAGGATGGCGCCGAGGAGCGAATCAAGGAGAAAGGAATTCTCCCCGAACGCGA  
ATCGTTCGTGATCTCCTCGACGTTAAAACAAGAAGATGTCATAGGCGCTACTGTCGTTCTGATCTTCGTGCTGTGATCAACCT  
GTATGAGAATACCGATCAACGCATTGCTGTCATTGGTGGGGAGAAGTTGTACATTCAAGCTCTTTCATCAGCAACGAAACTGC

ACATGACCATAATTCCAAGAGAGTTGCGACTGTGATCGATTTATTCTGTTGATCCGATCCAGAACAATTTTCACATTGATTCCAG  
TGCCAGCGAGACTGTGGAGGCAACCGTTGATGAGACTCAAGAGCGCATTCACTTTGCTACTTACGTGCGTAACAATCAGTAA  
CGCGCTGGCAGTGGAAGAACAAGAACCAGAAACGAAGCAGACGGTGTGGCCGTCTGCTTCGAAACATCATTATTGGCTCG  
AGAAGTATCGAGAATAACCATTCTTGCAGGACGACATCCAAAACAATACAGAAAAGATAGCTTTGCAGTTGTCCGGAGCCCCTCC  
CCCCAATTATAATGGGATTATTGCTGGGCTAAACAATGCTGTCGCCATGCGTGGGACAGCAAACGTTGAATCGCCATCAAGA  
GCATCCACAGATTTACGTGCAGCCGTCATCGGTTTATGGTGTATAAATGACACCATAGCCGCCCTGAATCAGACTGATAATGCA  
GTCTTACAGGACGGCGAGTTGCAACAACACTTGTGCGATTATTACAACAACACTTATTGGCTGACATCGTTTGTGCTTTTCAGAA  
GACGGCTGCACTGAACGTCAGAAGCCGACTGCACTATAGCAGCGGAGGGGTTGGATCCATCAGGCAACGACGGGCTGCTG  
CCGGCCATCAGCGGACGACGGGAGGACTTCCGCAACCGGCCGTTTCGATGCGGCACCGATGGCCTTCGCGCAGGGGTAGT  
GAATCCGCCAGGATTGACTTGCCTGCTGCCCTACCTCTACTAGTGAGGGGCGGCAGCGCATCAAGCGGTGAGCGCACTCCGG  
CACCGCCAACTTTCAGCACATGCGTGTAAATCATCGTCTGATAGACGTCGGAATGGCCGAGCAGATCCTGCACGGTTTGAAT  
GTCGTAACCGCTGCGGAGCAAGGCCGTCGCGAACGAGTGCGGAGGGGTGTGCGGTGTGGCGGGCTTCGTGATGCCTGCTT  
GTTCTACGGCACGTTTGAAGGCGCGCTGAAAGGTCTGGTCATACATGTGATGGCGACGACGACACCGCTCCGTGGATCGGT  
CGAATGCGTGTGCTGCGCAAAAACCCAGAACCCAGGCCAGGAATGCCCGCGCGCGGATACTTCCGCTCAAGGGCGTCCG  
GAAGCGCAACCGCGCTGCGGCCCTCGGCCTGGTCTTCAGCCACCATGCCCGTGCACGCGACAGCTGCTCGCGCAGGGCTGG  
GTGCCAAGCTCTCGGGTAACATCAAGGCCGATCCTTGGAGCCCTTGCCTCCCGCACGATGATCGTGCCGTGATCGAAATCC  
AGATCCTTGACCCGAGTTGCAAACCTCACTGATCCGCATGCCCGTTCCATACAGAAGCTGGGCGAACAAACGATGCTCGCC  
TTCCAGAAAACCGAGGATGCGAACCACTTCATCCGGGGTCCAGCACACCAGGCAAGCGCCGCGACGGCCGAGGTCTTCCGAT  
CTCCTGAAGCCAGGGCAGATCCGTGCACAGCACCTTGCCGTAGAAGAAGCAAGGCCGCCAATGCCTGACGATGCGTGGA  
GACCGAAACCTTGCCTGCTTCCGACCCAGGACAGAAATGCCTCGACTTCGCTGCTGCCAAGGTTGCCGGGTGACGCAC  
ACCGTGAAACCGATGAAGGCACGAACCCAGTGACATAAGCCTGTTCCGGTTCGTAAGCTGTAATGCAAGTAGCGTATGCGC  
TCACGCAACTGGTCCAGAACCTTGACCGAACGCAGCGGTGTAACGGCGCAGTGCCGGTTTTTCATGGCTTGTATGACTGTT  
TTTTTGTACAGTCTATGCCTCGGGCATCAAGGCGAGCTCAGAGACCATGGAAAGCATGTTCTCGGACTTACGTAGCAACTCGT  
TTCTTTTCGAGGTTGAGCCACCTCCGCGCTTCATCAGAAAACCTGAAGGAACCTCCATTGAATCGAACTAATATTTTTTTTGGT  
GAATCGCATTCTGACTGGTTGCCTGTCAGAGGCGGAGAATCTGGTGATTTTGTTCGACGTGGTGACGGGCATGCCTTCG  
CGAAAATCGCACCTGCTTCCCGCCGCGGTGAGCTCGTGGAGAGCGTGACCGCCTCATTTGGCTCAAAGGTGAGGTTGG  
CTTGCCCCGAGGTGATCAACTGGCAGGAGGAACAGGAGGGTGCATGCTTGGTGATAACGGCAATTCCGGGAGTACCGGCG  
GCTGATCTGTCTGGAGCGGATTTGCTCAAAGCGTGGCCGTCAATGGGGCAGCAACTTGGCGCTGTTACAGCCTATCGGTTG  
ATCAATGTCCGTTTGTAGCGCAGGCTGTGCGCAATGTTCCGACGCGCCGTTGATGTGGTGTCCCGCAATGCCGTCAATCCCGAC  
TTCTTACCGGACGAGGACAAGAGTACGCCGACGCTCGATCTTTTGGCTCGTGTGCAACGAGAGCTACCGGTGCGGCTCGACC  
AAGAGCGCACCGATATGTTGTTTGCATGTTGATCCCTGCATGCCGAACCTCATGGTGGACCCTAAAACCTTCAATGCACG  
GGTCTGATCGACCTTGGGCGGCTCGGAACAGCAGATCGCTATGCCGATTTGGCACTCATGATTGCTAACGCCGAAGAGAACT  
GGGACGCGCCAGATGAAGCAGAGCGCGCCTTCGCTGTCCTATTCAATGTATTGGGGATCGAAGCCCCGACCGCGAACGCCT  
TGCCTTCTATCTGCGATTGGACCCTCTGACTTGGGGTTGATGTTTCATGCCGCTGTTTTCTGCTCATTGGCACGTTTCGCAA  
CCTGTTCTCATTGCGGACACCTTTTCCAGCCTCGTTTGGAAAGTTTCATTGCCAGACGGGACTCCTGCAATCGTCAAGGGATT  
GAAACCTATAGAAGACATTGCTGATGAACTGCGCGGGGCCGACTATCTGGTATGGCGCAATGGGAGGGGAGCAGTCCGGTT  
GCTCGGTGCTGAGAACAATCTGATGTTGCTCGAATATGCCGGGGAGCGAATGCTCTCTCACATCGTTGCCGAGCACGGCGAC  
TACCAGGCGACCGAAATTGCAGCGGAACTAATGGCGAAGCTGTATGCCGATCTGAGGAACCCCTGCCTTCTGCCCTTCTCCC  
GATCCGGGATCGCTTTGCAGCTTTGTTTCAGCGGGCGCGCGATGATCAAACCGCAGGTTGTCAAACCTGACTACGTCCACGCG  
GCGATTATAGCCGATCAAATGATGAGCAATGCCTCGGAACTGCGTGGGCTACATGGCGATCTGCATCATGAAAACATCATGTT  
TCCAGTCGCGGCTGGCTGGTATAGATCCCGTCCGCTGCTGGTGAAGTGGGCTTTGGCGCCGCAATATGTTCTACGATCC  
GGCTGACAGAGACGACCTTTGTCTCGATCCTAGACGCATTGCACAGATGGCGGACGCATTCTCTCGTGCGCTGGACGTCGAT  
CCGCGTGCCTGCTCGACCAGGCGTACGCTTATGGGTGCCTTCCGACGCTTGAACCGCGGATGGAGAAGAGGAGCAACGC  
GATCTAGCTATCGCGGCCGCGATCAAGCAGGTGCGACAGACGTCATACTAGATATCAAGCGACTTCTCCTATCCCCTGGGAAC  
ACATCAATCTTACCGGAGAATATCGTTGGCCAAAGCCTTAGCGTAGGATTTCCGCCCTCCCGCAAACGACCCCTAAAAGCCG  
TTCTCTGTATAAAAGATCAGCTAAATTATGTGATTGCACAATACATATATGTGAGGTTAGCAGTGAATTTGCCTACGCCCGA

AACCTACGATGAACTTCAGAGAGCCTACGATTTTTTCAATGAGAAGCTATTCAGCAACGAGCTGCCGCCATGCCTGATAACGT  
TGCAGCGTGAGAAGCGAACGTATGGCTATTGTTCTTTAAGCGTTTTCGTCGGCCGTGAGAGTGGGTACACGGTAGACGAGAT  
CGCTATGAATCCGGTGTATTTCTCGATCAGAACCATAAAGGCCACGCTTTCAACACTGGTGCATGAGATGGTTCATCAGTGGC  
AATTCCATTTTGGCGAGCCTGGCCGCCGTGGCTATCACAACAAACAGTGGGCGGCCCGGATGGAACGGGTAGGACTAATGC  
CTTCTGATACCGGCGAACCGGGAGGCAGGAAAGTGGGCCAGAGCATGACCCATTATATTATTGCCGGTGGCCCTTTGATATG  
GCCTGTGATGAACTGCTGACAGGCCATTTCCAGCTTTCTGGATGGACAGGTTTCCGCCTTACCAGCCTAAGCCTGGCGCTGT  
GCTAAGCCCTACAGGAAAAGGCTATATTGACGACGAGGAAGATGATAGCGAACACGAACAGGAGGTGGAGGAAGGGCGCG  
ACCCGGTTGAACTCGACGACGAGATCATAGAGGCCATGCGATTTGTAACCCACCGCCTGAAGCACCGGTGAACAAAACAAA  
CCGGGAAAAGTACAGCTGCCCGGTGTGTCATATCAATCTCTGGGGTAAACCGGGGATAGTGGTTTACTGTGGTGGCGAGCAC  
TGTAATAAAGCCGCGTTAGTAGTCTTAAAATAAAGTCCTTTCGGACTTTATTTTTTTCCATTTCCGAGGTCGTGATGTTAAT  
GCTGTACTTTCGCGCTTCTTTTAAAACAGTTTCAGCAAGGCTTGCTGGTATCCAGACCTGAACTAATTTAATGGTTCCCGGT  
CTCGGCTTTAAGAGTGGTGTCTGGTACAAATCCCAGATTGCTTAACGGTGCTGGAAATGTTTTGCTTGGAACGGCCTACTC  
GCGTGGCTACGTCTGATGATTTCTCACCTTTGACAAGCACGGAATAGCCAATATCTGTTGTGATGTGTGCAAAGGAAGCCATT  
TGCGGCAGCAGCTGTTTCCATTCTGTTTCTGAAATCTGTTTTCTGAGCCATCTGTGGCGCCTCCGTAGTTTTGGTTACAGAA  
AGGATATACTCAGAATAAACAGGGGTCAATACAAGTACGATTTTTATAAACTTTATTTTATTGAGGGTGAAGCCCGGTGCGGC  
AGCAGCGCGGGCCTCGATGGTGCCGCGAAGGTGCTGGCGCCATGCTCGGATTAACATGAACCGTGAAGAACTGCGAAAC  
TTGTTTTGCGGTTCTGAGGGGTTGACCGAGCCGCGAAGCGGCGCTGGTAAGCGATGATATGCACATATCCACAGGCATATTT  
TTAAAAGGGGCACTGTTGCAAAGTTAGCGATGAGGCAGCCTTTTGTCTTATTCAAAGGCCTTACATTTCAAAAACCTGCTTA  
CCAGGCGCATTTCCGCCAGGGGATCACCATAATAAAATGCTGAGGCCTGGCCTTTGCGTAGTGCACGCATCACCTCAATACCT  
TTGATGGTGGCGTAAGCCGTCTTCATGGATTTAAATCCCAGCGTGCCGCCGATTATCCGTTTTCAGTTTGCCATGATCGCATTCA  
ATCACGTTGTTCCGGTACTTAATCTGTGCGGTGTTCAACGTCAGACGGGCACCGGCCTTCGCGTTTGAGCAGAGCAAGCGCGC  
GACCATAGGCGGGCGCTTTATCCGTGTTGATGAATCGCGGGATCTGCCACTTCTTCACGTTGTTGAGGATTTACCCAGAAAC  
CGGTATGCAGCTTTGCTGTTACGACGGGAGGAGAGATAAAAATCGACAGTGGGCCCGGCTGTGACGGCCCGGTACAGA  
TACGCCAGCGGCCATTGACCTTACGTAGTTTTATCCATGTGCCACGGGCAAAGATCGGAAGGGTTACGCCAGTACCAGC  
GCAGCCGTTTTTCCATTTACAGGCGCATAACGCTGAACCCAGCGGTAAATCGTGGAGTGATCGACATTTACTCCGCGTTACAGC  
AGCATCTCCTGCAGCTCACGGTAACTGATGCCGTATTTGCAGTACCAGCGTACGGCCACAGAATGATGTCACGCTGAAAATG  
CCGGCCTTTGAATGGGTTTCATGTGCAGCTCCATCAGCAAAAGGGGATGATAAGTTTATCACCACCGACTATTTGCAACAGTGC  
CGGTGCGCCGGGAGTCAGCAGATCGACGTCAACGCCGAGCAGCGATTTTCAGTTCTTCTTCAAATCGCCCAAGTCCAACAACG  
TGGCACCGGGCAGCGCATCGACCAACAGGTCGAGGTCGCTGCCATCCCGGTGCGTGCCATGCAGCACCGAGCCGAAGACG  
CGCGGGTTGCGGGCGCGAAAGCGGCCTACCGCTTACGCACTGCGCTTCGCTTCATGTCAAGCACAAACAGACGGTCCGATG  
CGCATCCTTTCTTATCGAAACTCGTTGAGATGATATGCAATCAAGAATAGAATTTCAAGAACTCACAAAGTAACGCGGTGGTTA  
ATATCCTGTACCCACGGATTGCCCTTAGCGCTGCCTATATCGGCTAAAGCACTCCGGTAGCTTGATTACCCACGGCCACGGC  
AGGATCTTGCCGTCGCAAGCGCCAGGGGAAAATCTTCAGCTGCAAGCCTGAGTGATTTTCATGTGCGTGTAATCCATCGCCC  
AGATGATTTTTGTGAAGAAGAACTCGCGCTCGTTTCATGTCCGGGCGCGGCTCCTGGCCCTCCGTGCCAACGGCCAGCAAGTA  
ATCGGCCTGAATTGGCAGTATCAGCGCGGTAGTAAGTCATGGATCGCCGTTGCGGCAGTCTGCGCGCCAGATTAATTACCC  
GGTGAACCTCAGTTTATCCTGCTTGCCTGCTGCGTCTGCTCCATCAGATTTTCATGGCCCCCTTCTTCATGCTCATGCTCATGG  
GTGTGTTCTTTTCCGGTATGGCTCTGTTCCGCCTGAGACGTCTGCGGCATGGCGTAATCGTCGTAATGCTGCTGTCAAAGTCG  
TAGTCTGATGCTTCGGCATAATGCTCGTAATCGGCATACTCCTGCGCGCTCCACTGCTGATCGTCCGGCAGCAGCATAATCATGG  
GCCAGCTCTGCATCATTTTGTGTGCTTCATGACGCCGAGGCCAACGGAATCATCCATAGGGTTCTGCTTAAGATGAAAGGC  
GTCCTCTGCGTTGCTCACCGGCTGATAATCAGTGCCGTTGTCATGTTATGTTTCATCGGGTTTCTGGTTAAACGCCATGCTTTCC  
CCCGTGGCTTCTGGCAGACCTTTTTAGCTGATCGGGTTTCTAAACTGGTATCGCGGCCAATATCCTTAAACCTGGCCTCAAGC  
CCAAAGAAACGGTCAATTTCTGCGGCCGTGGTTTTCGGGCTGTGCGGGCTCACGCTCGATGCCAAAGATTTTTTATCGTCCGT  
AAAAATTTCCACCTCATGACGCGCACGCGAAATACCAACATAAAAAACGTCCTTAGAAGTGGTAAGCGATTTGGTATCTATGTT  
GAACAACACGCGATCACAGGTAAGCCCTTGGGATTTGTGGACGGTGGTTGCATAAGCATAGGAAAGATAAGAAGCCTGTTTT  
TTGTCCAGCTCAACCGTGCGCCCTTTTTGTCTCAAGCGTCAGTTTTTACCCTCCACGGTTTTTACCCTGAAGCGGTCCGCC  
GTTGGCAACGTCCAGCGTTTTATCGTTACGCGTTACCATAACCTTATCGCCCGGCGCCAGTTCGGCGCTGACTGCCTGGTATAC

AGACAGCTTGGTGTGTGTACGCGGGCTGAAAGCGATCTGCTCACCGCTGCTGCTTTCAACCGTCAATTTGTTGCCCGGCCG  
GTATCAAGAACCTGGTAAGACTCGCCCCGCTTCATACCATTTTTGTAATCCTGTTGCGGGATAATGATTTGCCCTTACTGAAAT  
AACGGCTGTCGCGGCGTTCCGCCTGTGTGAATCCACGCGGTCAAGTAGCGTGAACGTTTTCGCCGTTCCGGCAAGCCCCA  
GATTGCCCGGATGTAGTCATTGAGGGTTTTGCGTGAGGCGTTTCGTACCAGAGATTATCAGGGTGGCATCCTGTTGTTCTGAG  
GACAGAGACAGGTAGCGATCGGCAAGTTGAGCGAGTCGGGGCGCTTCTTCCTTCAGTTTCGTTACGCCGGTGATATTTTTCA  
GGGCGCGCGCGCATTACCTTCAGCGGCATACTTAACCGCCTCAAGCAAACTTCATTCTTCTGTGCTGAATGTCTTTCATGT  
AGCTGGTCTGCATATCTGCTTAAATCAGCTGCTCAAAGGCTTACCGGCTTCTACCGCTTTCGTCTGTGACGTATCCCCAGGA  
ATACCGCGGAGCGTTATGCTTCTCGATCACCTCCATCAGCTGTTTCATCTGTGCGGGCGGGTATAACCCCGGCTTCATCAATGA  
ATACGACTGATTTTTTCATCCAGCTTTTTATCCTTCGCTTTGAGGAAAGCGGCAACGGTGCGGGCCGGTAATCCATCATCTTCAA  
GCGCTTTTTTCTGTGTCCCATAGGGGGCCAGCGCCGTGACCTTCAGCCCTTGTGACTCCAGCAGCTCTTAGCGGCCATCGTC  
ATATAGCTTTTACCGGTACCGGCGTAACCATGTGCGGCCACAAACCGATCTTTGCTCGTCACAATTTCTGTAACCGCGCGCATC  
TGCTCCTTCTGAGGGTTTTCCCGCAAGCAGCTGGCCTGCAATCTCTGCGGTGAGCTGTGCGGCATCTGCCCCCGGCCG  
GTGATTCGATAGTCAGAATGGAACGCTCAAGGCGAATACCCTCCACGGTAGTGACGCGGTGGCTGGTCTTTTTAAGCCTGCC  
GTTTTTAATACCATCATCTACCGCAAAACGGGCTTTATCCGCACGCATCCCGCTATTCGTCAGCGAGTCGATCCACTCTTTCGCG  
GTCAGAGTTTTCGGCCATAACTGAAGCACCGACCTTCAGAGTTGATTGATACCGGGCTTCGCCCTCGATGATGGCGCCCTTCTG  
TACCGCCTTCAGGTACGCTTTTTCAACATCGGCTATTGTGGCATGGCCAGCACCTGCTTATTAGCGATTTGAATCAGCTTCTG  
GCGTTCAAAGCTGGCATCGCGCTCTGACAGCGACTTAACTGCAAACTGGATAGCCCGGTCAGCTTAACTCCGGGCTGGTA  
AAATCCGGGGCCATGTTGCGCGCTATATCAGCCTCCAGAGGTTTACCGTGTCCCTGCCATTCACGGTTATCAAATCAATGCCG  
AGCGTTTTGCGCGGCTGGCCATTCCCTGGTGAATTTCTTCACGGGAATGCTCTGTTTTCTTTTCACGCGTAGCCATCGAGAC  
GCGGCTTTTCGTCTGAGCATCGGCGTTTTCCCGCGTCAGACCCATTGCAGCGAGTCCCTTTTCAATTTGCTCCGACCGGCGG  
GAAAAAGCGGAATCTGTTTCATCTGAAAAATGGGCCATATCGAACGTGTTATTTTTGCTGTTGTAACGCAGCTCATAACCGGCT  
TTGGTCAACTCCAACGCCAGCTCCTGTTTGAAACATCGCCAGGTGCATTTTGTACGCATCAGCTCATATTTTTGAGCGCG  
CGCCACTGGCCGTCTCGCGCTGGGTTCATGTTTCATGACAAAAGCGTGTGTGTGCAAATCAGGATCTAGCGCCCTGGAAGTTT  
CGTGGCGGAAAGTAGCGACGACAAGGTTATTGGTATTCTGGGTTACTGATTTCCCTGGCGAGTCGTCCGGGCTGCGCGAG  
TTTTTCAGCTTCACGCACAGCAGCGGCAACAGCTTTTTTCATGAGCCTCGATAATGGTTTTATCGCCGTGTATCAGCGCCTGCAT  
GGATAACCCCTTAGGCGCTGAAAACGTGAGGTGCTAGCCAGACGCTTTTTTTGGCATCACCCAGGTGTCGCTGCATATGCG  
TGAAGGTATCTATCTCTCCGACAAGCAGCTCTTAAACCGGGCTGATTCAACGTCCCCGGATAAGCCGAGGGCTTCAGCTCCG  
GTTCCCTGCCAGGACGTGAATGATGAATCCTTACTGTAGTAATCATCCTTTGCATCAGAGTAGTAGCCACAACGCTAGTGACG  
TTCTGGCGGTAATCGTGGTTATATCAAGCATCAGATCTCCCTCAGTTCAATGCCAGGAACAGGGTTTTTTCGATGGTATTTAA  
CGTGTTTAGCCTTGAAGTTAGCGACGGGCATATCACCAGGCAACGCCAGATAGCCGGTGAGGTTTGGCAACATTGATATTTTCG  
GTAGGCGTTACGGCACGAACAACCTTAAACGTGCGGGCTTTACGGACAATCCAGGGCTTCTGAGGATCGGATTCTTACGCT  
CAACTTCGCTTCTATCTCACCGAGTGAGCGCGACATTTGATCCAACGTTTCATCACCGAGACGGCTGCCGCCAGCACGATG  
TTAGAACGCATGTTAGCCAGAATTGTCTGAGCCATATCCCGACCATAAACCTTAAACAGCTGAGAATAGGTTTGTAGCCAGCA  
TAAACACACAGACCGCTTTTACGCCCTTTGGTCAGTGCATCGTTGAGGTTTGGCAGAACTGGAGTGATTCCAGCTCGTCAAT  
AAATACATTAATGCGGCTTTCTTTTTACCCATAACCCAGCACGATAGAAAAAATCGAATCCAGCCAGCAGGAAATTAGCGGATT  
AAGTGACTTTTTCATTTCTTCTGCCAGGTGATAAACAGGGTTCCCGGCTTTCCATCATCAAGCCAGTCACGCAGGGAAAAAT  
TACCTTCCGGCATTTCAAATGTGGGGCAAGATTCTTACTGAGAACAAATCGCGCGCTTCCAAGTCTTTTTTCAGACCCGGAA  
AAAATAGCTTCGGCAGGCGTCCCATTAATAATTCTTTAATTTTTCTGGTCAACGTTACAGGGCCAGTGAATAACTTCTTCC  
ATAGTTACTGTGCTGTATAGGCTGTGAAGTTTTTTCGAAACTTCACTAAAAATAAGACGGCCATAGCCGAACCATTCTTCAGTA  
GCCATATCAGGGCTTTCCTGAACAATAGAGTTCACTAAACGCTCGTAATCATATGAACGGCGAATTTTCATTGAAAAACCCAG  
CCTTCAGTGCGTTTATCATAGGCGTTTTAAATAACATCGCCGGGACGATAGAAATCTTTAAGAACCCCCATTTGGATCTAAA  
GCAATATTTTTGCCGCTTAATGATGCTCTTAAATAACAGTTCATTGAAAATTGTGGTTTTACCAGTACCGGTTGTACCGGCAA  
TCGAAAAATGCAAGTTCTCAGCGTATGTAGGTATGGGGATATTAGCCACGGTAACTGGTTGACACCTTTTCGCGTGTTTTTAT  
CAGCGAGTGTCTGGCGCGAACAAGCTCTGTACCACGATAAATCTTTTTGAATCTTTCGCTTTAAACACGCGTGATTTATCAT  
AAATGATAAAAGCGATCAGACCGCCAACACCAATAAACAGCCAGCAATTAAGCTGACCATAAAGGCCATAGCGAAAAAGT  
ATTCTTAAACAGATACGGAATCAGGTATTTAGCCGTGGATGGATCAATACCGTAGGTAATTTTGCAACTAGAAACCATAACCATC

ACTGGAGGCAAAGTAATTGCAAATAAAAATGCTAAGCCTCTTTCTCTATCGTCCATTTAGCGCTCCTTTTTTGGTTCCCAGAC  
TTTGTAGCCGTTACGTTCAACCTCTGCTTTTGCCGCTTTGGTTTTGCCGGTTCTGCTATCGAGCGCAGGAGGATTAGCGTTTC  
AATAGCGAGTGATTATGCAACATCATCTGTCTGCCGGTGGGAATTTTACGCCAGATAGCGTTTCGGTTATTGCCTTCAGCTC  
ATCGCGCAGTGGGCCAAAATCCGCATCTGAAGCACGGTCAAAAAGATAATCCAGTTTGCGATTTACGTCGCTCAGCCGGTCG  
GCAACTATTTTCAACCCGACTCCCGATCACCTGGGCCAGCTTCAATGCAGCGCCGAGATAATCTGACCGATTACCTCCTGA  
AACCAGGTCTATATAGGCCAAAAGTTCATCTGATACTTTTGCGGTTATTATTGGCATTACAGTCCTCACATTGTGCATTTCTTAAAC  
AAAAAATTGGGATCTAACAAGCTGAAATCTTAGTATTACCAAAGTAATAAAGCAAACCTATTATAAAACAATGGGTTATTGGGT  
GTTTTTAATACCTAATTATTACCGAATATTGACGCTATTTATTTTTTTATCTTTTAAATCAGTACGATAGCGTGATTTATCGCGCTGC  
GTTAGGTGTATAGCAGGTTAAGGAAAAAATCATCTTTTTTGGTAGGAGCGACCTCCGTAGGTTAAGGGTCATTTGGCTAAA  
AAGCGTCCTATTCTTTGATGGTCATGCTTGCATGACCATCTGAGCAACCAAAAACACTACAGATAAACTACAGAGAACTACAGAT  
AAACTACAAAAACGATTTACCTTAGCGTTGTCAGACTACTAATAGACTACAAGGAACTACAAAGAACTACAAAGAACTA  
CAAAGAACTACAAATAGACTACTAAAACCGTGGCAGACTACTAATAGACTACAAGAACTACAAATAAACTACAAAACCTGG  
ATTGACCCCTTCTTACGAGTGTTGTAGAGTCATCTTCATACAACGGAGGGGGTTATGAATAAACAGCAGATCTGAAACCCCG  
CAACTTATCGGCTGCTGTCAGATTGCGCCTAAATGAAATCGAGAAGTGGCTGGACAGAGGGCTAACGCGGCATGAAATTGCT  
GAAATCCTCGACAGCGAATACAGCTTTTTCGGTAACAGCCAAAGGGCTTGAGATGGCACTGTATAGAACGCGGCAAAACCGA  
AAAAATGTATTGCACAATACACATGATAAGAGTAGCGCGAAGGGTGCAGCGGAAAGTGATTGCACAATACACAACCGTCTG  
AGCCTGAAGCGCAGGAAAGTGAAAAAGCAGAGAGTCCCGGCATTATTGATAAAGAGTTCTTCAATAAAATCGGTGAGGATTT  
CAACCCTAAGAAGTTCAACAAAAAATCTGAGGTGATTTATGAAAGTAGCGGTAATTAATTACAGTGGCAGTGTTGGTAAAC  
ATTAATTTTATCTTACCTGTTAGCCCCGCGCCTGACTGGTGCAAAGTTCTATGCGGTAGAGACTATCAACCAGTCTGCTTCCGAT  
CTGGGTATTGAAAATGTGACCAGTTTTAAAGGTGACGACTTCTCACGTTTGATTGAGGATATTGTTTTTGAAGATGCAGGCAT  
TATTGATATTGGCGCGTCAAACGTTGAAGCGTTCCTGATGGCTATGTCTCGCTTTGACAGTGGCGGAACGAATTTGATAAATA  
TGTAATCCCGGTGACGCCGATAATAAGGCGATTGATGAAAGCCTGAAAACGGCACACACGTTAAGTAAAGCGGGCGTGAG  
CAGCAAGAAAATTATCTTTGTTCCAAACCGTATTAGTCCAGACAGTGAAGTAGAAGATGTGCTGGCGCCGGTGTGTTGAGTTTG  
TCAAAGAAACGAAGATTGGCAAATAAGCAAGAAGGCTGTTATTTATAACAGTGAGTTTTTGAATATCTGGCGTTTTACCCTG  
ATCTCATTCGAAGTATTGACCGCTGAAGATCCAGAAGAATTCAAATCCCGTGCAAAACAACAACCGATGCTGACGAGCGCA  
AAAAACTGGCACGCCGTTATACATACATGAAACAGGCGATTCCCGTAAAGCTAATCTCGATAAAGCATATGCGGCTTTAATGG  
GAGAATAAAATGGAAAAGCAGCCGGATAAATTAGAAGTTCTGATGGACTGGTTTTTAGGTGACGCGAAGGAAATCACCGCA  
ACTCAGAAAGAAATGACGCAGAACTTTCTGAGCTTTTCGAAAAGCTGGCAAAGACACCGAAAGTTTAGGAGAGACGGC  
AGACTCTTTTAAACGGGCTTTAGTAGAAAACAGCGTTCAATTAGCCTGGCAATTAGTGATGATGCTAAGGCGCGGAGGAA  
TTTCTAACTAAATCCGCCGCGCGCAGGCGTCCAGTGCTGAGACGTTTACCCGTGAGATCCTTTTTTATTACAGCTGGCTGCACC  
ATCGTGGGCGCCGCGAGTAGGCGCCGCGATAGCGATACTTTTACTGAGATAAAGCAAACCGGGCGTGTCCCGGTTTTTTTTGTC  
AAGCGGAGCGCGGAGGCCGAAGGCCGGAGGCATTAGTGCCGCCGCCGCGTAAGCGGGGCGAGACGGGAACCGGCTC  
GAAGCGCAGCACGGCAGAACGGCCCCGAGGGGCAATGCCCGTTTTAATTCATCGTGACAGTCGCGCGTGACCATCACGGG  
GAGAAAATAATGAATGACCGACAGCGAGAAGTGGCCCGTATACGCCAGGCCCGCCGCGCGCGGCTCAAGGAAGAAG  
GCACAAGCGTGACAGTCACGCTAACAAAACAGGAAGAAGCAATGTTGCAGGAGCTGTGCCGGTTTCGCCGTCTGGACGA  
ACGCCTTATTCAACGAACGAATTTTTCCAGCTGCTGCTTATCCGCAACTGGCAGCAGTGGCAGGAGCAGAAGGCACAGCTGG  
GAAAATGCCAGGCTTGCAGAAAGCTGAAAGCGGAGGGGGGGTGCAGGGTGAACGGAAAGGCGAAACCTTTAACTGCTG  
GCTTGCCGTGCAAGCCAATGAACTAAATTTGTAGTGTATTGTGCAATACACATTTACACAGAAACAACAAACCGGCAATTC  
CTGGAACCGGATACCTACGGCTATTCTGGGTGAACGGTACTTTTTTGCACCTGGGTGCGCTGAAAAAGCTGAATATGCAGGG  
TGACGTTTCGCGTGCTGTTCTGCTTTGTAGACTGAATGCGCCAGCTATACGCTGACTGCTTAAACCTGGTAAAGTTCTGCAACC  
GGCACTGACCGGAAAGCAAGGCAGGGAAGACCTAAGCCAGAAACCTTGACTGCTCCCCGCCCTTCAGGGCGGGGATTGCG  
GATCATGTTCTTCTTTTACAGGATTCAACGCAGACAAGAAAGGCTTTCAATTTCTATACGTGAACGGCCGCGCAGCGGAAA  
GAAACAAGCCCGTCAATCCGGGCTTGTCTTTTAGGCGGCTCAGAAATCGCTAAAGGCCCGGCTTGCCGGGCGAGTCAG  
TGCTATTTAGTTTGTGTCAGCAGCTGGCTTAATTTTTGCCGCCAGTGCATACGTGATTGAAAGCGCCTTGACGGCGCTGATT  
AGGCAGCTGGTTGAACGCTTCGAGGCAGGCGCGCAGCAATAATCTTTCTGAGATTCGACTTCTTTTTTTCAGTTGGGAAGGG  
GTGGTAACTGTAGTCATGCTTGTCTCTTAGTGAGCCGATATCGGCAATTTTTCGGGTGCCGGTGTGCTCCTCCCGATGATTAAT



TATCGGTGATTATGCTTTTAAAGTCAATACAGGTACGGAATTTATTTACCTGTTTTTATGCCCGTCAGGGCATGGAAGGCGACC  
GCGCCGACTCCACCGGACACCGGCCGCAAATCGCCGAAACTGCGGGACTGACCGGAGCAACAGGCCAACCCCCCTCCC  
TGCTAAGCCATAACCCAGCCCCGCCACGCAGCTGCCGCAGTCCCCACGGGGTGCAGTGGGCGCCGCGCCTGC  
GCGCGGTACGGCGGCCCGCTGCGGGTTCGCGGCCGCTACTGCGAGTTAGCGGCCGCCGCGCGGGCCTTACGGGGGA  
CACCGCACAGTCACGGCCAGTGCCCCGCTGAGCTGCACAATCCACGATAACACAATAGCGCACTGGCAAAGGATGCCGAC  
GCCTGAAGGGCGTGGGCACCCCGAAGGGGCGGGGCGGCCGCTTGCGGCCGGGCGAGTCCGGCGCAGGGTGTGGCCTGC  
CAAGCGGAGCGCGGAGGCCGAAGGCCGAGGGCTTAGCGGCCGCTGCCCGCTAAGCGGGGCGAGACGGGAACCGGCT  
CGATGCGCAGCACAGCAGAGCGACCCCGAAGGGGTAACGCCCGGTGTGGCATCAGGATTTAGTGCAATGGCAGAACATGA  
GCTGGAGAGATCACCGGCAAGCAGCAGCAAAGGGGCGGCACAGCCGCCCGATGGCTGTTTGGCGATACCGGCGATTAAT  
AGAGCGGTGTTTAAATATCCCCGCGTTGCGGGGGACTAGGTTTCAGCAAGTCATGTAAATACGTGTCCATCATGTAACTGA  
AATCCCCAATAAACAGATCCCGCGCATAGGCTACGATGTCAAATATCGGGCTACGGATTCCGGAATATCATTAGTAGACCGC  
TATCATTAGGTATTCTCTGCAAAGTTTCTTCGTCCTTAGCTTCGCCATATAGGCATCTCTAAACAGGTCGAAATCAGTGCT  
ATTAAACAGATCAACAAAGGCCACAAACGCCGCTTCGTTACCTTCTCGCGGGCTTGTTTAAAGCCGTTAATAAAATCCAGT  
TGATATGGCACTCTGACGCCATACCAGACGGAATACCCTCCAATCTTGGAACATAAATCTGGATCAGCCTCATTTGCGTGTA  
ACTCGCGGCAGCGCTCGTAAACTCCTCTGAGCTATCAAATCGGTCAGATCGAGCCAGGCTCCCGCAATGCTTCCGCAGTTG  
TATTTATGGTAAAGTGCCAACATAACAGAAGGGGTCGTAATATCAGTCATGGTGTACTCCTTAAAGCGCCGATACCGGCAATTT  
TTCGGGCGGCGGTATTGCCTCCCGATGATTTAATTATCGTTGATTATGCTTTTAAAGTCAATACAGATACGGAATTTATTTACCTG  
TTTTTATGCCCGTCAGGGCATGGAAGGCGACCGCGCCGACTCCACCGGACACCGGCCGCAAATCGCCGAAACTGCGGGA  
CTGACCGGAGCAACAGGCCAACCCCCCTCCCTGCTAAGCCATAACCCAGCCCCGCCACGCAGCTGCCGCACGTCCCCAC  
GGGGGTGCGCAGTGGGCGCCGCGCCTGCGCGCGGGTACGGCGGCCCGCTGCGGGTTCGCGGCGCCGTAAGTTCGCGAGTT  
AGCGGCCCGCGCGCGGCCGTTACGGGGGACACCGCACCGTCACGGCCAGCGCCCCGCTGAGCTGCACAATCCACGGATA  
ACACAATAGCGCACTGGCAAAGGATGCCGACGCCTGAAGGGCGTTGGCACCCCGAAGGGGCGGGGCGGCCGCTTGCGGC  
CGGGCGAGTCCGGCGCAGGGTGTGGCCTGCCAAGCGGAGCGCGGAGGCCGAAGGCCGGAGGCGTTAGCGGCCGCTGCC  
CGCGTAAGCGGGGCGAGACGGGAACCGGCTCGATGCGCAGCACAGCAGAGCGGCCCGAAGGGGTAACGCCCTGTGTGG  
CATCAGGATTTAGCACAAATGTCAGAACATAAACTGGAGAGATCACCGGCAAGCAGCAGCAAAGGGGCGGCACAGCCGCC  
GATGGCTGTACTTGTCTTTGTGCGTAGCACTTTGATTAGGCCGTTACGGCCGTAATCAGAGCGGCCAGCGAGGTGATGAT  
TTGCGGTAGGTTTTCGAGGATGGTAGAGGTACATATAGCACCTGTAGAGAAGTTGGCGGGGTGTGTTTTCCGACGGCCGACT  
GTAACCGGGCGAATAAGGCAGGTTGTCAACAGCTTGTAGCGAAGCGTCTGTTGACAACCTGCCGCGCCCGGTTTCACTGCGG  
TCATAGGCGGAACGACCCACGCCAACGGAACGGCTTTATGACCGGGCAGCTGAGATACCGGCGAACCTGGCTGGCGGCTGA  
CGCCAGCCGCCAAGCGCCAGCGCGGAGGGCAAAGCCCGGAGGCCAAGCGGAGCGCGGAGGCCGAAGGCCGGAGGCCG  
GAGGCGTTAGCGGCCGCTGCCCGCTAAGCGGGGCGAGACGGGAACCGGCTCGATGCGCAGCACAGCAGAGCGGCCCG  
AAGGGGTAACGCCCGGAGTCTGCCGCTGTTTATCTCTCGTTCCATCTGAAATCGGCGGTAAGGCCATTAAGGGGTCAGTTTA  
TCAGGGAGGCGTTAGCCCCCATGTTGTTAATCATCAGGCAATATCGTCTTTGTAGCAGGCATAACCGAAGCTAAGCTCTGTTT  
TCATATAGTGGCGGGCAAAGTCCCAGGCATCGTGGCCGAAGTCTCATAATCTGCCAGGACGATTTGCGGGGCTTTGTGCCAT  
TGCTGTACGGAAGAAAGCGGCAGAACAGGGCAGGGTTCGACCAAGTCAGTGACGGTGTGTCAGATCATATCTGCCAGACG  
CTCCAGGGAGCCGTAACCCAGCTCTGTGCGCAGATCCGCCACCATGCGTTGTTTACGCAGTGATGCCAGATAATCAATCTCTT  
TGTTTATATCAGAATTTAAGCGGGTCTGGTAATCCATGATGTACTCCTTTGCGCGCCGATACCGGCAATTTTGCGGGCGACGGT  
GTTGCCTCCCGATGATTTAATTATCGGTGATTATGCCCTCAAAGTCAATATAAGTACGGAATATGCATGCATAATTTTATATCTTGC  
AAAGCGTTCATAGAGTGCCTGAATCGCTTTCTGACAGCCTCAATAAAAAAAGGCGGGGATTCCCGCCTTTTTTCTTACAGCTG  
CTTACGTGGCTTTTTACGCGTCATATAACAACGGTATCGCGCAGTCTACCGCTACAAAAAGCACGCCAGCGCGCCGCAACCGT  
ACAGAAACGCAAGCGGCTTATTATCGAAGTAGCTGAAAACCCCTGTCGCCGCACACAGGCCAGAACAGAGACGCAGGCGC  
AGGTGATCTGCACCAGATCCCTGTATCCCGCACGAACGATAAACCAGGGCAGGGCAAGCGCAGCGGCGTAATAATTAATGC  
GAGAGGGACAAAAACGAGATAGTGATAACATGTAACTCCTTGATGTTGCCGATACCGGCGATTGTTCCGGGCGGCGGTATTG  
CCACCCGATGATTTAATTAGAGGTTTTGCGCGTCCAGGAGATTGACCTGAGCCGGGGTAACGTGAAACTTTTTCCCTTTATGG  
ATCACGTTATGCGGGGCGCTAATTTATCACTGATAAAGCTAACCGGGTAACGTTTTTTACCGCAAATCCGCTCGCTAAACCAT  
GCCACTTTTGCCTGGCCGATCCACTGGATGAACAATCACACCGGCCATGCTGCAACCCGTTGCGGGTTCGTCCAGCGTAAT

GCTTACCGGGACTGTATCCCGGTAAAAAACTTAACCGGCGGCACACCTGCCTGCGTAGCGGCTGCGACAACCTGCAAGCCCG  
ATAACCGCTATCCGATTAATAAGCATTTTATTCCCCTTACTCATGCTGATATCACCTTGCCAGCTGTTACCAGTTTACGAAATTCA  
CTTTCATGAATTTACGCCCCATGCTCAAGCGTTGAATACACGTTGCCGATAAGCCAGTTACCAGCCGTTTTTGTCTCGGTATACC  
ACCATGCTTCTGTGAGTAAGCAGCGGTTTCGCTATCCTCGCCCTTCTCATAGATCCAGATTTTAGTGACGTCTTTACCCGTTTC  
GTTGCTGCCCTGAATGGTAGGGTCAAAGGTATGTTCAATCTCTATATCGAAGTAACGCTGAAGGAAGTTAGTAAAGTGCATGA  
CGACTCCTGTAAGCGCCGATAACCGCAATTTTTCGGGTGGCGGTGTCGCCTCCCGATGATTTAATTATCGTTGATTATGCTTTTA  
AAGTCAATACAGGTACGGAATTTATTTACCTGTTTTATGCCCGTCAGGGCATGGAAGGCGACCGCGCCGGACTCCACCGGAC  
ACCGGCCGCAAATCGCCGAAACTGCGGGACTGACCGGAGCAACAGGCCAACCCCCCTCCTGCTAAGCCATAACCCAGCC  
CGCCGCCACGCAGCTGCCGCAGTCCCCACGGGGGTGCGCAGTGGGCGCCGCGCCTGCGCGCGGGTACGGCGGCCCG  
CCTGCGGGTTCGCGGCCGCTACTGCGAGTTAGCGGCCGCCGCGCGCCGGTTACGGGGGACACCGCACCGTCACGGCCAG  
CGCCCCACTGAGCTGCACAATCCACGGATAATGCAGGAGACGAATCATGATAGGAGGCTGAAGGGGAAATGAGCGGCAGCA  
GGGGAAGGGGTTGCCAAGCGGAGCGCGGAGGCCGAGGCCGAGGCGTCAGTGGCAGCTGCCCGCTGAGCGGGGCGA  
GACGCGTAGCGGCTCGATGCGCAGCACAGCAGAACGGCCCCGAGGGGTGACGTCCGGGGGTTGCTTTTAAAGATTTTC  
GACCACATCAGTAAATCGTAGTGACACCATGAAGCAAAAAGTATCGTGCAGACCAGAATCAACAACAGTAACAGCAGACCTTT  
TTTTCGACGTAATAAAACCGGCCCAAAGCGCCCGCAAGAAGCACACTCAACACGATTTCCGTTATACTAATCGTATTCATAAT  
CTCTCACGTTTCCCTTTTTAGAACTCTGCCACACACAGATAAAACCTTATAACAAGCTACAAAACCCGTTATTCAGACGCGGTA  
ATGCCTAGTTTTTTTTGCCAGTATTTAGATGACAAAGAAACCCTTATCCACTTCCCGGTTACAAGGTGAATGATTGTGGCTTCA  
TGCCCTTAAACAGAGTGGGATATTAACCTCACGCTGAATGATATGCGTCTCTCCATCATTCCCGTCACGGCAATTAGGCCCTCTG  
TAGAACAGGGGTTGATACTACTAATGTTGGTGTGTTTTCGGTTTTGTTGAGCATCGCTGATCCTCAAATATCGGTTTGTGTTAC  
GTCTGCCGCTTTCGCTGGATAAGCGACTTAAAGAAATCCGACGCTTCAGAATATCGCTATCCTGGAAGTCGGGAAATGTCG  
CTTCTGTGAGCTCCTGCGCCGTACCTGCCCGTATAACGTTTTATCGCGGATCATCGTTTCGCTTAACGCCATCAGCCTGTTTTTT  
GCTGAAGGAGTGCCGAAAATAATCGCGTATTGGCCGCCGCTATCCTGATGAACAGAAGTATCCAGCGATGATTACCCTGTT  
TACGATAGTGGTGATAGATTTGCTGGCCGTAGCGCTCCTGATCGGAATTACGGTAATCGAACATTAACAGTTCCAAAAGCATT  
ACCGATCTGGCAATTGCCAGGCGGTAGGGTGTGAAAGTGTGCTAACATAGTTTCCCCTGAGCGTGACAGTCACGATAAGGC  
GGGCTTTGCCCGCCTGGTTATCAGTTAATCAATGGCACGATAAATACGATTCTGGCTTTGTTCTCCAGCGTATTAACGTA  
CGAACAGGTGATAACCGGTTAGCCATCGTTTCGTTTCAGTTTCGGCTTTGCCCTTCTCATATGCCAGGCCGAAAAGTAACTGTA  
GGCATAACAGACAAACAATAATCCCTACTTTCGCGCGCGCTGCATTCACCTTCAAATAGTTAGGTAACGAGAGCCAAAGAGGTT  
GGGGCGCTTCCATAAAAAACGCGCCATTGCTGGCCTGAAGGTATCCCAATACCCTCCCTGGTAGTCTTTAGCGTAACGATTC  
AGAAAGGACTGAATGAAGTATCTGCGCTGAAGAAAGCGCCACGAATGCCGAGGCATGAAGTTCATGCGGGCGTTTTCA  
GAAATGTAGCGGGCGGTGATTTGATAGTTTCCATGATACTTCTCTTAAAGCCGATACCGGCGATGGTTAAGCGGCAGGCAC  
ATCACCTGCCACTTTTTAATTATCGTACAATGGGGCGTTAAAGTCAATATAAGTACGGATTATATTTACCTAATTTTATGCCCGTC  
AGAGCATGGAAGGCGACCTCGCCGACTCCACCGGACACCGGGGGCAAATCGCCGAAACTGCGGGACTGACCGGAGCG  
ACAGGCCACCCCCCTCCTGCTAGCCCGCCGACGCGGCCGTTACAGGGGACACTGAGAAAACAGAAAGCCAACAAC  
ACTATATATAGCGTTGTTGGCAGCTGAAGCAGCACTACATATAGTAGAGTACCTGTAAAACCTTGCCAACCTGACCATAACAGC  
GATACTGTATAAGTAAACAGTGATTTGGAAGATCGCTATGAAGTTCGATATTTTTGAAAGCTCCGGCGCCAGCCGGGTACACA  
GCATCCCTTTTTATCTGCAAAGAATTTCTGCGGGGTTCCCCAGCCCGGCCAGGGCTATGAAAAGCAGGAGTTAAACCTGCAT  
GAGTATTGTGTTGTCACCTTCAGCAACTTACTTCTACGGGTTTTCTGGCTCGTCAATGGAAGATGGCCGCATCCATGATGGT  
GACGTAAGTGTGGATCGCTCGCTGACGGCCAGCCACGGCTCAATCGTAGTCGCCTGCATCCATAATGAATTTACCGTGAA  
GCGGCTACTGCTGAGGCCAGACCCTGCCTGATGCCGATGAACAAAGATTTTCTGTGTACTACATTGACCCGATAATGAGA  
GCGTTGAAATCTGGGGAGTGGTTACGCATTCCCTTATCGAGCATCCGGTATGTTTGCCTGATTGATGTCAATGGCATGTACGC  
CAGCTGTGAGCAGGCATTTAGGCCAGATCTGGCAAACCGAGCAGTGGCCGTTTTATCCAACAATGACGGCAACATTGTGGCC  
CGTAATTACCTGGCGAAGAAAGCGGGCCTGAAAATGGGCGATCCGTACTTCAAAGTCAGACCATAATCGAGCGTCATAACAT  
CGTATTTTTAGCTCTAATTACACTCTCTATGCCTCCATGTCGGCCCGTTTCGCGGCCGTAAGTTGAGTCCCTTGAAGCCACGTC  
GAACAGTATTCAATCGACGAGCTTTTTGTTGACTGCAAAGGGATAACGGCCCGCATGAGCCTTGACGCTTTCGGGCGCCAAC  
TGCGCGAGGAAGTCAGGCGACACACAACGCTGGTATGCGGGGTTCGGTATTGCCCGTACTAAGACGCTGGCGAAGCTGTGTA  
ACCACGCTGCAAAAACATGGCCCGCTACTGGCGGGGTGGTTGCTCTGGACGATGGCGCCAGACTGAAGAAATTAATGAGCA

TCCTGCCGGTTGCGGAAGTCTGGGGCGTCGGCCATCGTACAGAGAAAGCACTCGCCACAATGGGGATCAAAACGGTGCTGG  
ATTTAGCCAGGGCAGATACGCGCCTAATCCGTAAAACATTTCGGCGTTGTGCTTGAAAGAACGGTACGGGAGTTGCGCGGCGA  
GGCTTGCTTCAGCCTGGAAGAAAACCCTCCTGCGAAGCAGCAGATTGTTGTGTGTCGCGCTCATTTCGGCCAACGCGTAGAAACC  
CTGACGGACATGCAGCAGGCTGTCACCGGATTTGCAGCGCGCGCAGCTGAAAACTGCGTAATGAGAGGCAATACTGCCGC  
GTCATAAGCGTCTTTATCCGTACCAGTCTTATTTCAGTGCGTGATACACAGTATGCCAATCAGGCAACCGAAAACTGACGGTG  
GCAACCCAGGACAGCCGCACGATAATTCAGGCAGCACAAGCCGCGCTGGCGCGGATCTGGCGGGAAGATATTGCGTATGCA  
AAAGCAGGGGTTCATGCTGGCAGATTTTAGCGGGAAGGAGGCCAGCTTGATTATTTCGACTCTGCTACGCCCTTCAGCTGGCA  
GCGAGGCTTTAATGGCTGTTCTTGATGGTATAAACCGGCGTGGAAGAGCCAGCTTTTTTTTTGTCAGGCCAGGGCATCGATAA  
CTCCTTTGCCATGCGTCGTAGATGTTGTACCTGATTACACGACAGACTGGCGCTCAATACCAATAGCCACCATCAAATAATTA  
CCGGCGCCGTACACGGGCCGGTTAACCCCTCAACCGGCCGAAACAAGTTTCGGCACGTTTTTCGCGTTTTTCGGTAAAAGCC  
GTTTTCTCTGTATAAAAGATCAGCTAAATTATGTGTATTGCACAATACATATATGTGAGGTTAGCAGTGAATTTGCCTACGCCCG  
AAACCTACGATGAACCTTCAGAGAGCCTACGATTTTTTCAATGATAAGCTATTCAGCAACGAGCTGCCGCCATGCCTGATAACGT  
TGCAGCGTGAGAAGCGAACGTATGGCTATTGTTCTTTAAGCGTTTTTCGTCGGCCGTGAGAGTGGGTACACGGTAGACGAGAT  
CGCTATGAATCCGGTGTATTTCTCGATCAGAACCATAAAGGCCACGCTTCAACACTGGTGCATGAGATGGTTCATCAGTGGC  
AATTCATTTTGGCGAGCCTGGCCGCCGTGGCTATCACAACAAACAGTGGGCGGCCCGGATGGAACGGGTAGGACTAATGC  
CTTCTGATACCGGCGAACCGGGAGGCAGGAAAGTGGGCCAGAGCATGACCCATTATATTATTGCCGGTGGCCCTTCGATATG  
GCCTGTGATGAACCTGCTGACAGGCCATTTCCGGCTTTCTGGATGGACAGGTTTTCCGCCTTACCAGCCTAAGCCTGGCGCTGT  
GCTAAGCCCTACAGGAAAAGGCTATATTGACGACGAGGAAGATGATAGCGAACACGAACAGGAGGTGGAGGAAGGGCGCG  
ACCCGGTTGAACTCGACGACGAGATCATAGAGGCCATGCGATTTGTAACCCACCGCCTGAAGCACCGGTGAACAAAACAAA  
CCGGGAAAAGTACAGCTGCCCGGTGTGTCATATCAATCTCTGGGGTAAACCGGGGATAGTGGTTTACTGTGGTGGCGAGCAC  
TGTATAAAGCCGCGTTAGTAGTCTTAAAATAAAGTCCTTTCGGACTTTATTTTTTTTTCCATTTCCGAGGTCGTGATGTTATTAAT  
GCTGTACTTCGCGGCTTCTTTTAAAACAGTTTTAGCAAGGCTTGCTGGTATCCAGACCTGAACTAATTTAATGGTTCGCCGTT  
CTCGGCTTTAAGAGTGGTGTCTGGTACAAATCCCAGATTTCGTTAACGGTGTGGAATGTTTTGCTTGGAACGGCCTACTC  
GCATGGCTACGTCTGATGATTTCTCACCTTTGACAAGCACGGAATAGCCAATATCTGTTGTGATGTGTGCAAAGGAAGCCATTT  
GCGGCAGCAGCTGTTTCCATTCTGTTTCTGAAATTCTGTTTTTCTGAGCCATCTGTGGCGCCTCCGTAGTTTTGTTACAGAAA  
GGATATACTCAGAATAAACAGGGGTCAATACAAGTACGATTTTTATAAACTTTATTTTATTTGAGGGTGAGGCCCGGTGCGGCA  
GCAGCGCGGGCCTCGATGGTGGCGGAAGGTGCTGGCGCCATGCTCGGATTAACATGAACCGTGAAGAAGTGCAGAACT  
TGTTTTTCGCGGTTCTGAGGGGTTGACCGAGCCGCGAAGCGGCGCTGGTAAGCGATGATATGCACATATCCACAGGCATATTTT  
TAAAAGGTATTTTATAGATTTTTTATCTTTTTAAAGTCTTTTAGAGCTATATAACTCATTGATTTAAAATCATAAATAAGTGTATCT  
CTGGGAATCCGCCACCTTGTATGGGAATTGGCCACCTTACTATGGGAAACAGCCACCTTACTATGGGAATTAGCCACCT  
TGTTATG

>pQEB1\_ISKpn26

GGAATTGGCCACCTTAGACGAAACTGTAAAAAATGTATTTACTTGTGTTGAACTTTGTGGTAGTGTGGAGAGTAATTTTTAACC  
CACAAAGGCAAGGCGCATGGATAAGTTGCTGAACAAAAAGATAAAAGTTAAGCAGTCTAACGAGCTTACCGAAGCTGCTTAC  
TACCTCTCGCTAAAAGCAAAGCGCGTTCTCTGGTTATGTCTTATGCAGACGATTTTCACAGCTTCAGTAAGCGAAGATGATGAT  
GAGATGGCTGTACTCGGTGACTCTACTTTCAAAGTAAAGGTGGCTGACTATCAGCAAATTTTTCAGGTAAGCCGTAACCAGGC  
TATCAAGGATGTTAAGAAGGCGTGTGTTGAGTTAAGCCGTTCTGCGGTAATCTTTTACCCGAAAGAGGGGGCGTTTTGACTGC  
GTCGCGCGCCCCTGGCTAACAGAGGCTGGCAGCCGATCAGCTCGTGGTATCTGGGAAATCGAATTTAACCATAACTCCTGC  
GGTACATTTACGGCCTGACGAACAGTTCACCACCTACTCGCTCCGCGATTGTGGCAGTCTTCGAAATCCCCGGACGATCCGC  
CTTTATGAAAGTCTTGCTCAATTCAAATCTTCAGGCTTATGGGTTACTACTCATGCTTGGTTAAATGACCGTTTTCTTTTGGCGG  
AATCCCAACAGAAGAACTTGGCAGAGTTGAAACGATCTTCTTGATCCTGCACTCAAGCAGATAAATGAGAAAACACCTTTA

CTTGCTAAGTATAGTATTGATGATTCAGGAAAATTTCTGTTCTCAATAATTGATAAGCAAATCCCGTCTGACATAAATCAGCAC  
ACATGAGCCTGTCATTTGACAAATTTTTGTCATGAAGATGGGCGAATTTCCACACAGCACCGGCGCCCGGCAAGATGGGCGG  
ATTCCCACACGACAGCGGCGCCCGGCAAGATGGGCGGATTTCCACACTACAGCGGCGCCCGGCAAGATGGGCGGATTTCCA  
CACGGCAGCGGCGCCCGGCAAGGTGGGCGGATTTCCACACGGCAGCGGCGCCCGGCAAGGTGGGCGGATTCTCACGCGG  
CAGCGGCGCCCGGCAAGATGGGCGGATTTCCACACGGCAGCGGCGCCCGGCAAGGTGGGCGGATTCTCACGCGGCAGCG  
GCGCCCGGCAAGGTGGGCCGATTCCCACGCGGCAGCGGCGCCCGGCAAGGTGGGCCGATTCCCACGCGGCAGCGGCGCC  
CGGCAAGGTGGGCCGATTCCCACGCGGCAGCGGCGCCCGGTAAGGTGGGCGGATTTCCACACGGCTGCCGCGCCCGGCAA  
GGTGGGCGGATTTCCACACGGCAGCGGCGCCCGGCAAGGTGGGCGGATTCTCACGCGGCAGCGGCGCCCGGCAAGATGG  
GCGGATTTCCACACGGCAGCGGCGCCCGGCAAGGTGGGCGGATTCTCACGCGGCAGCGGCGCCCGGCAAGATGGGCGGA  
TTCCACACGGCAGCGGCGCCCGGCAAGGTGGGCGGATTTCCACACGGCAGCCTCGCCCGGCAAGGTGGGCGGATTTCCA  
CACGGCAGCCTCGCCCGGCAAGGTGGGCCGATTCCCACGCGGCAGCCTCGCCCGGCAAGGTGGGCGGATTTCCACACGGC  
ACCGGCGTGCGGCAAGGTGGGCGGATTTCCACACGGCACCGGCGCGGCAAGGTGGGCCGATTCCCACACGGCACCGG  
CGCCCGGCAAGGTGGGCCGATTCCCACACGGCAGCCGCGCCCGGCAAGGTGGGCCGATTCCCACGCGGCAGCCTCGCCCG  
GCAAGGTGGGCCGATTCCCACGCGGCAGCCTCGCCCGGCAAGGTGGGCCGATTCCCACACGGCAGCGGCGCCCGGCAAGG  
TGGGCGGATTTCCACACGGCAGCGGCGGCGGGCCAGTGGGATTAGGAGAATAGGTGTTTTACCGAATGCCCTGACGAGG  
CGTAAAAAAACCGCTTGGCGGCGCCTCATAAAGCAGAAAACCCGCTCAAGGCGGGTTATCTGCTCTGTAGCCTGTGATGCT  
TCGCGGGCATCCGGCATAACAGCGAGGTGAAATTTCTTTTGGCATGTTAATTATACGCTAACGCGGCATATGATCAAACCTG  
TATTAATAAGCCACTGTACCGTTTATAATGCTCTCAGATCAAAGAGGTAAGCCCGTTTAGCCGCTGTGTGATGAGCCAGTT  
CAGACTCTTCAAATCGAATTTGGTACTAAACAGGACCCGAACCGTGGGCAAGCACACGGCAACGGTATAGCCCTCTTCCGG  
TTTCGCACCCGGAAGCCTGGGCGGCAGCGTGGTAAATTTCTTTTGGTTAAGTGAATGGCATAACCGGATGGGCGGATTA  
GAGGAAAGGGGATTGCCTAGTAACCTACGCGCCACAGAGATGGAGGTGCGGGGAATGATTGAGCTGATTATCGCTATTCTGA  
CCTTAATTGCGGCTGTATTGCAGTTGATCAACTGGTTCCTTAATGGTGCCGAGTCTGTGAAGGTGAAAGCCTGAACGGGC  
AAAACCTGAAAGGTTTATAGCCGTCCTTCGGGGCGGCTTTTTTTTCGGCAAATTAGGGTTTTACCGAATAATGCAGAGTTTTAA  
GGTGAGAATTTGCAGACTTGGCGTTTTACCGAACATAGATACTCCCTAGGCTGATAGGTGCATTAGTTATCACCTACCTGAAC  
ATATTGTAAGATGTCAGTCTCCAGTACTTGTGTACTATCAACTGACAAGACTCTTACACGCAACGCAGGGGGATGGAGTT  
TTATGCTTAGAAAAATAATCAGGGGTAGCGGATTAAGTCAAGTCAAGAAAAACTGATAGAGTTGCTGATGATGCTTTTTTT  
GGTCTTTGGTCTTATCCTAATGTTTATAGCGATGAGGGTTACTCTAAAAATAAAATTGGGAAAGAAGTTAGTGACTTATTAGTTA  
TTTTTGATAAAGATATAATAATTTTTTCGATAAAGCTATTACATAAATAAAAAACAAAGATCCTAAGGTTGCATGGCAGAGATG  
GTTAAAAAATCAGTCATACAGTCTTGACACAGTTATTTGGCGCAGAGAAGTTTATAAAAGATCATCCGAAAGACTTTTTGT  
TGACAAAGAATGCTCAGTTAACCTCCCATTAAAATAGATAATTCTTTAATTTTCATTTGGTGGCCGTCATAATAATTTAG  
ATCCGGCGATCTCGTACTTTGACAAAATAGAAAAAGGCAGCTCTGCTACTTTAGTTAACATATTTCTTTAAACGCCCATCAATG  
TCTAGAAAATCCATTTTGTGTCGGAGACGTTTATCCTGATAAGACTTTTGTCCATATACTTGATGAGACTGCCCTAAAACACTG  
TTAACCGAGTTAAACACAGCAACTGATTTTATTGGCTACCTTAACGAAAAAGAGAGGGTTGTAAGAGAAAGAACATTATTGG  
TCAGCGCTGGGGAAGAAGAGACTCTTGCTGCTTACATTATGGGTGATAAAACCATAATATCAAAGAAATTTATTGGAAACGAT  
CAAGGGATGACCATACCGGAAGGTGAATGAAAAAACTATAAAACCACTTTCAATTATCAATATCAGCTCTCAATGAAAAAGGG  
TAGCGTTTTCTGGGATAACCTAATCCACAACCTCTCGACAAGTATATTGTCAGCTAACGTTGGTTTTTTTTAGTGAAATTGAATTT  
TCTACACATGAATTAGGTGTTAGAGAATTAGCCAAAGAAAGTAGGCAATCTAGATATTACCTTTCAAAGAACTTTAAAGAGAA  
ATTAAAAACAACCTCAGCCTCATTAAGAAGCTCAAGAATGGTCAATCAATCGATGAGCCTGGAAAGTTTTACTTATTCCTTTT  
TTTTCTAACGATAGCAAGTTGAGTTACTCTGATTACAGAATCAACGTATATCTTATATAAATGCTTATGCTGAGGTTGCCTTTA  
ATAAATACAGACATATAAAAAATTAATACTATTGCAACAGAGCCGCAAATAACAGAAGGAAGATCTGAAGACCTAATATATA  
GCATATCCCAGAGAAATTTACCAAAGAGCAAATGAAAAAGCCAAAAGATTATCAAGAGAATACAAAATACTAAGTGATTTT  
TTACCTACTAAAACGACAAAGAGCGATAACTTTAAATCAGTTATATCAAAGGTGAAAAAATAGGGCGGAATACACCTTGCC  
ATGTGGCTCCGGTGTTAAATTTAAAAAGTGCCATGGTGCGAATAATTAGCATTATTGTATGTATAACGGTAATGGCGCGGCAGA  
GAAACCGGCGGTTCTGCCCTAGTGTGGCCTGCGGGTTCCCCGCACCCGCTGTATGTAGTATCGGCAGCATCTGAGAAAA  
CCACTACATGTAGTTATCAGCGCCACAACGGCGCGGGACGAGTGCGGTTCGAAAAATTGGGGTTTTACCGAATCCGGCA  
AAAGATTGCTTCTATAACGTCCGCTTCTGGCACACAGCAGCCGTTAAGATGTAAGGCCTTACGCCAACTAAATCTAATGGGA

CAGATTTAGTTGGTGATGGTCAAGTAATCTGCAAACGGTCACCAAGTAAAATGCAAATGGGTAGTCAAGTCCGATGCAATTAC  
GCACCCGGCAAGGTGGGCCGATTCCCACACGACAGCAGCGCCCGGCAAGGTGGGCGGATTTCCACACGGCAGCGGCGCCC  
GGCAAGGTGGGCCTATTCCCACACGGCAGCGGCGCCCGGCAAGGAGGGCCGATTCCCACACAGCACCGGCGCGCGGCAA  
GGTGGGCCGATTCCCACACGACAGCAGCGCCCGGCAAGGTGGGCGGATTTCCACACAGCACCGGCGCCCGGCAAGGTGG  
GCCGATTCCCACACGGCAGCGGCGCCCGGCAAGGTGGGCCGATTCCCACACGGCAGCGGCGCCCGGCAAGATGGGCGGAT  
TTCCACACAGCACCGGCGCCCGGCAAGGTGGGCCGATTCCCACACGGCAGCGGCGCCCGGCAAGGTGGGCGGATTTCCAC  
ACGGCAGCGGCGCCCGGCAAGATGGGCGGATTCCCACACGGCAGCGGCGCCCGGCAAGATGGGCGGATTTCCACACGGCA  
GCGGCGCCCGGCAAGATGGGCGGATTCCCACACGGCAGCGGCGCCCGGCAAGATGGGCGGATTTCCACACGGCAGCGGC  
GCCCCGCAAGGTGGGCCGATTCCCACACGACAGCGGCGCCCGGCAAGGTGGGCCGATTCCCACACGACAGCGGCGCCCG  
CAAGATGGGCGGATTTCCATATCGACATGTATGTAGCTTGTGTTATCCGTGGATTGTGCAGCTCAGCGGGTCGCTTGTCTATG  
GCGTAGTGTCCCCGTAACCGGCCGCGTGC GGCCGCTAACCGCGCAGTACGGCGCCGCGACCCGAAGGCGGGCCCGCTTCC  
CGCGCGCAGGCGCGGCGCCACTGCGCACCCCGTGGGGGACGTGCGGCAGCTGTGTGGCGGTGAGCGGGATTAGGG  
CTTTCAGGGAGGGGGCTGGGTGCGGCGATACGTTTCAGCATTGCGGTTTCCGGCGATTTGCGGCCGGTGCCCGTTAACTC  
CGGCGTGGTCGCCTTCCATGCCCTGACGGCATAAGAAAATAAAACCGCCATGCTGCGGTCATTCATGATTTTGTGGTGTAGCG  
ATAAATAGTCATGCGAGAAACGTTGAAGCGCTTAGCAACTGCACCAACTGTCATTTTCAGGATCAGCAAGTAAGATTCTAATTT  
GTTTAAACATCTTCTCAGAAAGTGACGGTTTTCTCCCTCCCACACGGCCCTTGC GCGTGCAGCTGCAAGGCCTGAGCGCGTT  
CTTTCAATATTGCGGTTGCGTTCAAAGCTAGAGAATATCGCCATCAGATGAGTATAGATTTCCCTATAACTGGCGCATTTGTGT  
CTATTCTGTCCTTGATGGCTATGAAAGTTATTCCGCGTTTCTTCAGGTCGTCGAGTAAAGTAATGACTTGACCCAATGAACCAC  
CGAGCCGATCTAGTGCCAACTACTAGGGTATCTCCCTCGCGCAATGCTTTTCAGGCAGTTCTCCAGTTCCAGCGCACCTTTTT  
TGTCGCGCTTTGGGCCGCTACGTGAGGTCTGATCCTGATAGATTTGCTCACATCCAGCTTTTGTTAGTTCGTCAACCTGGTGCG  
CCACATCCTGAAGATGCGTAGATTTACGTGCATAGCCGATTTTTCATTCTTTTCTCGCTAATTAGTTATGGGGTTATTGTTATGTTG  
ATACAGTAACGAGTTTTGTTACATGAGGGGAGTCATTTTTCGGGAGAAAGTCAGGACTTTTCAAGACTGTCACAAAAACCATC  
GTTTTTGATACATTAATTTAACCAATAGGTTGCAGATCAAATCGTCTGTAACAGCCTTTCTGGCTGTTTGTATATAATCATGAAAA  
AATGGTGAGTAGAGTTTCAGGGTAACAGGGGATGCTTATGTCGTTTTCCACAACCTGGCTACTTGAGATCGCATGTGAGAATT  
ACTTCGTCTACATCAAACGCCTTTCCGCCAACGATACCGGCGCAACAGGTGGTCAACAGGTAGGGCTTTATATCCCTTCAGGT  
ATCGTTGAAAAACTCTTTCCGTCTATCAACCATACCCGTGAACTGAACTTCGTTTTTCTCACCGCACATGTGTCATCGCATG  
ATTGCCCTGACAGCGAAGCCCGGCAATTTATTATAACAGCCGTCATTTTGGTAAAACCCGGAATGAAAAAAGGATTACCCGC  
TGGGGTAGAGGCAGCCCACTTCAGAATCCTGAAAATACAGGGGCTCTGACGCTCCTGGCTTTCAAGCTTGATGAGCAAGGG  
GGGGACTGTAAGGAAGTAAATATTTGGGTATGCGCCAGCACTGATGAAGAGGACGTCATTGAGACCGCTATTGGTGAAGTTA  
TACCCGGAGCGCTTATATCCGGCCCCGCAGGACAGATTCTAGGCGGACTATCTCTACAGCAAGCGCCAGTAAATCATAAATATA  
TTCTACCTGAAGACTGGCACCTGCGCTTTCCGTCCGGAAAGTGAATTTATTTCAGTATGCAGCCAGCCATTATGTGAAAAATTCCC  
TTGATCCGGATGAGCAACTTCTTGACCGCCGCGCGTGGAGTACGACATATTTCTATTGGTTGAGGAACTGCATGTTCTGGAT  
ATCATCCGGAAAGGATTTGGCTCTGTGGATGAATTTATTGCGCTGGCCAATTCTGTTCAGCAATCGCCGTAAATCCAGAGCCGG  
GAAGTCTCTGGAAGTGCACCTGGAGCATCTATTATTGAGCACGGCCTGCGACACTTTGCGACGCAGGCCATCACAGAAGGT  
AATAAAAAACCCGATTTCTTTTTCCCTTCCGCAGGGGCTTACCACGATACTGAGTTTCCCGTAGAAAATCTGCGCATGCTGGCA  
GTCAAGACTACCTGTAAGGATCGCTGGCGTCAGATACTGAATGAGGCCGATAAAATTCATCAGGTGCATCTGTTTACTCTCA  
AGAGGGAGTTTCTCTGGCTCAATATCGGGAGATGCGGGAGTCCGGTGTGAGATTGGTCGTGCCATCATCGCTGCACAAAAAA  
TACCCGGAGGCGGTGAGAGCTGAGCTAATGACGCTAGGTGCGTTTTATTGCTGAGCTGACAGGGCTTTACGCAGATATTCCAT  
AGATTATCTCCCGCATAAATACCGGGAGGAGCGATCAGATTCTGTTCAACCTTGCACGAATCGGCATTAACCGCTTTCAGGAT  
ATAAGGTTCAAGCAGTTTGGCTACGGCTTCAAACACGGGCACCACTACGGAGTTACCGAACTGCCTGTACGACTGAGTGTCT  
GACACAGGAATGCGAAAAGGCCTGCCATCTACTTTTTCAAACCCATAAGGCGCGCGCACTCTCGTGGAGTCAGCCTGCGGG  
GCCGATGCGCCTGATTTTCTTCGTTTCGCGAAGTCTGTTTTCACCTGTGGCCATATCCAGCCACGGTCTATCAGAATTTAGACC  
CGTCTTTGTGATAGCGAGCAGAAAGCGTACGGGCAATGCTTTCTTTATTTTCAGGATTAACGAGGCCAAAACCGAATCCGTTA  
CCCTTAGCTGCGTGCTTTTTGGCGTAGTTATAGAGATACTCCAGAGTTTCGGCGTCAGTATATATTTGCTGTCAACCACGGGT  
TCCAGCAGTTCGCCAAATGACGGACGCTGTTCCGGATAAAAACGACTAATATCGCGCAGGGTAAAGCCCTGGTGAATGTTCA  
GATCACGACGGAAACCGACCAAACGATACTGTTCTCGGTGCTGAGGTA AAAAGTCTTTCCGTGATAACTTTAGGATCGTTT

TTGCCATCTCAGCTGCATCCGCAACTTCATAGCCCAGTTCGTGCGAGGGTATCCATGATGACTTTAAAGGTTTTACCCTTGTCAT  
GGCTCTTCAGGTTTTTAACGTTTTCAAGAACAAGATGGCAGGTTTTTTGCGCGTATAATACGCGCCACATCGAAGAAAAGC  
GTTCCCTGAGCCTCACATTCGAAACCATGCGCGCGCCGAGCGAGTTTTTCTTGCTTACGCCCAGGCTGAACGGTTGAC  
AGGGGAAACCTGCTAGAAGTACATCATGATCCGGCACATGCTCATTAAATGTAAGCATAGGCATCGTTTTCAGGTACTTCAGGTT  
TATCACTGAGCGTGACTTCCCGAATATCGAGATTGAAAGTGTGTTCTGAGCATCGTTAAACCAGTTAGCTTTATATGTGCGCA  
CAGCCTCTTTATTCCATTCACTGGTAAAAACGCACTGGCCACCGATGGTTTTCGAAGCCCTTCCGTATACCTCCAATCCCAGCAA  
ACAGGTCAATAAACCGGAAGGCATAGTCAGGGTGATGTGCAGGCGCTTCCGGAAGCATTTCGTAGAAAGTTCCTCTTCGGC  
TAACGTCAGCGTCTTAGGTGAGCACTTACCATTAATCCAGCGATTAAGAGTCTCGCGACTCCACTCATTTTTACCAACTTTTCTA  
AGCAGTTCAGCCACGTA CTCTGGTCATAGATTTCCAGCACCTGCCCAGCAGCTTTTTATAATTTCTGTGCGCAGTTGTTCTT  
CCGCTTCTGCTTTCTCAAGCAGATCCTGCGCCAGTAATTCAAATTCAGACATATTGCCTCCATTGGGTCTTATGGGTGAAACTG  
TATCACTCATTGACCCAGATTGAATGTTTTATCTGGATATTTAAACAGGTTATTGTTAGGTAACGCACGTTGGCCACGCTGG  
AGCGTCTTCTGGGCCTGCTGTGCGCCTTTGAGGTGCTGGTATGGATGACGGATGGCTGGCCGCTGTATGAATCCCGCCTGAA  
GGGAAAGCTGCACGTTATCAGCAAGCGTTACTCAGCGCATTGAGCGACATAACCTGAATCTGAGACAACATCTGGCAAGG  
CTGGGACGGAAGTCACTGTGCTTCTCAAATCGGTGGAGCTGCATGACAAGGTCATCGGGCATTATCTGAACATAAAAACACTA  
TCAGTAAGTTGGAGTCATTACCGGTTCTCTTTGTCTTTTAGTGATTCTATAAACCTCATTACGTCTGAATATAAAAATCTATTATT  
GATTTATGTGGCTCATGAGTTGTGGGATGGTCTTGTTTTTGAATGTGCCAGTTTTCTTAATGGCAAAGATTAATTCACCTTCT  
GTTATTCCTAACATTTTCAGCAAATGTTTTGCTTCTATAGTTACTGACTTCATTTAATTAACCTCATGGTATCGATTTTCTTTACC  
GGCATCTTTAAACAATGGTGCTCGTTCTAGTGTGCTGCGGTACGCTTCATCATCGTCTGCGGGGCGGTTGCGATAGTGAAGG  
AGCTGCCGGGCGTGAGCAAATCTATCAGGCGCTGGCCGCTGATAATCTCCATCCGTTCACTGGCAATACTGACAGATTTTGAA  
CCTGCGCCGTTTTCCCGGTATGGCAAACAGACCGCGACAGTTATGACGTTTAAGCAACTTCTCGAACTCCTGTACGTGCTG  
TAAAGCAATATGGCCGCGATAGCGTTTAGCCTGAATAAGATAGCGATATTTTCTATTATTACCTGGCCGTCATGCCTCCATCG  
CCGGTATAGCGTTTTGTTCTGATGGTTCTGAAGCCATGCGCGGCTTTGTTGAATAAATCGAACTTTTGCTGAGTTGAAGGATC  
AGATCACGCATCTTCCCGACAACGCAGACCGTTCGGTGGCAAAGCAAAGTTCAAAATCACCAACTGGCCCACCTACAATAA  
AGCCCTCATCAACCGTGGCTCCATAACTTTCTGGCTGGATGATGAAGCTATTCAGGCCTGGTATGAGTCGGCAACGCCTTCATC  
ACGGGGAAGACCTCAGCGCTATTCTGATCTCGCCATCACCACCGTTCGGTCATTAACGCGTGTTTCAGGCTGACCCTGCGGG  
CTGCACAGGGTTTTATTGATTCCATTTTTACTGATGAATGTTCCGTTGCGCTGCCGGATTACACCAGTGTGAGCAAGCGCG  
CAAAGTCGGTTAATGTCAGTTTCAAACGTTACCCGGGGTGAAATCGCGCATCTGGTGATTGATTCCACCGGGCTGAAGGT  
CTTTGGTGAAGGCGAATGGAAAGTCAAAAAACACGGCAAAGAACGCCGTGATATGGCGAAAGTTGCATCTGGCCGTTGA  
CAGCAACACACATGAAATCATCTGTGCAGACCTGTGCTGAACAATGTGACGGACTCAGAAGCCTTCCCGGGTCTTATCCGGC  
AGACTCACAGAAAAATCAGGGCAGCATCGGCAGACGGCGCTTACGACACCCGGCTCTGTACGATGAACTGCGGCGTAAGA  
AAATCAGCGCGCTTATCCCGCCCCGAAAAGGCGCGGGTACTGGCCCGTGAATATGCAGACCGTAACCGTGCTGTTGCGAA  
TCAGCGGCTGACCGGGAGTAATGCGCGGTGGAAATGGACAACAGATTATAACCGTGCCTCGATAGCGGAAACGGCGATGTA  
CCGGGTAAAACAGCTGTTCCGGAGTTCACTGACACTGCGTGACTACGATGGTCAGGTTGCAGAGGCTATGGCCCTGGTACG  
AGCGCTGAACAAAATGACGAAAGCAGGTATGCCTGAAAGCGTGCGTATTGCCTGAAAACACAACCCGCTACGGGGGAGACT  
TACCCGAAATCTGATTTATTCAACAAAGCCGCCATGCGCTTCAAATCCTTCCAGCAACAGTTCTTCAAACACAAAAGGATCAAT  
TTTTCTCAGGTAGTTAATTTTTGTGGGAAGCCCGCAACGCTTTTATGCGCTCCAGCACCCGCGCGCACTTTGCTGCTTCT  
TTTGTGTCGTCGGTTGCGTACTGAACGCCGGAAGAATACAACGGCAAACAGTGCGATGGCGCTGCAAGCCCATAGAATAAGG  
TTTTCTGTAGTGGGGAAGGGGAACATGGTGATAGTGTGCTTTCTGTGGGTAAAGAAAAGGGCGGTTAAACCGCCCTGGTGT  
TTAGCGACGGCTGTAACCTGCCACGAAGCGCTGCCTGACTGATTTTGGCAAATCCGCCCCTAAAGTACGGTGCCGGTTCGAG  
TAGCGGGCGCCATTAGATAGCAATAGCCGCTGGATTGCAGCAGTTCGTTGCGCAGCTTTTCTTCTGCTTTGATAGCCGGGA  
CTCCGCAGACTGCAAACGAACGGATAATTCGTTAATCTGGCGTTGCTGGTTATTCATCTGGCTCTGCATCGCATTACCTTTATCT  
TGGCTGACGCAACCAGTTAAGAGAGCTGTACAGGCTAATGCACTTAATATAATTTTTTACGTTGGCTCCTTAAATTGAGATT  
ATTCCTAGCCCGCTATAAGCGAACTTTCCCGTATTTACTTATGATCTGGCTTATCATCGACTGGTACTTCCACCTTCGCCATTAT  
CCGGGCATTCATTAAGAAAAGCCTTCTGGCATCCCTCGTGTGGTTGGGTAAAAGCCGTGCTTGTCTTTTTAACGATATTGA  
AGAAAGCAGCTTACACTCGCTTCCGCGCTATCGCCGGTGAGCTTGGCCGCTGCACATAATAACTTTGCAG  
GGATCTTACGATGGCTGGCAGGAAGATAAAGCAGACTACCAGCTGCTATCAGAGGGATTAAGAGTTTCTTCAATTGTTTTGTC

CTAACAGTTTGTTCAGATATACACCCGCCAGAATGTTGATAACGGTAAGTAATATTAATAATAACGCAGAGTTATAAATAGATTT  
GTAACCTATATCGCCTGCGATATATTCGACAATAAAAACGAAAATCGTTAACATTGCGAACAACTTAATTAACCTTTCCTGTAATTT  
TCTTAACGATATAAGCAACTGAATAAGAGCCGGATTTGATGATGCTGGCGAGTAACCTGATAGCATGGACTCGGAATTTTCTTA  
AAATGGGCGGAATGGAAAATGCCTTTTTCTTCTTCTGCCTTTTTGCTTTTCCGCAAAATCAATAACATCGCCATTTTTATACT  
CTCCGGTTATATCTTTAGATCATCAAGTGATAAACCACTATCAAGCAGCTCTTTGAGCCATGTTGGTCGGCGGCCAGTCCCGGA  
CCAGGTATTTTCTGCGTTCCTGGGGTCGCGGTATTTACTTGTCTATGTTCTCTGGGGTTGGCAACGCCCTGCATTTTCATGGC  
TTCCAGGCTAATGCCAGCGTCCAATTTTGCAGTTAGCCAGGCCGGGCGCTTCCCTATACCAGTCCACGTATTAAGGGTTATC  
CGGGTCACGATACATGGGTTACCTTTGGGGCGTTTTTCTGATTTACAGGGGAACCAGCATTACCTTCTTCTTTCAGAGGTTT  
TCTTTTCGTTTCTTCTTGACACGATCTCATTAGCCCTTATCATAAACATAAGTCGTCGAAATTACAATTACGCGGTGAAACGTAA  
ATGAGTAAACATCCAAAACCTTCTGGTTCTCGCTCTGGCCTGCCTTGCTTGTGCTGGCCGTGCCAGTGCTGCGCCTGCCTCAGA  
TGAAGTTGCCAGGCTTGCGCAGAGATGTGCGCCTGATGTTTACCCTTAACAATGGCGTACATCGTCGGCCATGAGTCCCTCAA  
ATGGGCCGTACAGGATCAATATTAACGGTGGTAGTACCCAGTTAAAACAGCAACCACGTACTGAAGCTGAGGCCGTACAGCGT  
TTCGAAAGTTCTGCTGAAGGATAATAAAAGTTTTGATATGGGCCTTGACAAAATTAACCTCAATAATTTAGTGGGCCTGGGTCT  
TTCGTTGACGATATTTTCAAGCCCTGCATCAACCTGCGGGCGAGCCAGACCATCCTTAAAGCCTGTTATGATAGCGCCCTGA  
AATCCTATCCAGCCGGGCAGGTTGCGCTGAGACACGCGCTTTCCTGCTACAACACCGGCTCACTCATAAACGGGATTTCTAAC  
GGGTATGTCACGAAAGTTATCAACGTGGCGCGTCAATCAACTGATTTGAAAATCCCTACGCTGCTACCTGATGGCCAGACCAG  
TGAGGACAGCACCGCGACTGAGCCTCAGCAGGCCAAAAGTACGGCCACGCAGTATGACGGTGAACAAGATGTTTTTGGTTC  
GGGTGATGGCGATGCCTTCAGCCGAAATAACGGATGCCTTTTTAACCAAACAGGAAACAGCGAAGGGGGAGTGAGGTTA  
TGGATGGAACGTTTGTACCTTGTATTGCAATCACAGATCCTGGAGCTATTTGAAACAGGAAAAGTGAAGGAGGTAACGATAA  
AACGGGTTTCATTAAGACGTGGTATCCCGTTTTTTCAGATAGACGATGAACAGTTGGGCCAGATCGCATGTTCCATTCCGGTT  
AACAAAGAGCATGAACTACGAACCTGGGCTGATTTAAGGCTACTGGCAGAGTTTTTGAAGATAAGTGTGGCGTTGAAGAAT  
GCCGGTTAAATCTGCAATCAACAGAAGATAGTGAGTAAGGAGAAAGTATGACCACGTTGTTTAAAGAAGTATGGCCCTGCGGT  
AGTTATGGGCGTTTTGTCCATTGCCCTGCCGCAAATTGCGCTGGCCGCTGGCACCGATACTGGTGAATCAACCGCTACATCAA  
TCCAGACGTGGTTGAGCACATGGATTCCAATTGGTTGTGCTATTGCGATCATGGTTAGTTGCTTTATGTGGATGCTTACGTA  
TCCAGCCAGCTTTATCCTCGTATCGTAATCTCGCTGATTGGTATTGGTTCTGCATCATTCTGGTTTTCCCTGACGGGCGTAGG  
AAGCTGAACAACCGGAAAAGGGGGGACTTTTTGTCCCCAAAGTGAGGACTACAAAGATGTTTCGTTGACGGGAAAAGACC  
GCTTTTCAAAGGTGCGACTCGCTTACCTCGCGCGCTGGGTGTACCACGTAATGTAGCTATGATGATATTTCATGATTTCTGCCTC  
GCTTTTTATGATTATTCATATGTGGGCGATCCTGGTGTTCTGTTTTTGTGGATTCCCTTCAGCTGCATTAACAAAATATGACGACC  
GCATGTTTTCGAATTATGGGCCTGTGGTTGAAAACCAAATTCAGTAATTGGTTTGATTCTCCGTTTAAAGCAGTGGGGAGGATCG  
TCTTATCCTCTGTTGACTACAAACGTAAGGGTTTTAAATAATGAGAGCTGCCACCGCTACGAAGCCAAAAAATTTGATGCCT  
ACCGTAAGGAGCCATCAGTAAATAAAAAGTATTTGCCCTATTCTTATCACCTCAATGATTACGTGATTTTCGATGGAAAACGGCG  
ATCTGATGGCTTTTTTCAAGCTGGATGGCCGCACACATGACTGCGCATCAGATCGGGAACCTGGTCACTGGCATAAAGACCTT  
AATACGCTGGTCAAGAGCTTCGGAACAGACCATGTAGAGCTGTGGACGCATGAATATCACCATGAGGCTAAAGAGTACCCGG  
ATGGTGAGTATGACCATTTTTTCCCTGCTTATGTTGATCAATATAACCGTAAGCTGCACGGTGATTCCAAGCAGCTGATTAATGA  
CCTTTATCTGACCGTTATTTACAAACAGGTAGGGGATAAAACACAGAAGTTTTCTGGCGAAAATTTGAAAAGCCGACTCGTGACG  
AAATTCAGCGAATGCAGAATGAGGCGCTTGAAGGTCTGGAAGATATTTCTGAACAAATCCTGGAAGCAATGAAGCCGTATGG  
CATTACAGCAGTTGGGTATCTATTATCGTGACAAACGCGGTGTTGAAATTCCTGCGCCTGATAAAAAAGAACGTGAAGAACTTG  
CTGAAGTCGATGAATCAGACATTTTTGACGAAGCCATTGTTATCGAACGCAACGAGCCTGAACCTTCGCAGGCTCACGCTTAT  
TCAAAGCGCTGGAGTTCCTTTATTTCTCGCAAATATGGAATGGGCCATCGTGCTGTTTGGCGTGATCGTATCCGTGAGTAC  
ATCATGGACAACCGCCCTGTTAGCTCACTGTGGGGGGATGTTGTCCAGATCAGAACGGTAGATCACAACCTTCTATACCACCGG  
CATTGAATTTTCGTAATACGAAGAAGATACAGAGCCAGGCCAGCTTAACATGCTTAAAGAAGCCGATTTTGAATACCTTCTGA  
CGCAGAGTTTTTCTTGCCTCTCTGAATCTTCAGCTAAAACGTTTCTGACGCATCAGGAAAATCTTTGCAGGAAACGCGCGAC  
CGTGCGCAAAGCCAGCTGGCACAGCTTGGTACCGCGCTCGATATGCTGACGTCCAGAGAGTTCGTGATGGGCTACCATCATG  
GAACCGTGCATGTCTGGGATAATGACCAAACGCGGTACAGCGCAAAGCGCGTCTGTGTAAGGTTATGCTAACCGGCTGTG  
GCGTGGTTGGCGGGACTCTCAGCCTGGCCTCTGAGGCTGCATATTATGCGAGACTGCCTGGCAACCAGAAATGGGCGCCGC  
GCCCGTTCCGATAAACTCATGGAACCTCCTGCACTTCAGCCCGTCCACAATTTTATGCGTGGCAAGCCTGACAATAACCCGT

GGGGGCCAGCGCTGACCATGTTCCGCACGATCAGCGGTACGCCACTCTATTTTAATTTCCATGTGACCCCGCTTGAAGAACTT  
TCCTACGGTAAACGCCCGCTGGGCCATGCGTTAATAACGGGTATGTCGGGGGAAGGTAAAACCACGCTGCTTAACTTCCTGCT  
GGCGCAGTCAATGAAGTACAACCCGCGGCTTTTTGTTTTATGACCGTGACCGCGGTATGGAGCCGTTTCATTGAAGCGTTGGT  
GGCTACTATAAAGTTCTGCAACAGGGTATGCCGTCCGGGTTTGCCCCGCTTCAGATTGAACCGACCAAACGCAATATTGCCCT  
CATTAAAAACCTGTTCCGCATTTGTGTGAAACCACCAATAACGGGCCTATCAGCGCAACGATGGCTACCGAACTGGCTGAAG  
GCGTTGATGCGTTATGGGGGAAGGCTCACTTATTCCACGCGAGGCGCGCACCGTTACTATCCTGGACGGGTACGTGAATGA  
AGTTGTGGAAAATGGCGTATCACTGAAAGGGCTGCTGCGCGAATGGACGCGCGAAGGCCAGTATGGCTGGCTGTTTGACAA  
TGATAAAGACAGCCTGGATCTCAGCGCAATGATATTTTTGGCTTCGATTTATCCGAGTTTATCGCAGCCAAAGAGGAAGTATC  
CAGCCCCGCCGCTACTCCGCTCATGATGTACCTTCTGTACCGGGTACGTGACTCCATCGACGGCAAACGCCGCGTCATTCAGT  
GCTTTGACGAGTTCCACGCCTACCTTGACGATCCGGTTATCGAGCGTGAAGTTAAGCGTGGTATCAAACTGACCGTAAGAA  
AGACGCTATCTATGTGTTTGCCACGCAGGAGCCGAACGATGCGCTGTCCAGCCGATTGGCCGCACGATCATGTGCGACACCG  
TCACAAAAATCTGCCTGCGCGATCCGGAAGCTATCCGAGAGGATTATGCCTTCCTTACTGATGCTGAATACGACGCGCTGATGT  
CGATTACCGAACACTCCAGACAGTTCCTGGTTAAACAAGGGCAACAGTCTGCGATTGCTTCTTTCAATCTCTACCCCTCGCAAC  
AGCGACGATATTGATGCAGATATTAAGACAATGGACAACGTTCTTAGCGTGTTGTCCGGTGAACCACAAAACGCCGAAATTGC  
GCATGAGCTGGTTGAACGGCTCGGTAATGACCCTGAAGTATGGCTCAAAGAATACTGGCGCCTGACGGCTTAACAACGAGGC  
AAAACACCATGAAAAAAACACTGACGGCAGTATTGCTGACCACCGCCTGATACTGGGAGGCGCGCAAAGCGCTTCCGCAG  
GCATCATCGTGACCAACCCTACTGAGCTGGCTAAACAGGTCGAGCAGCTTCAGCAAATGGCGCAGCAGCTGGAGCAGCTTA  
AAAGCCAGCTGCAAACGCAGAAAAATATGTATGAGTCGATGGCAAAGACAACCAACCTGGGCGATCTGCTGGGGACGTCTA  
CCAGCAGCTGGCAAATAATTTGCCGGACAACCTGGAAGGAGATCTACAGCGACGCCATGAACTCCAGTTCTTCCGTCACGCC  
TTCAGTTAACAGCATGATGGGCCAGTTTAAATGCGGAAGTTGACGACATGACGCCCAGCGAAGCAATTACCTACATGAACAAA  
AAGCTGGCTGAAAAAGGCGCTTATGACCGTGTTATGGCAGAAAAAGCCTACAACAACCAGATGCAGGAACTAACCGATATGC  
AGGAGCTGACGGAGCAGATTAACGACTCCAGACCTGAAATCGATTGCTGACTTACAGGCCCCGATCCAGACGTCACAGG  
GTGCTATTCAAGGTGAGCAGGCGAAGCTGAATCTGATGAACATGTTGCAGCAGTCACAGGACAAGCTATTACGTGCGCAGAA  
AGAACGTGCCACCCACAATTTTGTTTTTGGAACCGGCGGGGACGTTACCGCGTCACCTTCAATTAAGTGAAGTAATTATGAAA  
AACTACTGCTTGTATCCCTTTCCTCCTAGTGGCCTGCGATGCCTCGCATGACGTGGAGTGGTACAAAAACATGAGAAAGA  
GCGCAAGGCAACAATTCAGGAATGCAAGAAAGACGCGGATGAACTTCAGAAACCTGATTGCAAAAACGCGCGCGAAGCCG  
ATCGTCAGCTGTTTGTGTTCCGGCAAAAAGACGGCGAAATCAATTCACCGAAAATTTAGGAGTAAGGAGGCAATATGGCATT  
CACCTAGTCGCAGACATTTTCGCAAAAGTAGACGGGGCGATTACGTCAATGGTGAGCGCCAATGTTGCCACCATTATCTCTG  
ATGTAACGCCTCTGATTGCCACCTGTCTGACAATCAAGCTGATGGTTCAGGGGATGTAICTCAGCGTTTAAATCCGGGGGGCGGGC  
GACAGCCTGAGTTCGCTGATTAAGAGTATCTTTCCATAGCCCTTATCCTGAGCTTTGCAACGGCGGGCGGCTGGTATCAACA  
GGAAGTGGTCAACGTGGCGCTTCACCTGCCGGATGATTTTCCGGGATACTGTCTGCCCTAATAAAGTCGGTGAAGTGGC  
GTACCGGCGATTATTGATAGCGGTATTGAAAAAGGTATCAAGATCGTCAACACCGCATGGGAAGCCGAGACGTGTTTTTCATC  
GAGCGGCCTGGCCGCGTATGCCATTGGCGGCATTATGATGATTGCTACCGTTGTGCTGGGCGGCCTCGGTGCGGGCTTTGTG  
ATCATGGCTAAGATCCTTCTGGCCGTTACGCTTTGTTTTGGCCCCGATTGCAATCTTCTGCCTGCTGTGGGGAGCGACAAAAA  
CATCTTTGCTCGCTGGCTGGCGTCGGTCATTAACCTATGGCCTTGTGTCGTCATTCTTGCCTCGTGTGTTGGTTTTCATCATGCAG  
ATGTTGACAACCTCCTGTCTCGATGAACTCTGATGCCGCTTACTCATCAATCACTGGTTCTATCTCCGCTTATTACTGACGGT  
CATTTCCGTTTTCTGTTCTGTTCCAGATTCCGCAAATTGCCGCCAGCTGGGGTAGCGGTATCAGCGCCGGAGTTGCTGACGCCG  
CACGCTCTACGGGTTCTTCATGCAGGCGCTTGGCAATATGGGCAGCCACGGCATGTTTGGCGGTAATGCGTTCAGAGGCGG  
TAACAGTGGCGGCGGCCAGCAATCGGCAGGTGGAGGAAGTGGCAGCAACAGCGGAGGAAGCAGTGGTTCTAATTTAAGTG  
GTAAGGCAAGGGGCGAGTCGCGGGAAGAAGGCTGCATAAAATTAACAAAAGTTCGTTGAAATTGCAATTTGACGACTTAT  
TATAATTAGTACGTTCAACAACCGATAATGGATGCCGTAATGCGCAGCTTATTGCTTATGGGAGTTCTTCTGATTAGCGCCTGTT  
CCAGCGGGCATAAACCGCCACCGGAGCCGGACTGGAGCAACACCGTTCCAGTAAACAAAACAATCCCGGTTGATACGCAAG  
GTGGTGCAAATGAAAGCTAATAAAAAACAGGGCTTACACGTGAAGCCATTAAAGAGTTCAACGAAAGCCGTAAAGGGCTT  
GAAGTTGATCTGATGGATGAAGTGTGAAAGTCCCGGCGTACCGCCTGGATGGTTGCCACCGGTTACGCGGTGGTAACTGTTT  
TTGCACTCTCTTAGTTGGTTACGTGGTGCATAAGTACAGCCAGCCAATCCCCGCACATCTGCTAACGCTCAACGAGGCCACTC  
ACGAAGTACAGCAGGTCAAGCTGACCCGCGACCAGACCTTATGGTGACGAAATTGATAAGTTCTGGCTGACACAATATGTC



ATTCACCGTGAGAGCTATGACTTCTATTTCAGTTCAGGTCGACTATACGGCCGTTGGCTTAATGTCCACGCCGAACGTGGCAGA  
GTCTTACCAGAGCAAGTTCAAGGGCCGCAACGGTCTTGATAAGGTTCTGGGCGACAGTGAAACGACCCGCGTGAAGATTAA  
CTCTGTGATCCTCGATAAACCGCACGGCGTAGCAACGATACGTTTACTACGGTTCGCCGCGTGCGCAGCAATCCCGTTGATG  
ATCAGCCGCAGCGCTGGATTGCCATTATGGGGTATGAATATAAATCGCTGGCGATGAATGCTGAGCAGCGTTATGTCAACCCG  
CTGGGTTTCCGCGTGACGAGTTATCGCGTCAACCCTGAAGTAACTGAGGGCTGCCCATGAAAAAACTACTTCTTTTCAGCAG  
TCGTTTTGTGAGTCTGGGAGGCGCGGCCACTAACGTTATGGCGCTTGAGGTTGGCCGCAATTCTCCTTATGACTATCGCATT  
AAAGCGTTGTTTATAACCCTGTTAATGTGGTCAAATTGACGCTATCGCCGGTGTGGCTACCCACATTGTTGTGCGCCTGACG  
AAACCTATATCACTCATGCTTTTGGCGATTCTGAAAGCTGGACGTTTTCGCGACAAAATGAACCATTTTTTTGTGAAGCCGAAA  
CAGGCCATGAGTGATACCAACCTGGTGATCGTCACCGATAAGCGCACCTATAACATCGTCTCCATTTTCATCGGTGAAGAAACG  
AAGAAAAATGCAGACGGTACGGTATCAAATCCTTTATTGAAACGCCGTGGGCTGTGCGCCAGGCCGTTCTTCAGCTGACCT  
ATGAATATCCGTTTGGAGCAGCAGGAAAAAGCCAAAAGCGCGGCTGATAAAAAACGCATTACGCAGAAGCTGAAGCAGACGG  
CTTTTTCGCGGGGGCGAAGAATATCAGTACGTAATGAGCGAACAGCCTGAAATGCGCAGCATCCAGCCGTTTACGTCTGGG  
ATAACTACCGCTTTACCCGTTTTGAGTTTCCGGCCAATGCGGAGTTACCGCAGGTCTACATGATTTTCGGCCAGTGGCCAAAGAA  
ACGCTGCCTAACTCTCATGTTGTGGGTGAGAACCGCAACATCATCGAGGTGAAACCGTCGCTAAAGAGTGGCGTATTCGCT  
GGGCGATAAAGTCGTTGGCGTTCGTAATAATAATTTTCGCGCCGGGGCGCCGGTGCGGTAGCAACCGGTACGGCTTCCCCGGAT  
GTGCGCAGGGTTCAAATTGGGGAGGATAACTGATGGCCGTAAGAGTGTGCATGTAGATCAGGAACTCGATGAAAACACCG  
GAGACGGTGAATTCGAAAGCGAGCGTGCCGGATTTAAAGGCAGTAACCGCCGTTTCGGCTCCTGGTATGAAAGCCTTTGTCAT  
ACTGATGGCGCTGCTTGGTATTTCATCGGGATTACGGTTCATGGTAAAATTCGCACCCCGGCTAAAGCTGAAGCTGATA  
AAGACGGTGGTAAAGCGCAACAGGCCAATACTGCCAAACTACAGCTTTAACAGCGATCCTGATGTTAATAAACCTGCAACT  
GCGCAGAATAGCGCCACTGATGCCCGTGTGTGCAGGCTGCCGCACAGGCAGATGCAGATGCGGGCAGCAGCAATACCGCC  
GCGCGTACCTCTAATAAGCGTAAAGAACCTTCGCCTGAAGAACTGGCTATGCAGCGTCGTCTGGGCGGCGAGCTGGCCCAGA  
CTAATCAGGCGGCTACAAGCAATAGTCCCGGAGTGCAGCCCCAGGACAACGAAACAAGCGAAGGTAGTTCAGCACTCGCTA  
AAAACCTGACTCCTGCAAGGCTGAAGGCTAGCCGCGCTGGAGTCATGGCTAATCCCAGCCTGACTGTTCCGAAAGGCAAAT  
GATCCCCTGTGGTACCGGCACCGAGCTGGATAACCTGTTCCGGGTGAGTTTTCTGCCGGGTTTCACAGGACGTTTACTCA  
GCTGATGGACTCGTTAGGCTGATTGATAAAGGCTCATGGGTTGACGGGCAGATTACCGGTGGTATCAAAGACGGCCAGGCG  
CGCGTGTGTTTCTCTGGGAGCGTATCCGCAATGACCAGGACGGGACAATCGTTAATATTGACAGTGCCGGAACGAACTCAC  
TCGGCAGCGCGGGGATTCCGGGCCAGGTGGATAACCCATATGTGGGAGCGTCTGCGTGGTGCATCATGATTTCTGTTGTTCTC  
TGACACCTTAACGGCGCTGGTTAACAGACGCAGAGTAATAACATTCAGTACAACAGCACAGAAAACAGCGGTGAGCAGCT  
GGCGTCTGAAGCACTCCGCTTTACATGTCTATCCCCCTACCCTCTACGATCAGCAGGGTATGCGGTGAGCATTGTTTGTG  
CCGCGACCTCGATTTTCAGCGGCGTTTATACGCTCGCAGACAATAAAAAAGTGGGCGCTTAGCGCCCGCTTTTCTTCAGGAG  
TAATCATGACTGATGCAGCTTTCTATCAACTTGGCCACTGCGCGAGTATTTAGAAGATCCTACTGTTTTTGAATTCGCATTAA  
CTGCTTTTCAGGAAGTTATCTGTGATACGTTTCAGCGGCCGAGGGTGTGCAGAACGCGGCAATTACGGCAGATTTTATTAGG  
AACCTTGCTAAATCGTTGGTGAGCAGCAACAAGCTGACCATGCAGGCCATTAATGACGTGATCCTGCCTGGCGGGATCAGGG  
GCGTTATCTGTCTGCCCCCTGCGGTGATTGACGGTACAACGGCCGTAGCGTTTCGTAAGGATTTGGCGGCCGATAAAAACTG  
GAGCAGCTGACCCGCGAGGGGATTTTCAGTACTGCCGGAAGATTACCGGCAGCAAGCAAAGCCTAACGGATGATGATTTT  
TTCCTTAAAGAGCTGCACAGCAGCGAAAAATGGCCCGCATTCTGCAAACCGCCGTTGAGAAGAAACGCACTATCGTGATCT  
GCGGTGAAACCGGGTCCGGGAAAACGGTACTCACGCGCGCGCTGTTAAAATCGCTACATAAAGACGAGCGTGAATTATTTT  
AGAGGACGTTACGAAGTCACGGTGCATCACGTTGTAGAAGCCGTTTATATGATGTACGGCGATGCAGGAAAGATCGGCCG  
GTCAGCGCCACTGATGCCCTGCGAGCCTGTATGCGTCTGACACCGGGCCGATCATCATGACTGAGCTTAGGGATGATGCTGC  
GTGGGATTATCTTAAAGCACTTAATACCGGCCATCCAGGCGGTGTTATGTCAACGCACGCTAACTCTGCGCGGATGCCTTAA  
CCGTATTGGGCTGCTTATCAAGGCGACCCCTATCGGCCGTATGCTCGATATGAGCGATATTATGCGAATGCTCTACTCCACCATT  
GACGTTGTGGTGCATATGGAAAAGCGGAAAATCAAAGAAATTTATTTGACCCTGAATATAAAATGCAGTGTGTGAACGGGA  
GCCTGTAATGAAAACTTAGCAACCTGGCTTCTGGCCGAGCATTACGACAGCCGCCCTGCCGCTTTGCGGTGGAACCA  
TCCGTTCAGGTTGGCTACTCGCCTGAAGGGGGGGTAAGCGGGAACCCAGAAAATTCGCCATTCCGCATTGTGGAATTTTT  
TGGGGGGGTGGTCCGCGCATGACGACCCGCCAAAGGCTACCGCATCTATCTGAGGCGCTGTGGCGCGACGCTGAAACCC  
GGGAATTCCGCTACTCCAGTTCAGGTCGCAATAGTTCGTCCAGGTCGGGTGGCGTACGCCGGAACGCCGATTTTTCCG

CAACCGTTTCTGCGTTGTCGGCAAGGTGGTCTCAGAGAGCGCTCAAGAAGCGGTTTTTCTCGTATGTTTAGCTACGGTGGCC  
TAGGAGCCTGCGCGCAGAAGCCAAATCGGCGGAAGATCGAGGACGATACGGGGATGGCTGCCAGTTACCTTCCTTACCGA  
CCCGACCAATCCTATCTGCTGCCCTTCTCTGGGAGAGTGGCTACCTGAAGGGCATCTTGCTACTTCATCAGCGAGACTGTC  
GATACGCTGGACTTGAGCGCATTCCACGCCGGTATGCCGGCGGTGGTCCGGGCAATCAGCCGTTTCATCCGGCGATGATGG  
TCAAAGTGCTGATCTATGGTTACGCGAGCGGCGTCTTCTCTTCGCGCAAAGTACCCAGGAAGCTGTACGAGGATGTCGCGTT  
GCGTGTGCTGGCCGCTGGAAACTTCCCGGCCACCGCACGCTGAGTGACTTCCGTGCCCTACACCTGACCGAGCTTGAGAAT  
TTGTTTCAGGTGGTGAAGTGGCGCGCAATGTGGGCTGGTGAAGCTTGGCACGATCGCGGTGACGGCACCAGGTA  
AAAGCCAACGCCAGCCGCCACAAGGCGATGAGCTATAAGCGCATGAAGCCGGCCGAGGACGAATTGCATTGCGAGATCAAG  
GCGCTGCTTGATCGCGCAAGGCTACCGACGACCAGGAGCGTAACGAGCCGGAGCTGGACATTCCTGCCGAGATTTCTCGC  
CGCGAGAAGCGCCTGGAGGCGATCCAGGCGGCAAAGGCGCGCCTGGAAGGGGTCGTTCCGGCTGAGGGCGAAATGACA  
CCCTAAGCTTTCGTTTCCTGGGCCAAAGATATTCGCCAGTCAGTAGAATGTGCGCCAGCCCAATGGGGATATGTGGGGAA  
GAAATTCAGGGGGAACATCCAACCCTTCGTTCCGCCGCTCCGTGACGGCATGACCAAGATGGACGGTATTCCAGTAAATGAT  
CACCGCAGTCAATAAATTGAGCCCAGCGATTCCGGTAGTGCTGCCCTCTGTCGTGCGATCGCGAATTTCCCCCTGCCTCCCGAT  
ACGGAGCGCATTTTTGAGCGCATGGTGGGCCTCTCCCTTGTTAAGACCGATCTGAGCACGCCGCTGCATGTCCGTATCCAGGA  
TCCACTCAATAATGAAAAGGTCCGTTCAATACGACCAACTTCACGAAGCGCAACTGCAAGGTTGTTTTGTCGTGGGTAAGA  
AGCGAGCTTGCGCAGGAGTTGGCTGGGCCTGATTTTGCCAGCGGTCATGTCGCGGCACAACGGAAAATATCAGGCCAGTT  
CGCAACGATAAGATCCTCCCGGGCTTTTCCACCTACCAACTTCGTAAGTCCCTGGGGGTCGTATCGGGATTAATAACGTACAA  
CCGCTTCGATGGCAGATCCCTGATTCGCGAAGCAGATTGTAGCCGAGCAGGCTACTGGCTCCGAACAAATGGTCGGTGAAT  
CCTGCTGTATCGGCATACTGTTTCGCGAACATGGCGACCGACCTCGTTCATCAGTAGTCCATCGAGAATATACGGTGCCTCGTC  
ACGGTCCCGGGATCGACTGACAAGCGAATGGCGGCAACTGGTCGCTTACGTGAGTATACGCTTTGAGGCCGGGAACAGAA  
CCATATTTGGCATTGACCATGTTTCATGGCTTCGCCATGCCGCGCTGTGCGGAAAAACTGACCATCGCTCGATGCTGACGTGCC  
CATCCCCAGACGCGTGACATCGGCAGTTTACCCTGCGCGGCCACCACAATTGCCAATGCCTGGTTCATGGCTTCGCTTTCAA  
CATGCCAGCGGGCAAGGCGTGAGAGCTGCCAGTAATCATGCGTGTGTTGAGCTTCCGCCATCTTACGCAGGCCAGATTGAG  
CCCTCAGCGAGCAGGACGTTGAGCAGACCGATCCGGTCGCGACATGGAGCCCCGTTTCTCAGATGGGTAAACGCATCTGT  
GAAACCAAGGGCTGCATCAACTTCAAGCAGCATGTGCGTAATCCGAACGGACGGCATTCCGGCGATACAGATCCAGTATGAGT  
GCCTCGGCACCATCCGGCACGTCTGCTGTCAACCTGTGATCCGCAACGTTCCATCTTCTATGCTACCGTGCGGAATAGTGCCG  
TTACGGGCAGCCCGGGCCAGCCGCTTAAGAGCGATCGTGAGTCCGCGCTTTCTGTCTGCCAGCCAATCCTGTGGGTTGGAAG  
GCACGGCCAGTTTTGCATTTTCTGCGCCGCGATCATCGGCACCAAGTACCTGCTTGAAGTACCATAGCGGCGCGAATGAGC  
GAGCCAGACATCTCCGGAACGAAAAGCATCCCGGAGGTGAAAGAGTACCGCCACTTCCCAAAGACGGGTATCTCCTTTTTCC  
TGAGCTCGTAAATGACGGTTCATTTGGAGCTGGGCCGAGGAAACGCCTTTCTGGCGATGCAACACCTTTTCATCTCTCCGAT  
CGACAAAGCTGCTGCTACCAATGGTCCGGCGACCGGCGCGGCTTCGAGCTTACGACAGCGCAACATGCGGGGGCGCATAACG  
ACGAAAGCGATGGTATCCCTGCCGACATATGCAAGAGGCTCATCGGCTAGCGTGTGCTGAGTTGAGTCCCTGTGCTACCA  
GTTGAGCGAGCCGGTCCCATGCAACCGAACTGGCGACAGCCATCTCCAGCGGGGTTCCGTACTGCGGGCCTCAAGCAACG  
AAGCTCCCAGCGCGGTGAAGGTACGGATCGTATCCGTGAGTGTGGCTTTAGAGCCGGAAATTGTTTCGTCATGCTGGCGCTT  
CGCTTCCCGCCAGTTTTTCTACGATCCTGTGATGGGTTTTGACTATGGCATCAGCAATCGCCGCTTCCCACTCCACAACACA  
GACGGCAAGGATCGCCAGCGGCGGTCCGAAGTGATGTCACGCAAACCGTCGGTGAAGTAGCGTTACCCTGCCGACGCA  
GCCGGGCAATGCGATGGGCAGGTATGCTGGCCAAAGCACTATGATTGATATTCAGGGTACGCAGAAATTCGAGCCTGTGAG  
CAAACGGTTAGCAGCAGCCGAGTTGTTACCAACCTCGAAGTTGCGAAGCCAGATGAAACGACTGATATTGCCGGCGAGCATT  
TCACTCAGAAGTTTGTCCAGGTGATCGCGAACATCCGCTGTAAATTTCCACAATCCGCGTTTTCAATCCGCCGCTCAGCGGC  
GACCAGAGCATCCGCGCACAAGCGCTCGATTGTCGATACTGCGGGCAGAATGGTGGAAAGTTCCCGACACCGCACATAAAA  
ACGATGAGCAAGATCCTCGTTTGTCTGGCATCTTCGGCCTGGCCGAAAGTCCACTCCCGCAGATCACGGGCACCACGGCCC  
GTGAAGGTCTGTAGCCGTAAATTTGCGCGAGCGTGTCCATGTGCTGCTGACGGGTTTGGCGCCGTGTGGCATAAGTGAGAA  
GCGCATCAGCCGAACTCCAAGCTGAGCACCGACGAAGGAAAGGACTTCACGCGGGATCATCTACCAGGAGCCAGTGCA  
CGGCCCGGATATCGTAAGGCACAAAGTTGCAGGGCAAAGCCAATCCTGTTTTCCGGTCTGCGGCGCTGCCTAATGTTTTCCA  
GGTCATCATCGCCAGCGTGTAGAACTTCAGTAGCGACAGTTCGTCCGTGGGCAGATCGAACAGCGCTGCTCGCTGCCGTTT  
GGTGAAAATATGGCGTCGTGACATACAAATTCGTCCCTTTTGAAGTATAGTCTGTTTTGGACAACAGCCAGCCCATATAAATCA

GGGCGTCCGATACAAAAATCCAGGAGGGTTCAATTGGGACATCGTGCCGCCATTTACTGCCGGTTC AACAGCGGATCAG  
TCTTGTGAACGCCAGGAATTTGATCTGCGAGCCTTCGCCGGCCGTGCCGGCTACGACGTGGTGGGAATATTTAAGGAAACAG  
GTTACAGGAACTAACTCGACCGGGCCGAGCGAAAGAAAGTCTTGCGCTTGCCCAGTCCAGACAAATTTGATGCAATCCTGG  
TCACTGAGCTTTCCCGGTGGGGGCGCTCGACGCTCGATCTGCTCAATACGCTACGTGAACTGGAGA ACTGGAAGTTTTCCGT  
GATAGCCATGAATGGAATGGCGTTTCGATCTTTTCGTCGCCGTATGGACGAATGCTGGCGACGTTTTCTTTCCGGCATTGCGGAGT  
TTGAGCGGGATCTCATCAGCGAGCGGGTCAAGTCAGGCCTTGCTGTTGCGAAGGCACGTGGTAAGAGGCTTGGTCGTCAGG  
CCGGAGTGCACCAAATCAGACCGACTTTTGCCTAAGGTGGTTGCGATGAGGGCCGAGGGACGCAGCTATCGCTGGATCG  
CACGCGAGCTCGGTATCAGCAAGAATACCGTCGCTGACATCGTGCAACGACACAGAGCTAACGCTTAGGGTGTCAATTCGCC  
CTCAGCCGGAACCGACCCCTGGAAGCGCGCCAGCGTGAAGCGGACCAGGCCGGGGGCGCAGCGAAGACGATGGCCGCC  
GGCCTCGCCATCCGGATGGCTCGGACAAGGGCGGTGGCTCGTACAAACGCGAGTTTGGTGTGCCGGATGACCGTGATCAGG  
AAAGCTTACCGATCCGGACAGCCGGATCATGAAACACGCCGGTGGTGGCTCCGAGCAGAGCTACAACGGGTACACAGCGG  
TCGATGCCGAGCACCAGATCATCTGGCGGCGGAGTTGACCAACTGCGCCGCGGACAGTCAGGCGCTGCTGGGCATGCTGG  
CAGCAGTTCAGGCCAACACCGGAGAAATGCCGGCCAGACGCTGGCGGATGCGGGATTCCGTAGTGAGGCTGTTCTGGCA  
AAGGTCGCCGATCACCACGGCGATGTCATCGTTGCCCTCGGCCGCGAGGGACGTGAAGATGCCAAGGTCAATGCCAAGACC  
CATCCGCATACGGCGGGCATTGCGGCGAAATTGAAAACGGAGCAAGGCGATGCAGCTTACCGCCGGCGCAAGTCGATCGTG  
GAGGCTCCGAATGGTTGGATCAAGGCGGTGATGGGATTGCGTCAGTTCAGCATGAGGGGCTGGACAAGGTGCAAGCCGA  
GTGGAAGCTCGTCTGCATGGCGCTAAATCTGAGGCGAATGGCGTATCTGTGAGGGCGAAGGTTAAATGGGGCGGCTCAAAT  
GCACCCAGTCGTATAACACGCCGCGCGCCGCAAGATTGGTATCCTTGCGCGCCGACGCCTTGCCAATTGCAGAGAGCGCCG  
CCGCCATCGTCAGTGCTCTACAGAAAACCGGTACACGGCTCTGCCGCGCAGACTCCTAGCCTAAATGTGACAGTGTTGGT  
AATCCATGCCGCCGCAAGGGCGGCGGTGGTGGGCCAATAGATGATTTTCAGAGCCTTACTGCCCGTTGACGCCAATCCCT  
CGAGCGCGAGTCTAGCCGACGCGGCGATGACGGCCTCGCTGTGCTTGTATCCTTGTAGGCGCCGGGTGTAGACGGCCA  
ACACAATAGGTGCGCGCCAGTGGGCCAGACGACGGCATAAGTCAATTTGCCGTGCCATACTCCGCAGGTTCCGGTTTTGTC  
TCCGACTGCCAGTCTGCCGGCACCGCCGCGCGGATGCGGTGGTTGCCGGTCTGTTTTCCCTTAGCCAATCAACAAACTGC  
TGCCGCTGCGGCGCAGCCAGTGCAGAGCCAGTGTGAGTTTTGTAAGCTTTCCGTACGGCGCGCGGCGATGAGGTATCG  
CGCGCATCGCCTGGGATGGCGGAGTTCAGCTCCAGCTCCAGCGGTCCAGACGGAACGTGGTATCGCCGATAGAGCGCATG  
AAGGCCGTACGCCGGCCGGGCCCAACTCCTCAGCAACAAATTGGCGGCGGCGTTATCACTGTATTGCACGGCGGCC  
GCGGACAGCTCCGCCACCGTCATGCCTGTTGTGATATTTTTCCGAGATGGGTGACCACGGAACCAGCGCATTTTTTGCCGTA  
ACGGATGGGTGTGTCCAGCAAGCCGGCCTGCTGCTGGCTGCGAGCCAGCACAGCGGCAGCAAGAAAGCCCTTGAATGAGC  
TGACAGTGGGAAGCGCTCCTCAGCGCGGTAACCTACAGTTGCGCCTGAGCCGGTATCCATCGCGTACACACCGATGGAGCC  
GCCAAAGTCTGTTTCGAGTTTAGCGAATGTTCCGCGACGAGTTGGTTCAGCGCGGTGGCAGAAAAGCCAGCCAGCGGCC  
ATGAGAGACAAGACAGCAGA ACTAGACGGCGATACAGTGACATCAACGATATTCCTTGTGTTGAAGGTGGAGTTACGGACGG  
CCTCAGGAAGTCTGGCCAAGCCCGACTATTGGGGCGCGAAGATAGCACCAGGGTACGCCGGTGTCAACACGGGGTCTG  
ACGCTCAGTGGAACGAAA ACTCACGTTAAGGGATTTTGGTTCATGAGATTATCAAAAAGGATCTTACCTAGGGAAGGTGCGA  
ACAAGTTCTGATATGAGATCATCATATTCATCCGGAGCGCATCCCAGAGGGACATCATGAGCCATCAACTCACCTTCGCCGAT  
AGTGAATTCAGCACTAAGCGCCGTACAGACCCGAAAAGAGATTTTCTCTCCCGCATGGAGCAGATTTTGGCATGGCAGAATAT  
GACCGCTGTCATCGAGCCGTTTTATCCCAAGGCGGGCAATGGCCGACGGCCCTATCCGCTGGAGACCATGCTGCGTATTCACT  
GCATGCAGCATTGGTACAACCTGAGCGACGGTGCCATGGAAGATGCTCTGTACGAAATCGCCTCCATGCGCCTGTTTGCCCGA  
TTATCCCTGGATAGCGCCCTGCCGGATCGCACACCATCATGAATTTCCGCCACCTGCTCGAGCAGCATCAACTGGCCCGTCAA  
TTGTTCAAGACCATCAGTCGCTGGCTGGCCGAAGCAGGCGTCATGATGACCCAAGGCACTTTGGTGGATGCCACCATCATTG  
AGGCACCCAGCTCTACCAAGAACAAGAGCAGCAACGCGATCCGGAGATGCATCAGACCAAGAAAGGCAATCAGTGGCACT  
TTGGCATGAAGGCCACATTGGTGTGATGCCAAGAGTGGCCTGACCCACAGCCTAGTACCACCGCGGCCAACGAGCATG  
ACCTCAATCAGCTGGGTAATCTGCTTCATGGAGAGGAGCAATTTGTCTCAGCCGATGCCGGCTACCAAGGAGCGCCACAGCG  
CGAGGAGCTGGCCGAGGTGGATGTGGACTGGCTGATCGCCGAGCGTCCCGGCAAGGTAAAACTTGAAGCAGCATCCGC  
GCAAGAACA AAAACGGCCATCAACATCGAATACATGAAAGCCAGCATCCGTGCCAGGGTGGAGCACCCGTTTCGCATCATCAA  
GCGGCAGTTCGGCTTCGTGAAAGCCAGATACAAGGGCTGCTGAAAAACGATAACCAACTGGCGATGTTATTACCCTGGCC  
AACCTGTTTCGGGTGGACCAATGATACGTCACTGAGGAGAGATCTCAGTAAAAACCGGAAATAACGCCAGAAATGGTGGAA

AAAATAGCCTAAATAGGCTGATTGATGTGTTTGCGGGAAAAAATCGGCCAGATCCGCGAAATTTAATCAGCGAGTCAGC  
TTGGGAAGAAATGACCTGCTTATTCGCACCTTCCCTAGATCCTTTAAATTAATAAATGAAGTTTAAATCAATCTAAAGTATATAT  
GAGTAACTTGGTCTGACAGTTACCAATGCTTAATCAGTGAGGCACCTATCTCAGCGATCTGTCTATTTTCGTTTCATCCATAGTTG  
CCTGACTCCCCGTCGTGTAGATAACTACGATACGGGAGGGCTTACCATCTGGCCCCAGTGCTGCAATGATACCGCGAGACCCA  
CGCTCACCGGCTCCAGATTTATCAGCAATAAACCCAGCCAGCCGGAAGGGCCGAGCGCAGAAGTGGTCCTGCAACTTTATCCG  
CCTCCATCCAGTCTATTAATTGTTGCCGGGAAGCTAGAGTAAGTAGTTCGCCAGTTAATAGTTTGCGCAACGTTGTTGCCATTG  
CTGCAGGCATCGTGGTGTACGCTCGTCTTGGTATGGCTTCATTCAGCTCCGGTTCCTAACGATCAAGGCGAGTTACATGA  
TCCCCATGTTGTGCAAAAAAGCGTTAGTCTCTTCGGTCTCCGATCGTTGTCAGAAGTAAGTTGGCAGCAGTGTATCACT  
CATGGTTATGGCAGCACTGCATAATTCTTACTGTATGCCATCCGTAAGATGCTTTTCTGTGACTGGTGAGTACTCAACCAAG  
TCATTCTGAGAATAGTGTATGCGGCGACCGAGTTGCTCTTGGCCGGCGTCAACACGGGATAATACCGCACCATAGCAGAAC  
TTAAAAGTGCTCATCATTGGAAAACGTTCTTCGGGGCGAAAACCTCAAGGATCTTACCGCTGTTGAGATCCAGTTCGATGT  
AACCCACTCGTGCACCAACTGATCTTCAGCATCTTTACTTTACCAGCGTTTCTGGGTGAGCAAAAACAGGAAGGCAAAAT  
GCCGCAAAAAGGGAATAAGGGCGACACGAAAATGTTGAATACTCATACTTCTCTTTTCAATATTATTGAAGCATTACCAG  
GGTATTGTCTCATGAGCGGATACATTTGAATGTATTTAGAAAAATAACAAATAGGGGTTCCGCGCACATTTCCCGAAAA  
GTGCCACCTGACGTCTAAGAAACCATTTATCATGACATTAACCTATAAAAATAGGCGTATCACGAGGCCCTTTTCGCTTCAAG  
AATTTTATAAACCGTGGAGCGGGCAATACTGAGCTGATGAGCAATTTCCGTTGCACCAGTGCCCTTCTGATGAAGCGTCAGCA  
CGACGTTCTGTCCACGGTACGCCTGCGGCCAAATTTGATTCCTTTCAGCTTTGCTTCTGTGCGGCCCTCATTCTGTGCGTTCTA  
GGATCCTCCGGCGTTACGCCTGTGCCACAGCCGACAGGATGGTGACCACCATTTGCCCATATCACCGTCGGTACGGCACTGT  
TGCAAAGTTAGCGATGAGGCAGCCTTTTGTCTTATTCAAAGGCCTTACATTTCAAAAACCTCTGCTTACCAGGCGCATTTCGCCC  
AGGGGATCACCATAATAAATGCTGAGGCCTGGCCTTTGCGTAGTGACGCATCACCTCAATACCTTTGATGGTAGCGTAAGC  
CGTCTTCATGGATTTAAATCCAGCGTGGCGCCGATTATCCGTTTCAGTTTTGCCATGATCGCATTCAATCACGTTGTTCCGGTAC  
TTAATCTGTGCGGTGTTCAACGTCAGACGGGCACCGCCTTCGCGTTTGAGCAGAGCAAGCGCGGACCATAGGCGGGCGCT  
TTATCCGTGTTGATGAATCGCGGGATCTGCCACTTCTTCAGTGTGTTGAGGATTTTACCCAGAAACCGGTATGCAGCTTTGCTG  
TTACGACGGGAGGAGAGATAAAAATCGACAGTGCGGCCCGGCTGTGACGGCCCGGTACAGATACGCCAGCGGCCATTG  
ACCTTACGTAGGTTTCATCCATGTGCCACGGGCAAAGATCGGAAGGGTTACGCCAGTACCAGCGCAGCCGTTTTTCCATTT  
AGGCGCATAACGCTGAACCCAGCGGTAATCGTGGAGTGATGCACATTCCTCCGCGTTCAGCCAGCATCTCCTGCAGCTCAC  
GGTAACTGATGCCGATTTTGCAGTACCAGCGTACGGCCACAGAATGATGTCACGCTGAAAATGCCGGCCTTTGAATGGGTT  
ATGTGCAGCTCCATCAGCAAAAGGGGATGATAAGTTTATCACCACCGACTATTTGCAACAGTGCCTTATTTTCGAGCATTCTT  
GCGAAAAAGCCGACCGGGAAAATTGACATGCGTACCATTGCGCTGGGGTGTAAATAAGGCGATAGACACCGGTACCTACACAT  
TTACCTTCGCGGACAAATCAACGTTTTAGCCCGCTACACATTCATTTATGCATGGGACGGTAAAGAGTGAAAAATTTCCACA  
CACCCTCTTCAGCGATGCCTGAAGGGTAAAAAGCTGTGCAGGGGGCGGAATATTCACCGCTCCCTGAAGACTAGCCAATAA  
TCGCGATGCCAAGACGTTCCATGAGCAACGATGCCTGGTAGTTGTCCAACCTAACGCCTTGTAATCAACGCGCCGAATATCTA  
AGTACCCAACTCCGAATTGGTCAGATCGCAATGTGTGAAGTTTGTGCTCGCCAGTCGAAAGTCGAAAACCTCGCCGCCGGA  
GAGATCTGAACCACTGAACGTCGCGCCAGTACCTGGGCCCCATCCAACGGTTTTCCACAGCTCACACTTTTCCAACACGA  
CTTTCGAAAAATTGGCGTAGCTTAGATTTGTGTTAGTGATATATGCACTGCAAAACCAGGTGCGAGTAGTGATCATATTCATAA  
AACTTGCGCCGCGAAAATCTGCGCCTTGCACGACAGTGGCGAATTTCAATGCCAAGCGCACTGGCATTGCGAAAATCCGC  
CATGGATAAATCACAGCTTTTTAAAAATGGCATCTTTCAGCATCGCACGACTAAAATTGCACCCTTTCTGGCTTTCACGATCATAG  
AACTGACAGCCGATAAATCAGTGCCGCTCAGGTCCGGCACCTGAAAATCACAGTTAAAAAATGTACTATTTTCAATTTTCTCA  
CCGGTGAAGCGGTTTCTGTAAATTTTTTCGCCAACGAGTGCCAGAGCCATATTTTGTGCTGTTTTTTTTATACAGTAATGGCGT  
CATGGTAAACCCTGATGAGGTTATGCGTCAAATCCGCCAATAACATCTGCAAATGTGCGTTAAATCTGGTGTTTTTTTCAGCAA  
AGCGCGAAGCTGATGGTAAGTCAGACCCAGTAATTCAGCGGCTTTTTTCTGGTTAAATTTTGCCTGCTGTAAGCTGGTTTGT  
GAAAGTCTTCTCTTGTGCTGCTGGAATTCACGCAGATCCAGCGGTAACCCTACAGACATCGGTTTAGTTTTCCGGCGCCTGC  
GGCTGCGTCTGGTTCTGAAATCCATCCCTGTCGGTGTGCTTATGCAGTCTGGTCCGGACTCGGCGTGCATATAATTACAGCCA  
TTGCCTGGTTGCTTCATGGGCAAAAGCTTGATGCGTGGGGCTTTGTAGGTATGGGGCTCATAATTGCTGCCTTTTTGCTCGCC  
CGATCCCCATCGTGGAAGTCGCTGCGGAGGCCGACCCATGGTGACGGTGTTCGGCATTCTGAATCTCACCGAGGACTCCTT  
CTTCGATGAGAGCCGGCGGCTAGACCCCGCCGGCGCTGTACCCGCGCGATCGAAATGCTGCGAGTCGGATCAGACGTCGT

GGATGTCGGACCGGCCGACCCATCCGGACGCGAGGCCTGTATCGCCGGCCGATGAGATCAGACGTATTGCGCCGCTCTTA  
GACGCCCTGTCCGATCAGATGCACCGTGTTCATCGACAGCTTCCAACCGGAAACCCAGCGCTATGCGCTCAAGCGCGGCG  
TGGGCTACCTGAACGATATCCAAGGATTTCTGACCCTGCGCTCTATCCCGATATTGCTGAGGCGGACTGCAGGCTGGTGGTT  
ATGCACTCAGCGCAGCGGGATGGCATCGCCACCCGCACCGGTCACCTTCGACCCGAAGACGCGCTCGACGAGATTGTGCGG  
TTCTTCGAGGCGCGGGTTTCCGCCTTGCAGCGGAGCGGGTTCGCTGCCGACCGGCTCATCTCGATCCGGGGATGGGATTT  
TTCTTGAGCCCCGCACCGGAAACATCGCTGCACGTGCTGTGCAACCTTCAAAGCTGAAGTCGGCGTTGGGGCTTCCGCTAT  
TGGTCTCGGTGTGCGGAAATCCTTCTTGGGCGCCACCGTTGGCCTTCTGTAAAGGATCTGGGTCCAGCGAGCCTTGGCGC  
GGAACCTCACGCGATCGGCAATGGCGCTGACTACGTCCGCACCCACGCGCCTGGAGATCTGCGAAGCGCAATCACCTTCTCG  
GAAACCTCGCGAAATTCGCGAGTCGCGACGCCAGAGACCGAGGGTTAGATCATGCCTAGCATTACCTTCCGGCCCGCCG  
TAAATATCTCCTTTTGGGTTGTTAATAAAACATCCAATAAGTTGACTGTGCGTGAAAAAGAAAGTTTTGTGTGATGGCGTTGAA  
GATCGCACCGTTAAGCTCTTATGTGGGATGGTGCAGAGCTCGACGACTACCGATAAAACGCAACCGCCGAAACAGACAAGA  
AAAAGCCCAACTGATAACAGTTGGGGCTTCAATTGTGATTGGTGGAGCAATAGCACCTGAACCCAAAACCTTCTCGCTC  
AACCGGTAGTGGCTGATAACAACCTCGTGAGGGCTATTGCGGGTTAAGCATTAGCGATGTCTAGGGCCAGACTGGACGTCTG  
AACGCAAGCCGCTGATACTGTACATAACCACAGTATCAGCGGAGGATACCCATGTCGCTGGCAAGGAACGCCACGGCGAGTC  
AATCGCCCACTCAAACAACGGTTACGAACGCCACCAACCCGACCGAGCGCTGCTTACCAGCTGGTTGAGCAGCACTACCC  
AGCCTTCAAAGCCTCACTCGAAGCCCAAGGTCAACACCTGCCTCGCTACATCCAACAAGAATTCAACGACCTCCTCAATGTG  
GCCGTCTGGAGTATGGTTTCATGCGGGTTCGCTGCGAGGATTGTCATCACGAGCGTCTGGTTCGCTTACGCTGTAAACGACG  
CGGCTTTTGCCTAGCTGCGGTGCCGCGGATGGCCGAGAGTGCAGCGCTGCTGATAGACGAAGTCTTCCCAAGGAGCC  
CATTGCGCAGTGGGTGCTCAGCTTTCTTTCCAGCTACGCTTTTTGCTGGCTCGCCATCCCAAGCTGATGGGCCAGGTCTTGA  
GTATCGTCTATCGTACTCTCAACTCATCTGATCAAAAAAGCCGTTACACCAAAGCCTCTGCACAACTGGCTCAGTGACTC  
TTATCCAACGCTTTGGCTCCGCGCTAAATCTCAATGTCCACTACCACATGCTGTTTTCTCGATGGTGTCTATGCCGAAGATGACTA  
TGGCAAGCAACGCTTCCATCGTGTCAAGGCACCCACTTACGATGAGCTGAATACGCTCGCTCACACCTCAGCCATCGCATCG  
CTCGCTGCATGAAAAGCGTGGGATTTGGAGCGTGATGCCGAGAATACGTGGTTGACACTGGAAGAGGGCGAAGACGATA  
CGCTGACTCAATTACATGGTGTTCGTTACGTATCGCATTGCCGTGCGCCCCAGCAAGGGCGCAAAGTCTTACCCTGCAA  
ACCTTGCCAGGGCGTGAGGATAAAGCCGACTCAAGCAGTCGAGTAGCCAACCATGCTGGTTTCTCGCTACACGCCGGTGTGA  
TGGCCGAAGCGCATCAGCGGGATAAGCTTGAGCGCTTGTGTCGCTACATTAGTCGGCCAGCGGTTTTCAGAAAAACGCTGGC  
ATTAACCGCAATGGGCAGGTGCGTTACGAGCTCAAACTCCGTACCGCAATGGCACCACCCATGTGATCTTCGAGCCGCTG  
GACTTCATCGCCAACTCGCTGCGTTGGTACCTAAGCCGCGAGTCAACCTCACACGCTTCCACGGCGTCTTTGCACCGAACA  
GCAAACACCGAGTTCAAGTAACACCCGCCAAGCGGGCAAGAAGCCCGACAAATCGGAAGGTCTCGATACTAACTGGCGTG  
ACAAGAGTCTGCAGAGCGCCACCGCGCCATGACCTGGATGCAACGCCTCAAGCGAGTCTTCAATATTGATATTGAAGTCTGC  
GAACACTGCGGCGGTACGTCAAAGTGATTGCCAGCATCGAAGATCCGAAGGTTCATTGAGCAGATTCTCAAGCATCTGAAAC  
AGAAAACAGCCAAGGCGAATGCCGCCAAGCAGCGTGAGCTGCCACCAGAACGAGCGCCGCACTGACTCCCAGCCTGTTT  
GATCCATCACAGAGTCGTCTCTTTGACTGACGACCCCAAATCCAACACTGCTCAACACTGCCAACTTTTAAACGGGGCGGTGG  
GGCAGTTTGTATCTCTCGAGCTATCAGGCTAGAGATTTTACCGCAAATCGAACCTTATTAGAGCGGTTTAGGCTGGACCGC  
AGTTAAAATTGGGGCTTGAGCGGTAAACGAGTGAGGGAATTTAGGTAAGATACTTCGGATGAGGAGCAAAAAGGTGGTTT  
ATACTTCTATACCCAGTAGTGTCCCTGTCGGTTTGGTTGGGGTTCGATGCCCACTTTGGGCGCGGCGTTGGGCGCCGCAA  
GATGAAAGCTCTGTGTGAAGGCTTGGATATTAAGACCTTGGATGATTTCAATGCCATCACCGAAGAGCAGATCGTTAGCGTCG  
ACAAATTCAGCTACAAAACGCGCAAAAGTGCTTGCAGGTATGGCTGAACATGCCGAGCTATTCAACAAGATTCAATCAATC  
ATCGGGTTCAAACAGCAGGTCACTTCGGGGGATCGTTTTACCGGTGAGAAGATCGTGATCACCGGTTTTCGTGACGCGCCT  
TGGAGAAGCTGATTGAAGCTGAGGGTGGTGAAGTGCAATCATCAGTCTCGTGAAGACCACCATGGTGATCGCGGCATCCAC  
TTCCGGATCTTCCGGCAAATTGAAGAAAGTGACGATCTCAACAACAGCGGAAAGGCAAATATCAAACACTGATTGATCTGGCC  
ACCTTCCGTAAGCAATATCTGGAACAACCAGCATCGACTGGTTTGGAGTTTTAATGAGTCAACCAACTTGAGCTAATAGTC  
GCTGTGGATTCTAAGTTGGGATTCCGGAAAGGCGGCAAGATTCCATGAAATGCAAAGAAGACATGGCGCGATTTACGCGG  
ATTTCTAAAGAGATCCGCGTGTGCGTTATGGGGAAACACACGTATACTGACATGCGTGACATGCAGTTAGAAAAGGATGGCG  
CCGAGGAGCGAATCAAGGAGAAAGGAATTCTCCCGAACGCGAATCGTTTCGTGATCTCTCGACGTTAAAACAAGAAGATG  
TCATAGGCGCTACTGTGTTCTGATCTTCGTGCTGTGATCAACCTGTATGAGAATACCGATCAACGCATTGCTGTCATTGGTGG

GGAGAAGTTGTACATTCAAGCTCTTTCATCAGCAACGAAACTGCACATGACCATAATTCCAAGAGAGTTTCGACTGTGATCGAT  
TTATTCTGTGATCCGATCCAGAACAATTTTACATTGATTCCAGTGCCAGCGAGACTGTGGAGGCAACCGTTGATGAGACT  
CAAGAGCGCATTACTTTGCTACTTACGTGCGTAACAATCAGTAACGCGCTGGCAGTGGAAGAACAAGAACCAGAAACGAA  
GCAGACGGTGTGGCCGTCTGCTTCGAAACATCATTATTGGCTCGAGAACTGATCGAGAATACCATTCTTGGCGACGACATCC  
AAAACAATACAGAAAAGATAGCTTTGCAGTTGTGGAGCCCTCCCCCAACTTATAATGGGATTATTGCTGGGCTAAACAAT  
GCTGTGCCATGCGTGGGACAGCAAACGTTGAATCGCCATCAAGAGCATCCACAGATTTACGTGCAGCCGTCATCGTTTTATG  
GTGTATAAATGACACCATAGCCGCCCTGAATCAGACTGATAATGCAGTCTTACAGGACGGCGAGTTGCAACAAACACTTGTG  
ATTATTACAACAACCTTATTGGCTGACATCGTTTTGTCGTTTTCAGAAGACGGCTGCACTGAACGTCAGAAGCCGACTGCACTATA  
GCAGCGGAGGGGTTGGATCCATCAGGCAACGACGGGCTGCTGCCGCCATCAGCGGACGACGGGAGGACTTCCGCAACC  
GGCCGTTGATGCGGCACCGATGGCCTTCGCGCAGGGGTAGTGAATCCGCCAGGATTGACTTGCCTGCCCTACCTCTCACT  
AGTGAGGGGCGGCAGCGCATCAAGCGGTGAGCGCACTCCGGCACCGCCAACCTTTCAGCACATGCGTGTAAATCATCGTCGT  
AGAGACGTGCGAATGGCCGAGCAGATCCTGCACGGTTCGAATGTCGTAACCGCTGCGGAGCAAGGCCGTCGCGAACGAGT  
GGCGGAGGGTGTGCGGTGTGGCGGGCTTCGTGATGCCTGCTTGTCTACGGCACGTTTGAAGGCGCGCTGAAAGGTCTGGT  
CATACATGTGATGGCGACGCACGACACCGCTCCGTGGATCGGTGCAATGCGTGTGCTGCGCAAAAACCCAGAACCACGGCCA  
GGAATGCCCGGCGCGCGGATACTTCCGCTCAAGGGCGTCGGGAAGCGCAACGCCGCTGCGGCCCTCGGCCTGGTCTTCAG  
CCACCATGCCCGTGCACGCGACAGCTGCTCGCGCAGGCTGGGTGCCAAGCTCTCGGGTAACATCAAGGCCCGATCCTTGA  
GCCCTTGCCTCCCGCACGATGATCGTGCCTGATCGAAATCCAGATCCTTGACCCGCAGTTGCAAACCTCACTGATCCGCAT  
GCCCCTTCATACAGAAGCTGGGCGAACAACGATGCTCGCTTCCAGAAAACCGAGGATGCGAACCACTTTCATCCGGGGT  
CAGCACACCAGGCAAGCGCCGCGACGGCCGAGGTCTCCGATCTCCTGAAGCCAGGGCAGATCCGTGCACAGCACCTTGCC  
GTAGAAGAACAGCAAGGCCGCAATGCCTGACGATGCGTGGAGACCGAAACCTTGCCTCGTTGCCAGCCAGGACAGAA  
ATGCCTCGACTTCGCTGCTGCCAAGGTTGCCGGGTGACGCACACCGTGGAACGGATGAAGGCACGAACCCAGTGGACAT  
AAGCCTGTTGCTTTCGTAAGCTGTAATGCAAGTAGCGTATGCGCTCACGCAACTGGTCCAGAACCTTGACCGAACGCAGCGG  
TGGAACGGCGCAGTGGCGGTTTTTCATGGCTTGTATGACTGTTTTTTTTGTACAGTCTATGCCTCGGGCATCAAGGCGAGCTC  
AGAGACCATGGAAAGCATGTTCTCGGACTTACGTAGCAACTCGTTTTCTTTTCGAGGTTGAGCCACCTCCGCGCTTCATCAGA  
AAACTGAAGGAACCTCCATTGAATCGAACTAATATTTTTTTTTGGTGAATCGCATTCTGACTGGTTGCCTGTCAGAGGCGGAGA  
ATCTGGTGATTTTTGTTTTTCGACGTGGTGACGGGCATGCCTTCGCGAAAATCGCACCTGCTTCCCGCCGCGGTGAGCTCGCTG  
GAGAGCGTGACCGCCTCATTGGCTCAAAGGTCGAGGTGTGGCTTGCCTCGAGGTGATCAACTGGCAGGAGGAACAGGAG  
GGTGCATGCTTGGTGATAACGGCAATTCCGGGAGTACCGGCGGCTGATCTGTCTGGAGCGGATTTGCTCAAAGCGTGGCCGT  
CAATGGGGCAGCAACTTGGCGCTGTTACAGCCTATCGGTTGATCAATGTCCGTTTGGAGCGCAGGCTGTCGCGAATGTTCCG  
ACGCGCCGTTGATGTGGTGTCCCGCAATGCCGTCAATCCCGACTTCTTACCGGACGAGGACAAGAGTACGCCGACGCTCGAT  
CTTTGGCTCGTGTGCAACGAGAGCTACCGGTGCGGCTCGACCAAGAGCGCACCGATATGTTGTTTGCATGGTGATCCCT  
GCATGCCGAACCTCATGGTGGACCCTAAAACCTTCAATGCACGGGTCTGATCGACCTTGGGCGGCTCGGAACAGCAGATCG  
CTATGCCGATTTGGCACTCATGATTGCTAACGCCGAAGAGAACTGGGCAGCGCCAGATGAAGCAGAGCGCGCCTTCGCTGTC  
CTATTCAATGTATTGGGGATCGAAGCCCCGACCGCGAACGCCTTGCTTCTATCTGCGATTGGACCCTCTGACTTGGGGTTG  
ATGTTTCATGCCGCTGTTTTTCTGCTCATTGGCACGTTTTCGCAACCTGTTCTCATTGCGGACACCTTTTCCAGCCTCGTTTGA  
AAGTTTCATTGCCAGACGGGACTCCTGCAATCGTCAAGGGATTGAAACCTATAGAAGACATTGCTGATGAACTGCGCGGGG  
CGACTATCTGGTATGGCGCAATGGGAGGGGAGCAGTCCGTTGCTCGGTGCTGAGAACAATCTGATGTTGCTCGAATATGCC  
GGGAGCGAATGCTCTCTCACATCGTTGCCGAGCAGGGGACTACCAGGCGACCGAAATTGCAGCGGAACCTAATGGCGAAG  
CTGTATGCCGATCTGAGGAACCCCTGCCTTCTGCCCTTCTCCGATCCGGGATCGCTTTCAGCTTTGTTTCAGCGGGCGCG  
CGATGATCAAAACGCAGGTTGTCAAACCTGACTACGTCCACGCGGCGATTATAGCCGATCAAATGATGAGCAATGCCTCGGAAC  
TGCGTGGGCTACATGGCGATCTGCATCATGAAAACATCATGTTCTCCAGTCGCGGCTGGCTGGTGATAGATCCCGTCGGTCTG  
GTCGGTGAAGTGGGCTTTGGCGCCCAATATGTTCTACGATCCGGCTGACAGAGACGACCTTGTCTCGATCCTAGACGCAT  
TGCACAGATGGCGGACGATTCTCTGTCGCTGGACGTGATCCGCGTCGCTGCTCGACCAGGCGTACGCTTATGGGTGC  
CTTCCGACGCTTGAACGCGGATGGAGAAGAGGAGCAACGCGATCTAGCTATCGCGGCCGCGATCAAGCAGGTGCGACA  
GACGTCATACTAGATATCAAGCGACTTCTCCTATCCCCTGGGAACACATCAATCTTACCGGAGAATATCGTTGGCCAAAGCCTT  
AGCGTAGGATTTGCCCTCTCCCGCAAACGACCCCTAAAAGCCGTTTCTCTGTATAAAAGATCAGCTAAATTATGTGTATTGC

ACAATACATATATGTGAGGTTAGCAGTGAATTTGCCTACGCCGAAACCTACGATGAACTTCAGAGAGCCTACGATTTTTTCAA  
TGAGAAGCTATTCAGCAACGAGCTGCCGCATGCCTGATAACGTTGCAGCGTGAGAAGCGAACGTATGGCTATTGTTCTTTA  
AGCGTTTCGTCGGCCGTGAGAGTGGGTACACGGTAGACGAGATCGCTATGAATCCGGTGTATTTCTCGATCAGAACCATAAAG  
GCCACGCTTTCAACACTGGTGCATGAGATGGTTCATCAGTGGCAATTCATTTTTGGCGAGCCTGGCCGCGTGGCTATCACAA  
CAAACAGTGGGCGGCCGGATGGAACGGGTAGGACTAATGCCTTCTGATACCGGCGAACCGGGAGGCAGGAAAGTGGGCC  
AGAGCATGACCCATTATATTATTGCCGGTGGCCCTTTGATATGGCCTGTGATGAACTGCTGACAGGCCATTTCCGGCTTTCT  
GGATGGACAGGTTTCCGCCTTACCAGCCTAAGCCTGGCGCTGTGCTAAGCCCTACAGGAAAAGGCTATATTGACGACGAGGA  
AGATGATAGCGAACACGAACAGGAGGTGGAGGAAGGGCGCGACCCGGTTGAACTCGACGACGAGATCATAGAGGCCATGC  
GATTTGTAACCCACCGCTGAAGCACCGGTGAACAAAACAAACCGGAAAAGTACAGCTGCCGGTGTGTCATATCAATCT  
CTGGGGTAAACCGGGGATAGTGGTTTACTGTGGTGGCGAGCACTGTAATAAAGCCGCGTTAGTAGTCTTAAAATAAAGTCCTT  
TCGGACTTTATTTTTTTCCATTTCCGAGGTCGTGATGTTAATGCTGTACTTCGCGGCTTCTTTTAAAACAGTTTTAGCAAG  
GCTTGCTGGTATCCAGACCTGAACTAATTTAATGGTTCGCCGTTCTCGGCTTAAAGAGTGGTGTCTGGTACAAATCCCAGAT  
TCGCTTAACGGTGTGGAAATGTTTTGCTTGAACGGCCTACTCGCATGGCTACGTCTGATGATTTCTCACCTTTGACAAGCAC  
GGAATAGCCAATATCTGTTGTGATGTGTGCAAAGGAAGCCATTTGCGGCAGCAGCTGTTTCCATTCTGTTTCTGAAATTCTGTT  
TTTCTGAGCCATCTGTGGCGCCTCCGTAGTTTTGGTTACAGAAAGGATATACTCAGAATAAACAGGGGTCAATACAAGTACGA  
TTTTTATAAACTTTATTTTATTTGAGGGTGAAGCCCGTGCAGCAGCAGCGGGCCTCGATGGTGCCGCGAAGGTGCTGGC  
GCCATGCTCGGATTAACATGAACCGTGAAGAACTGCGAAACTGTTTTTCGCGTCTGAGGGGTTGACCGAGCCGCGAA  
GCGGCGCTGGTAAGCGATGATATGCACATATCCACAGGCATATTTTTAAAAGGGCACTGTTGCAAAGTTAGCGATGAGGCA  
GCCTTTTGTCTTATTCAAAGGCCTTACATTTCAAAAACCTGCTTACCAGGCGCATTTCGCCAGGGGATCACCATAATAAAAT  
GCTGAGGCCTGGCCTTTGCGTAGTGCACGCATCACCTCAATACCTTTGATGGTAGCGTAAGCCGTCTTCATGGATTTAAATCCC  
AGCGTGGCGCCGATTATCCGTTTCAGTTTGCCATGATCGCATTCAATCACGTTGTTCCGGTACTTAATCTGTCCGGTGTCAACGT  
CAGACGGGCACCGCCTTCGCGTTTGAGCAGAGCAAGCGCGGACCATAGGCGGGCGCTTTATCCGTGTTGATGAATCGCG  
GGATCTGCCACTTCTCACGTTGTTGAGGATTTTACCCAGAAACCGGTATGCAGCTTTGCTGTTACGACGGGAGGAGAGATA  
AAAATCGACAGTGCGGCCCCGGTGTGACGGCCCCGGTACAGATACGCCAGCGGCCATTGACCTTCACGTAGGTTTCATCC  
ATGTGCCACGGGCAAAGATCGGAAGGGTTACGCCAGTACCAGCGCAGCCGTTTTTCCATTTACAGGCGCATAACGCTGAACCC  
AGCGGTAAATCGTGGAGTGATCGACATTACTCCGCGTTCAGCCAGCATCTCCTGCAGCTCACGGTAACTGATGCCGATTTG  
CAGTACCAGCGTACGGCCACAGAATGATGTCACGCTGAAAATGCCGGCCTTTGAATGGGTTTCATGTGCAGCTCCATCAGCA  
AAAGGGGATGATAAGTTTATCACCACCGACTATTTGCAACAGTGCCTGGTGCAGGAGTACAGCAGATCGACGTCAACGCCGA  
GCAGCGATTTAGTTCTTTCAAATCGCCAAAGTCCAACAACGTGGCACCGGGCAGCGCATCGACCAACAGGTGAGGTC  
GCTGCCATCCCGTCCGTGCCATGCAGCACCGAGCCGAAGACGCGCGGGTTCCGCGCGCGAAAGCGGCCTACCGCTTAC  
GCACTGCGCTTCGCTTCATGTCAAGCACAAACAGACGGTGCATGCGCATCCTTTCTTATCGAAACTCGTTGAGATGATATGCAA  
TCAAGAATAGAATTTCAAGAACTCACAAGTAACGCGGTGGTTAATATCCTGTACCCACGGATTGCCCTTAGCGCTGCCTATAT  
CGGCTAAAGCACTCCGGTAGCTTGATTCACCCACGGCCACGGCAGGATCTTGCCGTCGCAAGCGCCAGGGGAAAATCTT  
CAGCTGCAAGCCTGAGTGATTTTCATGTGCGTGAATCCATCGCCCAGATGATTTTTGTGAAGAAGAACTCGCGCTCGTTTCATG  
TCCGGGCGCGCTCCTGGCCCTCCGTGCCAACGGCCAGCAAGTAATCGGCCTGAATTGGCAGTATCAGCGCGCGTAGTAAGT  
CATGGATCGCCGGTTCGCGCAGTCTGCGCGCCAGATTAATTACCCGGTCAACTTCAGTTTATCCTGCTTGCCTTGTCCGGTCT  
GCTCCATCAGATTTTCATGGCCCCCTTCTTCATGCTCATGCTCATGGGTGTGTTCTTTTCCGGTATGGCTCTGTTCCGCCTGAGAC  
GTCTGCGGATGGCGTAATCGTTCGTAATGCTGCTGTCAAAGTCGTAGTCTGATGCTTCGGCATAATGCTCGTAATCGGCATAC  
TCCTGCGCGTCCACTGCTGATCGTGGCAGCAGCATAATCATGGGCCAGCTCTGCATCATTTTTGCTGTGCTTCATGACGCCG  
AGGCCAACGGAATCATCCATAGGGTCTGCTTAAGATGAAAGGCGTCTCTGCGTTGCTCACCGGCTGATAATCAGTGCCGGT  
TGTCATGTTATGTTTCATCGGGTTTCTGGTTAAACGCCATGCTTTCCCCGTGGCTTCTGGCAGACCTTTTTTTCAGCTGATCGGGT  
TTCTAAACTGGTATCGCGCCAATATCCTTAAACCTGGCCTCAAGCCAAAGAAACGGTCAATTTCTGCGGCCGTGGTTTTCTG  
GGCTGTGCGGCTCACGCTCGATGCCAAAGATTTTTTATCGTGGTAAAATTTCCACCTCATGACGCGCACGCGAAATACCA  
ACATAAAAAACGTCCTTAGAAGTGGTAAGCGATTTGGTATCTATGTTGAACAACACGCGATCACAGGTAAGCCCTGGGATTT  
GTGGACGGTGGTTGCATAAGCATAGGAAAGATAAGAAGCCTGTTTTTGTCCAGCTCAACCGTGCGCCCTTTTTTGTCTCAA  
GCGTCAGTTTTTACCCTCCACGGTTTTTACCCTGAAGCGTGCGCCGTTGGCAACGTCCAGCGTTTTTATCGTTACGCGTTACC

ATAACCTTATCGCCCGGCGCCAGTTCGGCGCTGACTGCCTGGTATACAGACAGCTTGGTGTGTGTACGCGGGCTGAAAGCGA  
TCTGCTCACCGCTGCTGCTTTCAACCGTCAATTTGTTGCCCGGCCGGTATCAAGAACCTGGTAAGACTCGCCCGCTTCATAC  
CATTTTTGTAATCCTGTTTCGGGGATAATGATTTGCCCTTTACTGAAATAACGGCTGTCGCGGGCTTCCGCTGTGTGCAATCCA  
CGCGGTCAAGTAGCGTGAACGTTTCGCCGGTTCGGGCAAGCCCCAGATTGCCCGGATGTAGTCATTGAGGGTTTTGCGTGA  
GGCGTTCGTACCAGAGATTATCAGGGTGGCATCCTGTTGTTCTGAGGACAGAGACAGGTAGCGATCGGCAAGTTGAGCGAG  
TCGGGGCGCTTCTTCCTTCAGTTCGTTACGCCGGTGATATTTTTAGGGCGCGCGCGGCATTACCTTCAGCGGCATACTTAA  
CCGCCTCAAGCAAAACTTCATTCTTCTGTGCTGAATGTCTTTCATGTAGCTGGTCTGCATATCTGCTTAAATCAGCTGCTCAA  
AGGCTTACCGGCTTCTACCGCTTTCGTCTGTGACGTATCCCCAGGAATACCGCGCGAGCGTTATGCTTCTCGATCACCTCCAT  
CAGCTGTTTCATCTGTGCGGGCGGGTATAACCCCGGCTTCATCAATGAATACGACTGATTTTTTCATCCAGCTTTTTATCCTTCGCT  
TTGAGGAAAGCGGCAACGGTGCGGGCCGGTAATCCATCATCTTCAAGCGCTTTTTTCTGTGTCCCATAGGGGGCCAGCGCCG  
TGACCTTCAGCCCTTGTGACTCCAGCAGCTCTTAGCGGCCATCGTCATATAGCTTTTACCGGTACCGGCGTAACCATGTGCGG  
CCACAAACCGATCTTTGCTCGTCACAATTTCTGTAACCGCGCGCATCTGCTCCTTCTTGAGGGTTTTCCCGGCAAGCAGCTGG  
CCTGCAATCTCTGCGGTGAGTGTGCGGGCATCTGCCCCGGCCGCGTGATTGATAGTCAGAATGGAACGCTCAAGGCGAA  
TACCCTCCACGGTAGTGACGCGGTGGCTGGTCTTTTTAAGCCTGCCGTTTTTAATACCATCATCTACCGCAAAACGGGCTTTAT  
CCGCACGCATCCCGCTATTCGTCAGCGAGTCGATCCACTCTTTCGCGCTCAGAGTTTTCGGCCATAACTGAAGCACCGACCTTC  
AGAGTTGATTGATACCGGGCTTCGCCCTCGATGATGGCGCCCTTCTGTACCGCCTCAGGTACGTTTTTCAACATCGGCTATT  
GTGGCATGGCCAGCACCTGCTTATTAGCGATTTGAATCAGCTTCTGGCGTTCAAAGCTGGCATCGCGCTCTGACAGCGACTT  
AACTGCAAACCTGGATAGCCCGGTGAGCTTTAACCTCCGGGCTGGTAAAATCCGGGGCCATGTTGCGCGCTATATCAGCTCCA  
GAGGTTTACCGTGTCCCTGCCATTCACGTTATCAAATCAATGCCGAGCGTTTTTGGCGGGCTGGCCATTCTGGTGAATT  
TCTTACGGGAATGCTCTGTTTTCTTTTACGCGTAGCCATCGAGACGCGGCTTTTTCTGTCTGAGCATCGGCGGTTTTCCCGCGT  
CAGACCCATTGCAGCGAGTCCCTTTTTCAATTTGCTCCGACCGCGGGAAAAAGCGCGAATCTGTTTCATCTGAAAAATGGGCC  
ATATCGAACGTGTTATTTTTGCTGTTGTAACGCAGCTCATAACCGGCTTTGGTCAACTCCAACGCCAGCTCCTGTTTGTAACAT  
CGCCAGGTGCATTTTGTTACGCATCAGCTCATATTTTTGAGCGCGCGCCACTGGCCGTCTCGCGCTGGGTGCATGTTGCATG  
ACAAAAGCGTGTGTGTGCAAATCAGGATCTAGCGCCCTGGAAGTTTCTGTGGCGGAAAGTAGCGACGACAAGGTTATTGGTAT  
TCTGGGTTACTGATTTCCCTGGCGAGTCGTCGGGCTGCGCGAGTTTTTTCAGCTTCACGCACAGCAGCGGCAACAGCTTT  
TTCATGAGCCTCGATAATGTTTTATCGCCGTGTATCAGCGCCTGCATGGATACCCCTTTAGGCGCTGAAAACGTGAGGTCGTA  
GCCAGACGCTTTTTTTGGCATACCCACGTGTCGCTGCATATGCGTGAAGGTATCTATCTCTCCGACAAGCAGCTCTTTAAA  
CCGGGCTGATTCAACGTCCCCGATAAGCCGAGGGCTTCAGCTCCGGTTCCTGCCAGGACGTGAATGATGAATCCTTACTGT  
AGTAATCATCCTTTGCATCAGAGTAGTAGCCACAACGCTAGTGACGTTCTGGCGGGTAATCGTGGTTATATCAAGCATCAGAT  
CTCCCTCAGTTCAATGCCAGGAACAGGGTTTTTGGCATGGTATTTAACGTGTTTAGCCTTGAACCTTAGCGACGGGCATATCACC  
AGGCAACGCCAGATAGCCGGTGAGGTTTGGCAACATTGATATTTCCGTAGGCGTTACGGCACGAACAACCTTAAACGTGCGGG  
CGTTTACGGACAATCCAGGGCTTCTGAGGATCGGATTCTTTACGCTCAACTTCGCCTTCTATCTCACCAGTGAGCGCGACATT  
TGATCCAACGTTTCATCACCGAGACGGCTGCCGCCAGCACGATGTTAGAACGCATGTTAGCCAGAATTGTCTGAGCCATATC  
CCGACCATAAACCTTAAACAGCTGAGAATAGGTTTGATAGCCAGCATAAACACACAGACCGCTTTTACGCCCTTTGGTCAAGT  
CATCGTTGAGGTTTGGCAGAAACTGGAGTGATTCCAGCTCGTCAATAAATACATTAATGCGGCTTTCTTTTTTACCCATAACCA  
GCACGATAGAAAAATCGAATCCAGCCAGCAGGAAATTAGCGGATTAAGTGACCTTTTCAATTTCTTCTGCCAGGTGATAAAC  
AGGGTCCCGGCTTTCCATCATCAAGCCAGTCACGCAGGGAAAAATTACCTTCCGGCATTTCATTAATGTGGGGCAAGATTCTT  
ACTGAGAACAAATCGCGCGCTTCCAACCTGCTTTTTTACAGCCGGAAAAAATAGCTTCGGCAGGCGTCCCCATTAAAAATTCTT  
TTAATTTTTTCTGGTCAACGTTACAGGCCAGTGAATAACTTCTTCCATAGTTACTGTGCTGTATAGGCTGTGAAGTTTTTTTGA  
AACTTACTAAAAATAAGACGGCCATAGCCGAACCATTTCTCAGTAGCCATATCAGGGCTTTCCTGAACAATAGAGTTCACTAA  
ACGCTCGTAATCATATGAACGGCGAATTTTATTGAAAAACACCCAGCCTTCAGTGCGTTTATCATAGGCGTTTAAATAACATC  
GCCGGGACGATAGAAATCTTTAAGAACCCCCATTGGATCTAAAGCAATATTTTTGCCGCTCTAATGATGCTCTTAAATAAC  
AGTTCATTGAAAATTGTGGTTTTTACCAGTACCGGTTGTACCGGCAATCGAAAAATGCAAGTTCTCAGCGTATGTAGGTATGGG  
GATATTAGCCACGGTTAACTGGTTGACACCTCTTTCGCGTGTTTTATCAGCGAGTGTCTGCGCGAACAAGCTCTGTACCAC  
GATAAATCTTTTTGAATCTTTCGCCTTTAAACACGCGTGATTTATCATAAATGATAAAAGCGATCAGACCGCCAACACCAATAAA  
CCAGCCAGCAATTAAGCTGACCATAAAGGCCATAGCGAAAAAGTATTCTTAAACAGATACGGAATCAGGTATTTAGCCGTGG



ATGGATCAATACCGTAGGTAATTTTGGCAACTAGAAACCATACCATCACTGGAGGCAAAGTAATTGCAAATAAAAATGCTAAGC  
CTCTTTCTCTATCGTCCATTTAGCGCTCCTTTTTTGGTTCCAGACTTTGTAGCCGTTACGTTCAACCTCTGCTTTTGCCGCTTT  
GGTTTTGCCCAGTTCTGCTATCGAGCGCAGGAGGATTAGCGTTTCAATAGCGAGTGATTTCATGCAACATCATCTGCTGCTGCCG  
GTGGGAATTTTACGCCAGATAGCGTTTCGGTTATTGCCTTCAGCTCATCGCGCAGTGGGCCAAAATCCGCATCTGAAGCACGG  
TCAAAAAGATAATCCAGTTTTCGATTACGTGCTCAGCCGGTCGGCAACTATTTTCAACCCGGACTCCCGATCACCTGGGCC  
AGCTTCAATGCAGCGCCGCAGATAATCTGACCGATTACCTCCTGAAACCAGGTCTATATAGGCCAAAAGTTCATCTGATACTTT  
TGCGGTTATTATTGGCATTTCAGTCTCACATTGTGCATTTCTTAAACAAAAAATTGGGATCTAACAAGCTGAAATCTTAGTATTA  
CCAAAGTAATAAAGCAAACCTATTATAAAACAATGGGTTATTGGGTGTTTTTAATACCTAATTATTACCGAATATTGACGCTATTT  
ATTTTTTTATCTTTTAAATCAGTACGATAGCGTGATTTATCGCGCTGCGTTAGGTGTATAGCAGGTTAAGGAAAAAAATCATCT  
TTTTTGGTAGGAGCGACCTCCGTAGGTTAAGGGTCATTTGGCTAAAAAGCGTCCTATTCTTTGATGGTCATGCTTGCATGACCA  
TCTGAGCAACCAAAAACACTACAGATAAACTACAGAGAACTACAGATAAACTACAAAAACGATTTACCTTAGCGTTGTCAGAC  
TACTAATAGACTACAAGGAACTACAAAGAACTACAAAGAACTACAAAGAACTACAAATAGACTACTAAAACCGTGGCA  
GACTACTAATAGACTACAAGAACTACAAATAAACTACAAACTGGATTGACCCCTTCTTACGAGTGTTGTAGAGTCATCTTC  
ATACAACGGAGGGGTTATGAATAAACAGCAGATCTGAAACCCCGCAACTTATCGGCTGCTGTCAGATTGCGCCTAAATGAA  
ATCGAGAAGTGGCTGGACAGAGGGCTAACGCGCATGAAATTGCTGAAATCCTCGACAGCGAATACAGCTTTTCGGTAACAG  
CCAAAGGGCTTGAGATGGCACTGTATAGAACGCGGCAAAACCGAAAAAATGTATTGCACAATACACATGATAAGAGTAGCGC  
GAAGGGTGCAGCGGAAAGTGTATTGCACAATACACAACCGTCTGAGCCTGAAGCGCAGGAAAGTGAAAAAGCAGAGAGTC  
CCGGCATTATTGATAAAGAGTTCTTCAATAAAATCGGTGAGGATTTCAACCCTAAGAAGTTCAACAAAAAATTCTGAGGTGAT  
TTATGAAAGTAGCGGTAATTAATTACAGTGGCAGTGTTGGTAAACATTAATTTTCATCTTACCTGTTAGCCCGCGCCTGACTG  
GTGCAAAGTTCTATGCGGTAGAGACTATCAACCAGTCTGCTCCGATCTGGGTATTGAAAATGTGACCAGTTTTAAAGGTGAC  
GACTTCTCACGTTTGATTGAGGATATTGTTTTGAAGATGCAGGCATTATTGATATTGGCGCGTCAAACGTTGAAGCGTTCCTG  
ATGGCTATGTCTCGCTTTGACAGTGGCGCGAACGAATTTGATAAATATGTAATCCCGGTGACGCCGATAATAAGGCGATTGAT  
GAAAGCCTGAAAACGGCACACACGTTAAGTAAAGCGGGCGTGAGCAGCAAGAAAATTATCTTTGTTCCAAACCGTATTAGTC  
CAGACAGTGAAGTAGAAGATGTGCTGGCGCCGGTGTGAGTTGTCAAAGAAACGAAGATTGGCAAATAAAGCAAGAAG  
GCTGTTATTTATAACAGTGAGGTTTTCGAATATCTGGCGTTTCACCGTATCTCATTGGAAGTATTGACCGCTGAAGATCCAGAA  
GAATTCAAATCCCGTGCAAAACAACAACCGATGCTGACGAGCGCAAAAAACTGGCACGCCGTTATACATACATGAAACAGG  
CGATTCCGGTAAAAGCTAATCTCGATAAAGCATATGCGGCTTAAATGGGAGAATAAAATGGAAAAGCAGCCGGATAAATTAGA  
AGTTCTGATGGACTGGTTTTTAGGTGACGCGAAGGAAATCACCGCAACTCAGAAAGAAATGACGCAGAACTTTCTGAGCTT  
TCGGAAAAGCTGGCAAAGACACCGAAAGTTTTAGGAGAGACGGCAGACTCTTTTAAACGGGCTTTAGTAGAAAACAGCG  
TTCAATTAGCCTGGCAATTAGTGATGCTAAGGCGCGGAGGAATTTCTAACTAAATTCGCGCGCGCAGGCGTCCAGTG  
CTGAGACGTTTACCCGTCAGATCCTTTTTATTACAGCTGGCTGCACCATCGTGGGCGCCGAGTAGGCGCCGCGATAGCGATA  
CTTTTACTGAGATAAAGCAAACCGGGCGTGTCCCGTTTTTTTTGTCAAAGCGGAGCGCGGAGGCCGAAGGCCGGAGGCATTA  
GTGGCCGCCGCCGCGTAAGCGGGGCGAGACGGGAACCGGCTCGAAGCGCAGCACGGCAGAACGGCCCCGCAGGGGCA  
ATGCCCGTTTTAATTCATCGTGACAGTCGCGCGTGACCATCACGGGAGAAAAATAATGAATGACCGACAGCGAGAAGTGGC  
CCGTATACGCCAGGCCCGCCGCGCGGCTCAAGGAAGAAGGCACAAGCGTGACAGTCACGCTAACAAAACAGGAAG  
AAGCAATGTTGCAGGAGCTGTGCCGGGTTCCGCTCCTGGACGAACGCCTATTCAACGAACGAATTTTTCCAGCTGCTGCT  
TATCCGCAACTGGCAGCAGTGGCAGGAGCAGAAGGCACAGCTGGGAAAATGCCAGGCTTGCGGAAAGCTGAAAGCGGAG  
GGGGGGTGCAGGGTGAACGGAAAGGCGAAACCTTAACTGCTGGCTTGCCTGCGAAGCCAATGAACTAAATTTGTAGTGT  
ATTGTGCAATACACATTTACACAGAAACAAAACACCGGCAATTCCTGGAACCGGATACCTACGGCTATTCTGGGTGAACG  
GTACTTTTTGCACCTGGGTGCGCTGAAAAAGCTGAATATGCAGGGTGACGTTTCGCGTGCTGTTCTGCTTTGTAGACTGAATGC  
GCCAGCTATACGCTGACTGCTTAAACCTGGTAAAGTTCTGCAACCGGCACTGACCGGAAAGCAAGGCAGGGAAGACCTAA  
GCCAGAAACCTTGACTGCTCCCCGCCCTCAGGGCGGGGATTGCGGATCATGTTCTTCTTTTCCAGGGATTCAACGCAGACA  
AGAAAGGCTTTCAATTTCTATACGTGAACGGCCGCGCAGCGGAAAGAAACAAGCCCGGTCAATCCGGGCTTGTCTTTAG  
GCGGCTCAGAAATCGCCTAAAGGCCCGGCTTGCCGGGCGAGTCAGTGCTATTTAGTTTGTGTCAGCAGCTGGCTTAATTTG  
CCGCCAGTGCATACGTGATTGAAAGCGCCTTGACGGCGCTGATTAGGCAGCTGGTTGAACGCTTCGAGGCAGGCGCGCA  
GCAATAATCTTTCTGAGATTGACTTCTTTTTTTCAGTTGGGAAGGGGTGGTAACTGTAGTCATGCTTGCTCCTTAGTGAGCCG

ATATCGGCAATTTTTCGGGTGGCGGTGTTGCCTCCCGATGATTTAATTATCGGTGATTATGCTTTTAAAGTCAATACAGGTACGG  
AATTTATTTACCTGTTTTTATGCCCGTCAGGGCATGGAAGGCGACCGCGCCGGACTCCACCGGACACCGGCCGCAAATCGCC  
GGAAACTGCGGGACTGACCGGAGCAACAGGCCAACCCCCCTCCCTGCTAAGCCATAACCCAGCCCCGCCACGCAGCTGC  
CGCACGTCCCCACGGGGGTGCGCAGTGGGCGCCGCGCGCCTGCGCGCGGGTACGGCGGCCCGCCTGCGGGTTCGCGGGC  
CCGTAAGTGGAGTTAGCGGGCCGCGCGCGCCGGTTACGGGGGACACCGCACAGTACGGCCAGTGCCCCGCTGAGCTGC  
ACAATCCACGGATAACACAATAGCGCACTGGCAAAGGATGCCGACGCCTGAAGGGCGTGGGCACCCCGAAGGGGCGGGG  
GGCCGCTTGCAGCCGGGCGAGTCCGGCGCAGGGTGTGGCCTGCCAAGCGGAGCGCGGAGGCCGAAGGCCGAGGCGTT  
AGCGGCCGCTGCCCGCTAAGCGGGGCGAGACGGGAACCGGCTCGATGCGCAGCACAGCAGAGCGACCCCGAAGGGGTA  
ACGCCCCGTGTGGCATCAGGATTTAGTGCAATGGCAGAACATGAGCTGGAGAGATCACGGCAAGCAGCAGCAAAGGGG  
GGCACAGCCGCCCGATGGCTGTTTCCGATACCGGCGATTAATTAGAGCGGTGTTAATATCCCCGCGTTGCGGGGACTA  
GGTTTCAGCAAGTCATGTTAAATACGTGTCCATCATGTAAACTGAAATCCCCAATAAACAGATCCCGCGCATAGGCTACGATGT  
CAAATATCGGGTACGGATTCCGGAATATCATTAGTAGACCGCTATCATTAGGTTTCTCTGCAAAAGTTTCTTCGTCCT  
AGCTTCGCCCATATAGGCATCTCTAAACAGGTGAAATCAGTGCTATTAACAGATCAACAAAGGCCACAAACGCCGCTTCGT  
TACCTTCTCGCGGGCTTGTAAAGCCGTTAATAAAATCCCAGTTGATATGGCACTCTGACGCCATACCAGACGGAATACCCT  
CCCAATCTTGAACATAAATTCTGGATCAGCCTCATTTGCGTGTAACTCGCGGCAGCGCTCGTAAACTCCTCTGAGCTATCAA  
AATCGGTGAGATCGAGCCAGGCTCCCGCAATGCTTCCGAGTTGATTTATGGTAAGTGCCAACATAAACAGAAGGGGTCGTA  
ATATCAGTCATGGTGTACTCCTTAAAGCGCCGATACCGGCAATTTTTCGGGCGGGCGGTATTGCCTCCCGATGATTTAATTATCGT  
TGATTATGCTTTTAAAGTCAATACAGATACGGAATTTATTTACCTGTTTTTATGCCCGTCAGGGCATGGAAGGCGACCGCGCCG  
GACTCCACCGGACACCGGCCGCAAATCGCCGAAACTGCGGGACTGACCGGAGCAACAGGCCAACCCCCCTCCCTGCTAAG  
CCATAACCCAGCCCCGCCACGCAGCTGCCGCAGTCCCCACGGGGGTGCGCAGTGGGCGCCGCGCGCCTGCGCGCGG  
GTACGGCGGCCCGCCTGCGGGTTCGCGGCGCCGTAAGTTCGAGTTAGCGGGCCGCGCGCGCCGGTTACGGGGGACACCGCA  
CCGTCACGGCCAGCGCCCCGCTGAGCTGCACAATCCACGGATAACACAATAGCGCACTGGCAAAGGATGCCGACGCCTGAA  
GGGCGTTGGCACCCCGAAGGGGCGGGGCGGCCGCTTGCGGCCGGGCGAGTCCGGCGCAGGGTGTGGCCTGCCAAGCGG  
AGCGCGGAGGCCGAAGGCCGAGGCGTTAGCGGGCCGCTGCCCGCTAAGCGGGGCGAGACGGGAACCGGCTCGATGCGC  
AGCACAGCAGAGCGGCCCGAAGGGGTAACGCCCTGTGTGGCATCAGGATTTAGCACAATGTCAGAACATAAACTGGAGAG  
ATCACCGGCAAGCAGCAGCAAAGGGGCGGCACAGCCGCCCGATGGCTGTTACTTGTCTTTGTGCGGTAGCACTTTGATTAG  
GCCGTTACGGCCGTAATCAGAGCGGCCAGCGAGGTGATGATTTGCGGTAGGTTTTCGAGGATGGTAGAGGTATATAGCAC  
CTGTAGAGAAGTTGGCGGGGTGTCGTTTTCCGACGGCCGACTGTAACCGGGCGAATAAGGCAGGTTGTCAACAGCTTGAGC  
GAAGCGTCTGTTGACAACCTGCCGCGCCCGTTTCACTGCGGTCATAGGCGGAACGACCCACGCCAACGGAACGGCTTTAT  
GACCGGGCAGCTGAGATACCGGCGAACCTGGCTGGCGGCTGACGCCAGCCGCCAAGCGCCAGCGCGGAGGGCAAAGCCC  
GGAGGCCAAGCGGAGCGCGGAGGCCGAAGGCCGGAGGCCGAGGCGTTAGCGGCCGCTGCCCGCTAAGCGGGGCGAG  
ACGGGAACCGGCTCGATGCGCAGCACAGCAGAGCGGCCCGAAGGGGTAACGCCCGGAGTCTGCCGCTGTTTATCTCTCGT  
TCCATCTGAAATCGGCGGTAAGGCCATTAAGGGTCAAGTTTATCAGGGAGGCGTTAGCCCCCATGTTGTTAATCATCAGGC  
AATATCGTCTTTGTAGCAGGCATAACCGAAGCTAAGCTCTGTTTTATATAGTGGCGGGCAAAGTCCCAGGCATCGTGGCCGA  
AGTCCTCATAATCTGCCAGGACGATTTGCGGGGCTTTGTGCCATTGCTGTACGGAAGAAAGCGGCAGAACAGGGCAGGGT  
GCGACCAGTCAGTGACGGTGTGTCAGATCATATCTGCCAGACGCTCCAGGGAGCCGTAACACAGCTCTGTGCGCAGATCCGC  
CACCATGCGTTGTTTACGCAGTGATGCCAGATAATCAATCTCTTTGGTTATATCAGAATTAAGCGGGTCTGGTAATCCATGATG  
TACTCCTTTGCGCGCCGATACCGGCAATTTGCGGGCGACGGTGTGCTCCCGATGATTTAATTATCGGTGATTATGCCCTCA  
AAGTCAATATAAGTACGGAATATGCATGCATAATTTTATATCTTGCAAAGCGTTCATAGAGTGCTGAATCGCTTTCTGACAGCC  
TCAATAAAAAAAGGCGGGGATTCCCGCCTTTTTTCTTACAGCTGCTTACGTGGCTTTTTACGCGTCATATAACGGTATCGCG  
CAGTCTACCGCGTACAAAAAGCACGCCAGCGCGCCGCAACCGTACAGAAACGCAAGCGGCTTATTATCGAAGTAGCTGAAAA  
CCCCTGTGCGCGCACACAGGCCGAGAACAGAGACGCAGGCGCAGGTGATCTGCACCAGATCCCTGTATCCCGCACGAACGAT  
AAACCAGGGCAGGGCAAGCGCAGCGGCGCTAATAATTAATGCGAGAGGGACAAAACGAGATAGTGATACATGTGAACTCC  
TTGATGGTTGCCGATACCGGCGATTGTTGCGGGCGGCGGTATTGCCACCCGATGATTTAATTAGAGGTTTTGCGCGTCCAGGAG  
ATTGACCTGAGCCGGGTAACGTGAAACTTTTCCCCTTATGGATCACGTTATGCGGGGCGCTAATTCATCACTGATAAAGCT  
AACCGGGTAACGTTTTTACCAGCAATCCGCTCGCTAAACCATGCCACTTTTGGCGTGGCCGATCCACTGGATGAACAATCA

CACCGGCCATGCTGCAACCCGTTGCGGGTTCGTCCAGCGTAATGCTTACCGGGACTGTATCCCGGTAAAAAACTTAACCGGC  
GGCACACCTGCCTGCGTAGCGGCTGCGACAACCTGCAAGCCCGATAACCGCTATCCGATTAATAAGCATTTTATTCCCCTTACTC  
ATGCTGATACACCTTGCCAGCTGTTACCAGTTTACGAAATCACTTTTCATGAATTTACGCCCATGCTCAAGCGTTGAATACAC  
GTTGCCGATAAGCCAGTTACCAGCCGTTTTTGTCTCGGTATACCACCATGCTTCTGTGTCAGAGTAAGCAGCGGTTGCTATCCTC  
GCCCTTCTCATAGATCCAGATTTTAGTGACGTCTTACCCTGTTTCGTTGCTGCCCTGAATGGTAGGGTCAAAGGTATGTTCAATC  
TCTATATCGAAGTAACGCTGAAGGAAGTTAGTAAAGTGCATGACGACTCCTGTAAGCGCCGATACCGGCAATTTTTCGGGTGG  
CGGTGTCGCCTCCCGATGATTTAATTATCGTTGATTATGCTTTTAAAGTCAATACAGGTACGGAATTTATTTACCTGTTTTTATGC  
CCGTCAGGGCATGGAAGGCGACCGCGCCGGACTCCACCGGACACCGGCCGCAAATCGCCGGAAACTGCGGGACTGACCGG  
AGCAACAGGCCAACCCCTCCCTGCTAAGCCATAACCCAGCCCGCCGACGAGCTGCCGCACGTCCCCACGGGGTG  
CGCAGTGGGCGCCGCGCCTGCGCGCGGGTACGGCGGCCCGCTGCGGGTCGCGGCCGCTACTGCGAGTTAGCGGCCG  
CCGCGCGGCCGTTACGGGGGACACCGCACCGTACGGCCAGCGCCCCACTGAGCTGCACAATCCACGGATAATGCAGGAG  
ACGAATCATGATAGGAGGCTGAAGGGGAAATGAGCGGCAGCAGGGGAAGGGTTGCCAAGCGGAGCGCGGAGGCCGCA  
GGCCGAGGGCGTCAAGTGGCAGCTGCCCGCGTGAGCGGGGCGAGACGCGTAGCGGCTCGATGCGCAGCACAGCAGAACGG  
CCCCGAGGGGTGACGTCCGGGGTTCGCTTTTAAAGATTTTCGACCACATCAGTAAATCGTAGTGACACCATGAAGCAAAA  
GTATCGTGACAGACCAGAATCAACAACAGTAACAGCAGACCTTTTTTTTCGACGTAATAAAACCGGCCCAAAGCGCCCGCAAG  
AAGCACACTCAACACGATTTCCGTTATACTAATCGTATTATAATCTCTCACGTTTCCCTTTTTAGAACTCTGCCACACACAGATA  
AAACCTTATAACAAGCTACAAAACCCGTTATTTCAGACGCGGTAATGCCTAGTTTTTTTTGCCAGTATTTAGATGACAAAGAAAC  
CCTTATCCACTTCCCGTTACAAGGTGAATGATTGTGGCTTCATGCCCTTAAACAGAGTGGGATATTAACCTCACGCTGAATGAT  
ATGCGTCTCTCCATCATTTCCCGTACGCGCAATTAGGCCCTCTGTAGAACAGGGGTTGATACTACTAATGTTGGTGTGTTTTCG  
GTTTTGTTGAGCATCGCTGATCCTCAAATATCGGTTTGTGTTACGTCTGCCGCTTTGCGCTGGATAAGCGACTTAAAGAAATCC  
GACGCCCTCAGAATATCGCTATCCTGGAAGTCGGGAAATGTCGCTTCTGTGAGCTCCTGCGCCGTACCTGCCCGTATAACGGTT  
TCATCGCGGATCATCGTTGCTTAAACGCCATCAGCCTGTTTTTGTGTAAGGAGTGCCGGAAAATAATCGCGTATTGGCCGCC  
GCTATCCTGATGAACAGAAGTATCCAGCGATGATTACCCTGTTTACGATAGTGGTGATAGATTTGCTGGCCGTAGCGCTCCTG  
ATCGGAATTACGGTAATCGAACATTAACAGTTCAAAAGCATTAAACCGATCTGGCAATTGCCAGGCGGTAGGGTGTGAAAGTG  
TCGCTAACATAGTTTCCCCTGAGCGTGACAGTCACGATAAGGCGGGCTTTGCCCGCTGTTATCAGTTAATCAATGGCACGA  
TAAATACGATTCTGGCTTTCGTTCTCCAGCGTATTAACGTACTCCCACAACAGGTGATACCGGTTAGCCATCGTTTCGTTTCAGTT  
CGGCTTTGCCTTCTCATATGCCAGGCCGCAAAAAGTAACTGTAGGCATAACAGACAAACAATAATCCCTACTTCGCGCGCGCTG  
CATTACCTTCAAATAGTTAGGTAACGAGAGCCAAAGAGGTTGGGGCGCTTCCATAAAAAACGCGCCATTGCTGGCCTGAA  
GGTATTCCAATACCCCTCCCTGGTAGTCTTTAGCGTAACGATTCAGAAAGGACTGAATGAAGTGATCTGCGCTGAAGAAAGCG  
CCACGAAATGCCGAGGCATGAAGTTCATGCGGGCGTTTTTCAGAAATGTAGCGGGCGGTGATTTGATAGTTTTCCATGATACT  
TCCTCTTAAAGCCGATACCGGCGATGGTTAAGCGGCAGGCACATCACCTGCCACTTTTTAATTATCGTACAATGGGGCGTTAA  
GTCAATATAAGTACGGATTATTTTACCTAATTTTTATGCCCGTCAGAGCATGGAAGGCGACCTCGCCGGACTCCACCGGACACC  
GGGGGCAAATCGCCGGAAACTGCGGGACTGACCGGAGCGACAGGCCACCCCCCTCCCTGCTAGCCCGCCGCCACGCGGC  
CGGTTACAGGGGACACTGAGAAAACAGAAAGCCAACAACACTATATATAGCGTTGTTGGCAGCTGAAGCAGCACTACATA  
TAGTAGAGTACCTGTAAAACCTGCCAACCTGACCATAACAGCGATACTGTATAAGTAAACAGTGATTTGGAAGATCGCTATGAA  
GGTCGATATTTTTGAAAGCTCCGGCGCCAGCCGGGTACACAGCATCCCTTTTTATCTGCAAAGAATTTCTGCGGGGTTCCCCA  
GCCCCGCCAGGGCTATGAAAAGCAGGAGTTAAACCTGCATGAGTATTGTGTTTCGTCACCCTTACGCAACTTACTTCTACGG  
GTTTCTGGCTCGTCAATGGAAGATGGCCGCATCCATGATGGTGACGTAAGTGTGTTGATCGCTCGCTGACGGCCAGCCACG  
GCTCAATCGTAGTCGCTGCATCCATAATGAATTTACCGTGAAGCGGCTACTGCTGAGGCCAGACCCTGCCTGATGCCGATG  
AACAAAGATTTTCTGTGTAACATTGACCCGATAATGAGAGCGTTGAAATCTGGGGAGTGGTTACGCATTCCCTTATCGA  
GCATCCGGTATGTTTGCCTGATTGATGTCAATGGCATGTACGCCAGCTGTGAGCAGGCATTTAGGCCAGATCTGGCAAACCG  
AGCAGTGGCCGTTTTATCCAACAATGACGGCAACATTGTGGCCCGTAATTACCTGGCGAAGAAAGCGGGCCTGAAAATGGGC  
GATCCGTACTTCAAAGTCAGACCATAATCGAGCGTCATAACATCGCTATTTTTAGCTCTAATTACACTCTCTATGCCTCCATGTC  
GGCCCGTTTCGCGGCCGTAGTTGAGTCCCTTGAAGCCACGTGCAACAGTATTCAATCGACGAGCTTTTTGTTGACTGCAAA  
GGGATAACGGCCGCATGAGCCTTGACGCTTTCGGGCGCCAACCTGCGCGAGGAAGTCAGGCGACACACAACGCTGGTATGC  
GGGGTCGGTATTGCCGTAAGACGCTGGCGAAGCTGTGTAACCACGCTGCAAAAACATGGCCCGCTACTGGCGGGGTG

GTTGCTCTGGACGATGGCGCCAGACTGAAGAAATTAATGAGCATCCTGCCGGTTGCGGAAGTCTGGGGCGTCCGCCATCGTA  
CAGAGAAAGCACTCGCCACAATGGGGATCAAAACGGTGCTGGATTTAGCCAGGGCAGATACGCGCCTAATCCGTAAAACATT  
CGGCGTTGTGCTTGAAGAACGGTACGGGAGTTGCGCGGCGAGGCTTGCTTCAGCCTGGAAGAAAACCTCCTGCGAAGC  
AGCAGATTGTTGTGTCGCGCTCATTCCGCCAACGCGTAGAAACCTGACGGACATGCAGCAGGCTGTACCCGGATTTGCAGC  
GCGCGCAGCTGAAAACTGCGTAATGAGAGGCAATACTGCCGCGTCATAAGCGTCTTTATCCGTACCAGTCCTTATTCAGTGC  
GTGATACACAGTATGCCAATCAGGCAACCGAAAACTGACGGTGGCAACCCAGGACAGCCGCACGATAATTCAGGCAGCAC  
AAGCCGCGCTGGCGCGGATCTGGCGGGAAGATATTGCGTATGCAAAGCAGGGGTTCATGCTGGCAGATTTTAGCGGGAAG  
GAGGCCAGCTTGATTTATTCGACTCTGCTACGCCTTCAGCTGGCAGCGAGGCTTTAATGGCTGTTCTTGATGGTATAAACCG  
GCGTGGAAAGAGCCAGCTTTTTTTTTGACGGCCAGGGCATCGATAACTCCTTTGCCATGCGTCGTCAGATGTTGTCACCTGATT  
ACACGACAGACTGGCGCTCAATACCAATAGCCACCATCAAATAATTACCGGCGCCGTACACGGGCCGGTTAACCCCTCAACCG  
GCCGAAACAAGTTTCGGCACGGTTTCGCGGTTTTCGGTAAGCCGTTTTCTCTGTATAAAAGATCAGCTAAATTATGTGTATT  
GCACAATACATATATGTGAGGTTAGCAGTGAATTTGCCTACGCCGAAACCTACGATGAACTTCAGAGAGCCTACGATTTTTTC  
AATGATAAGCTATTCAGCAACGAGCTGCCGCCATGCCTGATAACGTTGCAGCGTGAGAAGCGAACGTATGGCTATTGTTCTT  
TAAGCGTTTTCGTCGGCCGTGAGAGTGGGTACACGGTAGACGAGATCGCTATGAATCCGGTGTATTTCTCGATCAGAACCATAA  
AGGCCACGCTTTCAACACTGGTGCATGAGATGGTTCATCAGTGGCAATTCATTTTGGCGAGCCTGGCCGCCGTGGCTATCAC  
AACAAACAGTGGGCGGCCCGGATGGAACGGGTAGGACTAATGCCTTCTGATACCGGCGAACCGGGAGGCAGGAAAGTGGG  
CCAGAGCATGACCCATTATATTATTGCCGGTGGCCCTTTTCGATATGGCTGTGATGAACTGCTGACAGGCCATTTCCGGCTTTC  
CTGGATGGACAGGTTTCCGCCTTACCAGCCTAAGCCTGGCGCTGTGCTAAGCCCTACAGGAAAAGGCTATATTGACGACGAG  
GAAGATGATAGCGAACACGAACAGGAGGTGGAGGAAGGGCGCGACCCGTTGAACTCGACGACGAGATCATAGAGGCCAT  
GCGATTTGTAACCCACCGCCTGAAGCACCGGTGAACAAAACAAACCGGAAAAGTACAGCTGCCCGGTGTGTCATATCAAT  
CTCTGGGGTAAACCGGGGATAGTGTTTACTGTGGTGGCGAGCACTGTAATAAAGCCGCGTTAGTAGTCTTAAATAAAGTCC  
TTTTCGACTTTATTTTTTTTTCCATTTCCGAGGTCGTGATGTTATTAATGCTGTACTTCGCGGCTTCTTTTAAAACAGTTTCAGCA  
AGGCTTGCTGGTATCCAGACCTGAACTAATTTAATGTTTCGCCGTTCTCGGCTTAAAGAGTGGTGTCTGGTACAAATCCCAG  
ATTCGCTTAAACGGTGTGGAATGTTTTGCTTGGAACGGCCTACTCGCATGGCTACGTCTGATGATTTCTCACCTTTGACAAGC  
ACGGAATAGCCAATATCTGTTGTGATGTGTGCAAAGGAAGCCATTTGCGGCAGCAGCTGTTTCCATTCTGTTTCTGAAATTCTG  
TTTTTCTGAGCCATCTGTGGCGCCTCCGTAGTTTTGTTTACAGAAAGGATATACTCAGAATAAACAGGGGTCAATACAAGTAC  
GATTTTTATAAATTTATTTTATTTGAGGGTGAAGCCCGGTGCGGCAGCAGCGGGCCTCGATGGTGCCGCGAAGGTGCTG  
GCGCCATGCTCGGATTAACATGAACCGTGAAGAACTGCGAACTTGTTTTCGCGGTTCTGAGGGGTTGACCGAGCCGCG  
AAGCGGCGCTGGTAAGCGATGATATGCACATATCCACAGGCATATTTTTAAAAGGTATTTTATAGATTTTTTATCTTTTTAAAGTC  
TTTTAGAGCTATAACTCATTGATTTAAAATCATAAATAAGTGTATCTCTGGGAATCCGCCACCTTGTATGGGAATTGGCCC  
ACCTTACTATGGGAAACAGCCACCTTACTATGGGAATTAGCCACCTTGTATG

>pQEB1\_merTn-IS4321

GGAATTGGCCCACCTTAGACGAAACTGTAAAAAATGTATTTACTTGTGTTGAACTTTGTGGTAGTGTGGAGAGTAATTTTTAACC  
CACAAAGGCAAGGCGCATGGATAAGTTGCTGAACAAAAAGATAAAAGTTAAGCAGTCTAACGAGCTTACCGAAGCTGCTTAC  
TACCTCTCGCTAAAAGCAAAGCGGTTCTCTGGTTATGTCTTATGCAGACGTATTTACAGCTTCAGTAAGCGAAGATGATGAT  
GAGATGGCTGTACTCGGTGACTCTACTTTCAAAGTAAAGGTGGCTGACTATCAGCAAATTTTTCAGGTAAGCCGTAACCAGGC  
TATCAAGGATGTTAAAGAAGGCGTGTGTTGAGTTAAGCCGTTCTGCGGTAATCTTTTACCCGAAAGAGGGGGCGTTTTGACTGC  
GTCGCGCGCCCCTGGCTAACAGAGGCTGGCAGCCGATCAGCTCGTGGTATCTGGGAAATCGAATTTAACCATAAACTCCTGC  
GGTACATTTACGGCCTGACGAACAGTTCACCACCTACTCGCTCCGCGATTGTGGCAGTCTTCGAAATCCCCGGACGATCCGC  
CTTTATGAAAGTCTTGCTCAATTCAAATCTTCAGGCTTATGGGTTACTACTCATGCTTGGTAAATGACCGTTTCTTTTTGCCGG  
AATCCCAACAGAAGAACTTGGCAGAGTTGAAACGATCTTCTTGTATCCTGCACTCAAGCAGATAAATGAGAAAACACCTTTA

CTTGCTAAGTATAGTATTGATGATTCAGGAAAATTTCTGTTCTCAATAATTGATAAGCAAATCCCGTCTGACATAAATCAGCAC  
ACATGAGCCTGTCATTTGACAAATTTTTGTCATGAAGATGGGCGAATTTCCACACAGCACCGGCGCCCGGCAAGATGGGCGG  
ATTCCACACGACAGCGGCGCCCGGCAAGATGGGCGGATTTCCACACTACAGCGGCGCCCGGCAAGATGGGCGGATTTCCAC  
ACGGCAGCGGCGCCCGGCAAGGTGGGCGGATTTCCACACGGCAGCGGCGCCCGGCAAGGTGGGCGGATTCTCACGCGGC  
AGCGGCGCCCGGCAAGATGGGCGGATTTCCACACGGCAGCGGCGCCCGGCAAGGTGGGCGGATTCTCACGCGGCAGCGG  
CGCCGGCAAGGTGGGCCGATTCCCACGCGGCAGCGGCGCCCGGCAAGGTGGGCCGATTCCCACGCGGCAGCGGCGCCCG  
GCAAGGTGGGCCGATTCCCACGCGGCAGCGGCGCCCGGTAAGGTGGGCGGATTTCCACACGGCTGCCGCGCCCGGCAAGG  
TGGGCGGATTTCCACACGGCAGCGGCGCCCGGCAAGGTGGGCGGATTCTCACGCGGCAGCGGCGCCCGGCAAGATGGGC  
GGATTTCCACACGGCAGCGGCGCCCGGCAAGGTGGGCGGATTCTCACGCGGCAGCGGCGCCCGGCAAGATGGGCGGATTT  
CCACACGGCAGCGGCGCCCGGCAAGGTGGGCGGATTTCCACACGGCAGCCTCGCCCGGCAAGGTGGGCGGATTCCCACACG  
GCAGCCTCGCCCGGCAAGGTGGGCCGATTCCCACGCGGCAGCCTCGCCCGGCAAGGTGGGCGGATTCCCACACGGCACCG  
GCGTGCGGCAAGGTGGGCGGATTCCCACACGGCACCGGCGCGGCAAGGTGGGCCGATTCCACACGGCACCGGCGCCCG  
GGCAAGGTGGGCCGATTCCCACACGGCAGCGGCGCCCGGCAAGGTGGGCCGATTCCCACGCGGCAGCCTCGCCCGGCAAGG  
TGGGCCGATTCCCACGCGGCAGCCTCGCCCGGCAAGGTGGGCCGATTCCCACACGGCAGCGGCGCCCGGCAAGGTGGGCG  
GATTTCCACACGGCAGCGGCGCGGGGCCAGTGGGATTCAGGAGAATAGGTGTTTTACCGAATGCCCTGACGAGGCGTAAAA  
AAACCGCTTGGCGGCGCCTCATAAAGCAGAAAACCCGCTCAAGGCGGGTTATCTGCTCTGTAGCCTGTGATGCTTCGCGGG  
CATCCGGCATAACAGCGAGGTGAAATCTTCTTTTTGGCATGTTAATTATACGCTAACGCGGCATATGATCAAACCTGTATTAAT  
AAGCCACTGTACCGTTTATAATGCTCTCAGATCAAAGAGGTAAAGCCGTTTAGCCGCTGTGTGATGAGCCAGTTCAGACTC  
TTCAAATCGAATTTGGTACTAACAGGACCCGAACCGTGGGCAAGCACACGGCAACGGTATAGCCCTCTTCCGTTTCGCA  
CCCGGAAGCCTGGGCGGCAGCGTGGTAAATCTTCTTTTTGGTTAAGTGAATGGCATAACCGGATGGGCGGATTAGAGGAA  
AGGGGATTGCCTAGTAACCTACGCGCCACAGAGATGGAGGTGCGGGGAATGATTGAGCTGATTATCGCTATTCTGACCTTAAT  
TGCGGCTGTATTGCAGTTGATCAACTGGTTCCTTTAATGGTGCCGGAGTCTGTGAAGGTGAAAGCCTGAACGGGCAAACTG  
AAAGTTTTATAGCCGTCCTTCGGGGCGGCTTTTTTCGGCAAATTAGGGTTTTACCGAATAATGCAGAGTTTTAAGGTGAGA  
ATTTGCAGACTTGGCGTTTTACCGAACATAGATACTCCCTAGGCTGATAGGTGCATTAGTTATCACCTACCTGAACATATTGTA  
AAAGATGTCAGTCTCCAGTACTTGTGTACTATCAACTGACAAGACTCTTACACGCAACGCAGGGGGATGGAGTTTTATGCTT  
AGAAAAATAATCAGGGGTAGCGGATTCCTCAGTCAGAAGAAAACTGATAGAGTTCGCTGATGATGCTTTTTTTGGTCTTTG  
GTCTTATCCTAATGTTTATAGCGATGAGGGTTACTCTAAAATAAAATGGGAAAGAAGTTAGTGACTTATTAGTTATTTTTGAT  
AAAGATATAATAATTTTTCCGATAAAGCTATTACATACAATAAAAACAAAGATCCTAAGGTTGCATGGCAGAGATGGTTTTAA  
AAATCAGTCATACAGTCTTGACACAGTTATTTGGCGCAGAGAAGTTTATAAAAGATCATCCCGAAAGACTTTTTGTTGACAA  
AGAATGCTCAGTTAACCTCCCCATTAAATAGATAATTCTTTAATTTTCAATTTGGTGGCCGCTACTAATAATATTCAGATCCGG  
CGATCTCGTACTTTGACAAAATAGAAAAAGGCAGCTCTGCTACTTTAGTTAACATATTTCTTTAAACGCCCATCAATGTCTAGA  
AAATCCATTTGTGTGCGGAGACGTTTATCCTGATAAGACTTTTGTCCATATACTTGATGAGACTGCCCTAAAACACTGTTAACC  
GAGTTAAACACAGCAACTGATTTTCAATGGCTACCTTAACGAAAAAGAGGGTTGTAAGAGAAAGAACATTATTGGTCAGCGCT  
GGGGAAGAAGAGACTCTTGCTGCTTACATTATGGGTGATAAAACCATAATATCAAAGAAATTATTGGAACGATCAAGGGAT  
GACCATAACCGGAAGGTGAATGGAAAAACTATAAAACCACTTTCAATTATCAATATCAGCTCTCAATGAAAAAGGGTAGCGTTT  
TCTGGGATAACCTAATCCACAACCTTCTCGACAAGTATATTGTCAGCTAACGTTGGTTTTTTTTAGTGAAATTGAATTTTCTACACA  
TGAATTAGGTGTTAGAGAATTAGCCAAAGAAAGTAGGCAATCTAGATATTACCTTTCAAAGAACTTTAAAGAGAAATTA  
CAACTCAGCCTCATCTAAGAACGTCAAGAATGGTCAATCAATCGATGAGCCTGGAAAGTTTTACTTATTCCTTTTTTTCTAA  
CGATAGCAAGTTGAGTTACTCTGATTACAGAATTCAACGTATATCTTATATAAATGCTTATGCTGAGGTTGCCTTTAATAA  
TACA GACATATTAATAAATAATTAATTAATGCAACAGAGCCGCAAATACAGAAGGAAGATCTGAAGACCTAATATATAGCATATCCCC  
AGAGAAATTTACCAAAGAGCAAATGAAAAAGCCAAAAGATTATCAAGAGAATACAAAATACTAAGTGATTTTTTACCTACTA  
AAACGACAAAGAGCGATAACTTTAAATCAGTTATATCAAAGGTGAAAAAATAGGGCGGAATACACCTTGTCATGTGGCTCC  
GGTGTAAATTTAAAAAGTGCCATGGTGCGAATAATTAGCATTATTGTATGTATAACGGTAATGGCGCGGCAGAGAAACCGGC  
GCGTTCTGCCCTAGTGTTGGCCTGCGGGTTCCCCGCACCCGCTGTATGTAGTATCGGCAGCATCTGAGAAAACCACTACATGT  
AGTTATCAGCGCCACAACGGCGCGGGGACGAGTGCAGTTTCGGAAAAATTGGGGTTTTACCGAATCCGGCAAAGATTGCTT  
CCTATAACGTCCGCTTCTGGCACACAGCAGCCGTTAAGATGTAAGGCCTTACGCCAACTAAATCTAATGGGACAGATTTAGTTG

GTGATGGTCAAGTAATCTGCAAACGGTCACCAAGTAAAATGCAAATGGGTAGTCAAGTCCGATGCAATTACGCACCCGGCAA  
GGTGGGCCGATTCCCACACGACAGCAGCGCCCGGCAAGGTGGGCGGATTCCACACGGCAGCGGCGCCCGGCAAGGTGG  
GCCTATTCCCACACGGCAGCGGCGCCCGGCAAGGAGGGCCGATTCCCACACAGCACCGGCGCGCGGCAAGGTGGGCCGAT  
TCCCACACGACAGCAGCGCCCGGCAAGGTGGGCGGATTCCACACAGCACCGGCGCCCGGCAAGGTGGGCCGATTCCCAC  
ACGGCAGCGGCGCCCGGCAAGGTGGGCGGATTCCCACGGCAGCGGCGCCCGGCAAGATGGGCGGATTCCACACAGCACC  
GGCGCCCGGCAAGGTGGGCGGATTCCCCACGGCAGCGGCGCCCGGCAAGGTGGGCGGATTCCCCACGGCAGCGGCGCCC  
GGCAAGATGGGCGGATTCCCACACGGCAGCGGCGCCCGGCAAGATGGGCGGATTCCACACGGCAGCGGCGCCCGGCAA  
GATGGGCGGATTCCCACACGGCAGCGGCGCCCGGCAAGATGGGCGGATTCCACACGGCAGCGGCGCCCGGCAAGGTGGG  
CCGATTCCCACACGACAGCGGCGCCCGGCAAGGTGGGCGGATTCCCACACGACAGCGGCGCCCGGCAAGATGGGCGGATT  
CCCATATCGACATGTATGTAGCTTGTGTTATCCGTGGATTGTGCAGCTCAGCGGGTCGCTTGTCTATGGCGTAGTGTCCCCG  
TAACCGGCCGCGTGCAGCCGCTAACGCGCAGTACGGCGCCGCGACCCGAAGGCGGGCCGCGTTCCCGCGCGCAGGCGCG  
CGGCGCCACTGCGCACCCCGTGGGGGACGTGCGGCAGCTGTGTGGCGGTGAGCGGGATTAGGGCTTTGCAGGGAGGG  
GCTGGGTGCGGCGATACGTTACGATTGCGGTTTCCGGCGATTGTCGGCCGGTGCCCGTTAACTCCGGCGTGGTGCCTTC  
CATGCCCTGACGGCATAAGAAAATAAAACCGCCATGCTGCGGTCATTCATGATTTTGTGGTGTAGCGATAAATAGTCATGCGAG  
AAACGTTGAAGCGCTTAGCAACTGCACCAACTGTCATTTAGGATCAGCAAGTAAGATTCTAATTTGTTTAAACATCTTCTCAG  
AAAGTGACGGTTTTCTCCCTCCCACACGGCCCTTGCAGTGCAGCTGCAAGGCCTGAGCGCGTTCTTTCAATATTGCGGTTG  
CGTTCAAAGCTAGAGAATATCGCCATCAGATGAGTATAGATTTCCCTATAACTGGCGCATTGTGTCTATTCTGTCTTATGATGG  
CTATGAAAGTTATTCCGCGTTTCTTCAGGTCGTCGAGTAAAGTAATGACTTGACCCAATGAACCACCGAGCCGATCTAGTGCC  
AAACTACTAGGGTATCTCCCTCGCGCAATGCTTTAGGCGAGTTCTCCAGTTCCAGCGCACCTTTTTTGTGCGCGCTTTGGGCCG  
CTACGTGAGGTCTGATCCTGATAGATTTGCTCACATCCAGCTTTTGTAGTTTCGTC AACCTGGTGCGCCACATCCTGAAGATGC  
GTAGATTTACGTGCATAGCCGATTTTCATTCTTTTTCTCGCTAATTAGTTATGGGGTTATTGTTATGTTGATACAGTAACGAGTTTT  
GTTACATGAGGGGAGTCATTTTTCGGGAGAAGTCAGGACTTTTCAAGACTGTCACAAAACCATCGTTTTTGATACATTAATT  
TAACCAATAGGTTGCAGATCAAATCGTCTGTAACAGCCTTTCTGGCTGTTTGTATATAATCATGAAAAAATGGTGAGTAGAGTT  
TCAGGGTAACAGGGGATGCTTATGTCGTTTTCCACAACCTGGCTACTTGAGATCGCATGTGAGAATTACTTCGTCTACATCAA  
CGCCTTTCCGCCAACGATACCGGCGCAACAGGTGGTACCAGGTAGGGCTTTATATCCCTTCAGGTATCGTTGAAAACTCTT  
TCCGTCTATCAACCATACCCGTGAACCTTCCGTTTTTCTACCCGCACATGTGTATCGCATGATTGCCCTGACAGCGA  
AGCCCGGCAATTTATTATAACAGCCGTCAATTTGGTAAAACCCGGAATGAAAAAAGGATTACCCGCTGGGGTAGAGGCAGC  
CCACTTCAGAATCCTGAAAATACAGGGGCTCTGACGCTCCTGGCTTTCAAGCTTGATGAGCAAGGGGGGACTGTAAGGAAG  
TAAATATTTGGGTATGCGCCAGCACTGATGAAGAGGACGTCATTGAGACCGCTATTGGTGAAGTTATACCCGGAGCGCTTATAT  
CCGGCCCCGAGGACAGATTCTAGGCGGACTATCTCTACAGCAAGCGCCAGTAAATCATAAATATATTCTACCTGAAGACTGG  
CACCTGCGCTTCCGTGCGGAAGTGAATTTATCAGTATGCAGCCAGCCATTATGTGAAAAATTCCTTGATCCGGATGAGCA  
ACTTCTTGACCGCCGCGCGTGGAGTACGACATATTTCTATTGGTTGAGGAACTGCATGTTCTGGATATCATCCGAAAGGAT  
TTGGCTCTGTGGATGAATTTATTGCGCTGGCCAATTCTGTGAGCAATCGCCGTAATCCAGAGCCGGGAAGTCTCTGGAAGT  
CACCTGGAGCATCTATTATTGAGCACGGCCTGCGACACTTTGCGACGCGAGCCATCACAGAAGGTAATAAAAAACCCGATTT  
CCTTTTCCCTTCCGCGAGGGCTTACCACGATACTGAGTTTCCCGTAGAAAATCTGCGCATGCTGGCAGTCAAGACTACCTGTA  
AGGATCGCTGGCGTCAGATACTGAATGAGGCCGATAAAATTCATCAGGTGCATCTGTTTACTCCAAGAGGGAGTTTCTCTG  
GCTCAATATCGGGAGATGCGGGAGTCGGGTGTCAGATTGGTCGTGCCATCATCGCTGCACAAAAAATACCCGGAGGCGGTG  
AGAGCTGAGCTAATGACGCTAGGTGCGTTTATTGCTGAGCTGACAGGGCTTTACGCGAGATATCCATAGATTATCTCCCGCAT  
AAATACCCGGGAGGAGCGATCAGATTCGTTCAACCTTGCACGAATCGGCATTAACCGTTTTAGGATATAAGGTTCAAGCAGTT  
TGGCTACGGCTTCAAACACGGGCACCACTACGGAGTTACCGAACTGCCTGTACGACTGAGTGTCTGACACAGGAATGCGAAA  
AGGCCTGCCATCTACTTTTTCAAACCCATAAGGCGCGCGCACTCGTGGAGTACGCTGCGGGGCCGATGCGCCTGATTTTCT  
TCGTTGCGGAAGTCTGTTTCACTGTGGCCATATCCCAGCCACGGTCTATCAGAATTCAGACCCGCTTTTGTGATAGCGAGCA  
GAAAGCGTACGGGCAATGCTTTCTTTATTTTTCAGGATTAACGAGGCCAAAACCGAATCCGTTACCCTTAGCTGCGTGCTTTTT  
GGCGTAGTTATAGAGATACTCCAGAGTTTTCGGCGTCAGTATATATTTGCTGTCAACCACGGGTTCCAGCGTTCCGCCAATGAC  
GGACGCTGTTCCGGATAAAAACGACTAATATCGCGCAGGGTAAAGCCCTGGTGAATGTTTCAAGATCACGACGGAAACCGACCA  
AAACGATACGTTCTCGGTGCTGAGGTA AAAAGTGCTTTCCGTGATAACTTTAGGATCGTTTTTGCCTATCTCAGCTGCATCCG

CAACTTCATAGCCCAGTTCGTCGAGGGTATCCATGATGACTTTAAAGGTTTTACCCTTGTCATGGCTCTTCAGGTTTTTAACGTT  
TTCAAGAACAAAGATGGCAGGTTTTTTTTGCGCGTATAATACGCGCCACATCGAAGAAAAGCGTTCCTGAGCCTCACATTCGA  
AACCATGCGCGCGCCGAGCGAGTTTTTCTTGCTTACGCCCCGAAGGCTGAACGTTGACAGGGGAAACCTGCTAGAAGTA  
CATCATGATCCGGCACATGCTCATTAAATGTAAGCATAGGCATCGTTTTCAGGTACTTCAGGTTTATCACTGAGCGTGACTTCCCG  
AATATCGAGATTGAAAGTGTTTCTGAGCATCGTTAAACCAGTTAGCTTTATATGTGCGCACAGCCTCTTTATTCCATTCACTG  
GTAAAAACGCACTGGCCACCGATGGTTTTCGAAGCCCTTCCGTATACCTCCAATCCCAGCAAACAGGTCAATAAACCGGAAGG  
CATAGTCAGGGTGATGTGCAGGCGCTTCCGGAAGCATTTCGTAGAAGTTCCTCTTCGGCTAACGTCAGCGTCTTAGGTGAG  
CACTTACCATAATCCAGCGATTAAGAGTCTCGCGACTCCACTCATTTTTACCAACTTTTCTAAGCAGTTCAGCCACGTACTTCT  
GGTCATAGATTTCCAGCACCTGCCCCGAGCAGCTTTTTATAATTTTCTGTGCGAGTTGTTCTTCCGCTTCTGCTTTCTCAAGCAG  
ATCCTGCGCCAGTAATTCAAATTCAGACATATTGCCTCCATTGGGTCTTATGGGTGAAACTGTATCACTCATTTGACCCAGATTG  
AATGTTTTTATCTGGATATTTAAACAGGTTTATTGTTAGGTAACGCACGTTGGCCACGCTGGAGCGTCTTCTGGGCCTGCTGTC  
GGCCTTTGAGGTGCTGGTATGGATGACGGATGGCTGGCCGCTGTATGAATCCCGCCTGAAGGGAAAGCTGCACGTTATCAGC  
AAGCGTTACACTCAGCGCATTGAGCGACATAACCTGAATCTGAGACAACATCTGGCAAGGCTGGGACGGAAGTCACTGTCGT  
TCTCAAATCGGTGGAGCTGCATGACAAGGTCATCGGGCATTATCTGAACATAAAACACTATCAGTAAGTTGGAGTCATTACC  
GGTCTCTTTGTCTTTTAGTGATTCTATAAACCTCATTACGTCTGAATATAAAAATCTATTATTTGATTTATGTGGCTCATGAGGTT  
GTGGGATGGTCTTGTTTTTGAATGTGCCAGTTTTCTTAATGGCAAAGATTAATTCACCTTCTGTTATTCTAACATTTTCAGCAA  
TGTTTTTGCTTCTATAGTTACTGACTTCATTAATTAECTCTCATGGTATCGATTTTCTTACC GG CATCTTTAACAAATGGTGCTCG  
TTTCTAGTGTTGCTGCGGTACGCTTCATCATCGTCTGCGGGGCGGTTGCGATAGTGAAGGAGCTGCCGGGCGTGAGCAAATC  
TATCAGGCGCTGGCCGCTGATAATCTCCATCCGTTCACTGGCAATACTGACAGATTTTGAACCTGCGCCGTTTTCCCGGTATG  
GCAAACAGACCGCGACAGTTATGACGTTAAGCAACTTCTCGAACTCCTGTACGTGCTGTAAAGCAATATGGCCGCGATAGC  
GTTTAGCCTGAATAAGATAGCGATATTTTCTATTATTACCTGGCCGTCATGCCTCCATCGCCGGTATAGCGTTTTGTTTCTGATG  
GTTCTGAAGCCATGCGCGGCTTTGTTGAATAAATCGAACTTTTGCTGAGTTGAAGGATCAGATCACGCATCTTCCCGACAACG  
CAGACCGTTCGCTGGCAAAGCAAAGTTCAAATCACCAACTGGCCACCTACAATAAAGCCCTCATCAACCGTGGCTCCATA  
ACTTTCTGGCTGGATGATGAAGCTATTCAGGCCTGGTATGAGTCGGCAACGCCTTCATCACGGGGAAGACCTCAGCGCTATTC  
TGATCTCGCCATCACCACCGTTCTGGTCATTAACCGCGTGTTCAGGCTGACCCTGCGGGCTGCACAGGGTTTTATTGATTCCAT  
TTTTACTGATGAATGTTCCGTTGCGCTGCCCCGATTACACCAAGTGCAGCAAGCGCGCAAAGTCCGTTAATGTCAGTTTTCA  
AAACGTTACCCGGGGTGAATCGCGCATCTGGTGATTGATTCCACCGGGCTGAAGGTCTTTGGTGAAGGCGAATGGAAG  
TCAAAAAACACGGCAAAGAACGCCGTCGTATATGGCGAAAGTTGCATCTGGCCGTTGACAGCAACACACATGAAATCATCTG  
TGCAGACCTGTCGCTGAACAATGTGACGGA CT CAGAAGCCTTCCCGGGTCTTATCCGGCAGACTCACAGAAAAATCAGGGCA  
GCATCGGCAGACGGCGCTTACGACACCCGGCTCTGTCACGATGAACTGCGGCGTAAGAAAATCAGCGCGCTTATCCCGCCCC  
GAAAAGGCGCGGGTACTGGCCCCGTGAATATGCAGACCGTAACCGTGCTGTTGCGAATCAGCGGCTGACCGGGAGTAATG  
CGCGGTGGAATGGACAACAGATTATAACCGTCGCTCGATAGCGGAAACGGCGATGTACCGGGTAAAACAGCTGTTCCGGAG  
GTTCACTGACACTGCGTGACTACGATGGTCAGGTTGCAGAGGCTATGGCCCTGGTACGAGCGCTGAACAAAATGACGAAAG  
CAGGTATGCCTGAAAGCGTGCGTATTGCCTGAAAACACAACCCGCTACGGGGAGACTTACCCGAAATCTGATTTATTCAACAA  
AGCCGCCATGCGCTTCAAATCCTTCCAGCAACAGTTCTTCAAACACAAAAGGATCAATTTTCTCAGGTAGTTAATTTTTGTGG  
GAAGCCCGCAACGTCTTTATGCGCTCCAGCACCCGCGCACTTTGCTGCTTCTTTTGTGTCGTCGGTTGCGTACTGAAC  
GCCGGAAGAATACAACGGCAAACAGTGCGATGGCGCTGCAAGCCATAGAATAAGGTTTTCTGTAGTGGGGAAGGGGAAC  
ATGGTGATAGTGCTTTCTGTGGGTAAAGAAAAGGGCGGTTAAACCGCCCTGGTGTTTAGCGACGGCTGTAAACCTGCCAC  
GAAGCGCTGCCTGACTGATTTTGGCAAATCCGCCGTAAGTACGGTGCCGGTTCGAGTAGCGGGCGCCATTAGATAGCAAT  
AGCCGCTGGATTGCAGCAGTTCTGTTGCGCAGCTTTTCTTCTGCTTTGATAGCCGGGACTCCGCAGACTGCAAACGAACGGA  
TAATTCGTTAATCTGGCGTTGCTGGTTATTCATCTGGCTCTGCATCGCATTACCTTTATCTTGGCTGACGCAACCAAGTTAAGAGA  
GCTGTACAGGCTAATGCACTTAATATAATTTTTTACGTTGGCTCCTTAAATTGAGATTATTCCTAGCCCGCCTATAAGCGAACTT  
TCCCGTATTTACTTATGATCTGGCTTATCATCGACTGGTACTTCCACCTTCGCCATTATCCGGGCATTATTAAGAAAAGCCTTC  
CTGGCATCCCTCGTGTGGTTGGGTAAAAGCCGTGCTTGTCTTTTTAACGATATTGAAGAAAGCAGCTTCAGCACTGTTACA  
CTCGCTTCCGCCGCTATCGCCGGTGAGCTTGGCCGCTATGCACATAATAACTTTGCAGGGATCTTCAGCATGGCTGGCAGGAA  
GATAAAGCAGACTACCAGCTGCTATCAGAGGGATTAAGAGTTTCTTATTGTTTTGTCCTTAACAGTTTTGTTTCAGATATACACC

CGCCAGAATGTTGATAACGGTAAGTAATATTAATAATAACGCAGAGTTATAAATAGATTTGTAACCTATATCGCCTGCGATATATT  
CGACAATAAAAACGAAAATCGTTAACATTGCGAACAACTTAATTAACCTTCTCTGTAATTTTCTTAACGATATAAGCAACTGAATA  
AGAGCCGGATTTGATGATGCTGGCGAGTAACCTGATAGCATGGACTCGGAATTTTCTTAAAATGGGCGGAATGGAAAATGCC  
TTTTTCTCCTTCTGCCTTTTTGCTTTTCCGAAAATCAATAACATCGCCATTTTTATACTCTCCGGTTATATCTTTAGATCATCAA  
GTGATAAACCACTATCAAGCAGCTCTTTGAGCCATGTTGGTCGGCGGCCAGTCCCGGACCAGGTATTTTCTGCGTTCCTGGGG  
TCGCGGTATTTTACTTGTCTATGTTCTCTGGGGTTGGCAACGCCCTGCATTTTCATGGCTTCCAGGCTAATGCCAGCGTCCAATT  
TTGCAGTTAGCCAGGCCGGGCGCTTCCCTATACCAGTCCACGTATTAAGGGTTATCCGGGTCACGATACATGGGTTACCT  
TTGGGGCGTTTTTCTGATTTTCAAGGGAAACCAGCATTACCTTCTTCTCAGAGGTTTTCTTTTCTGTTTCTTCTTGACACGATC  
TCATTAGCCCTTATCATAAACATAAGTCGTCGAAATTACAATTACGCGGTGAAACGTAATGAGTAAACATCCAAAACCTTCTGGT  
TCTCGCTCTGGCCTGCCTTGCTTGTGCTGGCCGTGCCAGTGCTGCGCCTGCCTCAGATGAAGTTGCCAGGCTTGCAGAGAGA  
TGTGCGCCTGATGTTTACCCTTAACAATGGCGTACATCGTCGGCCATGAGTCTCAAATGGGCGGTACAGGATCAATATTAAC  
GGTGGTAGTACCCAGTTAAAACAGCAACCACGTAAGCTGAGGCGGTACAGCGTTTTCGAAAGTTCTGCTGAAGGATAATA  
AAAGTTTTGATATGGGCCTTGCACAAATTAACCTCAAATAATTTAGTGGGCCTGGGTCTTTCGGTTGACGATATTTTCAAGCCCT  
GCATCAACCTGCGGGCGAGCCAGACCATCCTTAAAGCCTGTTATGATAGCGCCCTGAAATCCTATCCAGCCGGGCAGGTTGCG  
CTGAGACACGCGCTTTCCTGCTACAACACCGGCTCACTCATAAACGGGATTTCTAACGGGTATGTCACGAAAGTTATCAACGT  
GGCGGTCAATCAACTGATTTGAAAATCCCTACGCTGCTACCTGATGGCCAGACCAGTGAGGACAGCACCAGCGACTGAGCCT  
CAGCAGGCAAAAAGTACGGCCACGCAGTATGACGGTGAACAAGATGTTTTGGTTTCGGGTGATGGCGATGCCTTCAGCCGA  
AATAATACGGATGCCTTTTTAACCAACAGGAAACAGCGAAGGGGGAGTGAGGTTATGGATGGAACGTTTGTACCTTGATT  
GCAATCACAGATCCTGGAGCTATTTGAAACAGGAAAAGTGAAGGAGGTAACGATAAAAACGGGTTTCATTAAGACGTGGTAT  
CCCGTTTTTTCAGATAGACGATGAACAGTTGGGCCAGATCGCATGTTCCATTTCGGGTTAACAAAGAGCATGAACTACGAACCTG  
GGCTGATTTAAGGCTACTGGCAGAGTTTTTGAAGATAAGTGTGGCGTTGAAGAATGCCGTTAAATCTGCAATCAACAGAA  
GATAGTGAGTAAGGAGAAAGTATGACCACGTTGTTAAGAAGTATGGCCCTGCGGTAGTTATGGGCGTTTTGTCCATTGCCCT  
GCCGCAAATTGCGCTGGCCGCTGGCACCGATACTGGTGAATCAACCGCTACATCAATCCAGACGTGGTTGAGCACATGGATTC  
CAATTGGTTGTGCTATTGCGATCATGGTTAGTTGCTTTATGTGGATGCTTACGTAATCCAGCCAGCTTTATTCTCTCGTATCGTA  
ATCTCGCTGATTGGTATTGTTTCTGCATCATTTCTGGTTTCCCTGACGGGCGTAGGAAGCTGAACAACCGGAAAAGGGGGGA  
CTTTTGTCCCCCAAAGTGAGGACTACAAAGATGTTTCGTTGACGGGAAAAGACCGCTTTTCAAAGGTGCGACTCGCTTACCTC  
GCGCGCTGGGTGTACCACGTAATGTAGCTATGATGATTTTCATGATTTCTGCCTCGTTTTTATGATTATTCATATGTGGGCGATC  
CTGGTGTTCGCTTTTTTGTGGATTCTTTCAGCTGCATTAACAAAATATGACGACCGCATGTTTTCGAATTATGGGCCTGTGGTTG  
AAAACCAAATTCAGTAATTGTTTGTATTCTCCGTTTAAAGCAGTGGGGAGGATCGTCTTATTCTCTGTTGACTACAAACGTAAG  
GGTTTAAAATAATGAGAGCTGCCACCGCTACGAAGCCAAAAAATTGATGCCTACCGTAAGGAGCCATCAGTAAATAAAAAG  
TATTTGCCCTATTCTTATCACCTCAATGATTACGTGATTTTCGATGGAAAACGGCGATCTGATGGCTTTTTTCAAGCTGGATGGCC  
GCACACATGACTGCGCATCAGATCGGGAACCTGGTCACCTGGCATAAAGACCTTAATACGCTGGTCAAGAGCTTCGGAACAGA  
CCATGTAGAGCTGTGGACGCATGAATATCACCATGAGGCTAAAGAGTACCCGGATGGTGAGTATGACCATTTTTTCCCTGCTTA  
TGTTGATCAATATAACCGTAAGCTGCACGGTGATTCCAAGCAGCTGATTAATGACCTTTATCTGACCGTTATTTACAAACAGGTA  
GGGGATAAAAACACAGAAGTTTCTGGCGAAATTTGAAAAGCCGACTCGTGACGAAATTCAGCGAATGCAGAATGAGGCGCTT  
GAAGGTCTGGAAGATATTTCTGAACAAATCCTGGAAGCAATGAAGCCGATGGCATTACAGCAGTTGGGTATCTATTATCGTGA  
CAAACGCGGTGTTGAAATTCCTGCGCCTGATAAAAAAGAACGTGAAGAACTTGCTGAAGTCGATGAATCAGACATTTTTGAC  
GAAGCCATTGTTATCGAACGCAACGAGCCTGAACCTTCGCAGGCTCACGCTTATTCAAAGCGCTGGAGTTCCTTTATTTCT  
CGCAAATATGGAATGGGCCATCGTGCCTGTTTGGCGTGATCGTATCCGTGAGTACATCATGGACAACCGCCCTGTTAGCTCACT  
GTGGGGGATGTTGTCCAGATCAGAACGGTAGATCACAACCTTCTATACCACGGCATTGAATTCGTGAATACGAAGAAGATAC  
AGAGCCAGGCCAGCTTAACATGCTTAAAGAAGCCGATTTTGAATACCTTCTGACGCAGAGTTTTTCTTGCCTCTCTGAATCTTC  
AGCTAAAACGTTTCTGACGCATCAGGAAAATCTTTGCAGGAAAACGCGGACCGTGCGCAAAGCCAGCTGGCACAGCTTGG  
TACCGCGCTCGATATGCTGACGTCCAGAGAGTTCGTGATGGGCTACCATCATGGAACCGTGATGTCTGGGATAATGACCAA  
ACGCGGTACAGCGCAAAGCGCGTCTGTGAAGTTATGCTAACCGGCTGTGGCGTGGTTGGCGGGACTCTCAGCCTGGCCT  
CTGAGGCTGCATATTATGCGAGACTGCCTGGCAACCAGAAATGGGCGCCGCGCCCGTTCCGATAAACTCATGGAACCTTCT  
GCACTTCAGCCCGTTCCACAATTTTATGCGTGGAAGCCTGACAATAACCCGTGGGGGCCAGCGCTGACCATGTTCCGCACG



ATCAGCGGTACGCCACTCTATTTTAATTTCCATGTGACCCCGCTTGAAGAACTTTCCTACGGTAAACGCCCGCTGGGCCATGCG  
TTAATAACGGGTATGTCGGGGGAAGGTAAAACCACGCTGCTTAACTTCTGCTGGCGCAGTCAATGAAGTACAACCCGCGGC  
TTTTTGTATGACCGTGACCGCGGTATGGAGCCGTTCAATCGAAGCGTTGGTGGCTACTATAAAGTTCTGCAACAGGGTATG  
CCGTCCGGGTTTGCCCCGCTCAGATTGAACCGACCAAACGCAATATTGCCCTCATTAAAAACCTGTTCCGCATTTGTGTGGA  
AACCACCAATAACGGGCCTATCAGCGCAACGATGGCTACCGAACTGGCTGAAGGCGTTGATGCGGTTATGGGGGAAGGCTC  
ACTTATTCCACGCGAGGCGCGCACCGTTACTATCCTGGACGGGTACGTGAATGAAGTTGTGGAAAATGGCGTATCACTGAAA  
GGGCTGCTGCGGAATGGACGCGGAAGGCCAGTATGGCTGGCTGTTTGACAATGATAAAGACAGCCTGGATCTCAGCGCG  
AATGATATTTTTGGCTTCGATTTATCCGAGTTTATCGCAGCCAAAGAGGAAGTATCCAGCCCGGCCGTACTCCGCTCATGATG  
TACCTTCTGTACCGGGTACGTGACTCCATCGACGGCAAACGCCGCGTCATTCAAGTGTGTTGACGAGTTCCACGCCTACCTTGA  
CGATCCGGTTATCGAGCGTGAAGTTAAGCGTGGTATCAAACTGACCGTAAGAAAGACGCTATCTATGTGTTTGCCACGCAGG  
AGCCGAACGATGCGCTGTCCAGCCGTTATGGCCGCACGATCATGTGCGACACCGTCACAAAAATCTGCCTGCGCGATCCGGA  
AGCTATCCGAGAGGATTATGCCTTCTTACTGATGCTGAATACGACGCGCTGATGTCGATTACCGAACACTCCAGACAGTTCT  
GGTTAAACAAGGGCAACAGTCTGCGATTGCTTCTTTCAATCTCTACCCTCGCAACAGCGACGATATTGATGCAGATATTAAGAC  
AATGGACAACGTTCTTAGCGTGTGTCGGTGAACCACAAAACGCCGAAATTGCGCATGAGCTGTTGAACGGCTCGGTAAT  
GACCCTGAAGTATGGCTCAAAGAATACTGGCGCCTGACGGCTTAAACAACGAGGCAAAAACCCATGAAAAAAACTGACGG  
CAGTATTGCTGACCACCGCCTGATACTGGGAGGCGCGCAAAGCGTTCCGCGAGGCATCATCGTGACCAACCCTACTGAGCT  
GGCTAAACAGGTGCGAGCAGTTCAGCAAATGGCGCAGCAGCTGGAGCAGCTTAAAAGCCAGCTGCAAACGCAGAAAAATAT  
GTATGAGTCGATGGCAAAGACAACCAACCTGGGCGATCTGCTGGGGACGTCTACCAGCACGCTGGCAAATAATTTGCCGGAC  
AACTGGAAGGAGATCTACAGCGACGCCATGAACTCCAGTTCTTCCGTCACGCCTTCAGTTAACAGCATGATGGGCCAGTTAA  
TGCGGAAGTTGACGACATGACGCCAGCGAAGCAATTACCTACATGAACAAAAGCTGGCTGAAAAAGGCGCTTATGACCG  
TGTTATGGCAGAAAAAGCCTACAACAACCAAGATGCAGGAACTAACCGATATGCAGGAGCTGACGGAGCAGATTAACGAC  
TCCAGACCTGAAATCGATTGCTGACTTACAGGCCCGTATCCAGACGTCACAGGGTGTATTAGGGTGAGCAGGCCGAAGCTG  
AATCTGATGAACATGTTGCAGCAGTCACAGGACAAGCTATTACGTGCGCAGAAAGAACGTGCCACCCACAATTTTGTGTTTGG  
AACCGGCGGGGACGTTACCGCGTCACCTTCAATTAAGTGAAGTAAATGAAAAAACTACTGCTTGTATCCCTTCTCCTAG  
TGGCCTGCGATGCCTCGCATGACGTGGAGTGGTACAAAAACATGAGAAAGAGCGCAAGGCAACAATTCAGGAATGCAAGA  
AAGACGCGGATGAACTTCAGAAACCTGATTGCAAAAACGCGCGCGAAGCCGATCGTCAGCTGTTTGTGTTTCGGCAAAAAAG  
ACGGCGAAATCAATTCACCGAAAATTTAGGAGTAAGGAGGCAATATGGCATTACCCCTAGTCGCAGACATTTTCGCAAAAGTA  
GACGGGGCGATTACGTCAATGGTGAGCGCCAATGTTGCCACCATTATCTCTGATGTAACGCCTCTGATTGCCACCTGTCTGACA  
ATCAAGCTGATGTTTCAGGGGATGTAICTCAGCGTTTAAATCCGGGGGCGGGCGACAGCCTGAGTTGCTGATTAAAGAGTATC  
TTCCATAGCCCTTATCCTGAGCTTTGCAACGGCGGGCGGCTGGTATCAACAGGAACTGGTCAACGTGGCGCTTACCTGCC  
GGATGATTTTGCCTGGATACTGTCTGCCCTAATAAAGTCGGTGAAGTGGCGTACCGGCGATTATTGATAGCGGTATTGAAA  
AAGGTATCAAGATCGTCAACACCGCATGGGAAGCCGAGACGTGTTTTATCGAGCGGCCTGGCCGCGTATGCCATTGGCGG  
CATTATGATGATTGCTACCGTTGTGCTGGGCGGCCTCGGTGCGGGCTTTGTGATCATGGCTAAGATCCTTCTGGCCGTTACGCT  
TTGTTTTGGCCGATTGCAATCTTCTGCTGCTGTGGGGAGCGCAAAAAACATCTTTGCTCGCTGGCTGGCGTCCGTCATTA  
ACTATGGCCTTGTGTCGTCATTCTTGCCTGCTGTTTGGTTTCATCATGCAGATGTTGACAACCTCCTGTCCTCGATGAACTC  
TGATGCCGCTTACTCATCAATCACTGGTTCTATCTCCGCTTATTACTGACGGTCATTTCCGTTTTGCTTCTGTTCCAGATTCCGC  
AAATTGCCGCCAGCTGGGGTAGCGGTATCAGCGCCGGAGTTGCTGACGCCGCACGCTCTACGGTTCTTCCATGCAGGCGCT  
TGGAATATGGGCAGCCACGGCATGTTTGGCGGTAATGCGTTCAGAGGCGGTAACAGTGGCGGGCGCCAGCAATCGGCAG  
GTGGAGGAAGTGGCAGCAACAGCGGAGGAAGCAGTGGTTCTAATTTAAGTGGTAAGGCAAGGGGCGAGTCGCGGGAAGAA  
GGCTGCATAAAATTAACAAAAGTTCGTTGAAATTGCAATTTGACGACTTATTATAATTAGTACGTTCAACAACCGATAATGG  
ATGCCGTAATGCGCAGCTTATTGCTTATGGGAGTTCTTCTGATTAGCGCCTGTTCCAGCGGGCATAAACCGCCACCGGAGCCG  
GACTGGAGCAACACCGTTCCAGTAAACAAAACAAATCCCGGTTGATACGCAAGGTGGTGCAAATGAAAGCTAATAAAAAACA  
GGGCTTACACGTGAAGCCATTAAGAGTTCAACGAAAGCCGTAAGGGCTTGAAGTTGATCTGATGGATGAAGTGCTGAAG  
TCCCGGCGTACCGCCTGGATGGTTGCCACCGGTTACGCGGTGGTAACTGTTTTTGCCTCTCTTTAGTTGGTTACGTGGTGCA  
TAAGTACAGCCAGCCAATCCCCGCACATCTGCTAACGCTCAACGAGGCCACTCACGAAGTACAGCAGGTCAAGCTGACCCGC  
GACCAGACCTTATGGTGACGAAATTGATAAGTTCTGGCTGACACAATATGTCATTACCGTGAGAGCTATGACTTCTATTCA

G TTCAGGTCGACTATACGGCCGTTGGCTTAATGTCCACGCCGAACGTGGCAGAGTCTTACCAGAGCAAGTTCAAGGGCCGCA  
ACGGTCTTGATAAGGTTCTGGGCGACAGTGAACGACCCGCGTGAAGATTA ACTCTGTGATCCTCGATAAACCGCACGGCGT  
AGCAACGATACGCTTTACTACGGTTCGCCGCGTGCGCAGCAATCCC GTTGATGATCAGCCGCAGCGCTGGATTGCCATTATGG  
GGTATGAATATAAATCGCTGGCGATGAATGCTGAGCAGCGTTATGTCAACCCGCTGGGTTTTCCGCGTGACGAGTTATCGCGTC  
AACCTGAAGTTAACTGAGGGCTGCCCATGAAAAACTACTTCTTT CAGCAGTCGTTTTGTGTCAGTCCTGGGAGGCGCGGCC  
ACTAACGTTATGGCGCTTGAGGTTGGCCGCAATTCTCCTTATGACTATCGCATTAAAAGCGTTGTTTATAACCCTGTTAATGTGG  
TCAAATTGACGCTATCGCCGGTGTGGCTACCCACATTGTTGTGCGGCCTGACGAAACCTATATCACTCATGCTTTTTGGCGATT  
CTGAAAGCTGGACGTTTGCGCACAAAATGAACCATTTTTTGTGAAGCCGAAACAGGCCATGAGTGATACCAACCTGGTGATC  
GTCACCGATAAGCGCACCTATAACATCGTCCTCCATTTTCATCGGTGAAGAAACGAAGAAAAATGCAGACGGTACGGTATCAA  
ATCCTTTATTGAAACGCCGTGGGCTGTGCGCCAGGCCGTTCTTCAGCTGACCTATGAATATCCGTTTGAGCAGCAGGAAAAAG  
CCAAAAGCGCGGCTGATAAAAAACGCATTACGCAGAAGCTGAAGCAGACGGCTTTTGCGGGGGCGAAGAACTATCAGTACG  
TAATGAGCGAACAGCCTGAAATGCGCAGCATCCAGCCGTTTACGTCTGGGATAACTACCGCTTTACCCGGTTTGAGTTTCCG  
GCCAATGCGGAGTTACCGCAGGTCTACATGATTTTCGGCCAGTGGCAAAGAAACGCTGCCTAACTCTCATGTTGTGGGTGAGA  
ACCGCAACATCATCGAGGTGAAACCGTGCCTAAAGAGTGGCGTATTCGTCTGGGCGATAAAGTCGTTGGCGTTCGTAATAAT  
AATTTGCGCCGGGGCGCCGGTGCGGTAGCAACCGGTACGGCTTCCCCGATGTGCGCAGGGTTCAAATTGGGGAGGATAAC  
TGATGGCCCGTAAAAGTGTGATGTAGATCAGGAACTCGATGAAAACCCGGAGACGGTGAATTCGAAAGCGAGCGTGGCG  
GATTTAAAGGCAGTAACCGCCGTTTCGGCTCCTGGTATGAAAGCCTTTGTCATACTGATGGCGCTGCTTGCTTTGGTATTCATCG  
GGATTACGGTCATGGGTAATAATTCGCACCCCGCTAAAGCTGAAGCTGATAAAGACGGTGGTAAAGCGCAACAGGCCAATAC  
ACTGCCAAACTACAGCTTTAACAGCGATCCTGATGTTAATAAACCTGCAACTGCGCAGAATAGCGCCACTGATGCCCGTGCTG  
TGCAGGCTGCCGCACAGGCAGATGCAGATGCGGGCAGCAGCAATACCGCCGCGGTACCTCTAATAAGCGTAAAGAACCTTC  
GCCTGAAGAACTGGCTATGCAGCGTCGTCTGGGCGGCGAGCTGGCCAGACTAATCAGGCGGCTACAAGCAATAGTCCCGG  
AGTGCAGCCCCAGGACAACGAAACAAGCGAAGGTAGTTCAGCACTCGCTAAAAACCTGACTCCTGCAAGGCTGAAGGCTAG  
CCGCGCTGGAGTCATGGCTAATCCAGCCTGACTGTTCCGAAAGGCAAATGATCCCCTGTGGTACCGGCACCGAGCTGGAT  
ACCACTGTTCCGGGTCAGTTTTCTGCCGGTTTTACAGGACGTTTACTCAGCTGATGGACTCGTTAGGCTGATTGATAAAG  
CTCATGGGTTGACGGCAGATTACCGGTGGTATCAAAGACGGCCAGGCGCGCGTGTGTTCTCTGGGAGCGTATCCGCAAT  
GACCAGGACGGGACAATCGTTAATATTGACAGTGCCGGAACGAACTCACTCGGCAGCGCGGGGATTCCGGGCCAGGTGGAT  
ACCCATATGTGGGAGCGTCTGCGTGGTGCGATCATGATTTTCGTTGTTCTCTGACACCTAACGGCGCTGGTTAACAGACGCA  
GAGTAATAACATTACGTACAACAGCACAGAAAACAGCGGTGAGCAGCTGGCGTCTGAAGCACTCCGCTCTTACATGTCTATCC  
CCCTACCCTCTACGATCAGCAGGGTGATGCGGTGAGCATTGTTGTTGCCCGCGACCTCGATTTACGCGGCGTTTATACGCTCG  
CAGACAACTAAAAAGTGGGCGCTTAGCGCCCGCTTTTCTTCAGGAGTAATCATGACTGATGCAGCTTTCTATCAACTTGGCC  
CACTGCGCAGTATTTAGAAGATCCTACTGTTTTTGAATTCGCATTA ACTGCTTTCAGGAAGTTATCTGTGATACGTTACGCG  
GCCGAGGGTTGTGCAGAACGCGGCAATTACGGCAGATTTTATTAGGAACCTTGCTAAATCGTTGGTGAGCAGCAACAAGCT  
GACCATGCAGGCCATTAATGACGTGATCCTGCCTGGCGGGATCAGGGGCGTTATCTGTCTGCCCCCTGCGGTGATTGACGGTA  
CAACGGCCGTAGCGTTTTGTAAGGATTTGGCGGCCGATAAAAACTGGAGCAGCTGACCCGCGAGGGGATTTTACGTGACT  
GCCGGAAGATTACCGGCAGCAAGCAAAGCCTAACGGATGATGATTTTTCTTAAAGAGCTGCACAGCAGCGAAAAATGGC  
CCGCAATTCCTGCAAACCGCGTTGAGAAGAAACGCACTATCGTGATCTGCGGTGAAACCGGGTCGGGGAAAAACGGTACTCA  
CGCGCGCGCTGTTAAAATCGCTACATAAAGACGAGCGTGAATTATTTTAGAGGACGTTACGAAGTCACGGTCGATCACGTT  
GTAGAAGCCGTTTATATGATGTACGGCGATGCAGGAAAGATCGGCCGCGTCAGCGCCACTGATGCCCTGCGAGCCTGTATGC  
GTCTGACACCGGGCCGTATCATCATGACTGAGCTTAGGGATGATGCTGCGTGGGATTATCTTAAAGCACTTAATACCGGCCATC  
CAGGCGGTGTTATGTCAACGCACGCTAACTCTGCGCGCGATGCCTTTAACCGTATTGGGCTGCTTATCAAGGCGACCCCTATC  
GGCCGTATGCTCGATATGAGCGATATTATGCGAATGCTCTACTCCACCATTGACGTTGTGGTGCATATGGAAAAGCGGAAAATC  
AAAGAAATTTATTTGACCCTGAATATAAAATGCAGTGTGTGAACGGGAGCCTGTAATGAAAACTTAGCAACCTGGCTTCTG  
GCCGACGATTTACGACAGCCGCCCTGCCCGCTTTGCGGTGGAACCATCCGTTTACGTTGGCTACTGCGCTGAAGGGGGT  
AAGCGGGAACCCAGAAAATTCGCCATTCCGCATTGTGGAATTTTTGGGGTGGTCCGCGGCATGACGACCCGCCAAAGG  
CTACCGCATCTATCTGAGGCGCTGTGGCGCGACGCTGAAACCCCGGGGAATTCGCTACTCCAGTTCCAGGTCCGCAATAGTT  
CGTCCAGGTCGGGTGGCGTACGCCGGAACGCCGATTTTTCCGCAACCGTTTCTGCGTTGTGCGCAAGGTGGTCTCAGAGA

GCGCTCAAGAAGCGGTTTTTCTCGTATGTTTAGCTACGGTGGCCTAGGAGCCTGCGCGGCAGAAGCCAAATCGGCGGAAGA  
TCGAGGACGATACGGGGATGGCTGCCAGTTACCTTCCTTACCGACCCGACCAATCCTATCTGCTGCCCCCTTCTCTGGGAGAG  
TGGCTACCTGAAGGGCATCTTGCCTACTTCATCAGCGAGACTGTGATACTGACTTGAGCGCATTCCACGCCCCGGTATGC  
CGGCGGTGGTCCGGGCAATCAGCCGTTTCATCCGGCGATGATGGTCAAAGTGCTGATCTATGGTTACGCGAGCGGGCTCTTC  
TCTTCGCGCAAAGTAGCCAGGAAGCTGTACGAGGATGTGCGTGTGCTGGCCGCTGGAAACTTCCCGGCCACCCG  
ACGCTGAGTGACTTCCGTGCCCTACACCTGACCGAGCTTGAGAATTTGTTTCGTTACGGTGGTCAACTGGCGCGCAATGTG  
GGCTGGTGAAGCTTGGCACGATCGCGGTGACGGCACCAAGGTAAAAGCCAACGCCAGCCGCCACAAGGCGATGAGCTAT  
AAGCGCATGAAGCCGGCCGAGGACGAATTGCATTGCGAGATCAAGGCGCTGCTTGATCGCGCCAAGGCTACCGACGACCAG  
GAGCGTAACGAGCCGGAGCTGGACATTCTGCCGAGATTTCTGCCGCGAGAAGCGCCTGGAGGGGATCCAGGGCGGAAA  
GGCGCGCCTGGAAGGGGTTCGGTTCGGCTGAGGGCGAAATGACACCCTAAGCTTTCGGTTCCTTGGGCCAAAGATATTCG  
CAGTCAGTAGAATGTGCGCCAGCCCAATGGGGATATGTGGGGAAGAAATTCAGGGGGAACATCCAACCCTTCGTTCCGCGC  
CTCCGTGACGGCATGACCAAGATGGACGGTATTCCAGTAAATGATCACCGCAGTCAATAAATTGAGCCAGCGATTTCGGTAGT  
GCTGCCCCCTGTGCTGCGATCGCGAATTTCCCCCTGCCTCCCGATACGGAGCGCATTTTTGAGCGCATGGTGGGCCTCTCC  
TTGTTAAGACCGATCTGAGCACGCCGCTGCATGTCCGTATCCAGGATCCACTCAATAATGAAAAGGGTCCGTTCAATACGACC  
AACTTCACGAAGCGCAACTGCAAGGTTGTTTTGTCGTGGGTAAGAAGCGAGCTTGCAGGAGTTGGCTGGGCCTGATTTT  
GCCAGCGTTCATCGTTCGCGGCACAACGAAAATATCAGGCCAGTTCGCAACGATAAGATCCTCCGGGCTTTTCCACCTACC  
AACTTGCGTAACCTCCCTGGGGGTTCGTATCGGGATTAATACTGACAAACCGCTTCGATGGCAGATCCCTGATTCGAGAACGAG  
ATTGTAGCCGAGCAGGCTACTGGCTCCGAACAAATGGTCGGTGAATCCTGCTGTATCGGCATACTGTTTCGCGAACATGGCGAC  
CGACCTCGTTTCATCAGTAGTCCATCGAGAATATACGGTGCCTCGCTCACGGTCGCGGGGATCGACTGACAAGCGAATGGCGC  
GAACTGGTCGCTTACGTGAGTATACGCTTTGAGGCCGGGAACAGAACCATATTTGGCATTGACCATGTTTCATGGCTTCGCCAT  
GCCGCGCTGTGCGGAAAAACTGACCATCGCTCGATGCTGACGTGCCATCCCCAGACGCGTGACATCGGCAGTTTACCCTG  
CGCGGCCACCACAATTGCCAATGCCTGGTTCATGGCTTCGTTCAACATGCCAGCGGGCAAGGCGTGAGAGCTGCCAGTAA  
TCATGCGTGTGTTGTTAGCTTCCGCCATCTTACGCAGGCCAGATTGAGCCCTTCAGCGAGCAGGACGTTGAGCAGACCGATCC  
GGTCGCGACATGGAGCCCCGGTTCAGATGGGTAACGCATCTGTGAAACCAAGGGTGCATCAACTTCAAGCAGCATGTC  
GGTAATCCGAACGGACGGCATTTCGGCGATACAGATCCAGTATGAGTGCCTCGGCACCATCCGGCACGTCTGCTGTCAACCTGT  
CGATCCGCAACGTTCCATCTTCTATGCTACCGTGCAGGAATAGTCCGTTACGGGCAGCCCCGGGCCAGCCGCTTAAGAGCGATC  
GTGAGTCGCGCCTTTCTGTCTGCCAGCCAATCCTGTGGGTTGGAAGGCACGGCCAGTTTTGCATTTTCTGCGCCGCGATCAT  
CGGCACCACTGCTTGGAGTACCATAGCGGCGCAATGAGCGAGCCAGACATCTCCGGAACGAAAAGCATCCCCGAG  
GTGAAAGAGTACCGCCACTTCCAAAGACGGGTATCTCCTTTTTCTGAGCTCGTAAATGACGGTTCATTTGAGCTGGGCC  
GCAGGAAACGCCTTTCTGGCGATGCAACACCTTTCATCTCTCCGATCGACAAAGCTGCTGCTACCAATGGTCCGGCGACCGG  
CGCGGCTTCGAGCTTCAGACAGCGCAACATGCGGGGCGCATAACGACGAAAGCGATGGTATCCCTGCCCGACATATGCAAG  
AGGCTCATCGGCTAGCGTGTGCTGAGTTGAGTCCCTGTCGCTACCAGTTGAGCGAGCCGGTCCCATGCAACCGAACTGGCG  
ACAGCCATCTCCAGCGGGGTTCCGTCACTGCGGGCCTCAAGCAACGAAGCTCCAGCGCGGTGAAGGTACGGATCGTATCC  
GTGAGTGTGGCTTTAGAGCCGGAATTGTTTCGTCATGCTGGCGCTTCGTTCCCGCCAGGTTTTTCTACGATCCTGTCTATG  
GGTTTCGACTATGGCATCAGCAATCGCCGCTTCCACTCCACAACACAGACGGCAAGGATCGCCAGCGGCGGTCCGAAGTG  
ATGTCACGCAAACCGTCGGTGAAGTAGCGTTCACCCTGCCGACGACCGGGCAATGCGATGGGCGAGGTATGCTGGCCAAA  
GCACTATGATTGATATTCAGGGTACGCAGAAATTCGAGCCTGTCGAGCAAACGGTTAGCAGCAGCCGAGTTGTTACCAACCTC  
GAAGTTGCGAAGCCAGATGAAACGACTGATATTGCCGGCGAGCATTTCAGTCAAGATTTGTTCCAGGTGATCGCGAACATCC  
GCTGTTAAATTTCCACAATCCGCGTTTCAATCCGCCGCTCAGCGGCGACCAGAGCATCCGCGCACAAGCGCTCGATTGTCGA  
TACTGCGGGCAGAATGGTGGAAAGTTTCCCGACACCGCACAATAAACGATGAGCAAGATCCTCGTTTGTATCTGGCATCTTCG  
GCCTGGCCGAAAGTCCACTCCCGCAGATCACGGGACCCACGGCCCGTGAAGGTCTTGTAGCCGTAAATTTGCGCGAGCGTGT  
CCATGTGCTGCTGACGGTTTTGGCGCCGTGTGGCATAAGTGAGAAGCGCATCAGCCGGAAGTCCAAGCTGAGCACCGACGA  
AGGAAAGGACTTCACGCGGGATCATCTACCAGGAGCCAGTGCACGGCCCGGATATCGTAAGGCACAAAGTTGCAGGGCAA  
AGCCAATCCTGTTTTCCGGTCTGCGGCGCTGCCTAATGTTTTCCAGTTCATCATCGCCAGCGTGTAGAAGTTTCAAGTACGAG  
AGTTTCGTCGGTGGGCGAGATCGAACAGCGCTGCTCGCTGCCGTTTCGGTGAATAATGCGGTCGTGACATACAAATTCGTCCTT  
TTGAAGTATAGTCTGTTTTGGACAACAGCCAGCCATATAAATCAGGGCGTTCGATACAAAATCCAGGAGGGTTCAATTGG

GACATCGTGCCGCCATTTACTGCCGGGTTTCAACAGCGGATCAGTCTTGTGAACGCCAGGAATTTGATCTGCGAGCCTTCGCC  
GGCCGTGCCGGCTACGACGTGGTGGGAATATTTAAGGAAACAGGTTTCAGGAACTAAACTCGACCGGGCCGAGCGAAAGAA  
AGTCCTGGCGCTTGCCCAGTCCAGACAAATTGATGCAATCCTGGTCACTGAGCTTTCCCGGTGGGGGCGCTCGACGCTCGAT  
CTGCTCAATACGCTACGTGAACTGGAGAAGTGGAAAGTTTTCCGTGATAGCCATGAATGGAATGGCGTTTCGATCTTTTCGTCGCC  
GTATGGACGAATGCTGGCGACGTTTTCTTTCCGGCATTGCGGAGTTTGAGCGGGATCTCATCAGCGAGCGGGTCAAGTCAGG  
CCTTGCTGTTGCGAAGGCACGTGGTAAGAGGCTTGGTCGTCAGGCCGGAGTGCGACCAAATCAGACCGACTTTTGCCTAA  
GGTGGTTGCGATGAGGGCCGAGGGACGCAGCTATCGCTGGATCGCACGCGAGCTCGGTATCAGCAAGAATACCGTCGCTGA  
CATCGTGCAACGACACAGAGCTAACGCTTAGGGTGTCATTTCCGCCCTCAGCCGGAACCGACCCCTGGAAGCGCGCCAGCGT  
GAAGCGGACCAGGCCCGGGGGCGCAGCGAAGACGATGGCCGCCGGCTCGCCATCCGGATGGCTCGGACAAGGGCGGTG  
GCTCGTACAAACGCGAGTTTGGTGTGCCGGATGACCGTGATCAGGAAAGCTTCACCGATCCGGACAGCCGGATCATGAACAC  
GCCGGTGGTGGCTCCGAGCAGAGCTACAACGGGTACACAGCGGTCGATGCCGAGCACCAGATCATCGTGGCGGGCGGAGTT  
GACCAACTGCGCCGCGACAGTCAGGCGCTGCTGGGCATGCTGGCAGCAGTTCAGGCCAACACCGGAGAAATGCCGGCCC  
AGACGCTGGCGGATGCGGGATTCCGTAGTGAGGCTGTTCTGGCAAAGGTGCGCGATCACCACGGCGATGTCATCGTTGCCCT  
CGGCCGCGAGGGACGTGAAGATGCCAAGGTCAATGCCAAGACCCATCCGCATACGGCGGCGATTGCGGCGAAATTGAAAAC  
GGAGCAAGGCGATGCAGCTTACCGCCGGCGCAAGTCGATCGTGGAGGCTCCGAATGGTTGGATCAAGGCGGTGATGGGAT  
TGCCTCAGTTCAGCATGAGGGGCTGGACAAGGTGCAAGCCGAGTGGAAGCTCGTCTGCATGGCGCTAAATCTGAGGCGAA  
TGCGGTATCTGTGAGGGCGAAGGTTAAATGGGGCGGCTCAAATGCACCCAGTCGTCATAACACGCCGCGCGCCGCAAGATT  
GGTATCCTTGGCGCCGACGCCTTGCCAATTGCAGAGAGCGCCGCCCATCGTCAGTGTCTACAGAAAACCGGTACACCGG  
CTCTGCCGCGCAGACTCCTAGCCTAAATGTGACAGTGGTTGGTAATCCATGCCGCCCGCAAGGGGCGGCGGTGGGCCAATAGA  
TGATTTTCAGAGCCTTACTGCCCGTTGACGCCAATCCCTCGAGCGCGAGTCTAGCCGAGCGGCGATGACGGCCTCGCTGT  
GCTTGTATCCTTGTAGGCGCCCGGGTGTAGACGGCCAACACAATAGGTGCGCGCCAGTGGGCCAGACGACGGCATAGT  
CATTTGCCGTGCCATACACTCCGCAGGTTCCGGTTTTGTCTCCGACTGCCAGTCTGCCGGCACCGCCGCGCGGATGCGGTG  
GTTGCCGTCGTGTTTCCCTTTAGCCAATCAACAAACTGCTGCCGCTGCGGCGCAGCCAGTGCAGAGCCAGTGTGAGTTTT  
TGTAAGCTTTCCGTCACGGCGCGCGGCGATGAGGTATCGCGCGCATCGCCTGGGATGGCGGAGTTCAGCTCCAGCTCCAGC  
GGTCCAGACGGAACGTGGTATCGCCGATAGAGCGCATGAAGGCCGTCAGCCCGGCCGGGCCGCCCCAACTCCTTCAGCAACA  
AATTGGCGGCGGCGTTATCACTGTATTGCACGGCGGCGCGGACAGCTCCGCCACCGTCATGCCTGTTGTGATATTTTTCC  
GAGATGGGTGACCACGGAACCAGCGCATTTTTGCCGTAACGATGGGTGTGTCCAGCAAGCCGGCCTGCTGCTGGCTGCGA  
GCCAGCACAGCGGCAGCAAGAAAGCCCTTGAATGAGCTGCACAGTGGGAAGCGCTCCTCAGCGCGGTAACCTTACAGTTGC  
GCCTGAGCCGGTATCCATCGCGTACACACCGATGGAGCCGCCAAAGTCTGTTGAGTTTAGCGAATGGTTCCGCGACGAGG  
TTGGTCAGCGCGGTGGCAGAAAAGCCAGCCAGCGGCCATGAGAGACAAGACAGCAGAACTAGACGGCGATACAGTGACAT  
CAACGATATTCCTTGTGTTGAAGGTGGAGTTACGGACGGCCTCAGGAAGTCTGGCCAAGCCCGACTATTGGGGCGCGAAG  
ATAGACCGAGGGTACGCCGGTGTCAACACGGGGTCTGACGCTCAGTGGAAACGAAAACCTCAGTTAAGGGATTTTGGTCAT  
GAGATTATCAAAAAGGATCTTCACCTAGATCCTTTTAAATTAATAAATGAAGTTTTAAATCAATCTAAAGTATATATGAGTAACTT  
GGTCTGACAGTTACCAATGCTTAATCAGTGAGGCACCTATCTCAGCGATCTGTCTATTTGTTTCATCCATAGTTGCCTGACTCCC  
CGTCGTGTAGATAACTACGATACGGGAGGGCTTACCATCTGGCCCCAGTGCTGCAATGATACCGCGAGACCCACGCTCACC GG  
CTCCAGATTTATCAGCAATAAACCAGCCAGCCGGAAGGGCCGAGCGCAGAAGTGGTCTGCAACTTTATCCGCCTCCATCCA  
GTCTATTAATTGTTGCCGGAAGCTAGAGTAAGTAGTTCGCCAGTTAATAGTTTGCGCAACGTTGTTGCCATTGCTGCAGGCAT  
CGTGGTGTACGCTCGTCGTTTGGTATGGCTTCATTAGCTCCGGTTCCCAACGATCAAGGCGAGTTACATGATCCCCATGTT  
GTGCAAAAAAGCGGTTAGCTCCTTCGGTCTCCGATCGTTGTGAGAAGTAAGTTGGCAGCAGTGTATCACTCATGGTTATGG  
CAGCACTGCATAATTCTTACTGTGTCATGCCATCCGTAAGATGCTTTTTCTGTGACTGGTGAGTACTCAACCAAGTCATTCTGAGA  
ATAGTGTATGCGGCGACCGAGTTGCTCTTGCCCGCGTCAACACGGGATAATACCGCACCACATAGCAGAACTTTAAAAGTGC  
TCATCATTGGAACGTTCTTCGGGGCGAAAACCTCTCAAGGATCTTACCGCTGTTGAGATCCAGTTCGATGTAACCCACTCGT  
GCACCCAACTGATCTTACGATCTTTTACTTTACCAGCGTTTCTGGGTGAGCAAAAACAGGAAGGCAAAATGCCGCAAAAA  
AGGGAATAAGGGCGACACGAAAATGTTGAATACTCATACTCTTCTTTTTCAATATTATTGAAGCATTACCAGGGTTATTGTCT  
CATGAGCGGATACATATTTGAATGTATTTAGAAAATAAACAATAGGGGTTCCGCGCACATTTCCCGAAAAGTGCCACCTG  
ACGTCTAAGAAACCATTATTATCATGACATTAACCTATAAAAATAGGCGTATCACGAGGCCCTTTCGTCTCAAGAATTTTATAA

ACCGTGGAGCGGGCAATACTGAGCTGATGAGCAATTTCCGTTGCACCAGTGCCCTTCTGATGAAGCGTCAGCACGACGTTCC  
TGTCCACGGTACGCCTGCGGCCAAATTTGATTCCTTTCAGCTTTGCTTCCTGTGCGCCCTCATTCGTGCGTTCTAGGATCCTCC  
GGCGTTCAGCCTGTGCCACAGCCGACAGGATGGTGACCACCATTTGCCCCATATACCGTCGGTACGGCACTGTTGCAAAGT  
TAGCGATGAGGCAGCCTTTTGTCTTATTCAAAGGCCTTACATTTCAAAAACCTCTGCTTACCAGGCGCATTTCGCCCAGGGGAT  
CACCATAATAAAATGCTGAGGCCTGGCCTTTGCGTAGTGACGCATCACCTCAATACCTTTGATGGTGGCGTAAGCCGTCTTCA  
TGGATTTAAATCCCAGCGTGGCGCCGATTATCCGTTTCAGTTTGCCATGATCGCATTCAATCACGTTGTTCCGGTACTTAATCTG  
TCGGTGTTC AACGTCAGACGGGCACCGCCTTCGCGTTTGAGCAGAGCAAGCGCGGACCATAGGCGGGCGCTTTATCCGT  
GTTGATGAATCGCGGGATCTGCCACTTCTTCACGTTGTTGAGGATTTTACCCAGAAACCGGTATGCAGCTTTGCTGTTACGAC  
GGGAGGAGAGATAAAAATCGACAGTGCGGCCCCGGCTGTGACGGCCCGGTACAGATACGCCAGCGGCCATTGACCTTCA  
CGTAGGTTTCATCCATGTGCCACGGGCAAAGATCGGAAGGGTTACGCCAGTACCAGCGCAGCCGTTTTTTCATTTACAGGCGC  
ATAACGCTGAACCCAGCGGTAATCGTGGAGTGATCGACATTCACTCCGCGTTCAGCCAGCATCTCCTGCAGCTCACGGTAAC  
TGATGCCGATTTTGCAGTACCAGCGTACGGCCACAGAATGATGTCACGCTGAAAATGCCGGCCTTTGAATGGGTTTCATGTGC  
AGCTCCATCAGCAAAGGGGATGATAAGTTTATCACACCGACTATTTGCAACAGTGCCTTATTTGAGCATTTTCTTGCGAAA  
AAGCCGACCGGGAAAATTGACATGCGTACCATTGCGCTGGGGTGAATAAGGCGATAGACACCGGTACCTACACATTTACCTT  
CGCGGACAAATCAACGTTTTAGCCCCGCTACACATTCACTTATGCATGGGACGGTAAAGAGTGGAAAATTTCCACACACCACT  
CTTCAGCGATGCCTGAAGGGTAAAAAGCTGTGCAGGGGGCGGAATATTACCGCTCCCTGAAGACTAGCCAATAATCGCGAT  
GCCAAGACGTTCCATGAGCAACGATGCCTGGTAGTTGTCCAACCTAACGCCTTGTAATCAACGCGCCGAATATCTAAGTCAC  
CCAACCTCCGAATTGGTCAGATCGCAATGTGTGAAGTTTGTGCTCGCCAGTCGAAAGTCGAAAACCTCGCCGCCGAGAGATC  
TGAACCACTGAACGTCGCGCCAGTACCTGGGCCCCCATCCAACGTTTTTCCACAGCTCACACTTTTTCAACACGACTTTTCG  
AAAAATTGGCGTAGCTTAGATTTGTGTTAGTGATATATGCACTGCAAAACCAGGTGCGAGTAGTGATCATATTCATAAACTTG  
CGCCGCGAAAATCTGCGCCTTGCACGACAGTGGCGAATTTCAATGCCAAGCGCACTGGCATTGCGAAAATCCGCCATGGA  
TAAATCACAGCTTTTAAAAATGGCATCTTTCAGCATCGCACGACTAAAATTGCACCCTTCTGGCTTTCAGCATAGAACTG  
ACAGCCGATAAATCAGTGCCGCTCAGGTCGGCACCTGAAAAATCACAGTTAAAAATGTACTATTTTCAATTTTCTCACCGGT  
GAAGCGTTTTCTGTTAATTTTTTTCGCCAACGAGTGCCAGAGCCATATTTTGTGCTGTTTTTTTTTATACAGTAATGGCGTCATGG  
TAAACCCTGATGAGGTTATGCGTCAAATCCGCCAATATAACATCTGCAAATGTGCGTTAAATCTGGTGTTTTTTTCAGCAAAGCG  
CGAAGCTGATGGTAAGTCAGACCCAGTAATTCAGCGGCTTTTTCTGGTTAAATTTTGCCTGCTGTAAGCTGGTTTGTAGAAAG  
TCTTTCTTCTGCTGCTGCTGGAATTCACGCAGATCCAGCGGTAACCCTACAGACATCGGTTTAGTTTTCCGGCGCCTGCGGCTG  
CGTCTGGTTCTGAAATCCATCCCTGTGCGGTGTTGCTTATGCAGTCTGGTCGGGACTCGGCGTCTCATAATTACAGCCATTGCC  
TGTTTGTTCATGGGCAAAGCTTGATGCGTGGGGCTTTGTAGGTATGGGGCTCATAATTGCTGCCTTTTTGCTCGCCCGATC  
CCCATCGTGGAAGTCGCTGCGGAGGCCGACGCCATGGTGACGGTTCGGCATTCTGAATCTCACCGAGGACTCCTTCTTCG  
ATGAGAGCCGGCGGCTAGACCCCGCCGGCGCTGTACCAGCGGCGATCGAAATGCTGCGAGTCGGATCAGACGTCGTGGATG  
TCGGACCGGCCGAGCCATCCGACGCGAGGCCTGTATCGCCGGCCGATGAGATCAGACGATTGCGCCGCTTTAGACGC  
CCTGTCCGATCAGATGCACCGTGTTCATCGACAGCTTCCAACCGGAAACCCAGCGCTATGCGCTCAAGCGCGGCGTGGGC  
TACCTGAACGATATCCAAGGATTTCTGACCCTGCGCTCTATCCCGATATTGCTGAGGCGGACTGCAGGCTGGTGGTTATGCAC  
TCAGCGCAGCGGGATGGCATCGCCACCCGACCCGGTCACTTCGACCCGAAGACGCGCTCGACGAGATTGTGCGGTTCTTC  
GAGGCGCGGGTTTTCCGCTTGCAGCGGAGCGGGGTCGCTGCCGACCGGCTCATCTCGATCCGGGGATGGGATTTTTCTTG  
AGCCCCGACCCGAAACATCGCTGCACGTGCTGTGCAACCTTCAAAGCTGAAGTCGGCGTTGGGGCTTCCGCTATTGGTCT  
CGGTGTCGCGGAAATCCTTCTGGGCGCCACCGTTGGCCTTCTGTAAAGGATCTGGGTCCAGCGAGCCTTGCGGCGGAACT  
TCACGCGATCGGCAATGGCGCTGACTACGTCCGACCCACGCGCCTGGAGATCTGCGAAGCGCAATCACCTTCTCGGAAACC  
CTCGCGAAATTTGCGAGTCGCGACGCCAGAGACCGAGGGTTAGATCATGCCTAGCATTACCTTCCGGCCGCCGCTAAATAT  
CTCCTTTTGGGTTGTTAATAAAACATCCAATAAGTTGACTGTGCGTGAAAAAGAAAGTTTTGTGTGATGGCGTTGAAGATCGC  
ACCGTTAAGCTCTTATGTGGGATGGTGCAGAGCTCGACGACTACCGATAAAACGCAACCGCCGAAACAGACAAGAAAAAG  
CCCCAACTGATAACAGTTGGGGCTTCAATATTGTGATTGGTGGAGCAATAGCACCTGAACCCAAAACCTTCTCGCTCAACCG  
GTAGTGGCTGATAACAACTCGTGAGGGCTATTGCGGGTTAAGCATTAGCGATGTCTAGGGCCAGACTGGACGTCTGAACGC  
AAGCCGCTGATACTGTACATAACCACAGTATCAGCGGAGGATACCCATGTCGCTGGCAAGGAACGCCACGGCGAGTCAATCG  
CCCACTCAAACAAACGTTACGAACGCCACCAACCCGACAGACGCTGCTTACCAGCTGGTTGAGCAGCACTACCCAGCCT

TCAAAGCCTCACTCGAAGCCCAAGGTCAACACCTGCCTCGCTACATCCAACAAGAATTCAACGACCTCCTCCAATGTGGCCGT  
CTGGAGTATGGTTTCATGCGGGTTCGCTGCGAGGATTGTCATCACGAGCGTCTGGTCGCCTTCAGCTGTAAACGACGCGGCT  
TTTGGCCCTAGCTGCGGTGCCCGCCGATGGCCGAGAGTGCGGCGCTGCTGATAGACGAAGTCTTCCCAAGGAGCCATT  
GCCAGTGGGTGCTCAGCTTTCCTTTCCAGCTACGCTTTTTGCTGGCTCGCCATCCCCAGCTGATGGGCCAGGTCTTGAGTATC  
GTCTATCGTACACTCTCAACTCATCTGATCAAAAAAGCCGGTTACACCAAAGCCTCTGCACAACTGGCTCAGTACTCTTATC  
CAACGCTTTGGCTCCGCGCTAAATCTCAATGTCCACTACCACATGCTGTTTCTCGATGGTGTCTATGCCGAAGATGACTATGGC  
AAGCAACGCTTCCATCGTGTCAAGGCACCCACTTACGATGAGCTGAATACGCTCGCTCACACCCTCAGCCATCGCATCGCTCG  
CTGCATGGAAAAGCGTGGGATTTTGGAGCGTGATGCCGAGAATACGTGGTTGACACTGGAAGAGGGCGAAGACGATACGCT  
GACTCAATTACATGGTGCTTCGGTTACGTATCGCATTGCCGTGGGCCCCAGCAAGGGCGCAAAGTCTTACCCTGCAAACCT  
TGCCAGGGCGTGAGGATAAAGCCGACTCAAGCAGTCGAGTAGCCAACCATGCTGGTTTCTCGCTACACGCCGGTGTGATGGC  
CGAAGCGCATCAGCGGGATAAGCTTGAGCGCTTGTGTGCTACATTAGTCGGCCAGCGGTTTCAGAAAAACGTCTGGCATT  
ACCGCAATGGGCAGGTGCGTTACGAGCTCAAACTCCGTACCGCAATGGCACCACCCATGTGATCTTCGAGCCGCTGGACT  
TCATCGCCAACTCGCTGCGTTGGTACCTAAGCCGCGAGTCAACCTCACACGCTTCCACGGCGTCTTTGCACCGAACAGCAA  
ACACCGAGTTCAAGTAACACCCGCCAAGCGGGGCAAGAAGCCCGACAAATCGGAAGGTCTCGATACTAACTGGCGTGACAA  
GAGTCTGCAGAGCGCCACCGCGCCATGACCTGGATGCAACGCCTCAAGCGAGTCTTCAATATTGATATTGAAGTCTGCGAAC  
ACTGCGGCGGTACGTCAAAGTGATTGCCAGCATCGAAGATCCGAAGGTCATTGAGCAGATTCTCAAGCATCTGAAACAGAA  
AACAGCCAAGGCGAATGCCGCCAAGCAGCGTGAGCTGCCACCAGAACGAGCGCCGCACTGACTCCCAGCCTGTTGATCC  
ATCACAGAGTCGTCTCTTTGACTGACGACCCCAAATCCAACACTGCTCAACACTGCCAACTTTAAACGGGGCGGTGGGGCA  
GTTTGTATCTCTCGAGCTATCAGGCTAGAGATTTACCGCCAAATCGAACCTTATTAGAGCGGTTTAGGCTGGACCGGCAGTTA  
AAATTGGGGCTTGAGCGGTAAACGAGTGAGGGAATTTACGGTAAGATACTTCGGATGAGGAGCAAAAAGGTGGTTTATACT  
TCCTATACCCAGTAGTGTTCCCCTGTGCGTTTGGTTGGGGTCGATGCCCACTTTGGGCGCGGCGTTGGGCGCCGCAAGATG  
AAAGCTCTGTGTGAAGGCTTGGATATTAAGACCTTGGATGATTTCAATGCCATCACCGAAGAGCAGATCGTTAGCGTCGACAA  
ATTCAGCTACAAAAGTCCGCAAAAGTGCTTGCAGGTATGGCTGAACATGCCGAGCTATTCAACAAGATTCAATCAATCATCG  
GGTTCAAACAGCAGGTCACTTCGGGGGATCGTTTTACCGGTGAGAAGATCGTGATCACCGGTTTTCTGTGACGCGGCTTGG  
AGAAGCTGATTGAAGCTGAGGGTGGTGAAGTGCAATCATCAGTCTCGTCGAAGACCACCATGGTGATCGCGGCATCCACTTC  
CGGATCTTCCGGCAAATTGAAGAAAGTGACGATCTCAACAACAGCGGAAAGGCAAATATCAAAGTATTGATCTGGCCACC  
TTCCGTAAGCAATATCTGGAACAACCAGCATCGACTGGTTTTGAGTTTTAATGAGTCACCCACAACCTTGAGCTAATAGTCGCT  
GTGGATTCTAAGTTGGGATTTCGGGAAAGGCGGCAAGATTCATGGAAATGCAAAGAAGACATGGCGCGATTTACGCGGATT  
TCTAAAGAGATCCGCGTGTGCGTTATGGGGAAACACACGTATACTGACATGCGTGACATGCAGTTAGAAAAGGATGGCGCCG  
AGGAGCGAATCAAGGAGAAAGGAATTTCCCCGAACGCGAATCGTTTCGTGATCTCCTCGACGTTAAAACAAGAAGATGTCAT  
AGGCGTACTGTGTTCTGATCTTCGTGCTGTGATCAACCTGTATGAGAATACCGATCAACGCATTGCTGTCATTGGTGGGGA  
GAAGTTGTACATTCAAGCTCTTTCATCAGCAACGAACTGCACATGACCATAATTCCAAGAGAGTTCGACTGTGATCGATTTAT  
TCCTGTTGATCCGATCCAGAACAATTTTACATTGATTCCAGTGCCAGCGAGACTGTGGAGGCAACCGTTGATGAGACTCAAG  
AGCGCATTCACTTTGCTACTTACGTGCGTAACAATCAGTAACGCGCTGGCAGTGGAAGAACAAGAACCAGAAACGAAGCAG  
ACGGTGTGGCCGTCTGCTTCGAAACATCATTATTGGCTCGAGAATGATCGAGAATACCATTCTTGCAGGACGACATCCAAAA  
CAATACAGAAAAGATAGCTTTGCAGTTGTCGGAGCCCCCTCCCCAACTTATAATGGGATTATTGCTGGGCTAAACAATGCTGTC  
GCCATGCGTGGGACAGCAAACGTTGAATCGCCATCAAGAGCATCCACAGATTTACGTGCAGCCGTCATCGGTTTATGGTGTAT  
AAATGACACCATAGCCGCCCTGAATCAGACTGATAATGCAGTCTTACAGGACGGCGAGTTGCAACAAACACTTGTGCTGATT  
ACAACAACCTTATTGGCTGACATCGTTTGTGCTTTTTCAGAAGACGGCTGCACTGAACGTCAGAAGCCGACTGCACTATAGCAGC  
GGAGGGGTTGGATCCATCAGGCAACGACGGGCTGCTGCCGGCCATCAGCGGACGCAGGGAGGACTTTCCGCAACCGGCCG  
TTCGATGCGGCACCGATGGCCTTCGCGCAGGGGTAGTGAATCCGCCAGGATTGACTTGCCTGCCCTACCTCTCACTAGTGA  
GGGGCGGCAGCGCATCAAGCGGTGAGCGCACTCCGGCACCGCCAACCTTTCAGCACATGCGTGTAATCATCGTCGTAGAGA  
CGTCGGAATGGCCGAGCAGATCCTGCACGGTTCGAATGTCGTAACCGCTGCGGAGCAAGCCGTCGCGAACGAGTGGCGG  
AGGGTGTGCGGTGTGGCGGGCTTCGTGATGCCTGCTTGTCTACGGCACGTTTGAAGGCGCGCTGAAAGGTCTGGTCATAC  
ATGTGATGGCGACGCACGACACCGCTCCGTGGATCGGTGCAATGCGTGTGCTGCGCAAAAACCCAGAACCACGGCCAGGAA  
TGCCCGGCGCGGATACTTCCGCTCAAGGGCGTCGGGAAGCGCAACCGCTGCGGCCCTCGGCCTGCTCCTCAGCCAC

CATGCCCGTGACGCGACAGCTGCTCGCGCAGGCTGGGTGCCAAGCTCTCGGGTAACATCAGGCCCGATCCTTGGAGCCCTT  
GCCCTCCCGCACGATGATCGTGCCGTGATCGAAATCCAGATCCTTGACCCGCAGTTGCAAACCCTCACTGATCCGCATGCCCG  
TTCATACAGAAGCTGGGCGAACAAACGATGCTCGCCTTCCAGAAAACCGAGGATGCGAACCACTTCATCCGGGGTCAGCAC  
CACCGGCAAGCGCCGCGACGGCCGAGGTCTTCCGATCTCTGAAGCCAGGGCAGATCCGTGCACAGCACCTTGCCGTAGAA  
GAACAGCAAGGCCGCAATGCCTGACGATGCGTGAGACCGAAACCTTGCGCTCGTTCGCCAGCCAGGACAGAAATGCCTC  
GACTTCGCTGCTGCCAAGGTTGCCGGGTGACGCACACCGTGGAACCGGATGAAGGCACGAACCCAGTGGACATAAGCCTG  
TTCGGTTGTAAGCTGTAATGCAAGTAGCGTATGCGCTCACGCAACTGGTCCAGAACCTTGACCGAACGCAGCGGTGGTAAC  
GGCGCAGTGGCGTTTTTCATGGCTGTTATGACTGTTTTTTTTGTACAGTCTATGCCTCGGGCATCAAGGCGAGCTCAGAGACC  
ATGGAAAGCATGTTCTCGGACTTACGTAGCAACTCGTTTTCTTTTCGCAGGTTGAGCCACCTCCGCGCTTCATCAGAAAATGA  
AGGAACCTCCATTGAATCGAACTAATATTTTTTTTTGGTGAATCGCATTCTGACTGGTTGCCTGTCAGAGGCGGAGAATCTGGT  
GATTTTGTTCGACGTGGTGACGGGCATGCCTTCGCGAAAATCGCACCTGCTTCCCGCCGCGGTGAGCTCGCTGGAGAGC  
GTGACCGCCTCATTGGCTCAAAGGTCGAGGTGTGGCTTGCCCCGAGGTGATCAACTGGCAGGAGGAACAGGAGGGTGCA  
TGCTTGGTGATAACGGCAATTCCGGGAGTACCGGCGGCTGATCTGTCTGGAGCGGATTTGCTCAAAGCGTGGCCGTCAATGG  
GGCAGCAACTTGGCGCTGTTACAGCCTATCGGTTGATCAATGTCCGTTTGAGCGCAGGCTGTGCGAATGTTCCGGACGCGC  
CGTTGATGTGGTGTCCCGCAATGCCGTCAATCCCGACTTCTTACCGGACGAGGACAAGAGTACGCCGCAGCTCGATCTTTGG  
CTCGTGTGCAACGAGAGCTACCGGTGCGGCTCGACCAAGAGCGCACCGATATGGTTGTTGCCATGGTGATCCCTGCATGCC  
GAACTTCATGGTGGACCCTAAAACCTTCAATGCACGGGTCTGATCGACCTTGGGCGGCTCGGAACAGCAGATCGCTATGCC  
GATTTGGCACTCATGATTGCTAACGCCGAAGAGAATGGGCAGCGCCAGATGAAGCAGAGCGCGCCTTCGCTGTCCTATTCA  
ATGTATTGGGGATCGAAGCCCCCGACCGCGAACGCCTTGCTTCTATCTGCGATTGGACCCTCTGACTTGGGGTTGATGTTCA  
TGCCGCTGTTTTCTGCTCATTGGCACGTTTCGCAACCTGTTCTCATTGCGGACACCTTTCCAGCCTCGTTTGGAAAGTTT  
CATTGCCAGACGGGACTCCTGCAATCGTCAAGGGATTGAAACCTATAGAAGACATTGCTGATGAACTGCGCGGGGGCCGACTA  
TCTGGTATGGCGCAATGGGAGGGGAGCAGTCCGGTTGCTCGGTCGTGAGAAACAATCTGATGTTGCTCGAATATGCCGGGGA  
GCCAATGCTCTCTCACATCGTTGCCGAGCACGGCGACTACCAGGGCAGCCGAAATTGCAGCGGAACTAATGGCGAAGCTGTAT  
GCCGCATCTGAGGAACCCCTGCCTTCTGCCCTTCTCCCGATCCGGGATCGCTTTCAGCTTTGTTTCAGCGGGCGCGGATGA  
TCAAACGCAGGTTGTCAAACCTGACTACGTCCACGCGGCGATTATAGCCGATCAAATGATGAGCAATGCCTCGGAACTGCGT  
GGGCTACATGGCGATCTGCATCATGAAAACATCATGTTCTCCAGTCGCGGCTGGCTGGTGATAGATCCCGTCCGCTGGTCCG  
TGAAGTGGGCTTTGGCGCCGCAATATGTTCTACGATCCGGCTGACAGAGACGACCTTTGTCTCGATCCTAGACGCATTGCAC  
AGATGGCGGACGCATTCTCTCGTGCCTGGACGTCGATCCGCGTCGCTGCTCGACCAGGCGTACGCTTATGGGTGCCTTTCC  
GCAGCTTGAACGCGGATGGAGAAGAGGAGCAACGCGATCTGGCTATCGCGGCCGCGATCAAGCAGGTGCGACAGACGTC  
ATACTAGGGGTCGTCTCAGAATTCGGAAAATAAAGCACGCTAAGGCGTAGTCAACCCGACTCCCGCGCCGATGCAGCGA  
GCTTCGTTCCGTCTTGACGTGACGCAATCAGCGGGCAGGAAACGTTCCCTTTCCGCGCATGGCAGGCGCACACCAGTTCAGA  
CAGCACGGCCTCCATGCGTGCCAAGTCGGCCATCTTCTCGCGCACATCCTTGAGCTTGTGCTCGGCCAGGCCGCTGGCTTCT  
CGCAATGGGTGCCATCCTCCAGCCGAGTAGCTCGGCGATTTCTGTCAGGCTAAAGCCCAGCCGCTGGGCCGATTTACGAA  
CCGCACTCGTGTTACATCCGCCTCGCCATAGCGGCGAATGCTGCCATAGGGCTTGTCTGGCTCCGGCAGCAGGCCCTTGCCT  
GGTAGAACCGGATGGTCTCCACATTGACCCCGCCGCTTGGCAAAAACGCCAATGGTCAGATTCTCAAATAATTTGCATA  
TCGCTTGACTCCGTACATAACTACGGAAGTAAGCTTAAGCTATCAAACCAATTTGAAAGGACAAGCGTATGTCTGAACCAC  
AAAAGTCTGAACCACAAAAGTCTGAACCACAAAACGGGCGCGGCGCTCTTCGCCGGTGGGCTGGCCGCCATTCTTGCCT  
CGGCCTGCTGCTGGGGCCGCTGGTTTTGATCGCCTTGGGGTTCAGCGGGGCATGGATCGGCAACCTGACGGTGTGGAACC  
CTATCGCCGATCTTCATCGGCGCAGCGCTGGTCCGCTGTTTTTCGCTGGCGGCGCATCTACCGCCCGCGCAAGCCTGCA  
AACCGGGTGAGGTCTGCGCGATTCCCAAGTGCAGACTACTACAAGCTCATTTTCTGGATCGTGGCCGCGCTGGTCTGGT  
CTCGCTCGGATTTCCCTACGTCATGCCATTTTTCTATTAATCACAGGAGTTCATCATGAAAAACTGTTTGCCGCCCTCGCCCTC  
GCTGCCGTTGTTGCCCCGTGTGGGCCGCCACCCAGACCGTCACGCTGTCCGTGCCTGGCATGACCTGCGCCTCTTGCCCGAT  
CACTGTCAAGCACGCGTTTTCCAAGGTTGAGGGCGTGAGCAAGACCGACGTAAGTTTCGACAAGCGCCAGGCCGTCGTCAC  
CTTCGACGATGCCAAGACCAACGTCCAGAAGTTGACCAAGGCGACCGAGGACGCGGGCTATCCGTCCAGCCTCAAACGCTG  
ATCCGTTAACCGAACTCGGGAGCGACACATGGGACTCATCACGCGCATCGCTGGCAAAACCGGCGCGCTCGGCAGCGTCGT  
TCCGCGATGGGCTGCGCCGCTGTTTTCTGCCATCGCCAGCTTGGCGCGGCCATCGGACTGGGCTTCTGAGCCAGTAC

GAGGGGCTATTCATTGGCATCCTGCTGCCGATGTTCCGGCATCGCGTACTCGCCAATGCTATCGCTTGGCTCAATCATCGA  
CAGTGGCGACGCACGGCGCTCGGCACGATAGGCCGATCTTGGTGCTGGCAGCGGTGTTTTAATGCGGGCTTACGGCTGG  
CAGAGCGGTGGACTGCTCTATGTCCGCTGGCCTTGATGGTTGGGGTGTGGGTCTGGGATTCATCTCGCCAGCACATCGCC  
GCTGCGGGCCGGACAGCTGTGAATTGCCAGAACAACGTGGCTGACGGCAACAGCCGTAGCCACCACAGAAAAGGAAAAAT  
ACATGACCACCCTGAAAATCACCGGGATGACCTGCGACTCGTGC GCGGCTCACGTCAAGGAAGCCTTGGAGAAAAGTGCCCG  
GCGTGCAATCGGCGCTGGTGTCTATCCGAAGGGCACAGCGCAACTCGCCATTGAGGCGGGCACGTCATCGGATGCGCTGA  
CTACCGCCGTGGCCGGACTGGGCTACGAGGCAACGCTTGCCGATGCGCCACCGACGGACAACCGCGCCGGCCTGCTCGACA  
AGATGCGCGGCTGGATAGGGGCCGCTGATAAGCCAGTGGCAACGAACGCCGTTGCAGGTCGTGCTCATTGGTAGCGGTGG  
AGCCCGATGGCGGCAGCACTGAAGGCCGTCGAGCAAGGCGCGCAGGTACGCTGATTGAGCGCGCACCATCGGCGGCA  
CCTGCGTCAACGTCGGTTGTGTCCGTCCTAAGATCATGATCCGCGCCGCCACATCGCCATCTGCGCCGAAAGCCCATTG  
ACGGCGGCATGCCACCCACACCGCCGACGATCTTGCGCGAGCGGCTGCTGGCCCAGCAGCAGGCCCGTGTGCAAGAACTCC  
GTCATGCCAAGTACGAAGGCATCCTGGACGGCAATCAGCCATCACCGTTCTGCACGGTGAAGCGCGTTTTCAAGGACGACCA  
GAGCCTTATCGTTAGTTTGAACGAGGGTGGCGAGCGGTCGTGATGTTGACCGCTGCCTGGTGCACGCGGTGCCAGCCC  
GGCGGTCCC GCCGATTCCGGGCTTGAAGAGTACCCTACTGGACTTCCACCGAGGCCCTGGCGAGCGACACCATTCCCGA  
ACGCCTTGCCGTAATCGGCTCGTCCGTTGGTGGCGCTGGAGCTGGCGCAAGCCTTTGCCGGCTGGGCAGCAAGGTCACGGC  
CCTGGCGCGCAATACCTTGTCTCCGTGAAGACCCGGCCATCGGCGAGGCGGTGACAGCCGCTTTCCGTGCCGAGGGC  
GAGGTGCTGGAGCACACGCAAGCCAGCCAGGTCGCCATATGGACGGTGAATTCGTGCTGACCACCACGCACGGTGAATTG  
CGCGCCGACAAGCTGCTGGTCCGACCGGCCGACACCGAACACGCGCAGCCTGGCATTGGAAGCGGCGGGGGTAGCCGT  
CAATGCGCAGGGGGCCATCGTCATCGACAAGGGCATGCGCACCAAGTAGCCCGAACATCTACGCGGCCGGCGACTGCACCGA  
CCAGCCGAGTTGCTCTATGTGGCGGCAGCGGCCGCACTCGTGC GCGGATCAACATGACTGGCGGCGATGCGGCCCTGGA  
CCTGACCGCAATGCCGGCCGTGGTGTTCACCGACCCGCAGGTCGCCACCGTGGGCTACAGCGAGGCGGAAGCACATCACGA  
CGGGATCGAGACCGACAGTGCCTGCTAACACTGGATAACGTGCCGCGTGCCTTGCCAACTTCGACACACGCGGCTTCATC  
AAGCTGGTATCGAGGAAGGTAGCGGACGGCTCATCGGCGTGAAGCGGTGGCCCCGGAAGCGGGTGAAGTATCCAGAC  
GGCGGTGCTCGCCATTCGCAACCGTATGACCGTGCAGGAAGTGGCCGACCAATTGTTCCCTACCTGACCATGGTGAAGGG  
CTGAAGCTCGCGGCGCAGACCTTCAGCAAGGACGTGAAGCAGCTTTCGTGCTGCGCCGATGAGGAAAGGAGGTGTTCAA  
TGAGCGCTACACAGTGTCCCGCTGGCCCTTGATGCCGGGGTGAGCGTGCATATCGTGC GCGACTACCTGCTGCGCGGATT  
GCTACGGCCGGTGCCTACACCACGGGCGGCTACGGCTTGTTCGATGACACCGCGTTGCAACGGCTGCGCTTTGTACGGC  
TGCCTTCGAAGCGGGTATCGGCCTGGACGCACTGGCGCGGCTGTGCCGGGCGCTGGATGCTGCGGACGGTGACGGTGCCT  
CTGCGCAGCTTGCCGTGTTGCGGCAACTCGTCGAGCGTGC GCGCGGGGCCCTGGCCAGCCTCGAAATGCAACTGGCCGCCA  
TGCCAAACCGAACCGGCACAGCAGCGGAGAGTCTGCCATGAACAGCCCAGAGCACTTGCCGTCTGAGACGCACAAACCGAT  
CACCGGCTACTTGTGGGGCGCGCTGGCCGTGCTCACCTGTCCCTGCCATTTGCCGATTCTCGCCATTGTGCTAGCCGGCACGA  
CGGCCGGCGCGTTCATCGGGGAGCACTGGGGTATTGCAGCCCTCACGCTGACCGGCTTGTGTTGCTGCTGTGACGCGGCT  
GCTGCGGGCCTTCAAGGGAAGATCATGACCGCTTCCCAGCCAGCCGAGAGTGGGCAGCTTTGAGCTTCGCTACCAATCTGG  
AGGAGTACCACCATGAACGCAAAACGCCCGAACACTGCCAGTTGCACCACCTGCTGCGTATGCTGCAAAAGAAATTCGCTC  
GATGCCGCTTACCCCGGAAGGCGCGGAATACGTGCAACATTTCTGCGGGCTGGATTGCTATGAACGCTTCCAGGCACGCG  
CCAAGGCCGCGACAGAATCTGACATTGCGCCTGTCCCTGGCGGTTGCGAGCCGTGAGATTGAGGCATAACCTAATTGATGTC  
AGATGCCATGTGCAACGATGTCAGAATAGAGTTAAATTTCTATTGATTGACATATTCGTCAAAGGTAATAGATTTATCCTG  
ACACTTTTGCCTTTGGAGGCATCTTGCAAGGTCAACGCATCGGCTATGTCCGCGTCAGCAGCTTCGACCAGAACCCGGAACG  
GCAATTGGAGGTGTTCAAGTGGCGCGGGTGTTCACCGACAAGGCTTCTGGCAAGGACACCCAGCGTCCCAGACTGGAAAG  
GCTGCTGGCCTTCGTCCGCGAGGGCGACACCGTGGTGGTGCATAGCATGGACAGGCTGGCACGCAACCTTGATGACCTGCG  
CCGCATCGTCAAGGGCTGACACAACGGGGCGTGC GCGATGGAGTTCGTCAAAGAAGGGCTGAAGTTCACCGGCGAGGACTC  
ACCGATGGCCAATCTGATGCTGTCCGTCATGGGAGCCTTCGCTGAGTTCGAGCGCGCCTGATCCGCGAACGTCAGCGCGAG  
GGAATCGTGCTGGCCAAGCAGCGCGGTGCCTACCGGGGACGAAAGAAATCGCTGAACAGCGAACAAATTGCCGAGTTGAA  
ACGGCGAGTTGCGGCAGGCGACCAAAAAACCTTGGTGGCCCGTACTTCGGCATCAGCCGCGAACCTTGTACCAGTACCT  
GCGGGAAGACTGACCATGCCACGCCGCTCAATCCTGTCCGCCACCGAGCGCGAAAGCCTGCTGGCACTGCCAGATGCCAAA  
GACGAACTGATACGGCACTACACGTTCAACGAAACCGACCTGTCGGTGATCCGTCAGCGTCGCGGGCGCCGCGAATCGATTGG



GCTTCGCTGTGCAGCTTTGCTACTTGGCATTCCCTGGCACCTTTTTGGGCGTCGATGAGCCTCCGTTTTCCGCCCTGTTGCGC  
ATGGTGGCCGCGCAACTCAAGATGCCAGTGGAAAGTTGGAGCGAGTACGGCCAGCGCAACAGACACGGCGGGAGCACTT  
GGTCGAGCTGCAAACGGTTTTTGGGTTCAAGCCCTTACCATGAGCCACTATCGGCAAGCCGTGCATACATTGACCGAGCTG  
GCCTTGACAGACCGACAAAGGCATCGTGCTGGCGAGCGCACTTGTGAGAATCTGCGGGCGCAGAGCATTATCCTGCCCGCC  
ATGAATGCCATCGAGCGCGCAAGCGCCGAGGCCATCACCCGTGCCAACCGACGCATTTACGCGGCGTGACCGATTCTTTGT  
TATCACCCACCGTCAGCGCCTGGACGAACTTCTCAAGCGCAAGGACGGCAGTAAAGTGACGTGGCTGGCATGGCTGCGCC  
AGTCGCCTGCCAAACCGAACTCTCGCCACATGCTCGAACATATTGAGCGCCTGAAATCCTGGCAAGCACTTGATCTGCCCGCA  
GGCATCGAGCGGCAGGTTACCAGAACCGCCTGCTCAAATCGCTCGTGAAGGTGGCCAGATGACGCCTGCTGATCTGGCA  
AAGTTCGAGGTGCAACGACGCTATGCCACGCTGGTAGCGCTGGCCATCGAAGGCATGGCCACCGTCACCGATGAAATCATCG  
ACCTTACGATCGCATCATCGGCAAGCTGTTCAACGCGGCCAAGAACAAGCATCAGCAGCAGTTCCAGGCTTCCGGCAAGG  
CGATCAACGACAAGGTGCGGATGTATGGGCGCATCGGTCAAGCGTTGATTGAGGCCAAGCAAAGCGGCAGCGATCCGTTCCG  
CCGCCATCGAGGCCGTTATGCCCTGGGACACCTTCGCCGCCAGCGTCACCGAAGCGCAAACATTGGCGCGGCCTGCCGACTT  
TGATTTCTGCACCACATCGGTGAAAGCTATGCCACGCTACGCCGCTACGCGCCGAGTTTCTGGGCGTGCTCAAATTGCGGG  
CTGCGCCCGCCGCAAAGGTGTGCTCGATGCCATCGACATGCTGCGCGCATGAACAGCGACAGCGCGCGCAGGTGCCCGC  
CGATGCGCCAACCGCATTATCAAGCCGCGCTGGGCAAAGCTGGTTCTGACCGACGACGGCATCGACCGGCGTTACTACGA  
GTTATGCGCCCTGTCGGAGCTGAAGAACGCGCTGCGCTCCGGTGATGTCTGGGTGCAGGGTTCTCGCCAGTTCAAGGACTTC  
GACGAATACCTGGTGCCGGTCGAGAAGTTCGCCACTTTGAAGCTGGCCAGCGAATTGCCGCTGGCAGTGGCCACCGACTGC  
GACCAATACCTGCATGACCGGTTGGAATTGTTGGAGGCGCAACTCGCCACAGTCAACCGCATGGCTGCGGCCAACGACTTAC  
CGGATGCCATCATCACACCGGTCAGGCCTGAAGATCACGCCGCTGGACGCGGGCGGTACCAGACGCCGCGCAAGCCATGA  
TCGACCAGACAGCTATGCTGCTGCCGCACCTCAAATCACCGAGTTGCTGATGGAGGTCGATGAATGGACGGGCTTACCCG  
CCACTTACACACCTGAAGACCAGCGACACGGCCAAGGACAAAACCTTGCTGTTGACGACGATCCTGGCCGACGCGATCAA  
CCTGGGTCTGACCAAATGGCCGAGTCTTGCCCTGGCACCACCTACGCCAAGCTGTCTTGGCTGCAAGCACTGGCACATCCG  
CGATGAAACCTATTGACGGCGCTGGCCGAGCTGGTGAATGCGCAGTTTTCGGCAACCCCTTCGCCGGCAACTGGGGTGACGG  
CACCACGTCATCGTCGGACGGCCAGAACTTCAGAACCGGCAGCAAAGCAGAAAGCACTGGTCATATCAACCCGAAGTATGG  
AAGCAGTCGGGACGGACTTTCTACACCCATATCTCCGACCAGTACGCGCCCTTCAGTGCCAAGGTGGTCAACGTGGGCATTC  
GTGATTCAACTTACCGTGCTTGATGGCCTGCTGTACCACGAGTCGGACTTGCGCATCGAGGAACACTACACCGACACGGCAG  
GCTTACCCGATCACGTGTTTGGCTTGATGCATTTGCTGGGATTTGCTTTCGCGCCGCGTATCCGTGACTTGGGCGAAACCAAG  
CTATTCATCCCAAGGGCGATGCCGCCTATGACGCGCTCAAGCCGATGATTAGCAGCGACAGGCTGAACATCAAGCAAATACG  
CGCCATTGGGATGAAATTCTGCGGCTGGCCACCTCCATCAAGCAGCAAGGCACGGTAACGGCTTCGCTGATGCTGCGCAA  
CTCGGCAGTACCCGCGCCAGAACGGCTTGGCCGTGGCGTTGCGCGAGCTGGGGCGCATCGAGCGCACGCTGTTCATTTTT  
GGATTGGCTGCAAAGCGTGGAGCTGCGCCGCGCGTCCATGCGGGGCTGAATAAGGGCGAGGCGCGCAACGCGCTGGCCA  
GGGCGGTCTTCTTACCGATTGGGTGAAATCCGCGACCGCAGTTTTGAGCAGCAGCGCTACGGGCCAGCGGCCTCAATCTG  
GTGACGGCGGCCATCGTGTGGAACACGGTATATCTGGAGCGTGCCACCAGTGCTTTGCGTGGCAACGGCACGGCGCTG  
GACGACACATTGTTGCAATATCTGTCGCCGCTGGGGGTGGGGCACATCAACCTGACCGGCGATTACCTATGGCGCAGCAGCG  
CCAAGGTCGGTGCGGGGAAGTTTAGGCCATTGCGACCGCTGCCACCGGCTTAGCGTGCTTTATTTAATGAGATGGTCACTCC  
CTCCTTCCGGTACTATGCTGAGGACAGGCTTTTATTTCGGAGAACTATCATGAAAACATTGCGCTCATTGGTATCGATCTGGGT  
AAAACTCTTCCATATTCATTGCCAGGATCGTCGCGGGAAGGCTGTTTACCGTAAAAAATTTACCCGGCCAAAGTTGATCGA  
ATTTTTGGCGACATGCCCGCTACAACCATCGCAATGGAAGCCTGTGGCGGTTCTCACTTTATGGCACGCAAGTTGGAAGAG  
TTGGGGCATTCCCAAGCTGATATCACCAATTTGTCCGCCGTTCTGTTAAAAGCAATAAAAACGACTTTGTGACGCGGA  
AGCTATTTGTGAAGCTGCATCGCGTCCGTCTATGCGTTTTGTGACGCCAGAACGGAATCTCAGCAGGCAATGCGGGCTCTGC  
ATCGTGTCCGTGAATCCCTGGTTCAGGATAAGGTAAAAACAACCAATCAAATGCATGCTTTTCTGCTGGAATTTGGCATTAGCG  
TTCCCGAGGAGCTGCCGTTATTAGCCGACTGAGTACCATTCTTGAGGATAATAGTTTGCCTCTTTACCTCAGCCAGTTATTGCT  
GAAATTACAACAGCATTATCACTATCTTGTGAGCAGATTAAGATTTGGAATCCCAGTTGAAACGAAAGTTGGACGAAGATG  
AGGTTGGACAGCGCTTGCTGAGCATTCCCTGCGTCGGAACACTGACAGCGAGTACTATTTCAACTGAGATTGGCGACGGGA  
AGCAGTACGCCAGCAGCCGTGACTTTGCGGCGGCAACAGGGCTTGACCTCGGCAGTACAGCACGGGAGGTAGGACGACA  
TTGCTGGGAATTAGTAAGCGAGGTAATAAAAAGATCCGAACCTTGTGGTTCATGTGCCAGGGTATTCATACAAAACCTGGA

ACACCAGTCTGGCAAATTGGCCGATTGGGTCAGGGATTTACTGTGCCGAAAAGCAACTTTGTCGTCACCTTGCTCTGGCA  
AACAAAGCTGGCCAGAATAGCCTGGGCCCTAACGGCACGACAGCAAACCTTATGTAGCATAACGGCAGAAATACACCGGTTTAA  
AGAATTACTGATCTGGTTTTGCGAATACTGATTTGATGATACTAACGGCCACCGGCCTGTTGAGGAACCTGTAAAACGGAA  
AGGCTCATTGAAGCCGTATATTTTCTGGAGGTTTCATCAGGCGCGAACTCATCAAGGCGCGGGAATAAAATCCATTTCAGACG  
CCGGATAGATTCAAGCAAGCCAACTTGTCTGTCAAAATCGGTGTTGCAAAAACGGGAGTGACCATAGATTCCGTTTTCTGAGA  
CGACCCCTACTAGATATCAAGCGACTTCTCCTATCCCCTGGGAACACATCAATCTTACCGGAGAATATCGTTGGCCAAAGCCTT  
AGCGTAGGATTTCCGCCCTCTCCCGCAAACGACCCCTAAAAGCCGTTTCTCTGTATAAAAGATCAGCTAAATTATGTGTATTGC  
ACAATACATATATGTGAGGTTAGCAGTGAATTTGCCTACGCCGAAAACCTACGATGAACTTCAGAGAGCCTACGATTTTTTCAA  
TGAGAAGCTATTAGCAACGAGCTGCCGCCATGCCTGATAACGTTGCAGCGTGAGAAGCGAACGTATGGCTATTGTTCTTTA  
AGCGTTTTCGTCGGCCGTGAGAGTGGGTACACGGTAGACGAGATCGCTATGAATCCGGTGTATTTCTCGATCAGAACCATAAAG  
GCCACGCTTTCAACACTGGTGCATGAGATGGTTCATCAGTGGCAATTCATTTTGGCGAGCCTGGCCGCCGTGGCTATCACAA  
CAAACAGTGGGCGGCCCGGATGGAACGGGTAGGACTAATGCCTTCTGATACCGGCGAACCGGGAGGCAGGAAAGTGGGCC  
AGAGCATGACCCATTATATTATTGCCGGTGGCCCTTTCGATATGGCCTGTGATGAACTGCTGACAGGCCATTTCCAGCTTTCCT  
GGATGGACAGGTTTCCGCCTTACCAGCCTAAGCCTGGCGCTGTGCTAAGCCCTACAGGAAAAGGCTATATTGACGACGAGGA  
AGATGATAGCGAACACGAACAGGAGGTGGAGGAAGGGCGCGACCCGGTTGAACTCGACGACGAGATCATAGAGGCCATGC  
GATTTGTAACCCACCGCCTGAAGCACCGGTGAACAAAACAAACCGGGAAAAGTACAGCTGCCCGGTGTGTCATATCAATCT  
CTGGGGTAAACCGGGGATAGTGGTTTACTGTGGTGGCGAGCACTGTAATAAAGCCGCGTTAGTAGTCTTAAATAAAGTCCTT  
TCGGACTTTATTTTTTTTCCATTTCCGAGGTCGTGATGTTATTAATGCTGTACTTCGCGGCTTCTTTAAAACAGTTTCAGCAAG  
GCTTGCTGGTATCCAGACCTGAACTAATTTAATGGTTCGCCGTTCTCGGCTTAAAGAGTGGTGTCTGGTACAAATCCCAGAT  
TCGCTTAACGGTGTGGAATGTTTTGCTTGAACGGCCTACTCGCGTGGCTACGCTGTGATGATTTCTCACCTTTGACAAGCA  
CGGAATAGCCAATATCTGTTGTGATGTGTGCAAAGGAAGCCATTTGCGGCAGCAGCTGTTTCCATTCTGTTTCTGAAATTCTGT  
TTTTCTGAGCCATCTGTGGCGCCTCCGTAGTTTTGGTTACAGAAAGGATATACTCAGAATAAACAGGGGTCAATACAAGTACG  
ATTTTTATAAACTTTATTTTATTGAGGGTGAAGCCCGGTGCGGCAGCAGCGCGCGGCCCTCGATGGTGGCCGGAAGGTGCT  
GGCGCCATGCTCGGATTAACATGAACCGTGAAGAACTGCGAAACTGTTTTTCGCGGTTCTGAGGGTTGACCGAGCCGCG  
AAGCGGCGCTGGTAAGCGATGATATGCACATATCCACAGGCATATTTTTAAAAGGGGCACTGTTGCAAAGTTAGCGATGAGG  
CAGCCTTTTGTCTTATTCAAAGGCCTTACATTTCAAAAACCTGCTTACCAGGCGCATTTCCGCCAGGGGATCACCATAATAAA  
ATGCTGAGGCCTGGCCTTTGCGTAGTGCACGCATCACCTCAATACCTTTGATGGTGGCGTAAGCCGTCTTCATGGATTTAAATC  
CCAGCGTGGCGCCGATTATCCGTTTTCAGTTTGCCATGATCGCATTCAATCACGTTGTTCCGGTACTTAATCTGTGCGGTGTTCAAC  
GTCAGACGGGCACCGGCCTTCGCGTTTGAGCAGAGCAAGCGCGGACCATAGGCGGGCGCTTTATCCGTGTTGATGAATCG  
CGGGATCTGCCACTTCTTACGTTGTTGAGGATTTACCCAGAAACCGGTATGCAGCTTTGCTGTTACGACGGGAGGAGAGA  
TAAAATCGACAGTGCGGCCCCGGTGTGCGACGGCCCGGTACAGATACGCCAGCGGCCATTGACCTTACGTAGGTTTCAT  
CCATGTGCCACGGGCAAAGATCGGAAGGGTTACGCCAGTACCAGCGCAGCCGTTTTTCCATTTAGGCGCATAACGCTGAAC  
CCAGCGGTAAATCGTGGAGTGATCGACATTCACTCCGCGTTCAGCCAGCATCTCCTGCAGCTCACGGTAACTGATGCCGTATT  
TGCAGTACCAGCGTACGGCCACAGAATGATGTCACGCTGAAAATGCCGGCCTTTGAATGGGTTTCATGTGACGCTCCATCAGC  
AAAAGGGGATGATAAGTTTATCACCACCGACTATTTGCAACAGTGCCGGTGCAGGGGAGTCAGCAGATCGACGTCAACGCCG  
AGCAGCGATTTAGTTCTTCTTCCAAATCGCCCAAGTCCAACAACGTGGCACCGGGCAGCGCATCGACCAACAGGTGAGGT  
CGCTGCCATCCCGGTCGGTGCATGCAGCACCGAGCCGAAGACGCGCGGGTTCGCGGCGCGAAAGCGGCCTACCGCTTAC  
GCACTGCGCTTCGCTTCATGTCAAGCACAACAGACGGTGCATGCGCATCCTTTCTTATCGAAACTCGTTGAGATGATATGCAA  
TCAAGAATAGAATTTCAAGAACTCACAAAGTAACGCGGTGGTTAATATCCTGTACCCACGGATTGCCCTTAGCGCTGCCTATAT  
CGGCTAAAGCACTCCGGTAGCTTGATTCACCCACGGCCACGGCAGGATCTTGGCCGTCGCAAGCGCCAGGGGAAAATCTT  
CAGCTGCAAGCCTGAGTGATTTTCATGTGCGTGTAATCCATCGCCAGATGATTTTTGTGAAGAAGAACTCGCGCTCGTTTCATG  
TCCGGGCGCGCTCCTGGCCCTCCGTGCCAACGGCCAGCAAGTAATCGGCCTGAATTGGCAGTATCAGCGCGCGTAGTAAGT  
CATGGATCGCCGTTGCGGCAGTCTGCGCGCCAGATTAATACCCGGTGAACCTCAGTTTATCCTGCTTGCCTTGTGCGTCT  
GCTCCATCAGATTTTCATGGCCCCCTTCTTCATGCTCATGCTCATGGGTGTGTTCTTTTCCGGTATGGCTCTGTTCCGCCTGAGAC  
GTCTGCGGCATGGCGTAATCGTCGTAATGCTGCTGTCAAAGTCGTAGTCTGATGCTTCGGCATAATGCTCGTAATCGGCATAC  
TCCTGCGCGCTCCACTGCTGATCGTCGGCAGCAGCATAATCATGGGCCAGCTCTGCATCATTTTGTGCTGTGCTTCATGACGCCG

AGGCCAACGGAATCATCCATAGGGTTCTGCTTAAGATGAAAGGCGTCCTCTGCGTTGCTCACCGGCTGATAATCAGTGCCGGT  
TGTCATGTTATGTTTCATCGGGTTTCTGGTTAAACGCCATGCTTTCCCCCGTGGCTTCTGGCAGACCTTTTTTCAGCTGATCGGGT  
TTCTAAACTGGTATCGCGGCCAATATCCTTAAACCTGGCCTCAAGCCAAAGAAACGGTCAATTTCTGCGGCCGTGGTTTTCTG  
GGCTGTGCGGGCTCACGCTCGATGCCAAAGATTTTTTATCGTCGGTAAAAATTTCCACCTCATGACGCGCACGCGAAATACCA  
ACATAAAAAACGTCCTTAGAAGTGGAAGCGATTTGGTATCTATGTTGAACAACACGCGATCACAGGTAAGCCCTTGGGATTT  
GTGGACGGTGGTTGCATAAGCATAGGAAAGATAAGAAGCCTGTTTTTTGTCCAGCTCAACCGTGCGCCCTTTTTTTGTCTCAA  
GCGTCAGTTTTTACCCTCCACGGTTTTTACCCTGTAAGCGGTGCGCCGTTGGCAACGTCCAGCGTTTTTATCGTTACGCGTTACC  
ATAACCTTATCGCCCGGCGCCAGTTCGGCGCTGACTGCCTGGTATACAGACAGCTTGGTGTGTGTACGCGGGCTGAAAGCGA  
TCTGCTCACCGCTGCTGCTTTCAACCGTCAATTTGTTGCCGGCCCGGTATCAAGAACCTGGTAAGACTCGCCCCGCTTCATAC  
CATTTTTGTAATCCTGTTTCGGGGATAATGATTTGCCCTTACTGAAATAACGGCTGTCGCGGCGTTCCGCCTGTGTCGAATCCA  
CGCGGTCAAGTAGCGTGAACGTTTTCGCCGTTCCGGCAAGCCCCAGATTGCCCGGATGTAGTCATTGAGGGTTTTGCGTGA  
GGCGTTCGTACCAGAGATTATCAGGGTGGCATCCTGTTGTTCTGAGGACAGAGACAGGTAGCGATCGGCAAGTTGAGCGAG  
TCGGGGCGCTTCTTCTCAGTTCGTTACGCGGGTGATATTTTTAGGGCGCGCGCGGCATTACCTTCAGCGGCATACTTAA  
CCGCCTCAAGCAAACCTTATTCTTCTGTCGCTGAATGTCTTTCATGTAGCTGGTCTGCATATCTGCTTAAATCAGCTGCTCAA  
AGGCTTACCGGCTTCTACCGCTTTCGTCTGTGACGTATCCCCAGGAATACCGCGCGAGCGTTATGCTTCTCGATCACCTCCAT  
CAGCTGTTTCATCTGTCGGGCGGGTATAACCCCGGCTTCATCAATGAATACGACTGATTTTTTATCCAGCTTTTTTATCCTTCGCT  
TTGAGGAAAGCGGCAACGGTGCGGGCCGTAATCCATCATCTTCAAGCGCTTTTTTCTGTGTCCCATAGGGGGCCAGCGCCG  
TGACCTTACGCCCTTGTGACTCCAGCAGCTCTTAGCGGCCATCGTCATATAGCTTTTACCGGTACCGGCGTAACCATGTGCGG  
CCACAAACCGATCTTTGCTCGTCACAATTTCTGTAACCGCGCGCATCTGCTCCTTCTGAGGTTTTCCCGGCAAGCAGCTGGC  
CTGCAATCTCTGCGGTGAGCTGTCGCGGCATCTGCCCGGCGCGGTGATTCGATAGTCAGAATGGAACGCTCAAGGCGAAT  
ACCCTCCACGGTAGTGACGCGGTGGCTGGTCTTTTTAAGCCTGCCGTTTTTAATACCATCATCTACCGCAAACGGGCTTTATC  
CGCACGCATCCCGCTATTTCGTGAGCGAGTCCACTCTTTCGCGGTGAGAGTTTTCGGCCATAACTGAAGCACCGACCTTCA  
GAGTTGATTGATACCGGGCTTCGCCCTCGATGATGGCGCCCTTCTGTACCGCCTCAGGTACGCTTTTTCAACATCGGCTATTG  
TGGCATGGCCCAGCACCTGCTTATTAGCGATTTGAATCAGCTTCTGGCGTTCAAAGCTGGCATCGCGCTCTGACAGCGACTTA  
ACTGCAAACCTGGATAGCCCGGTGAGCTTTAACCTCCGGGCTGGTAAAATCCGGGGCCATGTTGCGCGCTATATCAGCCTCCAG  
AGGTTTACCGTGTCCCTGCCATTACGGTTATCAAATCAATGCCGAGCGTTTTGGCGCGGCTGGCCCATTCTGGTGAATTTT  
TTCACGGGAATGCTCTGTTTTCTTTTACGCGTAGCCATCGAGACGCGGCTTTTCTGTCTGAGCATCGGCGGTTTTCCCGCGTCA  
GACCCATTGCAGCGAGTCCCTTTTTCAATTTGCTCCGACCGGCGGGAAAAGCGCGAATCTGTTTCATCTGAAAAATGGGCCATAT  
CGAACGTGTTATTTTTGCTGTTGTAACGCAGCTCATAACCGGCTTTGGTCAACTCCAACGCCAGCTCCTGTTTGTAAACATCGC  
CCAGGTGCATTTTGTACGCATCAGCTCATTTTTGAGCGCGCGCCACTGGCCGTCTCGCGCTGGGTCATGTTTCATGACA  
AAAGCGTGTGTGTGCAAATCAGGATCTAGCGCCCTGGAAGTTTCGTGGCGGAAAGTAGCGACGACAAGGTTATTGGTATTCT  
GGGTTACTGATTTCCCTGGCGAGTCCGCGGCTGCGCGAGTTTTTTCAGCTTACGCACAGCAGCGGCAACAGCTTTTTTC  
ATGAGCCTCGATAATGGTTTTATCGCCGTGTATCAGCGCCTGCATGGATACCCCTTATAGGCGCTGAAAACGTCAGGTCGTAGCC  
CAGACGCTCTTTTTTGGCATACCCACGTGTCGCTGCATATGCGTGAAGGTATCTATCTCTCCGACAAGCAGCTCTTTAAACCG  
GGCTGATTCAACGTCCCCGATAAGCCGAGGGCTTACGCTCCGTTCCCTGCCAGGACGTGAATGATGAATCCTTACTGTAGT  
AATCATCCTTTGCATCAGAGTAGTAGCCACAACGCTAGTGACGTTCTGGCGGGTAATCGTGGTTATATCAAGCATCAGATCTC  
CCTCAGTTCAATGCCAGGAACAGGGTTTTTTCGATGGTATTTAACGTGTTTAGCCTTGAACCTAGCGACGGGCATATCACCAG  
GCAACGCCAGATAGCCGGTGAGGTTTGGCAACATTGATATTTCCGGTAGGCGTTACGGCACGAACAACCTTTAACGTGCGCGG  
TTTACGGACAATCCAGGGCTTCTGAGGATCGGATTTTACGCTCAACTTCGCTTCTATCTCACCGAGTGAGCGCGACATTTG  
ATCCAACGTTTCATCACCGAGACGGCTGCCGCCAGCACGATGTTAGAACGCATGTTAGCCAGAATTGTCTGAGCCATATCCC  
GACCATAAACCTTAAACAGCTGAGAATAGGTTTGTAGCCAGCATAAACACACAGACCGCTTTTACGCCCTTTGGTCAAGTGA  
TCGTTGAGGTTTGGCAGAAACTGGAGTGATTCCAGCTCGTCAATAAATAATTAATGCGGCTTTCTTTTTACCCATACCCAGC  
ACGATAGAAAAAATCGAATCCAGCCAGCAGGAAATTAGCGGATTAAGTGACCTTTTTCATTTCTTCTGCCAGGTGATAAACAG  
GGTTCCCGGCTTTCCATCATCAAGCCAGTCACGCAGGGAAAAAATTACCTTCCGGCATTTTCAAATGTGGGGCAAGATTCTTAC  
TGAGAACAATCGCGCGCTTCCAACCTGCTTTTTTACAGACCCGGAAAAAATAGCTTCGGCAGGCGTCCCATTAATAAATCTTTT  
AATTTTTTCTGGTCAACGTTACAGGCCAGTGAATAACTTCTTCATAGTTACTGTGCTGTATAGGCTGTGAAGTTTTTTTCGAAA

CTTCACTAAAAATAAGACGGCCATAGCCGAACCATTCTTCAGTAGCCATATCAGGGCTTTCCTGAACAATAGAGTTCACTAAAC  
GCTCGTAATCATATGAACGGCGAATTTTCATTGAAAAACACCCAGCCTTCAGTGCGTTTATCATAGGCGTTTAAAATAACATCGC  
CGGGACGATAGAAATTTCTTAAGAACCCCCATTTGGATCTAAAGCAATATTTTTGCCGCCTCTAATGATGCTCTTAAAATAACAG  
TTCATTGAAAATTGTGGTTTTACCAGTACCGGTTGTACCGGCAATCGAAAAATGCAAGTTCTCAGCGTATGTAGGTATGGGGAT  
ATTAGCCACGGTTAACTGGTTGACACCTCTTTCGCGTGTTTTATCAGCGAGTGTTCTGGCGCGAACAAGCTCTGTACCACGATA  
AATCTTTTTGAATCTTTCGCCTTAAACACGCGTGATTTATCATAAATGATAAAAGCGATCAGACCGCCAACACCAATAAACCA  
GCCAGCAATTAAGCTGACCATAAAGGCCATAGCGAAAAAGTATTCTTAACCAGATACGGAATCAGGTATTTAGCCGTGGATG  
GATCAATACCGTAGGTAAATTTTGCAACTAGAAACCATACCATCACTGGAGGCAAAGTAATTGCAAATAAAAATGCTAAGCCTC  
TTTTCTATCGTCCATTTAGCGCTCTTTTTTGGTTCCAGACTTTGTAGCCGTTACGTTCAACCTCTGCTTTTGCCGCTTTGG  
TTTTGCCGGTTCTGCTATCGAGCGCAGGAGGATTAGCGTTTCAATAGCGAGTGATTCATGCAACATCATCTGTCTGCCGGTG  
GGAATTTTACGCCAGATAGCGTTTCGGTTATTGCCTTCAGCTCATCGCGCAGTGGGCCAAAATCCGCATCTGAAGCACGGTCA  
AAAAGATAATCCAGTTTTCGATTACGTGCTCAGCCGGTCGGCAACTATTTTCAACCCGGACTCCCGATCACCTGGGCCAGC  
TTCAATGCAGCGCCGAGATAATCTGACCGATTACCTCCTGAAACCAGGTCTATATAGGCCAAAAGTTCATCTGATACTTTTGC  
GGTATTATTGGCATTCACTCCTCACATTGTGCATTTCTTAAACAAAAAATTGGGATCTAACAAAGCTGAAATCTTAGTATTACCA  
AAGTAATAAAGCAAACCTCATTATAAAACAATGGGTTATTGGGTGTTTTTAATACCTAATTATTACCGAATATTGACGCTATTATT  
TTTTTATCTTTAAATCAGTACGATAGCGTGATTTATCGCGCTGCGTTAGGTGTATAGCAGGTATAGCAGGTTAAGGAAAAAAA  
ATCATCTTTTTTGGTAGGAGCGACCTCCGTAGGTTAAGGGTCATTTGGCTAAAAGCGTCCTATTCTTTGATGGTCATGCTTGC  
ATGACCATCTGAGCAACCAAAAACACTACAGATAAACTACAGAGAACTACAGATAAACTACAAAAACGATTTACCTTAGCGTT  
GTCAGACTACTAATAGACTACAAGGAAACTACAAAGAACTACAAAGAACTACAAAGAACTACAAATAGACTACTAAAACC  
GTGGCAGACTACTAATAGACTACAAGAAACTACAAATAAACTACAAAACCTGGATTGACCCCTTCTTACGAGTGTTGTAGAGT  
CATCTTCATAACAACGGAGGGGTTATGAATAAACCAGCAGATCTGAAACCCCGCAACTTATCGGCTGCTGTCAGATTGCGCCTA  
AATGAAATCGAGAACTGGCTGGACAGAGGGCTAACGCGGCATGAAATTGCTGAAATCCTCGACAGCGAATACAGCTTTTCG  
GTAACAGCCAAAGGGCTTGAGATGGCACTGTATAGAACGCGGCAAAACCGAAAAATGTATTGCACAATACACATGATAAGAG  
TAGCGCGAAGGGTGCAGCGGAAAGTGTATTGCACAATACACAACCGTCTGAGCCTGAAGCGCAGGAAAGTGAAAAAGCAG  
AGAGTCCCGGCATTATTGATAAAGAGTTCTTCAATAAAATCGGTGAGGATTTCAACCCTAAGAAGTTCAACAAAAAATTCTG  
AGGTGATTTATGAAAGTAGCGGTAATTAATTACAGTGGCAGTGTTGGTAAAACATTAATTTTCATCTTACCTGTTAGCCCCGCGC  
CTGACTGGTGCAAAGTTCTATGCGGTAGAGACTATCAACCAGTCTGCTTCCGATCTGGGTATTGAAAATGTGACCAGTTTTAA  
AGGTGACGACTTCTCACGTTTGATTGAGGATATTGTTTTGAAGATGCAGGCATTATTGATATTGGCGCGTCAAACGTTGAAG  
CGTTCCTGATGGCTATGTCTCGCTTTGACAGTGGCGCGAACGAATTTGATAAATATGTAATCCCGGTGACGCCGGATAATAAGG  
CGATTGATGAAAGCCTGAAAACGGCACACACGTTAAGTAAAGCGGGCGTGAGCAGCAAGAAAATTATCTTTGTTAAACCGTA  
TTAGTCCAGACAGTGAAGTAGAAGATGTGCTGGCGCCGGTGTGTTGAGTTTGTCAAAGAAACGAAGATTGGCAAATAAGCA  
AGAAGGCTGTTATTTATAACAGTGAGGTTTTCGAATATCTGGCGTTTACCCTATCTCATTGCAAGTATTGACCGCTGAAGATC  
CAGAAGAATTCAAATCCCGTGCAAAACAACAACCGATGCTGACGAGCGCAAAAAACTGGCACGCCGTTATACATACATGAA  
ACAGGCGATTCCGGTAAAAGCTAATCTCGATAAAGCATATGCGGCTTAAATGGGAGAATAAAATGGAAAAGCAGCCGGATAA  
ATTAGAAGTTCTGATGGACTGGTTTTTGGTGACGCGAAGGAAATCACCGCAACTCAGAAAGAAATGACGCAGAAACTTTCT  
GAGCTTTCGAAAAGCTGGCAAAGACACCGAAAAGTTTAGGAGAGACGGCAGACTCTTTTAAACGGGCTTTAGTAGAAAA  
CCAGCGTTCAATTAGCCTGGCAATTAGTGATGATGCTAAGGCGCGCGAGGAATTTCTAACTAAATCCGCCGCGCGCAGGCGT  
CCAGTGCTGAGACGTTTACCCGTCAGATCCTTTTTATTACAGCTGGCTGCACCATCGTGGGCGCCGAGTAGGCGCCGCGATA  
GCGATACTTTTACTGAGATAAAGCAAACCGGGCGTGTCGGTTTTTTTTGTCAAGCGGAGCGCGGAGGCCGAAGGCCGGAG  
GCATTAGTGGCCGCCGCCCGTAAGCGGGGCGAGACGGGAACCGGCTCGAAGCGCAGCACGGCAGAACGGCCCCGCGAG  
GGGCAATGCCGTTTTAATTCATCGTGACAGTCGCGCGTGACCATCACGGGGAGAAAAATAATGAATGACCGACAGCGAGAA  
CTGGCCGTATACGCCAGGCCCGCCGCGCGCGCTCAAGGAAGAAGGCACAAGCGTGACAGTACGCTAACAAAACAG  
GAAGAAGCAATGTTGCAGGAGCTGTGCCGGTTTCGCCGCTCTGGACGAACGCCTTATTCAACGAACGAATTTTTCCAGCTGC  
TGCTTATCCGCAACTGGCAGCAGTGGCAGGAGCAGAAGGCACAGCTGGGAAAATGCCAGGCTTTCGGGAAAGCTGAAAGCG  
GAGGGGGTGCAGGGTGAACGGAAAGGCGAAACCTTAACTGCTGGCTTCCGTCGAAGCCAATGAACTAAATTTGTAGTG  
TATTGTGCAATACACATTTACACAGAAACAAAACCACCGGCAATTCCTGGAACCGGATACTACGGCTATTCTGGGTGAAC

GGTACTTTTTGCACCTGGGTGCGCTGAAAAAGCTGAATATGCAGGGTGACGTTTCGCGTGCTGTTCTGCTTTGTAGACTGAATG  
CGCCAGCTATACGCCTGACTGCTTAAACCTGGTAAAGTTCTGCAACCGGCACTGACCGGAAAGCAAGGCAGGGAAGACCTA  
AGCCAGAAACCTTGACTGCTCCCGCCCTCAGGGCGGGGATTGCGGATCATGTTCTTCTTTTCAGGGATTCAACGCAGACA  
AGAAAGGCTTTCAATTTCTATACGTGAACGGCCGCGCAGCGGAAAGAAACAAGCCCGGTCAATCCGGGCTTGTTCCTTTAG  
GCGGCTCAGAAATCGCCTAAAGGCCCGGCTTGCCGGGCAGTCAGTGCTATTTAGTTTGTTCAGCAGCTGGCTTAATTTG  
CCGCCAGTGCATACGTGATTGAAAGCGCCTTGCAGGCGCTGATTAGGCAGCTGGTTGAACGCTTCGAGGCAGGCGCGCAG  
CAATAATCTTTCTGAGATTGACTTCTTTTTTCAGTTGGGAAGGGGTGGTAACTGTAGTCATGCTTGCTCCTTAGTGAGCCGA  
TATCGGCAATTTTTCGGGTGGCGGTGTTGCCTCCCGATGATTTAATTATCGGTGATTATGCTTTTAAAGTCAATACAGGTACGG  
AATTTATTTACCTGTTTTTATGCCCGTCAGGGCATGGAAGGCGACCGCGCCGGACTCCACCGGACACCGGCCGCAAATCGCC  
GGAAACTGCGGGACTGACCGGAGCAACAGGCCAACCCCCCTCCCTGCTAAGCCATAACCCAGCCCGCCACGCAGCTGC  
CGCACGTCCCCACGGGGTGCAGTGGGCGCCGCGCGCCTGCGCGCGGGTACGGCGGCCCGCCTGCGGGTTCGCGGGCGCC  
GTACTGCGAGTTAGCGGCCCGCGCGCGCCGTTACGGGGGACACCGCACAGTCACGGCCAGTGCCCCGCTGAGCTGCAC  
AATCCACGGATAACACAATAGCGCACTGGCAAAGGATGCCGACGCCTGAAGGGCGTGGGCACCCCGAAGGGGCGGGGCGG  
CCGCTTGCGGCCGGGCGAGTCCGGCGCAGGGTGTGGCCTGCCAAGCGGAGCGCGGAGGCCGAAGGCCGGAGGCGTTAGC  
GGCCGCTGCCCGCTAAGCGGGGCGAGACGGGAACCGGCTCGATGCGCAGCACAGCAGAGCGACCCCGAAGGGGTAACG  
CCCGGTGTGGCATCAGGATTTAGTGAATGGCAGAACATGAGCTGGAGAGATCACCGGCAAGCAGCAGCAAAGGGGCGGC  
ACAGCCGCCCGATGGCTGTTTGCAGTACCGGCGATTAATTAGAGCGGTGTTAATATCCCCGCTTGCGGGGGACTAGGTT  
TCAGCAAGTCATGTTAAATACGTGTCCATCATGTAAACTGAAATCCCCAATAAACAGATCCCGCGCATAGGCTACGATGTCAA  
ATATCGGGCTACGATTCCGGAATATCATTAGTAGACCGCTATCATTAGGTATTCTCTGCAAAGTTTCTTCGTCCTTAGCT  
TCGCCATATAGGCATCTCTAAACAGGTCGAAATCAGTGCTATTAACAGATCAACAAAGGCCACAAACGCCGCTTCGTTACCT  
TCCTCGCGGGCTTGTTTAAAGCCGTTAATAAAATCCCAGTTGATATGGCACTCTGACGCCATACCAGACGGAATACCTCCCAA  
TCTTGAAACATAAATTCTGGATCAGCCTCATTTGCGTGTAACTCGCGGCAGCGCTCGTAAACTCCTCTGAGCTATCAAATCG  
GTCAGATCGAGCCAGGCTCCCGCAATGCTTCCGCAAGTTGATTTATGGTAAGTGCCAACATAAACAGAAGGGGTGTAATATC  
AGTCATGGTGTACTCCTTAAAGCGCCGATACCGGCAATTTTTTCGGGCGGGCGGTATTGCCTCCCGATGATTTAATTATCGTTGAT  
TATGCTTTTAAAGTCAATACAGATACGGAATTTATTTACCTGTTTTTATGCCCGTCAGGGCATGGAAGGCGACCGCGCCGGACT  
CCACCGGACACCGGCCGCAAATCGCCGAAACTGCGGGACTGACCGGAGCAACAGGCCAACCCCCCTCCCTGCTAAGCCATA  
ACCCAGCCCGCCGCCACGCAGCTGCCGACGTCCCCACGGGGTGCAGTGGGCGCCGCGCGCCTGCGCGCGGGTACG  
GCGGCCCGCCTGCGGGTGCAGGCGCCGTACTGCGAGTTAGCGGCCCGCGCGCGCCGTTACGGGGGACACCGCACCGTC  
ACGGCCAGCGCCCCGCTGAGCTGCACAATCCACGGATAACACAATAGCGCACTGGCAAAGGATGCCGACGCCTGAAGGGCG  
TTGGCACCCCGAAGGGGCGGGGCGGCCGCTTGCGGCCGGGCGAGTCCGGCGCAGGTGTGGCCTGCCAAGCGGAGCGCG  
GAGGCCGAAGGCCGGAGGCGTTAGCGGCCGCTGCCCGGTAAGCGGGGCGAGACGGGAACCGGCTCGATGCGCAGCACA  
GCAGAGCGGCCCGAAGGGGTAACGCCCTGTGTGGCATCAGGATTTAGCACAATGTCAGAACATAAACTGGAGAGATCACC  
GGCAAGCAGCAGCAAAGGGGCGGCACAGCCGCGCCCGATGGCTGTTACTTGTCTTTGTGCGTAGCACTTTGATTAGGCCG  
GTTACGGCCGTAATCAGAGCGGCCAGCGAGGTGATGATTTGCGGTAGGTTTTTCGAGGATGGTAGAGGTCATATAGCACCTGT  
AGAGAAAGTTGGCGGGGTGTCGTTTTCCGACGGCCGCACTGTAACCGGGCGAATAAGGCAGGTTGTCAACAGCTTGAGCGAA  
GCGTCTGTTGACAACCTGCCGCGCCCGTTTTACTGCGGTCATAGGCGGAACGACCCACGCCAACGGAACGGCTTTATGACC  
GGGCGAGCTGAGATACCGGCGAACCTGGCTGGCGGCTGACGCCAGCCGCAAGCGCCAGCGCGGAGGGCAAAGCCCGGAG  
GCCAAGCGGAGCGCGGAGGCCGAAGGCCGGAGGCCGGAGGCGTTAGCGGCCGCTGCCCGGTAAGCGGGGCGAGACGG  
GAACCGGCTCGATGCGCAGCACAGCAGAGCGGCCCGAAGGGTAACGCCCGGAGTCTGCCGCTGTTTATCTCTCGTTCCATC  
TGAAATCGGCGGTAAGGCCATTAAAGGGTCAAGTTTATCAGGGAGGCGTTAGCCCCCATGTTGTTAATCATCAGGCAATATC  
GTCTTTGTAGCAGGCATAACCGAAGCTAAGCTCTGTTTTATATAGTGCGGGCAAAGTCCAGGCATCGTGCCGAAGTCCTC  
ATAATCTGCCAGGACGATTTCCGCGGGCTTTGTGCCATTGCTGTACGGAAGAAAGCGGCAGAACAGGGCAGGGGTGCGACCA  
GTCAGTGACGGTGTTCAGATCATATCTGCCAGACGCTCCAGGGAGCCGTAAACCAGCTCTGTGCGCAGATCCGCCACCATG  
CGTTGTTTACGCAGTGATGCCAGATAATCAATCTCTTTGGTTATATCAGAATTTAAGCGGGTCTGGTAATCCATGATGACTCCT  
TTGCGCGCCGATAACCGGCAATTTTGCGGGCGACGGTGTTCCTCCCGATGATTTAATTATCGGTGATTATGCCCTCAAAGTCAA  
TATAAGTACGGAATATGCATGCATAATTTATATCTTGCAAAGCGTTCATAGAGTGCTGAATCGCTTTCTGACAGCCTCAATAA

AAAAAGGCGGGGATTCCCGCCTTTTTCTTACAGCTGCTTACGTGGCTTTTTACGCGTCATATACAACGGTATCGCGCAGTCTA  
CCGCGTACAAAAAGCACGCCAGCGCGCCGCAACCGTACAGAAACGCAAGCGGCTTATTATCGAAGTAGCTGAAAACCCCTGT  
CGCCGCACACAGGCCAGAACAGAGACGCAGGCGCAGGTGATCTGCACCAGATCCCTGTATCCCGCACGAACGATAAACCA  
GGGCAGGGCAAGCGCAGCGGCGCTAATAATTAATGCGAGAGGGACAAAAACGAGATAGTGATACATGTGAACTCCTTGATG  
GTTGCCGATACCGGCGATTGTTCCGGGCGGCGGTATTGCCACCCGATGATTTAATTAGAGTTTTGCGCGTCCAGGAGATTGAC  
CTGAGCCGGGGTAACGTGAACTTTTCCCCTTATGGATCACGTTATGCGGGGCGCTAATTTATCACTGATAAAGCTAACCG  
GGTAACGTTTTTACCAGCAATCCGCTCGCTAAACCATGCCACTTTTCCGCTGGCCGATCCACTGGATGAACAATCACACCG  
GCCATGCTGCAACCCGTTGCGGGTTCGTCAGCGTAATGCTTACCAGGACTGTATCCCGGTAACCAACTTAAACCGGCGGCA  
CACCTGCCTGCGTAGCGGCTGCGACAACGCAAGCCCGATAACCGCTATCCGATTAATAAGCATTATTTCCCCTTACTCATGCT  
GATATCACCTTGCCAGCTGTTACCAGTTTACGAAATTCATTTTATGAATTTACGCCCATGCTCAAGCGTTGAATACACGTTGC  
CGATAAGCCAGTTACCAGCCGTTTTGTCTCGGTATACCACCATGCTTCTGTCAGAGTAAGCAGCGGTTCCGCTATCCTCGCCCT  
TCTCATAGATCCAGATTTTAGTGACGTCTTACCCTGTTTCCGTTGCTGCCCTGAATGGTAGGGTCAAAGGTATGTTCAATCTCTAT  
ATCGAAGTAACGCTGAAGGAAGTTAGTAAAGTGCATGACGACTCCTGTAAGCGCCGATAACCGCAATTTTTCGGGTGGCGGT  
GTCGCTCCCGATGATTTAATTATCGTTGATTATGCTTTAAAGTCAATACAGGTACGGAATTTATTTACCTGTTTTTATGCCCGT  
CAGGGCATGGAAGGCGACCGCGCCGACTCCACCGGACACCGGCCGCAATCGCCGAAACTGCGGGACTGACCGGAGC  
AACAGGCCAACCCCTCCCTGCTAAGCCATAACCCAGCCCGCCACGCAGCTGCCGCACGTCACCCACGGGGGTGCGCA  
GTGGGCGCCGCGCGCTGCGCGCGGGTACGGCGGCCCGCCTGCGGGTCCGCGGCGCCGACTGCGGAGTTAGCGGCCGCGC  
GCGGCCGTTACGGGGGACACCGCACCGTACGGCCAGCGCCCACTGAGCTGCAATCCACGATAATGCAGGAGACG  
AATCATGATAGGAGGCTGAAGGGGAAATGAGCGGCAGCAGGGGAAGGGTTGCCAAGCGGAGCGCGGAGGCCGCGAGGC  
CGGAGGCGTCAGTGGCAGCTGCCCGGTGAGCGGGGCGAGACGCGTAGCGGCTCGATGCGCAGCACAGCAGAACGGCCC  
CGGAGGGGTGACGTCCGGGGGTTGCTTTTTAAAGATTTTCGACCACATCAGTAAATCGTAGTGACACCATGAAGCAAAAGTA  
TCGTGCAGACCAGAATCAACAACAGTAACAGCAGACCTTTTTTCGACGTAATAAAACCGGCCCAAAGCGCCCGCAAGAAG  
CACACTCAACACGATTTCCGTTATACTAATCGTATTCATAATCTCTCACGTTTCCCTTTTTAGAACTCTGCCACACACAGATAAAA  
CCTTATAACAAGCTACAAAACCCGTTATTCAGACGCGGTAATGCCTAGTTTTTTTTGCCAGTATTTTCCAGATGACAAAGAAACCCT  
TATCCACTTCCCGGTTACAAGGTGAATGATTGTGGCTTCATGCCCTTTAACAGAGTGGGATATTAACCTCACGCTGAATGATATG  
CGTCTCTCCATCATTTCCCGTACGGCAATTAGGCCCTCTGTAGAACAGGGGTTGATACTACTAATGTTGGTGTGTTTTCGGT  
TTTGTTCAGCATCGCTGATCCTCAAATATCGTTTTGTGTTACGTCTGCCGCTTTGCGCTGGATAAGCGACTTAAAGAAATCCGA  
CGCCTTCAGAATATCGCTATCCTGGAAGTCCGGAAATGTCGCTTCTGTAGCTCCTGCGCCGTACCTGCCCGTATAACGGTTTT  
ATCGCGGATCATCGTTTCGTTAACGCCATCAGCCTGTTTTTTGCTGAAGGAGTGCCGGAAAATAATCGCGTATTGGCCGCCG  
TATCCTGATGAACAGAAGTATCCAGCGATGATTACCCTGTTTACGATAGTGGTGATAGATTTGCTGGCCGTAGCGCTCCTGAT  
CGGAATTACGGTAATCGAACATTAACAGTTCCAAAAGCATTAAACCGATCTGGCAATTGCCAGGCGGTAGGGTGTGAAAGTGC  
GCTAACATAGTTTTCCCTGAGCGTGACAGTCACGATAAGGCCGGGCTTTGCCCGCTGGTTATCAGTTAATCAATGGCAGATA  
AATACGATTCTGGCTTTCGTTCTCCAGCGTATTAACGTACTCCCGCAACAGGTGATACCGGTTAGCCATCGTTTCGTTGATTTCG  
GCTTTGCCCTTCTTCATATGCCAGGCCGCAAAAGTAACTGTAGGCATACAGACAAACAATAATCCCTACTTCCGCGCGCGCTGCAT  
TCACCTTCAAAATAGTTAGGTAACGAGAGCCAAAGAGGTTGGGGCGCTTCCATAAAAAACGCGCCATTGCTGGCCTGAAGGT  
ATTCCCAATACCCTCCCTGGTAGTCTTTAGCGTAACGATTCAGAAAGGACTGAATGAAGTGATCTGCGCTGAAGAAAGCGCCA  
CGAAATGCCGCAGGCATGAAGTTCATGCGGGCGTTTTTCAGAAATGTAGCGGGCGGTGATTTGATAGTTTCCATGATACTTCC  
TCTTAAAGCCGATACCGGCGATGGTTAAGCGGCAGGCACATCACCTGCCACTTTTTAATTATCGTACAATGGGGCGTTAAAGT  
CAATATAAGTACGGATTATTTACCTAATTTTATGCCCGTACAGCATGGAAGGCGACCTCGCCGGACTCCACCGGACACCGG  
GGGCAAATCGCCGAAACTGCGGGACTGACCGGAGCGACAGGCCACCCCTCCCTGCTAGCCCGCCGACGCGGCCGGT  
TACAGGGGACACTGAGAAAACAGAAAGCCAACAACACTATATATAGCGTTTCGTTGGCAGCTGAAGCAGCACTACATATAGT  
AGAGTACCTGTAACACTTGCCAACCTGACCATAACAGCGATACTGTATAAGTAAACAGTGATTTGGAAGATCGCTATGAAGGT  
CGATTTTTTGAAGCTCCGGCGCCAGCCGGGTACACAGCATCCCTTTTTATCTGCAAAGAATTTCTGCGGGGTTCCCCAGCC  
CGGCCAGGGCTATGAAAAGCAGGAGTTAAACCTGCATGAGTATTGTGTTTCGTCACCCTTCAGCAACTTACTTCTACGGGTT  
TCTGGCTCGTCAATGGAAGATGGCCGCATCCATGATGGTGACGACTGGTTGTGGATCGCTCGCTGACGGCCAGCCACGGCT  
CAATCGTAGTCGCCTGCATCCATAATGAATTTACCCTGAAGCGGCTACTGCTGAGGCCAGACCCTGCCTGATGCCGATGAAC

AAAGATTTTCTGTGTACTACATTGACCCGGATAATGAGAGCGTTGAAATCTGGGGAGTGGTTACGCATTCCCTTATCGAGCAT  
CCGGTATGTTTTCGCTGATTGATGTCAATGGCATGTACGCCAGCTGTGAGCAGGCATTTAGGCCAGATCTGGCAAACGAGCA  
GTGGCCGTTTTATCCAACAATGACGGCAACATTGTGGCCGTAATTACCTGGCGAAGAAAGCGGGCCTGAAAATGGGCGATC  
CGTACTTCAAAGTCAGACCCATAATCGAGCGTCATAACATCGCTATTTTTAGCTCTAATTACACTCTCTATGCCTCCATGTGCGCC  
CGTTTCGCGGCCGTAGTTGAGTCCCTTGCAAGCCACGTGCAACAGTATTCAATCGACGAGCTTTTTGTTGACTGCAAAGGGA  
TAACGGCCGCCATGAGCCTTGACGCTTTCGGGCGCCAACTGCGCGAGGAAGTCAGGCGACACACAACGCTGGTATGCGGG  
GTCGGTATTGCCCGTACTAAGACGCTGGCGAAGCTGTGTAACCACGCTGCAAAAACATGGCCCGCTACTGGCGGGGTGGTTG  
CTCTGGACGATGGCGCCAGACTGAAGAAATTAATGAGCATCCTGCCGTTGCGGAAGTCTGGGGCGTTCGGCCATCGTACAG  
AGAAAGCACTCGCCACAATGGGGATCAAAACGGTGTGGATTTAGCCAGGGCAGATACGCGCCTAATCCGTAAAACATTTCGG  
CGTTGTGCTTGAAAGAACGGTACGGGAGTTGCGCGGCGAGGCTTGCTTCAGCCTGGAAGAAAACCTCCTGCGAAGCAGC  
AGATTGTTGTGTCGCGCTCATTTCGGCCAACGCGTAGAAACCCTGACGGACATGCAGCAGGCTGTCACCGGATTTGCAGCGCG  
CGCAGCTGAAAACTGCGTAATGAGAGGCAATACTGCCGCGTCATAAGCGTCTTTATCCGTACCAGTCTTATTTCAGTGCCTG  
ATACACAGTATGCCAATCAGGCAACCGAAAACTGACGGTGGCAACCCAGGACAGCCGCACGATAATTCAGGCAGCACAAG  
CCGCGCTGGCGCGGATCTGGCGGGAAGATATTGCGTATGCAAAAGCAGGGGTCATGCTGGCAGATTTTAGCGGGAAGGAG  
GCCAGCTTGATTTATTCGACTCTGCTACGCCTTCAGCTGGCAGCGAGGCTTTAATGGCTGTTCTTGATGGTATAAACCGGCGT  
GGAAAGAGCCAGCTTTTTTTCAGGCCAGGGCATCGATAACTCCTTGGCATGCGTCGTCAGATGTTGTCACCTGATTACACG  
ACAGACTGGCGCTCAATACCAATAGCCACCATCAAATAATTACCGGCGCCGTACACGGGGCCGTTAACCTCAACCGGCCGAA  
ACAAGTTTCGGCACGTTTTTCGCGTTTTTCGGTAAAAGCCGTTTCTCTGTATAAAAGATCAGCTAAATTATGTGTATTGCACAA  
TACATATATGTGAGGTTAGCAGTGAATTTGCCTACGCCGAAACCTACGATGAACTTCAGAGAGCCTACGATTTTTTCAATGAG  
AAGCTATTCAGCAACGAGCTGCCGCCATGCCTGATAACGTTGCAGCGTGAGAAGCGAACGTATGGCTATTGTTCTTTAAGCG  
TTTCGTGCGCCGTGAGAGTGGGTACACGGTAGACGAGATCGCTATGAATCCGGTGTATTTCTCGATCAGAACCATAAAGGCCA  
CGTTTTCAACTGGTGCATGAGATGGTTCATCAGTGGCAATTCATTTTGGCGAGCCTGGCCCGCGTGGCTATCACAACAAA  
CAGTGGGCGGCCCGGATGGAACGGGTAGGACTAATGCCTTCTGATACCGGCGAACCGGGAGGCAGGAAAGTGGGCCAGA  
GCATGACCCATTATATTATTGCCGGTGGCCCTTTCGATATGGCCTGTGATGAACTGCTGACAGGCCATTTCCGGCTTTCCTGGAT  
GGACAGGTTTCCGCCTTACCAGCCTAAGCCTGGCGCTGTGCTAAGCCCTACAGGAAAAGGCTATATTGACGACGAGGAAGAT  
GATAGCGAACACGAACAGGAGGTGGAGGAAGGGCGCGACCCGGTTGAACTCGACGACGAGATCATAGAGGCCATGCGATT  
TGTAACCCACCGCCTGAAGCACCGGTGAACAAAACAACCGGGAAAAGTACAGCTGCCCGGTGTGTCATATCAATCTCTGG  
GGTAAACCGGGGATAGTGGTTTACTGTGGTGGCGAGCACTGTAATAAAGCCGCGTTAGTAGTCTTAAATAAAGTCTTTTCGG  
ACTTTATTTTTTCCATTTCCGAGTTCGTGATGTTATTAATGCTGTACTTCGCGGCTTCTTTTAAACAGTTTCAGCAAGGCTTGC  
TGATCCAGACCTGAACTAATTTAATGGTTCGCCGTTCTCGGCTTTAAGAGTGGTGTCTGGTACAAATCCAGATTTCGCTT  
AACGGTGTGGAAATGTTTTGCTTGAACGGCCTACTCGCATGGCTACGTCTGATGATTTCTCACCTTTGACAAGCACGGAAT  
AGCCAATATCTGTTGTGATGTGTGCAAAGGAAGCCATTTGCGGCAGCAGCTGTTTCCATTCTGTTTCTGAAATTCTGTTTTTCT  
GAGCCATCTGTGGCGCCTCCGTAGTTTTGGTTACAGAAAGGATATACTCAGAATAAACAGGGGTCAATACAAGTACGATTTTT  
ATAAACTTTATTTTATTTGAGGGTGAAGCCCGGTGCGGCAGCAGCGGGCCTCGATGGTGGCGCAAGGTGCTGGCGCCA  
TGCTCGGATTAACATGAACCGTGAAGAACTGCGAAACTGTTTTTCGCGGTTCTGAGGGTTGACCGAGCCGCGAAGCGG  
CGCTGGTAAGCGATGATATGCACATATCCACAGGCATATTTTAAAAGGTATTTTATAGATTTTTTATCTTTTTAAAGTCTTTTAG  
AGCTATATAACTCATTGATTTAAAATCATAAATAAGTGTATCTCTGGGAATCCGCCACCTTGTATGGGAATTGGCCACCTTA  
CTATGGGAAACAGCCACCTTACTATGGGAATTAGCCACCTTGTATG

>pQEB1\_Tn-IS5

GGAATTGGCCACCTTAGACGAACTGTAAAAAATGATTTACTTGTGTTGAACTTTGTGGTAGTGTGGAGAGTAATTTTTAACC  
CACAAGGCAAGGCGCATGGATAAGTTGCTGAACAAAAAGATAAAAGTTAAGCAGTCTAACGAGCTTACCGAAGCTGCTTAC

TACCTCTCGCTAAAAGCAAAGCGCGTTCTCTGGTTATGTCTTATGCAGACGTATTTACAGCTTCAGTAAGCGAAGATGATGAT  
GAGATGGCTGTACTCGGTGACTCTACTTTCAAAGTAAAGGTGGCTGACTATCAGCAAATTTTTACAGGTAAGCCGTAACCAGGC  
TATCAAGGATGTTAAAGAAGGCGTGTGAGTTAAGCCGTTCTGCGGTAATCTTTTACCCGAAAGAGGGGCGTTTTGACTGC  
GTCGCGCGCCCCTGGCTAACAGAGGCTGGCAGCCGATCAGCTCGTGGTATCTGGGAAATCGAATTTAACATAAACTCCTGC  
GGTACATTTACGGCCTGACGAACCAGTTCACCACCTACTCGCTCCGCGATTGTGGCAGTCTTCGAAATCCCCGGACGATCCGC  
CTTTATGAAAGTCTTGCTCAATTCAAATCTTCAGGCTTATGGGTTACTACTCATGCTTGGTTAAATGACCGTTTCCTTTTGCCGG  
AATCCCAACAGAAGAACTTGGCAGAGTTGAAACGATCTTTCCTTGATCCTGCACTCAAGCAGATAAATGAGAAAACACCTTTA  
CTTGCTAAGTATAGTATTGATGATTCAGGAAAATTTCTGTTCTCAATAATTGATAAGCAAAAATCCCGTCTGACATAAATCAGCAC  
ACATGAGCCTGTCAATTTGACAAATTTTTGTATGAAGATGGGCGAATTTCCACACAGCACCCGGCGCCCGCAAGATGGGCGG  
ATTCCACACGACAGCGGCGCCCGCAAGATGGGCGGATTTCCACACTACAGCGGCGCCCGCAAGATGGGCGGATTTCCA  
CACGGCAGCGGCGCCCGCAAGGTGGGCGGATTTCCACACGGCAGCGGCGCCCGCAAGGTGGGCGGATTCTCACGCGG  
CAGCGGCGCCCGCAAGATGGGCGGATTTCCACACGGCAGCGGCGCCCGCAAGGTGGGCGGATTCTCACGCGGCAGCG  
GCGCCCGCAAGGTGGGCGGATTCCACACGGCAGCGGCGCCCGCAAGGTGGGCGGATTCCACGCGGCAGCGGCGCC  
CGCAAGGTGGGCGGATTCCACGCGGCAGCGGCGCCCGTAAGGTGGGCGGATTTCCACACGGCTGCCGCGCCCGCAA  
GGTGGGCGGATTTCCACACGGCAGCGGCGCCCGCAAGGTGGGCGGATTCTCACGCGGCAGCGGCGCCCGCAAGATGG  
GCGGATTTCCACACGGCAGCGGCGCCCGCAAGGTGGGCGGATTCTCACGCGGCAGCGGCGCCCGCAAGATGGGCGGA  
TTTCCACACGGCAGCGGCGCCCGCAAGGTGGGCGGATTTCCACACGGCAGCCTCGCCCGCAAGGTGGGCGGATTCCCA  
CACGGCAGCCTCGCCCGCAAGGTGGGCGGATTCCACGCGGCAGCCTCGCCCGCAAGGTGGGCGGATTCCACACGGC  
ACCGGCGTGCGGCAAGGTGGGCGGATTCCACACGGCACCGGCGCGGGCAAGGTGGGCGGATTCCACACGGCACCGG  
CGCCCGCAAGGTGGGCGGATTCCACACGGCAGCGGCGCCCGCAAGGTGGGCGGATTCCACGCGGCAGCCTCGCCCG  
GCAAGGTGGGCGGATTCCACGCGGCAGCCTCGCCCGCAAGGTGGGCGGATTCCACACGGCAGCGGCGCCCGCAAGG  
TGGGCGGATTTCCACACGGCAGCGGCGCGGGGCCAGTGGGATTAGGAGAATAGGTGTTTTACCGAATGCCCTGACGAGG  
CGTAAAAAAACCGCTTGGCGGCGCCTCATAAAGCAGAAAACCCGCTCAAGGCGGGTTATCTGCTCTGTAGCCTGTGATGCT  
TCGCGGGCATCCGGCATAACAGCGAGGTGAAATCTTCTTTTGGCATGTTAATTATACGTCTAACGCGGCATATGATCAAACCTG  
TATTAATAAGCCACTGTACCGTTTATAATGCTCTCAGATCAAAGAGGTAAAGCCGTTTAGCCGCTGTGTGATGAGCCAGTT  
CAGACTCTTCAAATCGAATTTGGTACTAACAGGACCCGAACCGTGGGCAAGCACACGGCAACGGTATAGCCCTCTTCCGG  
TTTCGCACCCGGAAGCCTGGGCGGCAGCGTGGTGAAATCTTCTTTTGGTTAAGTGAATGGCATAACCGGATGGGCGGATTA  
GAGGAAAGGGGATTGCCTAGTAACCTACGCGCCACAGAGATGGAGGTGCGGGGAATGATTGAGCTGATTATCGCTATTCTGA  
CCTAATTGCGGCTGTATTGCAGTTGATCAACTGGTTCCTTAATGGTGCCGAGTCTGTGAAGGTGAAAGCCTGAACGGGC  
AAAACCTGAAAGTTTATAGCCGTCCTTCGGGGCGGCTTTTTTTTCGGCAAATAGGGTTTTACCGAATAATGCAGAGTTTTAA  
GGTGAGAATTTGCAGACTTGGCGTTTTACCGAACATAGATACTCCCTAGGCTGATAGGTGCATTAGTTATCACCTACCTGAAC  
ATATTGTAAAAGATGTCAGTCTCCAGTGACTTGTGTACTATCAACTGACAAGACTCTTACACGCAACGCAGGGGGATGGAGTT  
TTATGCTTAGAAAAATAATCAGGGGTAGCGGATTAAGTCAAGTCAAGAAAAACTGATAGAGTTCGCTGATGATGCTTTTTTT  
GGTCTTTGGTCTTATCCTAATGTTTATAGCGATGAGGGTACTCTAAAAATAAAATTGGGAAAGAAGTTAGTGACTTATTAGTTA  
TTTTTGATAAAGATATAATAATTTTTTCCGATAAAGCTATTACATACAATAAAAACAAAGATCCTAAGGTTGCATGGCAGAGATG  
GTTTAAAAAATCAGTCATACAGTCTTGACACAGTTATTTGGCGCAGAGAAGTTTATAAAGATCATCCCGAAAGACTTTTTGT  
TGACAAAGAATGCTCAGTTAACCTCCCATTAATAAATAGATAATTCTTTAATTTTCATTTGGTGGCCGTCCTAATAATATTTAG  
ATCCGGCGATCTCGTACTTTGACAAAATAGAAAAGGCAGCTCTGCTACTTTAGTTAACATATTTCTTTAAACGCCCATCAATG  
TCTAGAAAATCCATTTTGTGTCGGAGACGTTTATCCTGATAAGACTTTTGTCCATATACTTTGATGAGACTGCCCTAAAACCTACTG  
TTAACCGAGTTAAACACAGCAACTGATTTTATTGGCTACCTAACGAAAAGAGAGGGTGTGAAGAGAAAGAACATTATTGG  
TCAGCGCTGGGGAAGAAGAGACTCTTGCTGCTTACATTATGGGTGATAAAACCATAATATCAAAGAAATTTATTGAAACGAT  
CAAGGGATGACCATACCGGAAGGTGAATGGAAAAACTATAAAACCACTTTCAATTATCAATATCAGCTCTCAATGAAAAAGGG  
TAGCGTTTTCTGGGATAACCTAATCCACAACCTCTCGACAAGTATATTGTCAGCTAACGTTGGTTTTTTTAGTGAAATTTGAATTT  
TCTACACATGAATTAGGTGTTAGAGAATTAGCCAAAGAAAGTAGGCAATCTAGATATTACCTTTCAAAGAACTTTAAAGAGAA  
ATTA AAAACAACCTCAGCCTCATCTAAGAACGTCAAGAATGGTCGAATCAATCGATGAGCCTGGAAAGTTTTACTTATCCTTTT  
TTTTCTAACGATAGCAAGTTGAGTTACTCTGATTACAGAATCAACGTATATCTTATATAAATGCTTATGCTGAGGTTGCCTTTA



ATAAATACAGACATATTAATAAATAATTACTATTGCAACAGAGCCGCAAATAACAGAAGGAAGATCTGAAGACCTAATATATA  
GCATATCCCCAGAGAAATTTACCAAAGAGCAAATGAAAAAGCCAAAAGATTATCAAGAGAATACAAAATACTAAGTGATTTT  
TTACCTACTAAAACGACAAAGAGCGATAACTTTAAATCAGTTATATCAAAGGTGAAAAAATAGGGCGGAATACACCTTGTCC  
ATGTGGCTCCGGTGTTAAATTTAAAAAGTGCCATGGTGCGAATAATTAGCATTATTGTATGTATAACGGTAATGGCGCGGCAGA  
GAAACCGGCGCGTTCTGCCCTAGTGTGGCCTGCGGGTTCCCCGACCCGCTGTATGTAGTATCGGCAGCATCTGAGAAAA  
CCACTACATGTAGTTATCAGCGCCACAACGGCGCGGGGACGAGTGCGGTTCGGAAAAATTGGGGTTTTACCGAATCCGGCA  
AAAGATTGCTTCTATAACGTCCGCTTCTGGCACACAGCAGCCGTTAAGATGTAAGGCCTTACGCCAACTAAATCTAATGGGA  
CAGATTTAGTTGGTGATGGTCAAGTAATCTGCAAACGGTCACCAAGTAAAATGCAAATGGGTAGTCAAGTCCGATGCAATTAC  
GCACCCGGCAAGGTGGGCCGATTCCACACGACAGCAGCGCCCGCAAGGTGGGCGGATTTCCACACGGCAGCGGGCCCC  
GGCAAGGTGGGCCTATTCCACACGGCAGCGGGCGCCCGCAAGGAGGGCCGATTCCACACAGCACCGGCGCGCGGCAA  
GGTGGGCCGATTCCACACGACAGCAGCGCCCGCAAGGTGGGCGGATTTCCACACAGCACCGGCGCCCGGCAAGGTGG  
GCCGATTCCACACGGCAGCGGGCGCCCGCAAGGTGGGCCGATTCCACACGGCAGCGGGCGCCCGCAAGATGGGCGGAT  
TTCCACACAGCACCGGCGCCCGCAAGGTGGGCCGATTCCACACGGCAGCGGGCGCCCGGCAAGGTGGGCGGATTTCCAC  
ACGGCAGCGGGCGCCCGCAAGATGGGCGGATTCCACACGGCAGCGGGCGCCCGCAAGATGGGCGGATTTCCACACGGCA  
GCGGGCGCCCGCAAGATGGGCGGATTTCCACACGGCAGCGGGCGCCCGCAAGATGGGCGGATTTCCACACGGCAGCGGC  
GCCCGCAAGGTGGGCCGATTCCACACGACAGCGGGCGCCCGCAAGGTGGGCCGATTCCACACGACAGCGGGCGCCCG  
CAAGATGGGCGGATTTCCATATCGACATGTATGTAGCTTGTGTTATCCGTGGATTGTGCAGCTCAGCGGGTTCGTTGTCGTATG  
GCGTAGTGTCCCCGTAACCGGCCGCGTGCGGCCGCTAACGCGCAGTACGGCGCCGCGACCCGAAGGCGGGCCCGCTTCC  
CGCGCGCAGGCGCGGGCGCCACTGCGCACCCCCGTGGGGGACGTGCGGCAGCTGTGTGGCGGTGAGCGGGATTAGGG  
CTTTGCAGGGAGGGGGCTGGGTGCGGGGATACTTCAGCATTGCGGTTTCCGGCGATTGCGGCCGGTGCCTTTAACTC  
CGGCGTGGTTCGCTTCCATGCCCTGACGGCATAAGAAAATAAAACCGCCATGCTGCGGTCATTCATGATTTTGTGGTGTAGCG  
ATAAATAGTCATGCGAGAAACGTTGAAGCGCTTAGCAACTGCACCAACTGTCATTTAGGATCAGCAAGTAAGATTCTAATTT  
GTTTAACATCTTCTCAGAAAGTGACGGTTTTCTCCCTCCACACGGCCCTTGCGCGTGCAGCTGCAAGGCCTGAGCGCGTT  
CTTTCAATATTGCGGTTGCGTTCAAAGCTAGAGAATATCGCCATCAGATGAGTATAGATTTCCCCTATAACTGGCGCATTGTGT  
CTATTCTGTCCTTGATGGCTATGAAAGTTATTCCGCGTTTCTCAGGTCGTCGAGTAAAGTAATGACTTGACCCAATGAACCAC  
CGAGCCGATCTAGTGCCAACTACTAGGGTATCTCCCTCGCGCAATGCTTTCAGGCAGTTCTCCAGTTCCAGCGCACCTTTTT  
TGTCGCGCTTTGGGCCGCTACGTGAGGTCTGATCCTGATAGATTTGCTCACATCCAGCTTTTGTAGTTGTCACCACTGGTGCG  
CCACATCTGAAGATGCGTAGATTTACGTGCATAGCCGATTTTCACTTTTTCTCGTAATTAGTTATGGGGTTATTGTTATGTTG  
ATACAGTAACGAGTTTTGTTACATGAGGGGAGTCATTTTTCGGGAGAAGTCAGGACTTTTCAAGACTGTCACAAAAACCATC  
GTTTTTGATACATTAATTTAACCAATAGGTTGCAGATCAAATCGTCTGTAACAGCCTTTCTGGCTGTTGTATATAATCATGAAAA  
AATGGTGAAGTAGAGTTTCAGGGTAACAGGGGATGCTTATGTCGTTTTCCACAACCTGGCTACTTGAGATCGCATGTGAGAATT  
ACTTCGTCTACATCAAACGCCTTTCCGCCAACGATAACGGCGCAACAGGTGGTACCAGGTAGGGCTTTATATCCCTCAGGT  
ATCGTTGAAAAACTCTTTCCGTCTATCAACCATACCCGTGAACTGAACCCTTCGTTTTTCTCACCGCACATGTGTATCGCATG  
ATTGCCCTGACAGCGAAGCCCGGCAATTTATTATAACAGCCGTCATTTGGTAAAACCCGGAATGAAAAAAGGATTACCCGC  
TGGGGTAGAGGCAGCCACTTCAAGTCTGAAAATACAGGGGCTCTGACGCTCCTGGCTTTCAAGCTTGATGAGCAAGGG  
GGGGACTGTAAGGAAGTAAATATTTGGGTATGCGCCAGCACTGATGAAGAGGACGTCATTGAGACCGCTATTGGTGAAGTTA  
TACCCGGAGCGCTTATATCCGGCCCCGACAGATTCTAGGCGGACTATCTCTACAGCAAGCGCCAGTAAATCATAAATATA  
TTCTACCTGAAGACTGGCACCTGCGCTTTCCGTGCGGAAGTGAATTTATCAGTATGCAGCCAGCCATTATGTGAAAAATTCCC  
TTGATCCGGATGAGCAACTTCTGACCGCCGGCGCGTGGAGTACGACATATTTCTATTGGTTGAGGAACTGCATGTTCTGGAT  
ATCATCCGGAAGGATTTGGCTCTGTGGATGAATTTATTGCGCTGGCCAATTCTGTCAGCAATCGCCGTAATCCAGAGCCGG  
GAAGTCTCTGGAAGTGCACCTGGAGCATCTATTATTGAGCACGGCCTGCGACACTTTGCGACGCAGGCCATCACAGAAGGT  
AATAAAAAACCCGATTTCTTTTCCCTTCCGCAGGGGCTTACCACGATACTGAGTTTCCCGTAGAAAATCTGCGCATGCTGGCA  
GTCAAGACTACCTGTAAGGATCGCTGGCGTCAGATACTGAATGAGGCCGATAAAATTCATCAGGTGCATCTGTTTACTCTCA  
AGAGGGAGTTTTCTCTGGCTCAATATCGGGAGATGCGGGAGTCGGGTGTCAGATTGGTCGTGCCATCATCGCTGCACAAAAA  
TACCCGGAGGCGGTGAGAGCTGAGCTAATGACGCTAGGTGCGTTTATTGCTGAGCTGACAGGGCTTTACGCAGATATTCCAT  
AGATTATCTCCCGCATAAATACCGGGAGGAGCGATCAGATTGTTCAACCTTGCACGAATCGGCATTAACCGCTTTCAGGAT

ATAAGGTTCAAGCAGTTTGGCTACGGCTTCAAACACGGGCACCACTACGGAGTTACCGAACTGCCTGTACGACTGAGTGTCT  
GACACAGGAATGCGAAAAGGCCTGCCATCTACTTTTTCAAACCCATAAGGCGCGCGCACTCTCGTGGAGTCAGCCTGCGGG  
GCCGATGCGCCTGATTTTCTTCGTTTCGCGAAGTCTGTTTCACCTGTGGCCATATCCAGCCACGGTCTATCAGAATTCAGACC  
CGTCTTTGTGATAGCGAGCAGAAAGCGTACGGGCAATGCTTTCTTTATTTTCAGGATTAACGAGGCCAAAACCGAATCCGTTA  
CCCTTAGCTGCGTGCTTTTTGGCGTAGTTATAGAGATACTCCAGAGTTTCGGCGTCAGTATATATTTGCTGTCAACCACGGGT  
TCCAGCAGTTCGCCAAATGACGGACGCTGTTCCGGATAAAAACGACTAATATCGCGCAGGGTAAAGCCCTGGTGAATGTTCA  
GATCACGACGGAACCGACCAAACGATACGTTCTCGGTGCTGAGGTA AAAAGTCTTTCCGTGATAACTTTAGGATCGTTT  
TTGCCATCTCAGCTGCATCCGCAACTTCATAGCCCAGTTCGTGAGGGTATCCATGATGACTTTAAAGGTTTTACCCTTGTCT  
GGCTCTTCAGGTTTTTAACGTTTTCAAGAACAAGATGGCAGTTTTTTTTGCGCGTATAATACGCGCCACATCGAAGAAAAGC  
GTTCCCTGAGCCTCACATTCGAAACCATGCGCGCGCCGAGCGAGTTTTTCTTGCTTACGCCCAGGCTGAACGTTGAC  
AGGGGAAACCTGCTAGAAGTACATCATGATCCGGCACATGCTCATTAATGTAAGCATAGGCATCGTTTTCAGGTA CTTCAGGTT  
TACTACTGAGCGTGACTTCCCGAATATCGAGATTGAAAGTGTGTTCTGAGCATCGTTAAACCAGTTAGCTTTATATGTGCGCA  
CAGCCTCTTTATTCCATTCACTGGTAAAAACGCACTGGCCACCGATGGTTTTCGAAGCCCTTCCGTATACCTCCAATCCCAGCAA  
ACAGGTCAATAAACCGGAAGGCATAGTCAGGGTGATGTGCAGGCGCTTCCGGAAGCATTTTTCGTAGAAGTTCCTCTTCGGC  
TAACGTCAGCGTCTTAGGTGAGCACTTACCATTAATCCAGCGATTAAGAGTCTCGGACTCCACTCATTTTTACCAACTTTTCTA  
AGCAGTTCAGCCACGTA CTCTGGTCATAGATTTCCAGCACCTGCCGAGCAGTTTTTATAATTTCTGTGCGAGTTGTTCTT  
CCGCTTCTGCTTTCTCAAGCAGATCCTGCGCCAGTAATCAAATTCAGACATATTGCCTCCATTGGGTCTTATGGGTGAAACTG  
TACTACTCATTTGACCCAGATTGAATGTTTTATCTGGATATTTAAACAGGTTTATTGTTAGGTAACGCACGTTGGCCACGCTGG  
AGCGTCTTCTGGGCCTGCTGTGCGCCTTTGAGGTCGTGGTATGGATGACGGATGGCTGGCCGCTGTATGAATCCCGCCTGAA  
GGGAAAGCTGCACGTTATCAGCAAGCGTTACTCAGCGCATTGAGCGACATAACCTGAATCTGAGACAACATCTGGCAAGG  
CTGGGACGGAAGTCACTGTGTTCTCAAATCGGTGGAGCTGCATGACAAGGTCATCGGGCATTATCTGAACATAAAACACTA  
TCAGTAAGTTGGAGTCATTACCGTTCTCTTTGTCTTTTAGTGATTCTATAAACCTCATTACGTCTGAATATAAAAATCTATTATT  
GATTTATGTGGCTCATGAGGTTGTGGGATGGTCTTGTTTTTGAATGTGCCAGTTTTCTTAATGGCAAAGATTAATTCACCTTCT  
GTTATTCTAACATTTTCAGCAAATGTTTTGCTTCTATAGTTACTGACTTCATTTAATTA ACTCTCATGGTATCGATTTTCTTTACC  
GGCATCTTTAACAAATGGTGCTCGTTTCTAGTGTTGCTGCGGTACGCTTCATCATCGTCTGCGGGGCGGTTGCGATAGTGAAGG  
AGCTGCCGGGCGTGAGCAAATCTATCAGGCGCTGGCCGCTGATAATCTCCATCCGTTCACTGGCAATACTGACAGATTTTGAA  
CCTGCGCCGTTTTCCCGGTATGGCAAACAGACCCGCGACAGTTATGACGTTTAAAGCAACTTCTCGAACTCCTGTACGTGCTG  
TAAAGCAATATGGCCGCGATAGCGTTTAGCCTGAATAAGATAGCGATATTTTCTATTATTACCTGGCCGTCATGCCTCCATCG  
CCGGTATAGCGTTTGTCTGATGGTCTGAAGCCATGCGCGGCTTTGTTGAATAAATCGAACTTTTGTGAGTTGAAGGATC  
AGATCACGCATCTTCCCGACAACGCAGACCGTTCGGTGGCAAAGCAAAGTTCAAATCACC AACTGGCCCACCTACAATAA  
AGCCCTCATCAACCGTGCTCCATAACTTTCTGGCTGGATGATGAAGCTATTCAGGCCTGGTATGAGTCGGCAACGCCTTCATC  
ACGGGGAAGACCTCAGCGCTATTCTGATCTCGCCATCACCACCGTCTGGTCATTAAACGCGTGTTTCAGGCTGACCCTGCGGG  
CTGCACAGGGTTTTATTGATTCCATTTTTACTGATGAATGTTCCGTTGCGCTGCCCGATTACACCAGTGTGAGCAAGCGCG  
CAAAGTCGGTTAATGTGAGTTTCAAACGTTTACCCGGGGTGA AATCGCGCATCTGGTGATTGATTCCACCGGGCTGAAGGT  
CTTTGGTGAAGGCGAATGGAAAGTCAAAAAACACGGCAAAGAACCCGTCGTATATGGCGAAAGTTGCATCTGGCCGTTGA  
CAGCAACACACATGAAATCATCTGTGCAGACCTGTGCTGAACAATGTGACGGACTCAGAAGCCTTCCCGGGTCTTATCCGGC  
AGACTCACAGAAAAATCAGGGCAGCATCGGCAGACGGCGCTTACGACACCCGGCTCTGTACGATGAACTGCGGCGTAAGA  
AAATCAGCGCGCTTATCCCGCCCCGAAAAGGCGCGGGTTACTGGCCCGGTGAATATGCAGACCGTAACCGTGCTGTTGCGAA  
TCAGCGGCTGACCGGGAGTAATGCGCGGTGGAAATGGACAACAGATTATAACCGTCGCTCGATAGCGGAAACGGCGATGTA  
CCGGGTAAAACAGCTGTTTCGGAGTTCACTGACACTGCGTGACTACGATGGTCAGGTTGCAGAGGCTATGGCCCTGGTACG  
AGCGCTGAACAAAATGACGAAAGCAGGTATGCCTGAAAGCGTGCGTATTGCCTGAAAACACAACCCGCTACGGGGGAGACT  
TACCCGAAATCTGATTTATTCAACAAAGCCGCATGCGCTTCAAATCCTTCCAGCAACAGTTCTTCAAACACAAAAGGATCAAT  
TTTTCTCAGGTAGTTAATTTTTGTGGGAAGCCCGGCAACGTCTTTATGCGCTCCAGCACCCGCGCGCACTTTGCTGCTTCT  
TTTGTGTCGTCGGTTGCGTACTGAACGCCGGAAGAATACAACGGCAAACAGTGCGATGGCGCTGCAAGCCCATAGAATAAGG  
TTTTCTGTAGTGGGGAAGGGGAACATGGTGATAGTGTGCTTTCTGTGGGTAAAGAAAAGGGCGGTTAAACCGCCCTGGTGT  
TTAGCGACGGCTGTAAACCTGCCACGAAGCGCTGCCTGACTGATTTTGGCAAATCCGCCCCGTAAAGTACGGTGCCGGTTCGAG

TAGCGGGCGCCATTAGATAGCAATAGCCGCTGGATTGCAGCAGTTCGTTGCGCAGCTTTTCTTCTGCTTTGATAGCCGGGA  
CTCCGCAGACTGCAAACGAACGGATAATTCGTTAATCTGGCGTTGCTGGTTATTCATCTGGCTCTGCATCGCATTACCTTTATCT  
TGGCTGACGCAACCGTTAAGAGAGCTGTACAGGCTAATGCACTTAATATAATTTTTTTCACGTTGGCTCCTTAAATTGAGATT  
ATTCCTAGCCCGCTATAAGCGAACTTTCCCGTATTTACTTATGATCTGGCTTATCATCGACTGGTTACTTCCACCTTCGCCATTAT  
CCGGGCATTATTAAAGAAAAGCCTTCTGGCATCCCTCGTGTGGTTGGGTAAAAAGCCGTGCTTGTCTTTTTTAACGATATTGA  
AGAAAGCAGCTTCAGCACTGTTACACTCGCTTCCGCCGCTATCGCCGGTGAGCTTGCCCGCCATGCACATAATAACTTTGCAG  
GGATCTTCAGCATGGCTGGCAGGAAGATAAAGCAGACTACCAGCTGCTATCAGAGGGATTAAGAGTTTCTTCATTGTTTTGTC  
CTAACAGTTTTGTTTACAGATATACACCCGCCAGAATGTTGATAACGGTAAGTAATATTAATAATAACGCAGAGTTATAAATAGATTT  
GTAACCTATATCGCCTGCGATATATTCGACAATAAAAACGAAAATCGTTAACATTGCGAACAACCTAATAACTTTCTGTAATTT  
TCTAACGATATAAGCAACTGAATAAGAGCCGGATTTGATGATGCTGGCGAGTAACCTGATAGCATGGACTCGGAATTTTCTTA  
AATGGGCGGAATGGAAAATGCCTTTTTCTTCTTCTGCCTTTTTGCTTTTCCGCAAAATCAATAACATCGCCCATTTTTTACT  
CTCCGGTTATATCTTTAGATCATCAAGTGATAAACCCTATCAAGCAGCTCTTTGAGCCATGTTGGTGGCGGCCAGTCCCGGA  
CCAGGTATTTTCTGCGTTCTGGGGTTCGCGGTATTTACTTGTCTATGTTCTCTGGGGTGGCAACGCCCTGCATTTTCATGGC  
TTCCAGGCTAATGCCAGCGTCCAATTTTGCAGTTAGCCAGGCCGGCGCTTCCCTATACCAGTCCACGTATTAAGGGTTATC  
CGGGTCACGATACATGGTTTACCTTTGGGGCGTTTTTCTGATTTACAGGGGAACCAGCATTACCTTCTTCTTCAGAGGTTT  
TCTTTTCGTTTCTTCTTGACACGATCTCATTAGCCCTATCATAAACATAAGTCGTCGAAATTACAATTACGCGGTGAAACGTAA  
ATGAGTAAACATCCAAAACCTTCTGTTTCTCGCTCTGGCCTGCCTTGCTTGTGCTGGCCGTGCCAGTGCTGCGCCTGCCTCAGA  
TGAAGTTGCCAGGCTTGCAGAGATGTGCGCCTGATGTTTACCCTTAACAATGGCGTACATCGTCGGCCATGAGTCCCTCAA  
ATGGGCCGTACAGGATCAATATTAACGGTGGTAGTACCCAGTTAAAACAGCAACCACGTACTGAAGCTGAGGCCGTACAGCGT  
TTCGAAAGTTCTGCTGAAGGATAATAAAGTTTTGATATGGGCCTTGCACAAATTAACCTCAATAATTTAGTGGGCCTGGGTCT  
TTCGGTTGACGATATTTTCAAGCCCTGCATCAACCTGCGGGCGAGCCAGACCATCCTTAAAGCCTGTTATGATAGCGCCCTGA  
AATCCTATCCAGCCGGGCAGGTTGCGCTGAGACACGCGTTTTCTGCTACAACACCGGCTCACTCATAACGGGATTTCTAAC  
GGGTATGTCACGAAAGTTATCAACGTGGCGCGTCAATCAACTGATTTGAAAATCCCTACGCTGCTACCTGATGGCCAGACCAG  
TGAGGACAGCACCGGACTGAGCCTCAGCAGGCAAAAAGTACGGCCACGCAGTATGACGGTGAACAAGATGTTTTTGGTTC  
GGGTGATGGCGATGCCTTCAGCCGAAATAATACGGATGCCTTTTTAACCAACAGGAAACAGCGAAGGGGGAGTGAGGTTA  
TGGATGGAACGTTTGTACCTTGTATTGCAATCACAGATCCTGGAGCTATTTGAAACAGGAAAAGTGAAGGAGGTAACGATAA  
AACGGGTTTTATTAAAGACGTGGTATCCCGTTTTTTCAGATAGACGATGAACAGTTGGGCCAGATCGCATGTTCCATTCCGGGT  
AACAAAGAGCATGAACTACGAACCTGGGCTGATTTAAGGCTACTGGCAGAGTTTTTGAAGATAAGTGTGGCGTTGAAGAAT  
GCCGGTTAAATCTGCAATCAACAGAAGATAGTGAGTAAGGAGAAAGTATGACCACGTTGTTTAAAGAAGTATGGCCCTGCGGT  
AGTTATGGGCGTTTTTGTCCATTGCCCTGCCGCAAATGCGCTGGCCGCTGGCACCGATACTGGTGAATCAACCGCTACATCAA  
TCCAGACGTGGTTGAGCACATGGATTCCAATTGGTTGTGCTATTGCGATCATGGTTAGTTGCTTTATGTGGATGCTTCACGTAA  
TCCAGCCAGCTTTATCCTCGTATCGTAATCTCGCTGATTGGTATTGGTTCTGCATCATTTCTGGTTTCCCTGACGGGCGTAGG  
AAGCTGAACAACGCGAAAAGGGGGGACTTTTTGTCCCCAAAGTGAGGACTACAAAGATGTTGTTGACGGGAAAAGACC  
GCTTTTCAAAGGTGCGACTCGCTTACCTCGCGCGCTGGGTGTACCACGTAATGTAGCTATGATGATATTCATGATTTCTGCCTC  
GCTTTTTATGATTATTCATATGTGGGCGATCCTGGTGTTCGTCTTTTTGTGGATTCCCTTCAGCTGCATTAACAAAATATGACGACC  
GCATGTTTTCGAATTATGGGCCTGTGGTTGAAAACCAAATTCAGTAATTGGTTTATTCTCCGTTTAAAGCAGTGGGGAGGATCG  
TCTTATCCTCTGTTGACTACAAACGTAAGGGTTTTAAAATAATGAGAGCTGCCACCGCTACGAAGCCAAAAAATTGATGCCT  
ACCGTAAGGAGCCATCAGTAAATAAAAAGTATTTGCCCTATTCTTATCACCTCAATGATTACGTGATTTTCGATGGAAAACGGCG  
ATCTGATGGCTTTTTTCAAGCTGGATCGCCGCACACATGACTGCGCATCAGATCGGGAACCTGGTACCTGGCATAAAGACCTT  
AATACGCTGGTCAAGAGCTTCGGAACAGACCATGTAGAGCTGTGGACGCATGAATATCACCATGAGGCTAAAGAGTACCCGG  
ATGGTGAGTATGACCATTTTTTCCCTGCTTATGTTGATCAATATAACCGTAAGCTGCACGGTGATTCCAAGCAGCTGATTAATGA  
CCTTTATCTGACCGTTATTTACAAACAGGTAGGGGATAAAAACACAGAAGTTTTCTGGCGAAATTTGAAAAGCCGACTCGTGACG  
AAATTCAGCGAATGCAGAATGAGGCGCTTGAAGGTCTGGAAGATATTTCTGAACAAATCCTGGAAGCAATGAAGCCGTATGG  
CATTACGAGTTGGGTATCTATTATCGTGACAAACGCGGTGTTGAAATTCCTGCGCCTGATAAAAAAGAACGTGAAGAACTTG  
CTGAAGTCGATGAATCAGACATTTTTGACGAAGCCATTGTTATCGAACGCAACGAGCCTGAACCTTCGCAGGCTCACGCTTAT  
TCAAAGCGCTGGAGTTCCTTATTTCTCGCAAATATGGAATGGGCCATCGTGCTGTTTGGCGTATCGTATCCGTGAGTAC

ATCATGGACAACCGCCCTGTTAGCTCACTGTGGGGGGATGTTGTCCAGATCAGAACGGTAGATCACAACCTTCTATACCACCGG  
CATTGAATTTCTGTAATACGAAGAAGATACAGAGCCAGGCCAGCTTAACATGCTTAAAGAAGCCGATTTTGAATACCTTCTGA  
CGCAGAGTTTTTCTTGCCTCTCTGAATCTTCAGCTAAAACGTTTCTGACGCATCAGGAAAAATCTTTCAGGAAACGCGCGAC  
CGTGCGCAAAGCCAGCTGGCACAGCTTGGTACCGCGCTCGATATGCTGACGTCCAGAGAGTTCGTGATGGGCTACCATCATG  
GAACCGTGCATGTCTGGGATAATGACCAAAACGCGGTACAGCGCAAAGCGCGTCTGTGAAGGTTATGCTAACCGGCTGTG  
GCGTGGTTGGCGGGACTCTCAGCCTGGCCTCTGAGGCTGCATATTATGCGAGACTGCCTGGCAACCAGAAATGGGCGCCGC  
GCCCCGTTCCGATAAACTCATGGAACCTTCTGCACTTCAGCCCCGTTCCACAATTTTATGCGTGGCAAGCCTGACAATAACCCGT  
GGGGGCCAGCGCTGACCATGTTCCGCACGATCAGCGGTACGCCACTCTATTTTAAATTTCCATGTGACCCCCGTTGAAGAATT  
TCCTACGGTAAACGCCCGCTGGGCCATGCGTTAATAACGGGTATGTCGGGGGAAGGTAAAACCACGCTGCTTAACTTCTGCT  
GGCGCAGTCAATGAAGTACAACCCGCGGCTTTTTGTTTATGACCGTGACCGCGGTATGGAGCCGTTTATTGAAGCGTTGGT  
GGCTACTATAAAGTTCTGCAACAGGGTATGCCGTCCGGGTTTGCCCCGTTTCCAGATTGAACCGACCAAACGCAATATTGCCCT  
CATTAAAAACCTGTTCCGCATTTGTGTGGAAACCACCAATAACGGGCCTATCAGCGCAACGATGGCTACCGAACTGGCTGAAG  
GCGTTGATGCGTTATGGGGGAAGGCTCACTTATCCACGCGAGGCGCGCACCGTTACTATCCTGGACGGGTACGTGAATGA  
AGTTGTGGAAAATGGCGTATCACTGAAAGGGCTGCTGCGCGAATGGACGCGCGAAGGCCAGTATGGCTGGCTGTTTGACAA  
TGATAAAGACAGCCTGGATCTCAGCGGAATGATATTTTTGGCTTCGATTTATCCGAGTTTATCGCAGCCAAAGAGGAAGTATC  
CAGCCCCGCCCCGACTCCGCTCATGATGTACCTTCTGTACCGGGTACGTGACTCCATCGACGGCAAACGCCGCGTCATTCAGT  
GCTTTGACGAGTTCCACGCCTACCTTGACGATCCGGTTATCGAGCGTGAAGTTAAGCGTGGTATCAAACTGACCGTAAGAA  
AGACGCTATCTATGTGTTGCCACGCAGGAGCCGAACGATGCGCTGTCCAGCCGATTGGCCGCACGATCATGTGCGCAGACCG  
TCACAAAAATCTGCCTGCGGATCCGGAAGCTATCCGAGAGGATTATGCCTTCCTTACTGATGCTGAATACGACGCGCTGATGT  
CGATTACCGAACACTCCAGACAGTTCCTGGTTAAACAAGGGCAACAGTCTGCGATTGCTTCTTTCAATCTCTACCTCGCAAC  
AGCGACGATATTGATGCAGATATTAAGACAATGGACAACGTTCTTAGCGTGTTGTCCGGTGAACCACAAAACGCCGAAATTGC  
GCATGAGCTGTTGAACGGCTCGGTAATGACCCTGAAGTATGGCTCAAAGAATACTGGCGCCTGACGGCTTAAACAACGAGGC  
AAAACACCATGAAAAAAACACTGACGGCAGTATTGCTGACCACCGGCCTGATACTGGGAGGCGCGCAAAGCGCTTCCGCAG  
GCATCATCGTGACCAACCCTACTGAGCTGGCTAAACAGGTCGAGCAGCTTCCAGCAAATGGCGCAGCAGCTGGAGCAGCTTA  
AAAGCCAGCTGCAAACGCAGAAAAATATGTATGAGTCGATGGCAAAGACAACCAACCTGGGCGATCTGCTGGGGACGTCTA  
CCAGCACGCTGGCAAATAATTTGCCGGACAACCTGGAAGGAGATCTACAGCGACGCCATGAACTCCAGTTCTTCCGTCACGCC  
TTCAGTTAACAGCATGATGGGCCAGTTTAAATGCGGAAGTTGACGACATGACGCCCAGCGAAGCAATTACCTACATGAACAAA  
AAGCTGGCTGAAAAAGGCGCTTATGACCGTGTTATGGCAGAAAAAGCCTACAACAACCAGATGCAGGAACTAACCGATATGC  
AGGAGCTGACGGAGCAGATTAACGACTCCAGACCTGAAATCGATTGCTGACTTACAGGCCCGTATCCAGACGTCACAGG  
GTGCTATTCAGGGTGAGCAGGCGAAGCTGAATCTGATGAACATGTTGCAGCAGTCACAGGACAAGCTATTACGTGCGCAGAA  
AGAACGTGCCACCCACAATTTTGTGTTTTGGAACCGGCGGGGACGTTACCGCGTCACCTTCAATTAACCTGAGGTAATTATGAAA  
AAACTACTGCTTGTATCCCTTCTCCTAGTGGCCTGCGATGCCTCGCATGACGTGGAGTGGTACAAAAACATGAGAAAGA  
GCGCAAGGCAACAATTCAGGAATGCAAGAAAGACGCGGATGAACTTCAGAAACCTGATTGCAAAAACGCGCGCGAAGCCG  
ATCGTCAGCTGTTTGTGTTCCGGCAAAAAGACGGCGAAATCAATTCACCGAAAATTTAGGAGTAAGGAGGCAATATGGCATT  
CACCTAGTCGCAGACATTTTCGCAAAAGTAGACGGGGCGATTACGTCAATGGTGAGCGCCAATGTTGCCACCATTATCTCTG  
ATGTAACGCCTCTGATTGCCACCTGTCTGACAATCAAGCTGATGGTTCAGGGGATGTACTCAGCGTTTAAATCCGGGGGGCGGGC  
GACAGCCTGAGTTCGCTGATTAAGAGTATCTTCCATAGCCCTTATCCTGAGCTTTGCAACGGCGGGCGGCTGGTATCAACA  
GGAACCTGGTCAACGTGGCGCTTACCTGCCGGATGATTTTGCCGGGATACTGTCTGCCCTAATAAAGTCGGTGAAGTGGC  
GTACCGGCGATTATTGATAGCGGTATTGAAAAAGGTATCAAGATCGTCAACACCGCATGGGAAGCCGAGACGTGTTTTTCATC  
GAGCGGCCTGGCCGCGTATGCCATTGGCGGCATTATGATGATTGCTACCGTTGTGCTGGGCGGCCTCGGTGCGGGCTTTGTG  
ATCATGGCTAAGATCCTTCTGGCCGTTACGCTTTGTTTTGGCCGATTGCAATCTTCTGCCTGCTGTGGGGAGCGACAAAAAA  
CATCTTTGCTCGCTGGCTGGCGTCCGATTAACCTATGGCCTTGTGCTCGTCACTTCTGCGCTCGTGTGTTGGTTTCATCATGCAG  
ATGTTGACAACCTCCTGCTCGATGAACTCTGATGCCGCTTACTCATCAATCACTGGTTCTATCTCCGCTTATTACTGACGGT  
CATTTCCGTTTTCTGTTCTGTTCCAGATTCCGCAAATTGCCGCCAGCTGGGGTAGCGGTATCAGCGCCGGAGTTGCTGACGCCG  
CACGCTCTACGGTTCTTCCATGCAGGCGCTTGCAATATGGGCAGCCACGGCATGTTTGGCGGTAATGCGTTCAGAGGCGG  
TAACAGTGGCGGCGGCCAGCAATCGGCAGGTGGAGGAAGTGGCAGCAACAGCGGAGGAAGCAGTGGTTCTAATTTAAGTG

GTAAGGCAAGGGGCGAGTCGCGGGAAGAAGGCTGCATAAAATTA AAAACAAAAGTCGTTGAAATTGCAATTCGACGACTTAT  
TATAATTAGTACGTTCAACAACCGATAATGGATGCCGTAATGCGCAGCTTATTGCTTATGGGAGTTCTTCTGATTAGCGCCTGTT  
CCAGCGGGCATAAACCGCCACCGGAGCCGGACTGGAGCAACACCGTTCCAGTAAACAAAACAATCCCGGTTGATACGCAAG  
GTGGTGCAAATGAAAGCTAATAAAAAAACAGGGCTTACACGTGAAGCCATTAAAGAGTTCAACGAAAGCCGTAAAGGGCTT  
GAAGTTGATCTGATGGATGAAGTGCTGAAGTCCCGGCGTACCGCCTGGATGGTTGCCACCGTTTACGCGGTGGTAACTGTTT  
TTGCACTCTCTTTAGTTGGTTACGTGGTGCATAAGTACAGCCAGCCAATCCCCGCACATCTGCTAACGCTCAACGAGGCCACTC  
ACGAAGTACAGCAGGTCAAGCTGACCCGCGACCAGACCTCTTATGGTGACGAAATTGATAAGTTCTGGCTGACACAATATGTC  
ATTCACCGTGAGAGCTATGACTTCTATTAGTTTACGGTTCAGGTCGACTATACGGCCGTTGGCTTAATGTCCACGCCGAACGTGGCAGA  
GTCTTACCAGAGCAAGTTCAAGGGCCGCAACGGTCTTGATAAGTTCTGGGCGACAGTGAACGACCCGCGTGAAGATTAA  
CTCTGTGATCCTCGATAAACCGCACGGCGTAGCAACGATACGCTTTACTACGGTTCCGCCGCTGCGCAGCAATCCCGTTGATG  
ATCAGCCGCGAGCGCTGGATTGCCATTATGGGGTATGAATATAAATCGCTGGCGATGAATGCTGAGCAGCGTTATGTCAACCCG  
CTGGGTTTCCGCGTGACGAGTTATCGCGTCAACCCTGAAGTAACTGAGGGCTGCCCATGAAAAAACTACTTCTTTTACGAG  
TCGTTTTGTGAGTCTGGGAGGCGCGGCCACTAACGTTATGGCGCTTGGAGTTGGCCGCAATTCTCCTTATGACTATCGCATT  
AAAGCGTTGTTTATAACCCTGTTAATGTGGTCAAAATTGACGCTATCGCCGTTGGTACCCACATTGTTGTCGCGCCTGACG  
AAACCTATATCACTCATGCTTTTGGCGATTCTGAAAGCTGGACGTTTTCGCGCAAAAATGAACCATTTTTTTGTGAAGCCGAAA  
CAGGCCATGAGTGATACCAACCTGGTGATCGTACCGATAAGCGCACCTATAACATCGTCTCCATTTTATCGGTGAAGAAACG  
AAGAAAAATGCAGACGGTACGGTATCAAATCCTTTATTGAAACGCCGTGGGCTGTGCGCCAGGCCGTTCTTCAGCTGACCT  
ATGAATATCCGTTTGGAGCAGCAGGAAAAAGCCAAAAGCGCGGCTGATAAAAAACGCATTACGCAGAAGCTGAAGCAGACGG  
CTTTTGGCGGGGGCGAAGAATAATCAGTACGTAATGAGCGAACAGCCTGAAATGCGCAGCATCCAGCCGTTTACGCTCTGGG  
ATAACTACCGCTTTACCCGTTTGGAGTTTCCGGCCAATGCGGAGTTACCGCAGGTCTACATGATTTCCGGCCAGTGGCAAAGAA  
ACGCTGCCTAACTCTCATGTTGTGGGTGAGAACCGCAACATCATCGAGGTGGAACCGTCGCTAAAGAGTGCGGTATTCTGCT  
GGGCGATAAAGTCGTTGGCGTTTCGTAATAAATTTCCGCGCCGGGCGCCGTTGCGGTAGCAACCGGTACGGCTTCCCGGAT  
GTGCGCAGGGTTCAAATTGGGGAGGATAACTGATGGCCGTAAGAGTGTGATGTAGATCAGGAACCTGATGAAAACACCG  
GAGACGGTGAATTCGAAAGCGAGCGTGCCGGATTAAAGGCAGTAACCGCCGTTCCGGCTCTGGTATGAAAGCCTTTGTCAT  
ACTGATGGCGCTGCTTGGTTTGGTATTATCGGGATTACGGTTCATGGTAAAATTCGCACCCCGGCTAAAGCTGAAGCTGATA  
AAGACGGTGGTAAAGCGCAACAGGCCAATACACTGCCAAACTACAGCTTTAACAGCGATCCTGATGTTAATAAACCTGCAACT  
GCGCAGAATAGCGCCACTGATGCCCGTGTGTGACAGGCTGCCGACAGGCAGATGCAGATGCGGGCAGCAGCAATACCGCC  
GCGCGTACCTTAATAAGCGTAAAGAACCTTCGCTGAAGAACTGGCTATGCAGCGTCTGCTGGGCGGCGAGCTGGCCGAGA  
CTAATCAGGCGGCTACAAGCAATAGTCCCGGAGTGCAGCCCCAGGACAACGAAACAAGCGAAGGTAGTTTACGCACTCGCTA  
AAAACCTGACTCCTGCAAGGCTGAAGGCTAGCCGCGCTGGAGTCATGGTAAATCCCAGCCTGACTGTTCCGAAAGGCAAAT  
GATCCCCTGTGGTACCGGCACCGAGCTGGATAACACTGTTCCGGGTGAGTTTCTGCGGGGTTTACAGGACGTTTACTCA  
GCTGATGGACTCGTTAGGCTGATTGATAAAGGCTCATGGGTTGACGGGCAGATTACCGGTGGTATCAAAGACGGCCAGGCG  
CGCGTGTGTTTCTCTGGGAGCGTATCCGCAATGACCAGGACGGGACAATCGTTAATATTGACAGTGCCGGAACGAACTCAC  
TCGGCAGCGCGGGGATTCCGGGCCAGGTGGATAACCATATGTGGGAGCGTCTGCGTGGTGGATCATGATTTGTTGTTCTC  
TGACACCTAACGGCGCTGGTTAACAGACGCAGAGTAATAACATTCAGTACAACAGCACAGAAAACAGCGGTGAGCAGCT  
GGCGTCTGAAGCACTCCGCTCTTACATGTCTATCCCCCTACCCTCTACGATCAGCAGGGTATGCGGTGAGCATTGTTGTTG  
CCGCGACCTCGATTTACGCGCGCTTTATACGCTCGCAGACAACTAAAAAGTGGGCGCTTAGCGCCCGCTTTTCTTCAGGAG  
TAATCATGACTGATGCAGCTTTCTATCAACTGGCCACTGCGCGAGTATTTAGAAGATCCTACTGTTTTTGAATTCGCATTAA  
CTGCTTTACAGGAAGTTATCTGTGATACGTTTACGCGGCCGAGGGTTGTGAGAACGCGGCAATTACGGCAGATTTTATTAGG  
AACCTTGCTAAATCGTTGGTGAGCAGCAACAAGCTGACCATGCAGGCCATTAATGACGTGATCCTGCTGGCGGGATCAGGG  
GCGTTATCTGTCTGCCCCCTGCGGTGATTGACGGTACAACGGCCGTAGCGTTTCGTAAGGATTTGGCGGCCGATAAAAATCTG  
GAGCAGCTGACCCGCGAGGGGATTTTACGTGACTGCCGGAAGATTACCGGCAGCAAGCAAAGCCTAACGGATGATGATTTT  
TTCCTTAAAGAGCTGCACAGCAGCGAAAAATGGCCCGCATTCTGCAAACCGCCGTTGAGAAGAAACGCACTATCGTGATCT  
GCGGTGAAACCGGGTCCGGGAAAACGGTACTCACGCGCGCGCTGTTAAATCGCTACATAAAGACGAGCGTGAATTATTTT  
AGAGGACGTTACGAAGTCACGGTGCATCACGTTGTAGAAGCCGTTTATATGATGTACGGCGATGCAGGAAAGATCGGCCGC  
GTCAGCGCCACTGATGCCCTGCGAGCCTGTATGCGTCTGACACCGGGCCGATCATCATGACTGAGCTTAGGGATGATGCTGC

GTGGGATTATCTTAAAGCACTTAATACCGGCCATCCAGGCGGTGTTATGTCAACGCACGCTAACTCTGCGCGCGATGCCTTTAA  
CCGTATTGGGCTGCTTATCAAGGCGACCCCTATCGGCCGTATGCTCGATATGAGCGATATTATGCGAATGCTCTACTCCACCATT  
GACGTTGTGGTGCATATGGAAAAGCGGAAAATCAAAGAAATTTATTTTGACCCTGAATATAAAATGCAGTGTGTGAACGGGA  
GCCTGTAATGAAAACTTAGCAACCTGGCTTCTGGCCGAGCATTACGACAGCCGCCCTGCCCGCCTTTGCGGTGGAACCA  
TCCGTTCAAGTTGGCTACTCGCCTGAAGGGGGGGTAAGCGGGAACCCAGAAAATCCGCCATTCCGCATTGTGGAATTTTT  
TGGGGGGGTGGTCCGCGGCATGACGACCCGCCAAAGGCTACCGCATCTATCTGAGGCGCTGTGGCGCGACGCTGAAACCCC  
GGGAATTCCGCTACTCCAGTCCAGTCCGCAATAGTTCGTCCAGGTCGGGTGGCGTACGCCGGAACGCCGATTTTTCCG  
CAACCGTTTCTGCGTTGTGCGCAAGGTGGTCTCAGAGAGCGCTCAAGAAGCGGTTTTTCTCGTATGTTTAGCTACGGTGGCC  
TAGGAGCCTGCGCGGAGAAAGCCAAATCGGCGGAAGATCGAGGACGATACGGGGATGGCTGCCAGTTACCTTCTTACCGA  
CCCGACCAATCCTATCTGCTGCCCCCTTCTCTGGGAGAGTGGCTACCTGAAGGGCATCTTGCCACTTCATCAGCGAGACTGTC  
GATACGCTGGACTTGAGCGCATTCCACGCCCGGTATGCCGCGGTGGTCCGGGCAATCAGCCGTTTCATCCGGCGATGATGG  
TCAAAGTGCTGATCTATGTTACGCGAGCGGCGTCTTCTCTTCGCGCAAAGTACCCAGGAAGCTGTACGAGGATGTCGCGTT  
GCGTGTGCTGGCCGCTGGAACCTCCCGGCCACCGCACGCTGAGTGACTTCCGTGCCCTACACCTGACCGAGCTTGAGAAT  
TTGTTTCGTTCAAGTGGTCAACTGGCGCGCAATGTGGGCTGGTGAAGCTTGGCACGATCGCGGTGACGGCACCAAGGTA  
AAAGCCAACGCCAGCCGCCACAAGGCGATGAGCTATAAGCGCATGAAGCCGGCCGAGGACGAATTGCATTGCGAGATCAAG  
GCGCTGCTTGATCGCGCAAGGCTACCGACGACCAGGAGCGTAACGAGCCGGAGCTGGACATTCTGCCGAGATTTCTCGC  
CGCGAGAAGCGCCTGGAGGCGATCCAGGCGGCAAAGGCGCGCCTGGAAGGGGTCGTTCCGGCTGAGGGCGAAATGACA  
CCCTAAGCTTTTCGTTTCTTGGGCCAAAGATATTCGCCAGTCAGTAGAATGTGCGCCAGCCCAATGGGGATATGTGGGGAA  
GAAATTCAGGGGGAACATCCAACCCTTCGTTCCGCGCTCCGTGACGGCATGACCAAGATGGACGGTATTCCAGTAAATGAT  
CACCGCAGTCAATAAATTGAGCCCAGCGATTCCGGTAGTGCTGCCCTCTGTGCTGCGATCGGAATTTCCCCCTGCCTCCCGAT  
ACGGAGCGCATTTTTGAGCGCATGGTGGGCCTCTCCCTTGTTAAGACCGATCTGAGCACGCCGCTGCATGTCCGTATCCAGGA  
TCCACTCAATAATGAAAAGGGTCCGTTCAATACGACCAACTTACGAAGCGCAACTGCAAGGTTGTTTTGTCGTGGGTAAAG  
AGCGAGCTTGCAGGAGTTGGCTGGGCCTGATTTTCCAGCGGTATCGTTCGCGGACACAACGGAATAATCAGGCCAGTT  
CGCAACGATAAGATCCTCCCGGGCTTTTCCACCTACCAACTTGCGTAACTCCCTGGGGGTCGTATCGGGATTAATACTGACAA  
CCGCTTCGATGGCAGATCCCTGATTCGAGAACGAGATTGTAGCCGAGCAGGCTACTGGCTCCGAACAAATGGTCGGTGAAT  
CCTGCTGTATCGGCATACTGTTCCGCAACATGGCGACCGACCTCGTTCATCAGTAGTCCATCGAGAATATACGGTGCCTCGCTC  
ACGGTCCCGGGATCGACTGACAAGCGAATGGCGGCAACTGGTTCGCTTACGTGAGTATACGCTTTGAGGCCGGGAACAGAA  
CCATATTTGGCATTGACCATGTTTCATGGCTTCGCCATGCCGCGCTGTGCGGAAAAACTGACCATCGCTCGATGCTGACGTGCC  
CATCCCCAGACGCGTGACATCGGCAGTTTACCCTGCGCGGCCACCACAATTGCCAATGCCTGGTTCATGGCTTCGCTTTCAA  
CATGCCAGCGGGCAAGGCGTGAGAGCTGCCAGTAATCATGCGTGTGTTGAGCTTCCGCCATTTACGCAGGCCAGATTGAG  
CCCTCAGCGAGCAGGACGTTGAGCAGACCGATCCGGTTCGCGACATGGAGCCCCGTTTCTCAGATGGGTAAACGCATCTGT  
GAAACCAAGGGCTGCATCAACTTCAAGCAGCATGTGCGTAATCCGAACGGACGGCATTCCGGCGATACAGATCCAGTATGAGT  
GCCTCGGCACCATCCGGCACGTCTGCTGTCAACCTGTCGATCCGCAACGTTCCATCTTCTATGCTACCGTGCAGGAATAGTCCG  
TTACGGGCAGCCCCGGGCCAGCCGCTTAAGAGCGATCGTGAGTTCGCGCCTTTCTGTCTGCCAGCCAATCCTGTGGGTTGGAAG  
GCACGGCCAGTTTTGCATTTTCTGCGCCGCGATCATCGGCACCGTACCTGCTTGAAGTACCATAGCGGCGCGAATGAGC  
GAGCCAGACATCTCCGGAACGAAAAGCATCCCGGAGGTGAAAGAGTACCGCCACTTCCCAAAGACGGGTATCTCCTTTTTCC  
TGAGCTCGTAAATGACGGTTCATTTGGAGCTGGGCCGAGGAAACGCCTTTCTGGCGATGCAACACCTTTTCATCTCTCCGAT  
CGACAAAGCTGCTGTACCAATGGTCCGGCGACCGGCGCGGCTTCGAGCTTACGACAGCGCAACATGCGGGGGCGCATAACG  
ACGAAAGCGATGGTATCCCTGCCGACATATGCAAGAGGCTCATCGGCTAGCGTGTGCTGAGTTGAGTCCCTGTGCTACCA  
GTTGAGCGAGCCGGTCCCATGCAACCGAACTGGCGACAGCCATCTCCAGCGGGGTTCCGTCACTGCGGGCCTCAAGCAACG  
AAGCTCCCAGCGCGGTGAAGGTACGGATCGTATCCGTGAGTGTGGCTTTAGAGCCGGAATGTTTCGTCATGCTGGCGCTT  
CGCTTCCCGCAGGTTTTTCTACGATCCTGTGATGGGTTTTGACTATGGCATCAGCAATCGCCGCTTCCCACTCCACAACACA  
GACGGCAAGGATCGCCAGCGGCGGTCCGAAGTATGTCACGCAAACCGTCCGTGAAGTAGCGTTACCCCTGCCGACGCA  
GCCGGGCAATGCGATGGGCAGGTATGCTGGCCAAAGCACTATGATTGATATTCAGGGTACGCAGAAATTCGAGCCTGTGAG  
CAAACGGTTAGCAGCAGCCGAGTTGTTACCAACCTCGAAGTTGCGAAGCCAGATGAAACGACTGATATTGCCGGCGAGCATT  
TCACTCAGAAGTTTGTCCAGGTGATCGCGAACATCCGCTGTAAATTTCCACAATCCGCGTTTCAATCCGCCGCTCAGCGGC

GACCAGAGCATCCGCGCACAAGCGCTCGATTGTCGATACTGCGGGCAGAATGGTGGAAAGTTTCCCGACACCGCACAATAAA  
ACGATGAGCAAGATCCTCGTTTGATCTGGCATCTTCGGCCTGGCCGAAAGTCCACTCCCGCAGATCACGGGCACCACGGCCC  
GTGAAGGTCTTGTAGCCGTAAATTTGCGCAGCGTGTCCATGTGCTGCTGACGGGTTTGGCGCCGTGTGGCATAAGTGAGAA  
GCGCATCAGCCGGAAGCTCCAAGCTGAGCACCGACGAAGGAAAGGACTTCACGCGGGATCATCTCACCAGGAGCCAGTGCA  
CGGCCCGGATATCGTAAGGCACAAAGTTGAGGGCAAAGCCAATCCTGTTTTCCGGTCTGCGGCGCTGCCTAATGTTTTCCA  
GGTCATCATCGCCCAGCGTGTAGAACTTCAGTAGCGACAGTTCGTCCGTGGGCAGATCGAACAGCGCTGCTCGCTGCCGTTT  
GGTGAAAATATGGCGTCGTGACATACAAATTCGTCCCTTTTGAAGTATAGTCTGTTTTGGACAACAGCCAGCCCATATAAATCA  
GGGCGTCCGATACAAAAATCCAGGAGGGTTCAATTGGGACATCGTGCCGCAATTTACTGCCGGGTTTCAACAGCGGATCAG  
TCTTGTGAACGCCAGGAATTTGATCTGCGAGCCTTCGCCGGCCGTGCCGGCTACGACGTGGTGGGAATATTTAAGGAAACAG  
GTTTCCAGGAACTAACTCGACCGGGCCGAGCGAAAGAAAGTCTGGCGCTTGCCAGTCCAGACAAATTGATGCAATCCTGG  
TCACTGAGCTTTCCCGGTGGGGGCGCTCGACGCTCGATCTGCTCAATACGCTACGTGAACTGGAGAAGTGGAAAGTTTTCCGT  
GATAGCCATGAATGGAATGGCGTTCGATCTTTGTCGCGTATGGACGAATGCTGGCGACGTTTTCTTTCCGGCATTGCGGAGT  
TTGAGCGGGATCTCATCAGCGAGCGGGTCAAGTCAGGCCTTGTGTTGCGAAGGCACGTGGTAAGAGGCTTGGTGCCTCAGG  
CCGGAGTGCACAAAATCAGACCGACTTTTGCCTAAGGTGGTTGCGATGAGGGCCGAGGGACGCAGCTATCGCTGGATCG  
CACGCGAGCTCGGTATCAGCAAGAATACCGTCGCTGACATCGTGAACGACACAGAGCTAACGCTTAGGGTGTCAATTCGCC  
CTCAGCCGGAACCGACCCCTGGAAGCGCGCCAGCGTGAAGCGGACCAGGCCCGGGGGCGCAGCGAAGACGATGGCCGCC  
GGCCTCGCCATCCGGATGGCTCGGACAAGGGCGGTGGCTCGTACAAACGCGAGTTTGGTGTGCCGGATGACCGTGATCAGG  
AAAGCTTACCGATCCGGACAGCCGATCATGAAACACGCCGGTGGTGGCTCCGAGCAGAGCTACAACGGGTACACAGCGG  
TCGATGCCGAGCACAGATCATCGTGGCGGCGGAGTTGACCAACTGCGCCGCGGACAGTCAGGCGCTGCTGGGCATGCTGG  
CAGCAGTTCAGGCCAACACCGGAGAAATGCCGGCCAGACGCTGGCGGATGCGGGATTCCGTAGTGAGGCTGTTCTGGCA  
AAGGTCGCCGATCACCACGGCGATGTCATCGTTGCCCTCGGCCGCGAGGGACGTGAAGATGCCAAGGTCAATGCCAAGACC  
CATCCGCATACGGCGGCGATTGCGGCGAAATTGAAAACGGAGCAAGGCGATGCAGCTTACCGCCGGCGCAAGTCGATCGTG  
GAGGCTCCGAATGGTTGGATCAAGGCGGTGATGGGATTGCGTCAGTTCAGCATGAGGGGCTGGACAAGGTGCAAGCCGA  
GTGGAAGCTCGTCTGCATGGCGCTAAATCTGAGGCGAATGGCGTATCTGTGAGGGCGAAGGTTAAATGGGGCGGCTCAAAT  
GCACCCAGTCGTCATAACACGCCGCGCGCCGAAGATTGGTATCCTTGCGCCGACGCCTTGCCAATTGCAGAGAGCGCCG  
CCGCCATCGTCAGTGTCTACAGAAAACCGGTACACGGCTCTGCCGCGCAGACTCCTAGCCTAAATGTGACAGTGGTTGGT  
AATCCATGCCGCCCGCAAGGGCGGCGGTGGTGGGCCAATAGATGATTTTTAGAGCCTTACTGCCCGTTGACGCCAATCCCT  
CGAGCGCGAGTCTAGCCGAGCGGCGATGACGGCCTCGCTGTGCTTGTATCCTTGTAGGCGCCCGGGTGTAGACGGCCA  
ACACAATAGGTGCGCGCCAGTGGGCCAGACGACGGCATAGTCATTTGCCGTGCCATACACTCCGCAGGTTCCGGTTTTGTC  
TCCGACTGCCAGTCTGCCGGCACCGCCGCGGGATGCGGTGGTTGCCGGTCTGTTTTCCCTTTAGCCAATCAACAAACTGC  
TGCCGCTGCGGCGCAGCCAGTGACAGGCCAGTGTGAGTTTTTGTAAAGCTTCCGTACGGCGCGCGGGCGATGAGGTATCG  
CGCGCATCGCCTGGGATGGCGGAGTTCAGCTCCAGCTCCAGCGGTCCAGACGGAACGTGGTATCGCCGATAGAGCGCATG  
AAGGCCGTGAGCCCGCCGGGCGCCCAACTCCTCAGCAACAAATTGGCGGCGGCGTTATCACTGTATTGCACGGCGGCC  
GCGGACAGCTCCGCCACCGTCATGCCTGTTGTGATGATTTTTCCGAGATGGGTGACCACGGAACCAGCGCATTTTTGCGGTA  
ACGGATGGGTGTGTCCAGCAAGCCGGCCTGCTGCTGGCTGCGAGCCAGCACAGCGGCAGCAAGAAAGCCCTTGAATGAGC  
TGCACAGTGGGAAGCGCTCCTCAGCGCGGTAACCTACAGTTGCGCCTGAGCCGGTATCCATCGCGTACACACCGATGGAGCC  
GCCAAAGTCTGTTGAGTTTTAGCGAATGGTTCCGCGACGAGGTTGGTACGCGCGGTGGCAGAAAAGCCAGCCAGCGGCC  
ATGAGAGACAAGACAGCAGAAGTACGAGCGGATACAGTACATCAACGATATTCCTTGTGTTGAAGGTGGAGTTACGGACGG  
CCTCAGGAAGTCTGGCCAAGCCCGACTATTGGGGCGCGAAGATAGCACCGAGGGTACGCCGGTGTCAACACGGGGTCTG  
ACGCTCAGTGGAAACGAAAACCTCACGTTAAGGGATTTGGTTCATGAGATTATCAAAAAGGATCTTACCTAGATCCTTTAAAT  
AAAAATGAAGTTTTAAATCAATCTAAAGTATATGAGTAAACTTGGTCTGACAGTTACCAATGCTTAATCAGTGAGGCACCTAT  
CTCAGCGATCTGTCTATTTGTTTCATCCATAGTTGCTGACTCCCCGTCGTGTAGATAACTACGATACGGGAGGGCTTACCATCT  
GGCCCCAGTGTGCAATGATACCGGAGACCCACGCTACCGGCTCCAGATTTATCAGCAATAAACCAGCCAGCCGGAAGGG  
CCGAGCGCAGAAGTGGTCTGCAACTTTATCCGCTCCATCCAGTCTATTAATTGTTGCCGGGAAGCTAGAGTAAGTAGTTCG  
CCAGTTAATAGTTTTGCGCAACGTTGTTGCCATTGCTGCAGGCATCGTGGTGTACGCTCGTCTGTTGGTATGGCTTCATTCAGC  
TCCGTTCCCAACGATCAAGGCGAGTTACATGATCCCCATGTTGTGCAAAAAAGCGGTTAGCTCCTTCGGTCTCCGATCGT

TGTCAGAAGTAAGTTGGCAGCAGTGTATCACTCATGGTTATGGCAGCACTGCATAATTCTTACTGTCATGCCATCCGTAAG  
ATGCTTTTCTGTGACTGGTGAGTACTCAACCAAGTCATTCTGAGAATAGTGTATGCGGCGACCGAGTTGCTCTTGCCCGGCGT  
CAACACGGGATAATACCGCACCACATAGCAGAACTTTAAAAGTGCTCATATTGGAAAACGTTCTTCGGGGCGAAAACCTCTCA  
AGGATCTTACCGCTGTTGAGATCCAGTTCGATGTAACCCACTCGTGACCCAACTGATCTTCAGCATCTTTTACTTTTACCAGC  
GTTTCTGGGTGAGCAAAAACAGGAAGGCAAATGCCGCAAAAAGGGAATAAGGGCGACACGAAAATGTTGAATACTCATA  
CTTTCCTTTTTCAATATTATTGAAGCATTACCAGGGTTATTGTCTCATGAGCGGATACATATTTGAATGTATTTAGAAAAATAA  
ACAAATAGGGGTTCCGCGCACATTTCCCGAAAAGTGCCACCTGACGTCTAAGAAACCATTATTATCATGACATTAACCTATAA  
AAATAGGCGTATCACGAGGCCCTTTCGTCTTCAAGAATTTTATAAACCGTGGAGCGGGCAATACTGAGCTGATGAGCAATTC  
CGTTGCACCAGTGCCCTTCTGATGAAGCGTCAGCACGACGTTCTGTCCACGGTACGCCTGCGGCCAAATTTGATTCCTTTCA  
GCTTTGCTTCTGTGCGCCCTCATTGTCGTTCTAGGATCCTCCGGCGTTCAGCCTGTGCCACAGCCGACAGGATGGTGACC  
ACCATTTGCCCATATCACCGTCCGTACGGCACTGTTGCAAAGTTAGCGATGAGGCAGCCTTTTGTCTTATTCAAAGGCCTTAC  
ATTTCAAAAACCTCTGCTTACCAGGCGCATTTCCGCCAGGGGATCACCATAATAAAATGCTGAGGCCTGGCCTTTGCGTAGTGC  
ACGCATCACCTCAATACCTTTGATGGTGCGTAAGCCGTCTTCATGGATTTAAATCCCAGCGTGGCGCCGATTATCCGTTTCAG  
TTTGCCATGATCGCATTCAATCACGTTGTTCCGGTACTTAATCTGTGCGTGTTC AACGTCAGACGGGCACCGGCCTTCGCGTTT  
GAGCAGAGCAAGCGCGGACCATAGGCGGGCGCTTTATCCGTGTTGATGAATCGCGGGATCTGCCACTTCTTCACGTTGTTG  
AGGATTTTACCCAGAAACCGGTATGCAGCTTTGCTGTTACGACGGGAGGAGAGATAAAAATCGACAGTGCGGCCCGGCTG  
TCGACGGCCCGGTACAGATACGCCAGCGGCCATTGACCTTACGTAGGTTTCATCCATGTGCCACGGGCAAAGATCGGAAG  
GGTTACGCCAGTACCAGCGCAGCCGTTTTTCCATTTAGGCGCATAACGCTGAACCCAGCGGTAAATCGTGGAGTGATCGAC  
ATTCCTCCGCGTTCAGCCAGCATCTCCTGCAGCTCACGGTAACTGATGCCGTATTTGCAGTACCAGCGTACGGCCACAGAA  
TGATGTCAGCTGAAAATGCCGGCCTTTGAATGGGTTTCATGTGCAGCTCCATCAGCAAAAGGGGATGATAAGTTTATACCAC  
CGACTATTTGCAACAGTGCCTTATTTGAGCATTTCCTTTCGAAAAGCCGACCGGGAAAATTGACATGCGTACCATTGCGCT  
GGGGTGAATAAGGCGATAGACACCGGTACCTACACATTTACCTTCGCGGACAAATCAACGTTTTAGCCCGCTACACATTCA  
CTTATGCATGGGACGGTAAAGAGTGGAATAATTTCCACACACCACTCTTCAGCGATGCCTGAAGGGTAAAAGCTGTGCAGGG  
GGCGGAATATTCACCGCTCCCTGAAGACTAGCCAATAATCGCGATGCCAAGACGTTCCATGAGCAACGATGCCTGGTAGTTGT  
CCAATTAACGCCTTGTAATCAACGCGCCGAATATCTAAGTACCCAACTCCGAATTGGTCAGATCGCAATGTGTGAAGTTTG  
CTGCTCGCCAGTCGAAAAGTCGAAAACCTCGCCCGGAGAGATCTGAACCACTGAACGTCGCGCCAGTACCTGGGCCCCCAT  
CCAACGTTTTTCCACAGCTCACACTTTTCCAACACGACTTTTCGAAAATTGGCGTAGCTTAGATTTGTGTTAGTGATATATGC  
ACTGCAAAACCAGGTGCGAGTAGTGATCATATTCATAAACTTTCGCGCCGCAAAATCTGCGCCTTTCGCGCAGCAGTGGCGA  
ATTTCAATGCCAAGCGCACTGGCATTGCGAAAATCCGCCATGGATAAATCACAGCTTTTAAAATGGCATCTTTCAGCATCGCA  
CGACTAAAATTGCACCCTTTCTGGCTTTCACGATCATAGAATGACAGCCGATAAATTCAGTGCCGCTCAGGTGCGCACCTGA  
AAAATCACAGTTAAAATGTAATTTTCAATTTTCTCACCGGTGAAGCGGTTTCTGTTAATTTTTTCGCCAACGAGTGCCAG  
AGCCATATTTGTGCCTGTTTTTTTATACAGTAATGGCGTCATGGTAAACCCTGATGAGGTTATGCGTCAAATCCGCCAATATAA  
CATCTGCAAATGTGCGTTAAATCTGGTGTTTTTTTCAGCAAAGCGCGAAGCTGATGGTAAAGTCAGACCCAGTAATTCAGCGGCT  
TTTTTCTGGTTAAATTTTGCCTGCTGTAAGCTGGTTGTAGAAAGTCTTTCTTCTGCTGCTGCTGGAATTCACGCAGATCCAGC  
GGTAAACCCTACAGACATCGGTTTAGTTTTCCGGCGCCTGCGGCTGCGTCTGTTCTGAAATCCATCCCTGTGCGGTGTTGCTTATG  
CAGTCTGGTCCGGACTCGGCGTCGTATAATTACAGCCATTGCCTGGTTGCTTCATGGGCAAAGCTTGATGCGTGGGGCTTT  
GTAGGTATGGGGCTCATAATTGCTGCCTTTTTGCTCGCCGATCCCATCGTGGAAGTCGCTGCGGAGGCCGACGCCATGGTG  
ACGGTGTTCCGGCATTCTGAATCTCACCGAGGACTCCTTCTTCGATGAGAGCCGGCGGCTAGACCCCGCCGGCGCTGTCACCG  
CGGCGATCGAAATGCTGCGAGTCGGATCAGACGTCGTGGATGTCGGACCGGCCAGCCATCCGGACGCGAGGCCTGTAT  
CGCCGGCCGATGAGATCAGACGTATTGCGCCGCTCTTAGACGCCCTGTCCGATCAGATGCACCGTGTTCATCGACAGCTTC  
CAACCGGAAACCAGCGCTATGCGCTCAAGCGCGGCGTGGGCTACCTGAACGATATCCAAGGATTTCTGACCCTGCGCTCT  
ATCCCGATATTGCTGAGGCGGACTGCAGGCTGGTGGTTATGCACTCAGCGCAGCGGGATGGCATGCCACCCGACCCGGTCA  
CCTTCGACCCGAAGACGCGCTCGACGAGATTGTGCGGTTCTTCGAGGCGCGGGTTTCCGCTTTCGACGGAGCGGGGTGCG  
TGCCGACCGGCTCATCTCGATCCGGGGATGGGATTTTTCTTGAGCCCCGACCGGAAACATCGCTGCACGTGCTGTGCAAC  
CTTCAAAAGCTGAAGTCGGCGTTGGGGCTCCGCTATTGGTCTCGGTGTCGCGGAAATCCTTCTTGGGCGCCACCGTTGGCC  
TTCCTGTAAAGGATCTGGGTCCAGCGAGCCTTTCGCGCGGAACTTCACGCGATCGGCAATGGCGCTGACTACGTCCGCACCCA



CGCGCCTGGAGATCTGCGAAGCGCAATCACCTTCTCGGAAACCCTCGCGAAATTTTCGCAGTCGCGACGCCAGAGACCGAGG  
GTTAGATCATGCCTAGCATTACCTTCCGGCCCGCCGCTAAATATCTCCTTTTGGGTTGTTAATAAAAACATCCAATAAGTTGACT  
GTGCGTGAAAAAGAAAGTTTTGTGTGATGGCGTTGAAGATCGCACCGTTAAGCTCTTATGTGGGATGGTGCAGAGCTCGACG  
ACTACCGATAAAAACGCAACCGCCGCAAACAGACAAGAAAAAGCCCCAACTGATAACAGTTGGGGCTTCAGTATTGTGATTGG  
TGGAGCAATAGCACCTGAACCCAAAACCTTCTCGCTCAACCGGTAGTGGCTGATAACAACCTCGTGAGGGCTATTGCGGGTT  
AAGCATTTAGCGATGTCTAGGGCCAGACTGGACGTCTGAACGCAAGCCGCTGATACTGTACATAACCACAGTATCAGCGGAG  
GATACCCATGTGCTGGCAAGGAACGCCACGGCGAGTCAATCGCCCACTCAAACAACGGTTACGAACGCCACCAACCCGA  
CCAGACGCTGCTTACCAGCTGGTTGAGCAGCACTACCCAGCCTTCAAAGCCTCACTCGAAGCCCAAGGTCAACACCTGCCT  
CGCTACATCCAACAAGAATTCAACGACCTCCTCCAATGTGGCCGTCTGGAGTATGTTTTATGCGGGTTTCGCTGCGAGGATTG  
TCATCACGAGCGTCTGGTCGCCTTCAGCTGTAAACGACGCGGCTTTTGCCTAGCTGCGGTGCCCGCCGGATGGCCGAGAGT  
GCGGCGCTGCTGATAGACGAAGTCTTCCCAAGGAGCCATTGCGCCAGTGGGTGCTCAGCTTTCCTTTCCAGCTACGCTTTTT  
GCTGGCTCGCCATCCCAGCTGATGGGCCAGGTCTTGAGTATCGTCTATCGTACACTCTCAACTCATCTGATCAAAAAAGCCGG  
TTACACCAAAGCCTCTGCACAAACTGGCTCAGTGACTCTTATCCAACGCTTTGGCTCCGCGCTAAATCTCAATGTCCACTACCA  
CATGCTGTTTCTCGATGGTGTCTATGCCGAAGATGACTATGGCAAGCAACGCTTCCATCGTGTCAAGGCACCCACTTACGATGA  
GCTGAATACGCTCGCTCACACCCTCAGCCATCGCATCGCTCGCTGCATGGAAAAGCGTGGGATTTTGGAGCGTGATGCCGAG  
AATACGTGGTTGACTGGAAGAGGGCGAAGACGATACGCTGACTCAATTACATGGTGCTTCGTTACGTATCGCATTGCCGT  
CGGCCCCAGCAAGGGCGCAAAGTCTTACCCTGCAAACCTTGCCAGGGCGTGAGGATAAAGCCGACTCAAGCAGTCGAGT  
AGCCAACCATGCTGGTTTCTCGCTACACGCCGGTGTGATGGCCGAAGCGCATCAGCGGGATAAGCTTGAGCGCTTGTGTGCG  
TACATTAGTCGGCCAGCGGTTTCAGAAAAACGTCTGGCATTAAACCGCCAATGGGCAGGTGCGTTACGAGCTCAAAACTCCGT  
ACCGCAATGGCACCACCCATGTGATCTTCGAGCCGCTGGACTTCATCGCCAAACTCGCTGCGTTGGTACCTAAGCCGCGAGTC  
AACCTCACACGCTTCCACGGCGTCTTGCACCGAACAGCAAACACCGAGTTCAAGTAACACCCGCCAAGCGGGGCAAGAAG  
CCCGACAAATCGGAAGTCTCGATACTAACTGGCGTGACAAGAGTCTGCAGAGCGCCACCCGCGCCATGACCTGGATGCAAC  
GCCTCAAGCGAGTCTTCAATATTGATATTGAAGTCTGCGAACACTGCGGCGGTACCGTCAAAGTGATTGCCAGCATCGAAGAT  
CCGAAGGTCATTGAGCAGATTCTCAAGCATCTGAAACAGAAAAAGCCAAGGCGAATGCCGCCAAGCAGCGTGAGCTGCCA  
CCAGAACGAGCGCCGCACTGACTCCCAGCCTGTTGATCCATCACAGAGTCGTCTCTTTGACTGACGACCCCAAATCCAACA  
CTGCTCAACTGCCAACTTTTAAACGGGGCGGTGGGGCAGTTTGTATCTCTCGAGCTATCAGGCTAGAGATTTTACCGCCAA  
ATCGAACCTTATTAGAGCGGTTTAGGCTGGACCGGCAGTTAAATTGGGGCTTGAGCGGTAAACGAGTGAGGGAATTTAG  
GTAAGATACTTCGGATGAGGAGCAAAAAGGTGGTTTATACTTCTATACCCAGTAGTGTCCCTGTGCGTTTGGTTGGGGTC  
GATGCCCCACTTTGGGCGCGGCTTGGGCGCCGAAGATGAAAGCTCTGTGTGAAGGCTTGATATTAAGACCTTGATGAT  
TTCAATGCCATACCGAAGAGCAGATCGTTAGCGTCGACAAATTCAGCTACAAAAGTCCGCAAAAAGTGCTTGCAAGGTATGG  
CTGAACATGCCGAGCTATTCAACAAGATTCAATCAATCATCGGGTTCAAACAGCAGGTCACTTCGGGGGATCGTTTTACCGGT  
GAGAAGATCGTGATCACCGGTTTTCGTGACGCGCCTTGAGAGAAGCTGATTGAAGCTGAGGGTGGTGAAGTGCAATCATCA  
GTCTCGTGAAGACCACCATGGTGTGATCGCGGCATCCACTTCCGGATCTTCCGGCAAATTGAAGAAAGTGACGATCTCAACA  
ACAGCGGAAAGGCAAATATCAAACCTGATTGATCTGGCCACCTTCCGTAAGCAATATCTGGAACAACCAGCATCGACTGGTTTG  
GAGTTTTAATGAGTCACCCACAACCTTGAGCTAATAGTCGCTGTGGATTCTAAGTTGGGATTCGGGAAAGGCGGCAAGATTCC  
ATGGAAATGCAAAGAAGACATGGCGCGATTTACGCGGATTTCTAAAGAGATCCGCGTGTGCGTTATGGGGAAACACACGTAT  
ACTGACATGCGTGACATGCAGTTAGAAAAGGATGGCGCCGAGGAGCGAATCAAGGAGAAAGGAATTCTCCCCGAACGCGA  
ATCGTTCTGATCTCCTCGACGTTAAAACAAGAAGATGTCATAGGCGCTACTGTCGTTCTGATCTTCGTGCTGTGATCAACCT  
GTATGAGAATACCGATCAACGCATTGCTGTATTGGTGGGGAGAAGTTGTACATTCAAGCTTTTCATCAGCAACGAAACTGC  
ACATGACCATAATTCCAAGAGAGTTGACTGTGATCGATTTATTCTGTTGATCCGATCCAGAACAATTTTACATTGATTCCAG  
TGCCAGCGAGACTGTGGAGGCAACCGTTGATGAGACTCAAGAGCGCATTCACTTTGCTACTTACGTGCGTAACAATCAGTAA  
CGCGCTGGCAGTGGAAGAACAAGAACCAGAAACGAAGCAGACGGTGTGGCCGTCTGCTTCGAAACATCATTATTGGCTCG  
AGAAGTATCGAGAATACCATTCTGCGGACGACATCCAAAACAATACAGAAAAGATAGCTTTCGAGTTGTGCGGAGCCCCTCC  
CCCCAACTTATAATGGGATTATTGCTGGGCTAAACAATGCTGTGCGCCATGCGTGGGACAGCAAACGTTGAATCGCCATCAAGA  
GCATCCACAGATTTACGTGACCGTCATCGGTTTATGGTGTATAAATGACACCATAGCCGCCCTGAATCAGACTGATAATGCA  
GTCTTACAGGACGGCGAGTTGCAACAACACTTGTGCGATTATTACAACAACCTTATTGGCTGACATCGTTTGTGCTTTTCAGAA

GACGGCTGCACTGAACGTCAGAAGCCGACTGCACTATAGCAGCGGAGGGGTTGGATCCATCAGGCAACGACGGGCTGCTG  
CCGGCCATCAGCGGACGCAGGGAGGACTTTCCGCAACCGGCCGTTTCGATGCGGCACCGATGGCCTTCGCGCAGGGGTAGT  
GAATCCGCCAGGATTGACTTGCGCTGCCCTACCTCTACTAGTGAGGGGCGGCAGCGCATCAAGCGGTGAGCGCACTCCGG  
CACCGCCAACTTTCAGCACATGCGTGTAAATCATCGTCGTAGAGACGTCGGAATGGCCGAGCAGATCCTGCACGGTTCGAAT  
GTCGTAACCGCTGCGGAGCAAGGCCGTCGCGAACGAGTGGCGGAGGGTGTGCGGTGTGGCGGGCTTCGTGATGCCTGCTT  
GTTCTACGGCACGTTTGAAGGCGCGCTGAAAGGTCTGGTCATACATGTGATGGCGACGCACGACACCGCTCCGTGGATCGGT  
CGAATGCGTGTGCTGCGCAAAAACCCAGAACCACGGCCAGGAATGCCCGGCGCGCGGATACTTCCGCTCAAGGGCGTCCGG  
GAAGCGCAACGCCGCTGCGGCCCTCGGCCTGGTCCTTCAGCCACCATGCCCGTGCACGCGACAGCTGCTCGCGCAGGCTGG  
GTGCCAAGCTCTCGGGTAACATCAAGGCCCGATCCTTGAGCCCTTGCCCTCCCGCACGATGATCGTGCCGTGATCGAAATCC  
AGATCCTTGACCCGCAGTTGCAAACCCTCACTGATCCGCATGCCCGTTCATACAGAAGCTGGGCGAACAAACGATGCTCGCC  
TTCAGAAAACCGAGGATGCGAACCACTTCATCCGGGGTCCAGCACACCAGCGCAAGCGCCGCGACGGCCGAGGTCTTCGAT  
CTCCTGAAGCCAGGGCAGATCCGTGCACAGCACCTTGCCGTAGAAGAACAGCAAGGCCGCAATGCCTGACGATGCGTGGA  
GACCGAAACCTTGCGCTCGTTCCAGCCAGGACAGAAATGCCTCGACTTCGCTGCTGCCAAGGTTGCCGGGTGACGCAC  
ACCGTGAAACGGATGAAGGCACGAACCCAGTGGACATAAGCCTGTTTCGGTTCGTAAGCTGTAATGCAAGTAGCGTATGCGC  
TCACGCAACTGGTCCAGAACCTTGACCGAACGCAGCGGTGGTAACGGCGCAGTGGCGGTTTTTCATGGCTTGTTTACTGCTT  
TTTTTGTACAGTCTATGCCTCGGGCATCAAGGCGAGCTCAGAGACCATGGAAAGCATGTTCTCGGACTTACGTAGCAACTCGT  
TTCTTTTCGACAGTTGAGCCACCTCCGCGCTTCATCAGAAAACCTGAAGGAACCTCCATTGAATCGAACTAATATTTTTTTTGGT  
GAATCGCATTCTGACTGGTTGCCTGTCAGAGGCGGAGAATCTGGTGATTTTGTTCGACGTGGTGACGGGCATGCCTTCG  
CGAAAATCGCACCTGCTTCCCGCCGCGGTGAGCTCGCTGGAGAGCGTGACCGCCTCATTTGGCTCAAAGGTGAGGTTGGT  
CTTGCCCCGAGGTGATCAACTGGCAGGAGGAACAGGAGGGTGCATGCTTGGTGATAACGGCAATTCCGGGAGTACCGGCG  
GCTGATCTGTCTGAGCGGATTTGCTCAAAGCGTGCCGTCAATGGGGCAGCAACTTGGCGCTGTTTACAGCCTATCGGTTG  
ATCAATGTCCGTTTGAGCGCAGGCTGTGCGCAATGTTCCGACGCGCCGTTGATGTGGTGTCCCGCAATGCCGTCAATCCCGAC  
TTCTTACCGGACGAGGACAAGAGTACGCCGAGCTCGATCTTTTGGCTCGTGTGCAACGAGAGCTACCGGTGCGGCTCGACC  
AAGAGCGCACCGATATGGTTGTTTGCATGGTGATCCCTGCATGCCGAACCTCATGGTGGACCCTAAAACCTTCAATGCACG  
GGTCTGATCGACCTTGGGCGGCTCGAACAGCAGATCGCTATGCCGATTTGGCACTCATGATTGCTAACGCCGAAGAGAACT  
GGGCAGCGCCAGATGAAGCAGAGCGCGCCTTCGCTGTCCTATTCAATGTATTGGGGATCGAAGCCCCCGACCGCGAACGCCT  
TGCCTTCTATCTGCGATTGGACCCTCTGACTTGGGGTTGATGTTTCATGCCGCCTGTTTTCTGCTCATTGGCACGTTTCGCAA  
CCTGTTCTCATTGCGGACACCTTTTCCAGCCTCGTTTGAAAGTTTCATTGCCAGACGGGACTCCTGCAATCGTCAAGGGATT  
GAAACCTATAGAAGACATTGCTGATGAACTGCGCGGGGCCGACTATCTGGTATGGCGCAATGGGAGGGGAGCAGTCCGGTT  
GCTCGGTGCTGAGAACAACTGATGTTGCTCGAATATGCCGGGGAGCGAATGCTCTCACATCGTTGCCGAGCACGGCGAC  
TACCAGGCGACCGAAATTGCAGCGGAACTAATGGCGAAGCTGTATGCCGCATCTGAGGAACCCCTGCCTTCTGCCCTTCTCC  
GATCCGGGATCGCTTTGCAGCTTTGTTTCAGCGGGCGCGCATGATCAAACGCAGGTTGTCAAACCTGACTACGTCCACGCG  
GCGATTATAGCCGATCAAATGATGAGCAATGCCTCGGAACTGCGTGGGCTACATGGCGATCTGCATCATGAAAACATCATGTT  
TCCAGTCGCGGCTGGCTGGTGATAGATCCCGTCCGTGCTGGTGGTGAAGTGGGCTTTGGCGCCGCAATATGTTCTACGATCC  
GGCTGACAGAGACGACCTTTGTCTCGATCCTAGACGCATTGCACAGATGGCGGACGCATTCTCTCGTGCCTGGACGTGAT  
CCGCGTGCCTGCTCGACCAGGCGTACGCTTATGGGTGCCTTTCCGCGAGCTTGAACGCGGATGGAGAAGAGGAGCAACGC  
GATCTAGCTATCGCGCCGCGATCAAGCAGGTGCGACAGACGTCATACTAGATATCAAGCGACTTCTCCTATCCCCTGGGAAC  
ACATCAATCTTACCGGAGAATATCGTTGGCCAAAGCCTTAGCGTAGGATTTCCGCCCTCCCCGCAACGACCCCTAAAAGCCG  
TTTCTCTGTATAGGGTTTGAAGGCCAATGGAACGAAAACGTACGTTAAGAATGTAATTTATTGATATTCATAAAAATAAAAA  
AAGGATCGCTGATTGATCCTTTTGTGTTGCTATTTGAATTTGATAAACATTAACCACGAGAATGCAGTAGCTCGGCTATCTCAT  
GAGCAATTTTCATCGATTGTATGAGTTGCAGTACTACGAGCAACTTTGTCTGCTAATGATGGACTAAAATCGACAACCTTCTGTT  
TTGTAATATTATGCCATATGGGAAGCAATATTTGCTCACCGAAATAGCACGAGTGACGATTCCATCAAGTTCATAATTTGTTCA  
ACCTTTGCTTATAAACGCCGAGACAAAACCTAACCACACGACTGTTTGCTAAACCTTTGTCTATTTTTTGTCTCAGGCT  
GTCACCAATTCTTAACGTCATTTTCGTCATAACCATATAAGGCCGTGACTGATTAATGAGTTTGCCAGAGAGCGAACAAAATC  
ATCTTTATCCTCTGAGGCATGCGAAATAAATACGTATGTATCTCGTTGCTCTGTGCTGTTGACGGTGGTCTGTTATCTCTTACCA  
GACTAGGAACCTTCGTTAACGGCCTATCCTGAATTTAGGAAGAACCCTGGAAGAACGCGAACAGAAAGCCCTGGTACTCCC

CCTTAATCCCTGCATATCTACAGCAATATGCCAATGGCCTGATGAAGGGATCTGTAACCTTATGGGGGAGCGCTTTGCTAACCC  
ACCAATGTAGGAATGTCGTGCGCCATTCTTATAACTACTGAAGTTAGAACTATCCATTAGTCTAACATTTGCACCACTGGTAAGG  
GTGATTTCAACAATCTCCCCTCTTTTTCTTTGACCAAGATCATTATGGATGAATTGCATGTAAGTCTGCTCTCTTCATTTGAATTG  
GAAGAATGTAGCCACTTCTGATTATACTGTATCCAGTGGTTGAGAGTATCTCTTAGTGTGAAAAATAAATTATAAGACTTTTA  
CTCGGTATGGATGAAGATGTAATAATCCGTAAACCAGAGAATAAATGAGGAAAAAGCGTGACCAAGCACAAAGTTTTTCATCAG  
TTACCACCATGCTAATGACCAATGGTACAAAAACGAACTTGAAAAATGAATGATGTTTTTGATATTTTTGTGAATCGCTCGGT  
ATCACTTGGTGACATTGATGAAGAAGAAGAACCTCAAAGATCAGAGAAATAAAGGGATGAATATTTACGTGATACATCCG  
CTCTATTTTACTCGTTGGGACTGAGACTAAAAATAGAAAGCATGTTGATTGGGAATTATATTCATCCATGAGGGATAGTCCCA  
GAAACGGCAAATCAGGTATTTTTATTATAAATCTTCCTTCAACAGGGACAAACAACATTAGAGCCAGTCATGGTGAAAATGAA  
AAAAATGAATTTATCCTAATAAACCAGTGGATAACAATCAACGACAGAACAACATATAAAGAAATATATCCATATATGCCTG  
AAAGAGTTATCGATAACTTGATGAGTGAAAAGTCATATATATCAATAGTCAACTGGGATCAGATACACAATAACCCAGAAAACC  
TTAGAAAAATGATTGAGTTAACATATCAAGATAAAGATAAGTGCGAATACGTTTTTCTACCCCAATGAGAATGCGTAATGGCT  
AGCAGAAACAGTAAAGGGGAGTATGATACTCCCCTTACTTGTACCAATCCCATTTGGTGGTGTTCACGTTAAATGTTTGTG  
AACCCGTGATGTGAAAAATCATTACTACTTTAAAATCGTTACATATTTACTGTAGTTATAGTATTGCTTTTGTATTTTATTATA  
GGCGTCAGGTGAACCTTTAATGGTGTATTAGTTATAACATCAATAACTTCATCCTTATCTGATATATATTTATACCATCTTTTATAAT  
TATTTGATTTTTAGTTAAAAATTTATTAAACACCATTAACATATCATTGCTAATATTATAACTCATTGTCTTTTTTTGGATTCAAT  
AGTTTCATTTTCTCTAATAAATTGATATGTCTGATAATATGATGAGATAACTTCATCGAATGCGTCCACATTTTTCTCAACTTA  
AAGATAGCTCTTTTTGAATCCAGATGATTTTTTATACTTTTTCGATATAACGTACCACTTTCATTGAACAGAACATTAACGCCGC  
CTAAACTTAATTTCTCTACTTTAAATGAGTATTTTTTAAAAGATATAACGCTACAATTAGCCATATAAAAATAGATATTAGTAGTA  
TATATATAATACCAGTTACTAAAGGTTTGTTTTTATTAATACGGTGTAATTGAAGGTACATATAATGAAAGATCCACTGTACAC  
ATTACAGCAATTACCGCAATGAAAGCTATCGTCCAAATTATAACAAATGTTCTCACAATCCACCTTGTGAGTTGTAAGATAATC  
AATCATTGATTGGTGAACGTTCTGAATTGATAATTTATATACGGTTGAACGCGCAATACCCATATGCTTAGGGAAGGTGCGAA  
CAAGTCCCTGATATGAGATCATGTTTGTATCTGGAGCCATGGAACAGGGTTCATTATGAGTCATCAACTTACCTTCGCCGACA  
GTGAATTCAGCAGTAAGCGCCGTCAGACCAGAAAAGAGATTTTCTGTCCCGCATGGAGCAGATTCTGCCATGGCAAACAT  
GGTGGAAAGTCATCGAGCCGTTTTACCCCAAGGCTGGTAATGGCCGGCGACCTTATCCGCTGGAAACCATGCTACGCATTCACT  
GCATGCAGCATTGGTACAACCTGAGCGATGGCGGATGGAAGATGCTCTGTACGAAATCGCCTCCATGCGTCTGTTTGGCCGG  
TTATCCCTGGATAGCGCCCTGCCGACCCGACCACCATCATGAATTTCCGCCACCTGCTGGAGCAGCATCAACTGGCCCCGCA  
ATTGTTCAAGACCATCAATCGCTGGCTGGCCGAAGCAGGCGTCATGATGACTCAAGGCACCTTGGTTCGATGCCACCATCATTG  
AGGCACCCAGCTCGACCAAGAACAAGAGCAGCAACGCGATCCGGAGATGTATCAGACCAAGAAAGGCAATCAGTGGCAC  
TTTGGCATGAAGGCCACATTGGTGTGATGCCAAGAGTGGCCTGACCCACAGCCTAGTACCACCCGCGGCCAACGAGCATG  
ACCTCAATCAGCTGGGTAATCTGCTGCATGGAGAGGAGCAATTTGTCTCAGCCGATGCCGGCTACCAAGGGGCGCCACAGCG  
CGAGGAGCTGGCCGAGGTGGATGTGGACTGGCTGATCGCCGAGCGCCCCGGCAAGGTAAGAACCTTGAAACAGCATCCAC  
GCAAGAACAAAACGGCCATCAACATCGAATACATGAAAGCCAGCATCCGGGCCAAGGTGGAGCACCCATTTGCATCATCAA  
GCGACAGTTCCGGCTTCGTGAAAGCCAGATACAAGGGGTTGCTGAAAAACGATAACCAACTGGCGATGTTATTACGCTGGCC  
AACCTGTTTCCGGGCGGACCAATGATACGTCAAGTGGGAGAGATCTCACTAAAAACTGTGGATAACGCCTTAAATGGCGAAGA  
AACGGTCTAAATAGGCTGATTCAAGGCATTTACGGGAGAAAAATCGGCTCAAACATGAAGAAATGAAATGACTGAGTCAGC  
CGAGAAGAATTTCCCGCTTATTCGCACCTTCTTAGCTATTTAGTTGCTCCAGTTCCTTTATCATGCATAAATTTATTTTATTC  
CTGTCTATTTCCGTTTTCTGCCAAATTAATTCCTTTAGACTTGGCCTCAATTCCTTCAATTTGTTTCGTTCAAAGATGCGAGT  
ACGTTCTGCTTGTGCCACTGCTGATAGAATTGTGACGATCATCTTCCCATTTCTCCATCGGTACTGATCCCATCATCAATGAATC  
GGACTGCCACACCCAAGGCATCGAATCTTTTTATTAGTTGAATCATATCGGCAGTGTACGACCAAGACGGTCTAGCTTCTTCA  
CCAGAATGACATCTCCATCTTCCACCTTCATGCGCAACAGCTCAAGTCTTCCCTGGCAGCTGAACTTCCCGATGCCTTGTCCG  
TAAAAATACGGTTGGCTTTTACCCCGCGTTCTTAAGTGTCTAATTTGAATATCTAGGGACTGCTGACTGGTTGAGACCCGTG  
CGTAACCAAAAAGTCGCATAAAAATGTACCTTAAATCGAATATCAGACACCTTGTGTCTATTATGGCAAAAATACGATTTAATAG  
ACAGTCCATGCCTGCCGTTTTATGCTGTCTTATAAATTATAACATTTCCGACGGTTGCGAAATTGTTAATATATAACCGTCAGGCA  
GGAAGGCCTATATGCCCGTCGATTTTCTGACCACTGAGCAGGAACCTAATTATGGTCGCTATGTTGCAGAACCAATGACGTG  
CAGCTGGCGCGCTATTTTCATCTTGATGAGCGAGATCTGCCTTCATTAACCAGCGACGGGGAAGGCATAACCGGCTGGGAA

TTGCGCTTCAGCTCACCACCGCCCGTTTTCTGGGCACCTTTCTGACAGATTTAACCCGGGTTCTGCCGGGTGTTTCAGCAATTT  
GTCGCGGTGCAGCTTAATATCCGCCGTCCGGAAGTCCTTTCCCGCTACGCAGAACGGGATACCACCCTCAGAGAGCATACTGC  
GCTGATTAAGGAATATTACGGTTACCATGAATTTGGCGATTTCCCCTGGTCTTTCCGCCTGAAGCGCCTGCTATACACCCGTGC  
ATGGCTCAGTAATGAGCGACCCGGCCTGATGTTTGATTTTGCCACCGCCTGGTTGCTTCAGAATAAGGTCCTGCTGCCCGGAG  
CAACCACACTTGTACGTCTCGTCAGTGAATACGTGAACGGGCAAATCAGCAACTTTGGAAGAACTGGCCGCGTTGCCGGA  
CAGCTGGCAGACCGCCCGCTGACTGAGCTGCTGGACATTCCTGAGGGGCAGCGAATTTACCGCTGGAGCAACTGAAAA  
GGGACCTGTCACCGTCAGCGGTCCGGCATTACCGAAGCGCTGGAGCGGTATATCCGGCTGCGAAACCTGGAGTTTTCCCGA  
CTGAGTTTTACCGTCTGCCCGCTATACTACGTAATCTGGCCCGTTACGCAGGCATGGCGTCGGTAAAATATATCGCGCGA  
ATGCCACAGCAGAGAAAGCTGGCCGTAACCGCATTCGTTAAAGCACAGGAGACTGCGGCGCTGGATGAAGCCGTTGAT  
GTGCTCGATATGCTTATACTGGATATCACTCGTGCGGCGAAGAAAACGGGGCAGAAAAACGGCTCAGGACGCTGAAAGATC  
TTGACCGTGTGCGCTACTGCTGGCGCAGGCATGTTTCATTGTTGCTAGCTGAGCAGGCTGACGATGCTGAACTGAGGGAGAC  
CATATTCAGCAGCATAACGAAAAGTAGGCTGGCAGAATCCGTCAGCAAGGTAAATGAGCTGGCCCGCCTCAGAACAACAAT  
TTCCATGACGAAATGGTGAACAGTACGGGCGGGTAAAGCGTTTTCTCCGGCGGTATTGCGCGACCTGCATTTCCAGGCAG  
CGCCAGCCGGAGAACATACGCTGTCCGCCATTATTATCTGACCGAACTGAACGGCTCGAAAAAGCGCATCCTGGACGATGC  
GCCTGAACATATTATTACCGGCCCTTGAAACGCCTGGTATACGATGCGGAGGGCCGGATACAGCGTGCCGGTTACTCGCTTT  
GTCTGCTGGAGCGCCTTCAGGATGCACTACGCCGACGGACATCTGGCTCGAAAACAGCGATCGCTGGGGAAATCCCCGCG  
AGAAGCTGTTGCAGGGGAAGAATGGCAGGTTACGCGGGTCCCATCTGTCGGGCGCTGGGACATCCCACTGATGGACATA  
AAGGCGTGCAACAGCTGGCGGTCCAACCTGGATAAAACCTGGAAAGCCGTCGCATCTCGCTTTGAAGGAAATGCGGAGGTTA  
ATATCTGCCATGACGGTAAATATCCTTCCCTGACTATCAGCAGCCTGGAGAACTGGAGGAGCCACCATCGTTGCATCGTCTCA  
ACAGTCGGGTAAGGCAGCTACTCCCGCCGGTAGATTTGACGGAAGTGTGCTTGAGATAGATGCCAGAACGGGCTTTACACG  
TGAGTTTACGCATGTCAGTGAATCCGGGGCCCGGGCGCAGGATCTGCACATCAGCCTGTGCGCGGTCCTGATGGCTGAGGCT  
TGCAATATCGGGCTGGAACCGCTGATAAAGCACAATATACCGGCGCTGACGCGCCACCGGCTCAGTTGGGTGAAACAGAATT  
ACCTCCGGGCAGAAACGCTGGTCAGCGCCAATGTCCGCCTGTTGATTTTCAGTCCACACTGGAGCTTGCTGGCCGCTGGG  
GTGGCGGCGAAGTGGCTTCAGCTGACGGCATGCGCTTTGTCACGCCGGTGAACCCTCAATTCAGGACCTAACAGAAAAT  
ATTTTGTTCCGGACGTGGCATCACCTGGTACAACCTTCGCTCTGATCAGTATTCTGGATTCCACGGCATCGTTGTTCCCGGCA  
CATTACGTGATTCCATTTTTGTGCTGGAAGGCCTTCTGGAGCAGCAGACAGGGCTGAATCCGGTTGAGATCATGACAGACAC  
AGCCGGTACCAGCGACATTATTTTTGGCCTCTTCTGGCTGCTGGGATACCAGTTTTCTCCTCGGCTTGCCGATGCCGGTGAAG  
CAGTATTCTGGCGGGTGGATAAATCGGCAAATTACGGTGCCTAGACGAACTGGCTCGTGGTTGTGCCGATCTGTCGAAAGC  
CGAGTATCAGTGGGATGAGATGATGCGAGCCCGGTTGCTGAAACTGGGTACCATTGCTTCAGAACTCATTGCTCTT  
TGCTGAAAAGCTCGCGCCCATCAGGGTTGGCACAGGCGATCATGGAAGTGGGGCGCGTCAACAAGACGCTGTACCTTCTAA  
ATTATATTGATGATGAAGATTATCGTCGGCGGATCCTGACGCAGCTAAACCAGGGGAGAAGGCCCGCATGCTGTGGCGAGGGC  
GATCTGCTACGGGCAGCGCGGTGAGATCAGAAAGCGCTATCGTGAAGGTCAGGAAGATCAACTGGGTGCACTGGGCCTCGT  
CACTAACGCAGTGGTACTGTGGAACACACTTTATATGCAGGAAGCCCTGAGCTGGATGCGCAGGAATGGAGAAGAAACCGG  
GGGTGAAGATATCGTCCGTTATCCCCACTGATGCACGGGCATATCAATATGCTGGGGCATTATACGTTACGCTACCGGAGGA  
TATTTTGAAGGGGGAAGTGAAGATAAATTTAATTTAAACAATGAATTACCTTCTTAGCGTACGTTTTCGTTCCATTGGCCC  
TCAAACCCCGTATAAAGATCAGCTAAATTATGTGATTGCACAATACATATATGTGAGGTTAGCAGTGAATTTGCCTACGCCC  
AAACCTACGATGAACTTCAGAGAGCCTACGATTTTTTCAATGAGAAGCTATTACGCAACGAGCTGCCGCCATGCCTGATAACG  
TTGCAGCGTGAGAAGCGAACGTATGGCTATTGTTCTTTAAGCGTTTCGTCGGCCGTGAGAGTGGGTACACGGTAGACGAGA  
TCGCTATGAATCCGGTGTATTTCTCGATCAGAACCATAAAGGCCACGCTTTCAACACTGGTGCATGAGATGGTTCATCAGTGGC  
AATTCATTTTGGCGAGCCTGGCCCGGTGGCTATCACAACAACAGTGGGGCGGCCGGATGGAACGGGTAGGACTAATGC  
CTTCTGATACCGGCGAACCGGGAGGCAGGAAAGTGGGCCAGAGCATGACCCATTATATTATTGCCGGTGGCCCTTTGATATG  
GCCTGTGATGAACTGCTGACAGGCCATTTCCAGCTTCTCTGGATGGACAGGTTTCCGCCTTACCAGCCTAAGCCTGGCGCTGT  
GCTAAGCCCTACAGGAAAAGGCTATATTGACGACGAGGAAGATGATAGCGAACACGAACAGGAGGTGGAGGAAGGGCGCG  
ACCCGGTTGAACTCGACGACGAGATCATAGAGGCCATGCGATTTGTAACCCACCGCCTGAAGCACCGGTGAACAAAACAAA  
CCGGGAAAAGTACAGCTGCCCGGTGTGTCATATCAATCTCTGGGGTAAACCGGGGATAGTGGTTTACTGTGGTGGCGAGCAC  
TGTAATAAAGCCGCGTTAGTAGTCTTAAATAAAGTCCTTTCGGACTTTATTTTTTTTCCATTTCCGAGGTCGTGATGTTAAT

GCTGTACTTCGCGGCTTCTTTTAAAACAGTTTCAGCAAGGCTTGCTGGTATCCAGACCTGAACTAATTTTAATGGTTTCGCCGTT  
CTCGGCTTTAAGAGTGGTGTCTGGTACAAATCCCAGATTCGCTTAACGGTGCTGGAAATGTTTTGCTTGGAACGGCCTACTC  
GCGTGGCTACGTCTGATGATTTCTCACCTTTGACAAGCACGGAATAGCCAATATCTGTTGTGATGTGTGCAAAGGAAGCCATT  
TGCGGCAGCAGCTGTTCCATTCTGTTTCTGAAATTCTGTTTTTCTGAGCCATCTGTGGCGCCTCCGTAGTTTTGGTTACAGAA  
AGGATATACTCAGAATAAACAGGGGTCAATACAAGTACGATTTTTATAAACTTTATTTTATTTGAGGGTGAGGCCCGGTGCGGC  
AGCAGCGCGGGCCTCGATGGTGCCGCGAAGGTGCTGGCGCCATGCTCGGATTAACATGAACCGTGAAGAACTGCGAAAC  
TTGTTTTCGCGGTTCTGAGGGGTTGACCGAGCCGCGAAGCGGCGCTGGTAAGCGATGATATGCACATATCCACAGGCATATTT  
TAAAAGGGGCACTGTTGCAAAGTTAGCGATGAGGCAGCCTTTTGTCTTATTCAAAGGCCTTACATTTCAAAAACCTCTGCTTA  
CCAGGCGCATTTGCCCCAGGGGATCACCATAATAAAATGCTGAGGCCTGGCCTTTGCGTAGTGCACGCATCACCTCAATACCT  
TTGATGGTGGCGTAAGCCGTCTTCATGGATTTAAATCCCAGCGTGGCGCCGATTATCCGTTTCAGTTTGCCATGATCGCATTCA  
ATCACGTTGTTCCGGTACTTAATCTGTCGGTGTCAACGTCAGACGGGCACCGGCCTTCGCGTTTGAGCAGAGCAAGCGCGC  
GACCATAGGCGGGCGCTTTATCCGTGTTGATGAATCGCGGGATCTGCCACTTCTTCACGTTGTTGAGGATTTTACCCAGAAAC  
CGGTATGCAGCTTTGCTGTTACGACGGGAGGAGAGATAAAAATCGACAGTGCGGCCCCGGCTGTCGACGGCCCCGGTACAGA  
TACGCCAGCGGCCATTGACCTTACGTAGGTTTCATCCATGTGCCACGGGCAAAGATCGGAAGGGTTACGCCAGTACCAGC  
GCAGCCGTTTTTCCATTTAGGCGCATAACGCTGAACCCAGCGGTAAATCGTGGAGTGATCGACATTTCACTCCGCGTTCAGCC  
AGCATCTCTGCAGCTCACGGTAACTGATGCCGATTTGTCAGTACCAGCGTACGGCCACAGAATGATGTCACGCTGAAAATG  
CCGGCCTTTGAATGGGTTTCATGTGCAGCTCCATCAGCAAAAGGGGATGATAAGTTTATCACCACCGACTATTTGCAACAGTGC  
CGGTCGCCGGGAGTCAGCAGATCGACGTCAACGCCGAGCAGCGATTTAGTTCTTCTTCAAATCGCCCAAGTCCAACAACG  
TGGCACCGGGCAGCGCATCGACCAACAGGTCGAGGTCGCTGCCATCCGGTTCGGTGCATGCAGCACCGAGCCGAAGACG  
CGCGGGTTCGCGGCGCAAAGCGGCCTACCGCTTACGCACTGCGCTTCGCTTCATGTCAAGCACAACAGACGGTCGCATG  
CGCATCCTTTCTTATCGAAACTCGTTGAGATGATATGCAATCAAGAATAGAATTTCAAGAACTCACAAAGTAACGCGGTGGTTA  
ATATCCTGTACCCACGGATTGCCCTTAGCGCTGCCTATATCGGCTAAAGCACTCCGGTAGCTTGATTACCCACGGCCACGGC  
AGGATCTTGCCGTCGCAAGCGCCAGGGGAAAATCTTCAGCTGCAAGCCTGAGTGATTTTCATGTGCGTGTAATCCATCGCCC  
AGATGATTTTTGTGAAGAAGAAGTACGCGCTCGTTTCATGTCCGGGCGCGCTCCTGGCCCTCCGTGCCAACGGCCAGCAAGTA  
ATCGGCCTGAATTGGCAGTATCAGCGCGCTAGTAAGTCATGGATCGCCGTTGCGGCAGTCTGCGCGCCAGATTAATTACCC  
GGTCAACTTCAGTTTATCCTGCTTGCCTTGTGCGTCTGCTCCATCAGATTTTCATGGCCCCCTTCTTCATGCTCATGCTCATGG  
GTGTGTTCTTTTCCGGTATGGCTCTGTTCCGCCTGAGACGTCTGCGGCATGGCGTAATCGTCGTAAATGCTGCTGTCAAAGTGC  
TAGTCTGATGCTTCGGCATAATGCTCGTAATCGGCATACTCCTGCGCGCTCCACTGCTGATCGTCCGGCAGCAGCATAATCATGG  
GCCAGCTCTGCATCATTTTGTGTGCTTCATGACCCGCGAGCCAACGGAATCATCCATAGGGTTCTGCTTAAGATGAAAGGC  
GTCCTCTGCGTTGCTCACCGGCTGATAATCAGTGCCGTTGTCATGTTATGTTTCATCGGGTTTCTGGTTAAACGCCATGCTTTCC  
CCCGTGGCTTCTGGCAGACCTTTTTTTCAGCTGATCGGGTTTCTAAACTGGTATCGCGGCCAATATCCTTAAACCTGGCCTCAAGC  
CAAAGAAACGGTCAATTTCTGCGGCCGTGGTTTTTGGGCTGTCGCGGCTCACGCTCGATGCCAAAGATTTTTTATCGTCGGT  
AAAAATTTCCACCTCATGACGCGCACGCGAAATACCAACATAAAAAACGTCCTTAGAAGTGGTAAGCGATTTGGTATCTATGTT  
GAACAACACGCGATCACAGGTAAGCCCTTGGGATTTGTGGACGGTGGTTGCATAAGCATAGGAAAGATAAGAAGCCTGTTTT  
TTGTCCAGCTCAACCGTGCGCCCTTTTTTGTCTCAAGCGTCAGTTTTTACCCTCCACGGTTTTTACCCTGAAGCGGTCCGCC  
GTTGGCAACGTCCAGCGTTTTTATCGTTACGCGTTACCATAACCTTATCGCCCCGCGCCAGTTCCGGCGCTGACTGCCTGGTATAC  
AGACAGCTTGGTGTGTGTACGCGGGCTGAAAGCGATCTGCTCACCGCTGCTGCTTTCAACCGTCAATTTGTTGCCCGGCCCG  
GTATCAAGAACCTGGTAAGACTCGCCCCGTTTCATACCATTTTTGTAATCCTGTTCCGGGGATAATGATTTGCCCTTTACTGAAAT  
AACGGCTGTCGCGGCGTTCGCCTGTGTGAATCCACGCGGTCAAGTAGCGTGAACGTTTCGCCGTTCCGGCAAGCCCCA  
GATTGCCCGGATGTAGTCATTGAGGGTTTTGCGTGAGGCGTTCGTACCAGAGATTATCAGGGTGGCATCCTGTTGTTCTGAG  
GACAGAGACAGGTAGCGATCGGCAAGTTGAGCGAGTCGGGGCGCTTCTTCTTTCAGTTTCGTTTACGCCGGTGATATTTTTCA  
GGGCGCGCGCGGCATTACCTTACGCGGCATACTTAACCGCCTCAAGCAAAACTTCATTTCTGTGCTGAATGTCTTTTCATGT  
AGCTGGTCTGCATATCTGCTTTAATCAGCTGCTCAAAGGCTTACCGGCTTCTACCCTTTCGTTCTGTGACGATCCCCAGGA  
ATACCGCGCGAGCGTTATGCTTCTCGATCACCTCCATCAGCTGTTTCATCTGTGCGGGCGGGTATAACCCCGGCTTCATCAATGA  
ATACGACTGATTTTTTCATCCAGCTTTTTATCCTTCGCTTTGAGGAAAGCGGCAACGGTGCGGGCCGGTAATCCATCATCTTCAA  
GCGCTTTTTTCTGTGTCCCATAGGGGGCCAGCGCCGTGACCTTACGCCCTTGTGACTCCAGCAGCTCTTTAGCGGCCATCGTC

ATATAGCTTTTACCGGTACCGGCGTAACCATGTGCGGCGACAAACCGATCTTTGCTCGTCACAATTTCTGTAACCGCGCGCATC  
TGCTCCTTCTTGAGGGTTTTCCCGGCAAGCAGCTGGCCTGCAATCTCTGCGGTGAGCTGTCGCGGCATCTGCCCCGGCCGC  
GTGATTCGATAGTCAGAATGGAACGCTCAAGGCGAATACCCTCCACGGTAGTGACGCGGTGGCTGGTCTTTTAAAGCCTGCC  
GTTTTAATACCATCATCTACCGCAAACGGGCTTTATCCGCACGCATCCCCTATTGTCAGCGAGTCGATCCACTCTTTGCGC  
GTCAGAGTTTTCGGCCATAACTGAAGCACCGACCTTCAGAGTTGATTGATACCGGGCTTCGCCCTCGATGATGGCGCCCTTCTG  
TACCGCCTTCAGGTACGCTTTTTCAACATCGGCTATTGTGGCATGGCCCAGCACCTGCTTATTAGCGATTTGAATCAGCTTCTG  
GCGTTCAAAGCTGGCATCGCGCTCTGACAGCGACTTAACTGCAAACCTGGATAGCCCGGTGAGCTTTAACCTCCGGGCTGGTA  
AAATCCGGGGCCATGTTGCGCGCTATATCAGCCTCCAGAGGTTTACCGTGTCCCTGCCATTACGGTTATCAAATCAATGCCG  
AGCGTTTTGCGCGGCTGGCCATTCTGGTGAATTTCTTACGGGAATGCTCTGTTTTCTTTTACGCGTAGCCATCGAGAC  
GCGGCTTTTCGTCTGAGCATCGGCGTTTTCCCGCGTCAGACCCATTGCAGCGAGTCCCTTTTCAATTTGCTCCGACCGGCGG  
GAAAAAGCGGAATCTGTTTCATCTGAAAAATGGGCCATATCGAACGTGTTATTTTTGCTGTTGTAACGCAGCTCATAACCGGCT  
TTGGTCAACTCCAACGCCAGCTCCTGTTTGTAAACATCGCCAGGTGCATTTTGTACGCATCAGCTCATATTTTGGAGCGCG  
CGCCACTGGCCGCTCTCGCGCTGGGTGATGTTTCATGACAAAAGCGTGTGTGTGCAAATCAGGATCTAGCGCCCTGGAAGTTT  
CGTGGCGGAAAGTAGCGACGACAAGGTTATTGGTATTCTGGGTTACTGATTTCCCTGGCGAGTCGTCCGGCCTGCGCGAG  
TTTTTCAGCTTACGCACAGCAGCGGCAACAGCTTTTTTCATGAGCCTCGATAATGGTTTTATCGCCGTGTATCAGCGCCTGCAT  
GGATAACCCCTTAGGCGCTGAAAACGTCAGGTGCTAGCCAGACGCTCTTTTTTGGCATACCCACGTGTCGCTGCATATGCG  
TGAAGGTATCTATCTCCGACAAGCAGCTCTTAAACCGGGCTGATTCAACGTCCCCGGATAAGCCGAGGGCTTCAGCTCCG  
GTTCCCTGCCAGGACGTGAATGATGAATCCTTACTGTAGTAATCATCTTTGCATCAGAGTAGTAGCCACAACGCTAGTGACG  
TTCTGGCGGTAATCGTGGTTATATCAAGCATCAGATCTCCCTCAGTTCAATGCCAGGAACAGGGTTTTTGGCATGGTATTTAA  
CGTGTTTAGCCTTGAAGTTAGCGACGGGCATATCACCAGGCAACGCCAGATAGCCGGTGAGGTTTTGGCAACATTGATATTTCC  
GTAGGCGTTACGGCACGAACAACCTTAAACGTGCGGCGTTTTACGGACAATCCAGGGCTTCTGAGGATCGGATTCTTTACGCT  
CAACTTCGCTTCTATCTACCGAGTGAGCGCGACATTTGATCCAACGTTTCATCACCAGACGGCTGCCGCCAGCACGATG  
TTAGAACGCATGTTAGCCAGAATTGTCTGAGCCATATCCCGACCATAAACCTTAAACAGCTGAGAATAGGTTTGATAGCCAGCA  
TAAACACACAGACCGCTTTTACGCCCTTTGGTCAGTGCATCGTTGAGGTTTGGCAGAACTGGAGTGATTCCAGCTCGTCAAT  
AAATACATTAATGCGGCTTTCTTTTTACCCATAACCAGCACGATAGAAAAATCGAATCCAGCCAGCAGGAAATTAGCGGATT  
AAGTGACCTTTTCAATTTCTTCTGCCAGGTGATAAACAGGGTTCCCGGCTTTCCATCATCAAGCCAGTCACGCAGGGAAAAAT  
TACCTTCCGGCATTTTCAAATGTGGGGCAAGATTCTTACTGAGAACAATCGCGCGCTTCCAACCTGCTTTTTTACAGACCCGGAA  
AAAAATAGCTTCGGCAGGCGTCCCCATTAATAATTCTTTTAAATTTTTTCTGGTCAACGTTACAGGGCCAGTGAATAACTTCTTCC  
ATAGTTACTGTGCTGTATAGGCTGTGAAGTTTTTTCGAACTTCACTAAAAATAAGACGGCCATAGCCGAACCATTCTTCAGTA  
GCCATATCAGGGCTTTCTGAACAATAGAGTTCACTAAACGCTCGTAATCATATGAACGGCGAATTTCAATTGAAAAACACCCAG  
CCTTCAGTGCGTTTATCATAGGCGTTTTAAATAACATCGCCGGGACGATAGAAATCTTTAAGAACCCCCCATTGATCTAAA  
GCAATATTTTTGCCGCTTAATGATGCTCTTAAATAACAGTTTATTGAAAATTGTGGTTTTACCAGTACCGGTTGTACCGGCAA  
TCGAAAAATGCAAGTTCTCAGCGTATGTAGGTATGGGGATATTAGCCACGGTTAACTGGTTGACACCTCTTTCGCGTGTTTTAT  
CAGCGAGTGTCTGGCGCGAACAAGCTCTGTACCAGATAAATCTTTTTGAATCTTTCGCTTTAAACACGCGTGATTATCAT  
AAATGATAAAAGCGATCAGACCGCCAACACCAATAAACAGCCAGCAATTAAGCTGACCATAAAGGCCATAGCGAAAAAGT  
ATTCTTAACCAGATACGGAATCAGGTATTTAGCCGTGGATGGATCAATACCGTAGGTAATTTTGCAACTAGAAACCATAACCATC  
ACTGGAGGCAAAGTAATTGCAAATAAAAATGCTAAGCCTCTTCTCTATCGTCCATTTACAGCGCTCCTTTTTTGGTCCCAGAC  
TTTGTAGCCGTTACGTTCAACCTCTGCTTTTGGCGCTTTGGTTTTGCCCGTCTGCTATCGAGCGCAGGAGGATTAGCGTTTC  
AATAGCGAGTGATTCATGCAACATCATCTGTCTGCCGGTGGGAATTTTACGCCAGATAGCGTTTTCGGTTATTGCCTTCAGCTC  
ATCGCGCAGTGGGCCAAAATCCGCATCTGAAGCACGGTCAAAAAGATAATCCAGTTTTCGATTTACGTCGCTCAGCCGGTCG  
GCAACTATTTTCAACCCGACTCCCGATCACCTGGGCCAGCTTCAATGCAGCGCCGAGATAATCTGACCGATTACCTCCTGA  
AACCAGGTCTATATAGGCCAAAAGTTCATCTGATACTTTTTGCGGTTATTATTGGCATTTCAGTCCCTCACATTGTGCATTTCTTAAAC  
AAAAAATTGGGATCTAACAAGCTGAAATCTTAGTATTACCAAAGTAATAAAGCAAACCTATTATAAACAATGGGTTATTGGGT  
GTTTTAATACCTAATTATTACCGAATATTGACGCTATTTATTTTTTATCTTTTAAATCAGTACGATAGCGTGATTATCGCGCTGC  
GTTAGGTGTATAGCAGGTTAAGGAAAAAAATCATCTTTTTTGGTAGGAGCGACCTCCGTAGGTTAAGGGTCATTTGGCTAAA  
AAGCGTCTATTCTTTGATGGTCATGCTTGCATGACCATCTGAGCAACCAAAAACCTACAGATAAACTACAGAGAACTACAGAT

AAACTACAAAAACGATTTACCTTAGCGTTGTCAGACTACTAATAGACTACAAGGAACTACAAAGAACTACAAAGAACTA  
CAAAGAACTACAAATAGACTACTAAAACCGTGGCAGACTACTAATAGACTACAAGAAACTACAAATAAACTACAAA  
ACTGGATTGACCCCTTCTTACGAGTGTGTTAGAGTCATCTTCATACAACGGAGGGGGTTATGAATAAACAGCAGATCTGAA  
ACCCCGCAACTTATCGGCTGCTGTCAGATTGCGCCTAAATGAAATCGAGAAGTGGCTGGACAGAGGGCTAACCGGCGCATGAA  
ATTGCTGAAATCCTCGACAGCGAATACAGCTTTTTCGGTAACAGCCAAAGGGCTTGAGATGGCACTGTATAGAACCGGCA  
AAAACCGA AAAAATGTATTGCACAATACACATGATAAGAGTAGCGCGAAGGGTGCAGCGGAAAGTGATTGCACAATACACA  
ACCGTCTGAGCCTGAAGCGCAGGAAAGTGAAAAAGCAGAGAGTCCCGGCATTATTGATAAAGAGTTCTTCAATAAAATCGGTG  
AGGATTTCAACCCTAAGAAGTTCAACAAAAAATTTCTGAGGTGATTTATGAAAGTAGCGGTAATTAATTACAGTGGCAGTGT  
TGGTAAAACATTAATTTTCATCTTACCTGTTAGCCCCGCGCCTGACTGGTGCAAAGTTCTATGCGGTAGAGACTATCAACC  
AGTCTGCTTCCGATCTGGGTATTGAAAATGTGACCAAGTTTTAAAGGTGACGACTTCTCACGTTTGATTGAGGATATTGTT  
TTTTGAAGATGCAGGCAT TATTGATATTGGCGCTCAAACGTTGAAGCGTTCCTGATGGCTATGTCTCGCTTTGACAGTGG  
CGGAACGAATTTGATAAATATGTAATCCCGGTGACGCCGGATAATAAGGCGATTGATGAAAGCCTGAAAACGGCACACAC  
GTTAAGTAAAGCGGGCGTGAGCAGCAAGAAAATTATCTTTGTTCCAAACCGTATTAGTCCAGACAGTGAAGTAGAAGATGT  
GCTGGCGCCGGTGTGTTG TCAAAGAAACGAAGATTGGCAAAATAAGCAAGAAGGCTGTTATTTATAACAGTGAGGTTTT  
CGAATATCTGGCGTTTCACCGTATCTCATTTCGAAGTATTGACCGCTGAAGATCCAGAAGAATTCAAATCCCGTGCAAA  
ACAAACAACCGATGCTGACGAGCGCAAAAACTGGCACGCCGTTATACATACATGAAACAGGCGATTCCGGTAAAAGCTA  
ATCTCGATAAAGCATATGCGGCTTTAATGGAGAATAAAATGGAAAAGCAGCCGGATAAATTAGAAGTTCTGATGGACTG  
GTTTTTAGGTGACCGGAAGGAAATCACCGCAACTCAGAAAAGAAATGACGCAGAACTTTCTGAGCTTTCCGAAAAGCT  
GGCAAAAGACACCGAAAGTTTAGGAGAGACGGCAGACTCTTTTAAACGGGCTTTAGTAGAAAACCGAGCTTCAATTAG  
CCTGGCAATTAGTGATGCTAAGGCGCGGAGGAA TTTCTAACTAAATTCGCGCGCGCAGGCGTCCAGTGCTGAGACG  
TTTTACCCGTCAGATCCTTTTTATTACAGCTGGCTGCACCATCGTGGGCGCCGAGTAGGGCGCCGATAGCGATACTTT  
TACTGAGATAAAGCAAACCGGGCGTGTCCCGGTTTTTTTGTCAAGCGGAGCGGAGGCCGAGGATAGTGGCCGCCG  
CCCCGCGTAAGCGGGGCGAGACGGGAACCGGCTCGAAGCGCAGCACGGCAGAACCGGCCCGCAGGGGCAATGCCCG  
TTTTAATTCATCGTGACAGTCGCGCGTGACCATCACGGGAGAGAAAATAATGAATGACCGACAGCGAGAAGTGGCCCG  
TATACGCCAGGCCCGCCGCGCGGCTCAAGGAAGAAGGCACAAGCGTGACAGTCACGCTAACAAAACAGGAAGAAGCA  
ATGTTGCAGGAGCTGTGCCGGTTCGCCGCTCTGGACGACGCCTTATTCAACGAACGAATTTTTCCAGCTGCTGCTT  
ATCCGCAACTGGCAGCAGTGGCAGGAGCAGAAGGCACAGCTGGAAAATGCCAGGCTTGCGGAAAGCTGAAAGCGG  
AGGGGGTGCAGGGTGAACGGAAAGGCGAAACCTTTAACTGCTGCTTGCCGTCGAAGCCAATGAACTAAATTTGT  
AGTGTATTGTGCAATACACATTTACACAGAAAACAAAACCGGCAATTCCTGGAACCGGATACCTACGGCTATT  
CCTGGGTGAACGGTACTTTTTGCACCTGGGTGCGCTGAAAAAGCTGAATATGCAGGGTGACGTTTCGCGTGCT  
GTTCTGCTTTGTAGACTGAATGCGCCAGCTATACGCCTGACTGCTTAAACCTGGTAAAGTTCTGCAACCGG  
CACTGACCGGAAAGCAAGGCAGGGAAGACCTAAGCCAGAAACCTTACTGCTCCCCGCCCTTCAGGGCGGGGATTGCG  
GATCATGTTCTTCTTTTACAGGATTCAACGCAGACAAGAAAGGCTTTCAATTTCTATACGTGAACGGCCGCGCAG  
CGGAAGAAACAAGCCCCGGTCAATCCGGGCTGTTTTCTTTAGGCGGCTCAGAAATCGCCTAAAGGCCCGGCTTGG  
CCGGCAGTCAGT GCTATTTAGTTTTGTTGCAGCAGCTGGCTTAATTTGCCGCCAGTGATACGTGATTGGAAAGCG  
CCTTGCAAGGCGTGTTGACGCTTCGAGGCAGGCGCGCAGCAATAATCTTTCTGAGATTGCACTTCTTTTTT  
CAGTTGGGAAGGGTGGTAAGTGTAGTCATGCTTGCTCCTTAGTGAGCCGATATCGGCAATTTTTCGGGTGGCGGT  
GTTGCCTCCCGATGATTTAATATCGGTGATTATGCTTTTTAAAGTCAATACAGGTACGGAATTTATTTACCTG  
TTTTTATGCCCGTCAGGGCATGGAAGGCGACCGCGCCGACTCCACCGGACACCGGCCGCAAATCGCCGGAA  
ACTGCGGGACTGACCGGAGCAACAGGCCAACCCCCCTCCCTGCTAAGCCATAACCCAGCCCGCCGACG  
CAGCTGCCGCAGTCCCCACGGGGTGCAGTGGGCGCCGCGCGCTGCGGGTACGGCGGCCCGCTGCGGGT  
CGCGGGTACGGCGGCCCGCTGCGGGTGCAGGTTAGCGGCCCGCGCGGCCGGTTACGGGGGACACCG  
CACAGTCACGGCCAGTGGCCGCTGAGCTGCACAATCCACGATAACACAATAGCGCACTGGCAAAGGATG  
CCGACGCCTGAAGGGCGTGGGCACCCCGAAGGGGCGGGGCGGCCGCTTGCAGGCCGGGCGAGTCCGGCGC  
AGGGTGTGGCCTGCCAAGCGGAGCGCGGAGGCCGAAGGCCGGAGGCGTTAGCGGCCGCTGCCCGCGTAA  
AGCGGGGCGAGACGGGAACCGGCTCGATGCGCAGCACAGGACCCCGAAGGGGTAACGCCCGGTGTGGC  
ATCAGGATTTAGTGAATGGCAGAACATGAGCTGGAGAGATCACCGGCAAGCAGCAGCAAAGGGGCGGC  
ACAGCCCGGATGGCTGTTTGCCGATACCGGCGATTAATGAGCGGTGTTAATATCCCCGCGTTGCGGGG  
GACTAGGTTTTCAGCAAGTCATGTTAAATACGTGTCCATCATGTAACCTGAA

ATCCCCAATAAACAGATCCCGCGCATAGGCTACGATGTCAAATATCGGGGCTACGGATTCCGGAATATCATTAGTAGACCGCT  
ATCATTAGGTATTCTCTGCAAAAGTTTCTTCGTCCTTAGCTTCGCCATATAGGCATCTCTAAACAGGTGCAAATCAGTGCTA  
TAAACAGATCAACAAAGGCCACAAACGCCGCTTCGTTACCTTCTCGCGGGCTTGTTTAAAGCCGTTAATAAAATCCCAGTT  
GATATGGCACTCTGACGCCATAACAGACGGAATACCCTCCCAATCTTGGAACATAAATTCTGGATCAGCCTCATTGCGTGTA  
CTCGCGGCAGCGCTCGTAAACTCCTCTGAGCTATCAAATCGGTGAGATCGAGCCAGGCTCCCGCAATGCTTCCGCAGTTGT  
ATTTATGGTAAGTGCCAACATAAACAGAAGGGGTGCGTAATATCAGTCATGGTGTACTCCTTAAAGCGCCGATACCGGCAATTT  
TCGGGCGGCGGTATTGCCTCCCGATGATTTAATTATCGTTGATTATGCTTTTAAAGTCAATACAGATACGGAATTTATTTACCTGT  
TTTTATGCCCGTCAGGGCATGGAAGGCGACCGCGCCGACTCCACCGGACACCGGCCGCAAATCGCCGGAAACTGCGGGAC  
TGACCGGAGCAACAGGCCAACCCCTCCCTGCTAAGCCATAACCCAGCCCGCCGACGCAGCTGCCGCAGTCCCCCAG  
GGGTGCGCAGTGGGCGCCGCGCCTGCGCGGGTACGGCGGCCCGCCTGCGGGTCGCGGCGCCGTACTGCGAGTTA  
GCGGCCGCGCGCGGGTACGGGGGACACCGCACCGTCACGGCCAGCGCCCCGCTGAGCTGCACAATCCACGGATAA  
CACAATAGCGCACTGGCAAAGGATGCCGACGCTGAAGGGCGTTGGCACCCCGAAGGGGCGGGGCGGCCGCTTGCAGCC  
GGGCGAGTCCGGCGCAGGGTGTGGCCTGCCAAGCGGAGCGCGGAGGCCGAAGGCCGAGGCGTTAGCGGCCGCTGCC  
GCGTAAGCGGGGCGAGACGGGAACCGGCTCGATGCGCAGCACAGCAGAGCGGCCCGAAGGGGTAACGCCCTGTGTGGC  
ATCAGGATTTAGCACAATGTCAGAACATAAACTGGAGAGATCACCGCAAGCAGCAGCAAAGGGGCGGCACAGCCGCCCG  
ATGGCTGTTACTTGTCTTGTGCGTAGCACTTTGATTAGGCCGTTACGGCCGTAATCAGAGCGGCCAGCGAGGTGATGATT  
TGCGGTAGTTTTTCGAGGATGGTAGAGGTCATATAGCACCTGTAGAGAAGTTGGCGGGGTGTCGTTTTCCGACGGCCGCACT  
GTAACCGGGCGAATAAGGCAGGTTGTCAACAGCTTGAGCGAAGCGTCTGTTGACAACTGCCGCGCCCGGTTTCACTGCGG  
TCATAGGCGGAACGACCCACGCCAACGGAACGGCTTTATGACCGGGCAGCTGAGATACCGGCGAACCTGGCTGGCGGCTGA  
CGCCAGCCGCCAAGCGCCAGCGCGGAGGGCAAAGCCCGGAGGCCAAGCGGAGCGCGGAGGCCGAAGGCCGAGGCCG  
GAGGCGTTAGCGGCCGCTGCCGCGTAAGCGGGGCGAGACGGGAACCGGCTCGATGCGCAGCACAGCAGAGCGGCCCG  
AAGGGGTAACGCCCGAGTCTGCCGCTGTTTATCTCTCGTTCCATCTGAAATCGGCGGTAAGGCCATTAAAGGGTCAGTTTA  
TCAGGGAGGCGTTAGCCCCCATGTTGTTAATCATCAGGCAATATCGTCTTGTAGCAGGCATAACCGAAGCTAAGCTCTGTT  
TCATATAGTGGCGGGCAAAGTCCCAGGCATCGTGGCCGAAGTCTCATAATCTGCCAGGACGATTTTCGCGGGCTTTGTGCCAT  
TGCTGTACGGAAGAAAGCGGCAGAACAGGGCAGGGGTGCGACCAGTCAGTGACGGTGTGTCAGATCATATCTGCCAGACG  
CTCCAGGGAGCCGTAAACCAGCTCTGTGCGCAGATCCGCCACCATGCGTTGTTTACGCAGTGATGCCAGATAATCAATCTTT  
TGTTTATATCAGAATTTAAGCGGGTCTGGTAATCCATGATGTACTCCTTTGCGCGCCGATAACCGGCAATTTTTCGCGGGCGACGGT  
GTTGCTCCCGATGATTTAATTATCGGTGATTATGCCCTCAAAGTCAATATAAGTACGGAATATGCATGCATAATTTTATATCTTGC  
AAAGCGTTCATAGAGTGCCTGAATCGCTTTCTGACAGCCTCAATAAAAAAAGGCGGGGATTCCCGCCTTTTTTCTTACAGCTG  
CTTACGTGGCTTTTTACGCGTCATATAAACGGTATCGCGCAGTCTACCGCGTACAAAAGCACGCCAGCGCGCCGCAACCGT  
ACAGAAACGCAAGCGGCTTATTATCGAAGTAGCTGAAAACCCCTGTGCGCCGACACAGGCCCAGAACAGAGACGCAGGCGC  
AGGTGATCTGCACCAGATCCCTGTATCCCGCACGAACGATAAACCAGGGCAGGGCAAGCGCAGCGGCGCTAATAATTAATGC  
GAGAGGGACAAAAACGAGATAGTGATACATGTGAACTCCTTGATGGTTGCCGATAACCGGCGATTGTTTCGGGCGGCGGTATTG  
CCACCCGATGATTTAATTAGAGGTTTTGCGCGTCCAGGAGATTGACCTGAGCCGGGGTAACGTGAAACTTTTCCCTTTATGG  
ATCACGTTATGCGGGGCGCTAATTTCACTGATAAAGCTAACCGGGTAACGTTTTTTACCAGCAATCCGCTCGCTAAACCAT  
GCCACTTTTTCGCGTGGCCGATCCACTGGATGAACAATCACACCGGCCATGCTGCAACCCGTTGCGGGTTCGTCCAGCGTAAT  
GCTTACCGGGACTGTATCCCGGTAAAAAACTTAACCGGCGGCACACCTGCCTGCGTAGCGGCTGCGACAACCTGCAAGCCCG  
ATAACCGCTATCCGATTAATAAGCATTATTTCCCTTACTCATGCTGATACACCTTGCCAGCTGTTACCAGTTTACGAAATTC  
CTTTCATGAATTTACGCCCATGCTCAAGCGTTGAATACAGTTGCCGATAAGCCAGTTACCAGCCGTTTTTGTCTCGGTATACC  
ACCATGCTTCTGTCAGAGTAAGCAGCGGTTGCTATCCTCGCCCTTCTCATAGATCCAGATTTTAGTGACGCTTTTACCAGTTTC  
GTTGCTGCCCTGAATGGTAGGGTCAAAGGTATGTTCAATCTCTATATCGAAGTAACGCTGAAGGAAGTTAGTAAAGTGCATGA  
CGACTCCTGTAAGCGCCGATAACCGCAATTTTTCGGGTGCGGGTGTGCGCTCCCGATGATTTAATTATCGTTGATTATGCTTTTA  
AAGTCAATACAGGTACGGAATTTATTTACCTGTTTTTATGCCCGTCAGGGCATGGAAGGCGACCGCGCCGACTCCACCGGAC  
ACCGGCCGCAAATCGCCGGAAACTGCGGGACTGACCGGAGCAACAGGCCAACCCCTCCCTGCTAAGCCATAACCCAGCC  
CGCCGCCACGCAGCTGCCGCAGTCCCCACGGGGTGCAGTGGGCGCCGCGCCTGCGCGGGGTACGGCGGCCCG  
CCTGCGGGTTCGCGGCGCCGTACTGCGAGTTAGCGGCCGCCGCGCGGGCGTTACGGGGGACACCGCACCGTCACGGCCAG



CGCCCCACTGAGCTGCACAATCCACGGATAATGCAGGAGACGAATCATGATAGGAGGCTGAAGGGGAAATGAGCGGCAGCA  
GGGGAAGGGGTTGCCAAGCGGAGCGCGGAGGCCGAGGCCGAGGGCGTCAGTGGCAGCTGCCCGCGTGAGCGGGGCGA  
GACGCGTAGCGGCTCGATGCGCAGCACAGCAGAACGGCCCCGGAGGGGTGACGTCCGGGGGTTGCTTTTTAAAGATTTTC  
GACCACATCAGTAAATCGTAGTGACACCATGAAGCAAAAAGTATCGTGACAGCAGAAATCAACAACAGTAACAGCAGACCTTT  
TTTTCGACGTAATAAAACCGGCCCAAAGCGCCCGCAAGAAGCACACTCAACACGATTTCCGTTATACTAATCGTATTCATAAT  
CTCTCACGTTTCCCTTTTTAGAACTCTGCCACACACAGATAAAACCTTATAACAAGCTACAAAACCCGTTATTCAGACGCGGTA  
ATGCCTAGTTTTTTGCCAGTATTCAGATGACAAAGAAACCCTTATCCACTTCCCGGTTACAAGGTGAATGATTGTGGCTTCA  
TGCCCTTTAACAGAGTGGGATATTAACCTCACGCTGAATGATATGCGTCTCTCCATCATTCCCGTCACGGCAATTAGGCCCTCTG  
TAGAACAGGGGTTGATACTACTAATGTTGGTGTGTTTTCGGTTTTGTTGAGCATCGCTGATCCTCAAATATCGGTTTGTGTTAC  
GTCTGCCGCTTTGCGCTGGATAAAGCGACTTAAAGAAATCCGACGCCTTCAGAATATCGCTATCCTGGAAGTCGGGAAATGTCG  
CTTCTGTCAGCTCCTGCGCCGTACCTGCCCGTATAACGGTTTTATCGCGGATCATCGTTGCTTAACGCCATCAGCCTGTTTTTT  
GCTGAAGGAGTGCCGAAAATAATCGCGTATTGGCCGCGCTATCCTGATGAACAGAAGTATCCAGCGATGATTACCTGTT  
TACGATAGTGGTGATAGATTTGCTGGCCGTAGCGCTCCTGATCGGAATTACGGTAATCGAACATTAACAGTTCCAAAAGCATT  
ACCGATCTGGCAATTGCCAGGCGGTAGGGTGTGAAGTGTGCTAACATAGTTCCCTGAGCGTGACAGTCACGATAAGGC  
GGGCTTTGCCCGCCTGTTATCAGTTAATCAATGGCACGATAAATACGATTCTGGCTTTGCTTCTCCAGCGTATTAACGTACTCC  
CGAACAGGTGATACCGGTTAGCCATCGTTTCGTTGATTCGGCTTTGCTTCTCATATGCCAGGCCGAAAAGTAACTGTA  
GGCATAACAGACAAACAATAATCCCTACTTCGCGCGCGCTGCATTCACCTTCAAATAGTTAGGTAACGAGAGCCAAAGAGGTT  
GGGGCGCTTCATAAAAAACGCGCCATTGCTGGCCTGAAGGTATCCCAATACCCTCCCTGGTAGTCTTTAGCGTAACGATTC  
AGAAAGGACTGAATGAAGTATCTGCGCTGAAGAAAGCGCCACGAAATGCCGACGGCATGAAGTTCATGCGGGCGTTTTCA  
GAAATGTAGCGGGCGGTGATTTGATAGTTTCCATGATACTTCTCTTAAAGCCGATACCGGCGATGGTTAAGCGGCAGGCAC  
ATCACCTGCCACTTTTTAATTATCGTACAATGGGGCGTTAAAGTCAATATAAGTACGGATTATATTTACCTAATTTTATGCCCGTC  
AGAGCATGGAAGGCGACCTCGCCGACTCCACCGGACACCGGGGGCAAATCGCCGAAACTGCGGGACTGACCGGAGCG  
ACAGGCCACCCCTCCCTGCTAGCCCGCCGACGCGGCCGTTACAGGGGACACTGAGAAAACAGAAAGCCAACAAC  
ACTATATATAGCGTTGTTGGCAGCTGAAGCAGCACTACATATAGTAGAGTACCTGTAAAACCTGCCAACCTGACCATAACAGC  
GATACTGTATAAGTAAACAGTGATTTGGAAGATCGCTATGAAGTTCGATATTTTTGAAAGCTCCGGCGCCAGCCGGGTACACA  
GCATCCCTTTTTATCTGCAAAGAATTTCTGCGGGGTTCCCGAGCCCGGCCAGGGCTATGAAAAGCAGGAGTTAAACCTGCAT  
GAGTATTGTGTTGTCACCCCTCAGCAACTTACTTCTACGGGTTTCTGGCTCGTCAATGGAAGATGGCCGCATCCATGATGGT  
GACGTAAGTGGTTGTGGATCGCTCGCTGACGGCCAGCCACGGCTCAATCGTAGTCGCCTGCATCCATAATGAATTTACCGTGAA  
GCGGCTACTGCTGAGGCCAGACCCTGCCTGATGCCGATGAACAAAGATTTTCTGTGTACTACATTGACCCGGATAATGAGA  
GCGTTGAAATCTGGGGAGTGGTTACGCATTCCCTTATCGAGCATCCGGTATGTTTGCCTGATTGATGTCAATGGCATGTACGC  
CAGCTGTGAGCAGGCATTTAGGCCAGATCTGGCAAACCGAGCAGTGGCCGTTTTATCCAACAATGACGGCAACATTGTGGCC  
CGTAATTACCTGGCGAAGAAAGCGGGCCTGAAAATGGGCGATCCGTACTCAAAGTCAGACCATAATCGAGCGTCATAACAT  
CGTATTTTTAGCTCTAATTACACTCTCTATGCCTCCATGTGCGCCCGTTTCGCGCCGTAGTTGAGTCCCTTGCAAGCCACGTC  
GAACAGTATTCAATCGACGAGCTTTTTGTTGACTGCAAAGGGATAACGGCCGCCATGAGCCTTGACGCTTTCGGGCGCCAAC  
TGCGCGAGGAAGTCAGGCGACACACAACGCTGGTATGCGGGGTGCGTATTGCCCGTACTAAGACGCTGGCGAAGCTGTGTA  
ACCACGCTGCAAAAACATGGCCCGCTACTGGCGGGGTGGTTGCTCTGGACGATGGCGCCAGACTGAAGAAATTAATGAGCA  
TCCTGCCGTTGCGGAAGTCTGGGGCGTCGGCCATCGTACAGAGAAAGCACTCGCCACAATGGGGATCAAAAACGGTGCTGG  
ATTTAGCCAGGGCAGATACGCGCCTAATCCGTAAAACATTCCGGCGTTGTGCTTGAAAGAACGGTACGGGAGTTGCGCGGCGA  
GGCTTGCTTACGCTGGAAGAAAACCTCCTGCGAAGCAGCAGATTGTTGTGTCGCGCTCATTCCGGCCAACGCGTAGAAACC  
CTGACGGACATGCAGCAGGCTGTCACCGGATTTGCAGCGCGCGCAGCTGAAAAACTGCGTAATGAGAGGCAATACTGCCGC  
GTCATAAGCGTCTTTATCCGTACCAGTCTTATTAGTGCCTGATACACAGTATGCCAATCAGGCAACCGAAAAACTGACGGTG  
GCAACCCAGGACAGCCGACGATAATTCAGGCAGCACAAGCCGCGCTGGCGCGGATCTGGCGGGAAAGATATTGCGTATGCA  
AAAGCAGGGGTATGCTGGCAGATTTTAGCGGGAAGGAGGCCAGCTTGATTTATCGACTCTGCTACGCCTTACGCTGGCA  
GCGAGGCTTTAATGGCTGTTCTTGATGGTATAAACCAGGCGTGGAAGAGCCAGCTTTTTTTTTGAGGCCAGGGCATCGATAA  
CTCCTTTGCCATGCGTCGTCAGATGTTGTACCTGATTACACGACAGACTGGCGCTCAATACCAATAGCCACCATCAATAATTA  
CCGGCGCCGTACACGGGCCGTTAACCCCTCAACCGGCCGAAACAAGTTTCGGCACGGTTTCGCGGTTTTCGGTAAAAGCC

GTTTCCTCTGTATAAAAGATCAGCTAAATTATGTGTATTGCACAATACATATATGTGAGGTTAGCAGTGAATTTGCCTACGCCCC  
AAACCTACGATGAACTTCAGAGAGCCTACGATTTTTTCAATGATAAGCTATTCAGCAACGAGCTGCCGCCATGCCTGATAACGT  
TGCAGCGTGAGAAGCGAACGTATGGCTATTGTTCTTTAAGCGTTTCGTCGGCCGTGAGAGTGGGTACACGGTAGACGAGAT  
CGCTATGAATCCGGTGTATTTCTCGATCAGAACCATAAAGGCCACGCTTCAACACTGGTGCATGAGATGGTTCATCAGTGGC  
AATTCCATTTTGGCGAGCCTGGCCGCCGTGGCTATCACAACAAACAGTGGGCGGCCCGGATGGAACGGGTAGGACTAATGC  
CTTCTGATACCGGCGAACCGGGAGGCAGGAAAGTGGGCCAGAGCATGACCCATTATATTATTGCCGGTGGCCCTTTCGATATG  
GCCTGTGATGAACTGCTGACAGGCCATTTCCGGCTTTCCTGGATGGACAGGTTTCCGCCTTACCAGCCTAAGCCTGGCGCTGT  
GCTAAGCCCTACAGGAAAAGGCTATATTGACGACGAGGAAGATGATAGCGAACACGAACAGGAGGTGGAGGAAGGGCGCG  
ACCCGGTTGAACTCGACGACGAGATCATAGAGGCCATGCGATTTGTAACCCACCGCCTGAAGCACCGGTGAACAAAACAAA  
CCGGGAAAAGTACAGCTGCCCGGTGTGTCATATCAATCTCTGGGGTAAACCGGGGATAGTGGTTTACTGTGGTGGCGAGCAC  
TGTAATAAAGCCGCGTTAGTAGTCTTAAATAAAGTCTTTCGGACTTTATTTTTTTTCCATTTCCGAGGTCGTGATGTTATTAAT  
GCTGTACTTCGCGGCTTCTTTTAAAACAGTTTCAGCAAGGCTTGCTGGTATCCAGACCTGAACTAATTTTAATGTTTCGCCGT  
CTCGGCTTTAAGAGTGGTGTCTGGTACAAATCCCAGATTCGCTAACGGTGTGCTGGAAATGTTTTGCTTGGAACGGCCTACTC  
GCATGGCTACGTCTGATGATTTCTCACCTTTGACAAGCACGGAATAGCCAATATCTGTTGTGATGTGTGCAAAGGAAGCCATTT  
GCGGCAGCAGCTGTTTCCATTCTGTTTCTGAAATTCTGTTTTTCTGAGCCATCTGTGGCGCCTCCGTAGTTTTTGTTACAGAAA  
GGATATACTCAGAATAAACAGGGTCAATACAAGTACGATTTTTATAAACTTTATTTTATTGAGGGTGAGGCCCGGTGCGGCA  
GCAGCGCGGGCCTCGATGGTGGCGGAAGGTGCTGGCGCCATGCTCGGATTAACATGAACCGTGAAGAACTGCGAACT  
TGTTTTCGCGTTCTGAGGGGTTGACCGAGCCGCGAAGCGGCGCTGGTAAGCGATGATATGCACATATCCACAGGCATATTTT  
TAAAAGGTATTTTATAGATTTTTTATCTTTTTTAAAGTCTTTTAGAGCTATATAACTCATTGATTTAAAATCATAATAAGTGTATCT  
CTGGGAATCCGCCACCTTGTATGGGAATTGGCCACCTTACTATGGGAAACAGCCACCTTACTATGGGAATTAGCCACCT  
TGTTATG

>pQEB1\_inv1

GGAATTGGCCACCTTAGACGAAACTGTAAAAAATGTATTTACTTGTGGTACTTTGTGGTAGTGTGGAGAGTAATTTTTAACC  
CACAAGGCAAGGCGCATGGATAAGTTGCTGAACAAAAGATAAAAAGTTAAGCAGTCTAACGAGCTTACCGAAGCTGCTTAC  
TACCTCTCGCTAAAAGCAAAGCGCGTTCTCTGGTTATGTCTTATGCAGACGTATTTACAGCTTCAGTAAGCGAAGATGATGAT  
GAGATGGCTGTACTCGGTGACTCTACTTTCAAAGTAAAGGTGGCTGACTATCAGCAAATTTTTAGGTAAGCCGTAACCAGGC  
TATCAAGGATGTTAAAGAAGGCGTGTGAGTTAAGCCGTTCTGCGGTAATCTTTTACCCGAAAGAGGGGCGTTTTGACTGC  
GTCGCGCGCCCCTGGCTAACAGAGGCTGGCAGCCGATCAGCTCGTGGTATCTGGGAAATCGAATTTAACATAAACTCCTGC  
GGTACATTTACGGCCTGACGAACCAGTTCACCACCTACTCGCTCCGCGATTGTGGCAGTCTTCGAAATCCCCGGACGATCCGC  
CTTTATGAAAGTCTTGCTCAATTCAAATCTTCAGGCTTATGGGTTACTACTCATGCTTGGTTAAATGACCGTTTCTTTTGGCCG  
AATCCCAACAGAAGAACTTGGCAGAGTTGAAACGATCTTTCCTTGATCCTGCACTCAAGCAGATAAATGAGAAAACACCTTTA  
CTTGCTAAGTATAGTATTGATGATTCAGGAAAATTTCTGTTCTCAATAATTGATAAGCAAAAATCCCGTCTGACATAAATCAGCAC  
ACATGAGCCTGTCAATTTGACAAATTTTTGTCATGAAGATGGGCGAATTTCCACACAGCACCCGGCGCCCGCAAGATGGGCGG  
ATTCCACACGACAGCGGCGCCCGCAAGATGGGCGGATTTCCACACTACAGCGGCGCCCGCAAGATGGGCGGATTTCCA  
CACGGCAGCGGCGCCCGCAAGGTGGGCGGATTTCCACACGGCAGCGGCGCCCGCAAGGTGGGCGGATTCTCACGCGG  
CAGCGGCGCCCGCAAGATGGGCGGATTTCCACACGGCAGCGGCGCCCGCAAGGTGGGCGGATTCTCACGCGGCGGCGG  
GCGCCCGCAAGGTGGGCGGATTCCACGCGGCGGCGGCGCCCGCAAGGTGGGCGGATTCCACGCGGCGGCGGCGGCGG  
CGGCAAGGTGGGCGGATTCCACGCGGCGGCGGCGCCCGTAAGGTGGGCGGATTTCCACACGGCTGCCGCGCCCGCAA  
GGTGGGCGGATTTCCACACGGCAGCGGCGCCCGCAAGGTGGGCGGATTCTCACGCGGCGGCGGCGCCCGCAAGATGG  
GCGGATTTCCACACGGCAGCGGCGCCCGCAAGGTGGGCGGATTCTCACGCGGCGGCGGCGCCCGCAAGATGGGCGGA  
TTCCACACGGCAGCGGCGCCCGCAAGGTGGGCGGATTCCACACGGCAGCCTCGCCCGCAAGGTGGGCGGATTCCCA

CACGGCAGCCTCGCCGGCAAGGTGGGCGGATTCCCACGCGGCAGCCTCGCCGGCAAGGTGGGCGGATTCCCACACGGC  
ACCGGCGTGCGGCAAGGTGGGCGGATTCCCACACGGCACCGGCGCGGGCAAGGTGGGCGGATTCCCACACGGCACCGG  
CGCCCGGCAAGGTGGGCGGATTCCCACACGGCAGCCGCGCCGGCAAGGTGGGCGGATTCCCACGCGGCAGCCTCGCCCG  
GCAAGGTGGGCGGATTCCCACGCGGCAGCCTCGCCGGCAAGGTGGGCGGATTCCCACACGGCAGCGGGCGCCGGCAAGG  
TGGGCGGATTTCCACACGGCAGCGGCGGGGCCAGTGGGATTAGGAGAATAGGTGTTTTACCGAATGCCCTGACGAGG  
CGTAAAAAACCGCTTGGCGGCGCCTCATAAAGCAGAAAACCCGCTCAAGGCGGGTTATCTGCTCTGTAGCCTGTGATGCT  
TCGCGGGCATCCGGCATAACAGCGAGGTGAAATCTTCTTTTGGCATGTTAATTATACGCTAACGCGGCATATGATCAAACCTG  
TATTAATAAGCCACTGTACCGTTTATAATGCTCTCAGATCAAAGAGGTAAGCCCGTTTAGCCGCTGTGTGATGAGCCAGTT  
CAGACTCTTCAAATCGAATTTGGTACTAAACAGGACCCGAACCGTGGGCAAGCACACGGCAACGGTATAGCCCTCTTCCGG  
TTTCGCACCCGGAAGCCTGGGCGGCAGCGTGGTGAAATCTTCTTTTGGTTAAGTGAATGGCATAACCGGATGGGCGGATTA  
GAGGAAAGGGGATTGCCTAGTAACCTACGCGCCACAGAGATGGAGGTGCGGGGAATGATTGAGCTGATTATCGCTATTCTGA  
CCTTAATTGCGGCTGTATTGCAGTTGATCAACTGGTTCTTTAATGGTGCCGGAGTCTGTGAAGGTGAAAGCCTGAACGGGC  
AAAACCTGAAAGGTTTATAGCCGTCCTTCGGGGCGGCTTTTTTTTCGGCAAATAGGGTTTTACCGAATAATGCAGAGTTTTAA  
GGTGAGAATTTGCAGACTTGGCGTTTTACCGAACATAGATACTCCCTAGGCTGATAGGTGCATTAGTTATCACCTACCTGAAC  
ATATTGTAAAAGATGTCAGTCTCCAGTGAAGTGTGTACTATCAACTGACAAGACTCTTACACGCAACGCAGGGGGATGGAGTT  
TTATGCTTAGAAAAATAATCAGGGGTAGCGGATTCACTCAGTCAGAAGAAAACTGATAGAGTTCGCTGATGATGCTTTTTTT  
GGTCTTTGGTCTTATCCTAATGTTTATAGCGATGAGGGTACTCTAAAAATAAAATTGGGAAAGAAGTTAGTGACTTATTAGTTA  
TTTTTGATAAAGATATAATAATTTTTCCGATAAAGCTATTACATACAATAAAAAACAAAGATCCTAAGGTTGCATGGCAGAGATG  
GTTAAAAAATCAGTCATACAGTCTTGCACACAGTTATTTGGCGCAGAGAAGTTTATAAAAGATCATCCCGAAAGACTTTTTGT  
TGACAAAGAATGCTCAGTTAACCTCCCATTAATAAGATAATTCTTTAATTTTCATTTGGTGCCGTCACTAATAATATTTAG  
ATCCGGCGATCTCGTACTTTGACAAAATAGAAAAAGGCAGCTCTGCTACTTTAGTTAACATATTTCTTTAAACGCCCATCAATG  
TCTAGAAAATCCATTTTGTGTCGGAGACGTTTATCCTGATAAGACTTTTGTCCATATACTTGATGAGACTGCCCTAAAACACTG  
TTAACCGAGTTAAACACAGCAACTGATTTTCATTGGCTACCTAACGAAAAAGAGAGGGTTGTAAGAGAAAGAACATTATTGG  
TCAGCGCTGGGGAAGAAGAGACTCTTGCTGCTTACATTATGGGTGATAAAACCATAATATCAAAAGAAATTATTGGAAACGAT  
CAAGGGATGACCATAACCGGAAGGTGAATGAAAAACTATAAAACCACTTTCAATTATCAATATCAGCTCTCAATGAAAAAGG  
TAGCGTTTTCTGGGATAACCTAATCCACAACCTCTCGACAAGTATATTGTGAGCTAACGTTGGTTTTTTTAGTGAAATTGAATTT  
TCTACACATGAATTAGGTGTTAGAGAATTAGCCAAAGAAAGTAGGCAATCTAGATATTACCTTTCAAAGAACTTTAAAGAGAA  
ATTAATAACAACCTCAGCCTCATCTAAGAACGTCAAGAATGGTCAATCAATCGATGAGCCTGGAAAGTTTTACTTATTCTTTTT  
TTTTCTAACGATAGCAAGTTGAGTTACTCTGATTACAGAATTCAACGTATATCTTATATAAATGCTTATGCTGAGGTTGCCTTTA  
ATAAATACAGACATATTAATAAATAAATACTATTGCAACAGAGCCGAAAATACAGAAGGAAGATCTGAAGACCTAATATATA  
GCATATCCCAGAGAAATTTACCAAAGAGCAAATGAAAAAGCCAAAAGATTATCAAGAGAATACAAAATACTAAGTGATTTT  
TTACCTACTAAAACGACAAAGAGCGATAACTTTAAATCAGTTATATCAAAGGTGAAAAAATAGGGCGGAATACACCTTGTCC  
ATGTGGCTCCGGTGTTAAATTTAAAAAGTGCCATGGTGCGAATAATTAGCATTATTGTATGTATAACGGTAATGGCGCGGCAGA  
GAAACCGGCGCGTTCTGCCCTAGTGTGGCCTGCGGGTCCCCCGCACCCGCTGTATGTAGTATCGGCAGCATCTGAGAAAA  
CCACTACATGTAGTTATCAGCGCCACAACGGCGCGGGGACGAGTGCGGTTCGAAAAAATTGGGGTTTTACCGAATCCGGCA  
AAAGATTGCTTCTATAACGTCCGCTTCTGGCACACAGCAGCCGTTAAGATGTAAGGCCTTACGCCAACTAAATCTAATGGGA  
CAGATTTAGTTGGTGATGGTCAAGTAATCTGCAAACGGTCACCAAGTAAAATGCAAATGGGTAGTCAAGTCCGATGCAATTAC  
GCACCCGGCAAGGTGGGCGGATTCCCACACGACAGCAGCGCCCGGCAAGGTGGGCGGATTTCCACACGGCAGCGGGCGCC  
GGCAAGGTGGGCGCTATTCCCACACGGCAGCGGCGCCCGGCAAGGAGGGCCGATTCCCACACAGCACCGGCGCGCGGCAA  
GGTGGGCGGATTCCCACACGACAGCAGCGCCCGGCAAGGTGGGCGGATTTCCACACAGCACCGGCGCCCGGCAAGGTGG  
GCCGATTCCCACACGGCAGCGGCGCCCGGCAAGGTGGGCGGATTCCCACACGGCAGCGGCGCCCGGCAAGATGGGCGGAT  
TTCCACACAGCACCGGCGCCCGGCAAGGTGGGCGGATTCCCACACGGCAGCGGCGCCCGGCAAGGTGGGCGGATTCCCAC  
ACGGCAGCGGCGCCCGGCAAGATGGGCGGATTCCCACACGGCAGCGGCGCCCGGCAAGATGGGCGGATTTCCACACGGCA  
GCGGCGCCCGGCAAGATGGGCGGATTCCCACACGGCAGCGGCGCCCGGCAAGATGGGCGGATTTCCACACGGCAGCGGC  
GCCCGGCAAGGTGGGCGGATTCCCACACGACAGCGGCGCCCGGCAAGGTGGGCGGATTCCCACACGACAGCGGCGCCCGG  
CAAGATGGGCGGATTCCCATATCGACATGTATGTAGCTTGTGTTATCCGTGGATTGTGCAGCTCAGCGGGTTCGTTGTCTGATG

GCGTAGTGTCCTCCGTAACCGGCCGCGTGCGGCCGCTAACCGCGCAGTACGGCGCCGCGACCCGAAGGCGGGCCGCGCTTCC  
CGCGCGCAGGCGCGCGGCCACTGCGCACCCCGTGGGGGACGTGCGGCAGCTGTGTGGCGGTGAGCGGGATTAGGG  
CTTTGCAGGGAGGGGGCTGGGTGCGGGCGATACGTTTCAGCATTGCGGTTTCCGGCGATTTGCGGCCGGTGCCCGTTAACTC  
CGGCGTGTCGCTTCCATGCCCTGACGGCATAAGAAAATAAAACCGCCATGCTGCGGTCATTCATGATTTTGTGGTGTAGCG  
ATAAATAGTCATGCGAGAAACGTTGAAGCGCTTAGCAACTGCACCAACTGTCATTTTCAGGATCAGCAAGTAAGATTCTAATTT  
GTTTAAACATCTTCTTCAGAAAGTGACGGTTTTCTCCCTCCACACGGCCCCTTGCGCGTGCAGCTGCAAGGCCTGAGCGCGTT  
CTTTCAATATTGCGGTTGCGTTCAAAGCTAGAGAATATCGCCATCAGATGAGTATAGATTTCCCTATAACTGGCGCATTTGTGT  
CTATTCTGTCCTTGATGGCTATGAAAGTTATTCCGCGTTTTCTCAGGTTGTCGAGTAAAGTAATGACTTGACCCAATGAACCACC  
GAGCCGATCTAGTGCCCAAATACTAGGGTATCTCCCTCGCGCAATGCTTTCAGGCAGTTCTCCAGTTCCAGCGCACCTTTTTT  
GTCGCGCTTTGGGCCGCTACGTGAGGTCTGATCCTGATAGATTTGCTCACATCCAGCTTTTGTAGTTTCGTAACCTGGTGCGC  
CACATCCTGAAGATGCGTAGATTTACGGGCACTGTTGCAAAATAGTCGGTGGTGATAAACTTATCATCCCTTTTGTGTAGGGAG  
CTGCACATGAACCCATTCAAAGGCCGGCATTTCAGCGTGACATCATTCTGTGGGCCGTACGCTGGTACTGCAAATACGGCAT  
CAGTTACCGTGAGCTGCAGGAGATGCTGGCTGAACGCGGAGTGAATGTCGATCACTCCACGATTTACCGCTGGGTTCAGCGT  
TATGCGCCTGAAATGAAAAACGGCTGCGCTGGTACTGGCGTAACCCTTCCGATCTTTGCCCGTGGCACATGGATGAAACCTA  
CGTGAAGGTCAATGGCCGCTGGGCGTATCTGTACCGGGCCGTGACAGCCGGGGCCGCACTGTGATTTTTATCTCTCCTCCC  
GTCGTAACAGCAAAGCTGCATACCGGTTTTCTGGGTAAAATCCTCAACAACGTGAAGAAGTGGCAGATCCCGCGATTTCATCAA  
CACGGATAAAGCGCCCGCCTATGGTGCAGCGCTTGGTCTGCTCAAACGCGAAGGCCGGTGCCCGTCTGACGTTGAACACCGA  
CAGATTAAGTACCGGAACAACGTGATTGAATGCGATCATGGCAAACCTGAAACGGATAATCGGCGCCACGCTGGGATTTAAATC  
CATGAAGACGGCTTACGCCACCATCAAAGGTATTGAGGTGATGCGTGCACACTACGCAAAGGCCAGGCCTCAGCATTATTATG  
GTGATCCCCTGGGCGAAATGCGCCTGGTAAGCAGAGTTTTTGAATGTAAGGCCTTTGAATAAGACAAAAGGCTGCCTCATC  
GCTAACTTTGCAACAGTGCCCTTTTAAAAATATGCCTGTGGATATGTGCATATCATCGCTTACCAGCGCCGCTTCGCGGCTCG  
GTCAACCCCTCAGAACCAGCGAAAACAAGTTTTCGCAGTTCTTACGGTTTCATGTTTTAATCCGAGCATGGCGCCAGCACCTTCG  
CGGCACCATCGAGGCCCGCGCTGCTGCCGACCCGGGCCTCACCTCAAATAAAATAAAGTTTTATAAAAATCGTACTTGTATTG  
ACCCCTGTTTTATTCTGAGTATATCCTTTCTGTAACCAAACTACGGAGGCGCCACAGATGGCTCAGAAAAACAGAATTTCAGA  
AACAGAATGGAACAGCTGCTGCCGCAAATGGCTTCTTTGCACACATCACAACAGATATTGGCTATTCCGTGCTTGTCAAAG  
GTGAGAAATCATCAGACGTAGCCATGCGAGTAGGCCGTTCCAAGCAAACATTTCCAGCACCGTTAAGCGAATCTGGGATTT  
GTACCAGAACACCACTCTTAAAGCCGAGAACGGCGAACCATTAAATAGTTTCAGGTCTGGATAACCAGCAAGCCTTGTGAA  
ACTGTTTTTAAAGAAGCCGCGAAGTACAGCATTAAATACATCAGCCTCGGAAATGGAATAAAATAAAGTCCGAAAGGAC  
TTTATTTAAGACTACTAACGCGGCTTTATTACAGTGCTCGCCACCACAGTAAACCACTATCCCCGGTTTACCCAGAGATTGAT  
ATGACACACCCGGGCGAGCTGTACTTTTCCCGTTTTGTTTTGTTTACCAGGTGCTTCAGGCGGTGGGGTTACAAATCGCATGGCCT  
CTATGATCTCGTCGTCGAGTTCAACCGGGTTCGCGCCCTTCTCCACCTCCTGTTTCGTGTTTCGCTATCATCTTCTCCTCGTCAAT  
ATAGCCTTTTCTGTAGGGCTTAGCACAGCGCCAGGCTTAGGCTGGTAAGGCGGAAACCTGTCCATCCAGGAAAGCCGGAA  
ATGGCCTGTCAGCAGTTTCATCACAGGCCATATCGAAAGGGCCACCGGCAATAATATAATGGGTTCATGCTCTGGCCACTTTCT  
GCCTCCCGGTTTCGCGGTATCAGAAGGCATTAGTCTACCCGTTCCATCCGGGCCGCCACTGTTTGTGTGATAGCCACGGC  
GGCCAGGCTCGCCAAAATGGAATTGCCACTGATGAACCATCTCATGCACCAGTGTGAAAGCGTGCCCTTTATGGTTCTGATC  
GAGAAATACCCGGATTTCATAGCGATCTCGTCTACCGTGTACCCACTCTCACGGCCGACGAAACGCTTAAAGGAACAATAGCC  
ATACGTTTCGCTTCTCACGCTGCAACGTTATCAGGCATGGCGGCAGCTCGTTGCTGAATAGCTTCTCATTGAAAAATCGTAGGC  
TCTCTGAAGTTCATCGTAGGTTTTCGGGCGTAGGCAAATCACTGCTAACCTCACATATATGATTGTGCAATACACATAATTTAG  
CTGATCTTTTATACAGAGGAAACGGCTTTTAGGGGTTGTTTGCGGGAGAGGGCGAAATCCTACGCTAAGGCTTTGGCCAACG  
ATATTCTCCGTAAGATTGATGTGTTCCAGGGGATAGGAGAAGTCGTTGATATCTAGTATGACGCTCTGTCGCACCTGCTTGA  
TCGCGGCCGCGATAGCTAGATCGCGTTGCTCCTTCTCCATCCGCGTTCCAAGCTGCGGAAAGGCACCCATAAGCGTACGCC  
TGGTCGAGCAGGCGACGCGATCGACGTCAGCGCACGAGAGAATGCGTCCGCCATCTGTGCAATGCGTCTAGGATCGAGA  
CAAAGGTTGTCTCTGTCAGCCGATCGTAGAACATATTGGCGGCGCAAAGCCACTTACCAGACCAGACCGACGGGATCTA  
TCACCAGCCAGCCGCGACTGGAGAACATGATGTTTTTCATGATGCAGATCGCCATGTAGCCACGAGTTCCGAGGCATTGCTC  
ATCATTGATCGGCTATAATCGCCGCGTGGACGTAGTCAGTTTGACAACCTGCGTTTTGATCATCGCGCGCCCGCTGAAACAA  
AGCTGCAAAGCGATCCCGGATCGGGAGAAGGGCAGAAGGCAGGGGTTCTCAGATGCGGCATACAGCTTCGCCATTAGTTC

CGCTGCAATTCGGTCGCCTGGTAGTCGCCGTGCTCGGCAACGATGTGAGAGAGCATTGCTCCCCGGCATATTCGAGCAAC  
ATCAGATTGTTCTCACGACCGAGCAACCGGACTGCTCCCCTCCCATTGCGCCATAACAGATAGTCGGCCCCGCGCAGTTCATC  
AGCAATGTCTTATAGGTTTCAATCCCTTGACGATTGCAGGAGTCCCGTCTGGCAATGAACTTTCCAAACGAGGCTGGAAA  
AGGTGTCCGCAATGAGAACAGGTTGCGAAACGTGCCAATGAGCAGGAAAAACAGGCGGCATGAACATCAACCCCAAGTCA  
GAGGGTCCAATCGCAGATAGAAGGCAAGGCGTTGCGGGTCTCGATCCCCAATACATTGAATAGGACAGCGAAGG  
CGCGCTCTGCTTCATCTGGCGCTGCCAGTTCTTTCGGCGTTAGCAATCATGAGTGCCAAATCGGCATAGCGATCTGCTGTT  
CGAGCCGCCAAGTTCGATCAGACCCGTGCATTGAAGAGTTTTAGGGTCCACCATGAAGTTCGGCATGCAGGGATCACCATG  
GCAAACAACCATATCGGTGCGCTCTTGGTGCAGCCGACCCGGTAGCTCTCGTTCGACACGAGCCAAAAGATCGAGCTGCGGC  
GTACTCTTGCTCTCGTCCGGTAAGAAGTCGGGATTGACGGCATTGCGGGACACCACATCAACGGCGCGTCCGAACATTCGCG  
ACAGCCTGCGCTCAAACGGACATTGATCAACCGATAGGCTGTGAACAGCGCCAAGTTGCTGCCCCATTGACGGCCACGCTT  
GAGCAAATCCGCTCCAGACAGATCAGCCGCCGTACTCCCGAATTGCCGTTATACCAAGCATGCACCCTCCTGTTCTCCT  
GCCAGTTGATCACCTCGGGGCAAGCCACACCTCGACCTTTGAGCCAAATGAGGCGGTACGCTCTCCAGCGAGCTCACCGC  
GGCGGGAAGCAGGTGCGATTTTCGGAAGGCATGCCCGTACCACGTGAAAAACAAAATCACCAGATTCTCCGCCTCTGA  
CAGGCAACCAGTCAGAATGCGATTACCAAAAAAATATTAGTTGATTCAATGGAGGTTCTTCAGTTTTCTGATGAAGCGC  
GGAGGTGGCTCAACCTGCGAAAAGAAACGAGTTGCTACGTAAGTCGAGAACATGCTTTCATGGTCTCTGAGCTCGCCTTG  
ATGCCCCGAGGCATAGACTGTACAAAAAACAGTCATAACAAGCCATGAAAACCGCCACTGCGCCGTTACCACCGCTGCGTTC  
GGTCAAGGTTCTGGACCAGTTGCGTGAGCGCATACGCTACTTGCATTACAGCTTACGAACCGAACAGGCTTATGTCCACTGG  
GTTTCGTGCCTTCATCCGTTTCCACGGTGTGCGTCACCCGGCAACCTTGGGCAGCAGCGAAGTCGAGGCATTTCTGCTCGC  
TGCGCAACGAGCGCAAGGTTTCGGTCTCCACGCATCGTCAGGCATTGGCGGCCTTGCTGTTCTTACGGCAAGGTGCTGTG  
CACGGATCTGCCCTGGCTTCAGGAGATCGGAAGACCTCGGCCGTGCGGGCGCTTGCCGGTGGTGTGACCCCGGATGAAGT  
GGTTCGCATCCTCGGTTTTCTGGAAGGCGAGCATCGTTTGTTCGCCAGCTTCTGTATGGAACGGGCATGCGGATCAGTGAG  
GGTTTGCAACTGCGGGTCAAGGATCTGGATTTGATCACGGCACGATCATCGTGCGGGAGGGCAAGGGCTCCAAGGATCGG  
GCCTTGATGTTACCCGAGAGCTTGGCACCCAGCCTGCGCGAGCAGCTGTCGCGTGCACGGGCATGGTGGCTGAAGGACCAG  
GCCGAGGGCCGAGCGGCGTTGCGCTTCCCAGCCCTTGAAGGATATCCGCGCGCCGGGCATTCTGCGCGTGTTTC  
TGGGTTTTTTCGCGAGCACACGCATTGACCGATCCACGGAGCGGTGTCGTGCGTCCCATCACATGTATGACCAGACCTTCA  
GCGCGCCTTCAAACGTGCCGTAGAACAAGCAGGCATCACGAAGCCCGCCACACCCGACACCCCTCCGCCACTCGTTGCGGAC  
GGCCTTGCTCCGAGCGGTTACGACATTGCAACCGTGCAGGATCTGCTCGGCCATTCCGACGTCTCTACGACGATGATTTACA  
CGCATGTGCTGAAAGTTGGCGGTGCCGGAGTGCCTCACCGCTTATGCGTGCCTGCCCCCTCACTAGTGAGAGGTAGGGCA  
GCGCAAGTCAATCCTGGCGGATTAACCTGCGCGAAGGCCATCGGTGCCGCATCGAACGGCCGGTTGCGGAAAGTCC  
TCCCTGCGTCCGCTGATGGCCGGCAGCAGCCGTCGTTGCCTGATGGATCCAACCCCTCCGCTGCTATAGTGACGTCGGCTT  
TGACGTTTTCAGTGCAGCCGTTCTGAAAACGACAAACGATGTCAGCCAATAAGTTGTTGTAATAATCGACAAGTGTGTTGTTG  
AACTCGCCGCTCTGTAAGACTGCATTATCAGTTTGAATCAGGGCGGCTATGGTGTGATTATAACCCATAAACCGATGACGGCT  
GCACGTAAATCTGTGGATGCTCTTATGATGGCGATTCAACGTTTGTGTTCCACGCATGGCGACAGCATTGTTTAGCCAGCAAT  
AATCCATTATAAGTTGGGGGAGGGGCTCCGACAACCTGCAAAGCTATCTTTTCTGTATTGTTTGGATGTCGTCCGCAAGAAT  
GGTATTCTCGATCAGTTCTCGAGCCAATAATGATGTTTTCGAAGCAGACGGCCAACACCGTCTGCTTCGTTTCTGTTTCTGTT  
TTCCACTGCCAGCGGTTACTGATTGTTACGCACGTAAGTAGCAAAGTGAATGCGCTCTGAGTCTCATCAACGGTTGCCTCC  
ACAGTCTCGCTGGCACTGGAATCAATGTGAAAATTGTTCTGGATCGGATCAACAGGAATAAATCGATCACAGTCGAACTCTCT  
TGGAATTATGGTCATGTGCAGTTTCGTTGCTGATGAAAGAGCTTGAATGTACAACCTTCTCCCCACCAATGACAGCAATGCGTTG  
ATCGGTATTCTCATAAGGTTGATCACAGCACGAAGATCAGGAACGACAGTAGCGCCTATGACATCTTCTGTTTTAACGTCGA  
GGAGATCACGAACGATTGCGGTTGCGGGGAGAATTCCTTTCTCCTTGATTGCTCCTCGGCGCCATCCTTTCTAACTGCATGTC  
ACGCATGTCAGTATACGTGTGTTTCCCATAACGCACACGCGGATCTCTTTAGAAATCCGCGTAAATCGCGCCATGTCTTCTTG  
CATTTCCATGGAATCTTGCCGCTTTCCCGAATCCCAACTTGAATCCACAGCGACTATTAGCTCAAGTTGTGGGTGACTCATT  
AAAACCTCAAACAGTCGATGCTGGTTGTTCCAGATATTGCTTACGGAAGGTGGCCAGATCAATCAGTTTGTATTTGCCTTTC  
CGCTGTTGTTGAGATCGTGCACCTTTCTCAATTTGCCGGAAGATCCGGAAGTGGATGCCGCGATCACCATGGTGGTCTTCGAC  
GAGACTGATGATTGCACTTACCACCCTCAGCTTCAATCAGCTTCTCCAAGGCCGCTCACGAAAACCGGTGATCACGATCTT  
CTCACCGGTAAAACGATCCCCGAAGTGACCTGCTGTTTGAACCCGATGATTGATTGAATCTTGTGTAATAGCTCGGCATGTT

AGCCATACCTGCAAGCACTTTTGC GG CAGTTTTGTAGCTGAATTTGTCGACGCTAACGATCTGCTCTTCGGTGATGGCATTGA  
AATCATCCAAGGTCTTAATATCCAAGCCTTCACACAGAGCTTTCATCTTGCGGCGCCCAACGCCGCGCCCAAAGTGGGGC  
ATC GACCCCAACCAACCGACAGGGGAACACTACTGGGTATAGGAAGTATAAACACCTTTTGTCTCATCCGAAGTATCTTAC  
CTGAAATTCCTCACTCGTTTACCGCTCAAGCCCCAATTTAACTGCCGGTCCAGCCTAAACCGCTCTAATAAGGTTTCGATTTG  
GCGGTAAAATCTCTAGCCTGATAGCTCGAGAGATACAAACCTGCCCCACCGCCCCGTTTAAAAGTTGGCAGTGTTGAGCAGTG  
TTGGATTTGGGGTTGTCAGTCAAAGAGACGACTCTGTGATGGATCGAACAGGCTGGGAGTCAGTGGC GCGCTCGTTCTGG  
TGGCAGCTCACGCTGCTTGGCGGCATTCGCCTTGGCTGTTTTCTGTTTCAGATGCTTGAGAATCTGCTCAATGACCTTCGGATC  
TTCGATGCTGGCAATCACTTTGACGTGACCGCCGCAGTGTTGCGAGACTTCAATATCAATATTGAAGACTCGTTGAGGCGTT  
GCATCCAGGTCATGGCGCGGTGGCGCTCTGCAGGACTCTTGTACGCCAGTTAGTATCGAGACCTTCCGATTTGTCGGGCTTC  
TTGCCCCGCTTGGCGGGTGTACTTGAACCTCGGTGTTTGCTGTTCCGGTGCAAAGACGCCGTGGAAGCGTGTGAGGTTGACTC  
GCGGCTTAGGTACCAACGCAGCGAGTTTGGCGATGAAGTCCAGCGGCTCGAAGATCACATGGGTGGTGCCATTGCGGTACG  
GAGTTTTGAGCTCGTAACGCACCTGCCATTGGCGGTTAATGCCAGACGTTTTTCTGAAACCGCTGGCCGACTAATGTAGCGA  
CACAAGCGCTCAAGCTTATCCCGCTGATGCGCTTCGGCCATCACACCGGCGTGTAGCGAGAAACAGCATGGTTGGCTACTC  
GACTGCTTGAGTCGGCTTATCCTCACGCCCTGGCAAGGTTTGCAGGGTGAAGACTTTGCGCCCTTGCTGGGGGCCGACGG  
CAATGCGATACGTAACCGAAGCACCATGTAATTGAGTCAGCGTATCGTCTTCGCCCTTCCAGTGTCAACCACGTATTCTCGG  
CATCACGCTCCAAAATCCCACGCTTTTCCATGCAGCGAGCGATGCGATGGCTGAGGGTGTGAGCGAGCGTATTAGCTCATCG  
TAAGTGGGTGCCTTGACACGATGGAAGCGTTGCTTGCCATAGTCATCTTCGGCATAGACACCATCGAGAAACAGCATGTGGTA  
GTGGACATTGAGATTTAGCGCGGAGCCAAAGCGTTGGATAAGAGTCACTGAGCCAGTTTGTGCAGAGGCTTTGGTGTAAAC  
GGCTTTTTTATGATCAGATGAGTTGAGAGTGTACGATAGACGATACTCAAGACCTGGCCATCAGCTGGGGATGGCGAGCCAGC  
AAAAGCGTAGCTGGAAAGGAAAGCTGAGCACCCACTGGCGAATGGGCTCCTTGGGGAAGACTTCGTCTATCAGCAGCGCC  
GCACTCTCGGCCATCCGGCGGGCACCGCAGCTAGGGCAAAGCCGCGTCTTTACAGCTGAAGGCGACCAGACGCTCGTGA  
TGACAATCCTCGCAGCGAAACCCGCATGAAACCATACTCCAGACGGCCACATTGGAGGAGGTTGTTGAATCTTGTGGATGTA  
GCGAGGCAGGTGTTGACCTTGGGCTTCGAGTGAGGCTTTGAAGGCTGGGTAGTGCTGCTCAACCAGCTGGTAGAGCAGCG  
TCTGGTTCGGGTTGGTGGCGTTTCGTAACCGTTTGTGTTGAGTGGGCGATTGACTCGCCGTGGCGTTCCTTGCCAGCGACATGGG  
TATCCTCCGCTGATACTGTGGTTATGTACAGTATCAGCGGCTTGCCTCAGACGTCCAGTCTGGCCCTAGACATCGCTAAATGCT  
TAACCCGCAATAGCCCTCACGAGTTGTTATCAGCCACTACCGGTTGAGCGAGAAGGTTTTGGGTTCCAGGGTGCTATTGCTCCA  
CCAATCACAATACTGAAGCCCCAACTGTTATCAGTTGGGGCTTTTTCTTGTCTGTTTGC GCGGTTGCGTTTTATCGGTAGTTG  
TCGAGCTCTGCACCATCCCACATAAGAGCTTAAACGGTGCGATCTTCAACGCCATCACACAAAACCTTTCTTTTTTACGCACAGTC  
AACTTATTGGATGTTTTATTAACAACCCAAAAGGAGATATTTAGCGGGCGGCCGGAAGGTGAATGCTAGGCATGATCTAACCC  
TCGGTCTCTGGCGTCGCGACTGCGAAATTTGCGGAGGGTTTCCGAGAAGGTGATTGCGCTTCGAGATCTCCAGGCGCGTG  
GGTGC G GACGTAGTCAGCGCCATTGCCGATCGCGTGAAGTTCGCGCAAGGCTCGCTGGACCCAGATCCTTTACAGGAAG  
GCCAACGGTGGCGCCCAAGAAGGATTTCCGCGACACCGAGACCAATAGCGGAAGCCCCAACGCCGACTTCAGCTTTTGAAG  
GTTTCGACAGCACGTGCAGCGATGTTTCCGGTGC GGGCTCAAGAAAATCCCATCCCCGATCGAGGATGAGCCGGTCGGC  
AGCGACCCCGCTCCGTCGCAAGGCGGAAACCCGCGCCTCGAAGAACCGCACAAATCTCGTCGAGCGCGTCTTCGGGTGCAAG  
GTGACCGGTGCGGGTGGCGATGCCATCCGCTGCGCTGAGTGCATAACCACCAGCCTGCAGTCCGCTCAGCAATATCGGGA  
TAGAGCGCAGGGTCAGGAAATCCTTGGATATCGTTCAGGTAGCCACGCCGCGCTTGAGCGCATAGCGCTGGGTTTTCCGGTT  
GGAAGCTGTCGATTGAAACACGGTGCATCTGATCGGACAGGGCGTCTAAGAGCGGCGCAATACGTCTGATCTCATCGGCCGG  
CGATACAGGCCTCGCGTCCGGATGGCTGGCGGCCGGTCCGACATCCACGACGTCTGATCCGACTCGCAGCATTTCGATCGCC  
GCGGTGACAGCGCCGGCGGGTCTAGCCGCCGGTCTCATCGAAGAAGGAGTCTCGGTGAGATTGAGAATGCCGAACACC  
GTCACCATGGCGTCGGCTCCGCGAGCGACTTCCACGATGGGGATCGGGCGAGCAAAAAGGCAGCAATTATGAGCCCCATAC  
CTACAAAGCCCCACGCATCAAGCTTTTGCCATGAAGCAACCAGGCAATGGCTGTAATTATGACGACGCCGAGTCCCGACCA  
GACTGCATAAGCAACACCGACAGGGATGGATTTGAGAACCAGACGCAGCCGAGGCGCCGAAACTAAACCGATGTCTGTA  
GGGTTACCGCTGGATCTGCGTGAATTCAGCAGCAGCAAGAGAAAGACTTTCTACAAACCAGCTTACAGCAGGCAAAAATTA  
ACCAGAAAAAAGCCGCTGAATTACTGGGTCTGACTTACCATCAGCTTCGCGCTTTGCTGAAAAAACACCAGATTTAACGCAC  
ATTTGCAGATGTTATATTGGCGGATTTGACGCATAACCTCATCAGGGTTTACCATGACGCCATTACTGTATAAAAAAACAGGCA  
CAAATATGGCTCTGGCACTCGTTGGCGAAAAAATTAACAGAAACCGCTTACCGGTGAGAAAATTGAAAATAGTACATTTTT

TAAGTGTGATTTTTTCAGGTGCCGACCTGAGCGGCACTGAATTTATCGGCTGTCAGTTCTATGATCGTGAAAGCCAGAAAGGGT  
GCAATTTTAGTCGTGCGATGCTGAAAGATGCCATTTTTAAAAGCTGTGATTTATCCATGGCGGATTTTCGCAATGCCAGTGCGC  
TTGGCATTGAAATTCGCCACTGTCGTGCGCAAGGCGCAGATTTTCGCGGCGCAAGTTTTATGAATATGATCACTACTCGCACCT  
GGTTTTGCAGTGCATATACACTAACACAAATCTAAGCTACGCCAATTTTTCGAAAGTCGTGTTGGAAAAGTGTGAGCTGTGG  
GAAAACCGTTGGATGGGGGCCAGGTAAGTGGGCGCGACGTTTTCAGTGGTTCAGATCTCTCCGGCGGCGAGTTTTCGACTTTC  
GACTGGCGAGCAGCAAACCTCACACATTGCGATCTGACCAATTCGGAGTTGGGTGACTTAGATATTCGGCGCGTTGATTTACA  
AGGCGTTAAGTTGGACAACCTACCAGGCATCGTTGCTCATGGAACGTCTTGGCATCGCGATTATTGGCTAGTCTTCAGGGAGC  
GGTGAATATTCGCCCCCTGCACAGCTTTTTACCCTTCAGGCATCGCTGAAGAGTGGTGTGTGGAATTTTTCCACTCTTACC  
TCCCATGCATAAGTGAATGTGTAGCGGGCTGAAACCGTTGATTTGTCCGCGAAGGTAAATGTGTAGGTACCGGTGTCTATCGC  
CTTATTACACCCAGGCGAATGGTACGCATGTCAATTTCCCGTTCGGCTTTTTTCGCAAGAAAATGCTCGAAATAAGGCACTG  
TTGCAAATAGTCGGTGGTGATAAACTTATCATCCCTTTTGTGATGGAGCTGCACATGAACCCATTCAAAGGCCGGCATTTC  
AGCGTGACATCATTCTGTGGGCCGTACGCTGGTACTGCAAATACGGCATCAGTTACCGTGAGCTGCAGGAGATGCTGGCTGA  
ACGCGGAGTGAATGTCGATCACTCCACGATTTACCCTGGGTTTTCAGCGTTATGCGCCTGAAATGGAAAAACGGCTGCGCTGG  
TACTGGCGTAACCTTCCGATCTTTGCCCGTGGCACATGGATGAAACCTACGTGAAGGTCAATGGCCGCTGGGCGTATCTGTA  
CCGGGCCGTGACAGCCGGGGCCGCACTGTCGATTTTTATCTCTCTCCCGTTCGTAACAGCAAAGCTGCATACCGTTTTCTGG  
GTAAATCCTCAACAACGTGAAGAAGTGGCAGATCCCGCGATTATCAACACGGATAAAGCGCCCGCCTATGGTCGCGCGCT  
TGCTCTGCTCAAACGCGAAGGCCGGTGGCCGTGACGTTGAACACCGACAGATTAAGTACCGGAACAACGTGATTGAATGC  
GATCATGGCAAACCTGAAACGGATAATCGGCGCCACGCTGGGATTTAAATCCATGAAGACGGCTTACGCCACCATCAAAGGTAT  
TGAGGTGATGCGTGCCTACGCAAAGGCCAGGCCTCAGCATTATTTATGTTGATCCCTGGGCGAAATGCGCCTGGTAAGC  
AGAGTTTTTGAATGTAAGGCCTTTGAATAAGACAAAAGGCTGCCTCATCGCTAACTTTGCAACAGTGCCGTACCGACGGTG  
ATATGGGGCAAATGGTGGTACCATCCTGTGCGGCTGTGGCACAGGCTGAACGCCGGAGGATCCTAGAACGCACGAATGAGG  
GCCGACAGGAAGCAAAGCTGAAAGGAATCAAATTTGGCCGACAGGCGTACCGTGGACAGGAACGTGCTGCTGACGCTTCATC  
AGAAGGGCACTGGTGAACGGAATTTGCTCATCAGCTCAGTATTGCCCGCTCCACGGTTTTATAAAATTTCTGAAGACGAAAG  
GGCCTCGTGATACGCTATTTTTATAGGTTAATGTCATGATAATAATGTTTTCTTAGACGTGAGTGGCACTTTTCGGGGAAATG  
TGCGCGGAACCCCTATTTGTTTTTTTTCTAAATACATTCAAATATGTATCCGCTCATGAGACAATAACCCCTGGTAAATGCTTCAA  
TAATATTGAAAAGGAAGAGTATGAGTATTCAACATTTTCGTGTGCGCCCTATTCCCTTTTTTTCGCGCATTTTGCCTTCTGTTT  
TTGCTCACCCAGAAACGCTGGTGAAGTAAAAGATGCTGAAGATCAGTTGGGTGCACGAGTGGGTTACATCGAACTGGATCT  
CAACAGCGGTAAGATCCTTGAGAGTTTTCGCCCCGAAGAACGTTTTCCAATGATGAGCACTTTTAAAGTTCTGCTATGTGGTG  
CGGTATTATCCCGTGTGACGCCGGCAAGAGCAAACCTCGGTGCGCCGATACACTATTCTCAGAATGACTTGGTTGAGTACTCA  
CCAGTACAGAAAAGCATCTTACGGATGGCATGACAGTAAGAGAATTATGCAAGTGTGCTGCCATAACCATGAGTGATAACACTGC  
TGCCAACTTACTTCTGACAACGATCGGAGGACCGAAGGAGCTAACCCTTTTTTGCACAACATGGGGGATCATGTAACCTCGC  
CTTGATCGTTGGGAACCGGAGCTGAATGAAGCCATACCAAACGACGAGCGTGACACCACGATGCCTGCAGCAATGGCAACA  
ACGTTGCGCAAACCTATTAACCTGGCGAACTACTTACTCTAGCTTCCCGCAACAATTAATAGACTGGATGGAGGCGGATAAAGT  
TGCAGGACCACTTCTGCGCTCGGCCCTTCCGGCTGGCTGGTTATTGCTGATAAATCTGGAGCCGGTGAGCGTGGGTCTCGC  
GGTATCATTGCAGCACTGGGGCCAGATGGTAAGCCCTCCCGTATCGTAGTTATCTACACGACGGGGAGTCAGGCAACTATGGA  
TGAACGAAATAGACAGATCGCTGAGATAGGTGCCTCACTGATTAAGCATTGGTAACCTGTCAGACCAAGTTTACTCATATATACT  
TTAGATTGATTTAAACTTCATTTTTAATTTAAAAGGATCTAGGTGAAGATCCTTTTTGATAATCTCATGACCAAATCCCTAAC  
GTGAGTTTTTCGTTCCACTGAGCGTCAGACCCCGTGTGACACCGGCGTACCCTCGGTGCTATCTTCGCGCCCAATAGTCGGG  
GCTTGGCCAGGACTTCTGAGGCCGTCCGTAACCTCACCTTCAAACAAGGAATATCGTTGATGTCAGTGTATCGCCGTCTAGTT  
CTGCTGTCTTGTCTCTCATGGCCGTGGCTGGCTTTTTCTGCCACCGCGCTGACCAACCTCGTCGCGGAACCATTCGCTAAACTC  
GAACAGGACTTTGGCGGCTCCATCGGTGTGTACGCGATGGATAACCGGCTCAGGCGCAACTGTAAGTTACCGCGCTGAGGAG  
CGCTTCCCACTGTGACGCTCATTCAAGGGCTTTCTTGCTGCCGCTGTGCTGGCTCGCAGCCAGCAGCAGGCCGGCTTGCTGG  
ACACACCCATCCGTTACGGCAAAAATGCGCTGGTCCGTGGTCAACCATCTCGGAAAAATATCTGACAACAGGCATGACGGTG  
GCGGAGCTGTCCGCGGCCCGCGTGAATAACAGTGAACGCCCGCCCAATTTGTTGCTGAAGGAGTTGGGCGGCCCGGCC  
GGGCTGACGGCCTTCATGCGCTCTATCGGCGATAACACGTTCCGTCTGGACCGCTGGGAGCTGGAGCTGAACTCCGCCATCC  
CAGGCGATGCGCGGATACCTCATCGCCGCGCGCCGTGACGGAAAGCTTACAAAACCTGACACTGGGCTCTGCACTGGCTG

CGCCGCAGCGGCAGCAGTTTGTGATTGGCTAAAGGGAAACACGACCGGCAACCACCGCATCCGCGCGGCGGTGCCGGCA  
GACTGGGCAGTCGGAGACAAAACCGGAACCTGCGGAGTGTATGGCACGGCAAATGACTATGCCGTCTGTTGCCACTGGG  
CGCGCACCTATTGTGTTGGCCGTCTACACCCGGGCGCCTAACAAAGGATGACAAGCACAGCGAGGCCGTATCGCCGCTGCGG  
CTAGACTCGCGCTCGAGGGATTGGGCGTCAACGGGCAGTAAGGCTCTGAAAATCATCTATTGGCCACCACCGCCGCCCTTG  
CGGGCGGCATGGATTACCAACCACTGTCACATTTAGGCTAGGAGTCTGCGCGGCAGAGCCGTGTGACCGGTTTTCTGTAGAG  
CACTGACGATGGCGGCGGCGCTCTCTGCAATTGGCAAGGCGTTCGGCGCCAAGGATACCAATCTTTCGGCGCGCGGCGTGT  
ATGACGACTGGGGTGCATTTGAGCCGCCCAATTAACCTTCGCCCTCACAGATACGCCATTCGCCCTCAGATTTAGCGCCATGCA  
GACGAGCTTCCACTCGGCTTGCACCTTGTCCAGGCCCTCATGCTGAACTGACGCAATCCCATCACCGCCTTGATCCAACCATT  
CGGAGCCTCCACGATCGACTTGCGCCGGCGGTAAGCTGCATCGCCTTGCTCCGTTTTCAATTCGCCGCAATCGCCGCCGTAT  
GCGGATGGGTCTTGGCATTGACCTTGGCATCTTCACGTCCCTCGCGGCCGAGGGCAACGATGACATCGCCGTGGTGATCGGC  
GACCTTTGCCAGAACAGCCTCACTACGGAATCCCGCATCCGCCAGCGTCTGGGCCGGCATTCTCCGGTGTGGCCTGAACT  
GCTGCCAGCATGCCAGCAGCGCTGACTGTCCGCGGCGCAGTTGGTCAAATCCGCCGCCACGATGATCTGGTGCTCGGCAT  
CGACCGCTGTGTACCCGTTGTAGCTCTGCTCGGAGCCACCACCGCGTGTTCATGATCCGGCTGTCCGGATCGGTGAAGCTT  
TCCTGATCACGGTCATCCGGCACACCAAACCTCGCGTTTGTACGAGCCACCGCCCTTGTCCGAGCCATCCGGATGGCGAGGCC  
GGCGGCCATCGTCTTCGCTGCGCCCCGGGCGTGTCCGCTTCACGCTGGCGCGCTTCAGGGGTCGGTTCGGGCTGAGGG  
CGAAATGACACCCTAAGCGTTAGCTCTGTGTCGTTGCACGATGTCAGCGACGGTATTCTTGCTGATACCGAGCTCGCGTGCGA  
TCCAGCGATAGCTGCGTCCCTCGGCCCTCATCGCAACCACCTTAGGCAAAAGTCGGTCTGATTTTGGTTCGCACTCCGGCCTGA  
CGACCAAGCCTTTACCAGTGCCTTCGCAACAGCAAGGCCTGACTTGACCCGCTCGCTGATGAGATCCCGCTCAAACCTCCGC  
AATGCCGAAAGAAACGTCGCCAGCATTTCGTCCATACGGCGACGAAAGATCGAACGCCATTCCATTCATGGCTATCACGGAA  
ACCTTCCAGTTCTCCAGTTCACGTAGCGTATTGAGCAGATCGAGCGTCGAGCGCCCCACCGGAAAGCTCAGTGACCAGGA  
TTGCATCAATTTGTCTGGACTGGGCAAGCGCCAGGACTTTCTTTCGCTCGGCCGGTCGAGTTTAGTTCCTGAACCTGTTTCC  
TTAAATATCCACCACGTCGTAGCCGGCACGGCCGGCGAAGGCTCGCAGATCAAATTCCTGGCGTTCACAAGACTGATCCGC  
TGTTGAAACCCGGCAGTAAATGGCGGCACGATGTCCAATTGAACCCTCCTGGATTTTTGTATCGGAACGCCCTGATTTATATG  
GGCTGGCTGTTGTCCAAAACAGACTATACTTCAAAGGGACGAATTTGTATGTCACGACGCCATATTTTACCGAACGGCAGC  
GAGCAGCGCTGTTTCGATCTGCCACGGACGAACTGTCGCTACTGAAGTTCTACACGCTGGGCGATGATGACCTGGAAAACAT  
TAGGCAGCGCCGACAGCCGAAACAGGATTGGCTTTGCCCTGCAACTTTGTGCCTTACGATATCCGGGCCGTGCACTGGCT  
CCTGGTGAGATGATCCCGCGTGAAGTCTTTCCTTCGTCGGTCTCAGCTTGGAGTTCGGCTGATGCGCTTCTCACTTATGCC  
ACACGGCGCCAAACCCGTCAGCAGCACATGGACACGCTGCGCGAAATTTACGGCTACAAGACCTTCACGGGCCGTGGTGCC  
CGTGATCTGCGGGAGTGGACTTTCGGCCAGGCCGAAGATGCCAGATCAAACGAGGATCTTGCTCATCGTTTTATTGTGCGGT  
GTCGGGAAACTTCCACCATTCTGCCCGCAGTATCGACAATCGAGCGCTTGTGCGCGGATGCTCTGGTCCCGCTGAGCGGCG  
GATTGAAACGCGGATTGTGGAAAATTAACAGCGGATGTTTCGCGATCACCTGGACAAACTTCTGAGTGAAATGCTCGCCGGC  
AATATCAGTTGTTTCATCTGGCTTCGCAACTTCGAGGTTGGTAACAACCTCGGCTGCTGCTAACCCTTTCGTCGACAGGCTCGA  
ATTTCTGCGTACCCTGAATATCAATCATAGTGCTTTGGCCAGCATACTGCCATCGCATTGCCCGCTGCGTCGGCAGGGTGA  
ACGCTACTTACCGACGGTTTTCGCTGACATCACTTCGGACCCGCGCTGGGCGATCCTTGCCGTCTGTGTTGTGGAGTGGGAA  
GCGGCGATTGCTGATGCCATAGTCGAAACCCATGACAGGATCGTAGGAAAAACCTGGCGGGAAGCGAAGCGCCAGCATGAC  
GAAACAATTTCCGGCTCTAAAGCCACACTCACGGATACGATCCGTACCTTACCAGCGCTGGGAGCTTCGTTGCTTGAGGCCCG  
CAGTGACGGAACCCCGCTGGAGATGGCTGTCGCCAGTTCGGTTGCATGGGACCGGCTCGCTCAACTGGTAGCGACAGGGAC  
TCAACTCAGCAACACGCTAGCCGATGAGCCTTTCGATATGTCGGGCAGGGATAACCATCGCTTTCGTCGTTATGCGCCCCGAT  
GTTGCGCTGTCTGAAGCTCGAAGCCGCGCCGGTTCGCCGACCATTGGTAGCAGCAGCTTTGTGATCGGAGAGATGAAAGG  
TGTTGCATCGCCAGAAAGCGTTTTCTGCGGCCAGCTCAAATGGAACCGTCATTTACGAGCTCAGGAAAAAGGAGATACC  
CGTCTTTGGGAAGTGGCGTACTCTTTCACCTCCGGGATGCTTTTCGTTCCGGAGATGTCTGGCTCGCTCATTTCGCGCCGCTA  
TGGTGACCTCAAGCAGGTAAGTGGTCCGATGATCGCGGCGCAGGAAAATGCAAACTGGCCGTGCCTTCCAACCCACAGGA  
TTGGCTGGCAGACAGAAAGGCGCGACTCACGATCGCTCTAAGCGGCTGGCCGGGCTGCCGTAACGGCACTATTCCGCA  
CGGTAGCATAGAAGATGGAACGTTGCGGATCGACAGGTTGACAGCAGACGTGCCGGATGGTGCCGAGGCACTCATACTGGA  
TCTGTATCGCCGAATGCCGTCCGTTCCGATTACCGACATGCTGCTTGAAGTTGATGCAGCCCTTGGTTTCACAGATGCGTTTAC  
CCATCTGAGAACCGGGGCTCCATGTGCGGACCGGATCGGTCTGCTCAACGTCTGCTCGCTGAAGGGCTCAATCTGGGCCGTG



CGTAAGATGGCGGAAGCTACAAACACGCATGATTACTGGCAGCTCTCACGCCTTGCCCGCTGGCATGTTGAAAGCGAAGCCA  
TGAACCAGGCATTGGCAATTGTGGTGGCCGCGCAGGGTAAACTGCCGATGTCACGCGTCTGGGGGATGGGCACGTCAGCAT  
CGAGCGATGGTCAGTTTTTCCCGACAGCGCGGCATGGCGAAGCCATGAACATGGTCAATGCCAAATATGGTTCTGTTCCCGG  
CCTCAAAGCGTATACTCACGTAAGCGACCAGTTCGCGCCATTGCTTGTGTCAGTCGATCCCGGCGACCGTGAGCGAGGCACCG  
TATATTCTCGATGGACTACTGATGAACGAGGTCGGTCGCCATGTTGCGAACAGTATGCCGATACAGCAGGATTCACCGACCAT  
TTGTTCCGAGCCAGTAGCCTGCTCGGCTACAATCTCGTTCTGCGAATCAGGGATCTGCCATCGAAGCGGTTGTACGTATTTAAT  
CCCGATACGACCCCGAGGGAGTTACGCAAGTTGGTAGGTGGAAAAGCCCGGGAGGATCTTATCGTTGCGAACTGGCCTGATA  
TTTTCCGTTGTGCCGCGACGATGACCGCTGGCAAATCAGGCCAGCCAACTCCTGCGCAAGCTCGCTTCTTACCCACGACA  
AAACAACCTTGCAAGTTGCGCTTCGTGAAGTTGGTCGTATTGAACGACCCTTTTTATTATTGAGTGGATCCTGGATACGGACA  
TGCAGCGGCGTGCTCAGATCGGTCTTAACAAGGGAGAGGCCACCATGCGCTCAAAAATGCGCTCCGTATCGGGAGGCAGG  
GGGAAATTCGCGATCGCACGACAGAGGGGCGAGCACTACCGAATCGCTGGGCTCAATTTATTGACTGCGGTGATCATTACTG  
GAATACCGTCCATCTTGGTCATGCCGTCACGGAGCGGCGGAACGAAGGGTTGGATGTTCCCCCTGAATTTCTTCCCCACATAT  
CCCCATTGGGCTGGGCGCACATTCTACTGACTGGCGAATATCTTTGGCCCAAGGAACCGAAAGCTTAGGGTGTCAATTCGCC  
TCAGCCGGAACCGACCCCTTCCAGGCGCGCCTTTGCCGCTGGATCGCTCCAGGCGCTTCTCGCGGCGAGAAATCTCGGCA  
GGAATGTCCAGCTCCGGCTCGTTACGCTCCTGGTCGTCGGTAGCCTTGGCGCGATCAAGCAGCGCCTTGATCTCGCAATGCA  
ATTCGTCTCGGCCGCTTCATGCGCTTATAGCTCATCGCCTTGTTGGCGGCTGGCGTTGGCTTTTACCTTGGTGCCGTCGACCG  
CGATCGTGCCAAGCTTCACCAGCCACATTGCGCGCCAGTTGCACCACCTGAACGAACAAATTCTCAAGCTCGGTGAGGTG  
TAGGGCACGGAAGTCACTCAGCGTGCAGTGGGCCGGAAGTTTCCAGCGGCCAGCACACGCAACGCGACATCCTCGTACA  
GCTTCTCGGCTAGTTTGCGCGAAGAGAAGACGCCGCTCGCGTAACCATAGATCAGCACTTTGACCATCATCGCCGGATGAAA  
CGGCTGATTGCCCGGACCACCGCCGCGCATAACGGGCGTGGAAATGCGCTCAAGTCCAGCGTATCGACAGTCTCGCTGATGAAG  
TAGGCAAGATGCCCTTCAAGTAGCCACTCTCCAGAGAAGGGGGCAGCAGATAGGATTGGTCGGGTGCGTAAGGAAGGTA  
ACTGGCAGCCATCCCGTATCGTCTCGATCTCCGCGATTGGCTTCTGCCGCGCAGGCTCCTAGGCCACCGTAGCTAAACA  
TACGAGAAAAACCGCTTCTTGAGCGCTCTCTGAGACCACCTTGCCGACAACGCAGAAACGGTTGCGGAAAAATCGGCGTTT  
CCGGCGTACGCCACCCGACCTGGACGAACCTATTGCGGACCTGGAAGTGGAGTAGCGGAATTCGCCGGGTTTCAGCGTCGC  
GCCACAGCGCCTCAGATAGATGCGGTAGCCTTTGGCGGGTCGTCATGCCGCGGACCACCCCCAAAAAATTCCACAATGCGG  
AATGGCGGAATTTTCTGGGGTTCCCGCTTACCCCCCTTCCAGGCGAGTAGCCAACCTGAACGGATGGTTCCACCGCAAAGG  
GGGCGAGGGCGGCTGTGCTAAATGCTGCGGCCAGAAGCCAGGTTGCTAAGTTTTTATTACAGGCTCCCGTTACACACTGCA  
TTTTATATTAGGGTCAAATAAATTTCTTTGATTTTCCGCTTTTCCATATGCACCACAACGTCAATGGTGGAGTAGAGCATTG  
CATAATATCGCTCATATCGAGCATAACGGCCGATAGGGGTCGCTTGATAAGCAGCCCAATACGGTTAAAGGCATCGCGCGCAG  
AGTTAGCGTGCGTTGACATAACCCGCTGGATGGCCGGTATTAAGTGCTTTAAGATAATCCCACGCAGCATCATCCCTAAGCT  
CAGTCATGATGATACGGCCCGGTGTCAGACGCATACAGGCTCGCAGGGCATCAGTGGCGCTGACGCGGCCGATCTTTCTG  
ATCGCCGTACATCATATAACGGCTTCTACAACGTGATCGACCGTGACTTCGTGAACGTCCTTAAATAATTACAGCTCGTCT  
TTATGTAGCGATTTTAAACAGCGCGCGCTGAGTACCGTTTTTCCCGACCCGGTTTACCAGCAGATCACGATAGTGCCTTTCTC  
TCAACGGCGGTTTGCAGGAATGCGGGCCATTTTTCGCTGCTGTGCAGCTCTTAAAGAAAAAATCATCATCCGTTAGGCTTTG  
CTTGCTGCCGTAATCTTCCGGCAGTCACTGAAAATCCCCTCGCGGGTCAGCTGCTCCAGATTTTTATCGGCCGCAAATCCTT  
ACGAAACGCTACGGCCGTTGTACCGTCAATACCCGAGGGGGCAGACAGATAACGCCCTGATCCCGCCAGGCAGGATCAC  
GTCATTAATGGCCTGCATGGTCAGCTTGTGCTGCTACCAACGATTTAGCAAGGTTCTAATAAAATCTGCCGTAATTGCCGC  
GTTCTGCACAACCCTGCGGCCGCTGAACGTATCACAGATAACTTCTGAAAGCAGTTAATGCGAATTTCAAAAACAGTAGGAT  
CTTCTAAATACTCGCGCAGTGGGCCAAGTTGATAGAAAGCTGCATCAGTCATGATTACTCCTGAAGAAAAGCGGGCGCTAAG  
CGCCACTTTTTTGTGTTGCTGCGAGCGTATAACGCCGCTGAAATCGAGGTCGCGGGCAACAAAATGCTCACCGCATCACC  
CTGCTGATCGTAGAGGGTAGGGGGGATAGACATGTAAGAGCGGAGTGCTTACAGACCCAGCTGCTCACCGCTGTTTTCTGTG  
CTGTTGACTGAATGTTATTACTCTGCGTCTGGTTAACCAGCGCCGTTAAGGTGTCAGAGAACAAACGAAATCATGATCGACCA  
CGCAGACGCTCCACATATGGGTATCCACCTGGCCCGAATCCCGCGCTGCCGAGTGAGTTCGTTCCGGCACTGTCAATATT  
AACGATTGTCCTGCTGTTGCTGCGGATAACGCTCCAGAGAACAAACGCGCGCCTGGCCGCTTTTGTATACCACCGGTAA  
TCTGCCCGTCAACCCATGAGCCTTATCAATCAGCCTAACGAGTCCATCAGCTGAGTAAACGTCCTGTGAAACCCGGCAGGAA  
ACCTGACCCGGAACAGTGGTATCCAGCTCGGTGCCGGTACCACAGGGGATCATTTTGCCTTTCGGAACAGTCAGGCTGGGAT

TAGCCATGACTCCAGCGGGCTAGCCTTCAGCCTTG CAGGAGTCAGGTTTTAGCGAGTGCTGAACTACCTTCGCTTGTTCG  
TTGTCCTGGGGCTGCACTCCGGGACTATTGCTTGTAGCCGCTGATTAGTCTGGGCCAGCTCGCCGCCAGACGACGCTGCAT  
AGCCAGTTCTTCAGGCGAAGGTTCTTTACGCTTATTAGAGGTACGCGCGGGCATTGCTGCTGCCCGCATCTGCATCTGCCT  
GTGCGGCAGCCTGCACAGCACGGGCATCAGTGGCGCTATTCTGCGCAGTTGCAGGTTTATTAACATCAGGATCGCTGTTAAA  
GCTGTAGTTTGGCAGTGATTGGCCTGTTGCGCTTTACCACCGTCTTTATCAGCTTCAGCTTTAGCCGGGGTGCGAATTTTACC  
CATGACCGTAATCCCGATGAATACCAAAGCAAGCAGCGCCATCAGTATGACAAAGGCTTTCATACCAGGAGCCGAACGGCGG  
TACTGCCTTTAAATCCGCCACGCTCGCTTTCGAATTCACCGTCTCCGGTGTTTTTCATCGAGTTCCTGATCTACATCGACACTTT  
TACGGGCCATCAGTTATCTCCCAATTTGAACCCTGCGCACATCCGGGGAAGCCGTACCGGTTGCTACCGCACCGGCGCCCC  
GCGCGAAATTATTATTACGAACGCCAACGACTTTATCGCCCAGACGAATACGCCACTCTTAGCGACGGTTTTCCACCTCGATGA  
TGTTGCGGTTCTCACCCACAACATGAGAGTTAGGCAGCGTTTCTTTGCCACTGGCCGAAATCATGTAGACCTGCGGTAECTCC  
GCATTGGCCGGAAACTCAAACCGGGTAAAGCGGTAGTTATCCAGACGTGAACCGGCTGGATGCTGCGCATTTCAGGCTGTT  
CGCTCATTACGTACTGATAGTTCTTCGCCCCGCAAAGCCGTCTGCTTCAGCTTCTGCGTAATGCGTTTTTTATCAGCCGCGCT  
TTTGCTTTTTCTGCTGCTCAAACGGATATTCATAGGTCAGCTGAAGAACGGCCTGGCGCACAGCCCACGGCGTTTTCAATAA  
AGGATTTTGATAACCGTACCGTCTGCATTTTTCTCGTTTTCTCACCGATGAAATGGAGGACGATGTTATAGGTGCGCTTATCGGT  
GACGATCACCGGTTGGTATCACTCATGGCCTGTTTCGGCTTCACAAAAAATGGTTCATTTTGTGCGCAAACGTCCAGCTTT  
CAGAATCGCCAAAAGCATGAGTGATATAGTTTTCGTCAGGCGCGACAACAATGTGGGTAGCCACACCGGCGATAGCGTCAAT  
TTGACCACATTAACAGGGTTATAAACAACGCTTTTTAATGCGATAGTCATAAGGAGAATTGCGGCCAACCTCAAGCGCCATAA  
CGTTAGTGGCCGCGCCTCCAGGACTGACAAAACAAGTCTGAAAGAAGTAGTTTTTTCATGGGGCAGCCCTCAGTTAACTT  
CAGGGTTGACGCGATAACTCGTCACGCGGAAACCCAGCGGGTTGACATAACGCTGCTCAGCATTTCATCGCCAGCGATTTATAT  
TCATACCCATAATGGCAATCCAGCGCTGCGGCTGATCATCAACGGGATTGCTGCGCACGCGGCGAACCGTAGTAAAGCGTAT  
CGTTGCTACGCCGTGCGGTTTTATCGAGGATCACAGAGTTAATCTTCACGCGGGTCTGTTTACTGTGCGCCAGAACCTTATCAA  
GACCGTTGCGGCCCTTGAACCTTGTCTGGTAAGACTCTGCCACGTTGCGCGTGACATTAAGCCAACGGCCGTATAGTCGAC  
CTGAACTGAATAGAAGTCATAGCTCTCACGGTGAATGACATATTGTGTCAGCCAGAACCTTATCAATTTGCTCACCCATAAGAGGT  
CTGGTTCGCGGGTCAGCTTGACCTGCTGTACTTCGTGAGTGGCCTCGTTGAGCGTTAGCAGATGTGCGGGGATTGGCTGGCTG  
TACTTATGCACCACGTAACCAACTAAAGAGAGTGCAAAAACAGTTACCACCGCTGAACCGGTGGCAACCATCCAGGCGGTAC  
GCCGGGACTTCAGCACTTCATCCATCAGATCAACTTCAAGCCCTTACGGCTTTCGTTGAACTCTTTAATGGCTTCACGTGTAA  
GCCCTGTTTTTTTATTAGCTTTCATTTGCACCACCTTGCATCAACCGGGATTGTTTTGTTTACTGGAACGGTGTGCTCCAGT  
CCGGCTCCGGTGGCGGTTTTATGCCCGCTGGAACAGGCGCTAATCAGAAGAACTCCATAAGCAATAAGCTGCGCATTACGGC  
ATCCATTATCGGTTGTTGAACGTACTAATTATAATAAGTCGTCGAAATTGCAATTTCAACGACTTTTTGTTTTAATTTTATGCAGCC  
TTCTTCCCGCGACTGCCCTTGCCTTACCACTTAAATTAGAACCACTGCTTCTCCGCTGTTGCTGCCACTTCTCCACCTGCCG  
ATTGCTGGCCGCCGCACTGTTACCGCCTCTGAACGCATTACCGCCAAACATGCCGTGGCTGCCCATATTGCCAAGCGCCTGC  
ATGGAAGAACCCTGAGAGCGTGCGGCGTCAGCAACTCCGGCGCTGATACCGCTACCCAGCTGGCGGCAATTTGCGGAATCT  
GGAACAGAACGAAAACGAAATGACCGTCAGTAATAAGGCGGAGATAGAACCAGTGATTGATGAGTAAGCGGCATCAGAGT  
TCATCGAGGACAGGAGTTGTCGAACATCTGCATGATGAAACCAAACACGAGCGCAAGAAATGACGACGACAAGGCCATAGT  
TAATGACCGACGCCAGCCAGCGAGCAAAGATGTTTTTTGTCGCTCCCCACAGCAGGCAGAAGATTGCAATCGGGCCAAAAC  
AAAGCGTAACGGCCAGAAGGATCTTAGCCATGATCACAAGCCCCGACCCGAGGCCGCCAGCACAAACGGTAGCAATCATCAT  
AATGCCGCCAATGGCATAACGCGGCCAGGCCGCTCGATGAAAACACGTCTGCGGCTTCCCATGCGGTGTTGACGATCTTGATAC  
CTTTTTCAATACCGCTATCAATAATCGCCGGTACGCCACTTGACCCGACTTTATTAGGGGCAGACAGTATCCCGGCAAATCAT  
CCGGCAGGTGAAGCGCCACGTTGACCAGTTCCTGTTGATACCAGCCGCCCGCTTCAAAGCTCAGGATAAGGGCTATGG  
AAAGATACTCTTTAATCAGCGAACTCAGGCTGTCGCCCGCCCCGGATTAAACGCTGAGTACATCCCCTGAACCATCAGCTTG  
ATTGTCAGACAGGTGGCAATCAGAGGCGTTACATCAGAGATAATGGTGGCAACATTGGCGCTCACCATTGACGTAATCGCCCC  
GTCTACTTTTGCGAAAATGTCTGCGACTAGGGTGAATGCCATATTGCCTCCTTACTCCTAAATTTTCGGTGAATTGATTTGCGCG  
TCTTTTTTGCAGAACACAACAGCTGACGATCGGCTTCGCGCGCGTTTTTTGCAATCAGGTTTCTGAAGTTCATCCGCGTCTTTC  
TTGCATTCTGAATTGTTGCCTTGCCTCTTTCTCATGTTTTTTGTACCACTCCACGTCATGCGAGGCATCGCAGGCCACTAGG  
AGGAAAGGGATAACAAGCAGTAGTTTTTTCATAATTACCTCAGTTAATTGAAGGTGACGCGGTAACGTCCCCGCCGTTCCAA  
AAACAAAATTGTGGGTGGCACGTTCTTCTGCGCACGTAATAGCTTGTCTGTGACTGCTGCAACATGTTTCATCAGATTACAGT

TCGCCTGCTCACCTGAATAGCACCTGTGACGTCTGGATACGGGCCTGTAAGTCAGCAATCGATTTTCAGGTCTGGAGTCGTT  
TTAATCTGCTCCGTCAGCTCCTGCATATCGGTTAGTTCCTGCATCTGGTTGTTGTAGGCTTTTTCTGCCATAACACGGTCATAAG  
CGCCTTTTTTCAGCCAGCTTTTTGTTTCATGTAGGTAATTGCTTCGCTGGGCGTCATGTGCTCAACTTCCGCATTAACCTGGCCCA  
TCATGCTGTTAACTGAAGGCGTGACGGAAGAACTGGAGTTCATGGCGTCGCTGTAGATCTCCTTCCAGTTGTCCGGCAAATTA  
TTTGCCAGCGTGCTGGTAGACGTCCCCAGCAGATCGCCAGGTTGGTTGTCTTTGCCATCGACTCATAATTTTTCTGCGTT  
TGCAGCTGGCTTTAAGCTGCTCCAGCTGCTGCGCCATTTGCTGAAGCTGCTCGACCTGTTTAGCCAGCTCAGTAGGGTTGGT  
CACGATGATGCCTGCGGAAGCGCTTTGCGCGCTCCCAGTATCAGGCCGGTGGTCAGCAACTGCGCGTCAGTGTTTTTTTCA  
TGGTGTTTTGCCTCGTTGTTAAGCCGTCAGGCGCCAGTATTCTTTGAGCCATACTTCAGGGTCATTACCGAGCCGTTCAACCA  
GCTCATGCGCAATTTGCGCGTTTTGTGGTTCACCGGACAACACGCTAAGAACGTTGTCCATTGTCTTAATATCTGCATCAATATC  
GTCGCTGTTGCGAGGGTAGAGATTGAAAGAAGCAATCGCAGACTGTTGCCCTTGTTAACCAGGAACTGTCTGGAGTGTTCG  
GTAATCGACATCAGCGCGTCGTATTACGCATCAGTAAGGAAGGCATAATCCTCTCGGATAGCTTCCGGATCGCGCAGGCAGAT  
TTTTGTGACGGTCTGCGACATGATCGTGCGGCAATACGGCTGGACAGCGCATCGTTCGGCTCCTGCGTGGCAAACACATAG  
ATAGCGTCTTTCTTACGGTCAGTTTTGATAACACGCTTAACTTCACGCTCGATAACCGGATCGTCAAGGTAGGCGTGGAACTCG  
TCAAAGCACTGAATGACGCGCGTTTTGCCGTCGATGGAGTCACGTACCCGGTACAGAAGGTACATCATGAGCGGAGTACGG  
GCCGGGCTGGATACTTCTCTTTGGCTGCGATAAACTCGGATAAATCGAAGCCAAAATATCATTGCGCGCTGAGATCCAGGCT  
GTCTTTATCATTGTCAAACAGCCAGCCATACTGGCCTTCGCGCGTCCATTGCGCGCAGCAGCCCTTTCAGTGATACGCCATTTTC  
CACAACCTTCAATTCACGTACCCGTCAGGATAGTAACGGTGCAGCGCTCGCGTGGAAATAAGTGAAGCTTCCCCCATAACCGCAT  
CAACGCCTTCAGCCAGTTCGGTAGCCATCGTTGCGCTGATAGGCCGTTATTGGTGGTTTTCCACACAAATGCGGAACAGGTTT  
TTAATGAGGGCAATATTGCGTTTTGGTTCGTTCAATCTGAAGCGGGGCAAACCCGGACGGCATAACCTGTTGCAGAACTTTATA  
GTAGCCACCAACGCTTCGAATGAACGGTCCATACCGCGTACGGTCATAAACAAGCCGCGGGTGTACTTCATTGACT  
GCGCCAGCAGGAAGTTAAGCAGCGTGTTTTACCTTCCCCGACATAACCCGTTATTAACGCATGGCCCAGCGGGCGTTTACC  
GTAGGAAAAGTTCTTCAAGCGGGTACATGGAAATTAATAAGAGTGGCGTACCGCTGATCGTGCGAACATGGTCAGCGCT  
GGCCCCACGGTTATTGTCAGGCTTGCACGCATAAAATTGTGGAACGGGCTGAAGTGCAGGAAGTTCATGAGTTTATCG  
GAACCGGGCGCGCGCCATTCTGTTGCCAGGCAGTCTCGCATAATATGCAGCCTCAGAGGCCAGGCTGAGAGTCCCGC  
CAACCACGCCACAGCCGTTAGCATAACCTTCACACGACGCGTTTTGCGCTGTACCGGTTTTGGTCAATATCCCAGACATGC  
ACGGTTCATGATGGTAGCCCATCACGAACTCTTGACGTCAGCATATCGAGCGCGGTACCAAGCTGTGCCAGCTGGCTTTG  
CGCACGGTGCAGCGTTTTCTGCAAAGATTTTTCTGATGCGTCAGAAACGTTTTAGCTGAAGATTGAGAGAGGCAAGAAAA  
CTCTGCGTCAGAAGGTATTCAAATCGGCTTCTTAAAGCATGTTAAGCTGGCCTGGCTCTGTATCTTCTCGTATTACGAAATT  
CAATGCCGGTGGTATAGAAGTTGTGATCTACCGTCTGATCTGGACAACATCCCCCACAGTGAGCTAACAGGGCGGTTGTCC  
ATGATGTAATCACGGATACGATCACGGCAAACAGGCACGATGGCCCATTCCATATTTGCGAGGAAATAAAGGAACTCCAGCGC  
TTTTGAATAAGCGTGAGCCTGCGAAGGTTGAGGCTCGTTGCGTTCGATAACAATGGCTTCGTCAAAAATGTCTGATTATCGA  
CTTCAGCAAGTTCTTACGTTCTTTTTATCAGGCGCAGGAATTTCAACACCGCGTTTTGTCACGATAATAGATAACCAACTGCT  
GAATGCCATACGGCTTCAATGCTTCCAGGATTTGTTTCAGAAATATCTTCCAGACCTTCAAGCGCCTCATTCTGCATTGCTGAAT  
TTCGTACAGAGTCGGCTTTTCAAATTCGCCAGAACTTCTGTGTTTTATCCCCTACCTGTTGTAAATAACGGTCAGATAAAG  
GTCATTAATCAGCTGCTTGAATCACCGTGCAGCTTACGGTTATATTGATCAACATAAGCAGGGAAAAAATGGTCATACTCACC  
ATCCGGGTAATCTTTAGCCTCATGGTGATATTATGCGTCCACAGCTCTACATGGTCTGTTCCGAAGCTCTTGACCAGCGTATTA  
AGGTCTTTATGCCAGGTGACCAAGTTCCCGATCTGATGCGCAGTCATGTGTGCGGCCATCCAGCTTGAAAAAAGCCATCAGATC  
GCCGTTTTCCATCGAAATCACGTAATCATTGAGGTGATAAGAATAGGGCAAATACTTTTTATTTACTGATGGCTCCTTACGGTAG  
GCATCAATTTTTTTGGCTTCGTAGCGGTGGCAGCTCTCATTATTTAAACCTTACGTTTGTAGTCAACAGAGGAATAAGACG  
ATCCTCCCCACTGCTTAAACGGAGAATCAAACCAATTAAGTGAATTTGGTTTTCAACCACAGGCCATAATTCGAAACATGCGGT  
CGTCATATTTTGTAAATGCAGCTGAAGGAATCCACAAAAAGACGAACACCAGGATCGCCACATATGAATAATCATAAAAAAGC  
GAGGCAGAAATCATGAATATCATCATAGCTACATTACGTGGTACACCCAGCGCGGAGGTAAGCGAGTCGCACCTTTGAAAA  
GCGGTCTTTTCCGTCAACGAACATCTTTGTAGTCTCACTTTGGGGGACAAAAGTCCCCCTTTTTCGCGTTGTTTCAGCTTCC  
TACGCCCGTCAGGGAAACCAGAAATGATGCAGAACCAATACCAATCAGCGAGATTACGATACGAGGAATAAAGCTGGCTGGG  
ATTACGTGAAGCATCCACATAAAGCAACTAACCATGATCGCAATAGCACAACCAATTGGAATCCATGTGCTCAACCAGTCTGG  
ATTGATGTAGCGGTTGATTACCAAGTATCGGTGCCAGCGGCCAGCGCAATTTGCGGCAGGGCAATGGACAAAACGCCCATAA

CTACCGCAGGGCCATACTTCTTAAACAACGTGGTCATACTTTCTCCTTACTCACTATCTTCTGTTGATTGCAGATTTAACCGGCA  
TTCTTCAACGCCACACTTATCTTTCAAAAACCTCTGCCAGTAGCCTTAAATCAGCCCAGGTTTCGTAGTTCATGCTCTTTGTTAACC  
CGAATGGAACATGCGATCTGGCCCAACTGTTTCATCGTCTATCTGAAAAACGGGATACCACGTCTTTAATGAAACCCGTTTTATC  
GTTACCTCCTTCACTTTTCTGTTTCAAATAGCTCCAGGATCTGTGATTGCAATACAAGGTACAAACGTTCCATCCATAACCTCA  
CTCCCCCTTCGCTGTTTCTGTTTGGTTAAAAAGGCATCCGTATTATTCGGCTGAAGGCATCGCCATCACCCGAACCAAAAAC  
ATCTTGTTACCGTCATACTGCGTGGCCGTACTTTTTGCCTGCTGAGGCTCAGTCGCGGTGCTGTCCCTCACTGGTCTGGCCATC  
AGGTAGCAGCGTAGGGATTTTCAAATCAGTTGATTGACGCGCCACGTTGATAACTTTTCGTGACATACCCGTTAGAAATCCCGT  
TTATGAGTGAGCCGGTGTGTAGCAGGAAAGCGCGTGTCTCAGCGCAACCTGCCCGGCTGGATAGGATTCAGGGCGCTATC  
ATAACAGGCTTTAAGGATGGTCTGGCTCGCCCGCAGGTTGATGCAGGGCTTGAAAATATCGTCAACCGAAAGACCCAGGCCC  
ACTAAATTATTTGAGTTAATTTGTGCAAGGCCATATCAAAAACCTTTTATTATCCTTCAGCAGAACTTTTCGAAACGCTGACGGCCT  
CAGCTTCAGTACGTGGTTGCTGTTTAACTGGGTACTACCACCGTTAATATTGATCCTGTACGGCCATTGAGGACTCATGGC  
CGACGATGTACGCCATTGTTAAGGGTCAAACATCAGGCGCACATCTCTGCGCAAGCCTGGCAACTTCATCTGAGGCAGGCGC  
AGCACTGGCACGGCCAGCACAAAGCAAGGCAGGCCAGAGCGAGAACCAGAAGTTTTGGATGTTTACTCATTTACGTTTCACC  
GCGTAATTGTAATTTTCGACGACTTATGTTTATGATAAGGGCTAATGAGATCGTGTCAAGAAGAAACGAAAAGAAAACCTCTGA  
AGGAAGGAAGGTAATGCTGGTTCCCCTGAAATCAGAAAAACGCCCCAAAGGTGAACCCATGTATCGTGACCCGGATAACCCCT  
TTAATACGTGGACTGGTATAGGGAAGCGCCCGCCTGGCTAACTGCAAATTGGACGCTGGCATTAGCCTGGAAGCCATGA  
AAATGCAGGGCGTTGCCAACCCAGAGAACATAGACAAGTAAAATACCGCGACCCAGGAACGCAGAAAATACCTGGTCCG  
GGACTGGCCGCCGACCAACATGGCTCAAAGAGCTGCTTGATAGTGGTTTATCACTTGATGATCTAAAGATATAACCGGAGAGT  
ATAAAAATGGGCGATGTTATTGATTTTTCGCGAAAAGCAAAAAGGCAGAAGGAAGAAAAGGCATTTTCCATTCCGCCCATTT  
TAAGAAAATCCGAGTCCATGCTATCAGGTTACTCGCCAGCATCATCAAATCCGGCTCTTATTAGTTGCTTATATCGTTAAGAA  
AATTACAGGAAAGTTAATTAAGTTGTTTCGCAATGTTAACGATTTTCGTTTTTATTGTCGAATATATCGCAGGCGATATAGGTTAC  
AAATCTATTTATAACTCTGCGTTATTATTAATATTACTTACCGTTATCAACATTCTGGCGGGTGTATATCTGAACAAACTGTTAAGG  
ACAAAACAATGAAGAAACTCTTAATCCCTCTGATAGCAGCTGGTAGTCTGCTTTATCTTCTGCCAGCCATGCTGAAGATCCCT  
GCAAAGTTATTATGTGCATGGCGGGCAAGCTCACCGGCGATAGCGGCGGAAGCGAGTGTAACAGTGCTGAAGCTGCTTTCTT  
CAATATCGTTAAAAAGAACAAGCACGGCTTTTTACCCAACCACACGAGGGATGCCAGGAAGGCTTTTTCTTAATGAATGCCCG  
GATAATGGCGAAGGTGGAAGTAACAGTGCATGATAAGCCAGATCATAAGTAAATACGGGAAAGTTCGCTTATAGGCGGGCT  
AGGAATAATCTCAATTTAAGGAGCCAACGTGAAAAAAATTATATTAAGTGCATTAGCCTGTACAGCTCTCTTAACTGGTTGCGT  
CAGCCAAGATAAAGGTAATGCGATGCAGAGCCAGATGAATAACCAGCAACGCCAGATTAACGAATTATCCGTTTCGTTTGCAGT  
CTGCGGAGTCCCGGCTATCAAAGCAGGAAGAAAAGCTGCGCAACGAACTGCTGCAATCCAGCGGCTATTGCTATCTGAATGG  
CGCCCGCTACTCGACCGGCACCGTACTTTACGGGCGGATTTGCCAAAATCAGTCAGGCAGCGCTTCGTGGCAGGTTTACAGC  
CGTCGCTAAACACCAGGGCGGTTTAAACCGCCCTTTTCTTTACCCACAGAAAGCACACTATCACCATGTTCCCCTTCCCCACTAC  
AGAAAACCTTATTCTATGGGCTTGCAGCGCCATCGCACTGTTTGCCTGTTGATTCTTCCGGCGTTCAGTACGCAACCGACGAC  
ACAAAAGGAAGCAGCAAAGTGCAGCGGCGGGTGTGAGGCGCATAAAGACGTTGCCGGGCTTCCACAAAAAATTAACTAC  
CTGAGGAAAATTGATCCTTTTGTGTTTGAAGAAGTGTGCTGGAAGGATTTGAAGCGCATGGCGGCTTTGTTGAATAAATCA  
GATTTCCGGTAAGTCTCCCCGTAGCGGGTGTGTTTTTTCAGGCAATACGCACGCTTTTCAGGCATACCTGCTTTTCGTCAATTTGT  
TCAGCGCTCGTACCAGGGCCATAGCCTCTGCAACCTGACCATCGTAGTCACGCAGTGTGAGTGAACCTCCGAACAGCTGTTTT  
ACCCGGTACATCGCCGTTTCCGCTATCGAGCGACGGTTATAATCTGTTGTCCATTTCCACCGCGCATTACTCCCGGTCAGCCGC  
TGATTTCGCAACAGCACGGTTACGGTCTGCATATTACCCGGGCCAGTAACCCGCGCCTTTTCGGGGCGGGATAAGCGCGCTGA  
TTTTCTTACGCCGAGTTCATCGTGACAGAGCCGGGTGTCGTAAGCGCCGTCTGCCGATGCTGCCCTGATTTTTCTGTGAGTC  
TGCCGGATAAGACCCGGGAAGGCTTCTGAGTCCGTACATTGTTTCAGCGACAGGTCTGCACAGATGATTTTCATGTGTGTTGCT  
GTCAACGGCCAGATGCAACTTTCCCATATACGACGGCGTTCTTTGCCGTGTTTTTTGACTTTCCATTTCGCTTACCAAAAGAC  
CTTCAGCCCGGTGGAATCAATACCAGATGCGCGATTTACCCCGGGTGAACGTTTTTGAAACTGACATTAACCGACTTTGCGC  
GCTTGCTGACACTGGTGTAAATCCGGGCAGCGCAACGGAACATTCATCAGTGAAAAATGGAATCAATAAAACCTGTGCAGC  
CCGCAGGGTTCAGCCTGAACACGCGTTTAAATGACCAGAACGGTGGTGTGATGGCGAGATCAGAATAGCGCTGAGGTCTTCCCGG  
TGATGAAGGCGTTGCCGACTCATACCAGGCCTGAATAGCTTCATCATCCAGCCAGAAAGTTATGGAGCCACGGTTGATGAGG  
GCTTTATTGTAGGTGGGCCAGTTGGTGAATTTGAACTTTTGCTTTGCCACGGAACGGTCTGCGTTGTCCGGGAAGATGCGTGA

TCTGATCCTTCAACTCAGCAAAAAGTTCGATTTATTCAACAAAGCCGCGCATGGCTTCAGAACCATCAGAAACAAACGCTATAACC  
GGCGATGGAGGCATTGACGGCCAGGTAATAATAGGAAAATATCGCTATCTTATTCAGGCTAAACGCTATCGCGGCCATATTGCT  
TTACAGCACGTACAGGAGTTCGAGAAGTTGCTTAAACGTCATAACTGTCGCGGTCTGTTTTGCCATACCGGGAAAACCGGCG  
CAGGTTCAAATCTGTCAGTATTGCCAGTGAACGGATGGAGATTATCAGCGGCCAGCGCCTGATAGATTTGCTCACGCCCGGC  
AGCTCCTTCACTATCGCAACCGCCCCGACGATGATGAAGCGTACCGCAGCAACACTAGAAACGAGCACCATTGTTAAAG  
ATGCCGGTAAAGAAAATCGATACCATGAGAGTTAATTAATGAAGTCAGTAACTATAGAAGCAAAAACATTTGCTGAAATGTTA  
GGAATAACAGAAGGTGAATTAATCTTTGCCATTAAGAAAACCTGGCACATTCAAAAACAAGACCATCCCACAACCTCATGAGCC  
ACATAAATCAAATAATAGATTTTTATATTAGACGTAATGAGGTTTATAGAATCACTAAAAGACAAAAGAGAACCGGTAATGACTC  
CAACTTACTGATAGTTTTTATGTTAGATAATGCCCCGATGACCTTGTTCATGCAGCTCCACCGATTTTGAGAACGACAGTGACT  
TCCGTCCCAGCCTTGCCAGATGTTGTCTCAGATTCAGGTTATGTCGCTCAATGCGCTGAGTGTAACGCTTGCTGATAACGTGCA  
GCTTTCCCTTCAGGCGGGATTACACAGCGGCCAGCCATCCGTTCATCCATACCACGACCTCAAAGGCCGACAGCAGGCCAG  
AAGACGCTCCAGCGTGGCCAACGTGCGTTACCTAACATAAACCTGTTAAATATCCAGATAAAAACATTCAATCTGGGTCAA  
TGAGTGATACAGTTTCACCCATAAGACCCAATGGAGGCAATATGTCTGAATTTGAATTACTGGCGCAGGATCTGCTTGAGAAA  
GCAGAAGCGGAAGAACAACACTGCGACAGGAAAATTATAAAAAGCTGCTCGGGCAGGTGCTGGAAATCTATGACCAGAAGTAC  
GTGGCTGAACTGCTTAGAAAAGTTGGTAAAAATGAGTGGAGTTCGCGAGACTCTTAATCGCTGGATTAATGGTAAGTGTCTCAC  
CTAAGACGCTGACGTTAGCCGAAGAGGAACTTCTACGAAAAATGCTTCCGGAAGCGCCTGCACATCACCTGACTATGCCTTC  
CGTTTTATTGACCTGTTTGCTGGGATTGGAGGTATACGGAAGGGCTTCGAAACCATCGGTGGCCAGTGCCTTTTTACCAGTG  
AATGGAATAAAGAGGCTGTGCGCACATATAAAGCTAACTGGTTTAAACGATGCTCAGGAACACACTTTCAATCTCGATATTCGG  
GAAGTCACGCTCAGTGATAAACCTGAAGTACCTGAAAACGATGCCTATGCTTACATTAATGAGCATGTGCCGGATCATGATGTA  
CTTCTAGCAGTTTTCCCTGTCAACCGTTCAGCCTTGCGGGCGTAAGCAAGAAAACTCGCTCGGGCGCGCGCATGGTTTTCG  
AATGTGAGGCTCAGGGAACGCTTTTTCTCGATGTGGCGGTATTATACGCGCAAAAAACCTGCCATCTTTGTTCTTGAAAAC  
GTTAAAAACCTGAAGAGCCATGACAAGGGTAAAACCTTTAAAGTCATCATGGATACCCTCGACGAACTGGGCTATGAAGTTG  
CGGATGCAGCTGAGATGGGCAAAAACGATCCTAAAGTTATCGACGGAAAGCACTTTTTACCTCAGCACCGAGAACGTATCGT  
TTTTGGTTCGGTTTTCCGTGCTGATCTGAACATTACCAGGGCTTTACCCTGCGCGATATTAGTCGTTTTTATCCGGAACAGCGTCC  
GTCATTTGGCGAACTGCTGGAACCCGTGGTTGACAGCAAATATATACTGACGCCGAAACTCTGGGAGTATCTCTATAACTACGC  
CAAAAAGCACGCAGCTAAGGGTAACGGATTTCGGTTTTGGCCTCGTTAATCCTGAAAATAAAGAAAGCATTGCCCGTACGCTT  
TCTGCTCGCTATCACAAAGACGGGTCTGAAATTCTGATAGACCGTGGCTGGGATATGGCCACAGGTGAAACAGACTTCGCGA  
ACGAAGAAAATCAGGCGCATCGGCCCGCAGGCTGACTCCACGAGAGTGCAGCGCGCCTTATGGGTTTTGAAAAAGTAGATG  
GCAGGCCTTTTCGATTCTGTGTCAGACACTCAGTCGTACAGGCAGTTCGGTAACTCCGTAGTGGTGCCCGTGTGTTGAAGCC  
GTAGCCAAACTGCTTGAACCTTATCCTGAAAGCGGTTAATGCCGATTCTGTCAAGGTTGAACGAATCTGATCGTCCCTCCCG  
GTATTTATGCCGGGAGATAATCTATGGAATATCTGCGTAAAGCCCTGTCAGCTCAGCAATAAACGCACCTAGCGTCAATAGCTC  
AGCTCTCACCGCCTCCGGGTATTTTTGTGTCAGCGATGATGGCACAACCAATCTGACACCCGACTCCCGCATCTCCCGATATTG  
AGCCAGAGAAACTCCCTCTTGAGTGTAAACAGATGCACCTGATGAATTTTATCGGCCTCATTAGTATCTGACGCCAGCGAT  
CCTTACAGGTAGTCTTACTGCCAGCATGCGCAGATTTTCTACGGGAAACTCAGTATCGTGGTAAGCCCTGCGGAAGGGAA  
AAGGAAATCGGGTTTTTTTATTACCTTCTGTGATGGCCTGCGTCGAAAGTGTGCGAGGCCGTGCTCAATGAATAGATGCTCCA  
GGTGCAGTTCAGAGACTTCCCGGCTCTGGATTTACGGCGATTGCTGACAGAATTGGCCAGCGCAATAAATTCATCCACAGA  
GCCAAATCCTTTCCGGATGATATCCAGAACATGCAGTTCCTCAACCAATAGAAATATGTCGTACTCCACGCGCCGGCGGTCAAG  
AAGTTGCTCATCCGGATCAAGGGAATTTTTACATAATGGCTGGCTGCATACTGAATAATTTCACTTCCCGACGGAAAGCGCA  
GGTGCCAGTCTCAGGTAGAATATATTTATGATTTACTGGCGCTTGTGTAGAGATAGTCCGCCTAGAATCTGTCTGCGGGGC  
CGGATATAAGCGCTCCGGGTATAACTTACCAATAGCGGTCTCAATGACGTCCTTTCATCAGTGCTGGCGCATACCCAAATATT  
TACTTCCTTACAGTCCCCCTTGTCTCATCAAGCTTGAAGCCAGGAGCGTCAGAGCCCCTGTATTTTACAGGATTCTGAAGTG  
GGCTGCCTTACCCAGCGGGTAATCCTTTTTTTCATTCCGGGTTTTACCAAATGACGGCTGTTATAATAAATTGCCCGGGCTT  
CGCTGTCAGGGCAATCATGCGATGACACATGTGCGGTGAGAAAAACCGAAGGGTTCAGTTCACGGGTATGGTTGATAGACG  
GAAAGAGTTTTTCAACGATACCTGAAGGGATATAAAGCCCTACCTGGTGACCACCTGTTGCGCCGGTATCGTTGGCGGAAAG  
GCGTTTTGATGTAGACGAAGTAATTCTCACATGCGATCTCAAGTAGCCAGTTGTGGAAAACCGACATAAGCATCCCCTGTTACCC  
TGAAACTCTACTCACCATTTTTTCATGATTATATACAAACAGCCAGAAAGGCTGTTACAGACGATTTGATCTGCAACCTATTGGT

TAAATTAATGTATCAAAAACGATGGTTTTTGTGACAGTCTTGAAAAGTCCTGACTTCTCCCGAAAAATGACTCCCCTCATGTAA  
CAAACCTCGTTACTGTATCAACATAACAATAACCCATAACTAATTAGCGAGAAAAGAATGAAAATCGGCTATGCACGTAAATC  
GGCACTGTTGCAAAGTTAGCGATGAGGCAGCCTTTTTGTCTTATTCAAAGGCCTTACATTTCAAAAACCTGCTTACCAGGCGC  
ATTCGCCCAGGGGATCACCATAATAAAATGCTGAGGCCTGGCCTTTGCGTAGTGCACGCATCACCTCAATACCTTTGATGGTG  
GCGTAAGCCGTCTTCATGGATTTAAATCCCAGCGTGGCGCCGATTATCCGTTTTCAGTTTGCCATGATCGCATTCAATCACGTTGT  
TCCGGTACTTAATCTGTCGGTGTTCACGTCAGACGGGCACCGGCCTTCGCGTTTGAGCAGAGCAAGCGCGCACCATAGGC  
GGGCGCTTTATCCGTGTTGATGAATCGCGGGATCTGCCACTTCTTACGTTGTTGAGGATTTTACCCAGAAACCGGTATGCAG  
CTTTGCTGTTACGACGGGAGGAGAGATAAAAATCGACAGTGCGGCCCCGGCTGTCGACGGCCCCGGTACAGATACGCCAGC  
GGCATTGACCTTCACGTAGGTTTTCATCCATGTGCCACGGGCAAAGATCGGAAGGGTTACGCCAGTACCAGCGCAGCCGTTT  
TTCCATTTAGGCGCATAACGCTGAACCCAGCGGTAATCGTGGAGTGATCGACATTCCTCCGCGTTTACGCCAGCATCTCCT  
GCAGCTCACGGTAACTGATGCCGATTTTGCAGTACCAGCGTACGGCCACAGAATGATGTCACGCTGAAAATGCCGGCCTTTG  
AATGGGTTTATGTGCAGCTCCATCAGCAAAGGGGATGATAAGTTTATCACCACCGACTATTTGCAACAGTGCCGGTCGCCGG  
GAGTCAGCAGATCGACGTCAACGCCGAGCAGCGATTTTCAGTTCTTCTTCAAATCGCCCAAGTCCAACAACGTGGCACCGGG  
CAGCGCATCGACCAACAGGTCGAGGTCGCTGCCATCCCGGTCGGTGCCATGCAGCACCGAGCCGAAGACGCGCGGGTTCCG  
GGCGGAAAGCGGCCTACCGCTTACGCACTGCGCTTCGTTTTCATGTCAAGCACAACAGACGGTGCATGCGCATCCTTTCT  
TATCGAAACTCGTTGAGATGATATGCAATCAAGAATAGAATTTCAAGAACTCACAAAGTAACGCGGTGGTTAATATCCTGTACC  
CACGGATTGCCCTTAGCGCTGCCTATATCGGCTAAAGCACTCCGGTAGCTTGATTCACCCACGGCCACGGCAGGATCTTGGC  
CGTCGCAAGCGCCAGGGGAAAATCTTACGCTGCAAGCCTGAGTGATTTTATGTGCGTGAATCCATCGCCCAGATGATTTTTG  
TGAAGAAGAACTCGCGCTCGTTTTCATGTCGGGGCGCGCTCCTGGCCCTCCGTGCCAACGGCCAGCAAGTAATCGGCCTGAAT  
TGGCAGTATCAGCGCGCTAGTAAGTCATGGATCGCCGTTGCGGCAGTCTGCGCGCCAGATTAATTACCCGGTCAACTTCA  
GTTTATCCTGCTTGCCTTGTGCGTCTGCTCCATCAGATTTTTCATGGCCCCCTTCTTTCATGCTCATGCTCATGGGTGTGTTCTTTTC  
CGGTATGGCTCTGTTCCGCCTGAGACGTCTGCGGCATGGCGTAATCGTCGTAAATGCTGCTGTCAAAGTCGTAGTCTGATGCTT  
CGGCATAATGCTCGTAATCGGCATACTCCTGCGCGCTCCACTGCTGATCGTCGGCAGCAGCATAATCATGGGCCAGCTCTGCAT  
CATTTTGTGTGCTTCATGACGCCGAGGCCAACGGAATCATCCATAGGGTTCTGCTTAAAGATGAAAGGCGTCTCTGCGTTG  
CTCACCGGCTGATAATCAGTGCCGTTTGTATGTTTTCATCGGGTTTCTGGTTAAACGCCATGCTTTCCCCCGTGGCTTCT  
GGCAGACCTTTTTTTCAGCTGATCGGGTTTCTAAACTGGTATCGCGGCCAATATCCTTAAACCTGGCCTCAAGCCCAAAGAAACG  
GTCAATTTCTGCGGCCGTGGTTTTTTCGGGCTGTGCGGGCTCACGCTCGATGCCAAAGATTTTTTATCGTCGGTAAAAATTTCCAC  
CTCATGACGCGCACGCGAAATACCAACATAAAAAACGTCCTTAGAAGTGGAAGCGATTTGGTATCTATGTTGAACAACACGC  
GATCACAGGTAAGCCCTTGGGATTTGTGGACGGTGGTTGCATAAGCATAGGAAAGATAAGAAGCCTGTTTTTTGTCCAGCTC  
AACCGTGCGCCCTTTTTTGTCTCAAGCGTCAGTTTTTACCCTCCACGGTTTTTACCCTGAAAGCGGTCGCCGTTGGCAACGT  
CCAGCGTTTTATCGTTACGCGTTACCATAACCTTATCGCCCGCGCCAGTTCGGCGCTGACTGCCTGGTATACAGACAGCTTGG  
TGTGTGTACGCGGGCTGAAAGCGATCTGCTCACCGCTGCTGCTTTCAACCGTCAATTTGTTGCCCGGCCCGGTATCAAGAACC  
TGTAAGACTCGCCCCGCTTCATACCATTTTTGTAATCCTGTTTCGGGGATAATGATTTGCCCTTTACTGAAATAACGGCTGTGCG  
GGCGTTCCGCCTGTGTGAATCCACGCGGTCAAGTAGCGTGAACGTTTCGCCGTTCCGGCAAGCCCCAGATTGCCCGGAT  
GTAGTCATTGAGGGTTTTGCGTGAGGCGTTTCGTACCAGAGATTATCAGGGTGGCATCCTGTTGTTCTGAGGACAGAGACAGG  
TAGCGATCGGCAAGTTGAGCGAGTCGGGGCGCTTCTTCTTTCAGTTTCGTTACGCCGGTGATATTTTTTACGGGCGCGCGCGG  
CATTACCTTACGCGGCATACTTAACCGCCTCAAGCAAACTTATTCTTCTGTCGCTGAATGTCTTTTTCATGTAGCTGGTCTGCAT  
ATCTGCTTTAATCAGCTGCTCAAAGGCTTACCAGCTTCTACCGCTTTCGTCGTGACGATCCCCCAGGAATACCAGCGCGAGC  
GTTATGCTTCTCGATCACCTCCATCAGCTGTTTTCATCTGTCGGGCGGGTATAACCCCGGCTTTCATCAATGAATACGACTGATTTT  
TCATCCAGCTTTTTATCCTTCGCTTTGAGGAAAGCGGCAACGGTGCGGGCCGGTAATCCATCATCTTCAAGCGCTTTTTTCTGT  
GTCCCATAGGGGGCCAGCGCCGTGACCTTACGCCCTTGTGACTCCAGCAGCTCTTTAGCGGCCATCGTCATATAGCTTTTACC  
GGTACCGGCGTAACCATGTGCGGCCACAAACCGATCTTTGCTCGTCACAATTTCTGTAACCGCGCGCATCTGCTCCTTCTTGGAG  
GGTTTTTCCCGGCAAGCAGCTGGCCTGCAATCTCTGCGGTGAGCTGTGCGGCATCTGCCCGGCGCGGTGATTTCGATAGTC  
AGAATGGAACGCTCAAGGCGAATACCCTCCACGGTAGTGACGCGGTGGCTGGTCTTTTTAAGCCTGCCGTTTTTAATACCATC  
ATCTACCGCAAACGGGCTTTATCCGCACGCATCCCGCTATTTCGTGAGCGAGTCGATCCACTCTTTGCGCGTCAGAGTTTCGG  
CCATAACTGAAGCACCGACCTTACAGAGTTGATTGATACCGGGCTTCGCCCTCGATGATGGCGCCCTTCTGTACCGCCTTACAGG

TACGCTTTTTCAACATCGGCTATTGTGGCATGGCCCAGCACCTGCTTATTAGCGATTTGAATCAGCTTCTGGCGTTCAAAGCTG  
GCATCGCGCTCTGACAGCGACTTAACTGCAAACCTGGATAGCCCGGTGAGCTTTAACCTCCGGGCTGGTAAAATCCGGGGCCA  
TGTTGCGCGCTATATCAGCCTCCAGAGGTTTACCGTGTCCCTGCCATTACGGTTATCAAATCAATGCCGAGCGTTTTGGCGC  
GGCTGGCCATTCTGGTGAATTTCTTACGGGAATGCTCTGTTTTCTTTTACGCGTAGCCATCGAGACGCGGCTTTTTCGTCT  
GAGCATCGGCGGTTTTCCGCGTCAGACCCATTGCAGCGAGTCCCTTTTCAATTTGCTCCGACCGGCGGGAAAAAGCGCGAAT  
CTGTTTCATCTGAAAAATGGGCCATATCGAACGTGTTATTTTTGCTGTTGTAACGCAGCTCATAACCGGCTTTGGTCAACTCAA  
CGCCAGCTCCTGTTTGTAAACATCGCCCAGGTGCATTTTGTACGCATCAGCTCATTTTTGAGCGCGCGCCACTGGCCGTC  
CTCGCGCTGGGTGATGTTTCATGACAAAAGCGTGTGTGTGCAAATCAGGATCTAGCGCCCTGGAAGTTTCGTGGCGGAAAGTA  
GCGACGACAAGGTTATTGGTATTCTGGGTTACTGATTTCCCCTGGCGAGTCGTCCGGCCTGCGCGAGTTTTTCAGCTTCAG  
CACAGCAGCGGCAACAGCTTTTTTCATGAGCCTCGATAATGTTTTATCGCCGTGTATCAGCGCCTGCATGGATACCCCTTAGG  
CGCTGAAAACGTCAGGTCGTAGCCAGACGCTTTTTTTGGCATCACCCACGTGTCGCTGCATATGCGTGAAGGTATCTATCTC  
TCCGACAAGCAGCTCTTTAAACCGGGCTGATTCAACGTCCCGGATAAGCCGAGGGCTTCAGCTCCGTTCCCTGCCAGGAC  
GTGAATGATGAATCCTTACTGTAGTAATCATCTTTGCATCAGAGTAGTAGCCACAACGCTAGTGACGTTCTGGCGGGTAATC  
GTGGTTATATCAAGCATCAGATCTCCCTCAGTTCAATGCCAGGAACAGGGTTTTTGCATGGTATTTAACGTGTTTAGCCTTGA  
ACTTAGCGACGGGCATATCACCCAGGCAACGCCAGATAGCCGGTGAGGTTTTGGCAACATTGATATTTCCGGTAGGCGTTACGGC  
ACGAACAACCTTAAACGTCGCGGCGTTTACGGACAATCCAGGGCTTCTGAGGATCGGATTCTTTACGCTCAACTTCGCCTTCTA  
TCTCACCGAGTGAGCGCGACATTTGATCCAACGTTTCATCACCGAGACGGCTGCCGCCAGCACGATGTTAGAACGCATGTTA  
GCCAGAATTGTCTGAGCCATATCCCGACCATAAACCTTAACCAGCTGAGAATAGTTTTGATAGCCAGCATAAACACACAGACC  
GCTTTTACGCCCTTTGGTCAAGTGCATCGTTGAGGTTTTGGCAGAACTGGAGTGATTCCAGCTCGTCAATAAATACATTAATGC  
GGCTTTCTTTTTACCCATACCCAGCACGATAGAAAAAATCGAATCCAGCCAGCAGGAAATTAGCGGATTAAGTGACCTTTTC  
ATTTCTCCTGCCAGGTGATAAACAGGGTTCCCGGCTTTCCATCATCAAGCCAGTCACGCAGGGAAAAAATTACCTTCCGGCAT  
TTTCAAATGTGGGGCAAGATTCTTACTGAGAACAAATCGCGCGCTTCCAAGTCTTTTTTACGACCCGGAAAAAATAGCTTCGG  
CAGGCGTCCCATTAATAAATCTTTTTAATTTTTTCTGGTCAACGTTACAGGCCAGTGAATAACTTCTTCCATAGTTACTGTGCT  
GTATAGGCTGTGAAGTTTTTTTCAAACCTTACTAAAAATAAGACGGCCATAGCCGAACCATTCTTCAGTAGCCATATCAGGGCT  
TTCCTGAACAATAGAGTTCACTAACGCTCGTAATCATATGAACGGCGAATTTTATTGAAAAACACCCAGCCTTCAGTGCCTTT  
ATCATAGGCGTTTTAAATAACATCGCCGGGACGATAGAAATCTTTAAGAACCCCCATTGGATCTAAAGCAATATTTTTGCC  
GCCTCTAATGATGCTCTTAAATAACAGTTCATTGAAAATTGTGGTTTTACCAGTACCGGTTGTACCGGCAATCGAAAAATGCAA  
GTTCTCAGCGTATGTAGGTATGGGGATATTAGCCACGGTTAACTGGTTGACACCTCTTTTCGCGTGTTTTTATCAGCGAGTGTCT  
GGCGGAACAAGCTCTGTACCACGATAAATCTTTTTGAATCTTTGCCTTTAAACACGCGTGATTTATCATAAATGATAAAGC  
GATCAGACCGCCAACACCAATAAACAGCCAGCAATTAAGCTGACCATAAAGGCCATAGCGAAAAAGTATTCTTAACCAGAT  
ACGGAATCAGGTATTTAGCCGTGGATGGATCAATACCGTAGGTAAATTTTCAAACCTAGAAACCATAACCATCACTGGAGGCAAA  
GTAATTGCAAATAAAAATGCTAAGCCTCTTTCTCTATCGTCCATTTACGCGCTCCTTTTTTGGTTCCAGACTTTGTAGCCGTTA  
CGTTCAACCTCTGCTTTTGCCTTTGGTTTTGCCGTTCTGCTATCGAGCGCAGGAGGATTAGCGTTTTCAATAGCGAGTGA  
TTCATGCAACATCATCTGTCTGCGGTTGGGAATTTTACGCCAGATAGCGTTTTGGTTATTGCCTTCAGCTCATCGCGCAGTGG  
GCCAAAATCCGCATCTGAAGCACGGTCAAAAAGATAATCCAGTTTGCATTTACGTGCTCAGCCGGTCCGCAACTATTTTTCA  
ACCCGGACTCCCGATCACCTGGGCCAGCTTCAATGCAGCGCCGAGATAATCTGACCGATTACCTCCTGAAACCAGGTCTATAT  
AGGCCAAAAGTTCATCTGATACTTTTGCCTTATTATTGGCATTACAGTCTCACATTGTGCATTTCTTAAACAAAAAATTGGGAT  
CTAACAAGCTGAAATCTTAGTATTACCAAAGTAATAAAGCAAACCTCATTATAAAACAATGGGTTATTGGGTGTTTTTAACCTA  
ATTATTACCGAATATTGACGCTATTTATTTTTTATCTTTTAAATCAGTACGATAGCGTGATTTATCGCGCTGCGTTAGGTGTATAG  
CAGGTTAAGGAAAAAATCATCTTTTTTGGTAGGAGCGACCTCCGTAGGTTAAGGGTCATTTGGCTAAAAAGCGTCTTATTC  
TTTGATGGTCATGCTTGCATGACCATCTGAGCAACCAAAAACCTACAGATAAACTACAGAGAACTACAGATAAACTACAAAA  
ACGATTTACCTTAGCGTTGTCAGACTACTAATAGACTACAAGGAACTACAAAGAACTACAAAGAACTACAAAGAACTAC  
AAATAGACTACTAAAACCGTGGCAGACTACTAATAGACTACAAGAACTACAAATAAACTACAAAACCTGGATTGACCCCTTCT  
TACGAGTGTGTAGAGTCATCTTCATAACAACGGAGGGGTTATGAATAAACAGCAGATCTGAAACCCCGCAACTTATCGGCT  
GCTGTCAGATTGCGCCTAAATGAAATCGAGAACTGGCTGGACAGAGGGCTAACGCGGCATGAAATTGCTGAAATCCTCGACA  
GCCAATACAGCTTTTCGGTAACAGCCAAAGGGCTTGAGATGGCACTGTATAGAACGCGGCAAAACCGAAAAAATGTATTGCA

CAATACACATGATAAGAGTAGCGCGAAGGGTGCAGCGGAAAGTGTATTGCACAATACACAACCGTCTGAGCCTGAAGCGCA  
GGAAAGTGAAAAAGCAGAGAGTCCCAGCATTATTGATAAAGAGTTCTTCAATAAAATCGGTGAGGATTTCAACCCTAAGAAG  
TTCAACAAAAAATTCTGAGGTGATTTATGAAAGTAGCGGTAATTAATTACAGTGGCAGTGTTGGTAAACATTAATTTTCATCTT  
ACCTGTTAGCCCCGCGCCTGACTGGTGC AAAGTTCTATGCGGTAGAGACTATCAACCAGTCTGCTTCCGATCTGGGTATTGAA  
AATGTGACCAGTTTTAAAGGTGACA ACTTCTCACGTTTGATTGAGGATATTGTTTTGAAGATGCAGGCATTATTGATATTGGC  
GCGTCAAACGTTGAAGCGTTCCTGATGGCTATGTCTCGCTTTGACAGTGGCGCGAACGAATTTGATAAATATGTAATCCCGGT  
GACGCCGATAATAAGGCGATTGATGAAAGCCTGAAAACGGCACACACGTTAAGTAAAGCGGGCGTGAGCAGCAAGAAAAT  
TATCTTTGTTCAAACCGTATTAGTCCAGACAGTGAAGTAGAAGATGTGCTGGCGCCGGTGTGTTGAGTTTGTCAAAGAAACGA  
AGATTGGCAAATAAGCAAGAAGGCTGTTATTTATAACAGTGAGTTTTTCGAATATCTGGCGTTTTACCGTATCTCATTGCAAG  
TATTGACCGCTGAAGATCCAGAAGAATTCAAATCCCGTGCAAAACAAACAACCGATGCTGACGAGCGCAAAAACTGGCAGC  
CCGTTATACATACATGAAACAGGCGATTCCGGTAAAAGCTAATCTCGATAAAGCATATGCGGCTTTAATGGGAGAATAAAATGG  
AAAAGCAGCCGGATAAATTAGAAGTTCTGATGGACTGTTTTTAGGTGACGCGAAGGAAATCACCGCAACTCAGAAAGAAA  
TGACGCAGAACTTTCTGAGCTTTGAAAAGCTGGCAAAGACACCGAAAGTTTAGGAGAGACGGCAGACTCTTTTAAAC  
GGGCTTTAGTAGAAAACAGCGTTCAATTAGCCTGGCAATTAGTGATGATGCTAAGGCGCGGAGGAATTTCTAACTAAATTC  
CGCCGCGCGCAGGCGTCCAGTGCTGAGACGTTTACCCGTCAGATCCTTTTTATTACAGCTGGCTGCACCATCGTGGGCGCCG  
CAGTAGGCGCCGCGATAGCGATACTTTTACTGAGATAAAGCAAACCGGGCGTGTCGCCGTTTTTTTTGTCAAGCGGAGCGCGG  
AGGCCGAAGGCCGGAGGCATTAGTGCCGCGCCCGCGTAAGCGGGGCGAGACGGGAACCGGCTCGAAGCGCAGCACGG  
CAGAACGGCCCCGAGGGCAATGCCGTTTTAATTCATCGTGACAGTCGCGCGTGACCATCACGGGGAGAAAAATAATGA  
ATGACCGACAGCGAGA ACTGGCCCGTATACGCCAGGCCCGCCGCGCGCGGCTCAAGGAAGAAGGCACAAGCGTGACA  
GTCACGCTAACAAAACAGGAAGAAGCAATGTTGCAGGAGCTGTGCCGGTTTCGCCGCTCTGGACGAACGCCTTATTCAACG  
AACGAATTTTTCCAGCTGCTGCTTATCCGCAACTGGCAGCAGTGGCAGGAGCAGAAGGCACAGCTGGGAAAATGCCAGGCT  
TGCGGAAAAGCTGAAAGCGGAGGGGGGGTGCAGGGTGAACGGAAGGCGAAACCTTTAACTGCTGGCTTGCCGTCGAAG  
CCAATGAACTAAATTTGTAGTGTATTGTGCAATACACATTTACACAGAAACAAAACACCGGCAATTCCTGGAACCGGATACC  
TACGGCTATTCTGGGTGAACGTACTTTTTGCACCTGGGTGCGCTGAAAAGCTGAATATGCAGGGTGACGTTGCGGTGCT  
GTTCTGCTTTGTAGACTGAATGCGCCAGCTATACGCCTGACTGCTTAAACCTGGTAAAGTTCTGCAACCGGCACTGACCGGAA  
AGCAAGGCAGGGAAGACCTAAGCCAGAAACCTTGACTGCTCCCCGCCCTTCAGGGCGGGGATTGCGGATCATGTTCTTCTCT  
TTCAGGGATTCAACGCAGACAAGAAAGGCTTTCAATTTCTATACGTGAACGGCCGCGCAGCGGAAAGAAACAAGCCCGGT  
CAATCCGGGCTTGTCTTTAGGCGGCTCAGAAATCGCCTAAAGGCCCGGCTTGCCCGGGCAGTCAGTGCTATTTAGTTTTGT  
GCAGCAGCTGGCTTAATTTGCCGCCAGTGCATACGTCGATTGGAAGCGCCTTGCAGGCGCTGATTAGGCAGCTGGTTGAA  
CGTTTCGAGGCAGGCGCGCAGCAATAATTCTTTCTGAGATTGACTTCTTTTTTCAGTTGGGAAGGGGTGGTAACTGTAGTC  
ATGCTTGCTCCTTAGTGAGCCGATATCGGCAATTTTTCGGGTGGCGGTGTTGCCTCCCGATGATTTAATTATCGGTGATTATGCT  
TTTAAAGTCAATACAGGTACGGAATTTATTTACCTGTTTTTATGCCGTCAGGGCATGGAAGGCGACCGCGCCGGACTCCACC  
GGACACCGGCCGCAAATCGCCGAAACTGCGGGACTGACCGGAGCAACAGGCCAACCCCTCCCTGCTAAGCCATAACCC  
AGCCCGCCGACGCAGCTGCCGCACGTCCCCACGGGGGTGCGCAGTGGGCGCCGCGCGCCTGCGCGCGGGTACGGCG  
GCCCCCTGCGGGTGC GCGCGCCGTACTGCGAGTTAGCGGCCGCGCGCGCCGGTTACGGGGGACACCGCACAGTCAG  
GCCAGTGCCCCGCTGAGCTGCACAATCCACGGATAACACAATAGCGCACTGGCAAAGGATGCCGACGCCTGAAGGGCGTGG  
GCACCCCGAAGGGGCGGGGCGGCCGCTTGC GCGCCGGGCGAGTCCGGCGCAGGGTGTGGCCTGCCAAGCGGAGCGCGGA  
GGCCGAAGGCCGAGGCGTTAGCGGCCGCTGCCCGGTAAGCGGGGCGAGACGGGAACCGGCTCGATGCGCAGCACAGC  
AGAGCGACCCCGAAGGGGTAACGCCCGGTGTGGCATCAGGATTTAGTGCAATGGCAGAACATGAGCTGGAGAGATCACCG  
GCAAGCAGCAGCAAAGGGGCGGCACAGCCGCCCGATGGCTGTTGCCGATACCGGCGATTAATTAGAGCGGTGTTTAAAT  
CCCCCGCTTGC GGGGACTAGGTTTCAGCAAGTCATGTTAAATACGTGTCCATCATGTAACTGAAATCCCCAATAAACAGA  
TCCCGCGCATAGGCTACGATGTCAAATATCGGGCTACGGATTCCGGAATATCATTAGTAGACCGCTATCATTAGGTATTCT  
CTGCAAAAGTTTCTTCGTCCTTAGCTTCGCCATATAGGCATCTCTAAACAGGTCGAAATCAGTGCTATTAACAGATCAACAA  
AGGCCACAAACGCCGCTTCGTTACCTTCTCGCGGGCTTGTTTAAAGCCGTTAATAAAATCCCAGTTGATATGGCACTCTGAC  
GCCATAACAGACGGAATACCTCCCAATCTTGGAACATAAATTCTGGATCAGCCTCATTTGCGTGTA ACTCGCGGCAGCGCTCG  
TAAACTCCTCTGAGCTATCAAATCGGTGAGATCGAGCCAGGCTCCCGCAATGCTTCCGCAGTTGTATTTATGGTAAGTGCCA



ACATAAACAGAAGGGGTCGTAATATCAGTCATGGTGTACTCCTTAAAGCGCCGATACCGGCAATTTTTCGGGCGGCGGTATTG  
CCTCCCGATGATTTAATTATCGTTGATTATGCTTTTAAAGTCAATACAGATACGGAATTTATTTACCTGTTTTTATGCCCGTCAGG  
GCATGGAAGGCGACCGCGCCGACTCCACCGGACACCGGCCGAAATCGCCGAAACTGCGGGACTGACCGGAGCAACA  
GGCCAACCCCTCCCTGCTAAGCCATAACCCAGCCCGCCGACGAGCTGCCGCACGTCCCCACGGGGGTGCGCAGTG  
GGCGCCGCGCCTGCGCGCGGGTACGGCGCCCGCTGCGGGTTCGCGGCCGCTACTGCGAGTTAGCGGCCCGCGCGC  
GCCGGTTACGGGGACACCGCACCGTCACGGCCAGCGCCCGCTGAGCTGCACAATCCACGGATAACACAATAGCGCACTG  
GCAAAGGATGCCGACGCCTGAAGGGCGTTGGCACCCCGAAGGGGCGGGGCGGCCGCTTGCGGCCGGGCGAGTCCGGCGC  
AGGGTGTGGCCTGCCAAGCGGAGCGCGGAGGCCGAAGGCCGAGGCGTTAGCGGCCGCTGCCCGGTAAGCGGGGCGA  
GACGGGAACCGGCTCGATGCGCAGCACAGCAGAGCGGCCCGAAGGGTAACGCCCTGTGTGGCATCAGGATTTAGCACA  
ATGTCAGAACATAAACTGGAGAGATCACCGGCAAGCAGCAGCAAAGGGGCGGCACAGCCGCCCGATGGCTGTTACTTGT  
TTTGTGCGGTAGCACTTTGATTAGGCCGTTACGGCCGTAATCAGAGCGGCCAGCGAGGTGATGATTTGCGGTAGGTTTTCG  
AGGATGGTAGAGGTCATATAGCACCTGTAGAGAAGTTGGCGGGGTGTCGTTTCCGACGGCCGACTGTAACCGGGCGAATA  
AGGCAGGTTGTCAACAGCTTGAGCGAAGCGTCTGTTGACAACCTGCCGCGCCCGTTTTACTGCGGTATAGGCGGAACGA  
CCCACGCCAACGGAACGGCTTTATGACCGGGCAGCTGAGATACCGGCGAACCTGGCTGGCGGCTGACGCCAGCCGCAAG  
CGCCAGCGCGGAGGGCAAAGCCCGGAGGCCAAGCGGAGCGCGGAGGCCGAAGGCCGAGGCCGAGGCGTTAGCGGC  
CGCTGCCCGGTAAGCGGGGCGAGACGGGAACCGGCTCGATGCGCAGCACAGCAGAGCGGCCCGAAGGGGTAACGCC  
GGAGTCTGCCGCTGTTTTATCTCTCGTTCCATCTGAAATCGGCGGTAAGGCCATTAAGGGTCAAGTTTATCAGGGAGGCGTTA  
GCCCCCATGTTGTTAATCATCAGGCAATATCGTCTTTGTAGCAGGCATAACCGAAGCTAAGCTCTGTTTTCATATAGTGGCGG  
GCAAAGTCCCAGGCATCGTGGCCGAAGTCTCATAATCTGCCAGGACGATTTCCGCGGGCTTTGTGCCATTGCTGTACGGAAG  
AAAGCGGCAGAACAGGGCAGGGGTGCGACCAGTCAGTGACGGTGTGAGATCATATCTGCCAGACGCTCCAGGGAGCCG  
TAAACCAGCTCTGTGCGCAGATCCGCCACCATGCGTTGTTTACGCAGTGATGCCAGATAATCAATCTCTTTGGTTATATCAGAAT  
TTAAGCGGGTCTGGTAATCCATGATGTACTCCTTTGCGCGCCGATACCGGCAATTTTGCGGGCGACGGTGTGCTCCCGATG  
ATTTAATTATCGGTGATTATGCCCTCAAAGTCAATATAAGTACGGAATATGCATGCATAATTTTATATCTTGCAAAGCGTTCATAG  
AGTGCCTGAATCGCTTTCTGACAGCCTCAATAAAAAAAGGCGGGGATTCCCGCCTTTTTTCTTACAGCTGCTTACGTGGCTTT  
TTACGCGTCATATAACAACGGTATCGCGCAGTCTACCGCGTACAAAAGCACGCCAGCGCGCCGCAACCGTACAGAAACGCAA  
GCGGCTTATTATCGAAGTAGCTGAAAACCCCTGTGCGCCGACACAGGCCCAGAACAGAGACGCAGGCCGAGGTGATCTGCA  
CCAGATCCCTGTATCCCGCACGAACGATAAACCAGGGCAGGGCAAGCGCAGCGGCGCTAATAATTAATGCGAGAGGGACAA  
AAACGAGATAGTGATACATGTGAACTCCTTGATGGTTGCCGATACCGGCGATTGTTGCGGGCGGCGGTATTGCCACCCGATGAT  
TTAATTAGAGGTTTTGCGCGTCCAGGAGATTGACCTGAGCCGGGGTAACGTGAAACTTTTTCCCTTTATGGATCACGTTATGC  
GGGGCGCTAATTTATCACTGATAAAGCTAACCGGGTAACGTTTTTTACCGCAAATCCGCTCGCTAAACCATGCCACTTTTGCC  
GCTGGCCGATCCACTGGATGAACAATCACACCGGCCATGCTGCAACCCGTTGCGGGTTCGTCCAGCGTAATGCTTACCGGGA  
CTGTATCCCGTAAAAAACTTAACCGGCGGCACACCTGCCTGCGTAGCGGCTGCGACAACCTGCAAGCCCGATAACCGCTATC  
CGATTAATAAGCATTTTATTCCCTTACTCATGCTGATATCACCTTGCCAGCTGTTACCAGTTTACGAAATCACTTTTATGAATTT  
CACGCCCATGCTCAAGCGTTGAATACAGTTGCCGATAAGCCAGTTACCAGCCGTTTTTGTCTCGGTATACCACCATGCTTCTG  
TCAGAGTAAGCAGCGGTTGCTATCCTCGCCCTTCTCATAGATCCAGATTTTAGTGACGTCTTTACCCGTTTCTGTTGCTGCCCTG  
AATGGTAGGGTCAAAGGTATGTTCAATCTCTATATCGAAGTAACGCTGAAGGAAGTTAGTAAAGTGCATGACGACTCCTGTAA  
GCGCCGATACCGGCAATTTTTCGGGTGGCGGTGTCGCTCCCGATGATTTAATTATCGTTGATTATGCTTTTAAAGTCAATACA  
GGTACGGAATTTATTTACCTGTTTTTATGCCCGTCAGGGCATGGAAGGCGACCGCGCCGACTCCACCGGACACCGGCCGCA  
AATCGCCGAAACTGCGGGACTGACCGGAGCAACAGGCCAACCCCTCCCTGCTAAGCCATAACCCAGCCCGCCGCCACG  
CAGCTGCCGCACGTCCCCACGGGGGTGCGCAGTGGGCGCCGCGCGCTGCGCGCGGGTACGGCGGCCCGCTGCGGGT  
GCGGCGCCGTAAGTACTGCGAGTTAGCGGCCCGCGCGGCCGTTACGGGGGACACCGCACCGTCACGGCCAGCGCCCACTG  
AGCTGCACAATCCACGGATAATGCAGGAGACGAATCATGATAGGAGGCTGAAGGGGAAATGAGCGGCAGCAGGGGAAGG  
GGTTGCCAAGCGGAGCGCGGAGGCCGAGGCCGAGGCGTCAAGTGGCAGCTGCCCGCTGAGCGGGGCGAGACGCGTA  
GCGGCTCGATGCGCAGCACAGCAGAACGGCCCGGAGGGGTGACGTCCGGGGGTTTCGTTTTAAAGATTTTCGACCACATC  
AGTAAATCGTAGTGACACCATGAAGCAAAAGTATCGTGCAGACCAGAATCAACAACAGTAACAGCAGACCTTTTTTTCGACG  
TAATAAACCGGCCCAAAGCGCCCGCAAGAAGCACACTCAACACGATTTCCGTTATACTAATCGTATTATAATCTCTACGTT

TCCCTTTTTAGAACTCTGCCACACACAGATAAAACCTTATAACAAGCTACAAAACCCGTTATTCAGACGCGGTAATGCCTAGTT  
TTTTTGCCAGTATTTTCAGATGACAAAGAAACCCTTATCCACTTCCCGGTTACAAGGTGAATGATTGTGGCTTCATGCCCTTTAA  
CAGAGTGGGATTAATACTCACGCTGAATGATATGCGTCTCTCCATCATTTCCCGTCACGGCAATTAGGCCCTCTGTAGAACAGG  
GGTTGATACTACTAATGTTGGTGTGTTTTTCGGTTTTGTTTCAGCATCGCTGATCCTCAAATATCGGTTTTGTGTTACGTCTGCCGC  
TTTTCGCTGGATAAGCGACTTAAAGAAATCCGACGCTTCAGAATATCGCTATCCTGGAAGTCGGGAAATGTCGCTTCTGTCA  
GCTCCTGCGCCGTACCTGCCCATAACGGTTTCATCGCGGATCATCGTTCGCTAACGCCATCAGCCTGTTTTTTGCTGAAGG  
AGTGCCGAAAATAATCGCGTATTGGCCGCGCTATCCTGATGAACAGAAGTATCCCAGCGATGATTACCCTGTTTACGATAGT  
GGTGATAGATTTGCTGGCCGTAGCGCTCCTGATCGGAATTACGGTAATCGAACATTAACAGTTCAAAAGCATTAAACCGATCTG  
GCAATTGCCAGGCGGTAGGGTGTGAAGTGTGCTAACATAGTTTCCCTGAGCGTGACAGTCACGATAAGGCGGGCTTTGC  
CCGCTGGTTATCAGTTAATCAATGGCACGATAAATACGATTCTGGCTTTGTTCTCCAGCGTATTAACGTACTCCCACAACAGG  
TGATACCGGTTAGCCATCGTTTCGTTTCAGTTTCGGCTTTGCCTTCTCATATGCCAGGCCGAAAAGTAAGTGTAGGCATACAGA  
CAAACAATAATCCCTACTTCGCGCGCGCTGCATTACCTTCAAATAGTTAGGTAACGAGAGCCAAAGAGGTTGGGGCGCTTC  
CATAAAAAACGCGCCATTGCTGGCCTGAAGGTATTCCAATACCCTCCCTGGTAGTCTTTAGCGTAACGATTTCAGAAAGGACT  
GAATGAAGTGATCTGCGCTGAAGAAAGCGCCACGAAATGCCGAGGCATGAAGTTCATGCGGGCGTTTTTCAGAAATGTAGC  
GGGCGGTGATTTTCGATAGTTTCCATGATACTTCTCTTAAAGCCGATACCGGCGATGGTTAAGCGGCAGGCACATCACCTGCC  
ACTTTTTAATTATCGTACAATGGGGCGTTAAAGTCAATATAAGTACGATTATATTTACCTAATTTTATGCCCGTCAGAGCATGGA  
AGGCGACCTCGCCGACTCCACCGGACACCGGGGGCAAATCGCCGGAACTGCGGGACTGACCGGAGCGACAGGCCACC  
CCCCCTCCCTGCTAGCCCCGCCACGCGCGGCTTACAGGGGACACTGAGAAAACAGAAAGCCAACAACACTATATATAG  
CGTTCGTTGGCAGCTGAAGCAGCACTACATATAGTAGAGTACCTGTAAAACCTTGCCAACCTGACCATAACAGCGATACTGTATA  
AGTAAACAGTGATTTGGAAGATCGCTATGAAGGTCGATATTTTGAAGCTCCGGCGCCAGCCGGGTACACAGCATCCCTTTT  
TATCTGCAAAGAATTTCTGCGGGGTTCCCCAGCCCCGGCCAGGGCTATGAAAAGCAGGAGTTAAACCTGCATGAGTATTGTG  
TTCGTACCCTTCAGCAACTTACTTCTACGGGTTTCTGGCTCGTCAATGGAAGATGGCCGCATCCATGATGGTGACGTACTGG  
TTGTGGATCGCTCGCTGACGCCAGCCACGGCTCAATCGTAGTCGCTGCATCCATAATGAATTTACCGTGAAGCGGCTACTG  
CTGAGGCCAGACCCTGCCTGATGCCGATGAACAAAGATTTTCTGTGTACTIONTACATTGACCCGGATAATGAGAGCGTTGAAAT  
CTGGGGAGTGGTTACGCATTCCCTTATCGAGCATCCGGTATGTTTTCGCTGATTGATGTCAATGGCATGTACGCCAGCTGTGA  
GCAGGCATTTAGGCCAGATCTGGCAAACCGAGCAGTGGCCGTTTTATCCAACAATGACGGCAACATTGTGGCCCGTAATTACC  
TGCGGAAGAAAGCGGGCCTGAAAATGGGCGATCCGTACTTCAAAGTCAGACCCATAATCGAGCGTCATAACATCGCTATTTTT  
AGCTCTAATTACTCTCTATGCCTCCATGTCGGCCCCGTTTCGCGGCCGTAGTTGAGTCCCTTGCAAGCCACGTGCAACAGTAT  
TCAATCGACGAGCTTTTTGTTGACTGCAAAGGGATAACGGCCGCCATGAGCCTTGACGTTTTCGGGCGCCAACCTGCGCGAG  
GAAGTCAGGCGACACACAACGCTGGTATGCGGGGTCGGTATTGCCCGTACTAAGACGCTGGCGAAGCTGTGTAACCACGCT  
GCAAAAACATGGCCCGCTACTGGCGGGGTGGTTGCTCTGGACGATGGCGCCAGACTGAAGAAATTAATGAGCATCCTGCCG  
GTTGCGGAAGTCTGGGGCGTCGGCCATCGTACAGAGAAAGCACTCGCCACAATGGGGATCAAACGGGTGCTGGATTTAGCC  
AGGGCAGATACGCGCCTAATCCGTAAAACATTCCGGCGTTGTGCTTGAAAGAACGGTACGGGAGTTGCGCGGCGAGGCTTGC  
TTCAGCCTGGAAGAAAACCCTCCTGCGAAGCAGCAGATTGTTGTGTGCGCTCATTCCGGCCAACGCGTAGAAACCCTGACGG  
ACATGCAGCAGGCTGTCACCGGATTTGCAGCGCGCGCAGCTGAAAACTGCGTAATGAGAGGCAATACTGCCGCGTCATAAG  
CGTCTTTATCCGTACCAGTCTTATTTCAGTGCGTGATACACAGTATGCCAATCAGGCAACCGAAAACTGACGGTGGCAACCC  
AGGACAGCCGCACGATAATTCAGGCAGCACAAAGCCGCGCTGGCGCGGATCTGGCGGGAAGATATTGCGTATGCAAAGCAG  
GGGTCATGCTGGCAGATTTTAGCGGGAAGGAGGCCAGCTTGATTTATTCGACTCTGCTACGCTTCAGCTGGCAGCGAGGC  
TTAATGGCTGTTCTTGATGGTATAAACCGGCGTGGAAGAGCCAGCTTTTTTTTTGCAAGGCCAGGGCATCGATAACTCCTTTG  
CCATGCGTCGTCAGATGTTGTCACCTGATTACACGACAGACTGGCGCTCAATACCAATAGCCACCATCAAATAATTACCGGCGC  
CGTACACGGGCCGGTTAACCCCTCAACCGGCCGAAACAAGTTTCGGCACGTTTTTCGCGTTTTTCGGTAAAAGCCGTTTCCTC  
TGTATAAAAGATCAGCTAAATTATGTGATTGCACAATACATATATGTGAGGTTAGCAGTGAATTTGCCTACGCCCGAAACCTAC  
GATGAACTTCAGAGAGCCTACGATTTTTTCAATGATAAGCTATTACGCAACGAGCTGCCGCATGCCTGATAACGTTGCAGCG  
TGAGAAGCGAACGTATGGCTATTGTTCTTTAAGCGTTTTTCGTCGGCCGTGAGAGTGGGTACACGGTAGACGAGATCGCTATG  
AATCCGGTGTATTTCTCGATCAGAACCATAAAGGCCACGCTTTCAACACTGGTGCATGAGATGGTTCATCAGTGGCAATTCAT  
TTTGGCGAGCCTGGCCGCGTGGCTATCAACAACAACAGTGGGCGGCCCGGATGGAACGGGTAGGACTAATGCCTTCTGAT

ACCGGCGAACCGGGAGGCAGGAAAGTGGGCCAGAGCATGACCCATTATATTATTGCCGGTGGCCCTTTTCGATATGGCCTGTG  
ATGAACTGCTGACAGGCCATTTCCGGCTTTCTGGATGGACAGGTTTCCGCCTTACCAGCCTAAGCCTGGCGCTGTGCTAAGC  
CCTACAGGAAAAGGCTATATTGACGACGAGGAAGATGATAGCGAACACGAACAGGAGGTGGAGGAAGGGCGCGACCCGGT  
TGAACCTGACGACGAGATCATAGAGGCCATGCGATTTGTAACCCACCGCCTGAAGCACCGGTGAACAAAACAAACCGGGA  
AAAGTACAGCTGCCCGGTGTGTCATATCAATCTCTGGGGTAAACCGGGGATAGTGGTTTACTGTGGTGGCGAGCACTGTAATA  
AAGCCGCGTTAGTAGTCTTAAAATAAAGTCCTTTCCGACTTTATTTTTTTTCCATTTCCGAGGTCGTGATGTTATTAATGCTGTA  
CTTCGCGGCTTCTTTTAAAACAGTTTCAGCAAGGCTTGCTGGTATCCAGACCTGAACCTAATTTAATGGTTCGCCGTTCTCGGC  
TTTAAAGAGTGGTGTCTGGTACAAATCCAGATTCGCTTAACGGTGTCTGGAAATGTTTTGCTTGAACGGCCTACTCGCATGG  
CTACGTCTGATGATTTCTCACCTTTGACAAGCACGGAATAGCCAATATCTGTTGTGATGTGTGCAAAGGAAGCCATTTGCGGC  
AGCAGCTGTTTCCATTCTGTTTCTGAAATTCTGTTTTCTGAGCCATCTGTGGCGCCTCCGTAGTTTTGGTTACAGAAAGGATA  
TACTCAGAATAAACAGGGGTCAATACAAGTACGATTTTATAAACTTTATTTTATTTGAGGGTGTAGGCCCGGTGCGGCAGCAG  
CGCGGGCCTCGATGGTGCCGCGAAGGTGCTGGCGCCATGCTCGGATTAACATGAACCGTGAAGAACTGCGAAACTTGT  
TTCGCGGTTCTGAGGGGTTGACCGAGCCGCGAAGCGGCGCTGGTAAGCGATGATATGCACATATCCACAGGCATATTTTAA  
AAGGTATTTATAGATTTTTTATCTTTTTAAAGTCTTTTAGAGCTATATAACTCATTGATTTAAATCATAAATAAGTGTATCTCTG  
GGAATCCGCCACCTTGTTATGGGAATTGGCCACCTTACTATGGGAAACAGCCACCTTACTATGGGAATTAGCCACCTTGT  
TATG

>pQEB1\_inv1\_IS5708

GGAATTGGCCACCTTAGACGAAACTGTAAAAAATGTATTTACTTGTGTTGAACTTTGTGGTAGTGTGGAGAGTAATTTTTAAC  
CACAAAGGCAAGGCGCATGGATAAGTTGCTGAACAAAAAGATAAAAGTTAAGCAGTCTAACGAGCTTACCGAAGCTGCTTAC  
TACCTCTCGCTAAAAGCAAAGCGCGTTCTCTGGTTATGTCTTATGCAGACGTATTTACAGCTTCAGTAAGCGAAGATGATGAT  
GAGATGGCTGTACTCGGTGACTCTACTTTCAAAGTAAAGGTGGCTGACTATCAGCAAATTTTTCAGGTAAGCCGTAACCAGGC  
TATCAAGGATGTTAAAGAAGGCGTGTGTTGAGTTAAGCCGTTCTGCGGTAATCTTTTACCCGAAAGAGGGGGCGTTTTGACTGC  
GTCGCGCGCCCCTGGCTAACAGAGGCTGGCAGCCGATCAGCTCGTGGTATCTGGGAAATCGAATTTAACATAAACTCCTGC  
GGTACATTTACGGCCTGACGAACCAGTTCACCACCTACTCGCTCCGCGATTGTGGCAGTCTTCGAAATCCCCGACGATCCGC  
CTTTATGAAAGTCTTGCTCAATTCAAATCTTCAGGCTTATGGGTTACTACTCATGCTTGGTTAAATGACCGTTTTCTTTTGGCGG  
AATCCCAACAGAAGAACTTGGCAGAGTTGAAACGATCTTTCTTGATCCTGCACTCAAGCAGATAAATGAGAAAACACCTTTA  
CTTGCTAAGTATAGTATTGATGATTCAGGAAAATTTCTGTTCTCAATAATTGATAAGCAAATCCCGTCTGACATAAATCAGCAC  
ACATGAGCCTGTCAATTTGACAAATTTTTGTATGAAGATGGGCGAATTTCCACACAGCACCGGCGCCCCGCAAGATGGGCGG  
ATTCCCACACGACAGCGGCGCCCCGGCAAGATGGGCGGATTTCCACACTACAGCGGCGCCCCGGCAAGATGGGCGGATTTCCA  
CACGGCAGCGGCGCCCCGGCAAGGTGGGCGGATTTCCACACGGCAGCGGCGCCCCGGCAAGGTGGGCGGATTCTCACGCGG  
CAGCGGCGCCCCGGCAAGATGGGCGGATTTCCACACGGCAGCGGCGCCCCGGCAAGGTGGGCGGATTCTCACGCGGCAGCG  
GCGCCCCGGCAAGGTGGGCGGATTCCACGCGGCAGCGGCGCCCCGGCAAGGTGGGCGGATTCCACGCGGCAGCGGCGCC  
CGGCAAGGTGGGCGGATTCCACGCGGCAGCGGCGCCCCGGTAAGGTGGGCGGATTTCCACACGGCTGCCGCGCCCCGGCAA  
GGTGGGCGGATTTCCACACGGCAGCGGCGCCCCGGCAAGGTGGGCGGATTCTCACGCGGCAGCGGCGCCCCGGCAAGATGG  
GCGGATTTCCACACGGCAGCGGCGCCCCGGCAAGGTGGGCGGATTCTCACGCGGCAGCGGCGCCCCGGCAAGATGGGCGGA  
TTTCCACACGGCAGCGGCGCCCCGGCAAGGTGGGCGGATTTCCACACGGCAGCCTCGCCCCGGCAAGGTGGGCGGATTTCCA  
CACGGCAGCCTCGCCCCGGCAAGGTGGGCGGATTTCCACGCGGCAGCCTCGCCCCGGCAAGGTGGGCGGATTTCCACACGGC  
ACCGGCGTGCAGCAAGGTGGGCGGATTTCCACACGGCACCGGCGCGCGCAAGGTGGGCGGATTTCCACACGGCACCGG  
CGCCCCGGCAAGGTGGGCGGATTTCCACACGGCAGCCGCGCCCCGGCAAGGTGGGCGGATTTCCACGCGGCAGCCTCGCCCC  
GCAAGGTGGGCGGATTCCACGCGGCAGCCTCGCCCCGGCAAGGTGGGCGGATTCCACACGGCAGCGGCGCCCCGGCAAGG  
TGGGCGGATTTCCACACGGCAGCGGCGGGGCCAGTGGGATTCAGGAGAATAGGTGTTTTACCGAATGCCCTGACGAGG

CGTAAAAAACCGCTTGGCGGCGGCCTCATAAAGCAGAAAACCCGCTCAAGGCGGGTTATCTGCTCTGTAGCCTGTGATGCT  
TCGCGGGCATCCGGCATAACAGCGAGGTGAAATCTTCTTTTGGCATGTTAATTATACGTCTAACGCGGCATATGATCAAACCTG  
TATTAATAAGCCACTGTACCGTTTATAATGCTCTCAGATCAAAGAGGTAAGCCCGTTTAGCCGCCTGTGTGATGAGCCAGTT  
CAGACTCTTCAAATCGAATTTGGTACTAAACAGGACCCGAACCGTGGGCAAGCACACGGCAACGGTATAGCCCTCTTCCGG  
TTTCGCACCCGGAAGCCTGGGCGGCAGCGTGGTGAAATCTTCTTTTGGTTAAGTGAATGGCATAACCGGATGGGCGGATTA  
GAGGAAAGGGGATTGCCTAGTAACCTACGCGCCACAGAGATGGAGGTGCGGGGAATGATTGAGCTGATTATCGCTATTCTGA  
CCTTAATTGCGGCTGTATTGCAGTTGATCAACTGGTTCCCTTAATGGTGCCGAGTCTGTGAAGGTGAAAGCCTGAACGGGC  
AAAACCTGAAAGGTTTATAGCCGTCCTTCGGGGCGGCTTTTTTTTCGGCAAATTAGGGTTTTACCGAATAATGCAGAGTTTTAA  
GGTGAGAATTTGCAGACTTGGCGTTTTACCGAACATAGATACTCCCTAGGCTGATAGGTGCATTAGTTATCACCTACCTGAAC  
ATATTGTAAGATGTCAGTCTCCAGTACTTGTGTACTATCAACTGACAAGACTCTTACACGCAACGCAGGGGGATGGAGTT  
TTATGCTTAGAAAAATAATCAGGGGTAGCGGATTAAGTACTCAGTCAAGAAAAACTGATAGAGTTCGCTGATGATGCTTTTTTT  
GGTCTTTGGTCTTATCCTAATGTTTATAGCGATGAGGGTTACTCTAAAAATAAAATTGGGAAAGAAGTTAGTGACTTATTAGTTA  
TTTTTGATAAAGATATAATAATTTTTTCGATAAAGCTATTACATACAATAAAAAACAAAGATCCTAAGGTTGCATGGCAGAGATG  
GTTAAAAAATCAGTCATACAGTCTTGACACAGTTATTTGGCGCAGAGAAGTTATAAAGATCATCCCGAAAGACTTTTTGT  
TGACAAAGAATGCTCAGTTAACCTCCCATTAATAAGATAATTCTTTAATTTTCATTTGGTGCCGTCCTAATAATATTTTCAG  
ATCCGGCGATCTCGTACTTTGACAAAATAGAAAAAGGCAGCTCTGCTACTTTAGTTAACATATTTCTTTAAACGCCCATCAATG  
TCTAGAAAATCCATTTTGTGTCGGAGACGTTTATCCTGATAAGACTTTTGTCCATATACTTTGATGAGACTGCCCTAAACTACTG  
TTAACCGAGTTAAACACAGCAACTGATTTTATTGGCTACCTAACGAAAAAGAGAGGGTTGTAAGAGAAAGAACATTATTGG  
TCAGCGCTGGGGAAGAAGAGACTCTTGCTGCTTACATTATGGGTGATAAAACCATAATATCAAAGAAATTTATTGAAACGAT  
CAAGGGATGACCATACCGGAAGGTGAATGGAAAAACTATAAAACCCTTTCAATTATCAATATCAGCTCTCAATGAAAAAGGG  
TAGCGTTTTCTGGGATAACCTAATCCACAACCTTCTCGACAAGTATATTGTCAGCTAACGTTGGTTTTTTTTAGTGAAATTGAATTT  
TCTACACATGAATTAGGTGTTAGAGAATTAGCCAAAGAAAGTAGGCAATCTAGATATTACCTTTCAAAGAACTTTAAAGAGAA  
ATAAAAACAACCTCAGCCTCATCTAAGAACGTCAAGAATGGTCAATCAATCGATGAGCCTGGAAAGTTTTACTTATTCTTTTT  
TTTTCTAACGATAGCAAGTTGAGTTACTCTGATTACAGAATCAACGTATATCTTATATAAATGCTTATGCTGAGGTTGCCTTTA  
ATAAATACAGACATATTAATAAATAATTACTATTGCAACAGAGCCGCAAATAACAGAAGGAAGATCTGAAGACCTAATATATA  
GCATATCCCAGAGAAATTTACCAAAGAGCAAATGAAAAAGCCAAAGATTATCAAGAGAATACAAAATACTAAGTGATTTT  
TTACCTACTAAAACGACAAAGAGCGATAACTTTAAATCAGTTATATCAAAGGTGAAAAAATAGGGCGGAATACACCTTGTCC  
ATGTGGCTCCGGTGTTAAATTTAAAAAGTGCCATGGTGCGAATAATTAGCATTATTGTATGTATAACGGTAATGGCGCGGCAGA  
GAAACCGGCGGTTCTGCCCTAGTGTGGCCTGCGGGTTCCCCGCACCCGCTGTATGTAGTATCGGCAGCATCTGAGAAAA  
CCACTACATGTAGTTATCAGCGCCACAACGGCGCGGGGACGAGTGCGGTTTCGGAAAAATTGGGGTTTTACCGAATCCGGCA  
AAAGATTGCTTCTATAACGTCCGCTTCTGGCACACAGCAGCCGTTAAGATGTAAGGCCTTACGCCAACTAAATCTAATGGGA  
CAGATTTAGTTGGTGATGGTCAAGTAATCTGCAAACGGTCACCAAGTAAATGCAAATGGGTAGTCAAGTCCGATGCAATTAC  
GCACCCGGCAAGGTGGGCCGATTCCCACACGACAGCAGCGCCCGCAAGGTGGGCGGATTTCCACACGGCAGCGGCGCCC  
GGCAAGGTGGGCCTATTCCCACACGGCAGCGGCGCCCGGCAAGGAGGGCCGATTCCCACACAGCACCGGCGCGCGGCAA  
GGTGGGCGGATTCCCACACGACAGCAGCGCCCGCAAGGTGGGCGGATTTCCACACAGCACCGGCGCCCGGCAAGGTGG  
GCCGATTCCCACACGGCAGCGGCGCCCGGCAAGGTGGGCGGATTTCCCACACGGCAGCGGCGCCCGGCAAGATGGGCGGAT  
TTCCACACAGCACCGGCGCCCGGCAAGGTGGGCGGATTTCCCACACGGCAGCGGCGCCCGGCAAGGTGGGCGGATTTCCCAC  
ACGGCAGCGGCGCCCGGCAAGATGGGCGGATTTCCCACACGGCAGCGGCGCCCGGCAAGATGGGCGGATTTCCCACACGGCA  
GCGGCGCCCGGCAAGATGGGCGGATTTCCCACACGGCAGCGGCGCCCGGCAAGATGGGCGGATTTCCCACACGGCAGCGGC  
GCCCGGCAAGGTGGGCGGATTTCCCACACGACAGCGGCGCCCGGCAAGGTGGGCGGATTTCCCACACGACAGCGGCGCCCGG  
CAAGATGGGCGGATTTCCATATCGACATGTATGTAGCTTGTGTTATCCGTGGATTGTGCAGCTCAGCGGGTCGCTTGTCTATG  
GCGTAGTGTCCCCGTAACCGGCCGCGTGCGGCCGCTAACCGCGAGTACGGCGCCGCGACCCGAAGGCGGGCCCGCTTCC  
CGCGCGCAGGCGCGGCGCCACTGCGCACCCCGTGGGGGACGTGCGGCAGCTGTGTGGCGGTGAGCGGGATTAGGG  
CTTTGCAGGGAGGGGGCTGGGTGCGGCGATACGTTTTCAGCATTGCGGTTTTCGGCGATTTGCGGCCGGTGCCCGTTAACTC  
CGGCGTGGTCGCTTCCATGCCCTGACGGCATAAGAAAATAAAACCGCCATGCTGCGGTCATTCATGATTTTGTGGTGTAGCG  
ATAAATAGTCATGCGAGAAACGTTGAAGCGCTTAGCAACTGCACCAACTGTCATTTAGGATCAGCAAGTAAGATTCTAATTT

GTTAACATCTTCTTCAGAAAGTGACGGTTTTCTCCCTCCCACACGGCCCCTTGCGCGTGCAGCTGCAAGGCCTGAGCGCGTT  
CTTTCAATATTGCGGTTGCGTTCAAAGCTAGAGAATATCGCCATCAGATGAGTATAGATTTCCCCTATAACTGGCGCATTGTGT  
CTATTCTGTCCTTGATGGCTATGAAAGTTATTCCGCGTTTTCTCAGGTCGTCGAGTAAAGTAATGACTTGACCCAATGAACCAC  
CGAGCCGATCTAGTGCCAACTACTAGGGTATCTCCCTCGCGCAATGCTTTAGGCGAGTTCTCCAGTTCCAGCGCACCTTTTT  
TGTCGCGCTTTGGGCCGCTACGTGAGGTCTGATCCTGATAGATTTGCTCACATCCAGCTTTTGTTAGTTGTC AACCTGGTGCG  
CCACATCCTGAAGATGCGTAGATTTACGGGCACTGTTGCAAATAGTCGGTGGTGATAAACTTATCATCCCCTTTTGCTGATGGA  
GCTGCACATGAACCCATTCAAAGGCCGCAATTTTACGCGTGACATCATTCTGTGGGCCGTACGCTGGTACTGCAAATACGGCA  
TCAGTTACCGTGAGCTGCAGGAGATGCTGGCTGAACGCGGAGTGAATGTCGATCACTCCACGATTTACCGCTGGGTTCCAGCG  
TTATGCGCCTGAAATGGAAAAACGGCTGCGCTGGTACTGGCGTAACCCTTCCGATCTTTGCCCGTGGCACATGGATGAAACCT  
ACGTGAAGGTCAATGGCCGCTGGGCGTATCTGTACCGGGCCGTCGACAGCCGGGGCCGCACTGTCGATTTTTATCTCTCCTCC  
CGTCGTAACAGCAAAGCTGCATACCGTTTTCTGGGTAAAATCCTCAACAACGTGAAGAAGTGGCAGATCCC GCGATTATCA  
ACACGGATAAAGCGCCCGCTATGGTCGCGCGCTTGCTCTGCTCAAACGCGAAGGCCGGTGGCCGTGACGTTGAACACCG  
ACAGATTAAGTACCGGAACAACGTGATTGAATGCGATCATGGCAAACCTGAAACGATAATCGGCGCCACGCTGGGATTTAAA  
TCCATGAAGACGGCTTACGCCACCATCAAAGGTATTGAGGTGATGCGTGCCTACGCAAAGGCCAGGCCTCAGCATTTTATTA  
TGGTGATCCCCTGGGCGAAATGCGCCTGGTAAGCAGAGTTTTTGAATGTAAGGCCCTTTGAATAAGACAAAAGGCTGCCTCA  
TCGCTAACTTTGCAACAGTGCCCTTTTAAAAATATGCCTGTGGATATGTGCATATCATCGCTTACCAGCGCCGCTTCGCGGCTC  
GGTCAACCCCTCAGAACC GCGAAAACAAGTTTCGCGAGTTCTTACGGTTCATGTTTTAATCCGAGCATGGCGCCAGCACCTTC  
GCGGCACCATCGAGGCCGCGCTGCTGCCGACCGGGCCTCACCTCAAATAAAATAAAGTTTATAAAAATCGTACTTGTATT  
GACCCCTGTTTATTCTGAGTATATCCTTTCTGTAACCAAACCTACGGAGGCCACAGATGGCTCAGAAAAACAGAATTTAG  
AAACAGAATGGAAACAGCTGCTGCCGCAAATGGCTTCTTTGCACACATCACAACAGATATTGGCTATTCCGTGCTTGTCAA  
GGTGAGAAATCATCAGACGTAGCCACGCGAGTAGGCCGTTCCAAGCAAACATTTCCAGCACCGTTAAGCGAATCTGGGATT  
TGTACCAGAACACCACTCTTAAAGCCGAGAACGGCGAACCATTAAAATTAGTTCAGGTCTGGATAACCAGCAAGCCTTGCTGA  
AACTGTTTTTAAAGAAGCCGCGAAGTACAGCATTAAATAACATCACGACCTCGGAAATGGAAAAAAATAAAGTCCGAAAGGA  
CTTTATTTTAAAGACTACTAACGCGGCTTTATTACAGTGCTCGCCACCACAGTAAACCACTATCCCCGTTTACCCAGAGATTGA  
TATGACACACCGGGCAGCTGTACTTTTCCCGTTTTGTTTTGTTACCGGTGCTTCAGGCGGTGGGGTTACAAATCGCATGGCC  
TCTATGATCTCGTGTGAGTTCAACCGGGTGC GCGCCCTTCTCCACCTCTGTTCTGTTCTGCTATCATCTTCTCGTCTCAA  
TATAGCCTTTTCTGTAGGGCTTAGCACAGCGCCAGGCTTAGGCTGGTAAGGCCGAAACCTGTCCATCCAGGAAAGCTGGAA  
ATGGCCTGTCAGCAGTTCATCACAGGCCATATCGAAAGGGCCACCGGCAATAATATAATGGGTGATGCTCTGGCCCACTTTCT  
GCCTCCCGTTTCGCCGTATCAGAAGGCATTAGTCTACCCGTTCCATCCGGGCCGCCACTGTTTGTGTGATAGCCACGGC  
GGCCAGGCTCGCCAAAATGGAATTGCCACTGATGAACCATCTCATGCACCAGTGTTGAAAGCGTGGCCTTTATGGTTCTGATC  
GAGAAATACACCGGATTCATAGCGATCTCGTCTACCGTGTACCCACTCTCACGGCCGACGAAACGCTTAAAGGAACAATAGCC  
ATACGTTGCTTCTCACGCTGCAACGTTATCAGGCATGGCGGCAGCTCGTTGCTGAATAGCTTCTCATTGAAAAATCGTAGGC  
TCTCTGAAGTTCATCGTAGGTTTTCGGGCGTAGGCAAATTCAGTCTAACCTCACATATATGTATTGTGCAATACACATAATTTAG  
CTGATCTTTTATACAGAGGAAACGGCTTTTAGGGGTGCTTTGCGGGAGAGGGCGAAATCCTACTATAAGGGCTTCCCCGAAC  
AGTCAACGCCGTTTTTAAATTTCTGTCTGTTTCATCAATGAAAGGCAAGGGATAAGACTGCGCTACTATAAACGGTCATGCTGA  
ATCGCTAGTGATTTCGGACCCTGATGAAAGACGCTCGTGAGATCCTCCTTCTGTTAATCGGATAGTGATATCCAGTAGGATATGCA  
GATACTTCTCACGGGGGTCTAACCTTTACCATCAACAATTTACAGTTCAGTACTACTCAGTTAAATTTTTCATGTTGTTGAATA  
CAGTCTGAAGTCATCGCCGTAATGTAATGATGCCAGCACAACCTCGCATTCTTGGCGGCGATTGCAACGACAGCACGCCAGT  
ATCCCCGCTACCAATCAACGAGCAGACCCAACGGCTAAACGGGTCCGTTCTATTCTGCCCCTACCATTACAGAACGGGCT  
CCCTGGACCAGTAGGGTTCGCAGATAGGCATCACCCGCTTTTGTATCCTGCCAAGCTTTGATTTTCCGCCACTACTGTATTGT  
GATGGCGTTAGCCCCAACAGGCTGCCAGTTGGCGCCGTTCTTAAAATCATGGGCATTGCCAATACTGGCGACCAGCGCAC  
TCGCTGTGGTGGGCCAACACCTTTAGTTCCATTAAGTCTGGCTGCGATGATCTGTTTTGGCCACACGAGATAATACCCTGT  
CATATTCGGCGATTTTCTCTTCAATATTAGTGACATGTGTCAATAGATCATCAATGCACAGCCTAACCTGTACTGGCAGAGTTTC  
CTTCTGGTCAGAAACAACATGACGCAGAGCATCAGTGCTTTGTGGGGCAATAACCCCGAATTCAGATATCAGGCCCCGAAGA  
CGGTTATACGTTGCTGTTCTTTCTGGATAAATCCCTGTCTTGTCCGATGTAAGCATTGCATTGCCTGCTGGCTTTCTGCTTTGA  
CTGGTACAAAGCGCATATGCGGCCGCTGCACTGCCTCACAATAGCTATTGCATCAGCTGCATCATTTTTCCCGTCTTACCCG

CCATGCGATAGGGTGAGACAAATTTGGGAGCCATCAACCGGACATCATGGCCATACTGCCTGAATAATCTTGCCCAATAGTGG  
GCACCCGAGCAGGCTTCCATTCCAATGACACAGGGAGGTAAACCTGCGATGAGTTCAGAAAAGTGCTGCACGCGACACCTTG  
GGTTAACCAGAACAGCTTTACCATTTTGGTCAATGCAGTGAACAGCAAACACATTTTGTAGCAAGATCGATACCGACAGTGGT  
GATGGTCATAACGAATCCCTCTGGGTCAATGTTTATCCTATGATTGCACGAAAAGTTAATCAGGCGCATATCTAGGGGAAGTCCC  
TTCCATTGCTAAGGCTTTGGCCAACGATATTCTCCGGTAAGATTGATGTGTTCCAGGGGATAGGAGAAGTCGCTTGATATCT  
AGTATGACGTCTGTGCGACCTGCTTGATCGCGGCCGCGATAGCTAGATCGCGTTGCTCCTCTTCTCCATCCGCGTTCCAAGCTG  
CGAAAAGGCACCCATAAGCGTACGCCTGGTGCAGCAGGCGACGCGGATCGACGTCCAGCGCACGAGAGAATGCGTCCGCC  
ATCTGTGCAATGCGTCTAGGATCGAGACAAAGGTGCTCTCTGTGACCCGATCGTAGAACATATTGGCGGCGCCAAAGCCCA  
CTTACCGACAGACCGACGGGATCTATCACCAGCCAGCCGCGACTGGAGAACATGATGTTTTTCATGATGCAGATCGCCATGT  
AGCCCACGCAGTTCCGAGGCATTGCTCATCATTTGATCGGCTATAATCGCCGCGTGGACGTAGTCAGTTTGACAACCTGCGTT  
TTGATCATCGCGCGCCCGCTGAAACAAAGCTGCAAAGCGATCCCGGATCGGGAGAAGGGCAGAAGGCAGGGGTTCTCTCAG  
ATGCGGCATACAGCTTCCGCAATTAGTTCCGCTGCAATTCGGTGCCTGGTAGTCGCCGTGCTCGGCAACGATGTGAGAGAGC  
ATTCGCTCCCCGGCATATTGAGCAACATCAGATTGTTCTCACGACCGAGCAACCGGACTGCTCCCCTCCATTGCGCCATACC  
AGATAGTCGGCCCCGCGCAGTTCATCAGCAATGTCTTCTATAGTTTTCAATCCCTTGACGATTGCAGGAGTCCCGTCTGGCAAT  
GAAACTTTCCAAACGAGGCTGGAAAAGGTGTCCGCAATGAGAACAGGTTGCGAAAACGTGCCAATGAGCAGGAAAAACAGG  
CGGCATGAACATCAACCCCAAGTCAGAGGGTCCAATCGCAGATAGAAGGCAAGGCGTTTCGCGTCCGGGGCTTCGATCCCC  
AATACATTGAATAGGACAGCGAAGGCGCGCTCTGCTTCATCTGGCGCTGCCAGTTTCTTTCGGCGTTAGCAATCATGAGTGC  
CAAATCGGCATAGCGATCTGCTGTTCCGAGCCGCCAAGGTGATCAGACCCGTGCATTGAAGAGTTTTAGGGTCCACCATG  
AAGTTCGGCATGCAGGGATCACCATGGCAAACAACCATATCGGTGCGCTCTTGGTCGAGCCGCACCGGTAGCTCTCGTTTGA  
CACGAGCCAAAAGATCGAGCTGCGGCGTACTCTTGTCTCGTCCGGTAAGAAGTCGGGATTGACGGCATTGCGGGACACCA  
CATCAACGGCGCGTCCGAACATTGCGGACAGCCTGCGCTCAAACGGACATTGATCAACCGATAGGCTGTGAACAGCGCCAAG  
TTGCTGCCCCATTGACGGCCACGCTTTGAGCAAATCCGCTCCAGACAGATCAGCCGCGGTACTCCCGGAATTGCCGTTATCA  
CCAAGCATGCACCCTCTGTTCTCCTGCCAGTTGATCACCTCGGGGCAAGCCACACCTCGACCTTTGAGCCAAATGAGGCG  
GTCACGCTCTCCAGCGAGCTCACCGCGGCGGGAAGCAGGTGCGATTTTCGCGAAGGCATGCCCGTACCACGTCGAAAAAC  
AAAATCACAGATTCTCCGCTCTGACAGGCAACCAGTCAGAATGCGATTACCAAAAAAATATTAGTTGATTCAATGGAG  
GTTCTTACGTTTTCTGATGAAGCGCGGAGGTGGCTCAACCTGCGAAAAGAAACGAGTTGCTACGTAAGTCCGAGAACATGC  
TTTCCATGGTCTCTGAGCTCGCCTTGATGCCCCGAGGCATAGACTGTACAAAAAACAGTCATAACAAGCCATGAAAACCGCCA  
CTGCGCCGTTACCACCGCTGCGTTCGGTCAAGGTTCTGGACCAGTTGCGTGAGCGCATACTACTTGCATTACAGCTTACGA  
ACCGAACAGGCTTATGTCCACTGGGTTTCGTGCCTTCATCCGTTTCCACGGTGTGCGTCAACCGGCAACCTTGGGCAGCAGCG  
AAGTCGAGGCATTTCTGTCTGGCTGGCGAACGAGCGCAAGGTTTTCGGTCTCCACGCATCGTCAGGCATTGGCGGCCTTGCT  
GTTCTTCTACGGCAAGGTGCTGTGCACGGATCTGCCCTGGCTTACAGGAGATCGGAAGACCTCGGCCGTGCGGGCGCTTGCC  
GGTGGTGTGACCCCGGATGAAGTGTTGCGCATCCTCGTTTTCTGGAAGGCGAGCATGTTTTGTTGCGCCAGCTTCTGTATG  
GAACGGGCATGCGGATCAGTGAGGGTTTGCAACTGCGGGTCAAGGATCTGGATTTGATCACGGCACGATCATCGTGCGGG  
AGGGCAAGGGCTCCAAGGATCGGGCCTTGATGTTACCCGAGAGCTTGGCACCCAGCCTGCGCGAGCAGCTGTGCGGTGCAC  
GGGCATGGTGGCTGAAGGACCAGGCCGAGGGCCGAGCGGCGTTGCGCTTCCCGACGCCCTTGAGCGGAAGTATCCGCGC  
GCCGGGCAATTCCTGGCCGTGGTTCTGGGTTTTTGGCAGCACACGCATTGACCGATCCACGGAGCGGTGTCGTGCGTGC  
ATCACATGTATGACCAGACCTTTACGCGCGCCTTCAAACGTGCCGTAGAACAAGCAGGCATCACGAAGCCCGCCACACCGCA  
CACCTCCGCCACTCGTTGCGGACGGCCTTGCTCCGACGCGGTTACGACATTGCAACCGTGCAGGATCTGCTCGGCCATTCCG  
ACGTCTCTACGACGATGATTTACACGCATGTGCTGAAAAGTTGGCGGTGCCGGAGTGCCTCACCGCTTATGCGCTGCCGCC  
CCTACTAGTGAGAGGTAGGGCAGCGCAAGTCAATCCTGGCGGATTAATAACCCCTGCGCGAAGGCCATCGGTGCCGCATCG  
AACGGCCGTTGCGGAAAAGTCTCCCTGCGTCCGCTGATGGCCGGCAGCAGCCCGTCTGCTGCTGATGGATCCAACCCCTCC  
GCTGCTATAGTGCAGTCGGCTTCTGACGTTCAAGTGCAGCCGTCTTCTGAAAACGACAAACGATGTCAGCCAATAAGTTGTTGT  
AATAATCGACAAGTGTGTTGCAACTCGCCGTCTGTAAGACTGCATTATCAGTCTGATTACAGGGCGGCTATGGTGTCAATTA  
TACACCATAAACCGATGACGGCTGCACGTAAATCTGTGGATGCTCTTGTATGGCGATTCAACGTTTTGCTGTCCACGCATGGCG  
ACAGCATTGTTTAGCCAGCAATAATCCATTATAAGTTGGGGGGAGGGGCTCCGACAACTGCAAAGCTATCTTTTCTGTATTG  
TTTTGGATGTCGTCGCAAGAATGGTATTCTCGATCAGTTCTCGAGCCAATAATGATGTTTGAAGCAGACGGCCAACACCGT

CTGCTTCGTTTCTGGTTCTTGTCTTCCACTGCCAGCGGTTACTGATTGTTACGCACGTAAGTAGCAAAGTGAATGCGCTCTT  
GAGTCTCATCAACGGTTGCCTCCACAGTCTCGCTGGCACTGGAATCAATGTGAAAATTGTTCTGGATCGGATCAACAGGAATA  
AATCGATCACAGTCGAACTCTTTGGAATTATGGTCATGTGCAGTTTCGTTGCTGATGAAAGAGCTTGAATGTACAACTTCTCC  
CCACCAATGACAGCAATGCGTTGATCGGTATTCTCATAACAGTTGATCACAGCACGAAGATCAGGAACGACAGTAGCGCCTAT  
GACATCTTCTTGTTTAAACGTCGAGGAGATCACGAACGATTCGCGTTCCGGGAGAATTCCTTTCTCCTTGATTGCTCCTCGGC  
GCCATCCTTTTCTAACTGCATGTCACGCATGTCAGTATACGTGTGTTTCCCATAACGCACACGCGGATCTCTTTAGAAATCCGC  
GTAAATCGCGCCATGTCTTCTTTCATTTCCATGGAATCTTGCCGCCTTTCCCGAATCCCAACTTAGAATCCACAGCGACTATTA  
GCTCAAGTTGTGGGTGACTCATAAACTCCAAACCAGTCGATGCTGGTTGTTCCAGATATTGCTTACGGAAGGTGGCCAGAT  
CAATCAGTTTGATATTTGCCTTCCGCTGTTGTTGAGATCGTGCACCTTCTCAATTTGCCGGAAGATCCGGAAGTGGATGCCG  
CGATCACCATGGTGGTCTTCGACGAGACTGATGATTGCACTTACCACCCTCAGCTTCAATCAGCTTCTCCAAGGCCGCGTCA  
CGAAAACCGGTGATCACGATCTTCTACCGGTAAAACGATCCCCGAAGTGACCTGCTGTTTGAACCCGATGATTGATTGAAT  
CTTGTGTAATAGCTCGGCATGTTGAGCCATACCTGCAAGCACTTTTGCGGCAGTTTGTAGCTGAATTTGTGACGCTAACGAT  
CTGCTCTTCGGTGATGGCATTGAAATCATCCAAGGTCTTAATATCCAAGCCTTCACACAGAGCTTTCATCTTGCGGCGCCCAAC  
GCCGCGCCCAAAGTGGGGCATCGACCCCAACCAACCGACAGGGGAACACTACTGGGTATAGGAAGTATAAACCACCTTTTT  
GCTCCTCATCCGAAGTATCTTACCTGAAATTCCTCACTCGTTTACCGCTCAAGCCCAATTTTAACTGCCGGTCCAGCCTAAAC  
CGCTCTAATAAGTTTCGATTTGGCGGTAAAATCTTAGCCTGATAGCTCGAGAGATAAACTGCCCCACCGCCCGTTTAAAA  
GTTGGCAGTGTTGAGCAGTGTTGATTGGGGTTCGTAGTCAAAGAGACGACTCTGTGATGGATCGAACAGGCTGGGAGTC  
AGTGGCGGCGCTCGTTCTGGTGGCAGCTCACGCTGTTGGCGGCATTCGCCTTGGCTGTTTTCTGTTTCAGATGCTTGAGAAT  
CTGCTCAATGACCTTCGGATCTTCGATGCTGGCAATCACTTTGACGTGACCGCCGAGTGTTCGCAGACTTCAATATCAATATT  
GAAGACTCGTTGAGGCGTTGCATCCAGGTCATGGCGCGGTGGCGCTCTGCAGGACTCTGTACGCCAGTTAGTATCGAGA  
CCTTCCGATTTGTCGGGCTTCTTGCCTCGCTTGGCGGGTGTACTTGAACCTCGTGTTTGTGTTTCGGTGCAAAGACGCCGTG  
GAAGCGTGTGAGGTTGACTCGCGGCTTAGGTACCAACGCAGCGAGTTTGGCGATGAAGTCCAGCGGCTCGAAGATCACATG  
GGTGGTGCCATTGCGGTACGGAGTTTTGAGCTCGTAACGCACCTGCCATTGGCGGTTAATGCCAGACGTTTTTCTGAAACC  
GCTGGCCGACTAATGTAGCGACACAAGCGCTCAAGCTTATCCCGCTGATGCGCTTCGGCCATCACACCGGCGTGTAGCGAGA  
AACCAGCATGGTTGGCTACTCGACTGCTTGAAGTGGCTTTATCCTCACGCCCTGGCAAGGTTTGCAGGGTGAAGACTTTGCG  
CCCTTGCTGGGGGCCGACGGCAATGCGATACGTAACCGAAGCACCATGTAATTGAGTCAGCGTATCGTCTTCGCCCTCTTCCA  
GTGTCAACCACGTATTCTCGGCATCACGCTCCAAAATCCCACGCTTTTCCATGCAGCGAGCGATGCGATGGCTGAGGGTGTGA  
GCGAGCGTATTCAGCTCATCGTAAGTGGGTGCCTTGACACGATGGAAGCGTTGCTTGCCATAGTCATCTTCGGCATAGACACC  
ATCGAGAAACAGCATGTGGTAGTGACATTGAGATTTAGCGCGGAGCCAAAGCGTTGGATAAGAGTCACTGAGCCAGTTTG  
TGCAGAGGCTTTGGTGTAAACCGCTTTTTTGTATCAGATGAGTTGAGAGTGTACGATAGACGATACTCAAGACCTGGCCCATCA  
GCTGGGGATGGCGAGCCAGCAAAAAGCGTAGCTGGAAGGAAAGCTGAGCACCCACTGGCGAATGGGCTCCTTGGGGAA  
GACTTCGTCTATCAGCAGCGCCGACTCTCGGCCATCCGGCGGGCACCAGCTAGGGCAAAGCCGCGTCTGTTTACAGCTG  
AAGGCGACCAGACGCTCGTGATGACAATCCTCGCAGCGAACCCGCATGAAACCATACTCCAGACGGCCACATTGGAGGAGG  
TCGTTGAATCTTGTGGATGTAGCGAGGCGAGGTGTTGACCTTGGGCTTCGAGTGAGGCTTTGAAGGCTGGGTAGTGCTGCT  
CAACCAGCTGGTAGAGCAGCGTCTGGTCCGGTGGTGGCGTTGTAACCGTTTGTGTTGAGTGGGCGATTGACTCGCCGTGG  
CGTTCCTTGCCAGCGACATGGGTATCCTCCGCTGATACTGTGGTTATGTACAGTATCAGCGGCTTGCCTCAGACGTCCAGTCT  
GGCCCTAGACATCGCTAAATGCTTAACCCGCAATAGCCCTCACGAGTTGTTATCAGCCACTACCGGTTGAGCGAGAAGGTTTT  
GGGTTCCAGGGTGCTATTGCTCCACCAATACAATACTGAAGCCCAACTGTTATCAGTTGGGGCTTTTTCTGTCTGTTTGGCG  
CGGTTGCGTTTTATCGGTAGTCGTCGAGCTCTGCACCATCCACATAAGAGCTTAACGGTGCATCTTCAACGCCATCACACAA  
AACTTTCTTTTACAGCACAGTCAACTTATTGGATGTTTTATTAACAACCCAAAAGGAGATATTAGCGGGCGGCCGGAAGGT  
GAATGCTAGGCATGATCTAACCTCGGTCTCTGGCGTCGCGACTGCGAAATTCGCGAGGGTTTCCGAGAAGGTGATTGCGC  
TTCGAGATCTCCAGGCGCGTGGGTGCGGACGTAGTCAGCGCCATTGCCGATCGCGTGAAGTTCCGCCGCAAGGCTCGCTG  
GACCCAGATCCTTTACAGGAAGGCCAACGGTGGCGCCCAAGAAGGATTTCCGCGACACCGAGACCAATAGCGGAAGCCCA  
ACGCCGACTTACGCTTTTGAAGGTTTCGACAGCACGTGCAGCGATGTTTCCGGTGCGGGGCTCAAGAAAAATCCCATCCCCGG  
ATCGAGGATGAGCCGGTCCGCGAGCGACCCCGCTCCGTCGCAAGGCGGAAACCCGCGCCTCGAAGAACCGCACAAATCTCGTC  
GAGCGCGTCTTCGGTTCGAAGGTGACCGGTGCGGGTGGCGATGCCATCCCGCTGCGCTGAGTGCATAACCACCAGCCTGCA

GTCCGCCTCAGCAATATCGGGATAGAGCGCAGGGTCAGGAAATCCTTGGATATCGTTCAGGTAGCCCACGCCGCGCTTGAGC  
GCATAGCGCTGGGTTTCCGGTTGGAAGCTGTCGATTGAAACACGGTGCATCTGATCGGACAGGGCGTCTAAGAGCGGCGCA  
ATACGTCTGATCTCATCGGCCGGCGATACAGGCCCTCGCGTCCGGATGGCTGGCGGCCGGTCCGACATCCACGACGTCTGATCC  
GACTCGCAGCATTTTCGATCGCCGCGGTGACAGCGCCGGCGGGGTCTAGCCGCCGGTCTCATCGAAGAAGGAGTCCTCGGT  
GAGATTCAGAATGCCGAACACCGTCACCATGGCGTCGGCCTCCGCAGCGACTTCCACGATGGGGATCGGGCGAGCAAAAAG  
GCAGCAATTATGAGCCCCATACCTACAAAGCCCCACGCATCAAGCTTTTGCCCATGAAGCAACCAGGCAATGGCTGTAATTAT  
GACGACGCCGAGTCCCGACCAGACTGCATAAGCAACACCGACAGGGATGGATTTTCAGAACCAGACGCAGCCGACAGGCC  
GGAAACTAAACCGATGTCTGTAGGGTTACCGCTGGATCTGCGTGAATTCCAGCAGCAGCAAGAGAAAGACTTTTCTACAAACC  
AGCTTACAGCAGGCAAAATTTAACCAGAAAAAAGCCGCTGAATTACTGGGTCTGACTTACCATCAGCTTCGCGCTTTGCTGAA  
AAAACACCAGATTTAACGCACATTTGCAGATGTTATATTGGCGGATTTGACGCATAACCTCATCAGGGTTTACCATGACGCCAT  
TACTGTATAAAAAAACAGGCACAAAATATGGCTCTGGCACTCGTTGGCGAAAAAATTAACAGAAACCGCTTCACCCGGTGAGA  
AAATTGAAAATAGTACATTTTTTAAGTGTGATTTTTTCAGGTGCCGACCTGAGCGGCACTGAATTTATCGGCTGTCAGTTCTATG  
ATCGTGAAAGCCAGAAAGGGTGAATTTTAGTCGTGCGATGCTGAAAGATGCCATTTTTAAAAGCTGTGATTTATCCATGGCG  
GATTTTCGCAATGCCAGTGCCTTGGCATTGAAATTCGCCACTGTCGTGCGCAAGGCGCAGATTTTCGCGGCGCAAGTTTTAT  
GAATATGATCACTACTCGCACCTGGTTTTGTCAGTGCATATATCACTAACACAAATCTAAGCTACGCCAATTTTTCGAAAGTCGTG  
TTGAAAAAGTGTGAGCTGTGGGAAAACCGTTGGATGGGGGCCAGGTAAGTGGCGGACGTTTTCAGTGGTTTTCAGATCTCTCC  
GGCGGCGAGTTTTTCGACTTTTCGACTGGCGAGCAGCAAACTTCACACATTGCGATCTGACCAATTTCGGAGTTGGGTGACTTAG  
ATATTCGGCGCGTTGATTTACAAGGCGTTAAGTTGGACAACCTACCAGGCATCGTTGCTCATGGAACGTCTTGGCATCGCGATT  
ATTGGCTAGTCTTCAGGGAGCGGTGAATATTCGCCCCCTGCACAGCTTTTTTACCCTTCAGGCATCGCTGAAGAGTGGTGTGT  
GGAAATTTTCCACTCTTACCCTCCATGCATAAGTGAATGTGTAGCGGGTGAACCGTTGATTTGTCGCGAAGGTAATG  
TGTAAGTACCGGTGTCTATCGCCTTATTACACCCCAGGCGAATGGTACGCATGTCAATTTTCCCGTTCGGCTTTTTTCGCAAGAA  
AATGCTCGAAATAAGGCACTGTTGCAAATAGTCGGTGGTGATAAACTTATCATCCCCTTTGCTGATGGAGCTGCACATGAACC  
CATTCAAAGGCCGGCATTTCAGCGTGACATCATTCTGTGGGCCGTACGCTGGTACTGCAAATACGGCATCAGTTACCCTGAG  
CTGCAGGAGATGCTGGCTGAACGCGGAGTGAATGTCGATCACTCCACGATTTACCCTGGGTTTCAGCGTTATGCGCCTGAAA  
TGAAAAACGGCTGCGCTGGTACTGGCGTAACCCTTCCGATCTTTGCCGTGGCACATGGATGAAACCTACGTGAAGGTCAA  
TGCCCGCTGGGCGTATCTGTACCGGGCCGTGCACAGCCGGGGCCGACTGTGATTTTTATCTCTCCTCCCGTTCGTAACAGCA  
AAGCTGCATAACCGTTTTCTGGGTAAAATCCTCAACAACGTGAAGAAGTGGCAGATCCCGCGATTTCATCAACACGGATAAAGC  
GCCCGCCTATGGTCGCGCGCTTGTCTGCTCAAACGCGAAGGCCGGTGGCCGTCTGACGTTGAACACCGACAGATTAAGTAC  
CGGAACAACGTGATTGAATGCGATCATGGCAAACCTGAAACGGATAATCGGCGCCACGCTGGGATTTAAATCCATGAAGACGG  
CTTACGCCACCATCAAAGGTATTGAGGTGATGCGTGCCTACGCAAAGGCCAGGCCTCAGCATTTTATTATGGTGTATCCCCTG  
GGCGAAATGCGCCTGGTAAGCAGAGTTTTTGAATGTAAGGCCTTTGAATAAGACAAAAGGCTGCCTCATCGCTAACTTTGC  
AACAGTGCCAGACAAAAGGCTGCCTCATCGCTAACTTTGCAACAGTGCCGATTTACGTGCATAGCCGATTTTTCATTCTTTTCTC  
GCTAATTAGTTATGGGGTTATTGTTATGTTGATACAGTAACGAGTTTTGTTACATGAGGGGAGTCATTTTTTCGGGAGAAGTCAG  
GACTTTTCAAGACTGTACAAAAACCATCGTTTTTGTATACATTAATTTAACCAATAGGTTGCAGATCAAATCGTCTGTAACAGCC  
TTTCTGGCTGTTTGTATATAATCATGAAAAAATGGTGTAGTAGTTTTTCAGGGTAACAGGGGATGCTTATGTCCGTTTTCCACAA  
CTGGCTACTTGAGATCGCATGTGAGAATTACTTCGTCTACATCAAACGCCTTTCCGCCAACGATACCGGCGCAACAGGTGGTC  
ACCAGGTAGGGCTTTATATCCCTTCAGGTATCGTTGAAAAACTCTTTCCGTCTATCAACCATAACCGTGAACCTGAACCCTTCGGT  
TTTTCTACCCGCACATGTGTCATCGCATGATTGCCCTGACAGCGAAGCCCGGGCAATTTATTATAACAGCCGTCAATTTGGTAA  
AACCCGGAATGAAAAAAGGATTACCCGCTGGGGTAGAGGCAGCCCACTTTCAGAACTCTGAAAATACAGGGGCTCTGACGCT  
CCTGGCTTTCAAGCTTGATGAGCAAGGGGGGGACTGTAAGGAAGTAAATATTTGGGTATGCGCCAGCACTGATGAAGAGGA  
CGTCATTGAGACCGCTATTGGTGAAGTTATACCCGGAGCGCTTATATCCGGCCCCGCAGGACAGATTCTAGGCGGACTATCTCT  
ACAGCAAGCGCCAGTAAATCATAAATATATTCTACCTGAAGACTGGCACCTGCGCTTTCCGTGCGGAAGTGAATTTATTCAGTA  
TGCAGCCAGCCATTATGTGAAAAATCCCTTGATCCGGATGAGCAACTTCTTGACCGCCGGCGCGTGGAGTACGACATATTTTC  
TATTGGTTGAGGAACTGCATGTTCTGGATATCATCCGAAAGGATTTGGCTCTGTGGATGAATTTATTGCGCTGGCCAATTCTG  
TCAGCAATCGCCGTAATCCAGAGCCGGGAAGTCTCTGAACTGCACCTGGAGCATCTATTATTGAGCACGGCCTGCGACA  
CTTTCGACGCAGGCCATCACAGAAGGTAATAAAAAACCCGATTTCTTTTTCCCTTCGCGAGGGGCTTACCACGATACTGAGT



TTCCCGTAGAAAATCTGCGCATGCTGGCAGTCAAGACTACCTGTAAGGATCGCTGGCGTCAGATACTGAATGAGGCCGATAAA  
ATTCATCAGGTGCATCTGTTTACTCCAAGAGGGAGTTTCTCTGGCTCAATATCGGGAGATGCGGGAGTCGGGTGTCAGATT  
GGTCGTGCCATCATCGCTGCACAAAAAATACCCGGAGGCGGTGAGAGCTGAGCTAATGACGCTAGGTGCGTTTATTGCTGAG  
CTGACAGGGCTTTACGCAGATATTCCATAGATTATCTCCCGCATAAATACCCGGAGGAGCGATCAGATTCGTTCAACCTTGCA  
CGAATCGGCATTAACCGCTTTCAGGATATAAGGTTCAAGCAGTTTGGCTACGGCTTCAAACACGGGCACCACTACGGAGTTAC  
CGAACTGCCTGTACGACTGAGTGTCTGACACAGGAATGCGAAAAGCCTGCCATCTACTTTTTCAAACCCATAAGGCGCGC  
GCACTCTCGTGGAGTCAGCCTGCGGGGCCGATGCGCCTGATTTTCTTCGTTGCGGAAGTCTGTTTACCTGTGGCCATATCCC  
AGCCACGGTCTATCAGAATTCAGACCCGTCTTTGTGATAGCGAGCAGAAAGCGTACGGGCAATGCTTTCTTTATTTTCAGGA  
TTAACGAGGCCAAAACCGAATCCGTTACCCTTAGCTGCGTGCTTTTTGGCGTAGTTATAGAGATACTCCCAGAGTTTCGGCGT  
CAGTATATATTTGCTGTCAACCACGGGTCCAGCAGTTCGCCAATGACGGACGCTGTTCCGGATAAAAACGACTAATATCGC  
GCAGGGTAAAGCCCTGGTGAATGTTAGATCACGACGGAAACCGACCAAACGATACGTTCTCGGTGCTGAGGTAAAAAGT  
GCTTTCCGTGATAACTTTAGGATCGTTTTGCCCATCTCAGCTGCATCCGCAACTTCATAGCCAGTTCGTGAGGGTATCCAT  
GATGACTTTAAAGTTTTACCCTTGTGCTGCTTTCAGTTTTTAACGTTTTCAAGAACAAAGATGGCAGGTTTTTTTTGCGC  
GTATAATACGCGCCACATCGAAGAAAAGCGTTCCTGAGCCTCACATTCGAAACCATGCGCGCGCCGAGCGAGTTTTTCTTG  
CTTACGCCCCGAAGGCTGAACGGTTGACAGGGGAAACCTGCTAGAAGTACATCATGATCCGGCACATGCTCATTAAATGTAAGC  
ATAGGCATCGTTTTCAGGTAATTCAGGTTTATCACTGAGCGTACTTCCGAATATCGAGATTGAAAGTGTGTTCTGAGCATC  
GTTAAACCAGTTAGCTTTATATGTGCGCACAGCCTCTTTATTCCATTCAGTGGTAAAAACGCACTGGCCACCGATGGTTTTCGAA  
GCCCTTCCGTATACCTCCAATCCCAGCAAACAGGTCAATAAACCGGAAGGCATAGTCAGGGTGTGTCAGGCGCTTCCGGA  
AGCATTTCGTAGAAGTTCCTCTTCGGCTAACGTCAGCGTCTTAGGTGAGCACTTACCATTAATCCAGCGATTAAGAGTCTCG  
CGACTCCACTCATTTTTACCAACTTTTCTAAGCAGTTCAGCCACGTACTTCTGGTCATAGATTTCCAGCACCTGCCCGAGCAGC  
TTTTTATAATTTTCTGTGCGAGTTGTTCTTCCGCTTCTGCTTTCTCAAGCAGATCCTGCGCCAGTAATTCAAATTCAGACATATT  
GCCTCCATTGGGTCTTATGGGTGAAACTGTATCACTCATTGACCCAGATTGAATGTTTTATCTGGATATTTAAACAGGTTTTATT  
GTTAGGTAACGCACGTTGGCCACGCTGGAGCGTCTTCTGGGCCTGCTGTCGGCCTTTGAGGTGCTGGTATGGATGACGGATG  
GCTGGCCGCTGTATGAATCCCGCCTGAAGGGAAAGCTGCACGTTATCAGCAAGCGTTACACTCAGCGCATTGAGCGACATAA  
CCTGAATCTGAGACAACATCTGGCAAGGCTGGGACGGAAGTCACTGTCGTTCTCAAATCGGTGGAGCTGCATGACAAGGT  
CATCGGGCATTATCTGAACATAAAACACTATCAGTAAGTTGGAGTCATTACCGGTTCTCTTTGTCTTTTAGTGATTCTATAAACCT  
CATTACGTCTGAATATAAAAATCTATTATTTGATTTATGTGGCTCATGAGGTTGTGGGATGGTCTTGTTTTTGAATGTGCCAGTTT  
TCTTAATGGCAAAGATTAATTCACCTTCTGTTATTCTAACATTTTCAGCAAATGTTTTGCTTCTATAGTTACTGACTTCATTTAAT  
TAACTCTCATGGTATCGATTTTCTTACCAGCATCTTTAACAATGGTGCTCGTTTCTAGTGTTGCTGCGGTACGCTTCATCATCGT  
CTGCGGGGCGGTTGCGATAGTAAGGAGCTGCCGGGCGTGAGCAAATCTATCAGGCGCTGGCCGCTGATAATCTCCATCCGT  
TCACTGGCAATACTGACAGATTTGAACCTGCGCCGGTTTTCCCGGTATGGCAAACAGACCCGCGACAGTTATGACGTTAAG  
CAACTTCTCGAACTCCTGTACGTGCTGTAAAGCAATATGGCCGCGATAGCGTTTAGCCTGAATAAGATAGCGATATTTTCTATT  
ATTACCTGGCCGTCAATGCCTCCATCGCCGGTATAGCGTTTGTCTGATGGTTCTGAAGCCATGCGCGGCTTTGTTGAATAAA  
TCGAACTTTTGTGAGTTGAAGGATCAGATCACGCATTTCCCGACAACGCAGACCGTTCCGTGGCAAAGCAAAGTTCAA  
ATCACCAACTGGCCACCTACAATAAAGCCCTCATCAACCGTGGCTCCATAACTTTCTGGCTGGATGATGAAGCTATTGAGCC  
TGGTATGAGTCGGCAACGCCTTCATCACGGGGAAGACCTCAGCGCTATTCTGATCTCGCCATCACCACCGTTCTGGTCATTA  
CGCGTGTTCAGGCTGACCCTGCGGGCTGCACAGGGTTTTATTGATTCCATTTTTACTGATGAATGTTCCGTTGCGCTGCCC  
GGATTACACCAGTGTGCAAGCGCGCAAAGTCGGTTAATGTCAGTTTCAAACGTTACCCGGGGTGAATCGCGCATCTG  
GTGATTGATTCCACCGGGCTGAAGGTCTTTGGTGAAGGCGAATGGAAAGTCAAAAAACACGGCAAAGAACGCCGTCGTATA  
TGCGCAAAGTTGCATCTGGCCGTTGACAGCAACACATGAAATCATCTGTGCAGACCTGTGCTGAACAATGTGACGGACT  
CAGAAGCCTTCCCGGTCTTATCCGGCAGACTCACAGAAAAATCAGGGCAGCATCGGCAGACGGCGCTTACGACACCCGGC  
TCTGTACGATGAACTGCGGCGTAAGAAAATCAGCGCGCTTATCCCGCCCCGAAAAGGCGCGGGTTACTGGCCCGGTGAATA  
TGCAGACCGTAACCGTGTGTTGCGAATCAGCGGCTGACCGGGAGTAATGCGCGGTGGAAATGGACAACAGATTATAACCGT  
CGCTCGATAGCGGAAACGGCGATGTACCGGGTAAACAGCTGTTCCGGAGGTTCACTGACACTGCGTGACTACGATGGTCAG  
GTTGCAGAGGCTATGGCCCTGGTACGAGCGCTGAACAAAATGACGAAAGCAGGTATGCCTGAAAGCGTGCATTTGCCTGA  
AAACACAACCCGCTACGGGGGAGACTTACCCGAAATCTGATTTATTCAACAAAGCCGCCATGCGCTTCAAATCCTTCCAGCAA

CAGTTCTTCAAACACAAAAGGATCAATTTTCTCAGGTAGTTAATTTTTTGTGGGAAGCCCGCAACGTCTTTATGCGCTCCA  
GCACCCGCCGCGCACTTTGCTGCTTCCTTTTGTGTCGTCGGTTGCGTACTGAACGCCGAAGAATACAACGGCAAACAGTGC  
GATGGCGCTGCAAGCCCATAGAATAAGTTTTCTGTAGTGGGGAAGGGGAACATGGTGATAGTGTGCTTTCTGTGGGTAAAG  
AAAAGGGCGGTAAACCGCCCTGGTGTAGCGACGGCTGTAAACCTGCCACGAAGCGCTGCCTGACTGATTTTGGCAAATC  
CGCCCGTAAAGTACGGTGCCGGTCGAGTAGCGGGCGCCATTCAGATAGCAATAGCCGCTGGATTGCAGCAGTTGTTGCGCA  
GCTTTTCTTCTGCTTTGATAGCCGGGACTCCGCAGACTGCAAACGAACGGATAATTCGTTAATCTGGCGTTGCTGGTTATTCA  
TCTGGCTCTGCATCGCATTACCTTTATCTTGGCTGACGCAACCAGTTAAGAGAGCTGTACAGGCTAATGCACTTAATATAATTT  
TTTACGTTGGCTCCTTAAATTGAGATTATTCTAGCCCGCTATAAGCGAACTTTCCCGTATTTACTTATGATCTGGCTTATCATC  
GACTGGTTACTTCCACCTTCGCCATTATCCGGGCATTCATTAAGAAAAGCCTTCTGGCATCCCTCGTGTGGTTGGGTAAAAG  
CCGTGCTTGTCTTTTAAACGATATTGAAGAAAGCAGCTTCAGCACTGTTACTCTCGCTTCCGCCGCTATCGCCGGTGAGCTTG  
CCCGCCATGCACATAATAACTTTGCAGGGATCTTCAGCATGGCTGGCAGGAAGATAAAGCAGACTACCAGCTGCTATCAGAG  
GGATTAAGAGTTTCTTATTGTTTTGTCTTAAACAGTTTGTTCAGATATACACCCGCCAGAATGTTGATAACGGTAAGTAATATT  
AATAATAACGCAGAGTTATAAATAGATTTGTAACCTATATCGCCTGCGATATATTCGACAATAAAAACGAAAATCGTTAACATTGC  
GAACAACCTAATTAACCTTCTGTAATTTCTTAAACGATATAAGCAACTGAATAAGAGCCGGATTTGATGATGCTGGCGAGTAA  
CCTGATAGCATGGACTCGGAATTTCTTAAATGGGCGGAATGGAAAATGCCTTTTCTTCTTCTGCTTTTTGCTTTTCCGC  
AAAATCAATAACATCGCCATTTTATACTCTCCGGTTATATCTTTAGATCATCAAGTGATAAACCCTATCAAGCAGCTCTTTGA  
GCCATGTTGGTCGGCGGCCAGTCCCGGACCAGGTATTTTCTGCGTTCCTGGGGTCGCGGTATTTTACTTGTCTATGTTCTCTGG  
GGTTGGCAACGCCCTGCATTTTTCATGGCTTCCAGGCTAATGCCAGCGTCCAATTTTGCAGTTAGCCAGGCCGGGCGCTTCCCT  
ATACCAGTCCACGTATTAAGGGTTATCCGGGTCACGATACATGGGTTACCTTTGGGGCGTTTTTCTGATTTAGGGGAAC  
CAGCATTACCTTCTTCTTCCAGAGTTTTCTTTTCTTCTTCTTACACGATCTCATTAGCCCTTATCATAAACATAAGTCGTC  
GAAATTACAATTACGCGGTGAAACGTAATGAGTAAACATCCAAAACCTTCTGGTTCTCGCTCTGGCCTGCCTTGCTTGTGCTG  
GCCGTGCCAGTGCTGCGCCTGCCTCAGATGAAGTTGCCAGGCTTGCAGAGAGATGTGCGCCTGATGTTTACCCTTAACAAT  
GGCGTACATCGTCGGCCATGAGTCTCAAATGGGCGGTACAGGATCAATATTAACGGTGGTAGTACCAGTTAAAACAGCAAC  
CACGTAAGCTGAGGCCGTCAGCGTTTCGAAAGTTCTGCTGAAGGATAATAAAGTTTTGATATGGGCCTTGACAAATT  
AACTCAAATAATTTAGTGGCCTGGGTCTTTTGGTTGACGATATTTTCAAGCCCTGCATCAACCTGCGGGCGAGCCAGACCAT  
CCTTAAAGCCTGTTATGATAGCGCCCTGAAATCCTATCCAGCCGGGCGAGGTTGCGCTGAGACACGCGCTTTCCTGCTACAACA  
CCGGCTCACTCATAAACGGGATTTCTAACGGGTATGTCACGAAAGTTATCAACGTGGCGGTCAATCAACTGATTTGAAAATC  
CCTACGCTGCTACCTGATGGCCAGACCAGTGAGGACAGCACCCGCGACTGAGCCTCAGCAGGCAAAAAGTACGGCCACGCAG  
TATGACGGTGAACAAGATGTTTTGGTTGGGTGATGGCGATGCCTTACGCCGAAATAATACGGATGCCTTTTTAACCAAACA  
GGAAACAGCGAAGGGGGAGTGAGGTTATGGATGGAACGTTTGTACCTTGTATTGCAATCACAGATCCTGGAGCTATTTGAAA  
CAGGAAAAGTGAAGGAGGTAACGATAAACGGGTTTCAATAAGACGTGGTATCCCGTTTTTTCAGATAGACGATGAACAGTT  
GGGCCAGATCGCATGTTCCATTCCGGGTTAACAAAGAGCATGAACTACGAACCTGGGCTGATTTAAGGCTACTGGCAGAGTTT  
TTGAAAGATAAGTGTGGCCTTGAAGAATGCCGTTAAATCTGCAATCAACAGAAGATAGTGAGTAAGGAGAAAGTATGACCA  
CGTTGTTTAAAGATATGGCCCTGCGGTAGTTATGGGCGTTTTGTCCATTGCCCTGCCGCAATTTGCGCTGGCCGCTGGCACC  
GATACTGGTGAATCAACCGCTACATCAATCCAGACGTGGTTGAGCACATGGATTCCAATTGGTTGTGCTATTGCGATCATGGTT  
AGTTGCTTTATGTGGATGCTTACGTAATCCCAGCCAGCTTTATTCTCGTATCGTAATCTCGCTGATTGGTATTGGTTCTGCATC  
ATTTCTGTTTTCCCTGACGGGCGTAGGAAGCTGAACAACGCGAAAAGGGGGGACTTTTGTCCCCAAAGTGAGGACTACAA  
AGATGTTGTTGACGGGAAAAGACCGCTTTTTCAAAGGTGCGACTCGCTTACCTCGCGCGCTGGGTGTACCACGTAATGTAGC  
TATGATGATATTCATGATTTCTGCCTCGCTTTTTATGATTATTCATATGTGGGCGATCCTGGTGTTCGTCTTTTTGTGGATTCTTC  
AGCTGCATTAACAAAATATGACGACCGCATGTTTGAATTATGGGCCTGTGGTTGAAAACCAAATTCAGTAATTGGTTGATTCT  
TCCGTTTAAAGCAGTGGGGAGGATCGTCTTATTCTCTGTTGACTACAAACGTAAGGGTTTTAAAATAATGAGAGCTGCCACCGC  
TACGAAGCCAAAAAATTGATGCCTACCGTAAGGAGCCATCAGTAAATAAAAAGTATTTGCCCTATTCTTATCACCTCAATGAT  
TACGTGATTTTCATGGAACCGCGATCTGATGGCTTTTTTCAAGCTGGATGGCCGCACACATGACTGCGCATCAGATCGGG  
AACTGGTCACCTGGCATAAAGACCTTAATACGCTGGTCAAGAGCTTCGGAACAGACCATGTAGAGCTGTGGACGCATGAATAT  
CACCATGAGGCTAAAGAGTACCCGGATGGTGAGTATGACCATTTTTTCCCTGCTTATGTTGATCAATATAACCGTAAGCTGCAC  
GGTGATTCCAAGCAGCTGATTAATGACCTTTATCTGACCGTTATTTACAAACAGGTAGGGGATAAAAACAGAAAGTTTCTGGC

GAAATTTGAAAAGCCGACTCGTGACGAAATTCAGCGAATGCAGAATGAGGCGCTTGAAGGTCTGGAAGATATTTCTGAACA  
AATCCTGGAAGCAATGAAGCCGTATGGCATTGAGCAGTTGGGTATCTATTATCGTGACAAACGCGGTGTTGAAATTCCTGCGC  
CTGATAAAAAAGAACGTGAAGAACTTGCTGAAGTCGATGAATCAGACATTTTTGACGAAGCCATTGTTATCGAACGCAACGA  
GCCTGAACCTTCGCAGGCTCACGCTTATTCAAAGCGCTGGAGTTCCCTTATTTCTCGAAATATGGAATGGGCCATCGTGCC  
TGTTTGCCGTGATCGTATCCGTGAGTACATCATGGACAACCGCCCTGTTAGCTACTGTGGGGGGATGTTGTCCAGATCAGAA  
CGGTAGATCACAACCTTCTATACCACCGGCATTGAATTCGTGAATACGAAGAAGATACAGAGCCAGGCCAGCTTAACATGCTT  
AAAGAAGCCGATTTTGAATACCTTCTGACGCAGAGTTTTTCTTGCCTCTCTGAATCTTCAGCTAAAACGTTTTCTGACGCATCAG  
GAAAAATCTTTCAGGAAACGCGCGACCGTGCGCAAAGCCAGCTGGCACAGCTTGGTACCGCGCTCGATATGCTGACGTCC  
AGAGAGTTCGTGATGGGCTACCATCATGGAACCGTGCATGTCTGGGATAATGACCAAACGCGGTACAGCGCAAAGCGCGTC  
GTGTGAAGGTTATGCTAACCGGCTGTGGCGTGGTTGGCGGGACTCTCAGCCTGGCCTCTGAGGCTGCATATTATGCGAGACT  
GCCTGGCAACCAGAAATGGGCGCCGCGCCCGGTTCCGATAAACTCATGGAACCTCCTGCACTTCAGCCCCGTTCCACAATTTTA  
TGCGTGGCAAGCCTGACAATAACCCGTGGGGGCCAGCGCTGACCATGTTCCGCACGATCAGCGGTACGCCACTCTATTTTAA  
TTCCATGTGACCCCGCTTGAAGAACTTCTACGGTAAACGCCCGCTGGGCCATGCGTTAATAACGGGTATGTCGGGGGAAG  
GTAAAACCACGCTGCTTAACTTCTGCTGGCGCAGTCAATGAAGTACAACCCGCGGCTTTTTGTTTATGACCGTGACCGCGGT  
ATGGAGCCGTTCAATCGAAGCGTTGGTGGCTACTATAAAGTTCTGCAACAGGGTATGCCGTCCGGGTTTGCCCCGCTTCAGAT  
TGAACCGACCAAACGCAATATTGCCCTCATTAAAAACCTGTTCCGCATTTGTGTGAAACCACCAATAACGGGCCTATCAGCG  
CAACGATGGCTACCGAACTGGCTGAAGGCGTTGATGCGGTTATGGGGGAAGGCTCACTTATTCCACGCGAGGGCGCGCACCG  
TTACTATCCTGGACGGGTACGTGAATGAAGTTGTGGAAAATGGCGTATCACTGAAAGGGCTGCTGCGCGAATGGACGCGCGA  
AGGCCAGTATGGCTGGCTGTTTGACAATGATAAAGACAGCCTGGATCTCAGCGCAATGATATTTTTGGCTTCGATTTATCCGA  
GTTTATCGCAGCCAAAGAGGAAGTATCCAGCCCCGCCGCTACTCCGCTCATGATGTACCTTCTGTACCGGGTACGTGACTCCAT  
CGACGGCAAACGCCGCGTCATTCAGTGCTTTGACGAGTTCCACGCCTACCTTGACGATCCGGTTATCGAGCGTGAAGTTAAG  
CGTGGTATCAAACTGACCGTAAGAAAGACGCTATCTATGTGTTTGCCACGCAGGAGCCGAACGATGCGCTGTCCAGCCGAT  
TGGCCGCACGATCATGTCGCAGACCGTCACAAAATCTGCCTGCGCGATCCGGAAGCTATCCGAGAGGATTATGCCTTCCTTA  
CTGATGCTGAATACGACGCGCTGATGTGATTACCGAACACTCCAGACAGTTCCTGGTTAAACAAGGGCAACAGTCTGCGATT  
GCTTCTTTCAATCTCTACCCTCGCAACAGCGACGATATTGATGCAGATATTAAGACAATGGACAACGTTCTTAGCGTGTGTCC  
GGTGAACCACAAAACGCCGAAATTGCGCATGAGCTGGTTGAACGGCTCGGTAATGACCCTGAAGTATGGCTCAAAGAATACT  
GGCGCCTGACGGCTTAAACAACGAGGCAAACACCATGAAAAAACTGACGGCAGTATTGCTGACCACCGGCCTGATACT  
GGGAGGCGCGCAAAGCGCTTCCGCAGGCATCATCGTGACCAACCCTACTGAGCTGGCTAAACAGGTGAGCAGCTTCAGCA  
AATGGCGCAGCAGCTGGAGCAGCTTAAAAGCCAGCTGCAAACGCAGAAAAATATGTATGAGTCGATGGCAAAGACAACCAA  
CCTGGGCGATCTGCTGGGGACGCTACCAGCACGCTGGCAAATAATTTGCCGGACAACCTGGAAGGAGATCTACAGCGACGC  
CATGAACTCCAGTTCTTCCGTACGCCTTCAAGTTAACAGCATGATGGGCCAGTTAATGCGGAAGTTGACGACATGACGCCCA  
GCCAAGCAATTACCTACATGAACAAAAAGCTGGCTGAAAAAGGCGCTTATGACCGTGTATGGCAGAAAAAGCCTACAACAA  
CCAGATGCAGGAACTAACCGATATGCAGGAGCTGACGGAGCAGATTAACGACTCCAGACCTGAAATCGATTGCTGACTTA  
CAGGCCCGTATCCAGACGTCACAGGGTGCTATTCAGGGTGAGCAGGCGAAGCTGAATCTGATGAACATGTTGCAGCAGTCAC  
AGGACAAGCTATTACGTGCGCAGAAAGACGTGCCACCCACAATTTTTGTTTTTGAACCGGCGGGGACGTTACCGCGTCACC  
TTCAATTAAGTGAAGTAATTGAAAAAACTACTGCTTGTATCCCTTTCCTCCTAGTGGCCTGCGATGCCTCGCATGACGTGGA  
GTGGTACAAAAACATGAGAAAGAGCGCAAGGCAACAATTCAGGAATGCAAGAAAGACGCGGATGAACTTCAGAAACCTG  
ATTGCAAAAACGCGCGCGAAGCCGATCGTCAGCTGTTTGTGTTTCGGCAAAAAGACGGCGAAATCAATTCACCGAAAATTTA  
GGAGTAAGGAGGCAATATGGCATTACCCTAGTCGCAGACATTTTCGAAAAGTAGACGGGGCGATTACGTCAATGGTGAGC  
GCCAATGTTGCCACCATTTCTCTGATGTAACGCCTCTGATTGCCACCTGTCTGACAATCAAGCTGATGGTTTCAGGGGATGTAC  
TCAGCGTTTAAATCCGGGGGCGGGCGACAGCCTGAGTTCGCTGATTAAGAGTATCTTCCATAGCCCTTATCCTGAGCTTTGC  
AACGGCGGGCGGCTGGTATCAACAGGAACTGGTCAACGTGGCGCTTACCTGCCGATGATTTTGCCGGGATACTGTCTGCC  
CCTAATAAAGTCGGTGAAGTGGCGTACCGGCGATTATTGATAGCGGTATTGAAAAAGGTATCAAGATCGTCAACACCGCATG  
GGAAGCCGACAGCTGTTTTATCGAGCGGCCTGGCCGCGTATGCCATTGGCGGCATTATGATGATTGCTACCGTTGTGCTGG  
GCGGCCTCGGTGCGGGCTTTGTGATCATGGCTAAGATCCTTCTGGCCGTTACGCTTTGTTTTGGCCGATTGCAATCTTCTGCC  
TGCTGTGGGGAGCGACAAAAACATCTTGTCTGCTGGCTGGCGTCCGTCATTAATGACCTTGTGCTGCTCATTCTTGG

CTCGTGTGGTTTCATCATGCAGATGTTGACAACCTCCTGTCTCGATGAACTCTGATGCCGCTTACTCATCAATCACTGGTT  
CTATCTCCGCCTTATTACTGACGGTCATTTCCGTTTTCTGTTCTGTTCCAGATTCCGCAAATTGCCGCCAGCTGGGGTAGCGGTAT  
CAGCGCCGGAGTTGCTGACGCCGCACGCTCTACGGGTTCTTCCATGCAGGCGCTTGGAATATGGGCAGCCACGGCATGTTT  
GGCGGTAATGCGTTCAGAGGCGGTAACAGTGGCGGCCGAGCAATCGGCAGGTGGAGGAAGTGGCAGCAACAGCGGAG  
GAAGCAGTGGTTCTAATTTAAGTGGTAAGGCAAGGGCAGTCGCGGGAAGAAGGCTGCATAAAATTAACAAAGTTCGTT  
GAAATTGCAATTCGACGACTTATTATAATTAGTACGTTCAACAACCGATAATGGATGCCGTAATGCGCAGCTTATTGCTTATGG  
GAGTTCTTCTGATTAGCGCCTGTTCCAGCGGGCATAAACCGCCACCGGAGCCGGACTGGAGCAACACCGTTCCAGTAAACAA  
ACAATCCCGGTTGATACGCAAGGTGGTGAAATGAAAGCTAATAAAAAAACAGGGCTTACACGTGAAGCCATTAAGAGTT  
CAACGAAAGCCGTAAAGGGCTTGAAGTTGATCTGATGGATGAAGTGCTGAAGTCCCGGCGTACCGCCTGGATGGTTGCCAC  
CGTTTCCAGCGGTGGTAACTGTTTTTCACTCTCTTTAGTTGGTTACGTGGTGCATAAGTACAGCCAGCCAATCCCCGCACATCT  
GCTAACGCTCAACGAGGCCACTCACGAAGTACAGCAGGTCAAGCTGACCCGCGACCAGACCTCTTATGGTGACGAAATTGAT  
AAGTTCTGGCTGACACAATATGTCATTCACCGTGAGAGCTATGACTTCTATTAGTTCAGTTCAGGTCGACTATACGGCCGTTGGCTTA  
ATGTCCACGCCGAACGTGGCAGAGTCTTACCAGAGCAAGTTCAAGGGCCGCAACGGTCTTGATAAGGTTCTGGGCGACAGT  
GAAACGACCCGCGTGAAGATTAACCTGTGATCCTCGATAAACCGCACGGCGTAGCAACGATACGCTTTACTACGGTTCCGCG  
CGTGCGCAGCAATCCCGTTGATGATCAGCCGCAGCGCTGGATTGCCATTATGGGGTATGAATATAAATCGCTGGCGATGAATG  
CTGAGCAGCGTTATGTCAACCCGCTGGGTTTCCGCGTGACGAGTTATCGCGTCAACCCTGAAGTTAACTGAGGGCTGCCCCAT  
GAAAAAACTACTTCTTTCAAGCAGTCGTTTTGTCAGTCTGGGAGGCGCGGCCACTAACGTTATGGCGCTTGAGGTTGGCCGC  
AATTCTCCTTATGACTATCGCATTAAAAGCGTTGTTATAACCCTGTTAATGTGGTCAAATTGACGCTATCGCCGGTGTGGCTA  
CCCACATTGTTGTCGCGCCTGACGAAACCTATATCACTCATGCTTTTGGCGATTCTGAAAGCTGGACGTTTGCGCACAAAATG  
AACCATTTTTTGTGAAGCCGAAACAGGCCATGAGTGATACCAACCTGGTGATCGTCACCGATAAGCGCACCTATAACATCGT  
CCTCCATTTTCATCGGTGAAGAAACGAAGAAAATGCAGACGGTACGGTATCAAATCCTTTATTGAAACGCCGTGGGCTGTG  
CGCCAGGCCGTTCTTCAAGTACCTATGAATATCCGTTGAGCAGCAGGAAAAGCCAAAAGCGCGGCTGATAAAAAACGCA  
TTACGCAGAAGCTGAAGCAGACGGCTTTTGGCGGGGCGAAGAACTATCAGTACGTAATGAGCGAACAGCCTGAAATGCGCA  
GCATCCAGCCGTTTACGTTCTGGGATAACTACCGCTTTACCCGGTTTGGAGTTTCCGGCCAATGCGGAGTTACCGCAGGTCTAC  
ATGATTTCCGCCAGTGGCAAAGAAACGCTGCCTAACTCTCATGTTGTGGGTGAGAACCAGCAACATCATCGAGGTGGAAACCG  
TCGCTAAAGAGTGGCGTATTTCGTTCTGGGCGATAAAGTCGTTGGCGTTTCGTAATAATAATTCGCGCCGGGCGCCGGTGCGGTA  
GCAACCGGTACGGCTTCCCGGATGTGCGCAGGGTTCAAATTGGGGAGGATAACTGATGGCCCGTAAAAGTGTGATGTAG  
ATCAGGAACTCGATGAAAACACCGGAGACGGTGAATTCGAAAGCGAGCGTGGCGGATTTAAAGGCAGTAACCGCCGTTCCG  
GCTCCTGGTATGAAAGCCTTTGTCATACTGATGGCGCTGCTTGTGTTTATTTCATCGGGATTACGGTCATGGGTAAAATTCG  
ACCCCGGCTAAAGCTGAAGCTGATAAAGACGGTGGTAAAGCGCAACAGGCCAATACTGCCAACTACAGCTTTAACAGC  
GATCCTGATGTTAATAAACCTGCAACTGCGCAGAATAGCGCCACTGATGCCCGTGTGTGACGGTGGCCGACAGGCAGATG  
CAGATGCGGGCAGCAGCAATACCGCCGCGGTACCTCTAATAAGCGTAAAGAACCTTCGCTGAAGAACTGGCTATGCAGCG  
TCGTCTGGGCGGCGAGCTGGCCAGACTAATCAGGCGGCTACAAGCAATAGTCCCGGAGTGCAGCCCAGGACAACGAAAC  
AAGCGAAGGTAGTTCAGCACTCGTAAAAACCTGACTCCTGCAAGGCTGAAGGCTAGCCGCGCTGGAGTCATGGCTAATCCC  
AGCCTGACTGTTCCGAAAGGCAAATGATCCCCTGTGGTACCGGCACCGAGCTGGATAACCTGTTCCGGGTCAGGTTTCT  
GCCGGGTTTACAGGACGTTTACTCAGCTGATGGACTCGTTAGGCTGATTGATAAAGGCTCATGGGTTGACGGGCAGATTAC  
CGGTGGTATCAAAGACGGCCAGGCGCGCTGTTTGTCTCTGGGAGCGTATCCGCAATGACCAGGACGGGACAATCGTTAAT  
ATTGACAGTGCCGGAACGAACTCACTCGGCAGCGCGGGGATTCCGGGCCAGGTGGATAACCCATATGTGGGAGCGTCTGCGT  
GGTGCATCATGATTTCTGTTTCTCTGACACCTAACGGCGCTGGTTAACAGACGCAGAGTAATAACATTAGTACAACAG  
CACAGAAAACAGCGGTGAGCAGCTGGCGTCTGAAGCACTCCGCTTACATGTCTATCCCCCTACCTCTACGATCAGCAGG  
GTGATGCGGTGAGCATTTTTGTTGCCGCGACCTCGATTTAGCGGCGTTTATACGCTCGCAGACAATAAAAAAGTGGGCG  
CTTAGCGCCCGCTTTTCTTCAAGGAGTAATCATGACTGATGCAGCTTTCTATCAACTTGGCCCACTGCGCGAGTATTTAGAAGAT  
CCTACTGTTTTTGAATTCGATTAACCTGCTTTCAGGAAGTTATCTGTGATACGTTTACGCGGCCGAGGGTTGTGAGAACGC  
GGCAATTACGGCAGATTTTATTAGGAACCTTGCTAAATCGTTGGTGAGCAGCAACAAGCTGACCATGCAGGCCATTAATGACG  
TGATCCTGCCTGGCGGGATCAGGGGCGTTATCTGTCTGCCCCCTGCGGTGATTGACGGTACAACGGCCGTAGCGTTTCGTAA  
GGATTTGGCGGCCGATAAAAATCTGGAGCAGCTGACCCGCGAGGGGATTTTCAAGTACTGCCGGAAGATTACCGGCAGCAA

GCAAAGCCTAACGGATGATGATTTTTTTCCTTAAAGAGCTGCACAGCAGCGAAAAATGGCCCGCATTTCCTGCAAACCGCCGTT  
GAGAAGAAACGCACTATCGTGATCTGCGGTGAAACCGGGTCGGGGAAAACGGTACTCACGCGCGCGCTGTAAAATCGCTA  
CATAAAGACGAGCGTGAATTATTTTAGAGGACGTTACGAAGTCACGGTTCGATCACGTTGTAGAAGCCGTTTATATGATGTAC  
GGCGATGCAGGAAAGATCGGCCGCGTCAGCGCCACTGATGCCCTGCGAGCCTGTATGCGTCTGACACCGGGCCGTATCATCA  
TGA CTGAGCTTAGGGATGATGCTGCGTGGGATTATCTTAAAGCACTTAATACCGGCCATCCAGGCGGTGTATGTCAACGCAC  
GCTAACTCTGCGCGCGATGCCTTTAACCGTATTGGGCTGCTTATCAAGGCGACCCCTATCGGCCGTATGCTCGATATGAGCGAT  
ATTATGCGAATGCTCTACTCCACCATGACGTTGTGGTGCATATGGAAAAGCGGAAAATCAAAGAAATTTATTTTGACCCTGAA  
TATAAAATGCAGTGTGTGAACGGGAGCCTGTAATGAAAACTTAGCAACCTGGCTTCTGGCCGAGCATTACGACAGCCGC  
CCTGCCCGCCTTTGCGGTGGAACCATCCGTTCCAGGTTGGCTACTCGCTGAAGGGGGGGTAAGCGGGAACCCAGAAAATT  
CCGCCATTCCGCATTGTGGAATTTTTGGGGGGTGGTCCGCGGCATGACGACCCGCCAAAGGCTACCGCATCTATCTGAGG  
CGCTGTGGCGCGACGCTGAAACCCCGGGGAATTCCGCTACTCCAGTTCAGGTCCGCAATAGTTCGTCCAGGTCCGGTGGC  
GTACGCCGGAACGCCGATTTTTCCGCAACCGTTTCTGCGTTGTCGGCAAGGTGGTCTCAGAGAGCGCTCAAGAAGCGGTT  
TTTCTCGTATGTTTAGCTACGGTGGCCTAGGAGCCTGCGCGGCAGAAGCCAAATCGGCGGAAGATCGAGGACGATACGGGG  
ATGGCTGCCAGTTACCTTCCTTACCGACCCGACCAATCCTATCTGCTGCCCCCTTCTCTGGGAGAGTGGCTACCTGAAGGGCAT  
CTTGCCACTTTCATCAGCGAGACTGTCGATACGCTGGACTTGAGCGCATTCCACGCCCGGTATGCCGGCGGTGGTCCGGGCA  
ATCAGCCGTTTCATCCGCGATGATGGTCAAAGTGCTGATCTATGGTTACGCGAGCGGCGTCTTCTCTTCGCGCAAACCTAGCC  
AGGAAGCTGTACGAGGATGTCGCGTTGCGTGTGCTGGCCGCTGGAAACTTCCCGGCCACCGCACGCTGAGTACTTCCGT  
GCCCTACACCTGACCGAGCTTGAGAATTTGTTTCGTTTCAGGTGGTGCAACTGGCGCGCGAATGTGGGCTGGTGAAGCTTGGC  
ACGATCGCGGTGACGGCACCAAGGTAAAAGCCAACGCCAGCCGACCAAGGCGATGAGCTATAAGCGCATGAAGCCGGCC  
GAGGACGAATTGCATTGCGAGATCAAGGCGTCTTGATCGCGCAAGGCTACCGACGACCAGGAGCGTAACGAGCCGGA  
GCTGGACATTCCTGCCGAGATTTCTCGCCGCGAGAAGCGCCTGGAGGCGATCCAGGCGGCAAAGGCGCGCCTGGAAGGGG  
TCGGTTCCGGCTGAGGGCGAAATGACACCCTAAGCTTTCGGTTCCCTTGGGCCAAAGATATTCGCCAGTCAGTAGAATGTGCG  
CCCAGCCCAATGGGGATATGTGGGGAAAGAAATTCAGGGGGAACATCCAACCCTTCGTTCCGCCGCTCCGTGACGGCATGACC  
AAGATGGACGGTATTCCAGTAAATGATCACCGCAGTCAATAAATTGAGCCAGCGATTCCGGTAGTGCTGCCCTCTGTCTGTC  
GATCGCGAATTTCCCCTGCCTCCCGATACGGAGCGCATTTTTGGAGCGCATGGTGGGCCTCTCCCTTGTTAAGACCGATCTGA  
GCACGCCGCTGCATGTCCGTATCCAGGATCCACTCAATAATGAAAAGGGTCCGTTCAATACGACCAACTTCACGAAGCGCAAC  
TGCAAGGTTGTTTTGTCGTGGGTAAGAAGCGAGCTTGCGCAGGAGTTGGCTGGGCCTGATTTTGCCAGCGGTCATCGTGC  
GGCACAACGGAATAATCAGGCCAGTTCGCAACGATAAGATCCTCCCGGGCTTTTCCACCTACCAACTTGCGTAACCTCCCTGG  
GGGTCGTATCGGGATTAATAACGTACAACCGCTTCGATGGCAGATCCCTGATTCGAGAACGAGATTGTAGCCGAGCAGGCTA  
CTGGCTCCGAACAAATGGTTCGGTGAATCCTGCTGTATCGGCATACTGTTTCGCGAACATGGCGACCGACCTCGTTCATCAGTAG  
TCCATCGAGAATATACGGTGCCTCGCTCACGGTCCCGGGATCGACTGACAAGCGAATGGCGGCAACTGGTTCGCTTACGTGA  
GTATACGCTTTGAGGCCGGGAACAGAACCATATTTGGCATTGACCATGTTTCATGGCTTCGCCATGCCGCGCTGTGCGGAAAAA  
CTGACCATCGCTCGATGCTGACGTGCCATCCCCAGACGCGTGACATCGGCAGTTTACCCTGCGCGGCCACCACAATTGCCA  
ATGCCTGGTTCATGGCTTCGCTTTCAACATGCCAGCGGGCAAGGCGTGAGAGCTGCCAGTAATCATGCGTGTGTTGTAGCTTCC  
GCCATCTTACGCAGGCCAGATTGAGCCCTTCAGCGAGCAGGACGTTGAGCAGACCGATCCGGTCCGCGACATGGAGCCCCG  
GTTCTCAGATGGGTAAACGCATCTGTGAAACCAAGGCTGCATCAACTTCAAGCAGCATGTCGGTAATCCGAACGGACGGCA  
TTCGGCGATACAGATCCAGTATGAGTGCCTCGGCACCATCCGGCACGTCTGCTGTCAACCTGTCGATCCGCAACGTTCCATCTT  
CTATGCTACCGTGCGGAATAGTGCCGTTACGGGCAGCCCGGGCCAGCCGCTTAAGAGCGATCGTGAGTCGCGCCTTTCTGTC  
TGCCAGCCAATCCTGTGGGTTGGAAGGCACGGCCAGTTTTGCATTTTCTGCGCCGCGATCATCGGCACCGAGTACCTGCTTGA  
GGTACCATAGCGGCGGAATGAGCGAGCCAGACATCTCCGGAACGAAAAGCATCCCGGAGGTGAAAGAGTACCGCCACTT  
CCCAAAGACGGGTATCTCCTTTTTCTGAGCTCGTAAATGACGGTTCATTTGGAGCTGGGCCGAGGAAACGCCTTTCTGG  
CGATGCAACACCTTTCATCTCTCCGATCGACAAAGCTGCTGCTACCAATGGTCCGGCGACCGGCGCGGCTTCGAGCTTCAGAC  
AGCGCAACATGCGGGGCGCATAACGACGAAAGCGATGGTATCCCTGCCGACATATGCAAGAGGCTCATCGGCTAGCGTGT  
GCTGAGTTGAGTCCCTGTCGCTACCAGTTGAGCGAGCCGGTCCCATGCAACCGAACTGGCGACAGCCATCTCCAGCGGGGT  
TCCGTCATGCGGGCCTCAAGCAACGAAGCTCCAGCGCGGTGAAGGTACGGATCGTATCCGTGAGTGTGGCTTTAGAGCC  
GGAAATTGTTTCGTATGCTGGCGCTTCGCTTCCCGCCAGGTTTTTCTACGATCCTGTATGGGTTTCGACTATGGCATCAGC

AATCGCCGCTTCCCACTCCACAACACAGACGGCAAGGATCGCCCAGCGGGCGGTCCGAAGTGATGTCACGCAAACCGTCGGT  
GAAGTAGCGTTCACCCTGCCGACGCAGCCGGGCAATGCGATGGGCAGGTATGCTGGCCAAAGCACTATGATTGATATTCAGG  
GTACGCAGAAATTCGAGCCTGTGAGCAAACGGTTAGCAGCAGCCGAGTTGTTACCAACCTCGAAGTTGCGAAGCCAGATG  
AAACGACTGATATTGCCGGCGAGCATTTCACTCAGAAGTTTGTCCAGGTGATCGCGAACATCCGCTGTTAAATTTCCACAATC  
CGCGTTTCAATCCGCCGCTCAGCGGGCAGCAGCATCCGCGCACAAGCGCTCGATTGTCGATACTGCGGGCAGAATGGTG  
GAAGTTTCCCGACACCGCACAATAAAACGATGAGCAAGATCCTCGTTTGATCTGGCATCTTCGGCCTGGCCGAAAGTCCACTC  
CCGCAGATCACGGGCACCACGGCCCGTGAAGGTCTTGAGCCGTAAATTTGCGCGCAGCGTGTCCATGTGCTGCTGACGGGTT  
TGCGCCGTGTGGCATAAGTGAGAAGCGCATCAGCCGGAACCTCAAGCTGAGCACCGACGAAGGAAAGGACTTCACGCGG  
GATCATCTCACCAGGAGCCAGTGCACGGCCCGGATATCGTAAGGCACAAAGTTGCAGGGCAAAGCCAATCCTGTTTTCCGGT  
CTGCGGCGCTGCCTAATGTTTTCCAGGTCATCATCGCCAGCGTGTAGAACTTCAGTAGCGACAGTTCGTCCGTGGGCAGATC  
GAACAGCGCTGCTCGCTGCCGTTCCGGTGAAAATATGGCGTCGTGACATACAAATTCGTCCCTTTGAAGTATAGTCTGTTTTG  
GACAACAGCCAGCCATATAAATCAGGGCGTTCCGATACAAAATCCAGGAGGGTTCAATTGGGACATCGTGCCGCCATTTAC  
TGCCGGTTTTCAACAGCGGATCAGTCTTGTAACGCCAGGAATTTGATCTGCGAGCCTTCGCGGGCCGTGCCGGCTACGACG  
TGGTGGGAATATTTAAGGAAACAGGTTCCAGGAACTAACTCGACCGGGCCGAGCGAAAGAAAGTCTGGCGCTTGCCCACT  
CCAGACAAATTGATGCAATCCTGGTCACTGAGCTTTCCCGTGGGGGCGCTCGACGCTCGATCTGCTCAATACGCTACGTGAA  
CTGGAGAAGTGAAGGTTTTCCGTGATAGCCATGAATGGAATGGCGTTCGATCTTCGTCGCCGTATGGACGAATGCTGGCGA  
CGTTTTCTTTCCGGCATTGCGGAGTTTGAGCGGGATCTCATCAGCGAGCGGGTCAAGTCAGGCCTTGCTGTTGCGAAGGCAC  
GTGGTAAGAGGCTTGGTCGTAGGCGGAGTGCAGCCAAAATCAGACCGACTTTTGCCTAAGGTGGTTGCGATGAGGGCCG  
AGGGACGCAGCTATCGCTGGATCGCACGCGAGCTCGGTATCAGCAAGAATACCGTCCGTGACATCGTGAACGACACAGAG  
CTAACGCTTAGGGTGTCAATTCGCCCTCAGCCGGAACCGACCCCTGGAAGCGCGCCAGCGTGAAGCGGACCAGGCCCGGG  
GGCGCAGCGAAGACGATGGCCGCCGCGCTCGCCATCCGGATGGCTCGGACAAGGGCGGTGGCTCGTACAAACGCGAGTTT  
GGTGTGCCGATGACCGTGATCAGGAAAGCTTACCAGTCCGGACAGCCGATCATGAAACACGCCGGTGGTGGCTCCGAG  
CAGAGCTACAACGGGTACACAGCGGTGATGCCGAGCACCAGATCATCGTGGCGGCGGAGTTGACCAACTGCGCCGCGGAC  
AGTCAGGCGCTGCTGGGCATGCTGGCAGCAGTTCAGGCCAACACCGGAGAAATGCCGGCCAGACGCTGGCGGATGCGGG  
ATTCCGTAGTGAGGCTGTTCTGGCAAAGGTGCGCGATCACCACGGCGATGTCATCGTTGCCCTCGGCCGCGAGGGACGTGAA  
GATGCCAAGGTCAATGCCAAGACCCATCCGCATACGGCGGCGATTGCGGCGAAATTGAAAACGGAGCAAGGCGATGCAGCT  
TACCGCCGGCGCAAGTCGATCGTGGAGGCTCCGAATGGTTGGATCAAGGCGGTGATGGGATTGCGTCAGTTCAGCATGAGG  
GGCCTGGACAAGGTGCAAGCCGAGTGGAAAGCTCGTCTGCATGGCGCTAAATCTGAGGCGAATGGCGTATCTGTGAGGGCGA  
AGGTTAAATGGGGCGGCTCAAATGCACCCAGTCGTCATAACACGCCGCGCGCCGAAGATTGGTATCCTTGGCGCCGACGC  
CTTGCCAATTGCAGAGAGCGCCGCCGATCGTCAAGTGTCTACAGAAAACCGGTACACGGCTCTGCCGCGCAGACTCCTA  
GCCTAAATGTGACAGTGGTTGGTAATCCATGCCGCCCGCAAGGGCGGCGGTGGTGGGCCAATAGATGATTTTCAGAGCCTTA  
CTGCCGTTGACGCCAATCCCTCGAGCGCGAGTCTAGCCGACGCGGCGATGACGGCCTCGCTGTGCTTGTATCCTTGTAG  
GCGCCCGGGTGTAGACGGCCAACACAATAGGTGCGCGCCAGTGGGCCAGACGACGGCATAAGTCAATTTGCCGTGCCATACA  
CTCCGCAGGTTCCGGTTTTGTCTCCGACTGCCAGTCTGCCGGCACCGCCGCGCGGATGCGGTGGTTGCCGGTCTGTTTTCC  
CTTAGCCAATCAACAAACTGCTGCCGCTGCGGCGCAGCCAGTGCAGAGCCAGTGTGAGTTTTTGTAAAGCTTTCCGTACG  
GCGCGCGGCGATGAGGTATCGCGCGCATCGCCTGGGATGGCGGAGTTCAGCTCCAGCTCCAGCGGTCCAGACGGAACGTG  
GTATCGCCGATAGAGCGCATGAAGGCCGTCAGCCCGCCGGGCGCCCAACTCCTTCAGCAACAAATTGGCGGCGGCGTTAT  
CACTGTATTGCACGGCGGCCGCGGACAGCTCCGCCACCGTCATGCCTGTTGTCAGATATTTTTCCGAGATGGGTGACCACGG  
AACCAGCGCATTTTTGCCGTAACGGATGGGTGTGTCCAGCAAGCCGGCCTGCTGCTGGCTGCGAGCCAGCACAGCGGCAGC  
AAGAAAGCCCTGAATGAGCTGCACAGTGGGAAGCGCTCCTCAGCGCGTAACCTACAGTTGCGCCTGAGCCGGTATCCATC  
GCGTACACACCGATGGAGCCGCCAAAGTCTGTTTCGAGTTTAGCGAATGGTTCCGCGACGAGGTTGGTCAGCGCGGTGGCA  
GAAAAGCCAGCCAGCGGCCATGAGAGACAAGACAGCAGAAGTACAGCGGCGATACAGTACATCAACGATATTCCTTGTGTTG  
AAGGTGGAGTTACGGACGGCCTCAGGAAGTCTGGCCAAGCCCCGACTATTGGGGCGCGAAGATAGCACCGAGGGTACGC  
CGGTGTCAACACGGGGTCTGACGCTCAGTGAACGAAAACCTCACGTTAAGGGATTTGGTTCATGAGATTATCAAAAAGGATC  
TTCACCTAGATCCTTTAAATTAATAAATGAAGTTTTAAATCAATCTAAAGTATATATGAGTAACTTGGTCTGACAGTTACCAATG  
CTAATCAGTGAGGCACCTATCTCAGCGATCTGTCTATTTGTTTCATCCATAGTTGCCTGACTCCCCGTGCTGTAGATAACTACG

ATACGGGAGGGCTTACCATCTGGCCCCAGTGCTGCAATGATACCGCGAGACCCACGCTCACCGGCTCCAGATTTATCAGCAAT  
AAACCAGCCAGCCGGAAGGGCCGAGCGCAGAAGTGGTCCTGCAACTTTATCCGCCTCCATCCAGTCTATTAATTGTTGCCGG  
GAAGCTAGAGTAAGTAGTTCGCCAGTTAATAGTTTGCGCAACGTTGTTGCCATTGCTGCAGGCATCGTGGTGTACGCTCGTC  
GTTTGGTATGGCTTCATTAGCTCCGTTCCCAACGATCAAGGCGAGTTACATGATCCCCATGTTGTGCAAAAAAGCGGTTA  
GCTCCTTCGGTCTCCGATCGTTGTCAGAAGTAAGTTGGCAGCAGTGTATCACTCATGGTTATGGCAGCACTGCATAATTCTC  
TACTGTCATGCCATCCGTAAGATGCTTTTCTGTGACTGGTGAGTACTCAACCAAGTCATTCTGAGAATAGTGTATGCGGCGAC  
CGAGTTGCTCTTGCCCGCGTCAACACGGGATAATACCGCACCATAGCAGAACTTTAAAAGTGCTCATCATTGGAAAACGT  
TCTTCGGGGCGAAAACCTCAAGGATCTTACCGCTGTTGAGATCCAGTTCGATGTAACCCACTCGTGCACCCAACTGATCTTC  
AGCATCTTTTACTTTACCCAGCGTTTCTGGGTGAGCAAAAACAGGAAGGCAAAATGCCGCAAAAAGGGAATAAGGGCGAC  
ACGAAAATGTTGAATACTCATACTCTTCTTTTCAATATTATTGAAGCATTACCAGGGTTATTGTCTCATGAGCGGATACATAT  
TTGAATGTATTTAGAAAAATAAACAATAGGGGTTCCGCGCACATTTCCCGAAAAGTGCCACCTGACGTCTAAGAAACCAT  
ATTATCATGACATTAACCTATAAAAATAGGCGTATCACGAGGCCCTTTCGTCTTCAAGAATTTTATAAACCGTGGAGCGGGCAA  
TACTGAGCTGATGAGCAATTTCCGTTGCACCAAGTGCCTTCTGATGAAGCGTCAGCACGACGTTCTGTCCACGGTACGCTG  
CGGCCAAATTTGATTCCTTTAGCTTTGCTTCTGTGCGCCCTCATTCTGTGCGTTCTAGGATCCTCCGGCGTTCAGCCTGTGCC  
ACAGCCGACAGGATGGTGACCACCATTTGCCCATATCACCGTCCGTACGGCACTGTTGCAAAGTTAGCGATGAGGCAGCCT  
TTTGTCTTATTCAAAGGCCTTACATTTCAAAAACCTCTGCTTACCAGGCGCATTTCCGCCAGGGGATCACCATAATAAATGCTG  
AGGCCTGGCCTTTGCGTAGTGCACGCATCACCTCAATACCTTTGATGGTGGCGTAAGCCGTCTTCATGGATTTAAATCCCAGCG  
TGGCGCCGATTATCCGTTTCAGTTTGCATGATCGCATTCAATCACGTTGTTCCGGTACTTAATCTGTGCGGTGTTCAACGTCAGA  
CGGGCACCGCCTTCGCGTTTGGAGCAGAGCAAGCGCGCGACCATAGGCGGGCGCTTTATCCGTGTTGATGAATCGCGGGAT  
CTGCCACTTCTTACGTTGTTGAGGATTTTACCAGAAACCGGTATGCAGCTTTGCTGTTACGACGGGAGGAGAGATAAAAAT  
CGACAGTGCGGCCCGGCTGTGACGGCCCGGTACAGATACGCCAGCGGCCATTGACCTTCACGTAGGTTTCATCCATGTG  
CCACGGGCAAAGATCGGAAGGGTTACGCCAGTACCAGCGCAGCCGTTTTTCCATTTAGGCGCATAACGCTGAACCCAGCG  
GTAAATCGTGGAGTGATCGACATTCCTCCGCTTCAGCCAGCATCTCCTGCAGCTCACGGTAACTGATGCCGTATTTGAGTA  
CCAGCGTACGGCCACAGAATGATGTCAGCTGAAAATGCCGGCCTTTGAATGGGTTTCATGTGCAGCTCCATCAGCAAAAGG  
GGATGATAAGTTTATCACCCGACTATTTGCAACAGTGCCGGTCCGGGAGTACAGCAGATCGACGTCAACGCCGAGCAGC  
GATTTAGTTCTTCTTCAAATCGCCCAAGTCCAACAACGTGGCACCGGGCAGCGCATCGACCAACAGGTGAGGTCGCTGC  
CATCCCGGTCCGGTCCATGCAGCACCGAGCCGAAGACGCGCGGGTTCGCGGCGCGAAAGCGGCCTACCGCTTACGCACTG  
CGCTTCGCTTCATGTCAAGCACAACAGACGGTGCATGCGCATCCTTTCTTATCGAAACTCGTTGAGATGATATGCAATCAAGA  
ATAGAATTTCAAGAACTCACAAAGTAACGCGGTGGTTAATATCCTGTACCCACGGATTGCCCTTAGCGCTGCCTATATCGGCTA  
AAGCACTCCGGTAGCTTGATTCACCCACGGCCACGGCAGGATCTTGCCGTCGCAAGCGCCAGGGGAAAATCTTCAGCTG  
CAAGCCTGAGTGATTTTCATGTGCGTGAATCCATCGCCAGATGATTTTTGTGAAGAAGAAGTCCGCGCTCGTTTCATGTCCGGG  
CGCGCGTCCGCCCCCTCCGTGCCAACGGCCAGCAAGTAATCGGCCTGAATTGGCAGTATCAGCGCGCGTAGTAAGTCATGGA  
TCGCCGGTTGCGGCAGTCTGCGCGCCAGATTAATTACCCGGTCCGAACCTCAGTTTATCCTGCTTGCCTTGTGCGTCTGCTCCA  
TCAGATTTTCATGGCCCCCTTCTTCATGCTCATGCTCATGGGTGTGTTCTTTCCGGTATGGCTCTGTTCCGCCTGAGACGTCTGC  
GGCATGGCGTAATCGTCGTAAATGCTGCTGTCAAAGTCGTAGTCTGATGCTTCGGCATAATGCTCGTAATCGGCATACTCCTGC  
GCGCTCCACTGCTGATCGTCCGCGAGCAGCATAATCATGGGCCAGCTCTGCATCATTTTTGCTGTGCTTCATGACGCCGAGGCC  
AACGGAATCATCCATAGGGTTCTGCTTAAGATGAAAGGCGTCCTCTGCGTTGCTCACCGGCTGATAATCAGTGCCGGTTGTCA  
TGTTATGTTTCATCGGGTTTCTGGTTAAACGCCATGCTTTCCCCCGTGGCTTCTGGCAGACCTTTTTTTCAGCTGATCGGGTTTCTA  
AACTGGTATCGCGCCAATATCCTTAAACCTGGCCTCAAGCCCAAAGAAACGGTCAATTTCTGCGGCCGTGGTTTTTTCGGGCTG  
TCGCGGCTCACGCTCGATGCCAAAGATTTTTTATCGTCCGTAATAATTTCCACCTCATGACGCGCACGCGAAATACCAACATAA  
AAAACGTCCTTAGAAGTGGTAAGCGATTTGGTATCTATGTTGAACAACACGCGATCACAGGTAAGCCCTTGGGATTTGTGGAC  
GGTGGTTGCATAAGCATAGGAAAGATAAGAAGCCTGTTTTTGTCCAGCTCAACCGTGCGCCCTTTTTTGTCCCTCAAGCGTCA  
GTTTTTACCCTCCACGTTTTTACCCTGAAGCGGTGCGGTTGGCAACGTCCAGCGTTTTTATCGTTACGCGTTACCATAACCT  
TATCGCCCCGCGCCAGTTCCGCGCTGACTGCCTGGTATACAGACAGCTTGGTGTGTGTACGCGGGCTGAAAGCGATCTGCTC  
ACCGCTGCTGCTTTCAACCGTCAATTTGTTGCCCGGCCGGTATCAAGAACCTGGTAAGACTCGCCCCGCTTCATACCATTTTT  
GTAATCCTGTTCCGGGATAATGATTTGCCCTTACTGAAATAACGGCTGTGCGGGCGTTCGCGCTGTGTGAATCCACGCGGTC

AAGTAGCGTGAACGTTTCGCCGGTTCGGGCAAGCCCCAGATTGCCCGGATGTAGTCATTGAGGGTTTTGCGTGAGGCGTTC  
GTACCAGAGATTATCAGGGTGGCATCCTGTTGTTCTGAGGACAGAGACAGGTAGCGATCGGCAAGTTGAGCGAGTCGGGGC  
GCTTCTTCCTCAGTTCGTTACGCCGGTGATATTTTCAGGGCGCGCGCGCATTACCTTCAGCGGCATACTTAACCGCCTCA  
AGCAAACTTCATTCTTCTGTCTGCTGAATGTCTTTCATGTAGCTGGTCTGCATATCTGCTTTAATCAGCTGCTCAAAGGCTTAC  
CGGCTTCTACCGCTTTCGTCTGTGACGTATCCCCAGGAATACCGCGCGAGCGTTATGCTTCTCGATCACTCCATCAGCTGTT  
TCATCTGTCTGGGCGGGTATAACCCCGCTTCATCAATGAATACGACTGATTTTTTCATCCAGCTTTTTATCCTTCGCTTTGAGGAA  
AGCGGCAACGGTGCGGGCCGGTAATCCATCATCTTCAAGCGCTTTTTTCTGTGTCCCATAGGGGGCCAGCGCCGTGACCTTC  
AGCCCTTGACTCCAGCAGCTCTTAGCGGCCATCGTCATATAGCTTTTACCGGTACCGGCGTAACCATGTGCGGCCACAAA  
CCGATCTTTGCTCGTCACAATTTCTGTAACCGCGCGCATCTGCTCCTTCTGAGGGTTTTCCCGGCAAGCAGCTGGCCTGCAAT  
CTCTGCGGTCAGCTGTGCGGCATCTGCCCCGGCCGCGTGATTCGATAGTCAGAATGGAACGCTCAAGGCGAATACCCTCC  
ACGGTAGTGACGCGGTGGCTGGTCTTTTAAAGCCTGCCGTTTTTAATACCATCATCTACCGCAAACGGGCTTTATCCGCACGC  
ATCCCGCTATTCGTACGCGAGTCGATCCACTCTTTCGCGTCAGAGTTTCGGCCATAACTGAAGCACCGACCTTCAGAGTTGA  
TTGATACCGGGCTTCGCCCTCGATGATGGCGCCCTTCTGTACCGCCTTCAGGTACGCTTTTTCAACATCGGCTATTGTGGCATG  
GCCCAGCACCTGCTTATTAGCGATTTGAATCAGCTTCTGGCGTTCAAAGCTGGCATCGCGCTCTGACAGCGACTTAACTGCAA  
ACTGGATAGCCCGGTCAGCTTAACTCCGGGCTGGTAAAATCCGGGGCCATGTTGCGCGCTATATCAGCCTCCAGAGGTTTA  
CCGTGTCCCTGCCATTCACGGTTATCAAATCAATGCCGAGCGTTTTGGCGCGGCTGGCCCATTCTGGTGAATTTCTTCACG  
GGAATGCTCTGTTTTCTTTACGCGTAGCCATCGAGACGCGGCTTTTCGTCTGAGCATCGGCGGTTTTCCCGCGTCAGACCCA  
TTGCAGCGAGTCCCTTTCAATTTGCTCCGACCGCGGGAAAAAGCGCGAATCTGTTTCATCTGAAAAATGGGCCATATCGAAC  
GTGTTATTTTTGCTGTTGTAACGCAGCTCATAACCGCTTTGGTCAACTCCAACGCCAGCTCCTGTTGTAAACATCGCCAGG  
TGCATTTTGTACGCATCAGCTCATTTTTGAGCGCGCGCCACTGGCCGTCTCGCGCTGGGTCATGTTTCATGACAAAAGC  
GTGTGTGTGCAAATCAGGATCTAGCGCCCTGGAAGTTTCGTGGCGGAAAGTAGCGACGACAAGGTTATTGGTATTCTGGGTT  
ACTGATTTCCCTGGCGAGTCGTCCGGGCTGCGCGAGTTTTTCAGCTTACGCACAGCAGCGGCAACAGCTTTTTTCATGAG  
CCTCGATAATGGTTTTATCGCCGTGTATCAGCGCCTGCATGGATACCCCTTTAGGCGCTGAAAACGTCAGGTCTGATGCCAGAC  
GCTTTTTTTGGCATCACCCACGTGTCGCTGCATATGCGTGAAGGTATCTATCTCTCCGACAAGCAGCTCTTAAACCGGGCTG  
ATTCAACGTCCCCGATAAGCCGAGGGCTTCAGCTCCGTTCCCTGCCAGGACGTGAATGATGAATCCTTACTGTAGTAATCA  
TCCTTGCATCAGAGTAGTAGCCACAACGCTAGTGACGTTCTGGCGGGTAATCGTGGTTATATCAAGCATCAGATCTCCCTCA  
GTTCAATGCCAGGAACAGGGTTTTGCGATGGTATTTAACGTGTTTAGCCTTGAACCTTAGCGACGGGCATATCACCAGGCAAC  
GCCAGATAGCCGGTGAGGTTTGGCAACATTGATATTTCCGGTAGGCGTTACGGCACGAACAACCTTAAACGTGCGGCGCTTAC  
GGACAATCCAGGGCTTCTGAGGATCGGATTCTTACGCTCAACTTCGCCTTCTATCTCACCGAGTGAGCGCGACATTTGATCC  
AACGTTTCATCACCGAGACGGCTGCCGCCAGCACGATGTTAGAACGCATGTTAGCCAGAATTGCTGAGCCATATCCCGACC  
ATAAACCTTAACCAGCTGAGAATAGGTTTGATAGCCAGCATAAACACACAGACCGCTTTTACGCCCTTTGGTCAGTGCATCGTT  
GAGGTTTGGCAGAACTGGAGTGATTCCAGCTCGTCAATAAATACATTAATGCGGCTTTCTTTTTACCCATACCCAGCACGAT  
AGAAAAAATCGAATCCAGCCAGCAGGAAATTAGCGGATTAAGTGACCTTTTCATTTCTTCTGCCAGGTGATAAACAGGGTTC  
CCGGCTTTCATCATCAAGCCAGTCACGCAGGGAAAAAATTACCTTCCGGCATTTCAAATGTGGGGCAAGATTCTTACTGAGA  
ACAAATCGCGCGCTTCCAACCTGCTTTTTTCAGACCCGGAAAAAATAGCTTCGGCAGGCGTCCCCATTAAAAATTCTTTAATTTT  
TTCTGGTCAACGTTACAGGCCAGTGAATAACTTCTCCATAGTTACTGTGCTGTATAGGCTGTGAAGTTTTTTTCGAACTTCA  
CTAAAAATAAGACGGCCATAGCCGAACCATTCTCAGTAGCCATATCAGGGCTTTCCTGAACAATAGAGTTCACTAAACGCTCG  
TAATCATATGAACGGCGAATTTTCATTGAAAAACACCCAGCCTTCAGTGCGTTTATCATAGGCGTTTAAATAACATCGCCGGGA  
CGATAGAAATCTTTAAGAACCCCCATTTGGATCTAAAGCAATATTTTTGCCGCTTAATGATGCTCTTAAATAACAGTTCATT  
GAAAATTGTGGTTTTACCAGTACCGGTTGTACCGGCAATCGAAAAATGCAAGTTCTCAGCGTATGTAGGTATGGGGATATTAG  
CCACGGTAACTGGTTGACACCTCTTTCGCGTGTTTTATCAGCGAGTGTTCTGGCGCGAACAAGCTCTGTACCACGATAAATCT  
TTTTGAATCTTTCGCTTTAAACACGCGTGATTTATCATAAATGATAAAAGCGATCAGACCGCCAACACCAATAAACAGCCAG  
CAATTAAGCTGACCATAAAGGCCATAGCGAAAAAGTATTCTTAACCAGATACGGAATCAGGTATTTAGCCGTGGATGGATCA  
ATACCGTAGGTAAATTTGCAACTAGAAACCATACCATCACTGGAGGCAAAGTAATTGCAAATAAAAATGCTAAGCCTCTTCT  
CTATCGTCCATTTACGCGCTCCTTTTTGGTTCCAGACTTTGTAGCCGTTACGTTCAACCTCTGCTTTTGCCGCTTTGGTTTTG  
CCCGGTTCTGCTATCGAGCGCAGGAGGATTAGCGTTTTCAATAGCGAGTGATTCATGCAACATCATCTGTCTGCCGGTGGGAA



TTTTACGCCAGATAGCGTTTCGGTTATTGCCTTCAGCTCATCGCGCAGTGGGCCAAAATCCGCATCTGAAGCACGGTCAAAAA  
GATAATCCAGTTTTCGATTACGTTCAGCCGGTTCGGCAACTATTTCAACCCGGACTCCCGATCACCTGGGCCAGCTTCA  
ATGCAGCGCCGAGATAATCTGACCGATTACCTCCTGAAACCAGGTCTATATAGGCCAAAAGTTCATCTGATACTTTTTCGGTT  
ATTATTGGCATTTCAGTCCCTCACATTGTGCATTTCTTAAACAAAAAATTGGGATCTAACAAAGCTGAAATCTTAGTATTACCAAAGT  
AATAAAGCAAACCTCATTATAAAACAATGGGTTATTGGGTGTTTTAATACCTAATTATTACCGAATATTGACGCTATTTATTTTTT  
ATCTTTTAAATCAGTACGATAGCGTGATTTATCGCGCTGCGTTAGGTGTATAGCAGGTTAAGGAAAAAAAATCATCTTTTTTGG  
TAGGAGCGACCTCCGTAGGTTAAGGGTCATTTGGCTAAAAAGCGTCCTATTCTTTGATGGTCATGCTTGCATGACCATCTGAGC  
AACCAAAAACTACAGATAAACTACAGAGAACTACAGATAAACTACAAAAAACGATTTACCTTAGCGTTGTCAGACTACTAATA  
GACTACAAGGAACTACAAAGAACTACAAAGAACTACAAAGAACTACAAATAGACTACTAAAACCGTGGCAGACTACTA  
ATAGACTACAAGAACTACAAATAAACTACAAAACCTGGATTGACCCCTTCTTACGAGTGTTGTAGAGTCATCTTCATACAACG  
GAGGGGGTTATGAATAAACAGCAGATCTGAAACCCCGCAACTTATCGGCTGCTGTGATGCGCTAAATGAAATCGAGA  
ACTGGCTGGACAGAGGGCTAACGCGGCATGAAATTGCTGAAATCCTCGACAGCGAATACAGCTTTTCGGTAACAGCCAAAG  
GGCTTGAGATGGCACTGTATAGAACGCGGCAAAACCGAAAAAATGTATTGCACAATACACATGATAAGAGTAGCGCGAAGGG  
TGCAGCGGAAAGTGATTGCACAATACACAACCGTCTGAGCCTGAAGCGCAGGAAAGTGAAAAAGCAGAGAGTCCCGGCAT  
TATTGATAAAGAGTTCTTCAATAAAATCGGTGAGGATTTCAACCCTAAGAAGTTCAACAAAAAATTCTGAGGTGATTTATGAAA  
GTAGCGGTAATTAATTACAGTGGCAGTGTTGGTAAAACATTAATTTTCATCTTACCTGTTAGCCCCGCGCCTGACTGGTGCAAAG  
TTCTATGCGGTAGAGACTATCAACCAGTCTGCTTCCGATCTGGGTATTGAAAATGTGACCAGTTTTAAAGGTGACGACTTCTCA  
CGTTTGATTGAGGATATTGTTTTGAAGATGCAGGCATTATTGATATTGGCGCGTCAAACGTTGAAGCGTTCCTGATGGCTATG  
TCTCGCTTTGACAGTGGCGCGAACGAATTTGATAAATATGTAATCCCGGTGACGCCGGATAATAAGGCGATTGATGAAAGCCT  
GAAAACGGCACACACGTTAAGTAAAGCGGGCGTGAGCAGCAAGAAAATTATCTTTGTTCCAAACCGTATTAGTCCAGACAGT  
GAAGTAGAAGATGTGCTGGCGCCGGTGTGTTGAGTTTGTCAAAGAAACGAAGATTGGCAAATAAGCAAGAAGGCTGTTATT  
TATAACAGTGAGGTTTTTCGAATATCTGGCGTTTACCGTATCTCATTTCGAAGTATTGACCGCTGAAGATCCAGAAGAATTCAA  
TCCCGTGCAAACAACAACCGATGCTGACGAGCGCAAAAAACTGGCACGCCGTTATACATACATGAAACAGGCGATTCCGG  
TAAAAGCTAATCTCGATAAAGCATATGCGGCTTAAATGGGAGAATAAAATGGAAAAGCAGCCGGATAAATTAGAAGTTCTGAT  
GGACTGGTTTTTAGGTGACGCGAAGGAAATCACCGCAACTCAGAAAGAAATGACGCAGAACTTTCTGAGCTTTTCGGAAAA  
GCTGGCAAAGACACCGAAAGTTTAGGAGAGACGGCAGACTCTTTTAAACGGGCTTTAGTAGAAAACCAGCGTTCAATTAG  
CCTGGCAATTAGTGATGATGCTAAGGCGCGCAGGAATTTCTAACTAAATTCCGCCGCGCGCAGGCGTCCAGTGCTGAGACG  
TTTACCCGTCAGATCCTTTTTATTACAGCTGGCTGCACCATCGTGGGCGCCGAGTAGGCGCCGCGATAGCGATACTTTTACTG  
AGATAAAGCAAACCGGGCGTGTCGGTTTTTTTTGTCAAGCGGAGCGCGGAGGCCGAAGGCCGAGGCATTAGTGGCCGC  
CGCCCGGTAAGCGGGGCGAGACGGGAACCGGCTCGAAGCGCAGCACGGCAGAACGGCCCCGAGGGGCAATGCCCGTT  
TTAATTCATCGTGACAGTCGCGCGTGACCATCACGGGGAGAAAAATAATGAATGACCGACAGCGAGAACTGGCCCGTATACG  
CCAGGCCCGCCGCGCGCGGCTCAAGGAAGAAGGCACAAGCGTGACAGTCACGCTAACAAAACAGGAAGAAGCAATGT  
TGCAGGAGCTGTGCCGGTTCGCCGTCCTGGACGAACGCCTTATTCAACGAACGAATTTTTCCAGCTGCTGCTTATCCGCAAC  
TGGCAGCAGTGGCAGGAGCAGAAGGCACAGCTGGGAAAATGCCAGGCTTGCAGGAAAGCTGAAAGCGGAGGGGGGGTGC  
GAGGGTGAACGGAAAGGCGAAACCTTTAACTGCTGGCTTGGCGTCAAGCCAATGAACTAAATTTGTAGTGTATTGTGCAAT  
ACACATTTACACAGAAACAAAAACCACCGCAATTCTGGAACCGGATACCTACGGCTATTCTGGGTGAACGGTACTTTTTG  
CACCTGGGTGCGCTGAAAAAGCTGAATATGCAGGGTGACGTTTCGCGTGCTGTTCTGCTTTGTAGACTGAATGCGCCAGCTATA  
CGCCTGACTGCTTAAACCTGGTAAAGTTCTGCAACCGGCACTGACCGGAAAGCAAGGCAGGGAAGACCTAAGCCAGAAACC  
TTGACTGCTCCCCGCCCTTCAGGGCGGGGATTGCGGATCATGTTCTTCTTTTCAGGGATTCAACGCAGACAAGAAAGGCTT  
TCAATTTCTATACGTGAACGGCCGCGCAGCGGAAAGAAACAAGCCCGTCAATCCGGGCTTGTCTTTTAGGCGGCTCAGA  
AATCGCCTAAAGGCCCGGCTTGGCCGGCAGTCAGTGCTATTTAGTTTGTTCAGCAGCTGGCTTAATTTTGGCCAGTGCA  
TACGTGATTGGAAAGCGCCTTGCAGGCGCTGATTAGGCAGCTGGTTGAACGCTTCGAGGCAGGCGCGCAGCAATAATTCTT  
TCTGAGATTGACTTCTTTTTTTCAGTTGGGAAGGGGTGGTAACTGTAGTCATGCTTGCTCCTTAGTGAGCCGATATCGGCAATT  
TTTCGGGTGGCGGTGTTGCCTCCCGATGATTTAATTATCGGTGATTATGCTTTTAAAGTCAATACAGGTACGGAATTTATTACC  
TGTTTTTATGCCCGTCAGGGCATGGAAGGCGACCGCGCCGGACTCCACCGGACACCGGCCCAAATCGCCGGAAACTGCGG  
GACTGACCGGAGCAACAGGCCAACCCCTCCCTGCTAAGCCATAACCCAGCCCGCCGACGAGCTGCCGACGTCCTCC

ACGGGGGTGCGCAGTGGGCGCCGCGCGCCTGCGCGCGGGTACGGCGGCCCGCCTGCGGGTTCGCGGCGCCGTACTGCGAG  
TTAGCGGCCCGCGCGGGCCGTTACGGGGGACACCGCACAGTCACGGCCAGTGCCCCGCTGAGCTGCACAATCCACGGAT  
AACACAATAGCGCACTGGCAAAGGATGCCGACGCCTGAAGGGCGTGGGCACCCCGAAGGGGCGGGGCGCCGCTTGCGG  
CCGGGCGAGTCCGGGCGAGGGTGTGGCCTGCCAAGCGGAGCGCGGAGGCCGAAGGCCGAGGCGTTAGCGGCCGCTGC  
CCGCGTAAGCGGGGCGAGACGGGAACCGGCTCGATGCGCAGCACAGCAGAGCGACCCCGAAGGGGTAACGCCCGGTGTG  
GCATCAGGATTTAGTGAATGGCAGAACATGAGCTGGAGAGATCACCGGCAAGCAGCAGCAAAGGGGCGGCACAGCCGCC  
CCGATGGCTGTTTGCCGATAACGGCGATTAATTAGAGCGGTGTTAATATCCCCCGCTTGCGGGGGACTAGGTTTCAGCAAG  
TCATGTTAAATACGTGTCCATCATGTAAACTGAAATCCCCAATAAACAGATCCCGCGCATAGGCTACGATGTCAAATATCGGGC  
TACGGATTCCGGAATATCATTAGTAGACCGCTATCATTAGGTATTCCTCTGCAAAAGTTTCTTCGCTCTTAGCTTCGCCATAT  
AGGCATCTCTAAACAGGTCGAAATCAGTGCTATTAACAGATCAACAAAGGCCACAAACGCCGCTTCGTTACCTTCCTCGCGG  
GCTTGTTTAAAGCCGTTAATAAAATCCAGTTGATATGGCACTCTGACGCCATACCAGACGGAATACCTCCCAATCTTGGAAC  
ATAAATTCTGGATCAGCCTCATTTGCGTGTAACCTCGCGCAGCGCTCGTAAACTCCTCTGAGCTATCAAATCGGTGAGATCG  
AGCCAGGCTCCCGCAATGCTTCCGCAAGTTGATTTATGGTAAGTGCCAACATAAACAGAAGGGGTGCTAATATCAGTCATGGT  
GTACTCCTTAAAGCGCCGATAACGGCAATTTTTCGGGCGGCGGTATTGCCTCCCGATGATTAATTATCGTTGATTATGCTTTA  
AAGTCAATACAGATACGGAATTTATTTACCTGTTTTATGCCCGTCAGGGCATGGAAGGCGACCGCGCCGGACTCCACCGGAC  
ACCGGCCGCAAATCGCCGAAACTGCGGGACTGACCGGAGCAACAGGCCAACCCCCCTCCTGCTAAGCCATAACCCAGCC  
CGCCGCCACGCAGCTGCCGCACGTCCCCACGGGGGTGCGCAGTGGGCGCCGCGCGCCTGCGCGCGGGTACGGCGGCCCG  
CCTGCGGGTTCGCGGCCGCTACTGCGAGTTAGCGGCCGCGCGCGCCGTTACGGGGGACACCGCACCGTCACGGCCAG  
CGCCCCGCTGAGCTGCACAATCCACGGATAACACAATAGCGCACTGGCAAAGGATGCCGACGCCTGAAGGGCGTTGGCACC  
CCGAAGGGGCGGGGCGGCCGCTTGCGGCCGGGCGAGTCCGGCGCAGGGTGTGGCCTGCCAAGCGGAGCGCGGAGGCCG  
AAGGCCGGAGGCGTTAGCGGCCGCTGCCCGGTAAGCGGGGCGAGACGGGAACCGGCTCGATGCGCAGCACAGCAGAGC  
GGCCCCGAAGGGGTAACGCCCTGTGTGGCATCAGGATTTAGCACAAATGTCAGAACATAAACTGGAGAGATCACCGGCAAGC  
AGCAGCAAAGGGGCGGCACAGCCGCCCGATGGCTGTTACTTGTCTTTGTCGCGTAGCACTTTGATTAGGCCGGTTACGGCC  
GTAATCAGAGCGGCCAGCGAGGTGATGATTTGCGGTAGTTTTGAGGATGGTAGAGTTCATATAGCACCTGTAGAGAAGTT  
GGCGGGGTGTCGTTTCCGACGGCCGCACTGTAACCGGGCGAATAAGGCAGGTTGTCAACAGCTTGAGCGAAGCGTCTGTTG  
ACAACCTGCCGCGCCCGTTTTACTGCGGTATAGGCCGAACGACCCACGCCAACGGAACGGCTTTATGACCGGGCAGCTG  
AGATAACCGGCAACCTGGCTGGCGGCTGACGCCAGCCGCAAGCGCCAGCGCGGAGGGCAAAGCCCGGAGGCCAAGCGG  
AGCGCGGAGGCCGAAGGCCGAGGCCGAGGCGTTAGCGGCCGCTGCCCGGTAAGCGGGGCGAGACGGGAACCGGCT  
CGATGCGCAGCACAGCAGAGCGGCCCGAAGGGGTAACGCCCGGAGTCTGCCGCTGTTTATCTCTCGTTCCATCTGAAATCG  
GCGGTAAGGCCATTAAGGGTCAAGTTTATCAGGGAGGCGTTAGCCCCCATGTTGTTAATCATCAGGCAATATCGTCTTTGTA  
GCAGGCATAACCGAAGCTAAGCTCTGTTTTATATAGTGGCGGGCAAAGTCCCAGGCATCGTGGCCGAAGTCTCATAATCTG  
CCAGGACGATTTGCGGGGCTTTGTGCCATTGCTGTACGGAAGAAAGCGGCAGAACAGGGCAGGGGTGCGACCAGTCAGTG  
ACGGTGTTCAGATCATATCTGCCAGACGCTCCAGGGAGCCGTAACCCAGCTCTGTGCGCAGATCCGCCACCATGCGTTGTTT  
ACGCAGTGATGCCAGATAATCAATCTCTTTGGTTATATCAGAATTAAGCGGGTCTGGTAATCCATGATGTAATCCTTTGCGCGC  
CGATAACCGCAATTTTTCGGGGCGACGGTGTTCCTCCCGATGATTAATTATCGGTGATTATGCCCTCAAAGTCAATATAAGTA  
CGGAATATGCATGCATAATTTTATATCTTGCAAAGCGTTCATAGAGTGCCTGAATCGCTTTCTGACAGCCTCAATAAAAAAAGG  
CGGGGATTCCCGCCTTTTTTTCTTACAGCTGCTTACGTGGCTTTTTACGCGTCATATAACGGTATCGCGCAGTCTACCGCGTA  
CAAAAAGCACGCCAGCGCGCCGCAACCGTACAGAAACGCAAGCGGCTTATTATCGAAGTAGCTGAAAACCCCTGTCGCCGC  
ACACAGGCCCAGAACAGAGACGCAGGCGCAGGTGATCTGCACCAGATCCCTGTATCCCGCACGAACGATAAACCAGGGCAG  
GGCAAGCGCAGCGGCGCTAATAATTAATGCGAGAGGGACAAAACGAGATAGTGATACATGTGAACTCCTTGATGGTTGCCG  
ATACCGGCGATTGTTTCGGGCGGCGGTATTGCCACCCGATGATTAATTAGAGTTTTGCGCGTCCAGGAGATTGACCTGAGCC  
GGGGTAACGTGAAACTTTTCCCCTTATGGATCACGTTATGCGGGGCGCTAATTCATCACTGATAAAGCTAACCGGGTAACGT  
TTTTTACCCAAATCCGCTCGCTAAACCATGCCACTTTTGCCGCTGGCCGATCCACTGGATGAACAATCACACCGGCCATGCTG  
CAACCCGTTGCGGGTTCGTCCAGCGTAATGCTTACCGGGACTGTATCCCGGTAAAAAACTTAACCGGCGGCACACCTGCCT  
GCGTAGCGGCTGCGACAACGCAAGCCCGATAACCGCTATCCGATTAATAAGCATTATTTCCCCTTACTCATGCTGATATCACC  
TTGCCAGCTGTTACCAGTTTACGAAATTCACCTTTCATGAATTTACGCCCCATGCTCAAGCGTTGAATACACGTTGCCGATAAGC

CAGTTACCAGCCGTTTTTGTCTCGGTATAACCACCATGCTTCTGTCAGAGTAAGCAGCGGTTGCTATCCTCGCCCTTCTCATAGA  
TCCAGATTTTAGTGACGTCTTTACCCGTTTCGTTGCTGCCCTGAATGGTAGGGTCAAAGGTATGTTCAATCTCTATATCGAAGTA  
ACGCTGAAGGAAGTTAGTAAAGTGCATGACGACTCCTGTAAGCGCCGATAACCGGCAATTTTTCGGGTGGCGGTGTGCCTCC  
CGATGATTTAATTATCGTTGATTATGCTTTTAAAGTCAATACAGGTACGGAATTTATTTACCTGTTTTTATGCCCGTCAGGGCATG  
GAAGGCGACCGCGCCGGACTCCACCGGACACCGGCCGCAAATCGCCGAAACTGCGGGACTGACCGGAGCAACAGGCCA  
ACCCCCCTCCCTGCTAAGCCATAACCCAGCCCGCCGCCACGCAGCTGCCGCACGTCCCCACGGGGGTGCGCAGTGGGCGC  
CGCGCGCTGCGCGCGGGTACGGCGGCCCGCTGCGGGTTCGCGGCGCCGTAAGCGGCGCCGACTGCGGAGTTAGCGGCCCGCGCGCGGCGG  
TTACGGGGGACACCGCACCGTACCGGCCAGCGCCCACTGAGCTGCACAATCCACGGATAATGCAGGAGACGAATCATGATA  
GGAGGCTGAAGGGGAAATGAGCGGCAGCAGGGGAAGGGGTTGCCAAGCGGAGCGCGGAGGCCGAGGCCGGAGGCGT  
CAGTGGCAGCTGCCCGCGTGAGCGGGGCGAGACGCGTAGCGGCTCGATGCGCAGCACAGCAGAACGGCCCCGGAGGGGT  
GACGTCCGGGGGTTTCGCTTTTAAAGATTTTCGACCACATCAGTAAATCGTAGTGACACCATGAAGCAAAAGTATCGTGCAGAC  
CAGAATCAACAACAGTAACAGCAGACCTTTTTTTCGACGTAATAAAACCGGCCCAAAGCGCCCGCAAGAAGCACACTCAAC  
ACGATTTCCGTTATACTAATCGTATTCATAATCTCTCACGTTTCCCTTTTTAGAACTCTGCCACACACAGATAAAAACCTTATAACA  
AGCTACAAAACCCGTTATTAGACGCGGTAATGCCTAGTTTTTTTGCAGTATTTAGATGACAAAGAAACCTTATCCACTTC  
CCGGTTACAAGGTGAATGATTGTGGCTTCATGCCCTTTAACAGAGTGGGATTAATACTCACGCTGAATGATATGCGTCTCTCCA  
TCATTTCCCGTCACGGCAATTAGGCCCTCTGTAGAACAGGGGTTGATACTACTAATGTTGGTGTGTTTTCGGTTTTGTTGAGC  
ATCGCTGATCCTCAAATATCGTTTTGTGTTACGTCTGCCGCTTTGCGCTGGATAAGCGACTTAAAGAAATCCGACGCCTTCAGA  
ATATCGCTATCCTGGAAGTCGGGAAATGTCGCTTCTGTACGCTCCTGCGCCGTACCTGCCCGTATAACGGTTTTATCGCGGATC  
ATCGTTCGCTTAACGCCATCAGCCTGTTTTTGTGTAAGGAGTGCCGGAAAATAATCGCGTATTGGCCGCCGCTATCCTGATGA  
ACAGAAGTATCCAGCGATGATTACCCTGTTTACGATAGTGGTGATAGATTTGCTGGCCGTAGCGCTCCTGATCGGAATTACGG  
TAATCGAACATTAACAGTTCCAAAGCATTAAACCGATCTGGCAATTGCCAGGCGGTAGGGTGTGTAAGTGTGCGTAACATAGT  
TTCCCCTGAGCGTGACAGTCACGATAAGGCGGGCTTTGCCCGCTGTTTATCAGTTAATCAATGGCACGATAAATACGATTCT  
GGTTTTCGTTCTCCAGCGTATTAACGTACTCCCGCAACAGGTGATACCGGTTAGCCATCGTTTTCGTTGATTTCGGCTTTGCCCT  
CTTCATATGCCAGGCCGCAAAAGTAACTGTAGGCATACAGACAAACAATAATCCCTACTTCGCGCGCGCTGCATTACCTTCAA  
AATAGTTAGGTAACGAGAGCCAAAGAGGTTGGGGCGCTTCATAAAAAACGCGCCATTGCTGGCCTGAAGGTATTCCCAATA  
CCCTCCCTGGTAGTCTTTAGCGTAACGATTAGAAAGGACTGAATGAAGTATGCTGCGCTGAAGAAAGCGCCACGAAATGCC  
GCAGGCATGAAGTTCATGCGGGCGTTTTTACGAAATGTAGCGGGCGGTGATTTGATAGTTTTCCATGATACTTCTCTTAAAGC  
CGATACCGGCGATGGTTAAGCGGCAGGCACATCACCTGCCACTTTTTAATTATCGTACAATGGGGCGTTAAAGTCAATATAAGT  
ACGGATTATATTTACCTAATTTTATGCCCGTCAGAGCATGGAAGGCGACCTCGCCGACTCCACCGGACACCGGGGGCAAATC  
GCCGAAACTGCGGGACTGACCGGAGCGACAGGCCACCCCCCTCCCTGCTAGCCCGCCGACGCGGCCGCTTACAGGG  
GACTGAGAAAACAGAAAGCCAACAACACTATATATAGCGTTTCGTTGGCAGCTGAAGCAGCACTACATATAGTAGAGTACC  
TGAAAACCTTGCCAACCTGACCATAACAGCGATACTGTATAAGTAAACAGTGATTTGGAAGATCGCTATGAAGGTCGATTTTT  
TGAAAGCTCCGGCGCCAGCCGGGTACACAGCATCCCTTTTTATCTGCAAAGAATTTCTGCGGGGTTCCCAGCCCGGCCAG  
GGCTATGAAAAGCAGGAGTTAAACCTGCATGAGTATTGTGTTTCGTCACCCCTCAGCAACTACTTCTACGGGTTTTCTGGCTC  
GTCAATGGAAGATGGCCGCATCCATGATGGTGACGTAAGTGTGTTGATCGCTGACGGCCAGCCACGGCTCAATCGTA  
GTCGCTGCATCCATAATGAATTTACCGTGAAGCGGCTACTGCTGAGGCCAGACCCTGCTGATGCCGATGAACAAAGATTT  
TCCTGTGTACTACATTGACCCGGATAATGAGAGCGTTGAAATCTGGGGAGTGGTTACGCATTCCTTATCGAGCATCCGGTATG  
TTTGCCTGATTGATGTCAATGGCATGTACGCCAGCTGTGAGCAGGCATTTAGGCCAGATCTGGCAAACCGAGCAGTGGCCG  
TTTTATCCAACAATGACGGCAACATTGTGGCCGTAATTACCTGGCGAAGAAAGCGGGCCTGAAAATGGGCGATCCGTACTTC  
AAAGTCAGACCCATAATCGAGCGTCATAACATCGCTATTTTTAGCTCTAATTACACTCTCTATGCCTCCATGTGCGCCCGGTTTCG  
CGGCCGTAGTTGAGTCCCTTGCAAGCCACGTGCAACAGTATTCAATCGACGAGCTTTTTGTTGACTGCAAAGGGATAACGGC  
CGCCATGAGCCTTGACGCTTTGCGGCGCAACTGCGCGAGGAAGTCAGGCGACACACAACGCTGGTATGCGGGGTGCGGTAT  
TGCCCGTACTAAGACGCTGGCGAAGCTGTGTAACCACGCTGCAAAAACATGGCCCGCTACTGGCGGGGTGTTGCTCTGGA  
CGATGGCGCCAGACTGAAGAAATTAATGAGCATCCTGCCGTTGCGGAAGTCTGGGGCGTCCGCCATCGTACAGAGAAAGC  
ACTCGCCACAATGGGGATCAAACGGTGTGATTAGCCAGGGCAGATACGCGCTAATCCGTAACATTCGGCGTTGTG  
CTTGAAGAAGCGGTACGGGAGTTGCGCGGCGAGGCTTGTTCAGCCTGGAAGAAACCCCTCCTGCGAAGCAGCAGATTGT

TGTGTCGCGCTCATTTCGGCCAACGCGTAGAAAACCTGACGGACATGCAGCAGGCTGTCACCGGATTTGCAGCGCGCGCAGC  
TGAAAACTGCGTAATGAGAGGCAACTGCCGCGTCATAAGCGTCTTTATCCGTACCAGTCCTTATTTCAGTGCGTGATACACA  
GTATGCCAATCAGGCAACCGAAAACTGACGGTGGCAACCCAGGACAGCCGCACGATAATTCAGGCAGCACAAAGCCGCGCT  
GGCGCGGATCTGGCGGGAAGATATTGCGTATGCAAAGCAGGGTTCATGCTGGCAGATTTTAGCGGGAAGGAGGCCAGC  
TTGATTTATTCGACTCTGCTACGCCTTCAGCTGGCAGCGAGGCTTTAATGGCTGTTCTTGATGGTATAAACCGGCGTGGAAG  
AGCCAGCTTTTTTTGCAGGCCAGGGCATCGATAACTCCTTTGCCATGCGTCGTCAGATGTTGTCACCTGATTACACGACAGA  
CTGGCGCTCAATACCAATAGCCACCATCAATAATTACCGGCGCCGTACACGGGCGGTTAACCCCTCAACCGGCCGAAACAA  
GTTTTCGGCACGGTTTTCGCGTTTTCGGTAAAAGCCGTTTTCTCTGTATAAAAGATCAGCTAAATTATGTGTATTGCACAATACAT  
ATATGTGAGGTTAGCAGTGAATTTGCCTACGCCCAGAACCTACGATGAACTTCAGAGAGCCTACGATTTTTTCAATGATAAGCT  
ATTCAGCAACGAGCTGCCGCCATGCCTGATAACGTTGCAGCGTGAGAAGCGAACGTATGGCTATTGTTCTTTAAGCGTTTTCG  
TCGGCCGTGAGAGTGGGTACACGGTAGACGAGATCGCTATGAATCCGGTGTATTTCTCGATCAGAACCATAAAGGCCACGCTT  
TCAACTGTTGCATGAGATGGTTCATCAGTGGCAATTCATTTTGGCGAGCCTGGCCGCGTGGCTATCACAACAAACAGTG  
GGCGGCCCGGATGGAACGGGTAGGACTAATGCCTTCTGATACCGGCGAACCGGGAGGCAGGAAAGTGGGCCAGAGCATGA  
CCCATTATATTATTGCCGGTGGCCCTTTCGATATGGCCTGTGATGAACTGCTGACAGGCCATTTCCGGCTTCTCTGGATGGACA  
GGTTTTCCGCCTTACCAGCCTAAGCCTGGCGCTGTGCTAAGCCCTACAGGAAAAGGCTATATTGACGACGAGGAAGATGATAG  
CGAACACGAACAGGAGGTGGAGGAAGGGCGCGACCCGTTGAACTCGACGACGAGATCATAGAGGCCATGCGATTTGTAA  
CCCCACCGCCTGAAGCACCGGTGAACAAAACAAACCGGAAAAGTACAGCTGCCCGGTGTGTCATATCAATCTCTGGGGTAA  
ACCGGGGATAGTGGTTTACTGTGGTGGCGAGCACTGTAATAAAGCCGCTTAGTAGTCTTAAATAAAGTCCTTTCGGACTTT  
ATTTTTTTCCATTTCCGAGGTCGTGATGTTAATGCTGTACTTCGCGGCTTCTTTTAAACAGTTTTTCAGCAAGGCTTGCTGG  
TATCCAGACCTGAACTAATTTAATGGTTCGCCGTTCTCGGCTTAAAGAGTGGTGTCTGGTACAAATCCCAGATTCGCTTAA  
GGTGCTGGAAATGTTTTGCTTGGAACGGCCTACTCGCATGGCTACGCTGATGATTTCTCACCTTTGACAAGCACGGAATAGC  
CAATATCTGTTGTGATGTGTGCAAAGGAAGCCATTTGCGGCAGCAGCTGTTTCCATTCTGTTTCTGAAATTCTGTTTTTCTGAG  
CCATCTGTGGCGCCTCCGTAGTTTTGTTACAGAAAGGATATACTCAGAATAAACAGGGGTCAATACAAGTACGATTTTTATAA  
ACTTTATTTTATTGAGGGTGGAGCCCGGTGCGGCAGCAGCGGGCCTCGATGGTGGCGCAAGGTGCTGGCGCCATGCT  
CGGATTAACATGAACCGTGAAGAACTGCGAACTTGTTCGCGGTTCTGAGGGGTTGACCGAGCCGCGAAGCGGCGCT  
GGTAAGCGATGATATGCACATATCCACAGGCATATTTTTAAAGGTATTTTATAGATTTTTTATCTTTTTAAAGTCTTTTATAGCT  
ATATAACTCATTGATTTAAATCATAATAAGTGTATCTCTGGGAATCCGCCACCTTGTATGGGAATTGGCCCACCTTACTAT  
GGGAAACAGCCACCTTACTATGGGAATTAGCCACCTTGTATG

>pQEB1\_inv1\_arsTn

GGAATTGGCCCACCTTAGACGAACTGTAAAAAATGTATTTACTTGTGGTGGTAGTGTGGAGAGTAATTTTTAAC  
CACAAAGGCAAGGCGCATGGATAAGTTGCTGAACAAAAGATAAAAGTTAAGCAGTCTAACGAGCTTACCGAAGCTGCTTAC  
TACCTCTCGCTAAAAGCAAAGCGCGTTCTCTGGTTATGTCTTATGCAGACGTATTTACAGCTTCAGTAAGCGAAGATGATGAT  
GAGATGGCTGTACTCGGTGACTCTACTTTCAAAGTAAAGGTGGCTGACTATCAGCAAATTTTTTCAGGTAAGCCGTAACCAGGC  
TATCAAGGATGTTAAAGAAGGCGTGTGGAGTTAAGCCGTTCTGCGGTAATCTTTTACCCGAAAGAGGGGCGTTTTGACTGC  
GTCGCGCGCCCCTGGCTAACAGAGGCTGGCAGCCGATCAGCTCGTGGTATCTGGGAAATCGAATTTAACCATAACTCCTGC  
GGTACATTTACGGCCTGACGAACAGTTCACCACCTACTCGCTCCGCGATTGTGGCAGTCTTCGAAATCCCCGGACGATCCGC  
CTTTATGAAAGTCTTGCTCAATTCAAATCTTCAGGCTTATGGGTTACTACTCATGCTTGGTAAATGACCGTTTTCTTTTGGCCG  
AATCCCAACAGAAGAAGTGGCAGAGTTGAAACGATCTTTCTTGATCCTGCACTCAAGCAGATAAATGAGAAAACACCTTTA  
CTTGCTAAGTATAGTATTGATGATTCAGGAAAATTTCTGTTCTCAATAATTGATAAGCAAATCCCGTCTGACATAAATCAGCAC  
ACATGAGCCTGTCATTTGACAAATTTTTGTCATGAAGATGGGCGAATTTCCACACAGCACCGGCGCCCGGCAAGATGGGCGG  
ATTCCACACGACAGCGGCGCCCGGCAAGATGGGCGGATTTCCACACTACAGCGGCGCCCGGCAAGATGGGCGGATTTCCA

CACGGCAGCGGCGCCCGCAAGGTGGGCGGATTTCCACACGGCAGCGGCGCCCGCAAGGTGGGCGGATTCTCACGCGG  
CAGCGGCGCCCGCAAGATGGGCGGATTTCCACACGGCAGCGGCGCCCGCAAGGTGGGCGGATTCTCACGCGGCAGCG  
GCGCCCGCAAGGTGGGCGGATTCCACACGGCAGCGGCGCCCGCAAGGTGGGCGGATTCCACGCGGCAGCGGCGCC  
CGGCAAGGTGGGCGGATTCCACGCGGCAGCGGCGCCCGGTAAGGTGGGCGGATTTCCACACGGCTGCCGCGCCCGCAA  
GGTGGGCGGATTTCCACACGGCAGCGGCGCCCGCAAGGTGGGCGGATTCTCACGCGGCAGCGGCGCCCGCAAGATGG  
GCGGATTTCCACACGGCAGCGGCGCCCGCAAGGTGGGCGGATTCTCACGCGGCAGCGGCGCCCGCAAGATGGGCGGA  
TTTCCACACGGCAGCGGCGCCCGCAAGGTGGGCGGATTTCCACACGGCAGCCTCGCCCGCAAGGTGGGCGGATTCCCA  
CACGGCAGCCTCGCCCGCAAGGTGGGCGGATTCCACACGGCAGCCTCGCCCGCAAGGTGGGCGGATTCCACACGGC  
ACCGGCGTGCGCAAGGTGGGCGGATTCCACACGGCACCGGCGCGGGCAAGGTGGGCGGATTCCACACGGCACCGG  
CGCCCGCAAGGTGGGCGGATTCCACACGGCAGCCGCGCCCGCAAGGTGGGCGGATTCCACGCGGCAGCCTCGCCCG  
GCAAGGTGGGCGGATTCCACGCGGCAGCCTCGCCCGCAAGGTGGGCGGATTCCACACGGCAGCGGCGCCCGCAAGG  
TGGGCGGATTTCCACACGGCAGCGGCGGGGCCAGTGGGATTAGGAGAATAGGTGTTTTACCGAATGCCCTGACGAGG  
CGTAAAAAAACCGCTTGCGGCGGCCTCATAAAGCAGAAAACCCGCTCAAGGCGGGTTATCTGCTCTGTAGCCTGTGATGCT  
TCGCGGGCATCCGGCAGCAGAGGTGAAATCTTCTTTTGGCATGTTAATTATACGTCTAACGCGGCATATGATCAAACCTG  
TATTAATAAGCCACTGTACCGTTTATAATGCTCTCAGATCAAAGAGGTAAAGCCCGTTTAGCCGCTGTGTGATGAGCCAGTT  
CAGACTCTTCAAATCGAATTTGGTACTAACAGGACCCGAACCGTGGGCAAGCACACGGCAACGGTATAGCCCTCTTCCGG  
TTTCGCACCCGGAAGCCTGGGCGGCAGCGTGGTGAAATCTTCTTTTGGTTAAGTGAATGGCATAACCGGATGGGCGGATTA  
GAGGAAAGGGGATTGCCTAGTAACCTACGCGCCACAGAGATGGAGGTGCGGGGAATGATTGAGCTGATTATCGCTATTCTGA  
CCTTAATTGCGGCTGTATTGCAGTTGATCAACTGGTTCCTTAATGGTGCCGAGTCTGTGAAGGTGAAAGCCTGAACGGGC  
AAAAGTAAAGGTTTATAGCCGTCCTTCGGGGCGGCTTTTTTTTCGGCAAATTAGGGTTTTACCGAATAATGCAGAGTTTTAA  
GGTGAGAATTTGCAGACTTGGCGTTTTACCGAACATAGATACTCCCTAGGCTGATAGGTGCATTAGTTATCACCTACCTGAAC  
ATATTGTAAGATGTCAGTCTCCAGTACTTGTGTACTATCAACTGACAAGACTCTTACACGCAACGCAGGGGGATGGAGTT  
TTATGCTTAGAAAAATAATCAGGGGTAGCGGATTCACTCAGTCAGAAGAAAACTGATAGAGTTCGCTGATGATGCTTTTTTT  
GGTCTTTGGTCTTATCCTAATGTTTATAGCGATGAGGGTACTCTAAAAATAAAATTGGGAAAGAAGTTAGTGACTTATTAGTTA  
TTTTTGATAAAGATATAATAATTTTTTCCGATAAAGCTATTACATACAATAAAAACAAAGATCCTAAGGTTGCATGGCAGAGATG  
GTTTAAAAAATCAGTCATACAGTCTTGACACAGTTATTTGGCGCAGAGAAGTTTATAAAGATCATCCCGAAAGACTTTTTGT  
TGACAAAGAATGCTCAGTTAACCTCCCATTAATAAGATAATTCTTTAATTTTCATTTGGTGGCCGTCCTAATAATATTTAG  
ATCCGGCGATCTCGTACTTTGACAAAATAGAAAAAGGCAGCTCTGCTACTTTAGTTAACATATTTCTTTAAACGCCCATCAATG  
TCTAGAAAATCCATTTTGTGTCGGAGACGTTTATCCTGATAAGACTTTTGTCCATATACTTTGATGAGACTGCCCTAAAACCTG  
TTAACCGAGTTAAACACAGCAACTGATTTTATTGGCTACCTAACGAAAAAGAGAGGGTTGTAAGAGAAAGAACATTATTGG  
TCAGCGCTGGGGAAGAAGAGACTCTTGCTGCTTACATTATGGGTGATAAAACCATAATATCAAAGAAATTTATTGAAACGAT  
CAAGGGATGACCATACCGGAAGGTGAATGGAAAAACTATAAAACCACTTTCAATTATCAATATCAGCTCTCAATGAAAAAGG  
TAGCGTTTTCTGGGATAACCTAATCCACAACCTTCTCGACAAGTATATTGTGAGCTAACGTTGGTTTTTTTAGTGAAATTGAATTT  
TCTACACATGAATTAGGTGTTAGAGAATTAGCCAAAGAAAGTAGGCAATCTAGATATTACCTTTCAAAGAACTTTAAAGAGAA  
ATAAAAACAACCTCAGCCTCATCTAAGAAGTCAAGAATGGTCAATCAATCGATGAGCCTGGAAAGTTTTACTTATTCTTTTT  
TTTTCTAACGATAGCAAGTTGAGTTACTCTGATTACAGAATCAACGTATATCTTATATAAATGCTTATGCTGAGGTTGCCTTTA  
ATAAATACAGACATATTAATAAATAATTACTATTGCAACAGAGCCGCAAATAACAGAAGGAAGATCTGAAGACCTAATATATA  
GCATATCCCAGAGAAATTTACCAAAGAGCAAATGAAAAAGCCAAAAGATTATCAAGAGAATACAAAATACTAAGTGATTTT  
TTACCTACTAAAACGACAAAGAGCGATAACTTTAAATCAGTTATATCAAAGGTGAAAAAATAGGGCGGAATACACCTTGTCC  
ATGTGGCTCCGGTGTTAAATTTAAAAAGTGCCATGGTGCGAATAATTAGCATTATTGTATGTATAACGGTAATGGCGCGGCAGA  
GAAACCGGCGCGTTCTGCCCTAGTGTTGGCCTGCGGGTTCCCCGCACCCGCTGTATGTAGTATCGGCAGCATCTGAGAAAA  
CCACTACATGTAGTTATCAGCGCCACAACGGCGCGGGGACGAGTGCAGTTTCGGAAAAATTGGGGTTTTACCGAATCCGGCA  
AAAGATTGCTTCTATAACGTCCGCTTCTGGCACACAGCAGCCGTTAAGATGTAAGGCCTTACGCCAACTAAATCTAATGGGA  
CAGATTTAGTTGGTGATGGTCAAGTAATCTGCAAACGGTCACCAAGTAAATGCAAATGGGTAGTCAAGTCCGATGCAATTAC  
GCACCCGGCAAGGTGGGCGGATTCCACACGACAGCAGCGCCCGCAAGGTGGGCGGATTTCCACACGGCAGCGGCGCCCG  
GGCAAGGTGGGCGGATTCCACACGGCAGCGGCGCCCGCAAGGAGGGCCGATTCCACACAGCACCGGCGCGCGGCA

GGTGGGCCGATTCCACACGACAGCAGCGCCCGGCAAGGTGGGCGGATTCCACACAGCACCGGGCGCCCGGCAAGGTGG  
GCCGATTCCACACGGCAGCGGCGCCCGGCAAGGTGGGCGGATTCCACACGGCAGCGGCGCCCGGCAAGATGGGCGGAT  
TCCACACAGCACCGGGCGCCCGGCAAGGTGGGCGGATTCCACACGGCAGCGGCGCCCGGCAAGGTGGGCGGATTCCAC  
ACGGCAGCGGCGCCCGGCAAGATGGGCGGATTCCACACGGCAGCGGCGCCCGGCAAGATGGGCGGATTCCACACGGCA  
GCGGCGCCCGGCAAGATGGGCGGATTCCACACGGCAGCGGCGCCCGGCAAGATGGGCGGATTCCACACGGCAGCGGC  
GCCCGGCAAGGTGGGCGGATTCCACACGACAGCGGCGCCCGGCAAGGTGGGCGGATTCCACACGACAGCGGCGCCCG  
CAAGATGGGCGGATTCCCATATCGACATGTATGTAGCTTGTGTTATCCGTGGATTGTGCAGCTCAGCGGGTTCGTTGTCTGATG  
GCGTAGTGTCCCCGTAACCGGCCGCGTGC GGCCGCTAACCGCGCAGTACGGCGCCGCGACCCGAAGGCGGGCCCGCTTCC  
CGCGCGCAGGCGCGGCGCCACTGCGCACCCCGTGGGGGACGTGCGGCAGCTGTGTGGCGGTGAGCGGGATTAGGG  
CTTTGCAGGGAGGGGGCTGGGTGCGGCGATACGTTTACGATTGCGGTTTCCGGCGATTTGCGGCCGGTGCCCGTTAACTC  
CGGCGTGGTTCGCTTCCATGCCCTGACGGCATAAGAAAATAAAACCGCCATGCTGCGGTTCATTATGATTTTGTGGTGTAGCG  
ATAAATAGTCATGCGAGAAACGTTGAAGCGCTTAGCAACTGCACCAACTGTCATTTAGGATCAGCAAGTAAGATTCTAATTT  
GTTTAAACATCTTCTCAGAAAGTGACGGTTTTCTCCCTCCACACGGCCCTTGC GCGTGCAGCTGCAAGGCCTGAGCGCGTT  
CTTTCAATATTGCGGTTGCGTTCAAAGCTAGAGAATATCGCCATCAGATGAGTATAGATTTCCCTATAACTGGCGCATTGTGT  
CTATTCTGTCTTGATGGCTATGAAAGTTATTCCGCGTTTTCTCAGGTGCTCGAGTAAAGTAATGACTTGACCCAATGAACCAC  
CGAGCCGATCTAGTGCCAACTACTAGGGTATCTCCCTCGCGCAATGCTTTAGGCGAGTTCTCCAGTTCCAGCGCACCTTTTT  
TGTCGCGCTTTGGGCCGCTACGTGAGGTCTGATCCTGATAGATTTGCTCACATCCAGCTTTTGTAGTTCTGCAACCTGGTGCG  
CCACATCCTGAAGATGCGTAGATTTACGGGCACTGTTGCAAATAGTCGGTGGTGATAAACTTATCATCCCTTTTGCTGATGGA  
GCTGCACATGAACCCATTCAAAGGCCGGCATTTTACGCGTGACATCATTCTGTGGGCCGTACGCTGGTACTGCAAATACGGCA  
TCAGTTACCGTGAGCTGCAGGAGATGCTGGCTGAACGCGGAGTGAATGTCGATCACTCCAGATTTACCGCTGGGTTTACGCG  
TTATGCGCCTGAAATGGAAAACGGCTGCGCTGGTACTGGCGTAACCCCTCCGATCTTTGCCCGTGGCACATGGATGAAACCT  
ACGTGAAGGTCAATGGCCGCTGGGCGTATCTGTACCGGGCCGTGACAGCCGGGGCCGCACTGTGATTTTTATCTCTCCTCC  
CGTGTAAACAGCAAAGCTGCATACCGTTTTCTGGGTAAAATCCTCAACAACGTGAAGAAGTGGCAGATCCCGCGATTATCA  
ACACGGATAAAGCGCCCGCTATGGTGC GCGCTTGCTCTGCTCAAACGCGAAGGCCGGTGCCCGTCTGACGTTGAACACCG  
ACAGATTAAGTACCGGAACAACGTGATTGAATGCGATCATGGCAAACGATAATCGGCGCCACGCTGGGATTTAAA  
TCCATGAAGACGGCTTACGCCACCATCAAAGGTATTGAGGTGATGCGTGC ACTACGCAAAGGCCAGGCCTCAGCATTTTATTA  
TGGTGTATCCCTGGGCGAAATGCGCCTGGTAAGCAGAGTTTTTGAATGTAAGGCCTTTGAATAAGACAAAAGGCTGCCTCA  
TCGCTAACTTTGCAACAGTGCCCTTTTAAAATATGCCTGTGGATATGTGCATATCATCGCTTACCAGCGCCGCTTCGCGGCTC  
GGTCAACCCCTCAGAACC GCGAAAACAAGTTTCG CAGTTCTTACGGTTCATGTTTTAATCCGAGCATGGCGCCAGCACCTTC  
GCGGCACCATCGAGGCCGCGCTGCTGCCGCACCGGGCCTCACCTCAAATAAAATAAAGTTTATAAAAATCGTACTTGTATT  
GACCCCTGTTTATTCTGAGTATATCCTTTCTGTAACCAAACACTACGGAGGCGCCACAGATGGCTCAGAAAAACAGAATTTAG  
AAACAGAATGGAAACAGCTGCTGCCGCAAATGGCTTCTTTGCACACATCAACAGATATTGGCTATTCCGTGCTTGTCAA  
GGTGAGAAATCATCAGACGTAGCCACGCGAGTAGGCCGTTCCAAGCAAACATTTCCAGCACCGTTAAGCGAATCTGGGATT  
TGTAACAGAACCACTCTTAAAGCCGAGAACGGCGAACCATTAAAATTAGTTCAGGTCTGGATAACAGCAAGCCTTGCTGA  
AACTGTTTTAAAAGAAGCCGCGAAGTACAGCATTAAATAACATCACGACCTCGGAAATGGAAAAAAAATAAAGTCCGAAAGGA  
CTTTATTTAAGACTACTAACGCGGCTTTATTACAGTGCTCGCCACCACAGTAAACCACTATCCCCGTTTACCCAGAGATTGA  
TATGACACACCGGGCAGCTGTACTTTTCCCGTTTTGTTTTGTTACCGGTGCTTCAGGCGGTGGGGTTACAAATCGCATGGCC  
TCTATGATCTCGTGCAGATTCAACCGGGTGC GCGCCCTTCTCCACCTCCTGTTTCGTGTTTCGCTATCATCTTCTCGTCTCAA  
TATAGCCTTTTCTGTAGGGCTTAGCACAGCGCCAGGCTTAGGCTGGTAAGGCGGAAACCTGTCCATCCAGGAAAGCTGGAA  
ATGGCCTGTCAGCAGTTTATCACAGGCCATATCGAAAGGGCCACCGGCAATAATATAATGGGTATGCTCTGGCCACTTTCT  
GCCTCCCGGTTCCGCGGTATCAGAAGGCATTAGTCTACCCGTTCCATCCGGGCCGCCCCTGTTTGTGTGATAGCCACGGC  
GGCCAGGCTCGCCAAATGGAATTGCCACTGATGAACCATCTCATGCACCAGTGTGAAAGCGTGGCCTTTATGGTTCTGATC  
GAGAAATACACCGGATTATAGCGATCTCGTCTACCGTGTACCCACTCTCACGGCCGACGAAACGCTTAAAGGAACAATAGCC  
ATACGTTTCGCTTCTCAGCTGCAACGTTATCAGGCATGCGGCGAGCTCGTTGCTGAATAGCTTCTCATTGAAAAAATCGTAGGC  
TCTCTGAAGTTCATCGTAGGTTTCCGGCGTAGGCAAATCACTGCTAACCTCACATATATGATTGTGCAATACACATAATTTAG  
CTGATCTTTTATACAGAGGAAACGGCTTTTAGGGGTGCTTTGCGGGAGAGGGCGAAATCCTACGCTAAGGCTTTGGCCAACG

ATATTCTCCGTAAGATTGATGTGTTCCAGGGGATAGGAGAAGTCGTTGATATCTAGTATGACGTCTGTCGCACCTGCTTGA  
TCGCGGCCGCGATAGCTAGATCGCGTTGCTCCTCTTCTCCATCCGCGTTCCAAGCTGCGGAAAGGCACCCATAAGCGTACGCC  
TGGTCGAGCAGGCGACGCGGATCGACGTCAGCGCACGAGAGAATGCGTCCGCCATCTGTGCAATGCGTCTAGGATCGAGA  
CAAAGGTCGTCTCTGTCAGCCGGATCGTAGAACATATTGGCGGCGCCAAAGCCACTTCACCGACCAGACCGACGGGATCTA  
TCACCAGCCAGCCGCGACTGGAGAACATGATGTTTTTCATGATGCAGATCGCCATGTAGCCCACGCAGTTCCGAGGCATTGCTC  
ATCATTGATCGGCTATAATCGCCGCGTGGACGTAGTCAGTTTGACAACCTGCGTTTTGATCATCGCGCGCCCGCTGAAACAA  
AGCTGCAAAGCGATCCCGGATCGGGAGAAGGGCAGAAGGCAGGGGTTCTCAGATGCGGCATACAGCTTCGCCATTAGTTC  
CGCTGCAATTCGGTCGCTGGTAGTCGCCGTGCTCGGCAACGATGTGAGAGAGCATTGCTCCCGGCATATTGAGCAAC  
ATCAGATTGTTCTCACGACCGAGCAACCGGACTGCTCCCCTCCCATTGCGCCATACAGATAGTCGGCCCCGCGCAGTTCATC  
AGCAATGTCTTCTATAGTTTTCAATCCCTTGACGATTGCAGGAGTCCCGTCTGGCAATGAACTTTCCAAACGAGGCTGGAAA  
AGGTGTCCGCAATGAGAACAGGTTGCGAAACGTGCCAATGAGCAGGAAAAACAGGCGGCATGAACATCAACCCCAAGTCA  
GAGGGTCCAATCGCAGATAGAAGGCAAGGCGTTGCGGTCGGGGGCTTCGATCCCCAATACATTGAATAGGACAGCGAAGG  
CGCGCTCTGCTTCATCTGGCGCTGCCAGTTCTCTTCGGCGTTAGCAATCATGAGTGCCAAATCGGCATAGCGATCTGCTGTT  
CGAGCCGCCAAGGTCGATCAGACCCGTGCATTGAAGAGTTTTAGGGTCCACCATGAAGTTCGGCATGCAGGGATCACCATG  
GCAAACAACCATATCGGTGCGCTCTTGGTCGAGCCGCACCGGTAGCTCTCGTTGACACGAGCCAAAAGATCGAGCTGCGGC  
GTACTCTTGTCTCGTCCGTAAGAAGTCGGGATTGACGGCATTGCGGGACACCACATCAACGGCGCGTCCGAACATTCGCG  
ACAGCCTGCGCTCAAACGGACATTGATCAACCGATAGGCTGTGAACAGCGCCAAGTTGCTGCCCCATTGACGGCCACGCTTT  
GAGCAAATCCGCTCCAGACAGATCAGCCCGGTACTCCCGGAATTGCCGTTATACCAAGCATGCACCCTCCTGTTCTCCT  
GCCAGTTGATCACCTCGGGGCAAGCCACACCTCGACCTTTGAGCCAAATGAGGCGGTACGCTCTCCAGCGAGCTCACCGC  
GGCGGGAAGCAGGTGCGATTTTCGCGAAGGCATGCCCGTACCACGTGAAAAACAAAATCACCAGATTCTCCGCCTCTGA  
CAGGCAACCAGTCAGAATGCGATTCACCAAAAAAATATTAGTTGATTCAATGGAGGTTCTTCAGTTTTCTGATGAAGCGC  
GGAGGTGGCTCAACCTGCGAAAAGAAACGAGTTGCTACGTAAGTCCGAGAACATGCTTTCATGGTCTCTGAGCTCGCCTTG  
ATGCCCCGAGGCATAGACTGTACAAAAAACAGTCATAACAAGCCATGAAAACCGCCACTGCGCCGTTACCACCGCTGCGTTC  
GGTCAAGGTTCTGGACCAGTTGCGTGAGCGCATACGCTACTTGCATTACAGCTTACGAACCGAACAGGCTTATGTCCACTGG  
GTTTCGTGCCTTCATCCGTTTCCACGGTGTGCGTCACCCGGCAACCTTGGGCAGCAGCGAAGTCGAGGCATTTCTGTCCTGGC  
TGCGCAACGAGCGCAAGGTTTCGGTCTCCACGCATCGTCAGGCATTGGCGGCCTTGCTGTTCTTCTACGGCAAGGTGCTGTG  
CACGGATCTGCCCTGGCTTCAGGAGATCGGAAGACCTCGGCCGTGCGGCGCTTGCCTGGTGTGCTGACCCCGGATGAAGT  
GGTTCGCATCCTCGGTTTTCTGGAAGGCGAGCATCGTTTGTTCGCCAGCTTCTGTATGGAACGGGCATGCGGATCAGTGAG  
GGTTTGCAACTGCGGGTCAAGGATCTGGATTTGATCACGGCACGATCATCGTGCGGGAGGGCAAGGGCTCCAAGGATCGG  
GCCTTGATGTTACCCGAGAGCTTGGCACCCAGCCTGCGCGAGCAGCTGTGCGTGCACGGGCATGGTGGCTGAAGGACCAG  
GCCGAGGGCCGAGCGGCGTTGCGCTTCCCAGCCTTGGAGCGAAGTATCCGCGCGCCGGGCATTCTGGCCGTGGTTC  
TGGGTTTTTGCGCAGCACACGCATTCCAGCGATCCACGGAGCGGTGTCGTGCGTCCCATCACATGTATGACCAGACCTTTCA  
GCGCGCCTTCAAACGTGCCGTAGAACAAGCAGGCATCACGAAGCCCGCCACACCGCACACCCTCCGCCACTCGTTGCGGAC  
GGCCTTGCTCCGCAGCGGTTACGACATTCGAACCGTGCAGGATCTGCTCGGCCATTCCGACGTCTCTACGACGATGATTTACA  
CGCATGTGCTGAAAGTTGGCGGTGCCGGAGTGCCTCACCGCTTATGCGTGCCTGCCCTCACTAGTGAGAGGTAGGGCA  
GCGCAAGTCAATCCTGGCGGATTACTACCCCTGCGCGAAGGCCATCGGTGCCGCATCGAACGGCCGTTGCGGAAAGTCC  
TCCCTGCGTCCGCTGATGGCCGGCAGCAGCCGTCGTTGCCTGATGGATCCAACCCCTCCGCTGCTATAGTGCAGTCGGCTTC  
TGACGTTCAAGTGCAGCCGTTCTGAAAACGACAAACGATGTCAGCCAATAAGTTGTTGTAATAATCGACAAGTGTGTTGTTGC  
AACTCGCCGTCCTGTAAGACTGCATTATCAGTCTGATTGAGGGCGGCTATGGTGTGCTTATAACCCATAAACCGATGACGGCT  
GCACGTAAATCTGTGGATGCTCTTGTGCGATTCAACGTTTGTGTTCCACGCATGGCGACAGCATTGTTTAGCCCAGCAAT  
AATCCCATTATAAGTTGGGGGAGGGGCTCCGACAACTGCAAAGCTATCTTTTCTGTATTGTTTTGGATGTCGTCCGCAAGAA  
TGGTATTCTCGATCAGTTCTCGAGCCAATAATGATGTTTGAAGCAGACGGCCAACACCGTCTGCTTCGTTTCTGGTTCTTGT  
CTTCCACTGCCAGCGGTTACTGATTGTTACGCACGTAAGTAGCAAAGTGAATGCGCTCTTGAGTCTCATCAACGGTTGCCTCC  
ACAGTCTCGCTGGCACTGGAATCAATGTGAAAATTGTTCTGGATCGGATCAACAGGAATAAATCGATCACAGTCGAACTCTCT  
TGGAATTATGGTCATGTGCAGTTTCGTTGCTGATGAAAGAGCTTGAATGTACAACCTTCTCCCACCAATGACAGCAATGCGTTG  
ATCGGTATTCTACACAGTTGATCACAGCACGAAGATCAGGAACGACAGTAGCGCTATGACATCTTCTGTTTTAACGTCGA

GGAGATCACGAACGATTTCGCGTTCGGGGAGAATTCCTTTCTCCTTGATTTCGCTCCTCGGCGCCATCCTTTTCTAACTGCATGTC  
ACGCATGTCAGTATACGTGTGTTTCCCATAACGCACACGCGGATCTCTTTAGAAATCCGCGTAAATCGCGCCATGTCTTCTTTG  
CATTTCCATGGAATCTTGCCGCTTTCCCGAATCCCAACTTAGAATCCACAGCGACTATTAGCTCAAGTTGTGGGTGACTCATT  
AAAACCTCAAACCAGTCGATGCTGGTTGTTCCAGATATTGCTTACGGAAGGTGGCCAGATCAATCAGTTTGATATTTGCCTTTC  
CGCTGTTGTTGAGATCGTGCACCTTTCTCAATTTGCCGGAAGATCCGGAAGTGGATGCCGCGATCACCATGGTGGTCTTCGAC  
GAGACTGATGATTGCACTTCACCACCCTCAGCTTCAATCAGCTTCTCCAAGGCCGCGTCACGAAAACCGGTGATCACGATCTT  
CTCACCCGTAACGATCCCCGAAGTGACCTGCTGTTTGAACCCGATGATTGATTGAATCTTGTGTAATAGCTCGGCATGTTG  
AGCCATACCTGCAAGCACTTTTGCGGCAGTTTTGTAGCTGAATTTGTGCGACGCTAACGATCTGCTCTTCGGTGATGGCATTGA  
AATCATCCAAGTCTTAATATCCAAGCCTTCACACAGAGCTTTCATCTTGCGGCGCCCAACGCCGCGCCCAAGTGGGGC  
GACCCCAACCAACCGACAGGGGAACACTACTGGGTATAGGAAGTATAAACCCACTTTTTGCTCCTCATCCGAAGTATCTTAC  
CTGAAATTCCTCACTCGTTTACCGCTCAAGCCCCAATTTTAACTGCCGGTCCAGCCTAAACCGCTCTAATAAGTTTCGATTTG  
GCGGTAAAATCTCTAGCCTGATAGCTCGAGAGATAAACTGCCCCACCGCCCCGTTTAAAAGTTGGCAGTGTGAGCAGTG  
TTGGATTTGGGGTCGTCAGTCAAAGAGACGACTCTGTGATGGATCGAACAGGCTGGGAGTCAGTGGCGGCGCTCGTTCTGG  
TGGCAGCTCACGCTGCTTGGCGGCATTCGCTTGGCTGTTTTCTGTTTCAGATGCTTGAGAATCTGCTCAATGACCTTCGGATC  
TTCGATGCTGGCAATCACTTTGACGTGACCCCGCAGTGTTGCGCAGACTTCAATATCAATATTGAAGACTCGCTTGAGGCGTT  
GCATCCAGGTCATGGCGCGGTGGCGCTCTGCAGGACTCTTGTACGCCAGTTAGTATCGAGACCTTCCGATTTGTCGGGCTTC  
TTGCCCGCTTGGCGGGTGTACTTGAACCTCGGTGTTTCTGTTTCGGTGCAAAGACGCCGTGGAAGCGTGTGAGGTTGACTC  
GCGGCTTAGGTACCAACGCAGCGAGTTTGGCGATGAAGTCCAGCGCTCGAAGATCACATGGGTGGTGCCATTGCGGTACG  
GAGTTTTGAGCTCGTAACGCACCTGCCATTGGCGGTTAATGCCAGACGTTTTTCTGAAACCGCTGGCCGACTAATGTAGCGA  
CACAAGCGCTCAAGCTTATCCCGCTGATGCGCTTCCGCCATCACACCGCGTGTAGCGAGAAACAGCATGGTTGGCTACTC  
GACTGCTTGAGTCGGCTTTATCCTCACGCCCTGGCAAGTTTGCAGGGTGAAGACTTTGCGCCCTTGCTGGGGGCGACGG  
CAATGCGATACGTAACCGAAGCACCATGTAATTGAGTCAGCGTATCGTCTTCGCCCTTCCAGTGTCAACCACGTATTCTCGG  
CATCACGCTCCAAAATCCCACGCTTTTCCATGCAGCGAGCGATGCGATGGCTGAGGGTGTGAGCGAGCGTATTGAGCTCATCG  
TAAGTGGGTGCCTTGACACGATGGAAGCGTTGCTTGGCATAGTCATCTTCGGCATAGACACCATCGAGAAACAGCATGTGGTA  
GTGGACATTGAGATTTAGCGCGGAGCCAAAGCGTTGGATAAGAGTCACTGAGCCAGTTTGTGCGAGAGGCTTTGGTGTAAAC  
GGCTTTTTTATGATCAGATGAGTTGAGAGGTACGATAGACGATACTCAAGACCTGGCCATCAGCTGGGGATGGCGAGCCAGC  
AAAAGCGTAGCTGGAAAGGAAAGCTGAGCACCCACTGGCGAATGGGCTCCTTGGGGAAGACTTCGTCTATCAGCAGCGCC  
GCACTCTCGGCCATCCGGCGGGCACCAGCTAGGGCAAAGCCGCGTCTGTTTACAGCTGAAGGCGACCAGACGCTCGTGA  
TGACAATCCTCGCAGCGAACCCGCATGAAACCATACTCCAGACGGCCACATTGGAGGAGGTCGTTGAATCTTGTGGATGTA  
GCGAGGCAGGTGTTGACCTTGGGCTTCGAGTGAGGCTTTGAAGGCTGGGTAGTGCTGCTCAACCAGCTGGTAGAGCAGCG  
TCTGGTTCGGGTTGGTGGCGTTTCGTAACCGTTTGTGTTGAGTGGGCGATTGACTCGCCGTGGCGTTTCTTGGCAGCGACATGGG  
TATCCTCCGCTGATACTGTGGTTATGTACAGTATCAGCGGCTTGCCTCAGACGTCCAGTCTGGCCCTAGACATCGCTAAATGCT  
TAACCCGCAATAGCCCTCACGAGTTGTTATCAGCCACTACCGGTTGAGCGAGAAGGTTTTGGGTTTCAGGGTGCTATTGCTCCA  
CCAATCACAATACTGAAGCCCCAACTGTTATCAGTTGGGGCTTTTTCTTGTCTGTTTGGCGCGGTTGCGTTTTATCGGTAGTCG  
TCGAGCTCTGCACCATCCACATAAGAGCTTAACGGTGCATCTTCAACGCCATCACACAAAACCTTTCTTTTTTACGCACAGTC  
AATTATTGGATGTTTTATTAACAACCCAAAAGGAGATATTTAGCGGGCGGCCGGAAGGTGAATGCTAGGCATGATCTAACCC  
TCGGTCTCTGGCGTCGCGACTGCGAAATTCGCGAGGGTTTCCGAGAAGGTGATTGCGCTTCGCAGATCTCCAGGCGCGTG  
GGTGGCGGACGTAGTCAGCGCCATTGCCGATCGCGTGAAGTTCCGCCGCAAGGCTCGCTGGACCCAGATCCTTTACAGGAAG  
GCCAACGGTGGCGCCCAAGAAGGATTTCCGCGACACCGAGACCAATAGCGGAAGCCCCAACGCCGACTTCAGCTTTTGAAG  
GTTTCGACAGCACGTGCAGCGATGTTTCCGGTGCGGGGCTCAAGAAAATCCCATCCCCGATCGAGGATGAGCCGGTTCGGC  
AGCGACCCCGCTCCGTCGCAAGGCGGAAACCCGCGCCTCGAAGAACCGCACAAATCTCGTCGAGCGCGTCTTCGGGTGCAAG  
GTGACCCGGTGCGGGTGGCGATGCCATCCCCTGCGCTGAGTGCATAACCACCAGCCTGCAGTCCGCTCAGCAATATCGGGA  
TAGAGCGCAGGGTCAGGAAATCCTTGGATATCGTTCAGGTAGCCACGCCGCGCTTGAAGCGCATAGCGCTGGGTTTTCCGTT  
GGAAGCTGTGATTGAAACACGGTGCATCTGATCGGACAGGGCGTCTAAGAGCGGCGCAATACGTCTGATCTCATCGGCCGG  
CGATACAGGCCTCGCGTCCGGATGGCTGGCGGCCGGTCCGACATCCACGACGTCTGATCCGACTCGCAGCATTTCGATCGCC  
GCGGTGACAGCGCCGGCGGGGTCTAGCCGCCGCTCTCATCGAAGAAGGAGTCTCGGTGAGATTGAGAATGCCGAACACC



GTCACCATGGCGTCGGCCTCCGCAGCGACTTCCACGATGGGGATCGGGCGAGCAAAAAGGCAGCAATTATGAGCCCCATAC  
CTACAAAGCCCCACGCATCAAGCTTTTGGCCATGAAGCAACCAGGCAATGGCTGTAATTATGACGACGCCGAGTCCCGACCA  
GACTGCATAAGCAACACCGACAGGGATGGATTTTCAGAACCAGACGCAGCCGCGAGGCCGAAACTAAACCGATGTCTGTA  
GGGTTACCGCTGGATCTGCGTGAATTCAGCAGCAGCAAGAGAAAGACTTTTCTACAAACCAGCTTACAGCAGGCAAAAATTTA  
ACCAGAAAAAAGCCGCTGAATTACTGGGTCTGACTTACCATCAGCTTCGCGCTTTGCTGAAAAAACACCAGATTTAACGCAC  
ATTTGCAGATGTTATATTGGCGGATTTGACGCATAACCTCATCAGGGTTTACCATGACGCCATTACTGTATAAAAAAACAGGCA  
CAAAATATGGCTCTGGCACTCGTTGGCGAAAAAATTAACAGAAACCGCTTACCGGTGAGAAAATTGAAAATAGTACATTTTT  
TAACTGTGATTTTTTCAGGTGCCGACCTGAGCGGCACTGAATTTATCGGCTGTCAGTTCTATGATCGTGAAAGCCAGAAAGGGT  
GCAATTTTAGTCGTGCGATGCTGAAAGATGCCATTTTTAAAAGCTGTGATTATCCATGGCGGATTTTCGCAATGCCAGTGCGC  
TTGGCATTGAAATTCGCCACTGTCGTGCGCAAGGCGCAGATTTTCGCGGCCAAGTTTTATGAATATGATCACTACTCGCACCT  
GGTTTTGCAGTGCATATACACTAACACAAATCTAAGCTACGCCAATTTTTCGAAAGTCGTGTTGGAAAAGTGTGAGCTGTGG  
GAAAACCGTTGGATGGGGGCCAGGTAAGTGGCGCGACGTTTTCAGTGTTTTCAGATCTCTCCGGCGGCGAGTTTTCGACTTTC  
GACTGGCGAGCAGCAAACTTCACACATTGCGATCTGACCAATTCGGAGTTGGGTGACTTAGATATTCGGCGCGTTGATTTACA  
AGGCGTTAAGTTGGACAACCTACCAGGCATCGTTGCTCATGGAACGTCTTGGCATCGCGATTATTGGCTAGTCTTCAGGGAGC  
GGTGAATATTCCGCCCCCTGCACAGCTTTTTACCCTTACGGCATCGCTGAAGAGTGGTGTGTGGAATTTTTCCACTCTTACCG  
TCCCATGCATAAGTGAATGTGTAGCGGGCTGAAACCGTTGATTTGTCCGCGAAGGTAAATGTGTAGGTACCGGTGTCTATCGC  
CTTATTACACCCAGGCGAATGGTACGCATGTCAATTTTCCCGGTGGCTTTTTTCGCAAGAAAATGCTCGAAATAAGGCACTG  
TTGCAAATAGTCGGTGGTGATAAACTTATCATCCCCTTTTGTGATGGAGCTGCACATGAACCCATTCAAAGGCCGGCATTTC  
AGCGTGACATCATTCTGTGGGCCGTACGCTGGTACTGCAAATACGGCATCAGTTACCGTGAGCTGCAGGAGATGCTGGCTGA  
ACGCGGAGTGAATGTCGATCACTCCACGATTTACCGCTGGGTTTTCAGCGTTATGCGCCTGAAATGGAAAAACGGCTGCGCTGG  
TACTGGCGTAACCCCTCCGATCTTTGCCCGTGGCACATGGATGAAACCTACGTGAAGGTCAATGGCCGCTGGGCGTATCTGTA  
CCGGGCCGTGACAGCCGGGGCCGCACTGTCGATTTTTATCTCTCCTCCCGTCGTAACAGCAAAGCTGCATACCGGTTTTCTGG  
GTAATAATCCTCAACAACGTGAAGAAGTGGCAGATCCCGCGATTATCAACACGGATAAAGCGCCCGCCTATGGTCGCGCGCT  
TGCTCTGCTCAAACGCGAAGGCCGGTGGCCGTCTGACGTTGAACACCGACAGATTAAGTACCGGAACAACGTGATTGAATGC  
GATCATGGCAAACCTGAAACGGATAATCGGCGCCACGCTGGGATTTAAATCCATGAAGACGGCTTACGCCACCATCAAAGGTAT  
TGAGGTGATGCGTGCCTACGCAAAGGCCAGGCCTCAGCATTATTTATGGTGTATCCCTGGGCGAAATGCGCCTGGTAAGC  
AGAGTTTTTGAATGTAAGGCCTTTGAATAAGACAAAAGGCTGCCTCATCGCTAATTTTGAACAGTGCCGTACCGACGGTG  
ATATGGGGCAAATGGTGGTACCATCCTGTGCGGCTGTGGCACAGGCTGAACGCCGGAGGATCCTAGAACGCACGAATGAGG  
GCCGACAGGAAGCAAAGCTGAAAGGAATCAAATTTGGCCGACGGCGTACCGTGGACAGGAACGTCGTGCTGACGCTTCATC  
AGAAGGGCACTGGTGAACGGAAATTGCTCATCAGCTCAGTATTGCCCGCTCCACGTTTTATAAAATTTCTGAAGACGAAAG  
GGCCTCGTGATACGCCTATTTTTATAGGTTAATGTCATGATAATAATGGTTTTCTTAGACGTGAGTGGCACTTTTCGGGGAAATG  
TGCGCGGAACCCCTATTTGTTATTTTTCTAAATACATTCAAATATGTATCCGCTCATGAGACAATAACCTGGTAAATGCTTCAA  
TAATATTGAAAAAGGAAGAGTATGAGTATTCAACATTTTCGTGTGCGCCCTATTCCTTTTTTTCGGCATTTCCTTCTGTTT  
TTGCTACCCAGAAACGCTGGTGAAGTAAAAGATGCTGAAGATCAGTTGGGTGCACGAGTGGGTTACATCGAACTGGATCT  
CAACAGCGGTAAGATCCTTGAGAGTTTTCGCCCCGAAGAACGTTTTCCAATGATGAGCACTTTTAAAGTTCTGCTATGTGGT  
CGGTATTATCCCGTGTGACGCCGGCAAGAGCAACTCGGTGCGCCGATACACTATTCTCAGAATGACTTGGTTGAGTACTCA  
CCAGTCACAGAAAAGCATCTTACGGATGGCATGACAGTAAGAGAATTATGCAGTGCTGCCATAACCATGAGTGATAAACTGC  
TGCCAACTTACTTCTGACAACGATCGGAGGACCGAAGGAGCTAACCGTTTTTTGCACAACATGGGGGATCATGTAACCTGC  
CTTGATCGTTGGGAACCGGAGCTGAATGAAGCCATACCAAACGACGAGCGTGACACCACGATGCCTGCAGCAATGGCAACA  
ACGTTGCGCAAACCTATTAACCTGGCGAACTACTTACTCTAGCTTCCCGGCAACAATAATAGACTGGATGGAGGCGGATAAAGT  
TGCAGGACCACTTCTGCGCTCGGCCCTCCGGCTGGCTGGTTTATTGCTGATAAATCTGGAGCCGGTGAGCGTGGGTCTCGC  
GGTATCATTGCAGCACTGGGGCCAGATGGTAAGCCCTCCCGTATCGTAGTTATCTACACGACGGGGAGTCAGGCAACTATGGA  
TGAACGAAATAGACAGATCGCTGAGATAGGTGCCTCACTGATTAAGCATTGGTAACTGTCAGACCAAGTTTACTCATATATACT  
TTAGATTGATTTAAACTTCATTTTTAATTTAAAAGGATCTAGGTGAAGATCCTTTTTGATAATCTCATGACCAAAATCCCTAAC  
GTGAGTTTTCGTTCCACTGAGCGTCAGACCCCGTGTGACACCGGCGTACCCTCGGTGCTATCTTCGCGCCCCAATAGTCGGG  
GCTTGGCCAGGACTTCTGAGGCCGTCCGTAACCTCAACAAGGAATATCGTTGATGTCACTGTATCGCCGTCTAGTT

CTGCTGTCTTGTCTCTCATGGCCGCTGGCTGGCTTTTCTGCCACCGCGCTGACCAACCTCGTCGCGGAACCATTGCTAAACTC  
GAACAGGACTTTGGCGGCTCCATCGGTGTGTACGCGATGGATAACGGCTCAGGCGCAACTGTAAGTTACCGCGCTGAGGAG  
CGTTCCCCTGTGCAGCTCATTCAAGGGCTTTCTTGCTGCCGCTGTGCTGGCTCGCAGCCAGCAGCAGGCCGGCTTGCTGG  
ACACACCCATCCGTTACGGCAAAAATGCGCTGGTTCCGTGGTCACCCATCTCGGAAAAATATCTGACAACAGGCATGACGGTG  
GCGGAGCTGTCCGCGGCCCGCTGCAATACAGTGATAACGCCGCCCAATTTGTTGCTGAAGGAGTTGGGCGGCCCGGCC  
GGGCTGACGGCCTTCATGCGCTCTATCGGCGATAACACGTTCCGTCTGGACCGCTGGGAGCTGGAGCTGAACTCCGCCATCC  
CAGGCGATGCGCGGATACTCATCGCCGCGCGCCGTGACGGAAAGCTTACAAAACTGACACTGGGCTCTGCACTGGCTG  
CGCCGAGCGGCAGCAGTTTGTGATTGGCTAAAGGGAAACACGACCGGCAACCACCGCATCCGCGCGGCGGTGCCGGCA  
GACTGGGAGTGGAGACAAAACCGGAACCTGCGGAGTGTATGGCACGGCAATGACTATGCCGTCGCTGGCCACTGGG  
CGCGCACCTATTGTGTTGGCCGTCTACACCCGGGCGCCTAACAAGGATGACAAGCACAGCGAGGCCGTATCGCCGCTGCGG  
CTAGACTCGCGCTCGAGGGATTGGGCGTCAACGGGCGAGTAAGGCTCTGAAAATCATCTATTGGCCACCACCGCCGCCCTTG  
CGGGCGGCATGGATTACCAACCACTGTCACATTTAGGCTAGGAGTCTGCGCGGAGAGCCGTGTGACCGGTTTTCTGTAGAG  
CACTGACGATGGCGGCGGCGCTCTCTGCAATTGGCAAGGCGTGGCGCCAAGGATACCAATCTTGGCGCGCGGCGGTGTT  
ATGACGACTGGGGTGCAATTTGAGCCGCCCATTTAACCTTCGCCCTCACAGATACGCCATTCGCCTCAGATTTAGCGCCATGCA  
GACGAGCTTCCACTCGGCTTGACCTTGTCCAGGCCCTCATGCTGAACTGACGCAATCCCATCACCGCCTTGATCCAACCATT  
CGGAGCCTCCACGATCGACTTGCGCCGGCGGTAAGCTGCATCGCTTGTCCGTTTTCAATTTCCGCCAATCGCCGCCGTAT  
GCGGATGGGTCTTGGCATTGACCTTGGCATCTTACGTCCTCGCGGCCGAGGGCAACGATGACATCGCCGTGGTGATCGGC  
GACCTTTGCCAGAACAGCCTCACTACGGAATCCCGCATCCGCCAGCGTCTGGGCCGGCATTCTCCGGTGTGGCCTGAACT  
GCTGCCAGCATGCCAGCAGCGCCTGACTGTCCGCGGCGCAGTTGGTCAACTCCGCCGCCACGATGATCTGGTGCTCGGCAT  
CGACCGCTGTGTACCCGTTGTAGCTCTGCTCGGAGCCACCACCGCGTGTTCATGATCCGGCTGTCCGGATCGGTGAAGCTT  
TCCTGATCACGGTCATCCGGCACACCAAACCTCGCGTTTGTACGAGCCACCGCCCTGTCCGAGCCATCCGGATGGCGAGGCC  
GGCGGCCATCGTCTTCGCTGCGCCCCGGCCTGGTCCGCTTACGCTGGCGCGCTTCCAGGGGTGCGTTCGGGCTGAGGG  
CGAAATGACACCCTAAGCGTTAGCTCTGTGTCGTTGCACGATGTCAGCGACGGTATTCTTGCTGATACCGAGCTCGCGTGCGA  
TCCAGCGATAGCTGCGTCCCTCGGCCCTCATCGCAACCACCTTAGGCAAAAGTCGGTCTGATTTTGGTGCAGCTCCGGCCTGA  
CGACCAAGCCTCTTACCACGTGCCTTCGCAACAGCAAGGCCTGACTTGACCCGCTCGCTGATGAGATCCCGCTCAAACCTCCGC  
AATGCCGAAAGAAACGTCGCCAGCATTTCGTCCATACGGCGACGAAAGATCGAACGCCATTCATTTCATGGCTATCACGGAA  
ACCTTCCAGTTCTCCAGTTCACGTAGCGTATTGAGCAGATCGAGCGTCGAGCGCCCCACCGGGAAAGCTCAGTGACCAGGA  
TTGCATCAATTTGTCTGGACTGGGCAAGCGCCAGGACTTTCTTTGCTCGGCCCGGTGAGTTTAGTTCTGAACCTGTTTCC  
TTAAATATTCCCACCACGTCGTAGCCGGCACGGCCGGCGAAGGCTCGCAGATCAAATCCTGGCGTTCACAAGACTGATCCGC  
TGTTGAAACCCGGCAGTAAATGGCGGCACGATGTCCAATTGAACCCTCCTGGATTTTGTATCGGAACGCCCTGATTTATG  
GGCTGGCTGTTGTCCAAAACAGACTATACTTCAAAGGGACGAATTTGTATGTCACGACGCCATATTTACCGAACGGCAGC  
GAGCAGCGCTGTTGATCTGCCACGGACGAAGTGTGCTACTGAAGTTCTACACGCTGGGCGATGATGACCTGGAAAACAT  
TAGGCAGCGCCGAGACCGGAAAACAGGATTGGCTTTGCCCTGCAACTTTGTGCCTTACGATATCCGGGCCGTGCACTGGCT  
CCTGGTGAGATGATCCCGCGTGAAGTCTTTCCTTCGTGGTGCTCAGCTTGGAGTTCGGGCTGATGCGCTTCTCACTTATGCC  
ACACGGCGCAAACCCGTGAGCAGCACATGGACACGCTGCGCGAAATTTACGGCTACAAGACCTTACGGGCCGTGGTGCC  
CGTGATCTGCGGGAGTGGACTTTCGGCCAGGCCGAAGATGCCAGATCAAACGAGGATCTTGCTCATCGTTTTATTGTGCGGT  
GTCGGGAAACTTCCACCATTCTGCCCGCAGTATCGACAATCGAGCGCTTGTGCGCGGATGCTCTGGTCGCCGCTGAGCGGCG  
GATTGAAACGCGGATTGTGGAAAATTTAACAGCGGATGTTGCGGATCACCTGGACAAACTTCTGAGTGAAATGCTCGCCGGC  
AATATCAGTCGTTTCATCTGGCTTCGCAACTTCGAGGTTGGTAACAACCTCGGCTGCTGCTAACCCTTGTGCTGACAGGCTCGA  
ATTTCTGCGTACCCTGAATATCAATCATAGTGCTTTGGCCAGCATACTGCCATCGCATTGCCCGGCTGCGTGGCAGGGTGA  
ACGCTACTTACCGACGGTTTTCGTGACATCACTTCGGACCGCCGCTGGGCGATCCTTGCCGTCTGTGTTGTGGAGTGGGAA  
GCGGCGATTGCTGATGCCATAGTCGAAACCCATGACAGGATCGTAGGAAAAACCTGGCGGGAAGCGAAGCGCCAGCATGAC  
GAAACAATTTCCGGCTCTAAAGCCACACTCACGGATACGATCCGTACCTTACCGCGCTGGGAGCTTCGTTGCTTGAAGCCCG  
CAGTGACGGAACCCCGCTGGAGATGGCTGTGCGCCAGTTCGGTTGCATGGGACCGGCTCGCTCAACTGGTAGCGACAGGGAC  
TCAACTCAGCAACACGCTAGCCGATGAGCCTTTGCATATGTCGGGCGAGGATACCATCGCTTTCGTGCTTATGCGCCCCGAT  
GTTGCGCTGTCTGAAGCTCGAAGCCGCGCCGGTTCGCCGACCATTTGGTAGCAGCAGCTTGTGATCGGAGAGATGAAAGG

TGTTGCATCGCCAGAAAGGCGTTTTCTGCGGCCAGCTCCAAATGGAACCGTCATTTACGAGCTCAGGAAAAAGGAGATACC  
CGTCTTTGGGAAGTGGCGGTACTCTTTCACCTCCGGGATGCTTTTCGTTCCGGAGATGTCTGGCTCGCTCATTTCGCGCCGCTA  
TGGTGACCTCAAGCAGGTACTGGTGCCGATGATCGCGGCGCAGGAAAATGCAAACTGGCCGTGCCTTCCAACCCACAGGA  
TTGGCTGGCAGACAGAAAGGCGCGACTCACGATCGCTCTTAAGCGGCTGGCCCGGGCTGCCGTAACGGCACTATTCCGCA  
CGGTAGCATAGAAGATGGAACGTTGCGGATCGACAGGTTGACAGCAGACGTGCCGGATGGTGCCGAGGCACTCATACTGGA  
TCTGTATCGCCGAATGCCGTCCGTTCCGATTACCGACATGCTGCTTGAAGTTGATGCAGCCCTTGGTTTACAGATGCGTTTAC  
CCATCTGAGAACCGGGGCTCCATGTGCGGACCGGATCGGTCTGCTCAACGTCCTGCTCGCTGAAGGGCTCAATCTGGGCCTG  
CGTAAGATGGCGGAAGCTAGGGGTTTGGAGGGCCAATGGAACGAAAACGTACGCTAAGAAGTTAATTCATTGTTTAAATTGAA  
ATTTAGTTCTCTTAGTTCCCCCTTCAAATATCCTCCGGTAGCGTAAACGTATAATGCCCCAGCATAATTGATATGCCCGTGCATCA  
GTGGGGACAACCGGGCGATATCTCAACCCCGATTTCTTCTCCATTACTGCGTATCCAGCTCAGGGCTTCTGCATATAAAGTG  
TGTTCCACAGTACCACTGCGTTAGTGACCAGGCCCAGTGCCCCCAGCTGATCTTCTGACCTTCACGATAGCGCTTCTGATCT  
CACCGCGCTGCCCGTAGCAGATCGCCCTCGCCACAGCATGGCGGCCTTCCCCCGGTTTAGCTGCGTCAGGATCCGCCGACG  
ATAATCCTCATCATCAATATAATTAAGAAGGTACAGCGTCTTGTTGACGCGCCCCACTTCCATGATCGCTGTGCCAGCCCTGAT  
GGGCGCGAGCTTTTCAGCAAAGAGCGAATGAGTTCTGAAGCATGAATGGTGCCAGTTTCAGCGAACCGGCGGTTTCGCATC  
ATCTCATCCCACTGATCCTCGGCTTTCGACAGATCGGCACAACCACGTGCCAGTTCGTCCAGTGCACCGTAATTTGCCGATTTA  
TCCACTCGCCAGAATACCGCTTACCGGCATCGGCAAGCCGGGGAAAACGTGGTATCCAGCAGCCAGAAGAGGGCCAAAAA  
TAATGTCGCTGGTACCGGCTGTGTCTGTCATGATCTCAACCGGATTCAGCCCTGTCTGCTGCTCCAGAAGGCCTTCCAGCACA  
AAAATGGAATCTCGTAATGTGCCGGGGACAACGATGCCGTGGAATCCAGAGTACTGATCAGAGACGAAGTTGTACCAGGTGA  
TGCCACGTCCGGAACCAAATATTTTCTGTTAGGTCCTGAATTGACGGTTTTACCGGCGTGACAAAGCGCATGCCATCAGCT  
GAAGCCACTTCGCCACCACCCAGCGGCCAGCAAGCTCCAGTGTGGACTGAAAATCAACCAGGCGGGCATTGGCGCTGACC  
AGCGTTTTCTGCCCGGAGGTAATTCTGTTTTACCCAGCTAAGCCGGTGGCGCGTCAGCGCCGGTATATTGTGCTTTATCAGCGG  
TTCCAGCCCGATATTGCAGGCCTCTGCCATCAGGACCGCGCACAGGCTGATGTGCAGATCCTGTGCCCGGGCCCCGGATTCA  
CTGACATGCGTAAACTCACGTGTAAATCCCCTTCTGGCATCTATTTCAAGCAACAGTTCCTGCAATCTACTGGCGGGAGTAGC  
AGCCTTACCCGACTGTTGAGACGATGCAACGATGGTGGCTCCTCCAGTTTCTCCAGGCTGCTGATAGTCAGGGAAGGATGTT  
TACCGTCATGGCAAATATGAACCTCCGCATTTCTTCAAAGCGGGATGCGACGGTTTTCCAGGTTTCATCTAGCTGGACCGCC  
AACTGTTGCACGCCTTTATGTCCATCAGTGGGATGTCCAGCGCCCGGCAAACGGGGACCCGCTGAGCCTGCCATTCTTCCCC  
CTGCAACAGCTTCTCGCGGGGATTTCCCCAGCGATCGCTGTTTTTCGAGCCAGATGTCCCTTCGACGTAGTGCATCCTGAAGGC  
GCTCCAGCAGACAAAGCGAGTAACCGGCACGCTGTATCCGGCCCTCCGCATCGTATAACCAGGCGTTTCCAGGGGCCGGTAAT  
AATATGTTCAAGCGCATTGTCCAGGATGCGCTTTTTTCGAGCCGTTCAAGTTCGGTCAAGATAATGAATGGCGGACAACGTATGTT  
CTCCGGCTGGCGCTGCCTGGAATGCAGGTGCGCGAATACCGCCGGAAGAAAGCGCTTTACCCGCCGTAAGTCTCCACCAT  
TTCGTATGGAAATTGTTGTTCTGAGGCGGGCCAGCTCATTACCTTGTGACGGATTCTGCCAGCCTGCTTTTCGGTATGCT  
GTTGAATATGGTCTCCCTCAGTTCAGCATCGTCAGCCTGTTTCATCCAGCAACAATGAACATGCCCGCGCCAATATTAGCGCAGC  
ACGATCAAGATCTTTAAGCGTCTGAGCCGTTTTTCTGCCCGTTTTCTTCGCCGCACGAGTGATATCCAGTATCAGCATATCG  
AGCATCAACGGCCTCATCCAGCGCCGACGTCTCCTGCGCTTAAACGAATGCTGTGAGTACGGCCAGTTTTCTCTGCTGTGG  
CATTGCGCGATATATTTTACCGACGCCATGCCTGCGTAACGGGGCAAATTACGCAGTTGTATAGCAGGCAGACCGGTAAAATT  
CAGTCGGGAAAATTCCAGGTTTTCGACGCCGATATACCGCTCCAGCGCTTCGGTAAATGCCGGGGCCGCTGACGGTGACCGGT  
CCTTTTTTCAGTTGCTCCAGCGGTGAAGTACGCTGCCCTCAGGAATGTCCAGAAGCTCCGTCACGCGGGCGGTCTGCCAGC  
TGTCGGCAACGCGGCCAGTTTCTTCCACAGCCGCTGATTTGCCCGTTCGCGTATTTCACTGACGAGACGTACAAGTGTGGTT  
GCTCCGGGCAGCAGGACCTTATTCTGAAGCAGCCACGCGGTGGCAAATCAAACATAAGGCCGGGTCGCTCATTACTGAGCC  
ATGCGCGGGTGTACAGCAGGCGCTTCAGGCGGAAAGACCAGGGGAAATCGCCAAATTCATGGTAACCGTAATATTCTTAAAT  
CAGCGCAGTATGCTCTCTGAGGGTGGTAACCCGTTCTGCGTAGCGGGTAAGGACTTCCGGACGGCGAATATTAAGCTGCACC  
GCGACAAATTGCTGAACACCTGGCAGAACCCGGGTTAAGTCTGTGAGAAAGGTGCCAGAAAACGGGCGGTGGTGAGCTG  
AAGCGCAATTCCCAGCCGTTATGCCTTCCCCGCCGCTGGTTAATGAAGGCAAGATCCCGCTCATCAAGATGAAAATAGCGCG  
CCAGCTGCACGTCATTGGGTTCTGCAACATAGCGACCATAATTCAAGTTCCTGCTCAGTGGTCAGAAAATCGACGGGCATACCG  
GCCTCCCTGCCTGATGGTCATGAATTAACAATTTGCAACCGTCCGAAATATTATAAATTCTCGGACACACTAAAATGGTGTGT  
CTAGGTGTCTATAAATCGATTTTTTGTATAACAGACACCCACTGTCCGATATTTGATTTAGGATACATTTTTATGCGACTTTTT

GGTTACGCACGGGTATCAACAAGCCAGCAGTCCCTCGATATTCAGATCAAGGGGCTTAAAGAGGCGGGGGTGAAGCCAGT  
CGCATATTTACCGACAAAGCATCCGGCAGTTCTACCGACAGGAAAGGACTGGATCTGCTGCGAATGAAGGTGGAGGAAGGT  
GACGTCATCTGGTGAAGAACTCGACCGGCTTGGCCGCGACTGCCGATATGATCCAATGATAAAAGAATTCGACGCTC  
AGGGAGTCGCGTCCGATTCATAGACGACGGGATCAGCACCGACGGTGAATGGGGAAAATGGTTGTGACCATTCTTTCAG  
CTGTAGCCCAGGCCGAACGCAGGAGGATTCTGGAGCGTACGAACGAAGGACGGCAGGAGGCCAGGCTGAAAGGTATCCG  
GTTTGGCCGAAAGCGCATCATCGACAGAAATAGTGTACTGGCACTTCATCAGCAGGGAATGGTGCAACAGATATTGCCCGC  
CGGCTCAGTATTGCCCGTCCACTGTTTATAAAATTCTGGAAGATGAGAGCCGGTAAATCTGAGCAAATTTGAGGACGAAC  
ATGAGTGATGTAAAGGCATTCAACAATTGCATGAGTGTGTTCTGGCGACAGCATGAAGCCGAATTCTCTCGTTTCTGACATC  
GAAGACAGGTGATAGCGAAAAAGCAGCAGACCCGGAGAAGACGAAGGTGATTATCGTGACGTTGCCGAAACGACACCTG  
TACTGGAAGCCGCTAACCTGCAGCAGGATCTACGCCGAGCTGGCATCGAGCCGTGGGCATGGTTCGTTAATAACAGCCTGGC  
AGCTGCTCAACCGTCTTCGCTTTCCTGAAGATCAGGGCGAACCCGCGAGCTGCCTCTCATCTCTGATGTGGAAGAGCAGTATG  
CAAAGCGTATTGCATTAACAGCGCTACAGAGCGAAGAGCCGTTGGTATTGACCTGCTGGAAGAAATGGCGAAGTAATAATG  
AAGGGGGCAAATGCCCCCTTCGCTTTTATTTCAGTCTTTTACCTGAATCATCAACGACTTTTTTACCCTCTTCCTTGGTGAAAG  
CCGCTTTCTGGGCATCTGGAAGGATATCGAGAACAACCTCTGAAGGACGGCAAAGTTTAGTTCCCAGTGCCGTCCTACTACGAT  
CGGACGGTTGATCAGAATCGGATGCTGTAGCATAAAGTCGATGAGCTGGTCGTCAGTAAATTTATCTTCTGCAAGACCCAGTT  
CCTCATAACGGCTCGACGTTCTTACGCAGCAAAGCCCGGACGGAAATGCCCATATCCGCAATGAGTTTGGAGCAGCTCATCGCGT  
GAAGGTGGAGTCTCAAGGTAAAGAATAACGGTTCGGCTCGATACCGCTGTTGCGGATCATCTCCAGCGTATTACCGGACGTGC  
CGCAGGCTGGGTTGTGATAAATGGTATGTTGCTCATATCAGTATCTCATTACAAAGTGAAAGAGAGACGTAGCGCCAGCGCG  
GCCAGCGTTACAAACAGCACAGGCAGAGTCATGACGATCCCGGTGCGGAAATAGTATCCCCATGTGATGGTCATGTTCTTCTG  
TGAAAGGACATGCAGCCAGAGCAACGTTGCCAGGCTACCAATAGGTGTAATTTTCGGTCCAAGATCGCAGCCAATCACGTTG  
GCAAAAATCATCGCTCTTTGATAACGCCTGTTGCAGTGCTGCCATCAATAGAGAGAGCACCAACCAGCACGGTAGGCATATT  
GTTTCATGATGGAAGAGAGGAAAGCCGTCAGGAAGCCAGTACCAAACGTCGCGGCCCAAAGTCTTTTATCTGCCAGCACGTT  
CAACACACCGGAGAGGTATTCTGTTAGTCCGGCATTACGCAGACCATAGACCACCAGATACATTCCCAGAGAGAATATGACGA  
TCTGCCATGGCGCACCGCAAGCACTTTGCCAGTGTTAATGGCATGGCCTCGCTTCGCCACCGCAAACAGAATGACAGCCCC  
TACAGCAGCAATCGCACTGACCGGGATACCAACGGCTCAAGGACGAAAAAGCCAACCAGAAGAAGGATCAACACTATCCA  
GCCGGTTCTGAAGGTTGCCAGATCTTTAATCGCTTTTGGCCGGTGTTCAGGAGAGCCAGGTCGTAAGTTGGCGGAATATCTT  
TGCGGAAGAACAGATGCAGCATACCAGCGTGGCGATAATGGCTGCGATATCCACCGGCACCATTACCGACGCATACTCAGT  
GAAACCCAGCCCAAAGAAGTCTGCAGAAACGATGTTAACCAGGTTGGACACGATAAGCGGCAGACTGGCCGTATCGGCAAT  
AAACCCGGCGGCCATGACAAATGCCAGCGTAGTGCCTTTGCTGAAACCTAATGCAAGCAGCATGGCGATAACAATTGGCGTC  
AGAATCAATGCCGCACCATCGTTGGCAAACAGTGCCGCCACCGCTGCGCCGAGCAAACGATATAGGTAAACAGCAAACGCC  
CGCGACCGTTACCCCAACGTGAAACGTGCAGCGCCGCCATTGAAAAAGCCGATTCATCGAGCAGAAGGCTGATAATAAT  
CACGGCAATAAAGGTCGCCGTCGATTCCAGACAATATTCCACACTACAGGGATATCACCAAAATGGACTACGCCAGAGATCA  
GCGCCAGTACCGCGCCCAGCGTCGCACTCCAGCCGATCCCTAATCCCTTCGTTGCCAGATAACCAAAACGATGGTCAGGAC  
AAAAATAGCGCCTGCCAGTAACATAAATCCTCCAGACAGGACGGCTTTGCCGCCCTGTATATACAAAAAAATTAACAACCA  
GCTCTCTGAGTTTCTCGATGCCAGTGGGCTCTGCAGCCATTACCGGTAACGCTATGCGGCTTGCATGCTGGTTTTTCACAA  
CCTCGATTTGAGGACGCTCTTGTAGGGCGCGCTGGCAAAGCAGCGGCGATTGCGTCTGTGCAATCGAAAGGCTGTTATTGAT  
AATCCAGCCCCAGGGATGAATCCCCGCACGTTCAAGATCGGACTGCAGGTTTGGCGTTCCAGTACAGGTGTGGTTTTAGGC  
AGAGTGACCAGCAAACCTTTGGTACGTTCTGGTCTGAAGCTGCATCATCGGAGTGGTAAAATGACCTTTATCCCCATCTTC  
CTGGCAATCTCACGGTGATAAGCCCCGGTAGCATCAAGCAGTAATAGCGTATGCCCGGTAGGTGCCGTATCCATGACCACAAA  
CCGTTTGGCAGTTACGAATTACGCGTGAAAACGCCTGGAACACCGCAATCTCTTCTGTGCAAGGAGAACGTAAATCCTCTT  
CGAGCAGCCGTTTCCCAGCCTCATCCAGATCCCTGCCTTTCGTCTCAAGAACATGCTGACGATAGCGTTTTCAGTTTCATCGTGAG  
GGTTGATTCGGCTGACCTGCAGATTTTGGAGGCTGCCATTGAGCGTTGTAAGTACTGAGATGTGCAGCAGGATCTGAGGTGGTGAG  
ATGCACATCAAACCCCTTATCCGCCAGACTGACGGCGATAGCCGAGCCATTGTGGTTTTGCCACACCACCTTTGCCCATCA  
GCATAATCAAACCGTGTTCCTGCGGGCGATATCATCAACCAGGACAGACAACGACATATTCTCTGGCTTGTCTGTGGGCTTT  
GTTTCAGGAAGCGATGTTATCTCAGCGTGTTCGTTGAGCAGGCCTTTCAATGCGGATACACCAACCATGTTTCAGCGGCTGCAG  
GTATAAGTTGTCTGTCGGCAAATCAGATAACCCGGCAGGAAGATTTGCCAGCGCTCTTGCTCCCGTTGCCATATTGCAGCGG

CCAGTGCATCACGTTCTGCTTCGCTCGCAGGCAGGACACCGTTAATGACTAAATACTGATTTTTAAGGCCAATAGCTGATAATT  
CGTCATGAGTACGAGCGACTTCCTGCAGTGTTGATTTTTGCAATCGCGCGACCAGCACAAAGGCGAGTTCGTTTCAGGATCGGA  
TAATGCCTCAACCGCATGAGCATATTGCTCGCGTTGTTTTCCAGCCCAGCCATTGGACCAAGACAGGAAGCACCATCCGGGT  
TACTTTCGATGAAGCTGCTCCAGGCTCCGGGAAGCTGAAGAAGGCGAATAGTGTGGCCAGTTGGGGCAGTATCAAAAATGA  
TGTGATCAAAGCGGGTCAGCAGAGAAGCGTCAGTCAGTAAGCCAGTAAACTCGTCGAATGCAGCGATCTCTGTCTGACAAGC  
TCCTGAAAGCTGTTCACTGATGCTGTTAACAACGTCATCAGGCAAAAGACCTTTAATAGGGTCAACGATTCTGGCGCGGTATT  
GCTGGGCGGGTCCTGCGGGTCAATCTCCAGAGCCGAAAGACCAGACACAGCAGTCACGGGCTGGATAGTGTACCGATAG  
TCTGATCGAATACCTGACCGACGTTAGAAGCCGGGTCGGTACTGACAAGCAGAACACGCTTTCCAGTTCAGCCAGACGTAT  
AGCCGTTGCGCAGGAAATCGAAGTTTTACCTACACCTCCCTTACCGGTGAAAACAGGTAAGACGGGATATTCTTTAAGAATT  
TCATATGTCCTCCTGACATACTCAACAACAGGAAGTTTTACCACCACAGCAACTGGTGGAAGCTAAACCCACCTTTTCCAGCG  
GTATACCAAACCAGCGAGCCAGTTCAGCGCGTTTTGGGTATCGCCCAGCCATCACCGTTTACCATCAAGCAACAGCAGCGG  
AAGCCCTTCAGCTCCAGAAGCCTCAAGGAATGCTTTCGTTTTTCGTTCTCAACGAAGCTCATAGGCTGCTGCGCCAGGTTAT  
AACGTTTCGATCTGAACCCACGCCCCTTCAGCCATTGCACATCAGCAGAAAATTGACCAAAACCTGATCGACATCTGAACCA  
CAAACGCCGGTACTGCAGCACATCGCCGGATCAAACACCGTTAACATTTTCATCTTTAACACCTCACATTTCGTA AAAACATATAT  
GTACAGGCAAAATTTTAGATACAAACAGCCTTACCGCTGCCAGAGCAGTTGGCCGATGCCAGCTTACGGGCGATGGCCTGT  
ACGTCGTCCTGTTGACTTAACCAGGCCTGCTCAATCACCAGGGCAGCCAGGAAGGAATATGCGGGGATAAGCGATAATGAA  
CCCATTTCCCCTGCTTGCATCCAGCAACAGGCCACTTTCCCGAAGCATCGCCAGATGGCGGGAGGTCTTGGGTTGTGATTG  
TTCCAGCGCTGTGCAGAGATCGCATAACGACAGCTCCCCATCTCCCTGAGCAGTAGCACGATACCCAGGCGGGTTTCATCAG  
ATAGTATTTTGAAGTTGTAGGGATGCAATTTCTGGCATTATGACTCCTGCTATGAATGGGTATTGTCTCTCCACCAAACAA  
GAAGTCAAATCATATGTGTTTTCTCGCATGTGAGTGCAGGTGTCATGCGGTTGAAAACGACCTGATGTGCGATCGTTA  
CGTTAGTTGGGTAGGTAAAAAGTCATTTGAGGCTAAAACATTGCTTAGTGCGGGCTTTCAGTTCATAGAGAAGAATGAATAA  
TATCAATTATAACAATTGGTTATTTCTTAGCGTACGTTTTCGTTCCATTGGCCCTCAGACCCAGCTACAAACACGCATGATTAC  
TGGCAGCTCTCACGCCTTGCCCGCTGGCATGTTGAAAGCGAAGCCATGAACCAGGCATTGGCAATTGTGGTGGCCGCGCAG  
GGTAAACTGCCGATGTCACGCGTCTGGGGGATGGGCACGTCAGCATCGAGCGATGGTCAGTTTTTCCCGACAGCGCGGCAT  
GGCGAAGCCATGAACATGGTCAATGCCAATATGGTTCTGTTCCCGCCTCAAAGCGTATACTCACGTAAGCGACCAGTTTCGC  
GCCATTCGCTTGTGAGTCGATCCCGGCGACCGTGAGCGAGGCACCGTATATTCTCGATGGACTACTGATGAACGAGGTCGGTC  
GCCATGTTTCGGAACAGTATGCCGATACAGCAGGATTCACCGACCATTTGTTTCGGAGCCAGTAGCCTGCTCGGCTACAATCTC  
GTTCTGCGAATCAGGGATCTGCCATCGAAGCGGTTGTACGTATTTAATCCCGATACGACCCCGAGGGAGTTACGCAAGTTGGT  
AGGTGGAAGCCCGGGAGGATCTTATCGTTGCGAACTGGCCTGATTTTTCCGTTGTGCCGCGACGATGACCGCTGGCAA  
ATCAGGCCAGCCAACTCCTGCGCAAGCTCGTTCTTACCCACGACAAAACAACCTTGCAGTTGCGCTTCGTGAAGTTGGTC  
GTATTGAACGGACCCTTTTCATTATTGAGTGGATCCTGGATACGGACATGCAGCGGCGTGTCTCAGATCGGTCTTAACAAGGGA  
GAGGCCACCATGCGCTCAAAAATGCGCTCCGTATCGGGAGGCAGGGGAAATTCGCGATCGCACGACAGAGGGGCAGCA  
CTACCGAATCGCTGGGCTCAATTTATTGACTGCGGTGATCATTTACTGGAATACCGTCCATCTTGGTCATGCCGTCACGGAGCG  
GCGGAACGAAGGTTGGATGTTCCCCCTGAATTTCTTCCCCACATATCCCCATTGGGCTGGGCGCACATTCTACTGACTGGCG  
AATATCTTTGGCCCAAGGAACCGAAAGCTTAGGGTGTCAATTCGCCCTCAGCCGGAACCGACCCCTTCCAGGCGCGCCTTTG  
CCGCCTGGATCGCCTCCAGGCGTTCTCGCGGCGAGAAATCTCGGCAGGAATGTCCAGCTCCGGCTCGTTACGCTCCTGGTC  
GTCGGTAGCCTTGGCGCGATCAAGCAGCGCCTTGATCTCGCAATGCAATTCGTCTCGGCCGGCTTCATGCGCTTATAGCTCAT  
CGCCTTGTGGCGGCTGGCGTTGGCTTTTACCTTGGTGCCGTGACCGCGATCGTGCCAAGCTTACCAGCCACATTTCGCGC  
GCCAGTTGCACCACCTGAACGAACAAATTCTCAAGCTCGGTGAGGTGTAGGGCACGGAAGTCACTCAGCGTGCAGTGGGCC  
GGGAAGTTTCCAGCGGCCAGCACACGCAACGCGACATCCTCGTACAGCTTCTGGCTAGTTTGCGCGAAGAGAAGACGCCG  
CTCGCGTAACCATAGATCAGCACTTTGACCATCATCGCCGGATGAAACGGCTGATTGCCCGGACCACCGCCGCATACCGGGC  
GTGGAATGCGCTCAAGTCCAGCGTATCGACAGTCTCGCTGATGAAGTAGGCAAGATGCCCTTTCAGGTAGCCACTCTCCAGA  
GAAGGGGGCAGCAGATAGGATTGGTCGGGTCGGTAAGGAAGGTAAGTGGCAGCCATCCCCGTATCGTCTCGATCTTCCGCC  
GATTTGGCTTCTGCCGCGCAGGCTCCTAGGCCACCGTAGCTAAACATACGAGAAAAACCGCTTCTTGAGCGCTCTCTGAGAC  
CACCTTGCCGACAACGCAGAAACGGTTGCGGAAAAATCGGCGTTTTCCGGCGTACGCCACCCGACCTGGACGAACCTATTGCG  
GACCTGGAACCTGGAGTAGCGGAATCCCCGGGGTTTTAGCGTTCGCGCCACAGCGCCTCAGATAGATGCGGTAGCCTTTGGC

GGGTCGTCATGCCGCGGACCACCCCCCAAAAAATCCACAATGCGGAATGGCGGAATTTTCTGGGGTCCCGCTTACCCCC  
CCTTCAGGCGAGTAGCCAACCTGAACGGATGGTTCCACCGCAAAGGCGGGCAGGGCGGCTGTCGTAAATGCTGCGGCCAG  
AAGCCAGTTGCTAAGTTTTTTCATTACAGGCTCCCGTTACACACTGCATTTTATATTCAGGGTCAAATAAATTTCTTTGATTT  
TCCGCTTTTCCATATGCACCACAACGTCAATGGTGGAGTAGAGCATTTCGCATAATATCGCTCATATCGAGCATAACGGCCGATAG  
GGGTCGCTTGATAAGCAGCCCAATACGGTTAAAGGCATCGCGCGCAGAGTTAGCGTGC GTTGACATAACACCGCCTGGATG  
GCCGGTATTAAGTGCTTTAAGATAATCCCACGCAGCATCATCCCTAAGCTCAGTCATGATGATACGGCCCGGTGTCAGACGCAT  
ACAGGCTCGCAGGGCATCAGTGGCGCTGACGCGGCCGATCTTTCCTGCATCGCCGTACATCATATAAACGGCTTCTACAACGT  
GATCGACCGTGACTTCGTGAACGTCTCTAAAATAATTACACGCTCGTCTTTATGTAGCGATTTAACAGCGCGCGCGTGAGTA  
CCGTTTTCCCGACCCGGTTTTACCCGCAGATCACGATAGTGC GTTTCTTCTCAACGGCGGTTTTGCAGGAATGCGGGCCATTTT  
TCGCTGCTGTGCAGCTCTTTAAGGAAAAATCATCATCCGTTAGGCTTTGCTTGCTGCCGGTAATCTTCCGGCAGTCACTGAA  
AATCCCCTCGCGGGTCAGCTGCTCCAGATTTTTATCGGCCGCCAAATCCTTACGAAACGCTACGGCCGTTGTACCGTCAATCAC  
CGCAGGGGGCAGACAGATAACGCCCTGATCCCGCCAGGCAGGATCACGTCATTAATGGCCTGCATGGTCAGCTTGTGCTG  
CTCACCAACGATTTAGCAAGGTTCTAATAAAAATCTGCCGTAATTGCCGCTTCTGCACAACCCTGCGGCCGCTGAACGTATCA  
CAGATAACTTCTGAAAGCAGTTAATGCGAATTTCAAAAACAGTAGGATCTTCTAAATACTCGCGCAGTGGGCCAAGTTGATA  
GAAAGCTGCATCAGTCATGATTACTCCTGAAGAAAAGCGGGCGCTAAGCGCCCACTTTTTAGTTGTCTGCGAGCGTATAAAC  
GCCGCTGAAATCGAGGTCGCGGGCAACAAAATGCTCACCGCATCACCTGCTGATCGTAGAGGGTAGGGGGGATAGACAT  
GTAAGAGCGGAGTGCTTCAGACGCCAGCTGCTCACCGCTGTTTTCTGTGCTGTTGTAAGTATTACTCTGCGTCTGGTT  
AACCAGCGCCGTTAAGGTGTCAGAGAACAACGAAATCATGATCGCACCCAGCAGACGCTCCACATATGGGTATCCACCTGG  
CCCGAATCCCGCGCTGCCGAGTGAGTTCGTTCCGGCACTGTCAATATAACGATTGTCCCGTCCCTGGTCATTGCGGATACG  
CTCCAGAGAACAACACGCGCGCCTGGCCGCTTTTGATACCACCGTAATCTGCCGTCACCCATGAGCCTTTATCAATCA  
GCCTAACGAGTCCATCAGCTGAGTAAACGTCCTGTGAAACCCGGCAGGAAACCTGACCCGGAACAGTGGTATCCAGCTCGGT  
GCCGGTACCACAGGGGATCATTTTGCCTTCGGAACAGTCAGGCTGGGATTAGCCATGACTCCAGCGCGGCTAGCCTTCAGC  
CTTGCAAGGAGTCAGGTTTTAGCGAGTGCTGAACTACCTTCGCTTGTTCGTTGTCCTGGGGCTGCACTCCGGGACTATTGCT  
TG TAGCCGCTGATTAGTCTGGGCCAGCTCGCCGCCAGACGACGCTGCATAGCCAGTTCTTCAGGCGAAGGTTCTTTACGCT  
TATTAGAGGTACGCGCGCGGTATTGCTGCTGCCCGCATCTGCATCTGCCTGTGCGGCAGCCTGCACAGCACGGGCATCAGT  
GGCGCTATTCTGCGCAGTTGCAGGTTTATAACATCAGGATCGCTGTTAAAGCTGTAGTTTGGCAGTGTATTGGCCTGTTGCGC  
TTTACCACCGTCTTTATCAGCTTCAGCTTTAGCCGGGGTGCGAATTTTACCATGACCGTAATCCCGATGAATACCAAAGCAAG  
CAGCGCCATCAGTATGACAAAGGCTTTCATAACAGGAGCCGAACGGCGGTTACTGCCTTTAAATCCGCCACGCTCGCTTTCGA  
ATTCACCGTCTCCGGTGTTTTATCGAGTTCCTGATCTACATCGACACTTTTACGGGCCATCAGTTATCCTCCCAATTTGAACC  
CTGCGCACATCCGGGGAAGCCGTACCGGTTGCTACCGCACCGGCGCCCGGCGGAAATTATTATTACGAACGCCAACGACTT  
TATCGCCCAGACGAATACGCCACTTTTAGCGACGTTTTCCACCTCGATGATGTTGCGGTTCTCACCCACAACATGAGAGTTAG  
GCAGCGTTTCTTTGCCACTGGCCGAAATCATGTAGACCTGCGGTAACTCCGCATTGGCCGGAACCTCAAACCGGGTAAAGCG  
GTAGTTATCCAGACGTGAACCGGCTGGATGCTGCGCATTTACAGGCTGTTGCTCATTACGTAAGTACTGATAGTTCTTCGCCCCGC  
AAAAGCCGTCTGCTTCAGCTTCTGCGTAATGCGTTTTTTATCAGCCGCGCTTTTGGCTTTTTCTGCTGCTCAAACGGATATTC  
ATAGGTCAGCTGAAGAACGGCCTGGCGCACAGCCACGGCGTTTTCAATAAAGGATTTTGATACCGTACCGTCTGCATTTTTCT  
TCGTTTTCTCACCGATGAAATGGAGGACGATGTTATAGGTGCGCTTATCGGTGACGATACCCAGGTTGGTATCACTCATGGCCT  
GTTTTCGGCTTCACAAAAAATGGTTCATTTTGTGCGCAAACGTCCAGCTTTCAGAATCGCCAAAAGCATGAGTGATATAGGTT  
TCGTCAGGCGCGACAACAATGTGGGTAGCCACACCGGCGATAGCGTCAATTTTGACCACATTAACAGGGTTATAAACAACGC  
TTTTAATGCGATAGTCATAAGGAGAATTGCGGCCAACCTCAAGCGCCATAACGTTAGTGCCGCGCCTCCAGGACTGACAA  
AACGACTGCTGAAAGAAGTAGTTTTTTCATGGGGCAGCCCTCAGTTAACTTCAGGGTTGACGCGATAACTCGTCACGCGGAA  
ACCCAGCGGGTTGACATAACGCTGCTCAGCATTATCGCCAGCGATTTATATTCATAACCCATAATGGCAATCCAGCGCTGCGG  
CTGATCATCAACGGGATTGCTGCGCACGCGGCGAACCGTAGTAAAGCGTATCGTTGCTACGCCGTGCGGTTTATCGAGGATCA  
CAGAGTTAATCTTCACGCGGGTCGTTTCACTGTCGCCGAGAACCTTATCAAGACCGTTGCGGCCCTTGAACCTGCTCTGGTAA  
GACTCTGCCACGTTGCGCGTGGACATTAAGCCAACGGCCGTATAGTCGACCTGAACTGAATAGAAGTCATAGCTCTCACGGTG  
AATGACATATTGTGTCAGCCAGAATTATCAATTTGTCACCATAAGAGGTCTGGTCGCGGGTCAGCTTGACCTGCTGTACTTC  
GTGAGTGCCCTCGTTGAGCGTTAGCAGATGTGCGGGGATTGGCTGGCTGTAAGTATGCACCACGTAACCAACTAAAGAGAGT

GCAAAAACAGTTACCACCGCTGAACCGGTGGCAACCATCCAGGCGGTACGCCGGGACTTCAGCACTTCATCCATCAGATCAA  
CTTCAAGCCCTTTACGGCTTTTCGTTGAACTCTTTAATGGCTTCACGTGTAAGCCCTGTTTTTTTATTAGCTTTCATTTGCACCAC  
CTTGCGTATCAACCGGGATTGTTTTGTTTACTGGAACGGTGTGCTCCAGTCCGGCTCCGGTGGCGGTTTATGCCCCGCTGGAA  
CAGGCGCTAATCAGAAGAACTCCCATAAGCAATAAGCTGCGCATTACGGCATCCATTATCGGTTGTTGAACGTACTAATTATAAT  
AAGTCGTGCGAAATTGCAATTTCAACGACTTTTGTTTAATTTTATGCAGCCTTCTTCCCGCGACTGCCCTTGCTTACCACTTA  
AATTAGAACCACTGCTTCTCCGCTGTTGCTGCCACTTCTCCACCTGCCGATTGCTGGCCGCCGCACTGTTACCGCCTCTGA  
ACGCATTACCGCCAAACATGCCGTGGCTGCCCATATTGCCAAGCGCCTGCATGGAAGAACCCGTAGAGCGTGGCGGCTCAGC  
AACTCCGGCGCTGATACCGCTACCCAGCTGGCGGCAATTTGCGGAATCTGGAACAGAACGAAAACGGAATGACCGTCAG  
TAATAAGGCGGAGATAGAACCAGTGATTGATGAGTAAGCGGCATCAGAGTTCATCGAGGACAGGAGTTGTGCAACATCTGC  
ATGATGAAACCAAACACGAGCGCAAGAATGACGACGACAAGGCCATAGTTAATGACCGACGCCAGCCAGCGAGCAAAGATG  
TTTTTGTGCTCCCCACAGCAGGCAGAAGATTGCAATCGGGCCAAAACAAAGCGTAACGGCCAGAAGGATCTTAGCCATGA  
TCACAAAGCCCGCACCGAGGCCGCCAGCACAACGGTAGCAATCATCATAATGCCGCAATGGCATAACGCGGCCAGGCCGCT  
CGATGAAAACACGTCTGCGGCTTCCCATGCGGTGTTGACGATCTTGATACCTTTTTCAATACCGCTATCAATAATCGCCGGTAC  
GCCACTTGACCGACTTTATTAGGGGACAGACAGTATCCCGGCAAAATCATCCGGCAGGTGAAGCGCCACGTTGACCAGTTCC  
TGTTGATACCAGCCGCCCGCTTGC AAAGCTCAGGATAAGGGCTATGGAAGATACTCTTTAATCAGCGAACTCAGGCTGTC  
GCCCCCCCCGATTAAACGCTGAGTACATCCCCTGAACCATCAGCTTGATTGTCAGACAGGTGGCAATCAGAGGCGTTACAT  
CAGAGATAATGGTGGCAACATTGGCGCTCACCATTGACGTAATCGCCCCGTCTACTTTTTGCGAAAATGTCTGCGACTAGGGTG  
AATGCCATATTGCCTCCTTACTCCTAAATTTTCGGTGAATTGATTCGCCGTCTTTTTTGCCGAACACAACAGCTGACGATCGG  
CTTCGCGCGCGTTTTTGAATCAGTTTTCTGAAGTTCATCCCGCTTTCTTGCATTCTGAATTGTTGCCTTGGCGCTTTTCTC  
ATGTTTTTGTACTACTCCACGTATGCGAGGCATCGCAGGCCACTAGGAGGAAAGGGATAACAAGCAGTAGTTTTTTCATAA  
TTACCTCAGTTAATTGAAGGTGACGCGGTAACGTCCCCGCCGTTCCAAAACAAAATTGTGGGTGGCACGTTCTTTCTGCGC  
ACGTAATAGCTTGTCTGTGACTGCTGCAACATGTTTCATCAGATTCAGCTTCGCCTGCTCACCTGAATAGCACCTGTGACGT  
CTGGATACGGCCCTGTAAGTCAGCAATCGATTCAGGTCTGGAGTCGTTTTAATCTGCTCCGTCAGCTCCTGCATATCGGTTAG  
TTCCTGCATCTGGTTGTTGTAGGCTTTTTCTGCCATAACACGGTCATAAGCGCCTTTTTTTCAGCCAGCTTTTTGTTTCATGTAGGTA  
ATTGCTTCGCTGGGCGTCATGTCGTCAACTTCCGCATTAACACTGGCCATCATGCTGTTAACTGAAGGCGTGACGGAAGA  
GGAGTTCATGGCGTCTGTAGATCTCCTTCCAGTTGTCCGGCAAATTATTTGCCAGCGTGTGGTAGACGTCCCAGCAGAT  
CGCCAGGTTGGTTGCTTTGCCATCGACTCATAATATTTTTCTGCGTTTGCAGCTGGCTTTTTAAGCTGCTCCAGCTGCTGCG  
CCATTTGCTGAAGCTGCTCGACCTGTTTAGCCAGCTCAGTAGGGTTGGTCACGATGATGCCTGCGGAAGCGCTTTGCGCGCC  
TCCAGTATCAGGCCGGTGGTCAGCAATACTGCCGTCAGTGTTTTTTTCATGGTGTTTGCTCGTTGTTAAGCCGTCAGGCG  
CCAGTATTCTTTGAGCCATACTTCAGGGTCATTACCGAGCCGTTCAACCAGCTCATGCGCAATTCGGCGTTTTGTGGTTACC  
GGACAACACGCTAAGAACGTTGTCCATTGTCTTAATATCTGCATCAATATCGTCGCTGTTGCGAGGGTAGAGATTGAAAGA  
CAATCGCAGACTGTTGCCCTTGTTTAACCAGGAACTGTCTGGAGTGTTCGGTAATCGACATCAGCGCGTCGTTTCAGCATCA  
GTAAGGAAGGCATAATCCTCTCGGATAGCTTCCGGATCGCGCAGGCAGATTTTTGTGACGGTCTGCGACATGATCGTGCGGC  
CAATACGGCTGGACAGCGCATGTTCCGGCTCCTGCGTGGCAAACACATAGATAGCGTCTTTCTTACGGTCAGTTTTGATACCA  
CGCTTAACTTCACGCTCGATAACCGGATCGTCAAGGTAGGCGTGGAACCTCGTCAAAGCACTGAATGACGCGGCGTTTTGCCGT  
CGATGGAGTCACGTACCCGGTACAGAAGGTACATCATGAGCGGAGTACGGGCCGGGCTGGATACTTCTCTTTGGCTGCGAT  
AACTCGGATAAATCGAAGCCAAAAATATCATTGCGGCTGAGATCCAGGCTGTCTTTATCATTGTCAAACAGCCAGCCATACTG  
GCCTTCGCGCGTCCATTCGCGCAGCAGCCCTTTCAGTGATACGCCATTTTCCACAACCTTCATTACGTACCCGTCCAGGATAGT  
AACGGTGCGCGCCTCGCGTGGAAATAAGTGAGCCTTCCCCATAACCGCATCAACGCCTTCAGCCAGTTCGGTAGCCATCGTTG  
CGCTGATAGGCCGTTATTGGTGGTTTCCACACAATGCGGAACAGGTTTTTAATGAGGGCAATATTGCGTTGGTGGTTCA  
ATCTGAAGCGGGGCAAACCCGGACGGCATAACCCTGTTGCAGAACTTTATAGTAGCCACCAACGCTTCGAATGAACGGCTCCA  
TACCGCGGTCACGGTCATAAACA AAAAGCCGCGGTTGTACTTCATTGACTGCGCCAGCAGGAAGTTAAGCAGCGTGTTTT  
ACCTTCCCCCGACATAACCGTTATTAACGCATGGCCAGCGGGGCTTTACCGTAGGAAAGTTCTTCAAGCGGGGTACATGGA  
AATTAATAATAGAGTGGCGTACCGCTGATCGTGCGGAACATGGTCAGCGCTGGCCCCACGGGTTATTGTGAGGCTTGCCACG  
CATAAAATTGTGGAACGGGCTGAAGTGCAGGAAGTTCATGAGTTTATCGGAACCGGGCGCGGCCCATTTCTGGTTGCCA  
GGCAGTCTCGCATAATATGCAGCCTCAGAGGCCAGGCTGAGAGTCCCGCCAACACGCCACAGCCGTTAGCATAACCTTCA

CACGACGCGCTTTGCGCTGTACCGCGTTTTGGTCATTATCCCAGACATGCACGGTTCATGATGGTAGCCCATCACGAACTCTC  
TGGACGTCAGCATATCGAGCGCGGTACCAAGCTGTGCCAGCTGGCTTTGCGCACGGTCGCGCGTTTTCTGCAAAGATTTTTTC  
CTGATGCGTCAGAAACGTTTTAGCTGAAGATTAGAGAGGCAAGAAAACTCTGCGTCAGAAGGTATTCAAAATCGGCTTCT  
TTAAGCATGTTAAGCTGGCCTGGCTCTGTATCTTCTTCGTATTACGAAATTCAATGCCGGTGGTATAGAAGTTGTGATCTACCG  
TTCTGATCTGGACAACATCCCCCACAGTGAGCTAACAGGGCGGTTGTCCATGATGTACTCACGGATACGATCACGGCAAACA  
GGCACGATGGCCATTCCATATTTGCGAGGAAATAAAGGAACTCCAGCGCTTTTGAATAAGCGTGAGCCTGCGAAGGTTTCAG  
GCTCGTTGCGTTTGATAACAATGGCTTCGTCAAAAATGTCTGATTCATCGACTTCAGCAAGTTCCTCACGTTCTTTTTTATCAGG  
CGCAGGAATTTCAACACCGCGTTTTGTACGATAATAGATACCCAAGTCTGAATGCCATACGGCTTCATTGCTTCCAGGATTTG  
TTCAGAAATATCTTCCAGACCTTCAAGCGCCTCATTCTGCATTGCTGAATTCGTCACGAGTCGGCTTTTCAAATTTTCGCCAG  
AAACTTCTGTGTTTTATCCCCTACCTGTTTGTAATAACGGTCAGATAAAGGTCATTAATCAGCTGCTTGAATCACCGTGCAGC  
TTACGGTTATATTGATCAACATAAGCAGGGAAAAAATGGTCATACTACCATCCGGGTACTCTTTAGCCTCATGGTGATATTCAT  
GCGTCCACAGCTCTACATGGTCTGTTCCGAAGCTCTTGACCAGCGTATTAAGGCTTTTATGCCAGGTGACCAGTTCCCGATCTG  
ATGCGCAGTCATGTGTGCGGCCATCCAGCTTGAAAAAAGCCATCAGATCGCCGTTTTCCATCGAAATCACGTAATCATTGAGG  
TGATAAGAATAGGGCAAATACTTTTTATTTACTGATGGCTCCTTACGGTAGGCATCAATTTTTTTGGCTTCGTAGCGGTGGCA  
GCTCTCATTATTTAAACCTTACGTTTGTAGTCAACAGAGGAATAAGACGATCCTCCCACTGCTTAAACGGAGAATCAAACC  
AATTACTGAATTTGGTTTTCAACCACAGGCCATAATTCGAAACATGCGGTCGTATATTTGTTAATGCAGCTGAAGGAATCC  
ACAAAAAGACGAACACCAGGATCGCCACATATGAATAATCATAAAAAGCGAGGCAGAAATCATGAATATCATCATAGCTACAT  
TACGTGGTACACCCAGCGCGAGGTAAGCGAGTCGCACCTTTGAAAAGCGGTCTTTTCCCGTCAACGAACATCTTTGTAGT  
CCTCACTTTGGGGGACAAAAGTCCCCCTTTTCGCGTTGTTACGCTTCTTACGCCCCGTCAGGGAAACCAGAAATGATGCAGA  
ACCAATACCAATCAGCGAGATTACGATACGAGGAATAAAGCTGGCTGGGATTACGTGAAGCATCCACATAAAGCAACTAACCA  
TGATCGCAATAGCACAACCAATTGGAATCCATGTGCTCAACCACGTCTGGATTGATGTAGCGGTTGATTACCAGTATCGGTGC  
CAGCGGCCAGCGCAATTTGCGGCAGGGCAATGGACAAAACGCCATAACTACCGCAGGGCCATACTTCTTAAACAACGTGGT  
CATACTTTCTCCTTACTCACTATCTTCTGTTGATTGCAGATTTAACCGGCATTCTTCAACGCCACACTTATCTTTCAAAAACCTCTG  
CCAGTAGCCTTAAATCAGCCCAGGTTTCGTAGTTCATGCTCTTTGTTAACCCGAATGGAACATGCGATCTGGCCCAACTGTTTCAT  
CGTCTATCTGAAAAACGGGATACCACGTCTTTAATGAAACCCGTTTTATCGTTACCTCCTTCACTTTTCTGTTTCAAATAGCTCC  
AGGATCTGTGATTGCAATACAAGGTACAAACGTTCCATCCATAACCTCACTCCCCCTTCGCTGTTTCTGTTTGGTTAAAAAGG  
CATCCGTATTATTTGCGCTGAAGGCATCGCCATACCCGAACCAAAAACATCTTGTTACCGTCATACTGCGTGCCGTACTTTTT  
TGCCTGCTGAGGCTCAGTCGCGGTGCTGTCCTCACTGGTCTGGCCATCAGGTAGCAGCGTAGGGATTTTCAAATCAGTTGATT  
GACGCGCCACGTTGATAACTTTTCGTGACATACCCGTTAGAAATCCCGTTTATGAGTGAGCCGGTGTGTAGCAGGAAAGCGC  
GTGTCTCAGCGCAACCTGCCCCGCTGGATAGGATTTACAGGGCGCTATCATAACAGGCTTTAAGGATGGTCTGGCTCGCCCCG  
AGGTTGATGCAGGGCTTGAAAATATCGTCAACCGAAAGACCCAGGCCACTAAATTATTTGAGTTAATTTGTGCAAGGCCCAT  
ATCAAACCTTTTATTATCCTTACGAGAACTTTGAAACGCTGACGGCCTCAGCTTCAGTACGTGGTTGCTGTTTTAACTGGGT  
ACTACCACCGTTAATATTGATCCTGTACGGCCATTTGAGGACTCATGGCCGACGATGTACGCCATTGTTAAGGGTGAACATC  
AGGCGCACATCTCTGCGCAAGCCTGGCAACTTCATCTGAGGCAGGCGCAGCACTGGCACGGCCAGCACAAAGCAAGGCAGG  
CCAGAGCGAGAACCAGAAGTTTTGGATGTTTACTCATTTACGTTTACCGCGTAATTGTAATTTTCGACGACTTATGTTTATGATA  
AGGGCTAATGAGATCGTGTCAAGAAGAAACGAAAAGAAAACCTCTGAAGGAAGGAAGGTAATGCTGGTTCCTGAAATCA  
GAAAAACGCCCCAAAGGTGAACCCATGTATCGTGACCCGGATAACCCTTTTAACTGTTGACTGGTATAGGGAAGCGCCCCG  
CCTGGCTAACTGCAAATTTGGACGCTGGCATTAGCCTGGAAGCCATGAAAATGCAGGGCGTTGCCAACCCAGAGAACATAG  
ACAAGTAAAATACCGCGACCCAGGAACGCAGAAAATACCTGGTCCGGGACTGGCCGCCACCAACATGGCTCAAAGAGCT  
GCTTGATAGTGGTTTATCACTTGATGATCTAAAGATATAACCGGAGAGTATAAAAATGGGCGATGTTATTGATTTTTCGGA  
GCAAAAAGGCAGAAGGAAGAAAAAGGCATTTTCCATTCCGCCATTTTAAAGAAAATCCGAGTCCATGCTATCAGGTTACTC  
GCCAGCATCATCAAATCCGGCTCTTATTAGTTGCTTATATCGTTAAGAAAATTACAGGAAAGTTAATTAAGTTGTTTCGCAATGT  
TAACGATTTTTCGTTTTTATTGTGAATATATCGCAGGCGATATAGGTTACAAATCTATTTATAACTCTGCGTTATTATTAATTA  
TACCCTTATCAACATTCTGGCGGGTGTATATCTGAACAACTGTTAAGGACAAAACAATGAAGAACTCTTAATCCCTCTGATA  
GCAGCTGGTAGTCTGCTTTATCTTCCGAGCCATGCTGAAGATCCCTGCAAAGTTATTATGTGCATGGCGGGCAAGCTCACC  
GGCGATAGCGGCGGAAGCGAGTGAACAGTCTGAAGCTGCTTTCTTCAATATCGTTAAAAAGAACAAGCACGGCTTTTTAC



CCAACCACACGAGGGATGCCAGGAAGGCTTTTCTTAATGAATGCCCGGATAATGGCGAAGGTGGAAGTAACCAGTCGATGAT  
AAGCCAGATCATAAGTAAATACGGGAAAGTTCGCTTATAGGCGGGCTAGGAATAATCTCAATTTAAGGAGCCAACGTGAAAA  
AAATTATATTAAGTGCATTAGCCTGTACAGCTCTCTTAAGTGGTTGCGTCAGCCAAGATAAAGGTAATGCGATGCAGAGCCAGA  
TGAATAACCAGCAACGCCAGATTAACGAATTATCCGTTTCGTTTGCAGTCTGCGGAGTCCCGGCTATCAAAGCAGGAAGAAAA  
GCTGCGCAACGAACTGCTGCAATCCAGCGGCTATTGCTATCTGAATGGCGCCCGCTACTCGACCGGCACCGTACTTTACGGGC  
GGATTTGCCAAAATCAGTCAGGCAGCGCTTCGTGGCAGGTTTACAGCCGTCGCTAAACACCAGGGCGGTTTAAACCGCCCTTT  
TCTTTACCCACAGAAAGCACACTATCACCATGTTCCCTTCCCACTACAGAAAACCTTATTCTATGGGCTTGCGAGGCCATCGC  
ACTGTTTGCCGTTGTATTCTCCGGCGTTCAGTACGCAACCGACGACACAAAAGGAAGCAGCAAAGTGCAGCGGCGGGTGCT  
GGAGCGCATAAAGACGTTGCCGGGCTTCCACAAAAAATAACTACCTGAGGAAAATTGATCCTTTTGTGTTTGAAGAACTG  
TTGCTGGAAGGATTTGAAGCGCATGGCGGCTTTGTTGAATAAATCAGATTTCCGGTAAGTCTCCCCGTAGCGGGTTGTGTTT  
TCAGGCAATACGCACGCTTTCAGGCATACCTGCTTTCGTCAATTTGTTTCAGCGCTCGTACCAGGGCCATAGCCTCTGCAACCTG  
ACCATCGTAGTCACGCAGTGTACGTGAACCTCCGAACAGCTGTTTTACCCGGTACATCGCCGTTTCCGCTATCGAGCGACGGT  
TATAATCTGTTGTCCATTTCCACCGCGCATTACTCCCGTTCAGCCGCTGATTTCGCAACAGCACGGTTACGGTCTGCATATTCACC  
GGGCCAGTAACCCGCGCCTTTTCCGGGCGGGATAAGCGCGCTGATTTTCTTACGCCGAGTTCATCGTGACAGAGCCGGGT  
GTCGTAAGCGCCGTCTGCCGATGCTGCCCTGATTTTTCTGTGAGTCTGCCGGATAAGACCCGGAAGGCTTCTGAGTCCGTCA  
CATTGTTTCAGCGACAGGTCTGCACAGATGATTTTCATGTGTGTTGCTGTCAACGGCCAGATGCAACTTTCGCCATATACGACGG  
CGTCTTTGCCGTGTTTTTACTTTCCATTTCGCCTTACCAAAGACCTTTCAGCCCGGTGGAATCAATCACCAGATGCGCGATT  
TCACCCCGGTGAACGTTTTGAAACTGACATTAACCGACTTTGCGCGCTTGTGACACTGGTGAATCCGGGCAGCGCAACG  
GAACATTCATCAGTGTAATAATGGAATCAATAAAACCTGTGCAGCCCGCAGGGTTCAGCCTGAACACGCGTTTAAATGACCAG  
AACGGTGGTGATGGCGAGATCAGAATAGCGCTGAGGTCTTCCCGTGATGAAGGCGTTGCCGACTCATAACAGGCCTGAATA  
GCTTCATCATCCAGCCAGAAAGTTATGGAGCCACGGTTGATGAGGGCTTTATTGTAGGTGGGCCAGTTGGTGATTTTGAACCT  
TTGCTTTGCCACGGAACGGTCTGCGTTGTCGGGAAGATGCGTGATCTGATCCTTCAACTCAGCAAAAGTTTCGATTTATTCAAC  
AAAGCCGCGCATGGCTTCAGAACCATCAGAAACAAACGCTATACCGGCGATGGAGGCATTGACGGCCAGGTAATAATAGGAA  
AATATCGCTATCTTATTCAGGCTAAACGCTATCGCGGCCATATTGCTTTACAGCACGTACAGGAGTTTCGAGAAGTTGCTTAAAC  
GTCATAACTGTGCGGGTCTGTTTTGCCATACCGGGAAAACCGGCGCAGGTTCAAATCTGTGAGTATTGCCAGTGAACGGATG  
GAGATTATCAGCGGCCAGCGCCTGATAGATTTGCTCACGCCCGCAGCTCCTTCACTATCGCAACCGCCCCGAGACGATGAT  
GAAGCGTACCGCAGCAACACTAGAAACGAGCACCATTGTTAAAGATGCCGTAAGAAAATCGATAACCATGAGAGTTAATTA  
AATGAAGTCAGTAACTATAGAAGCAAAAACATTTGCTGAAATGTTAGGAATAACAGAAGGTGAATTAATCTTTGCCATTAAGA  
AAACTGGCACATTCAAAAACAAGACCATCCCACAACCTCATGAGCCACATAAATCAATAATAGATTTTTATATTAGACGTAAT  
GAGGTTTATAGAATCACTAAAAGACAAAAGAGAACCGGTAATGACTCCAACCTACTGATAGTGTTTTATGTTTCAGATAATGCCCG  
ATGACCTTGTGCATGCAGCTCCACCGATTTTGAAGACGACAGTACTTCCGTCCAGCCTTGCCAGATGTTGTCTCAGATTAG  
GTTATGTGCTCAATGCGCTGAGTGAACGCTTGTGATAACGTGCAGCTTTCCCTTTCAGGCGGGATTTCATACAGCGGCCAGC  
CATCCGTATCCATAACGACCTCAAAGGCCGACAGCAGGCCAGAAAGACGCTCCAGCGTGGCCAACGTGCGTTACCTAAC  
AATAAACCTGTTAAATATCCAGATAAAAACATTCATCTGGGTCAAATGAGTGATACAGTTTACCCATAAGACCCAATGGAG  
GCAATATGTCTGAATTTGAATTACTGGCGCAGGATCTGCTTGAAGAAAGCAGAAGCGGAAGAACAACCTGCGACAGGAAAATTA  
TAAAAGCTGCTCGGGCAGGTGCTGGAAATCTATGACCAGAAGTACGTGGCTGAACTGCTTAGAAAAGTTGGTAAAAATGA  
GTGGAGTCGCGAGACTCTTAATCGCTGGATTAATGGTAAGTGCTCACCTAAGACGCTGACGTTAGCCGAAGAGGAACCTTCTA  
CGAAAAATGCTTCCGGAAGCGCCTGCACATCACCTGACTATGCCTTCCGGTTTATTGACCTGTTTGTGTTGAGGATGGAGGAT  
ACGGAAGGGCTTCGAAACCATCGGTGGCCAGTGCGTTTTTACCAGTGAATGGAATAAAGAGGCTGTGCGCACATATAAAGCT  
AACTGGTTTAAACGATGCTCAGGAACACACTTTCAATCTCGATATTCGGGAAGTCACGCTCAGTGATAAACCTGAAGTACCTGA  
AAACGATGCCTATGCTTACATTAATGAGCATGTGCCGGATCATGATGTACTTCTAGCAGGTTTCCCTGTCAACCGTTCAGCCTT  
GCGGGCGTAAGCAAGAAAAACTCGCTCGGGCGCGCATGGTTTCAATGTGAGGCTCAGGGAACGCTTTTCTTCGATGTG  
GCGCGTATTATACGCGCAAAAAACCTGCCATCTTTGTTCTTGAACGTTAAAAACCTGAAGAGCCATGACAAGGGTAAAAAC  
CTTTAAAGTCATCATGGATACCCTCGACGAACTGGGCTATGAAGTTGCGGATGCAGCTGAGATGGGCAAAAACGATCCTAAA  
GTTATCGACGGAAAGCACTTTTTACCTCAGCACCGAGAACGTATCGTTTTGGTCGTTTTCCGTCGTGATCTGAACATTCACCA  
GGGCTTTACCCTGCGCGATATTAGTCGTTTTTATCCGGAACAGCGTCCGTCAATTTGGCGAAGTCTGGAACCCGTGGTTGACA

GCAAATATACTGACGCCGAAACTCTGGGAGTATCTCTATAACTACGCCAAAAAGCACGCAGCTAAGGGTAACGGATTCCGGT  
TTTGGCCTCGTTAATCCTGAAAATAAAGAAAGCATTGCCCGTACGCTTTCTGCTCGCTATCACAAAGACGGGTCTGAAATTCTG  
ATAGACCGTGGCTGGGATATGGCCACAGGTGAAACAGACTTCGCGAACGAAGAAAATCAGGGCGCATCGGCCCGCAGGCTG  
ACTCCACGAGAGTGC CGCGCCTTATGGGTTTTGAAAAAGTAGATGGCAGGCCTTTTCGCATTCTGTGT CAGACACTCAGT  
CGTACAGGCAGTTCGGTAACTCCGTAGTGGTGCCCGTGTGTTGAAGCCGTAGCCAACTGCTTGAACCTTATATCCTGAAAGCG  
GTTAATGCCGATTCTGTGCAAGGTTGAACGAATCTGATCGCTCCTCCCGTATTTATGCCGGGAGATAATCTATGGAATATCTGC  
GTAAAGCCCTGT CAGCTCAGCAATAAACGCACCTAGCGTCATTAGCTCAGCTCTCACC GCCTCCGGGTATTTTTTGTGCAGCG  
ATGATGGCACGACCAATCTGACACCCGACTCCCGCATCTCCCGATATTGAGCCAGAGAAACTCCCTCTTGAGTGTAAACAGA  
TGCACCTGATGAATTTTATCGGCCTCATT CAGTATCTGACGCCAGCGATCCTTACAGGTAGTCTTGACTGCCAGCATGCGCAGA  
TTTTCTACGGGAAACTCAGTATCGTGGTAAGCCCCTGCGGAAGGGAAAAGGAAATCGGGTTTTTTATTACCTTCTGTGATGGC  
CTGCGTCGCAAAGTGTGCGCAGGCCGTGCTCAATGAATAGATGCTCCAGGTGCAGTTCAGAGACTTCCCGGCTCTGGATTAC  
GGCGATTGCTGACAGAATTGGCCAGCGCAATAAATTCATCCACAGAGCCAAATCCTTTCCGGATGATATCCAGAACATGCAGT  
TCCTCAACCAATAGAAATATGTCGTA CTCCACGCGCCGGCGGTCAAGAAGTTGCTCATCCGGATCAAGGGAATTTTTACATA  
ATGGCTGGCTGCATACTGAATAATTTCACTTCCCGACGGAAAGCGCAGGTGCCAGTCTTCAGGTAGAATATATTTATGATTTAC  
TGCGCTTGCTGTAGAGATAGTCCGCCTAGAATCTGTCTGCGGGGCCGGATATAAGCGCTCCGGGTATAACTTCACCAATAG  
CGGTCTCAATGACGTCTCTTCATCAGTGTGCGCATACCCAAATATTTACTTCTTACAGTCCCCCCTTGCTCATCAAGCTT  
GAAAGCCAGGAGCGTCAGAGCCCCTGTATTTTCAGGATTCTGAAGTGGGCTGCCTCTACCCCAGCGGGTAATCCTTTTTTCAT  
TCCGGGTTTTACCAAATGACGGCTGTTATAATAAATTGCCCGGGCTTCGCTGT CAGGGCAATCATGCGATGACACATGTGCG  
GTGAGAAAAACCGAAGGTT CAGTTCACGGGTATGGTTGATAGACGGAAAGAGTTTTTCAACGATACCTGAAGGGATATAA  
AGCCCTACCTGGTGACCACCTGTTGCGCCGGTATCGTTGGCGGAAAGGCGTTTTGATGTAGACGAAGTAATTCTCACATGCGAT  
CTCAAGTAGCCAGTTGTGAAAACCGACATAAGCATCCCCTGTTACCCTGAAACTCTACTCACCATTTTTTCATGATTATATACA  
AACAGCCAGAAAGGCTGTTACAGACGATTTGATCTGCAACCTATTGGTTAAATTAATGTATCAAAAACGATGGTTTTTTGTGACA  
GTCTTGAAGTCTGACTTCTCCGAAAAATGACTCCCCTCATGTAACAAAACCTGTTACTGTATCAACATAACAATAACCCCA  
TAACTAATTAGCGAGAAAAGAATGAAAATCGGCTATGCACGTAAATCGGCACTGTTGCAAAGTTAGCGATGAGGCAGCCTTTT  
GTCTTATTCAAAGCCTTACATTTCAAAAACCTGCTTACCAGGCGCATTTCCGCCAGGGGATCACCATAATAAAATGCTGAGG  
CCTGGCCTTTGCGTAGTGCACGCATCACCTCAATACCTTTGATGGTGGCGTAAGCCGTCTTCATGGATTTAAATCCCAGCGTGG  
CGCCGATTATCCGTTTCAGTTTGCCATGATCGCATTCAATCACGTTGTTCCGGTACTTAATCTGTCCGGTGTTC AACGTCAGACGG  
GCACCGCCTTCGCGTTTGAGCAGAGCAAGCGCGGACCATAGGCGGGCGCTTTATCCGTGTTGATGAATCGCGGGATCTGC  
CACTTCTTACGTTGTTGAGGATTTTACCCAGAAACCGGTATGCAGCTTTGCTGTTACGACGGGAGGAGAGATAAAAATCGA  
CAGTGC GGCCCCGGCTGTGACGGCCCCGTACAGATACGCCAGCGGCCATTGACCTTCACGTAGGTTTTCATCCATGTGCCA  
CGGGCAAAGATCGGAAGGGTTACGCCAGTACCAGCGCAGCCGTTTTTCCATTT CAGGCGCATAACGCTGAACCCAGCGGTA  
AATCGTGGAGTGATCGACATTCACTCCGCGTTCAGCCAGCATCTCCTGCAGCTCACGGTAACTGATGCCGATTTG CAGTACCA  
GCGTACGGCCACAGAATGATGTCACGCTGAAAATGCCGGCCTTTGAATGGGTT CATGTGCAGCTCCATCAGCAAAGGGGA  
TGATAAGTTTATCACCACCGACTATTTGCAACAGTGCCGGTCGCCGGGAGTCAGCAGATCGACGTCAACGCCGAGCAGCGAT  
TTCAGTTCTTCTTCAAATCGCCAAAGTCCAACAACGTGGCACCGGGCAGCGCATCGACCAACAGGTCGAGGTCGCTGCCAT  
CCCGGTGCGTGCCATGCAGCACCGAGCCGAAGACGCGCGGGTTCGCGGCGCGAAAGCGGCCTACCGCTT CACGCACTGCG  
CTTCGCTT CATGTCAAGCACAACAGACGGTCGCATGCGCATCCTTTCTTATCGAAACTCGTTGAGATGATATGCAATCAAGAAT  
AGAATTTCAAGAACTCACAAAGTAACGCGGTGGTTAATATCCTGTACCCACGGATTGCCCTTAGCGCTGCCTATATCGGCTAAA  
GCACTCCGGTAGCTTGATTCACCCACGGCCACGGCAGGATCTTGCCGTGCGAAGCGCCAGGGGAAAATCTT CAGCTGCA  
AGCCTGAGTGATTT CATGTGCGTGTAAATCCATCGCCAGATGATTTTTGTGAAGAAGAACTCGCGCTCGTTCATGTCCGGGCG  
CGCGTCTGGCCCTCCGTGCCAACGGCCAGCAAGTAATCGGCCTGAATTGGCAGTATCAGCGCGCGTAGTAAGTCATGGATC  
GCCGTTGCGGCAGTCTGCGCGCCAGATTAATTACCCGGT CGAACTT CAGTTTATCCTGCTTGCCTTGTCCGGTCTGCTCCATC  
AGATTT CATGGCCCCCTTCTT CATGCTCATGCTCATGGGTGTGTTCTTTCCGGTATGGCTCTGTTCCGCCTGAGACGTCTGCG  
GCATGGCGTAATCGTCGTAAATGCTGCTGTCAAAGTCGTAGTCTGATGCTTCGGCATAATGCTCGTAATCGGCATACTCCTGCG  
CGCTCCACTGCTGATCGTCGGCAGCAGCATAATCATGGGCCAGCTCTGCATCATTTTGCTGTGCTT CATGACGCCG CAGGCCA  
ACGGAATCATCCATAGGGTTCTGCTTAAAGATGAAAGGCGTCTCTGCGTTGCTCACCGGCTGATAATCAGTGCCGGTTGTCAT

GTTATGTTTCATCGGGTTTCTGGTTAAACGCCATGCTTTCCCCCGTGGCTTCTGGCAGACCTTTTTTCAGCTGATCGGGTTTCTAA  
ACTGGTATCGCGGCCAATATCCTTAAACCTGGCCTCAAGCCCAAAGAAACGGTCAATTTCTGCGGCCGTGGTTTTCGGGCTGT  
CGCGGCTCACGCTCGATGCCAAAGATTTTTTATCGTCGGTAAAAATTTCCACCTCATGACGCGCACGCGAAATACCAACATAAA  
AAACGTCCCTAGAAGTGGTAAGCGATTTGGTATCTATGTTGAACAACACGCGATCACAGGTAAGCCCTTGGGATTTGTGGACG  
GTGGTTGCATAAGCATAGGAAAGATAAGAAGCCTGTTTTTTGTCCAGCTCAACCGTGCGCCCTTTTTTGTCTCAAGCGTCAG  
TTTTTACCCTCCACGGTTTTTACCCTGGAAGCGTCCGCGTTGGCAACGTCCAGCGTTTTATCGTTACGCGTTACCATAACCTT  
ATCGCCCGGCCAGTTCGGCGCTGACTGCCTGGTATACAGACAGCTTGGTGTGTGTACGCGGGCTGAAAGCGATCTGCTCA  
CCGCTGCTGCTTCAACCGTCAATTTGTTGCCCGGCCGGTATCAAGAACCTGGTAAGACTCGCCCCGCTTCATAACATTTTTG  
TAATCCTGTTCCGGGATAATGATTTGCCCTTACTGAAATAACGGCTGTGCGGGCGTTCGCGCTGTGTGCAATCCACGCGGTCA  
AGTAGCGTGAACGTTTCGCCGGTTCGGCAAGCCCCAGATTGCCCGGATGTAGTCATTGAGGGTTTTGCGTGAGGCGTTTCG  
TACCAGAGATTATCAGGGTGGCATCCTGTTGTTCTGAGGACAGAGACAGGTAGCGATCGGCAAGTTGAGCGAGTCGGGGCG  
CTTCTTCTTTCAGTTTCGTTACGCGCGTGTATTTTTTTCAGGGCGCGCGCGGCATTACCTTCAGCGGCATACTTAACCGCTCAA  
GCAAACCTTCACTTCTGTGCTGAATGTCTTTTTCATGTAGCTGGTCTGCATATCTGCTTTAATCAGCTGCTCAAAAGGCTTACC  
GGCTTCTACCGCTTTCGTTCTGTGACGTATCCCCAGGAATACCGCGCGAGCGTTATGCTTCTCGATCACCTCCATCAGCTGTTTC  
ATCTGTCCGGCGGGTATAACCCCGCTTTCATCAATGAATACGACTGATTTTTTTCATCCAGCTTTTTTATCCTTCGTTTTGAGGAAA  
GCGGCAACGGTGCGGGCCGGTAATCCATCATCTTCAAGCGCTTTTTTCTGTGTCCCATAGGGGGCCAGCGCCGTGACCTTCA  
GCCCTTGTGACTCCAGCAGCTCTTTAGCGGCCATCGTCATATAGCTTTTTACCGGTACCGGCGTAACCATGTGCGGCCACAAACC  
GATCTTTGCTCGTCACAATTTCTGTAACCGCGCGCATCTGCTCCTTCTGAGGGTTTTCCCGGCAAGCAGCTGGCCTGCAATCT  
CTGCGGTCAGCTGTGCGGGCATCTGCCCGGCCGCGTGTATTGATAGTCAGAATGGAACGCTCAAGGCGAATACCCTCCAC  
GGTAGTGACGCGGTGGCTGGTCTTTTTAAGCCTGCCGTTTTTAATACCATCATCTACCGCAAACGGGCTTTATCCGCACGCAT  
CCCGCTATTTCGTCAGCGAGTCGATCCACTCTTTGCGCGTCAGAGTTTCGGCCATAACTGAAGCACCGACCTTCAGAGTTGATT  
GATACCGGGCTTCGCCCTCGATGATGGCGCCCTTCTGTACCGCCTTCAGGTACGCTTTTTTCAACATCGGCTATTGTGGCATGGC  
CCAGCACCTGCTTATTAGCGATTTGAATCAGCTTCTGGCGTTCAAAGCTGGCATCGCGCTCTGACAGCGACTTAACTGCAAAC  
TGGATAGCCCGGTGAGCTTTAACCTCCGGGCTGGTAAATCCGGGGCCATGTTGCGCGCTATATCAGCCTCCAGAGGTTTACC  
GTGTCCCTGCCATTCACGGTTATCAAATCAATGCCGAGCGTTTTTGGCGCGGCTGGCCCATTCCTGGTGAATTTCTTCACGGG  
AATGCTCTGTTTTCTTTTTCACGCGTAGCCATCGAGACGCGGCTTTTCTGTCTGAGCATCGGCGGTTCCCGCGTCAGACCCATT  
GCAGCGAGTCCCTTTTCAATTTGCTCCGACCGGCCGGGAAAAAGCGGAATCTGTTTCATCTGAAAAATGGGCCATATCGAACG  
TGTTATTTTTGCTGTTGTAACGCGAGCTCATAACCGGCTTTGGTCAACTCCAACGCCAGCTCCTGTTTGTAACATCGCCCAGGT  
GCATTTTGTACGCATCAGCTCATCATTTTTTGTAGCGCGCGCCACTGGCCGTCTCGCGCTGGGTCATGTTTCATGACAAAAGCG  
TGTGTGTGCAAATCAGGATCTAGCGCCCTGGAAGTTTTCTGTGGCGGAAAGTAGCGACGACAAGGTTATTGGTATTCTGGGTTA  
CTGATTTCCCCTGGCGAGTCGTCCGGGCTGCGCGAGTTTTTTCAGCTTCACGCACAGCAGCGGCAACAGCTTTTTTTCATGAGC  
CTCGATAATGGTTTTTATCGCCGTGTATCAGCGCCTGCATGGATAACCCCTTTAGGCGCTGAAAACGTCAGGTCGTAGCCCAGAC  
GCTTTTTTTTGGCATCACCCACGTGTGCTGCATATGCGTGAAGGTATCTATCTCTCCGACAAGCAGCTCTTTAAACCGGGCTG  
ATTCAACGTCCCCGGATAAGCCGAGGGCTTCAGCTCCGTTCCCTGCCAGGACGTGAATGATGAATCCTTACTGTAGTAATCA  
TCCTTTCATCAGAGTAGTAGCCACAACGCTAGTGACGTTCTGGCGGGTAATCGTGGTTATATCAAGCATCAGATCTCCCTCA  
GTTCAATGCCAGGAACAGGGTTTTTTCGATGGTATTTAACGTGTTTAGCCTTGAACCTTAGCGACGGGCATATCACCAGGCAAC  
GCCAGATAGCCGGTGAGGTTTGGCAACATTGATATTTCCGGTAGGCGTTACGGCACGAACAACCTTAAACGTGCGGGCGTTTAC  
GGACAATCCAGGGCTTCTGAGGATCGGATTCTTTACGCTCAACTTCGCCTTCTATCTCACCGAGTGAGCGCGACATTTGATCC  
AACGTTTCATCACCGAGACGGCTGCCGCCAGCACGATGTTAGAACGCATGTTAGCCAGAATTGTCTGAGCCATATCCCGACC  
ATAAACCTTAAACAGCTGAGAATAGGTTTGATAGCCAGCATAAACACACAGACCGCTTTTACGCCCTTTGGTCAAGTGCATCGTT  
GAGGTTTGGCAGAACTGGAGTGATTCCAGCTCGTCAATAAATACATTAATGCGGCTTTCTTTTTTACCATAACCCAGCACGAT  
AGAAAAATCGAATCCAGCCAGCAGGAAATTAGCGGATTAAGTGACCTTTTTCATTTCTTCTGCCAGGTGATAAACAGGGTTCC  
CCGGCTTTCCATCATCAAGCCAGTCACGCAGGGGAAAAATTACCTTCCGGCATTTCATTAATGTGGGGCAAGATTCTTACTGAGA  
ACAAATCGCGCGCTTCCAACCTGCTTTTTTTCAGACCCGGAAAAAATAGCTTCGGCAGGCGTCCCCATTAAAAATTCTTTAATTTT  
TTCTGGTCAACGTTACAGGCCAGTGAATAACTTCTTCATAGTTACTGTGCTGTATAGGCTGTGAAGTTTTTTTCGAAACTTCA  
CTAAAAATAAGACGGCCATAGCCGAACCATCTTCAGTAGCCATATCAGGGCTTTTCTGAACAATAGAGTTCACTAAACGCTCG

TAATCATATGAACGGCGAATTTTCATTGAAAAACACCCAGCCTTCAGTGCCTTTATCATAGGCGTTTAAAATAACATCGCCGGGA  
CGATAGAAATTCCTTAAGAACCCCCATTTGGATCTAAAGCAATATTTTTGCCGCCTCTAATGATGCTCTTAAATAACAGTTCATT  
GAAAATTGTGGTTTTACCAGTACCGGTTGTACCGGCAATCGAAAAATGCAAGTTCTCAGCGTATGTAGGTATGGGGATATTAG  
CCACGGTTAACTGGTTGACACCTCTTTCGCGTGTTTTATCAGCGAGTGTCTGGCGCGAACAAGCTCTGTACCACGATAAATCT  
TTTTGAATCTTTCGCTTTAAACACGCGTGATTTATCATAAATGATAAAAGCGATCAGACCGCCAACCAATAAACCAGCCAG  
CAATTAAGCTGACCATAAAGGCCATAGCGAAAAAGTATTCTTAACCAGATACGGAATCAGGTATTTAGCCGTGGATGGATCA  
ATACCGTAGGTAAATTTTGCAACTAGAAACCATACCATCACTGGAGGCAAAGTAATTGCAAATAAAAATGCTAAGCCTCTTTCT  
CTATCGTCCATTTACAGCGCTCCTTTTTTGGTTCCAGACTTTGTAGCCGTTACGTTCAACCTCTGCTTTTGGCGCTTTGGTTTTG  
CCCGTTCTGCTATCGAGCGCAGGAGGATTAGCGTTTCAATAGCGAGTGATTCATGCAACATCATCTGTCCTGCCGGTGGGAA  
TTTTACGCCAGATAGCGTTTCGGTTATTGCCTTCAGCTCATCGCGCAGTGGGCCAAAATCCGCATCTGAAGCACGGTCAAAAA  
GATAATCCAGTTTGCATTTACGTGCTCAGCCGGTCCGCAACTATTTCAACCCGGACTCCCAGTACCTGGGCCAGCTTCA  
ATGCAGCGCCGAGATAATCTGACCGATTACCTCCTGAAACCAGGTCTATATAGGCCAAAAGTTCATCTGATACTTTTGGCGTT  
ATTATTGGCATTTCAGTCTCACATTGTGCATTTCTTAAACAAAAAATTGGGATCTAACAAGCTGAAATCTTAGTATTACCAAAGT  
AATAAAGCAAACCTCATTATAAAACAATGGGTATTGGGTGTTTTTAATACCTAATTATTACCGAATATTGACGCTATTTATTTTTT  
ATCTTTTAAATCAGTACGATAGCGTGATTTATCGCGCTGCGTTAGGTGTATAGCAGGTTAAGGAAAAAAAATCATCTTTTTTGG  
TAGGAGCGACCTCCGTAGGTTAAGGGTCATTTGGCTAAAAAGCGTCCTATTCTTTGATGGTCATGCTTGCATGACCATCTGAGC  
AACCAAAAACACTACAGATAAACTACAGAGAACTACAGATAAACTACAAAAACGATTTACCTTAGCGTTTGCAGACTACTAATA  
GACTACAAGGAAACTACAAAGAACTACAAAGAACTACAAAGAACTACAAATAGACTACTAAAACCGTGGCAGACTACTA  
ATAGACTACAAGAAAACACTACAAATAAACTACAAAACCTGGATTGACCCCTTCTTACGAGTGTTGTAGAGTCATCTTCATACAACG  
GAGGGGGTTATGAATAAACAGCAGATCTGAAACCCCGCAACTTATCGGCTGCTGTCAGATTGCGCCTAAATGAAATCGAGA  
ACTGGCTGGACAGAGGGCTAACGCGGCATGAAATTGCTGAAATCCTCGACAGCGAATACAGCTTTTTCGGTAACAGCCAAAG  
GGCTTGAGATGGCACTGTATAGAACGCGGCAAAACCGAAAAAATGTATTGCACAATACACATGATAAGAGTAGCGCGAAGGG  
TGCAGCGGAAAGTGTATTGCACAATACACAACCGTCTGAGCCTGAAGCGCAGGAAAGTGA AAAAGCAGAGAGTCCCGGCAT  
TATTGATAAAGAGTTCTTCAATAAAATCGGTGAGGATTTCAACCCTAAGAAGTTCAACAAAAAATTCTGAGGTGATTTATGAAA  
GTAGCGGTAATTAATTACAGTGGCAGTGTTGGTAAAACATTAATTTTCATCTTACCTGTTAGCCCCGCGCCTGACTGGTGCAAAG  
TTCTATGCGGTAGAGACTATCAACCAGTCTGCTTCCGATCTGGGTATTGAAAATGTGACCAGTTTTAAAGGTGACGACTTCTCA  
CGTTTGATTGAGGATATTGTTTTTGAAGATGCAGGCATTATTGATATTGGCGCGTCAAACGTTGAAGCGTTCTGATGGCTATG  
TCTCGCTTTGACAGTGGCGCGAACGAATTTGATAAATATGTAATCCCGGTGACGCCGATAATAAGGCGATTGATGAAAGCCT  
GAAAACGGCACACACGTTAAGTAAAGCGGGCGTGAGCAGCAAGAAAATTATCTTTGTTCAAACCGTATTAGTCCAGACAGT  
GAAGTAGAAGATGTGCTGGCGCCGGTGTGTTGAGTTTGTCAAAGAAACGAAGATTGGCAAATAAGCAAGAAGGCTGTTATT  
TATAACAGTGAGGTTTTTGAATATCTGGCGTTTACCGTATCTCATTTCGAAGTATTGACCGCTGAAGATCCAGAAGAATTCAA  
TCCCGTGCAAAACAACAACCGATGCTGACGAGCGCAAAAAACTGGCACGCCGTTATACATACATGAAACAGGCGATTCCGG  
TAAAAGCTAATCTCGATAAAGCATATGCGGCTTAAATGGGAGAATAAAATGGAAAAGCAGCCGGATAAATTAGAAGTTCTGAT  
GGACTGGTTTTTTAGGTGACGCGAAGGAAATCACCGCAACTCAGAAAGAAATGACGCAGAACTTTCTGAGCTTTTCGAAAA  
GCTGGCAAAGACACCGAAAGTTTAGGAGAGACGGCAGACTCTTTTAAACGGGCTTTAGTAGAAAACCAGCGTTCAATTAG  
CCTGGCAATTAGTGATGATGCTAAGGCGCGCAGGAATTTCTAACTAAATTCCGCCGCGCGCAGGCGTCCAGTGCTGAGACG  
TTTACCCGTCAGATCCTTTTTATTACAGCTGGCTGCACCATCGTGGGCGCCGAGTAGGCGCCGCGATAGCGATACTTTTACTG  
AGATAAAGCAAACCGGGCGTGTCCCGGTTTTTTTTGTCAAGCGGAGCGCGGAGGCCGAAGGCCGAGGCATTAGTGGCCGC  
CGCCCGGTAAGCGGGGCGAGACGGGAACCGGCTCGAAGCGCAGCACGGCAGAACGGCCCCGAGGGGCAATGCCGTT  
TTAATTCATCGTGACAGTGCAGCGTGACCATCACGGGGAGAAAATAATGAATGACCGACAGCGAGAAGTGGCCGTATACG  
CCAGGCCCGCCCGCGCGCGGCTCAAGGAAGAAGGCACAAGCGTGACAGTACGCTAACAAAACAGGAAGAAGCAATGT  
TGCAGGAGCTGTGCCGGGTTCCGCTCCTGGACGAACGCCTTATCAACGAACGAATTTTTCCAGCTGCTGCTTATCCGCAAC  
TGGCAGCAGTGGCAGGAGCAGAAGGCACAGCTGGGAAAATGCCAGGCTTGCAGGAAAGCTGAAAGCGGAGGGGGGGTGC  
GAGGGTGAACGGAAGGCGAAACCTTAACTGCTGGCTTGGCGTGAAGCCAATGAACTAAATTTGTAGTGTATTGTGCAAT  
ACACATTTACACAGAAACAAAAACCACCGCAATTCTGGAACCGGATACCTACGGCTATTCTGGGTGAACGGTACTTTTTG  
CACCTGGGTGCGCTGAAAAAGCTGAATATGCAGGGTGACGTTTCGCGTGCTGTTCTGCTTTGTAGACTGAATGCGCCAGCTATA

CGCCTGACTGCTTAAACCTGGTAAAGTTCTGCAACCGGCACTGACCGGAAAGCAAGGCAGGGAAGACCTAAGCCAGAAACC  
TTGACTGCTCCCCGCCCTTCAGGGCGGGGATTGCGGATCATGTTCTTCTTTTCAGGGATTCAACGCAGACAAGAAAGGCTT  
TCAATTTCTATACGTGAACGGCCGCGCAGCGGAAAGAAACAAGCCCGGTCAATCCGGGCTTGTTCCTTTAGGCGGCTCAGA  
AATCGCCTAAAGGCCCGGCTTGCCGGGCGAGTCAGTGCTATTTAGTTTGTGTCAGCAGCTGGCTTAATTTTGCCGCCAGTGCA  
TACGTTCGATTGAAAGCGCCTTGACAGGCGCTGATTAGGCAGCTGGTTGAACGCTTCGAGGCAGGCGCGCAGCAATAATTCTT  
TCTGAGATTGACTTCTTTTTTTCAGTTGGGAAGGGGTGGTAACTGTAGTCATGCTTGCTCCTTAGTGAGCCGATATCGGCAATT  
TTTCGGGTGGCGGTGTTGCCTCCCGATGATTAATTATCGGTGATTATGCTTTTAAAGTCAATACAGGTACGGAATTTATTTACC  
TGTTTTTATGCCCGTCAGGGCATGGAAGGCGACCGCGCCGGACTCCACCGGACACCGGCCGCAAATCGCCGGAAACTGCGG  
GACTGACCGGAGCAACAGGCCAACCCCCCTCCCTGCTAAGCCATAACCCAGCCCGCCGACGCAGCTGCCGACGTCCCCC  
ACGGGGGTGCGCAGTGGGCGCCGCGCCTGCGCGCGGGTACGGCGGCCCGCTGCGGGTTCGCGGCGCCGTACTGCGAG  
TTAGCGGCCGCCGCGCGGGCGTTACGGGGGACACCGCACAGTCACGGCCAGTGCCCCGCTGAGCTGCACAATCCACGGAT  
AACACAATAGCGCACTGGCAAAGGATGCCGACGCCTGAAGGGCGTGGGCACCCCGAAGGGGCGGGGCGGCCGCTTGCGG  
CCGGGCGAGTCCGGCGCAGGGTGTGTCCTGCCAAGCGGAGCGCGGAGGCCGAAGGCCGAGGCGTTAGCGGCCGCTGC  
CCGCGTAAGCGGGGCGAGACGGGAACCGGCTCGATGCGCAGCACAGCAGAGCGACCCCGAAGGGGTAACGCCCGGTGTG  
GCATCAGGATTTAGTGCAATGGCAGAACATGAGCTGGAGAGATCACCGGCAAGCAGCAGCAAAGGGGCGGCACAGCCGCC  
CCGATGGCTGTTTGGCGATAACGGCGATTAATTAGAGCGGTGTTAATATCCCCGCGTTGCGGGGGACTAGGTTTCAGCAAG  
TCATGTTAAATACGTGTCCATCATGTAAACTGAAATCCCCAATAAACAGATCCCGCGCATAGGCTACGATGTCAAATATCGGGC  
TACGGATTCCGGAATATCATTACGTAGACCGCTATCATTACGGTATTCCTCTGCAAAAGTTTCTTCGTCTTAGCTTCGCCATAT  
AGGCATCTCTAAACAGGTCGAAATCAGTGCTATTAACAGATCAACAAAGGCCACAAACGCCGCTTCGTTACCTTCTCGCGG  
GCTTGTTTAAAGCCGTTAATAAAATCCAGTTGATATGGCACTCTGACGCCATAACAGACGGAATACCTCCCAATCTTGGAAC  
ATAAATTCTGGATCAGCCTCATTGCGTGTAACCTCGCGGCGAGCGCTCGTAAACTCCTCTGAGCTATCAAATCGGTCAGATCG  
AGCCAGGCTCCCGCAATGCTTCCGCAAGTTGATTTATGGTAAGTGCCAAACATAAACAGAAGGGGTGTAATATCAGTCATGGT  
GTACTCCTTAAAGCGCCGATACCGGCAATTTTTCGGGCGGCGGTATTGCCTCCCGATGATTTAATTATCGTTGATTATGCTTTTA  
AAGTCAATACAGATACGGAATTTATTTACCTGTTTTTATGCCCGTCAGGGCATGGAAGGCGACCGCGCCGGACTCCACCGGAC  
ACCGGCCGCAAATCGCCGGAAACTGCGGGACTGACCGGAGCAACAGGCCAACCCCCCTCCCTGCTAAGCCATAACCCAGCC  
CGCCGCCACGCAGCTGCCGCAGTCCCCACGGGGGTGCGCAGTGGGCGCCGCGCCTGCGCGCGGGTACGGCGGCCCCG  
CCTGCGGGTTCGCGGCGCCGTACTGCGAGTTAGCGGCCGCCGCGCGGCCGGTTACGGGGGACACCGCACCGTACGGCCAG  
CGCCCCGCTGAGCTGCACAATCCACGGATAACACAATAGCGCACTGGCAAAGGATGCCGACGCCTGAAGGGCGTTGGCACC  
CCGAAGGGGCGGGGCGGCCGCTTGCGGCCGGGCGAGTCCGGCGCAGGGTGTGTCCTGCCAAGCGGAGCGCGGAGGCCG  
AAGGCCGAGGCGTTAGCGGCCGCTGCCCGGTAAGCGGGGCGAGACGGGAACCGGCTCGATGCGCAGCACAGCAGAGC  
GGCCCCGAAGGGGTAACGCCCTGTGTGGCATCAGGATTTAGCACAATGTCAGAACATAAACTGGAGAGATCACCGGCAAGC  
AGCAGCAAAGGGGCGGCACAGCCGCCCGATGGCTGTTACTTGTCTTTGTCGCGTAGCACTTTGATTAGGCCGTTACGGCC  
GTAATCAGAGCGGCCAGCGAGGTGATGATTTGCGGTAGGTTTTCGAGGATGGTAGAGGTCATATAGCACCTGTAGAGAAGTT  
GGCGGGGTGTCGTTTCCGACGGCCGCACTGTAACCGGGCGAATAAGGCAGGTTGTCAACAGCTTGAGCGAAGCGTCTGTTG  
ACAACCTGCCGCGCCCGTTTTACTGCGGTCATAGGCGGAACGACCCACGCCAACGGAACGGCTTTATGACCGGGCAGCTG  
AGATAACGGCGAACCTGGCTGGCGGCTGACGCCAGCCGCAAGCGCCAGCGCGGAGGGCAAAGCCCGGAGGCCAAGCGG  
AGCGCGGAGGCCGAAGGCCGAGGCCGAGGCGTTAGCGGCCGCTGCCCGGTAAGCGGGGCGAGACGGGAACCGGCT  
CGATGCGCAGCACAGCAGAGCGGCCCGAAGGGGTAACGCCCGAGTCTGCCGCTGTTTATCTCTCGTTCCATCTGAAATCG  
GCGGTAAGGCCATTAAGGGGTGAGTTTATCAGGGAGGCGTTAGCCCCCATGTTGTTAATCATCAGGCAATATCGTCTTTGTA  
GCAGGCATAACCGAAGCTAAGCTCTGTTTTATAGTGGCGGGCAAAGTCCCAGGCATCGTGGCCGAAGTCTCATAATCTG  
CCAGGACGATTTGCGGGCTTTGTGCCATTGCTGTACGGAAGAAAGCGGCAGAACAGGGCAGGGGTGCGACCAGTCAGTG  
ACGGTGTGTCAGATCATATCTGCCAGACGCTCCAGGGAGCCGTAACCCAGCTCTGTGCGCAGATCCGCCACCATGCGTTGTT  
ACGCAGTGATGCCAGATAATCAATCTCTTTGGTTATATCAGAATTAAGCGGGTCTGGTAATCCATGATGTACTCCTTTGCGCGC  
CGATAACGGCAATTTTTCGGGCGCAGGTTGTCCTCCCGATGATTAATTATCGGTGATTATGCCCTCAAAGTCAATATAAGTA  
CGGAATATGCATGCATAATTTTATATCTTGCAAAGCGTTCATAGAGTGCTGAATCGCTTTCTGACAGCCTCAATAAAAAAGG  
CGGGGATTCCCGCCTTTTTTCTTACAGCTGCTTACGTGGCTTTTTACCGGTCATATAACGGTATCGCGCAGTCTACCGCGTA

CAAAAAGCACGCCAGCGCGCCGCAACCGTACAGAAACGCAAGCGGCTTATTATCGAAGTAGCTGAAAACCCCTGTCGCCGC  
ACACAGGCCAGAACAGAGACGCAGGCGCAGGTGATCTGCACCAGATCCCTGTATCCCGCACGAACGATAAACAGGGCAG  
GGCAAGCGCAGCGGCGCTAATAATTAATGCGAGAGGGACAAAACGAGATAGTGATACATGTGAACTCCTTGATGGTTGCCG  
ATACCGGCGATTGTTCCGGGCGGCGGTATTGCCACCCGATGATTTAATTAGAGGTTTTGCGCGTCCAGGAGATTGACCTGAGCC  
GGGGTAACGTGAAACTTTTCCCCTTATGGATCACGTTATGCGGGGCGCTAATTTTCATCACTGATAAAGCTAACCGGGTAACGT  
TTTTTACCCAAATCCGCTCGCTAAACCATGCCACTTTTGCCGCTGGCCGATCCACTGGATGAACAATCACACCGGCCATGCTG  
CAACCCGTTGCGGGTTCGTCCAGCGTAATGCTTACCGGGACTGTATCCCGGTAACAAAACCTTAAACCGGCGGCACACCTGCCT  
GCGTAGCGGCTGCGACAACCTGCAAGCCCGATAACCGCTATCCGATTAATAAGCATTATTTCCCTTACTCATGCTGATATCACC  
TTGCCAGCTGTTACCAGTTTACGAAATTCACCTTTCATGAATTTACGCCCCATGCTCAAGCGTTGAATACACGTTGCCGATAAGC  
CAGTTACCAGCCGTTTTTGTCTCGGTATACCACCATGCTTCTGTGACAGTAAGCAGCGGTTGCTATCCTCGCCCTTCTCATAGA  
TCCAGATTTTAGTGACGCTTTACCCGTTTCGTTGCTGCCCTGAATGGTAGGGTCAAAGGTATGTTCAATCTCTATATCGAAGTA  
ACGCTGAAGGAAGTTAGTAAAGTGCATGACGACTCCTGTAAGCGCCGATAACCGGCAATTTTTCGGGTGGCGGTGTCGCCTCC  
CGATGATTTAATTATCGTTGATTATGCTTTTAAAGTCAATACAGGTACGGAATTTATTTACCTGTTTTTATGCCCGTCAGGGCATG  
GAAGGCGACCGCGCCGACTCCACCGGACACCGGCCGCAAATCGCCGAAACTGCGGGACTGACCGGAGCAACAGGCCA  
ACCCCCCTCCCTGCTAAGCCATAACCCAGCCCCGCCACGCAGCTGCCGCACGTCCCCACGGGGGTGCGCAGTGGGCGC  
CGCGCGCTGCGCGCGGGTACGGCGGCCCGCTGCGGGTTCGCGGCGCCGTAAGTTCGAGTTAGCGGCCCGCGCGCGGCCG  
TTACGGGGGACACCGCACCGTCACGGCCAGCGCCCCACTGAGCTGCACAATCCACGGATAATGCAGGAGACGAATCATGATA  
GGAGGCTGAAGGGGAAATGAGCGGCAGCAGGGGAAGGGTTGCCAAGCGGAGCGCGGAGGCCGAGGCCGAGGCCGAGGCGT  
CAGTGGCAGCTGCCCGCGTGAGCGGGGCGAGACGCGTAGCGGCTCGATGCGCAGCACAGCAGAACGGCCCCGGAGGGGT  
GACGTCCGGGGTTCGCTTTTAAAGATTTTCGACCACATCAGTAAATCGTAGTGACACCATGAAGCAAAGTATCGTGCAGAC  
CAGAATCAACAACAGTAACAGCAGACCTTTTTTTTCGACGTAATAAAACCGGCCCAAAGCGCCCGCAAGAAGCACACTCAAC  
ACGATTTCCGTTATACTAATCGTATTCATAATCTCTCACGTTTTCCCTTTTAGAACTCTGCCACACACAGATAAAACCTTATAACA  
AGCTACAAAACCCGTTATTCAGACGCGGTAATGCCTAGTTTTTTTTGCCAGTATTCAGATGACAAAGAAACCCCTTATCCACTTC  
CCGTTTACAAGGTGAATGATTGTGGCTTCATGCCCTTTAACAGAGTGGGATTAATACTCACGCTGAATGATATGCGTCTCTCCA  
TCATTTCCCGTCACGGCAATTAGGCCCTCTGTAGAACAGGGGTTGATACTACTAATGTTGGTGTGTTTTCGTTTTGTTTCAGC  
ATCGCTGATCCTCAAATATCGTTTTGTGTTACGTTGCGCTTTGCGCTGGATAAGCGACTTAAAGAAATCCGACGCCTTCAGA  
ATATCGCTATCCTGGAAGTCGGGAAATGTGCTTCTGTGACGCTCCTGCGCCGTACCTGCCCGTATAACGGTTTTATCGCGGATC  
ATCGTTGCTTAAACGCCATCAGCCTGTTTTTTGCTGAAGGAGTGCCGAAATAATCGCGTATTGGCCGCGCTATCCTGATGA  
ACAGAAGTATCCAGCGATGATTACCCTGTTTACGATAGTGGTGATAGATTTGCTGGCCGTAGCGCTCCTGATCGGAATTACGG  
TAATCGAACATTAACAGTTCAAAAGCATTAAACCGATCTGGCAATTGCCAGGCGGTAGGGTGTGAAGTGTGCTAACATAGT  
TTCCCTGAGCGTGACAGTCACGATAAGGCGGGCTTTGCCCGCTGGTTATCAGTTAATCAATGGCACGATAAATACGATTCT  
GGCTTTGCTTCTCCAGCGTATTAACGTACTCCCGCAACAGGTGATACCGGTTAGCCATCGTTTTCGTTTCAGTTTCGGCTTTGCCTT  
CTTCATATGCCAGGCCGAAAAGTAACTGTAGGCATACAGACAAACAATAATCCCTACTTCGCGCGCGCTGCATTACCTTCAA  
AATAGTTAGGTAACGAGAGCCAAAGAGGTTGGGGCGCTTCATAAAAAACGCGCCATTGCTGGCCTGAAGGTATTCCCAATA  
CCCTCCCTGGTAGTCTTTAGCGTAACGATTACAGAAAGGACTGAATGAAGTATGCTGCGCTGAAGAAAGCGCCACGAAATGCC  
GCAGGCATGAAGTTCATGCGGGCGTTTTTACGAAATGTAGCGGGCGGTGATTTGATAGTTTCCATGATACTTCTCTTAAAGC  
CGATAACCGCGATGGTTAAGCGGCAGGCACATCACCTGCCACTTTTTAATTATCGTACAATGGGGCGTTAAAGTCAATATAAGT  
ACGGATTATATTTACCTAATTTTATGCCCGTCAGAGCATGGAAGGCGACCTCGCCGACTCCACCGGACACCGGGGGCAAATC  
GCCGAAACTGCGGGACTGACCGGAGCGACAGGCCACCCCCCTCCCTGCTAGCCCGCCACGCGGCCGTTACAGGG  
GACACTGAGAAAACAGAAAGCCAACAACACTATATATAGCGTTCGTTGGCAGCTGAAGCAGCACTACATATAGTAGAGTACC  
TGAAAACCTTGCCAACCTGACCATAACAGCGATACTGTATAAGTAAACAGTGATTTGGAAGATCGCTATGAAGGTCGATATTTT  
TGAAAGCTCCGGCGCCAGCCGGGTACACAGCATCCCTTTTTATCTGCAAAGAATTTCTGCGGGGTTCCCCAGCCCCGCCAG  
GGCTATGAAAAGCAGGAGTTAAACCTGCATGAGTATTGTGTTGTCACCTTCAGCAACTTACTTCTACGGGTTTCTGGCTC  
GTCAATGGAAGATGGCCGCATCCATGATGGTGACGTAAGTGTGGATCGCTCGCTGACGGCCAGCCACGGCTCAATCGTA  
GTCGCCTGCATCCATAATGAATTTACCGTGAAGCGGCTACTGCTGAGGCCAGACCCTGCCTGATGCCGATGAACAAAGATTT  
TCCTGTGACTACATTGACCCGGATAATGAGAGCGTTGAAATCTGGGGAGTGGTTACGCATTCCCTTATCGAGCATCCGGTATG

TTTGCCTGATTGATGTCAATGGCATGTACGCCAGCTGTGAGCAGGCATTTAGGCCAGATCTGGCAAACCGAGCAGTGGCCG  
TTTTATCCAACAATGACGGCAACATTGTGGCCCGTAATTACCTGGCGAAGAAAGCGGGCCTGAAAATGGGCGATCCGTA  
AAAGTCAGACCCATAATCGAGCGTCATAACATCGCTATTTTTAGCTCTAATTACACTCTCTATGCCTCCATGTCCG  
CGGCCGTAGTTGAGTCCCTTGAAGCCACGTGCAACAGTATTCAATCGACGAGCTTTTTGTTGACTGCAAAGGGATAACGGC  
CGCCATGAGCCTTGACGCTTTCGGGCGCCAACTGCGCGAGGAAGTCAGGCGACACACAACGCTGGTATGCGGGGTCGGTAT  
TGCCCGTACTAAGACGCTGGCGAAGCTGTGTAACCACGCTGCAAAAACATGGCCCGTACTGGCGGGGTGGTTGCTCTGGA  
CGATGGCGCCAGACTGAAGAAATTAATGAGCATCTGCCGTTGCGGAAGTCTGGGGCGTCCGCCATCGTACAGAGAAAGC  
ACTCGCCACAATGGGGATCAAACGGTGTGATTAGCCAGGGCAGATACGCGCCTAATCCGTAAAACATTTCGGCGTTGTG  
CTTGAAAGAACGGTACGGGAGTTGCGCGGCGAGGCTTGCTTCAGCCTGGAAGAAAACCCCTCTGCGAAGCAGCAGATTGT  
TGTGTGCGCTCATTTCGGCCAACGCGTAGAAACCCTGACGGACATGCAGCAGGCTGTCACCGGATTTGCAGCGCGCGCAGC  
TGAAAACTGCGTAATGAGAGGCAATACTGCCGCGTCATAAGCGTCTTTATCCGTACCAGTCTTATTAGTGCGTGATACACA  
GTATGCCAATCAGGCAACCGAAAACTGACGGTGGCAACCCAGGACAGCCGACGATAATTCAGGCAGCACAAGCCGCGCT  
GGCGCGGATCTGGCGGGAAGATATTGCGTATGCAAAAGCAGGGTTCATGCTGGCAGATTTTAGCGGGAAGGAGGCCAGC  
TTGATTTATTCGACTCTGCTACGCTTCAGCTGGCAGCGAGGCTTAAATGGCTGTTCTTGATGGTATAAACCGGCGTGAAAG  
AGCCAGCTTTTTTTGTCAGGCCAGGGCATCGATAACTCCTTTGCCATGCGTCGTGATGTTGTCACCTGATTACACGACAGA  
CTGGCGCTCAATACCAATAGCCACCATCAATAATTACCGGCGCCGTACACGGGCCGTTAACCCCTCAACCGGCCGAAACAA  
GTTTCGGCACGGTTTTCGCGGTTTTCGGTAAAAGCCGTTTTCTCTGTATAAAAGATCAGCTAAATTATGTGTATTGCACAATACAT  
ATATGTGAGGTTAGCAGTGAATTTGCCTACGCCCAGAACCTACGATGAACCTCAGAGAGCCTACGATTTTTTCAATGATAAGCT  
ATCAGCAACGAGCTGCCGCCATGCCTGATAACGTTGCAGCGTGAGAAGCGAACGTATGGCTATTGTTCTTTAAGCGTTTTCG  
TCGGCCGTGAGAGTGGGTACACGGTAGACGAGATCGCTATGAATCCGGTGTATTTCTCGATCAGAACCATAAAGGCCACGCTT  
TCAACTGTTGCATGAGATGGTTCATCAGTGGCAATTCCATTTTGGCGAGCCTGGCCGCCGTGGCTATCACAACAAACAGTG  
GGCGGCCCGGATGGAACGGGTAGGACTAATGCCTTCTGATACCGGCGAACCGGGAGGCAGGAAAGTGGGCCAGAGCATGA  
CCCATTATATTATTGCCGGTGGCCCTTTCGATATGGCCTGTGATGAACGCTGACAGGCCATTTCCGGCTTTCCTGGATGGACA  
GGTTTTCCGCTTACCAGCCTAAGCCTGGCGCTGTGCTAAGCCCTACAGGAAAAGGCTATATTGACGACGAGGAAGATGATAG  
CGAACACGAACAGGAGGTGGAGGAAGGGCGCGACCCGTTGAACTCGACGACGAGATCATAGAGGCCATGCGATTTGTAA  
CCCCACCGCTGAAGCACCGGTGAACAAAACAAACCGGGAAAAGTACAGCTGCCCGGTGTGTCATATCAATCTCTGGGGTAA  
ACCGGGGATAGTGGTTTACTGTGGTGGCGAGCACTGTAATAAAGCCGCTTAGTAGTCTTAAATAAAGTCCTTTCCGACTTT  
ATTTTTTTTCCATTTCCGAGGTGCTGATGTTAATGCTGTACTTCGCGGCTTCTTTTAAACAGTTTCAGCAAGGCTTGCTGG  
TATCCAGACCTGAACTAATTTAATGGTTCGCCGTTCTCGGCTTTAAGAGTGGTGTCTGGTACAAATCCCAGATTCGCTTAA  
GGTGCTGGAAATGTTTTGCTTGGAACGGCCTACTCGCATGGCTACGCTGATGATTTCTCACCTTTGACAAGCACGGAATAGC  
CAATATCTGTTGTGATGTGTGCAAAGGAAGCCATTTGCGGCAGCAGCTGTTTCCATTCTGTTTCTGAAATTCTGTTTTTCTGAG  
CCATCTGTGGCGCCTCCGTAGTTTTGGTTACAGAAAGGATATACTCAGAATAAACAGGGTCAATACAAGTACGATTTTTATAA  
ACTTTATTTTATTTGAGGGTGAAGCCCGGTGCGGCAGCAGCGCGGGCCTCGATGGTGCCGCGAAGGTGCTGGCGCCATGCT  
CGGATTAACATGAACCGTGAAGAACTGCGAACTTGTTCGCGGTTCTGAGGGGTTGACCGAGCCGCGAAGCGGCGCT  
GGTAAGCGATGATATGCACATATCCACAGGCATATTTTTAAAAGGTATTTTATAGATTTTTTATCTTTTTAAAGTCTTTTAGAGCT  
ATATAACTCATTGATTTAAAATCATAATAAGTGTATCTCTGGGAATCCGCCACCTTGTATGGGAATTGGCCACCTTACTAT  
GGGAAACAGCCCACCTTACTATGGGAATTAGCCCACCTTGTATG

>pQEB1\_inv1\_inv2

GGAATTGGCCACCTTAGACGAAACTGTAAAAAATGTATTTACTTGTGGTGGTGGAGAGTAATTTTTAACC  
CACAAAGGCAAGGCGCATGGATAAGTTGCTGAACAAAAGATAAAAAGTTAAGCAGTCTAACGAGCTTACCGAAGCTGCTTAC  
TACCTCTCGCTAAAAGCAAAGCGCGTTCTCTGGTTATGTCTTATGCAGACGATTTACAGCTTCAGTAAGCGAAGATGATGAT

GAGATGGCTGTACTCGGTGACTCTACTTTCAAAGTAAAGGTGGCTGACTATCAGCAAATTTTTTCAGGTAAGCCGTAACCAGGC  
TATCAAGGATGTTAAAGAAGGCGTGTGTTGAGTTAAGCCGTTCTGCGGTAATCTTTTACCCGAAAGAGGGGCGTTTTGACTGC  
GTCGCGCGCCCCTGGCTAACAGAGGCTGGCAGCCGATCAGCTCGTGGTATCTGGGAAATCGAATTTAACATAAACTCCTGC  
GGTACATTTACGGCCTGACGAACCAGTTCACCACCTACTCGCTCCGCGATTGTGGCAGTCTTCGAAATCCCCGGACGATCCGC  
CTTTATGAAAGTCTTGCTCAATTCAAATCTTCAGGCTTATGGGTTACTACTCATGCTTGGTTAAATGACCGTTTTCTTTTGCCGG  
AATCCCAACAGAAGAAGTGGCAGAGTTGAAACGATCTTTCTTGATCCTGCACTCAAGCAGATAAATGAGAAAACACCTTTA  
CTTGCTAAGTATAGTATTGATGATTCAGGAAAATTTCTGTTCTCAATAATTGATAAGCAAATCCCGTCTGACATAAATCAGCAC  
ACATGAGCCTGTCATTTGACAAAATTTTTGTCATGAAGATGGGCGAATTTCCACACAGCACCCGGCGCCCGGCAAGATGGGCGG  
ATTCCCACACGACAGCGGCGCCCGGCAAGATGGGCGGATTTCCACACTACAGCGGCGCCCGGCAAGATGGGCGGATTTCCA  
CACGGCAGCGGCGCCCGGCAAGGTGGGCGGATTTCCACACGGCAGCGGCGCCCGGCAAGGTGGGCGGATTCTCACGCGG  
CAGCGGCGCCCGGCAAGATGGGCGGATTTCCACACGGCAGCGGCGCCCGGCAAGGTGGGCGGATTCTCACGCGGCAGCG  
GCGCCCGGCAAGGTGGGCCGATTCCACGCGGCAGCGGCGCCCGGCAAGGTGGGCCGATTCCACGCGGCAGCGGCGCC  
CGGCAAGGTGGGCCGATTCCACGCGGCAGCGGCGCCCGGTAAGGTGGGCGGATTTCCACACGGCTGCCGCGCCCGGCAA  
GGTGGGCGGATTTCCACACGGCAGCGGCGCCCGGCAAGGTGGGCGGATTCTCACGCGGCAGCGGCGCCCGGCAAGATGG  
GCGGATTTCCACACGGCAGCGGCGCCCGGCAAGGTGGGCGGATTCTCACGCGGCAGCGGCGCCCGGCAAGATGGGCGGA  
TTTCCACACGGCAGCGGCGCCCGGCAAGGTGGGCGGATTTCCACACGGCAGCCTCGCCCGGCAAGGTGGGCGGATTCCCA  
CACGGCAGCCTCGCCCGGCAAGGTGGGCCGATTTCCACGCGGCAGCCTCGCCCGGCAAGGTGGGCGGATTCCACACGGC  
ACCGGCGTGCAGCAAGGTGGGCGGATTCCACACGGCACCGGCGCGGCAAGGTGGGCCGATTCCACACGGCACCGG  
CGCCCGGCAAGGTGGGCCGATTCCACACGGCAGCCGCGCCCGGCAAGGTGGGCCGATTCCACGCGGCAGCCTCGCCCG  
GCAAGGTGGGCCGATTCCACGCGGCAGCCTCGCCCGGCAAGGTGGGCCGATTCCACACGGCAGCGGCGCCCGGCAAGG  
TGGGCGGATTTCCACACGGCAGCGGCGGGGCCAGTGGGATTAGGAGAATAGGTGTTTTACCGAATGCCCTGACGAGG  
CGTAAAAAACCGCTTGCGGCGGCCTCATAAAGCAGAAAACCCGCTCAAGGCGGGTTATCTGCTCTGTAGCCTGTGATGCT  
TCGCGGGCATCCGGCATAACAGCGAGGTGAAATCTTCTTTTGGCATGTTAATTATACGTTAAGCGGGCATATGATCAAACCTG  
TATTAATAAGCCACTGTACCGTTTATAATGCTCTCAGATCAAAGAGGTAAGCCCGTTTAGCCGCTGTGTGATGAGCCAGTT  
CAGACTCTTCAAATCGAATTTGGTACTAAACAGGACCCGAACCGTGGGCAAGCACACGGCAACGGTATAGCCCTCTTCCGG  
TTTCGCACCCGGAAGCCTGGGCGGCAGCGTGGTGAATTTCTTTTGGTTAAGTGAATGGCATAACCGGATGGGCGGATTA  
GAGGAAAGGGGATTGCCTAGTAACCTACGCGCCACAGAGATGGAGGTGCGGGGAATGATTGAGCTGATTATCGCTATTCTGA  
CCTTAATTGCGGCTGTATTGCAGTTGATCAACTGGTTCTTTAATGGTGCCGGAGTCTGTGAAGGTGAAAGCCTGAACGGGC  
AAAAGTAAAGGTTTATAGCCGTCCTTCGGGGCGGCTTTTTTTTCGGCAAATAGGGTTTTACCGAATAATGCAGAGTTTTAA  
GGTGAGAATTTGCAGACTTGCGTTTTACCGAACATAGATACTCCCTAGGCTGATAGGTGCATTAGTTATCACCTACCTGAAC  
ATATTGTAAGATGTCAGTCTCCAGTACTTGTGTACTATCAACTGACAAGACTCTTACACGCAACGCAGGGGGATGGAGTT  
TTATGCTTAGAAAAATAATCAGGGGTAGCGGATTAAGTCAAGTCAAGAAAAACTGATAGAGTTCGCTGATGATGCTTTTTTT  
GGTCTTTGGTCTTATCCTAATGTTTATAGCGATGAGGGTTACTCTAAAAATAAAATTGGGAAAGAAGTTAGTGACTTATTAGTTA  
TTTTTGATAAAGATATAAATTTTTTCCGATAAAGCTATTACATAAATAAAACAAGATCCTAAGGTTGCATGGCAGAGATG  
GTTTAAAAAATCAGTCATACAGTCTTGACACAGTTATTTGGCGCAGAGAAGTTTATAAAGATCATCCCGAAAGACTTTTTGT  
TGACAAAGAATGCTCAGTTAACCTCCCATTAAATAGATAATTCTTTAATTTTCATTTGGTGGCCGTCATAATAATTTTCAG  
ATCCGGCGATCTCGTACTTTGACAAAATAGAAAAAGGCAGCTCTGCTACTTTAGTTAACATATTTCTTTAAACGCCCATCAATG  
TCTAGAAAATCCATTTTGTGTCGGAGACGTTTATCCTGATAAGACTTTTGTCCATATACTTGATGAGACTGCCCTAAAACACTG  
TTAACCGAGTTAAACACAGCAACTGATTTTATTGGCTACCTAACGAAAAGAGAGGGTTGTAAGAGAAAGAACATTATTGG  
TCAGCGCTGGGGAAGAAGAGACTCTTGCTGCTTACATTATGGGTGATAAAACCATAATATAAAGAAATATTGGAAACGAT  
CAAGGGATGACCATAACCGAAGGTGAATGGAAAACTATAAAACCACTTTCAATTATCAATATCAGCTCTCAATGAAAAAGGG  
TAGCGTTTTCTGGGATAACCTAATCCACAATTTCTCGACAAGTATATTGTCAGCTAACGTTGGTTTTTTTAGTGAAATTTGAATTT  
TCTACACATGAATTAGGTGTTAGAGAATTAGCCAAAGAAAGTAGGCAATCTAGATATTACCTTTCAAAGAACTTTAAAGAGAA  
ATAAAAACAACCTCAGCCTCATCTAAGAACGTCAAGAATGGTCAATCAATCGATGAGCCTGGAAAGTTTTACTTATTCTTTTT  
TTTTCTAACGATAGCAAGTTGAGTTACTCTGATTACAGAATTAACGTATATCTTATATAAATGCTTATGCTGAGGTTGCCTTTA  
ATAAATACAGACATATTAATAAATAATTACTATTGCAACAGAGCCGCAAATACAGAAGGAAGATCTGAAGACCTAATATATA



GCATATCCCCAGAGAAATTTACCAAAGAGCAAATGAAAAAGCCAAAAGATTATCAAGAGAATACAAAATACTAAGTGATTTT  
TTACCTACTAAAACGACAAAGAGCGATAACTTTAAATCAGTTATATCAAAGGTGAAAAAATAGGGCGGAATACACCTTGTCC  
ATGTGGCTCCGGTGTTAAATTTAAAAAGTGCCATGGTGCGAATAATTAGCATTATTGTATGTATAACGGTAATGGCGCGGCAGA  
GAAACCGGCGCGTTCTGCCCTAGTGTGGCCTGCGGGTTCCCCCGCACCCGCTGTATGTAGTATCGGCAGCATCTGAGAAAA  
CCACTACATGTAGTTATCAGCGCCACAACGGCGCGGGGACGAGTGCGGTTCGGAAAAATTGGGGTTTTACCGAATCCGGCA  
AAAGATTGCTTCTATAACGTCCGCTTCTGGCACACAGCAGCCGTTAAGATGTAAGGCCTTACGCCAACTAAATCTAATGGGA  
CAGATTTAGTTGGTGATGGTCAAGTAATCTGCAAACGGTCACCAAGTAAAATGCAAATGGGTAGTCAAGTCCGATGCAATTAC  
GCACCCGCAAGGTGGGCCGATTCCACACGACAGCAGCGCCCGGCAAGGTGGGCGGATTTCCACACGGCAGCGGCGCCC  
GGCAAGGTGGGCCTATTCCACACGGCAGCGGCGCCCGGCAAGGAGGGCCGATTCCACACAGCACCGGCGCGCGGCAA  
GGTGGGCCGATTCCACACGACAGCAGCGCCCGGCAAGGTGGGCGGATTTCCACACAGCACCGGCGCCCGGCAAGGTGG  
GCCGATTCCACACGGCAGCGGCGCCCGGCAAGGTGGGCCGATTCCACACGGCAGCGGCGCCCGGCAAGATGGGCGGAT  
TTCCACACAGCACCGGCGCCCGGCAAGGTGGGCCGATTCCACACGGCAGCGGCGCCCGGCAAGGTGGGCGGATTCCAC  
ACGGCAGCGGCGCCCGGCAAGATGGGCGGATTCCACACGGCAGCGGCGCCCGGCAAGATGGGCGGATTTCACACGGCA  
GCGGCGCCCGGCAAGATGGGCGGATTCCACACGGCAGCGGCGCCCGGCAAGATGGGCGGATTTCACACGGCAGCGGC  
GCCCGGCAAGGTGGGCCGATTCCACACGACAGCGGCGCCCGGCAAGGTGGGCCGATTCCACACGACAGCGGCGCCCGG  
CAAGATGGGCGGATTCCCATATCGACATGTATGTAGCTTGTGTTATCCGTGGATTGTGCAGCTCAGCGGGTTCGTTGTCTG  
GCGTAGTGTCCCCGTAACCGGCCGCTGCGGCCGCTAACCGCGAGTACGCGCCGCGACCCGAAGGCGGGCCGCCGTTCC  
CGCGCGCAGGCGCGCGGCCACTGCGCACCCCGTGGGGACGTGCGGCAGCTGTGTGGCGGTGAGCGGGATTAGGG  
CTTTCAGGGAGGGGGCTGGGTTCGGGCGATACGTTACGATTGCGGTTTCCGGCGATTTCGCGCCGGTGCCTTTAACTC  
CGGCGTGGTTCGCTTCCATGCCCTGACGGCATAAGAAAATAAAACCGCCATGCTGCGGTTCATTATGATTTTGTGGTGTAGCG  
ATAAATAGTCATGCGAGAAACGTTGAAGCGCTTAGCAACTGCACCAACTGTCATTTACAGGATCAGCAAGTAAGATTCTAATTT  
GTTTAACATCTTCTCAGAAAGTGACGGTTTTCTCCCTCCACACGGCCCTTGCGCGTGCAGCTGCAAGGCCTGAGCGCGTT  
CTTCAATATTGCGTTGCGTTCAAAGCTAGAGAATATCGCCATCAGATGAGTATAGATTTCCCTATAACTGGCGCATTTGTGT  
CTATTCTGCTTGTATGGCTATGAAAGTTATTCCGCGTTTTCTCAGGTTGTCGAGTAAAGTAATGACTTGACCCAATGAACCACC  
GAGCCGATCTAGTGCCCAAATACTAGGGTATCTCCCTCGCGCAATGCTTTCAGGCAGTTCTCCAGTTCCAGCGCACTTTTTT  
GTCGCGCTTTGGGCCGCTACGTGAGGTCTGATCCTGATAGATTTGCTCACATCCAGCTTTTGTAGTTTCGTAACCTGGTGC  
CACATCCTGAAGATGCGTAGATTTACGGGCACTGTTGCAAATAGTCCGTGGTGATAAACTTATCATCCCCTTTGCTGATGGAG  
CTGCACATGAACCCATTCAAAGGCCGGCATTTCAGCGTGACATCATTCTGTGGGCCGTACGCTGGTACTGCAAATACGGCAT  
CAGTTACCGTGAGCTGCAGGAGATGCTGGCTGAACGCGGAGTGAATGTCGATCACTCCACGATTTACCGCTGGGTTACGCGT  
TATGCGCCTGAAATGGAAAACGGCTGCGCTGGTACTGGCGTAACCCTTCCGATCTTTGCCCGTGGCACATGGATGAAACCTA  
CGTGAAGTCAATGGCCGCTGGGCGTATCTGTACCGGGCCGTCGACAGCCGGGGCCGCACTGTGATTTTTATCTCTCCTCCC  
GTCGTAACAGCAAAGCTGCATACCGGTTTTCTGGGTAAATCCTCAACAACGTGAAGAAGTGGCAGATCCCGCGATTATCAA  
CACGGATAAAGCGCCCGCCTATGGTGCGCGCTTGTCTGCTCAAACGCGAAGGCCGGTGCCCGTCTGACGTTGAACACCGA  
CAGATTAAGTACCGGAACAACGTGATTGAATGCGATCATGGCAAACGATAATCGGCGCCACGCTGGGATTTAAATC  
CATGAAGACGGCTTACGCCACCATCAAAGGTATTGAGGTGATGCGTGCACACTACGCAAAGGCCAGGCCTCAGCATTATTATG  
GTGATCCCCTGGGCGAAATGCGCCTGGTAAGCAGAGTTTTTGAATGTAAGGCCTTTGAATAAGACAAAAGGCTGCCTCATC  
GCTAACTTTGCAACAGTGCCCTTTTAAAAATATGCCTGTGGATATGTGCATATCATCGCTTACCAGCGCCGCTTCGCGGCTCG  
GTCAACCCCTCAGAACCAGCAAACAAGTTTTCGCAGTTCTTACGGTTTCATGTTTTAATCCGAGCATGGCGCCAGCACCTTCG  
CGGCACCATCGAGGCCCGCGCTGCTGCCGACCCGGCCCTACCCTCAAATAAAATAAAGTTTTATAAAAATCGTACTTGTATTG  
ACCCCTGTTTATTCTGAGTATATCCTTTCTGTAACCAAACTACGGAGGCGCCACAGATGGCTCAGAAAAACAGAATTTCAGA  
AACAGAATGAAACAGCTGCTGCCGCAAATGGCTTCTTTGCACACATCACAACAGATATTGGCTATTCCGTGCTTGTCAAAG  
GTGAGAAATCATCAGACGTAGCCATGCGAGTAGGCCGTTCCAAGCAAACATTTCCAGCACCGTTAAGCGAATCTGGGATTT  
GTACCAGAACACCACTCTTAAAGCCGAGAACGGCGAACCATTAAAATTAGTTTCAGGTCTGGATACCAGCAAGCCTTGTGAA  
ACTGTTTTAAAGAAGCCGCGAAGTACAGCATTAAATACATCACGACCTCGGAAATGGAAAAAAATAAAGTCCGAAAGGAC  
TTTATTTAAGACTACTAACGCGGCTTTATTACAGTGCTCGCCACCACAGTAAACCACTATCCCCGGTTTACCCAGAGATTGAT  
ATGACACACCCGGGCGAGCTGTACTTTTTCCCGGTTTGTGTTTGTTCACCGGTGCTTCAGGCGGTGGGGTTACAAATCGCATGGCCT

CTATGATCTCGTCGTCGAGTTCAACCGGGTCGCGCCCTTCTCCACCTCCTGTTCTGTTCTGCTATCATCTTCTCGTCGTCGAAT  
ATAGCCTTTTCTGTAGGGCTTAGCACAGCGCCAGGCTTAGGCTGGTAAGGCGGAAACCTGTCCATCCAGGAAAGCCGGAA  
ATGGCCTGTCAGCAGTTCATCACAGGCCATATCGAAAGGGCCACCGGCAATAATATAATGGGTCTGCTCTGGCCCACTTCTCT  
GCCTCCCGGTTCCGCCGTATCAGAAGGCATTAGTCTACCCGTTCCATCCGGGCCGCCACTGTTTGTGTGATAGCCACGGC  
GGCCAGGCTCGCCAAAATGGAATTGCCACTGATGAACCATCTCATGCACCAGTGTGAAAGCGTGGCCTTTATGGTTCTGATC  
GAGAAATACACCGGATTCATAGCGATCTCGTCTACCGTGTACCCACTCTCACGGCCGACGAAACGCTTAAAGGAACAATAGCC  
ATACGTTTCGCTTCTCACGCTGCAACGTTATCAGGCATGGCGGCAGCTCGTTGCTGAATAGCTTCTCATTGAAAAAATCGTAGGC  
TCTCTGAAGTTCATCGTAGGTTTTCGGGCGTAGGCAAATTCAGTCTAACCTCACATATATGTATTGTGCAATACACATAATTTAG  
CTGATCTTTTATACAGAGGAAACGGCTTTTAGGGGTTGTTTTCGGGAGAGGGCGAAATCCTACGCTAAGGCTTTGGCCAACG  
ATATTCTCCGTAAGATTGATGTGTTCCAGGGGATAGGAGAAGTCGCTTGATATCTAGTATGACGTCTGTGCGCACCTGCTTGA  
TCGCGGCCGCGATAGCTAGATCGCGTTGCTCCTTCTCCATCCGCGTTCCAAGCTGCGGAAAGGCACCCATAAGCGTACGCC  
TGGTGAGCAGGCGACGCGGATCGACGTCAGCGCACGAGAGAATGCGTCCGCCATCTGTGCAATGCGTCTAGGATCGAGA  
CAAAGTTGTCTCTGTGTCAGCCGGATCGTAGAACATATTGGCGGCGCCAAAGCCCACTTACCAGACCAGACCGACGGGATCTA  
TCACCAGCCAGCCGCGACTGGAGAACATGATGTTTTCATGATGCAGATCGCCATGTAGCCCACGCAGTTCCGAGGCATTGCTC  
ATCATTGATCGGCTATAATCGCCGCGTGGACGTAGTCAGTTTGACAACCTGCGTTTTGATCATCGCGCGCCCCGCTGAAACAA  
AGCTGCAAAGCGATCCCGATCGGGAGAAGGGCAGAAGGCAGGGGTTCTCAGATGCGGCATACAGCTTCGCCATTAGTTC  
CGCTGCAATTTGCGTTCGCTGCTGTTAGTTCGCGTTCGCGAACGATGTGAGAGAGCATTGCTCCCCGGCATATTGAGCAAC  
ATCAGATTGTTCTCACGACCAGCAACCGGACTGCTCCCCTCCATTGCGCCATACCAGATAGTGGCCCCGCGCAGTTCATC  
AGCAATGTCTTCTATAGTTTTCAATCCCTTGACGATTGCAGGAGTCCCGTCTGGCAATGAACTTTCCAAACGAGGCTGGAAA  
AGGTGTCCGCAATGAGAACAGGTTGCGAAACGTGCCAATGAGCAGGAAAAACAGGGCGGCATGAACATCAACCCCAAGTCA  
GAGGGTCCAATCGCAGATAGAAGGCAAGGCGTTTCGCGGTTCGGGGCTTCGATCCCCAATACATTGAATAGGACAGCGAAGG  
CGCGCTCTGCTTCATCTGGCGCTGCCAGTTCTTTCGGCGTTAGCAATCATGAGTGCCAAATCGGCATAGCGATCTGCTGTT  
CGAGCCGCCAAGGTGATCAGACCCGTGCATTGAAGAGTTTTAGGGTCCACCATGAAGTTCGGCATGCAGGGATCACCATG  
GCAAACAACCATATCGGTGCGCTTTGGTTCGAGCCGACCCGGTAGTCTCTGTTTCGACACGAGCCAAAAGATCGAGCTGCGGC  
GTACTCTTGTCTCGTCCGGTAAGAAGTCGGGATTGACGGCATTGCGGGACACCACATCAACGGCGCGTCCGAACATTGCG  
ACAGCCTGCGCTCAAACGGACATTGATCAACCGATAGGCTGTGAACAGCGCCAAGTTGCTGCCCCATTGACGGCCACGCTTT  
GAGCAAATCCGCTCCAGACAGATCAGCCGCCGTACTCCCAGAAATTGCCGTTATACCAAGCATGCACCCTCCTGTTCTCCT  
GCCAGTTGATCACCTCGGGGCAAGCCACACCTCGACCTTTGAGCCAAATGAGGCGGTACGCTCTCCAGCGAGCTCACCCG  
GGCGGGAAGCAGGTGCGATTTTCGCGAAGGCATGCCCGTACCACGTGAAAAACAAAATACCAGATTCTCCGCCTCTGA  
CAGGCAACAGTCAGAAATGCGATTACCAAAAAAATATTAGTTTCGATTCAATGGAGGTTCTTTCAGTTTTCTGATGAAGCGC  
GGAGGTGGCTCAACCTGCGAAAAGAAACGAGTTGCTACGTAAGTCCGAGAACATGCTTTCCATGGTCTCTGAGCTGCGCTT  
ATGCCCCGAGGCATAGACTGTACAAAAAACAGTCATAACAAGCCATGAAAACCGCCACTGCGCCGTTACCACCGCTGCGTTC  
GGTCAAGGTTCTGGACCAGTTGCGTGAGCGCATACTACTTGCATTACAGCTTACGAACCGAACAGGCTTATGTCCACTGG  
GTTTCGTGCCTTCATCCGTTTCCACGGTGTGCGTCACCCGGCAACCTTGGGCAGCAGCGAAGTCGAGGCATTCTGTCTGCTGGC  
TGCGAACGAGCGCAAGGTTTCGGTCTCCACGCATCGTCAGGCATTGGCGGCCTTGTGTTCTTCTACGGCAAGGTGCTGTG  
CACGGATCTGCCCTGGCTTCAGGAGATCGGAAGACCTCGGCCGTCGCGGCGCTTGGCGGTGGTGTGACCCCGGATGAAGT  
GGTTCGCATCCTCGTTTTCTGGAAGGCGAGCATCGTTTGTTCGCCAGCTTCTGTATGGAACGGGCATGCGGATCAGTGAG  
GGTTTGCAACTGCGGGTCAAGGATCTGGATTTGATCACGGCACGATCATCGTGCGGGAGGGCAAGGGCTCCAAGGATCGG  
GCCTTGATGTTACCCGAGAGCTTGGCACCCAGCCTGCGCGAGCAGCTGTGCGTGCACGGGCATGGTGGCTGAAGGACCAG  
GCCGAGGGCCGACGCGGCTTGCCTTCCCAGCCTTTCGAGCGAAGTATCCGCGCGCCGGGCATTCTGGCCGTGGTTC  
TGGGTTTTTTCGCGCAGCACACGCATTCCGACCGATCCACGGAGCGGTGTGCGTGCATCACATGTATGACCAGACCTTTCA  
GCGCGCCTTCAAACGTGCCGTAGAACAAGCAGGCATCAGAAAGCCGCCACACCCCTCCGCCACTCGTTTCGCGAC  
GGCCTTGTCCGACGCGTTACGACATTGCAACCGTGCAGGATCTGCTCGGCCATTCCGACGTCTCTACGACGATGATTTACA  
CGCATGTGCTGAAAGTTGGCGGTGCCGGAGTGCCTCACCGCTTATGCGTGCCTGCCCCCTACTAGTGAGAGGTAGGGCA  
GCGCAAGTCAATCCTGGCGGATTCATACCCTGCGCGAAGGCCATCGGTGCCGCATCGAACGGCCGGTTGCGGAAAGTCC  
TCCCTGCGTCCGCTGATGGCCGGCAGCAGCCGTCGTTGCCTGATGGATCCAACCCCTCCGCTGCTATAGTGCAGTCCGCTTC

TGACGTTCAAGTGCAGCCGTTCTTCTGAAAACGACAAACGATGTCAGCCAATAAGTTGTTGTAATAATCGACAAGTGTGGTTGTC  
AACTCGCCGTCCTGTAAGACTGCATTATCAGTTTGATTGAGGGCGGCTATGGTGTCAATTTATACACCATAAACCGATGACGGCT  
GCACGTAAATCTGTGGATGCTCTTGATGGCGATTCAACGTTTGCTGTCCCACGCATGGCGACAGCATTGTTTAGCCAGCAAT  
AATCCCATTATAAGTTGGGGAGGGGCTCCGACAACGCAAGCTATCTTTTCTGTATTGTTTTGGATGTCGTCCGCAAGAATG  
GTATTCTCGATCAGTTCTCGAGCCAATAATGATGTTTGAAGCAGACGGCCAACACCGTCTGCTTCGTTTCTGGTTCTTGTCT  
TCCACTGCCAGCGGTTACTGATTGTTACGCACGTAAGTAGCAAAGTGAATGCGCTCTTGAGTCTCATCAACGGTTGCCTCA  
CAGTCTCGCTGGCACTGGAATCAATGTGAAAATTGTTCTGGATCGGATCAACAGGAATAAATCGATCACAGTCGAACTCTTT  
GGAATTATGGTCATGTGCAGTTTCGTTGCTGATGAAAGAGCTTGAATGTACAACCTTCTCCCCACCAATGACAGCAATGCGTTG  
ATCGGTATTCTCATACAGTTGATCACAGCACGAAGATCAGGAACGACAGTAGCGCCTATGACATCTTCTGTTTTAACGTCGA  
GGAGATCACGAACGATTGCGGTTGCGGGAGAATTCCTTTCTCCTTGATTGCTCCTCGGCGCCATCCTTTTCTAACTGCATGTC  
ACGCATGTCAGTATACGTGTGTTTTCCCATAACGCACACGCGGATCTCTTTAGAAATCCGCGTAAATCGCGCCATGTCTTCTTG  
CATTCCATGGAATCTTGCCGCTTTCCCGAATCCCAACTTGAATCCACAGCGACTATTAGCTCAAGTTGTGGGTGACTCATT  
AAAACCTCAAACAGTCGATGCTGTTGTTCCAGATATTGCTTACGGAAGGTGGCCAGATCAATCAGTTTGATATTGCCTTTC  
CGCTGTTGTTGAGATCGTGCACTTTCTTCAATTTGCCGGAAGATCCGGAAGTGGATGCCGCGATCACCATGGTGGTCTTCGAC  
GAGACTGATGATTGCACTTCACCACCCTCAGCTTCAATCAGCTTCTCCAAGGCCGCGTCACGAAAACCGGTGATCACGATCTT  
CTCACCGGTAAAACGATCCCCGAAGTGACCTGCTGTTTGAACCCGATGATTGATTGAATCTTGTGTAATAGCTCGGCATGTT  
AGCCATACCTGCAAGCACTTTTGCGGCAGTTTTGTAGCTGAATTTGTGACGCTAACGATCTGCTCTTCGGTGATGGCATTGA  
AATCATCCAAGTCTTAATATCCAAGCCTTACACAGAGCTTTCATCTTGCGGCGCCCAACGCCGCGCCAAAGTGGGGCATC  
GACCCCAACCAACCGACAGGGGAACACTACTGGGTATAGGAAGTATAAACACCTTTTTGCTCCTCATCCGAAGTATCTTAC  
CTGAAATTCCTCACTCGTTTACCGCTCAAGCCCAATTTAACTGCCGGTCCAGCCTAAACCGCTCTAATAAGGTTTCGATTTG  
GCGGTAAAATCTCTAGCCTGATAGCTCGAGAGATACAAACGCCCCACCGCCCCGTTTAAAAGTTGGCAGTGTGAGCAGTG  
TTGGATTTGGGGTCGTACAGTCAAAGAGACGACTCTGTGATGGATCGAACAGGCTGGGAGTCAAGTGGCGGCGCTCGTTCTGG  
TGGCAGCTCACGCTGCTTGGCGGCATTCGCTTGGCTGTTTTCTGTTTCAGATGCTTGAAGTCTGCTCAATGACCTTCGGATC  
TTCGATGCTGGCAATCACTTTGACGTGACCGCCGAGTGTTCGACACTTCAATATCAATATTGAAGACTCGCTTGAGGCGTT  
GCATCCAGGTCATGGCGCGGTGGCGCTCTGCAGGACTCTTGTACGCCAGTTAGTATCGAGACCTCCGATTTGTGGGCTTC  
TTGCCCCGCTTGGCGGGTGTACTTGAACCTCGGTGTTTGTGTTTCGGTGCAAAGACGCCGTGGAAGCGTGTGAGGTTGACTC  
GCGGCTTAGGTACCAACGCAGCGAGTTTGGCGATGAAGTCCAGCGGCTCGAAGATCACATGGGTGGTGCCATTGCGGTACG  
GAGTTTTGAGCTCGTAACGCACCTGCCATTGGCGGTTAATGCCAGACGTTTTTCTGAAACCGCTGGCCGACTAATGTAGCGA  
CACAAGCGCTCAAGCTTATCCCGCTGATGCGCTTCGGCCATCACACCGGCGTGTAGCGAGAAACAGCATGGTTGGCTACTC  
GACTGCTTGAGTGGCTTTATCCTCACGCCCTGGCAAGGTTTGCAGGGTGAAGACTTTGCGCCCTTGCTGGGGGCCGACGG  
CAATGCGATACGTAACCGAAGCACCATGTAATTGAGTCAGCGTATCGTCTTCGCCCTTCCAGTGTCAACCACGTATTCTCGG  
CATCACGCTCCAAAATCCCACGCTTTTCCATGCAGCGAGCGATGCGATGGCTGAGGGTGTGAGCGAGCGTATTAGCTCATCG  
TAAGTGGGTGCCTTGACACGATGGAAGCGTTGCTTGCCATAGTCATCTTCGGCATAGACACCATCGAGAAACAGCATGTGGTA  
GTGGACATTGAGATTTAGCGCGGAGCCAAAGCGTTGGATAAGAGTCACTGAGCCAGTTTGTGACAGAGGCTTTGGTGTAAAC  
GGCTTTTTTATGATCAGATGAGTTGAGAGTGTACGATAGACGATACTCAAGACCTGGCCATCAGCTGGGGATGGCGAGCCAGC  
AAAAAGCGTAGCTGGAAAGGAAAGCTGAGCACCCACTGGCGAATGGGCTCCTTGGGGAAGACTTCGTCTATCAGCAGCGCC  
GCACTCTCGGCCATCCGGCGGGCACCGCAGCTAGGGCAAAGCCGCGTCGTTTACAGCTGAAGGCGACCAGACGCTCGTGA  
TGACAATCCTCGCAGCGAACCCGCATGAAACCATACTCCAGACGGCCACATTGGAGGAGGTCGTTGAATCTTGTGGATGTA  
GCGAGGCAAGTGTGACCTTGGGCTTCGAGTGAGGCTTTGAAGGCTGGGTAGTGTGCTCAACCAGCTGGTAGAGCAGCG  
TCTGGTGGGTTGGTGGCGTTTCGTAACCGTTTGTGTTGAGTGGGCGATTGACTCGCCGTGGCGTTCTTGCCAGCGACATGGG  
TATCCTCCGCTGATACTGTGGTTATGTACAGTATCAGCGGCTTGCCTTACAGCTCCAGTCTGGCCCTAGACATCGCTAAATGCT  
TAACCCGCAATAGCCCTCACGAGTTGTTATCAGCCACTACCGGTTGAGCGAGAAGTTTTGGGTTTCAGGGTGCTATTGCTCCA  
CCAATCACAATACTGAAGCCCCAACTGTTATCAGTTGGGGCTTTTTCTTGTCTGTTTGCGGCGGTTGCGTTTTATCGGTAGTCG  
TCGAGCTCTGCACCATCCCACATAAGAGCTTAACGGTGCATCTTCAACGCCATCACACAAAACCTTTCTTTTTACGCACAGTC  
AACTTATTGGATGTTTTATTAACAACCCAAAAGGAGATATTTAGCGGGCGGCCGGAAGGTGAATGCTAGGCATGATCTAACCC  
TCGGTCTTGGCGTTCGCGACTGCGAAATTCGCGAGGGTTTTCCGAGAAGGTGATTGCGCTTCGAGATCTCCAGGCGCGTG

GGTGC GGACGTAGTCAGCGCCATTGCCGATCGCGTGAAGTTCCGCCGCAAGGCTCGCTGGACCCAGATCCTTTACAGGAAG  
GCCAACGGTGGCGCCCAAGAAGGATTTCCGCGACACCGAGACCAATAGCGGAAGCCCCAACGCCGACTTCAGCTTTTGAAG  
GTTTCGACAGCACGTGCAGCGATGTTTCCGGTGCGGGGCTCAAGAAAAATCCCATCCCCGGATCGAGGATGAGCCGGTCCGC  
AGCGACCCCGCTCCGTGCAAGGCGGAAACCCGCGCCTCGAAGAACCGCACAAATCTCGTCGAGCGCGTCTTCGGGTGCAAG  
GTGACCGGTGCGGGTGGCGATGCCATCCCGCTGCGCTGAGTGCATAACCACCAGCCTGCAGTCCGCTCAGCAATATCGGGA  
TAGAGCGCAGGGTCAGGAAATCCTTGGATATCGTTCAGGTAGCCACGCCGCGCTTGAGCGCATAGCGCTGGGTTTCCGGTT  
GGAAGCTGTGATTGAAACACGGTGCATCTGATCGGACAGGGCGTCTAAGAGCGGCGCAATACGTCTGATCTCATCGGCCG  
CGATACAGGCCTCGCGTCCGGATGGCTGGCGGCCGGTCCGACATCCACGACGTCTGATCCGACTCGCAGCATTTCGATCGCC  
GCGGTGACAGCGCCGGCGGGGTCTAGCCGCCGGTCTCATCGAAGAAGGAGTCTCGGTGAGATTCAGAATGCCGAACACC  
GTCACCATGGCGTCGGCCTCCGCAGCGACTTCCACGATGGGGATCGGGCGAGCAAAAAGGCAGCAATTATGAGCCCCATAC  
CTACAAAGCCCCACGCATCAAGCTTTTGCCCATGAAGCAACCAGGCAATGGCTGTAATTATGACGACGCCGAGTCCCGACCA  
GACTGCATAAGCAACACCGACAGGGATGGATTTTCAAGAACAGACGCAGCCGAGGCGCCGAAACTAAACCGATGTCTGTA  
GGGTTACCGCTGGATCTGCGTGAATTCCAGCAGCAGCAAGAGAAAGACTTTTACAAACCAGCTTACAGCAGGCAAAATTTA  
ACCAGAAAAAGCCGCTGAATTACTGGGTCTGACTTACCATCAGCTTCGCGCTTTGCTGAAAAAACACCAGATTTAACGCAC  
ATTTGCAGATGTTATATTGGCGGATTTGACGCATAACCTCATCAGGGTTTACCATGACGCCATTACTGTATAAAAAAACAGGCA  
CAAAATATGGCTCTGGCACTCGTTGGCGAAAAAATTAACAGAAACCGCTTACCAGGTGAGAAAATTGAAAATAGTACATTTTT  
TAACTGTGATTTTTTTCAGGTGCCGACCTGAGCGGCACTGAATTTATCGGCTGTCAGTTCTATGATCGTGAAAGCCAGAAAGGGT  
GCAATTTTAGTCGTGCGATGCTGAAAGATGCCATTTTTAAAGCTGTGATTTATCCATGGCGGATTTTCGCAATGCCAGTGC  
TTGGCATTGAAATTCGCCACTGTCGTGCGCAAGGCGCAGATTTTCGCGGCGCAAGTTTTATGAATATGATCACTACTCGCACCT  
GGTTTTGCAGTGCATATACACTAACACAAATCTAAGCTACGCCAATTTTTCGAAAGTCGTGTTGGAAAAGTGTGAGCTGTGG  
GAAAACCGTTGGATGGGGGCCAGGTAAGTGGGCGCGACGTTTTCAGTGGTTTTCAGATCTCTCCGGCGGCGAGTTTTTCGACTTTC  
GACTGGCGAGCAGCAAACTTACACATTGCGATCTGACCAATTCGGAGTTGGGTGACTTAGATATTCGGCGCGTTGATTTACA  
AGGCGTTAAGTTGGACAACCTACCAGGCATCGTTGCTCATGGAACGTCTTGGCATCGCGATTATTGGCTAGTCTTCAGGGAGC  
GGTGAATATTCCGCCCTGCACAGCTTTTTACCCTTACGGCATCGCTGAAGAGTGGTGTGTGGAATTTTCCACTCTTACC  
TCCCATGCATAAGTGAATGTGTAGCGGGCTGAAACCGTTGATTTGTCCGCGAAGGTAAATGTGTAGGTACCGGTGTCTATCGC  
CTTATTACACCCAGGCGAATGGTACGCATGTCAATTTTCCGGTCCGGCTTTTTTCGCAAGAAAATGCTCGAAATAAGGCACTG  
TTGCAATAGTCGGTGGTGATAAACTTATCATCCCTTTTTGCTGATGGAGCTGCACATGAACCCATTCAAAGGCCGGCATTTC  
AGCGTGACATCATTCTGTGGGCGTACGCTGGTACTGCAAATACGGCATCAGTTACCCTGAGCTGCAGGAGATGCTGGCTGA  
ACGCGGAGTGAATGTCGATCACTCCACGATTTACCCTGGGTTTTCAGCGTTATGCGCCTGAAATGGAAAAACGGCTGCGCTGG  
TACTGGCGTAACCTTCCGATCTTTGCCCGTGGCACATGGATGAAACCTACGTGAAGGTCAATGGCCGCTGGGCGTATCTGTA  
CCGGGCCGTGACAGCCGGGGCCGCACTGTCGATTTTTATCTCTCTCCCGTCTGTAACAGCAAAGCTGCATACCGGTTTCTGG  
GTAAATCCTCAACAACGTGAAGAAGTGGCAGATCCCGCGATTTCATCAACACGGATAAAGCGCCCGCCTATGGTCCGCGCT  
TGCTCTGCTCAAACGCGAAGGCCGGTGGCCGTCTGACGTTGAACACCGACAGATTAAGTACCGGAACAACGTGATTGAATGC  
GATCATGGCAAACCTGAAACGATAATCGGCGCCACGCTGGGATTTAAATCCATGAAGACGGCTTACGCCACCATCAAAGGTAT  
TGAGGTGATGCGTGCCTACGCAAAGGCCAGGCCTCAGCATTATTTATGATGATCCCTGGGCGAAATGCGCCTGGTAAGC  
AGAGTTTTTGAATGTAAGGCCTTTGAATAAGACAAAAGGCTGCCTCATCGCTAACTTTGCAACAGTGCCGTACCGACGGTG  
ATATGGGGCAAATGGTGGTACCATCCTGTCGGCTGTGGCACAGGCTGAACGCCGGAGGATCCTAGAACGCACGAATGAGG  
GCCGACAGGAAGCAAAGCTGAAAGGAATCAATTTGGCCGACAGGCGTACCGTGGACAGGAACGTGCTGCTGACGCTTCATC  
AGAAGGGCACTGGTGAACGGAATGCTCATCAGCTCAGTATTGCCCGCTCCACGTTTTATAAAATTTCTTGAAGACGAAAG  
GGCCTCGTGATACGCTATTTTTATAGGTTAATGTCATGATAATAATGGTTTTCTTAGACGTCAGGTGGCACTTTTCGGGGAAATG  
TGCGCGGAACCCCTATTTGTTTTTTTTCTAAATACATTCAAATATGTATCCGCTCATGAGACAATAACCCTGGTAAATGCTTCAA  
TAATATTGAAAAAGGAAGATGAGTATCAACATTTTCGTGTCCCTTATTCCCTTTTTTTCGGCATTTCCTTCTGTTTT  
TTGCTACCCAGAAACGCTGGTGAAGTAAAGATGCTGAAGATCAGTTGGGTGCACGAGTGGGTTACATCGAACTGGATCT  
CAACAGCGGTAAGATCCTTGAGAGTTTTCGCCCCGAAGAACGTTTTCCAATGATGAGCACTTTTAAAGTTCTGCTATGTGGT  
CGGTATTATCCCGTGTGACGCCGGCAAGAGCAACTCGGTCCCGCATACTATTCTCAGAATGACTTGGTTGAGTACTCA  
CCAGTCACAGAAAAGCATCTTACGGATGGCATGACAGTAAGAGAATTATGCAGTGCTGCCATAACCATGAGTGATAACACTGC

TGCCAACTTACTTCTGACAACGATCGGAGGACCGAAGGAGCTAACCGCTTTTTTGCACAACATGGGGGATCATGTAACCTCGC  
CTTGATCGTTGGGAACCGGAGCTGAATGAAGCCATACCAAACGACGAGCGTGACACCACGATGCCTGCAGCAATGGCAACA  
ACGTTGCGCAAATACTGAGGCAACTACTTACTCTAGCTTCCCGGCAACAATTAATAGACTGGATGGAGGCGGATAAAGT  
TGCAGGACCACTTCTGCGCTCGGCCCTTCCGGCTGGCTGGTTTATTGCTGATAAATCTGGAGCCGGTGAGCGTGGGTCTCGC  
GGTATCATTGCAGCACTGGGGCCAGATGGTAAGCCCTCCCGTATCGTAGTTATCTACACGACGGGGAGTCAGGCAACTATGGA  
TGAACGAAATAGACAGATCGCTGAGATAGGTGCCTCACTGATTAAGCATTGGTAACTGTCAGACCAAGTTTACTCATATATACT  
TTAGATTGATTTAAACTTCATTTTTAATTTAAAGGATCTAGGTGAAGATCCTTTTTGATAATCTCATGACCAAATCCCTAAC  
GTGAGTTTTTCGTTCCACTGAGCGTCAGACCCCGTGTGGACACCGGCGTACCCTCGGTGCTATCTTCGCGCCCAATAGTCGGG  
GCTTGGCCAGGACTTCCTGAGGCCGTCCGTAACCTCAACAAGGAATATCGTTGATGTCAGTGTATCGCCGTCTAGTT  
CTGCTGTCTTGTCTCTCATGGCCGTGGCTGGCTTTTCTGCCACCGCGCTGACCAACCTCGTCGCGGAACCATTGCTAAACTC  
GAACAGGACTTTGGCGGCTCCATCGGTGTGTACGCGATGGATACCGGCTCAGGCGCAACTGTAAGTTACCGCGCTGAGGAG  
CGTTCCCACTGTGCAGCTCATTCAAGGGCTTTCTTGCTGCCGCTGTGCTGGCTCGCAGCCAGCAGCAGGCCGGCTTGCTGG  
ACACACCCATCCGTTACGGCAAAAATGCGCTGGTTCGCTGGTCAACCATCTCGGAAAAATATCTGACAACAGGCATGACGGTG  
GCGGAGCTGTCCGCGGCCGCGTGAATACAGTGATAACGCCGCCCAATTTGTTGCTGAAGGAGTTGGGCGGCCCGGCC  
GGGCTGACGGCCTTCATGCGCTCTATCGGCGATACCACGTTCCGCTGACCGCTGGGAGCTGGAGCTGAACTCCGCCATCC  
CAGGCGATGCGCGGATACTCATCGCCGCGCGCCGTGACGGAAAGCTTACAAAACTGACACTGGGCTCTGCACTGGCTG  
CGCCGCGAGCGGCAGCAGTTTTGTTGATTGGCTAAAGGGAAACACAACCGGCAACCAACCGCATCCGCGCGGCGGTGCCGGCA  
GACTGGGCAGTCGGAGACAAAACCGGAACCTGCGGAGTGATGGCACGGCAAATGACTATGCCGTCGTCTGGCCACTGGG  
CGCGCACCTATTGTGTTGGCCGTCTACACCCGGGCGCCTAACAAAGGATGACAAGCACAGCGAGGCCGTATCGCCGCTGCGG  
CTAGACTCGCGCTCGAGGGATTGGGCGTCAACGGGCAGTAAGGCTCTGAAAATCATCTATTGGCCACCACCGCCGCCCTTG  
CGGGCGGCATGGATTACCAACCACTGTCACATTTAGGCTAGGAGTCTGCGCGGCAGAGCCGTGTGACCGGTTTTCTGTAGAG  
CACTGACGATGGCGGCGGCGCTCTCTGCAATTGGCAAGGCGTCCGCGCCAAGGATACCAATCTTGCGGCGCGCGGCGTGT  
ATGACGACTGGGGTGCAATTTGAGCCGCCCATTTAACCTTCGCCCTCACAGATACGCCATTCGCCCTCAGATTTAGCGCCATGCA  
GACGAGCTTCCACTCGGCTTGACCTTGCCAGGCCCTCATGCTGAACTGACGCAATCCCATCACCGCCTTGATCCAACCATT  
CGGAGCCTCCACGATCGACTTGCGCCGGCGGTAAGCTGCATCGCCTTGCTCCGTTTTCAATTTCCGCGCAATCGCCGCCGTAT  
GCGGATGGGTCTTGGCATTGACCTTGGCATCTTCACGTCCCTCGCGGCCGAGGGCAACGATGACATCGCCGTGGTGATCGGC  
GACCTTTGCCAGAACAGCCTCACTACGGAATCCCGCATCCGCCAGCGTCTGGGCGGCATTTCTCCGGTGTGGCCTGAACT  
GCTGCCAGCATGCCAGCAGCGCTGACTGTCCGCGGCGCAGTTGGTCAACTCCGCCGCCACGATGATCTGGTGCTCGGCAT  
CGACCGCTGTGTACCCGTTGTAGCTCTGCTCGGAGCCACCACCGGCGTGTTCATGATCCGGCTGTCCGGATCGGTGAAGCTT  
TCCTGATCACGGTCATCCGGCACACCAAACCTCGCGTTTGTACGAGCCACCGCCCTTGTCGAGCCATCCGGATGGCGAGGCC  
GGCGGCCATCGTCTTCGCTGCGCCCCCGGGCCTGGTCCGCTTACGCTGGCGCGCTTCCAGGGGTCGGTTCGGGCTGAGGG  
CGAAATGACACCCTAAGCGTTAGCTCTGTGTCGTTGCACGATGTCAGCGACGGTATTCTTGCTGATAACGAGCTCGCGTGCGA  
TCCAGCGATAGCTGCGTCCCTCGGCCCTCATCGCAACCACCTTAGGCAAAAGTCGGTCTGATTTTGGTTCGCACTCCGGCCTGA  
CAACCAAGCCTCTTACCACGTGCCTTCGCAACAGCAAGGCCTGACTTGACCCGCTCGCTGATGAGATCCCGCTCAAACCTCCG  
AATGCCGAAAGAAACGTCGCCAGCATTTCGTCCATACGGCGACGAAAGATCGAACGCCATTCCATTGCTATCACGGAA  
ACCTTCCAGTTCTCCAGTTCACGTAGCGTATTGAGCAGATCGAGCGTTCGAGCGCCCCACCAGGAAAGCTCAGTGACCAGGA  
TTGCATCAATTTGTCTGGACTGGGCAAGCGCCAGGACTTTCTTTCGCTCGGCCCGGTGAGTTTAGTTCTGAACCTGTTTCC  
TAAATATTCCCACCACGTCGTAGCCGGCACGGCCGGCGAAGGCTCGCAGATCAAATTCCTGGCGTTCACAAGACTGATCCGC  
TGTTGAAACCCGGCAGTAAATGGCGGCACGATGTCCAATTGAACCCTCCTGGATTTTTGTATCGGAACGCCCTGATTTATATG  
GGCTGGCTGTTGTCCAAAACAGACTATACTTCAAAGGGACGAATTTGTATGTCACGACGCCATTTTTACCGAACGGCAGC  
GAGCAGCGCTGTTGATCTGCCACGGACGAACTGTCGCTACTGAAGTTCTACACGCTGGGCGATGATGACCTGGAAAACAT  
TAGGCAGCGCCGACAGCCGAAACAGGATTGGCTTTGCCCTGCAACTTTGTGCCTTACGATATCCGGGCCGTGCACTGGCT  
CCTGGTGAGATGATCCCGCTGAAGTCTTTCCTTCGTCGGTCTCAGCTTGGAGTTCGGGCTGATGCGCTTCTCACTTATGCC  
ACACGGCGCCAAACCCGTCAGCAGCACATGGACACGCTGCGCGAAATTTACGGCTACAAGACCTTCACGGGCCGTGGTGCC  
CGTGATCTGCGGGAGTGGACTTTCGGCCAGGCCGAAGATGCCAGATCAAACGAGGATCTTGCTCATCGTTTTATTGTGCGGT  
GTCGGGAAACTTCCACCATTCTGCCCGCAGTATCGACAATCGAGCGCTTGTGCGCGGATGCTCTGGTCGCCGCTGAGCGGCG

GATTGAAACGCGGATTGTGGAAAATTTAACAGCGGATGTTTCGCGATCACCTGGACAACTTCTGAGTGAAATGCTCGCCGGC  
AATATCAGTCGTTTTATCTGGCTTCGCAACTTCGAGGTTGGTAACAACCTCGGCTGCTGCTAACCGTTTGCTCGACAGGCTCGA  
ATTTCTGCGTACCCTGAATATCAATCATAGTGCTTTGGCCAGCATACCTGCCATCGCATTGCCCCGGCTGCGTCGGCAGGGTGA  
ACGCTACTTCACCGACGTTTTGCGTGACATCACTTCGGACCGCCGCTGGGGCGATCCTTGCCGTCTGTGTTGTGGAGTGGGAA  
GCGGCGATTGCTGATGCCATAGTCGAAACCCATGACAGGATCGTAGGAAAAACCTGGCGGGAAGCGAAGCGCCAGCATGAC  
GAAACAATTTCCGGCTCTAAAGCCACACTCACGGATACGATCCGTACCTTCACCGCGCTGGGAGCTTCGTTGCTTGAGGCCCG  
CAGTGACGGAACCCCGCTGGAGATGGCTGTCGCCAGTTCGGTTGCATGGGACCGGCTCGCTCAACTGGTAGCGACAGGGAC  
TCAACTCAGCAACACGCTAGCCGATGAGCCTCTTGCATATGTCGGGCAGGGATAACCATCGCTTTCGTCGTTATGCGCCCCGCAT  
GTTGCGCTGTCTGAAGCTCGAAGCCGCGCCGGTTCGCCGACCATTGGTAGCAGCAGCTTTGTCGATCGGAGAGATGAAAGG  
TGTTGCATCGCCAGAAAGGCGTTTTCTGCGGCCAGCTCCAAATGGAACCGTCATTTACGAGCTCAGGAAAAAGGAGATACC  
CGTCTTTGGGAAGTGGCGGTACTCTTTCACCTCCGGGATGCTTTTCGTTCCGGAGATGTCTGGCTCGCTCATTTCGCGCCGCTA  
TGGTGACCTCAAGCAGGTAAGTGGTCCGATGATCGCGGCGCAGGAAAATGCAAACTGGCCGTGCCTTCCAACCCACAGGA  
TTGGCTGGCAGACAGAAAGGCGCGACTCACGATCGCTCTTAAGCGGCTGGCCCGGGCTGCCCGTAACGGCACTATTCCGCA  
CGGTAGCATAGAAGATGGAACGTTGCGGATCGACAGGTTGACAGCAGACGTGCCGATGGTGCCGAGGCACTCATACTGGA  
TCTGTATCGCCGAATGCCGTCCGTTCCGATTACCGACATGCTGCTTGAAGTTGATGCAGCCCTTGGTTTCACAGATGCGTTTAC  
CCATCTGAGAACCGGGGCTCCATGTCGCGACCGGATCGGTCTGCTCAACGTCTGCTCGCTGAAGGGCTCAATCTGGGCCTG  
CGTAAGATGGCGGAAGCTACAAACACGCATGATTACTGGCAGCTCTCACGCCTTGCCCGCTGGCATGTTGAAAGCGAAGCCA  
TGAACCAGGCATTGGCAATTGTGGTGGCCGCGCAGGGTAAACTGCCGATGTCACGCGTCTGGGGGATGGGCACGTCAGCAT  
CGAGCGATGGTCAGTTTTTCCCGACAGCGCGCATGGCGAAGCCATGAACATGGTCAATGCCAAATATGGTTCTGTTCCCGG  
CCTCAAAGCGTATACTCACGTAAGCGACAGTTCGCGCCATTTCGTTGTCAGTCGATCCCGGCGACCGTGAGCGAGGCACCG  
TATATTCTCGATGGACTACTGATGAACGAGGTCCGTCGCCATGTTTCGCGAACAGTATGCCGATACAGCAGGATTCACCGACCAT  
TTGTTCCGAGCCAGTAGCCTGCTCGGCTACAATCTCGTTCTGCGAATCAGGGATCTGCCATCGAAGCGGTTGTACGTATTTAAT  
CCCGATACGACCCCGAGGAGTTACGCAAGTTGGTAGGTGGAAAAGCCCGGAGGATCTTATCGTTGCGAACTGGCCTGATA  
TTTTCCGTTGTGCCGCGACGATGACCGCTGGCAAAATCAGGCCAGCCAACCTGCGCAAGCTCGCTTCTTACCCACGACA  
AAACAACCTTGCAATTGCGCTTCGTGAAGTTGGTCGATTGAACGGACCCTTTTCATTATTGAGTGGATCCTGGATACGGACA  
TGCAGCGGCGTGTCTCAGATCGGTCTTAACAAGGGAGAGGCCACCATGCGCTCAAAAATGCGCTCCGTATCGGGAGGCAGG  
GGGAAATTTCGCGATCGCACGACAGAGGGGCGCAGCACTACCGAATCGCTGGGCTCAATTTATTGACTGCGGTGATCATTTACTG  
GAATACCGTCCATCTTGGTCTATGCCGTCACGGAGCGGCGGAACGAAGGGTTGGATGTTCCCCCTGAATTTCTTCCCCACATAT  
CCCCATTGGGCTGGGCGCACATTCTACTGACTGGCGAATATCTTTGGCCAAAGGAACCGAAAGCTTAGGGTGTCAATTCGCC  
TCAGCCGGAACCGACCCCTTCCAGGCGCGCCTTTGCCGCTGGATCGCCTCCAGGCGCTTCTCGCGGCGAGAAATCTCGGCA  
GGAATGTCCAGCTCCGGCTCGTTACGCTCCTGGTCGTCGGTAGCCTTGGCGCGATCAAGCAGCGCCTTGATCTCGCAATGCA  
ATTCGTCTCGGCCGGCTTCATGCGCTTATAGCTCATCGCCTTGTGGCGGCTGGCGTTGGCTTTTACCTTGGTGCCGTCGACCG  
CGATCGTGCCAAGCTTCACCGACCCACATTCGCGCGCCAGTTGCACCACCTGAACGAACAAATTCTCAAGCTCGGTGAGGTG  
TAGGGCACGGAAGTCACTCAGCGTGCAGGTTGGGCCGGGAAGTTTCCAGCGGCCAGCACACGCAACGCGACATCCTCGTACA  
GCTTCTGGCTAGTTTTCGCGAAGAGAAGACGCCGCTCGCGTAACCATAGATCAGCACTTTGACCATCATCGCCGGATGAAA  
CGGCTGATTGCCCGGACCACCGCCGCGCATAACGGGCGTGAATGCGCTCAAGTCCAGCGTATCGACAGTCTCGCTGATGAAG  
TAGGCAAGATGCCCTTCCAGGTAGCCACTCTCCAGAGAAGGGGGCAGCAGATAGGATTGGTCGGGTCCGTAAGGAAGGTA  
ACTGGCAGCCATCCCCGATCGTCTCGATCTTCCGCCGATTTGGCTTCTGCCGCGCAGGCTCCTAGGCCACCGTAGCTAAACA  
TACGAGAAAAACCGCTTCTTGAAGCGCTCTCTGAGACCACCTTGCCGACAACGCAGAAACGGTTGCGGAAAAATCGGCGTTT  
CCGGCGTACGCCACCCGACCTGGACGAACTATTGCGGACCTGGAACCTGGAGTAGCGGAATTCCCCGGGGTTTTAGCGTCCG  
GCCACAGCGCCTCAGATAGATGCGGTAGCCTTTGGCGGGTCGTCATGCCGCGGACCACCCCAAAAAATTCCACAATGCGG  
AATGGCGGAATTTCTGGGGTTCCCGCTTACCCCCCTTCCAGGCGAGTAGCCAACCTGAACGGATGGTTCCACCGCAAAGGC  
GGGCGAGGGCGGCTGTGCTAAATGCTGCGGCCAGAAGCCAGGTTGCTAAGTTTTTTCATTACAGGCTCCCGTTACACACTGCA  
TTTTATATTAGGGTCAAATAAATTTCTTTGATTTTCCGTTTTCCATATGCACCACAACGTCAATGGTGGAGTAGAGCATTTCG  
CATAATATCGCTCATATCGAGCATAACGGCCGATAGGGGTCGCTTGTAAAGCAGCCCAATACGGTTAAAGGCATCGCGCGCAG  
AGTTAGCGTGCGTTGACATAACCCGCTGGATGGCCGGTATTAAGTGCTTTAAGATAATCCCACGCAGCATCATCCCTAAGCT

CAGTCATGATGATACGGCCCGGTGTCAGACGCATACAGGCTCGCAGGGCATCAGTGGCGCTGACGCGGCCGATCTTTCCTGC  
ATCGCCGTACATCATATAAACGGCTTCTACAACGTGATCGACCGTGACTTCGTGAACGTCCTCTAAAATAATTACACGCTCGTCT  
TTATGTAGCGATTTTAAACAGCGCGCGCTGAGTACCGTTTTCCCGACCCGGTTTCACCGCAGATCACGATAGTGC GTTTCTTC  
TCAACGGCGGTTTTGCAGGAATGCGGGCCATTTTTCGCTGCTGTGCAGCTCTTTAAGGAAAAAATCATCATCCGTTAGGCTTTG  
CTTGCTGCCGTAATCTTCCGGCAGTCACTGAAAATCCCCTCGCGGGTCAGCTGCTCCAGATTTTTATCGGCCGCCAAATCCTT  
ACGAAACGCTACGGCCGTTGTACCGTCAATCACCGCAGGGGCAGACAGATAACGCCCTGATCCCGCCAGGCAGGATCACGT  
CATTAAATGGCCTGCATGGTCAGCTTGTGCTGCTCACCAACGATTTAGCAAGGTTCCCTAATAAAATCTGCCGTAATTGCCGCGT  
TCTGCACAACCCTGCGGCCGCTGAACGTATCACAGATAACTTCTGAAAGCAGTTAATGCGAATTTCAAAAACAGTAGGATCT  
TCTAAATACTCGCGCAGTGGGCCAAGTTGATAGAAAGCTGCATCAGTCATGATTACTCTGAAGAAAAGCGGGCGCTAAGCG  
CCCCTTTTTTAGTTGTCTGCGAGCGTATAAACGCCGCTGAAATCGAGGTCGCGGGCAACAAAAATGCTCACCGCATCACCT  
GCTGATCGTAGAGGGTAGGGGGGATAGACATGTAAGAGCGGAGTGCTTCAGACGCCAGCTGCTCACCGCTGTTTTCTGTGCT  
GTTGTACTGAATGTTACTCTGCGTCTGGTTAACCAGCGCCGTTAAGGTGTCAGAGAACAACGAAATCATGATCGCACCAC  
GCAGACGCTCCACATATGGGTATCCACCTGGCCCGGAATCCC CGCGCTGCCGAGTGAGTTGTTCCGGCACTGTCAATATTA  
ACGATTGTCCCGTCTGGTCATTGCGGATACGCTCCAGAGAACAAACACGCGCGCCTGGCCGTCTTTGATACCACCGGTAAT  
CTGCCCGTCAACCCATGAGCCTTTATCAATCAGCCTAACGAGTCCATCAGCTGAGTAAACGTCCTGTGAAACCCGGCAGGAAA  
CCTGACCCGGAACAGTGGTATCCAGCTCGGTGCCGGTACCACAGGGGATCATTTTGCCTTTCGGAACAGTCAGGCTGGGATT  
AGCCATGACTCCAGCGCGGCTAGCCTTCAGCCTTG CAGGAGTCAGGTTTTTAGCGAGTGCTGAACTACCTTCGCTTGTTTCGT  
TGTCTGGGGCTGCACTCCGGGACTATTGCTTGTAGCCGCTGATTAGTCTGGGCCAGCTCGCCGCCAGACGACGCTGCATA  
GCCAGTTCTTCAGGCGAAGGTTCTTTACGCTTATTAGAGGTACGCGCGGCGGTATTGCTGCTGCCCGCATCTGCATCTGCCTG  
TGCGGCAGCCTGCACAGCACGGGCATCAGTGGCGCTATTCTGCGCAGTTGCAGGTTTATTAACATCAGGATCGCTGTTAAAG  
CTGTAGTTTGGCAGTGTATTGGCCTGTTGCGCTTTACCACCGTCTTTATCAGCTTCAGCTTTAGCCGGGGTGCGAATTTTACCC  
ATGACCGTAATCCCGATGAATACCAAAGCAAGCAGCGCCATCAGTATGACAAAGGCTTTCATACCAGGAGCCGAACGGCGGT  
TACTGCCTTTAAATCCGCCACGCTCGCTTTCGAATTCACCGTCTCCGGTGTTTTTCATCGAGTTCCTGATCTACATCGACACTTTT  
ACGGGCCATCAGTTATCCTCCCAATTTGAACCCTGCGCACATCCGGGGAAGCCGTACCGGTTGCTACCGCACCGGCGCCCG  
GCGCGAAATTATTATTACGAACGCCAACGACTTTATCGCCAGACGAATACGCCACTCTTTAGCGACGTTTTCCACCTCGATGA  
TGTTGCGGTTCTCACCCACAACATGAGAGTTAGGCAGCGTTTTCTTTGCCACTGGCCGAAATCATGTAGACCTGCGGTAACCTC  
GCATTGGCCGGAACCTCAAACCCGGGTAAAGCGGTAGTTATCCAGACGTGAACCCGGCTGGATGCTGCGCATTTACAGGCTGTT  
CGCTCATTACGTA CTGATAGTTCTTCGCCCCGCAAAGCCGTCTGCTTCAGCTTCTGCGTAATGCGTTTTTTTATCAGCCGCGCT  
TTTGGCTTTTTCTGCTGCTCAAACGATATTCATAGGTCAGCTGAAGAACGGCCTGGCGCACAGCCCACGGCGTTTTCAATAA  
AGGATTTTGATACCGTACCGTCTGCATTTTTCTTCGTTTTCTCACCGATGAAATGGAGGACGATGTTATAGGTGCGCTTATCGGT  
GACGATCACCGGTTGGTATCACTCATGGCCTGTTTCGGCTTCAAAAAAATGGTTCATTTTGTGCGCAAACGTCCAGCTTT  
CAGAATCGCCAAAAGCATGAGTGATATAGGTTTCGT CAGGCGGACAACAATGTGGGTAGCCACACCGGCGATAGCGTCAAT  
TTTGACCACATTAACAGGGTTATAACAACGCTTTTAATGCGATAGTCATAAGGAGAATTGCGGCCAACCTCAAGCGCCATAA  
CGTTAGTGGCCGCGCCTCCAGGACTGACAAAACA ACTGCTGAAAGAAGTAGTTTTTTCATGGGGCAGCCCTCAGTTAACTT  
CAGGGTTGACGCGATAACTCGTCACGCGGAAACCCAGCGGGTTGACATAACGCTGCTCAGCATTATCGCCAGCGATTTATAT  
TCATACCCCATAATGGCAATCCAGCGCTGCGGCTGATCATCAACGGGATTGCTGCGCACGCGGCGAACC GTAGTAAAGCGTAT  
CGTTGCTACGCCGTGCGGTTTATCGAGGATCACAGAGTTAATCTTCACGCGGGTCTGTTTCACTGTCGCCCAGAACCTTATCAA  
GACCGTTGCGGCCCTTGA ACTTGCTCTGGTAAGACTCTGCCACGTTCCGGCTGGACATTAAGCCAACGGCCGTATAGTCGAC  
CTGAACTGAATAGAAGTCATAGCTCTCACGGTGAATGACATATTGTGTCAGCCAGA ACTTATCAATTTTCGTACCATAAGAGGT  
CTGGTTCGCGGGTCAGCTTGACCTGCTGTACTTTCGTGAGTGGCCTCGTTGAGCGTTAGCAGATGTGCGGGGATTGGCTGGCTG  
TACTTATGCACCACGTAACCAACTAAAGAGAGTGCAAAAACAGTTACCACCGCTGAACCGGTGGCAACCATCCAGGCGGTAC  
GCCGGGACTTCAGCACTTCATCCATCAGATCAACTTCAAGCCCTTACGGCTTTCGTTGAACTCTTTAATGGCTTACGCTGTA  
GCCCTGTTTTTTTATTAGCTTTCATTTGACCACCTTGCATCAACCGGATTGTTTTGTTTACTGGAACGGTGTGCTCCAGT  
CCGGCTCCGGTGGCGGTTTATGCCCGCTGGAACAGGCGCTAATCAGAAGAACTCCATAAGCAATAAGCTGCGCATTACGGC  
ATCCATTATCGGTTGTTGAACGTA CTAAATTATAATAAGTCGTCGAAATTGCAATTTCAACGACTTTTGTTTAATTTTATGCAGCC  
TTCTCCCGCGACTGCCCTTGCTTACC ACTTAAATTAGAACCACTGCTTCTCCGCTGTTGCTGCCACTTCTCCACCTGCCG

ATTGCTGGCCGCCACTGTTACCGCCTCTGAACGCATTACCGCCAAACATGCCGTGGCTGCCCATATTGCCAAGCGCCTGC  
ATGGAAGAACCCGTAGAGCGTGCGGCGTCAGCAACTCCGGCGCTGATACCGCTACCCCAGCTGGCGGCAATTTGCGGAATCT  
GGAACAGAACGAAAACGGAAATGACCGTCAGTAATAAGGCGGAGATAGAACCAGTGATTGATGAGTAAGCGGCATCAGAGT  
TCATCGAGGACAGGAGTTGTGCAACATCTGCATGATGAAACCAAACACGAGCGCAAGAATGACGACGACAAGGCCATAGT  
TAATGACCGACGCCAGCCAGCGAGCAAAGATGTTTTTTGTCGCTCCCCACAGCAGGCAGAAGATTGCAATCGGGCCAAAAC  
AAAGCGTAACGGCCAGAAGGATCTTAGCCATGATCACAAAGCCCGCACCGAGGCCGCCAGCACAACGGTAGCAATCATCAT  
AATGCCGCCAATGGCATAACGCGGCCAGGCCGCTCGATGAAAACACGTCTGCGGCTTCCCATGCGGTGTTGACGATCTTGATAC  
CTTTTTCAATACCGCTATCAATAATCGCCGGTACGCCACTTGACCCGACTTTATTAGGGGCAGACAGTATCCCGGCAAATCAT  
CCGGCAGGTGAAGCGCCACGTTGACCAGTTCCTGTTGATACCAGCCGCCGCCGTTGCAAAGCTCAGGATAAGGGCTATGG  
AAAGATACTCTTTAATCAGCGAACTCAGGCTGTCGCCGCCCGGATTAAACGCTGAGTACATCCCCTGAACCATCAGCTTG  
ATTGTCAGACAGGTGGCAATCAGAGGCGTTACATCAGAGATAATGGTGGCAACATTGGCGCTCACCATTGACGTAATCGCCCC  
GTCTACTTTTGCGAAAATGTCTGCGACTAGGGTGAATGCCATATTGCCTCCTTACTCCTAAATTTTCGGTGAATTGATTTGCGCG  
TCTTTTTTGCCGAACACAAACAGCTGACGATCGGCTTCGCGCGCGTTTTTTGCAATCAGGTTTCTGAAGTTCATCCGCGTCTTTC  
TTGCATTCTGAATTGTTGCCTTGCCTTCTCATGTTTTTTGTACCACTCCACGTCATGCGAGGCATCGCAGGCCACTAGG  
AGGAAAGGGATAACAAGCAGTAGTTTTTTCATAATTACCTCAGTTAATTGAAGGTGACGCGGTAACGTCCCCGCCGTTCCAA  
AAACAAAATTGTGGGTGGCACGTTCTTCTGCGCACGTAATAGCTTGTCTGTGACTGCTGCAACATGTTTCATCAGATTCAGCT  
TCGCCTGCTCACCTGAATAGCACCTGTGACGTCTGGATACGGGCCTGTAAGTCAGCAATCGATTTAGGTCTGGAGTCGTT  
TTAATCTGCTCCGTGAGTCTCTGCATATCGGTTAGTTCTGTCATCTGGTTGTTGTAGGCTTTTTCTGCCATAACACGGTCATAAG  
CGCTTTTTTTCAGCCAGCTTTTTGTTTCATGTAGGTAATTGCTTCGCTGGGCGTCATGTCGTCAACTTCCGCATTAACCTGGCCCA  
TCATGCTGTTAACTGAAGGCGTGACGGAAGAACTGGAGTTCATGGCGTCGCTGTAGATCTCCTTCCAGTTGTCCGGCAAATTA  
TTTGCCAGCGTGCTGGTAGACGTCCCCAGCAGATCGCCAGGTTGTTGTCTTTGCCATCGACTCATAATTTTTTCTGCGTT  
TGCAGCTGGCTTTAAGCTGCTCCAGCTGCTGCGCCATTTGCTGAAGCTGCTCGACCTGTTTAGCCAGCTCAGTAGGGTTGGT  
CACGATGATGCCTGCGGAAGCGCTTTGCGCGCCTCCAGTATCAGGCCGGTGGTCAGCAACTACTGCCGTCAGTGTTTTTTCA  
TGGTGTTTTGCCTCGTTGTTAAGCCGTCAGGCGCCAGTATTCTTTGAGCCATACTTCAGGGTCATTACCGAGCCGTTCAACCA  
GCTCATGCGCAATTTCCGGCTTTTGTGGTTACCCGGACAACACGCTAAGAACGTTGTCCATTGTCTTAATATCTGCATCAATATC  
GTCGCTGTTGCGAGGGTAGAGATTGAAAGAAGCAATCGCAGACTGTTGCCCTTGTTAACCAGGAACTGTCTGGAGTGTTCCG  
GTAATCGACATCAGCGCGTCGTATTACAGCATCAGTAAGGAAGGCATAATCCTCTCGGATAGCTTCCGGATCGCGCAGGCAGAT  
TTTTGTGACGGTCTGCGACATGATCGTGCGGCCAATACGGCTGGACAGCGCATCGTTCCGGCTCCTGCGTGGCAAACACATAG  
ATAGCGTCTTTCTTACGGTCAGTTTTGATACCACGCTTAACTTACGCTCGATAACCGGATCGTCAAGGTAGGCGTGGAACCTCG  
TCAAAGCACTGAATGACGCGGCGTTTGGCGTCGATGGAGTACGTACCCGGTACAGAAGGTACATCATGAGCGGAGTACGG  
GCCGGGCTGGATACTTCTCTTTGGCTGCGATAAACTCGGATAAATCGAAGCCAAAATATCATTGCGCTGAGATCCAGGCT  
GTCTTTATCATTGTCAAACAGCCAGCCATACTGGCCTTCGCGCGTCCATTGCGCGCAGCAGCCCTTTCAGTGATACGCCATTTTC  
CACAACCTTCAATCACGTACCCGTCCAGGATAGTAACGGTGCAGCGCCTCGCGTGGAATAAGTGAGCCTTCCCCATAACCGCAT  
CAACGCCTTCAGCCAGTTCCGGTAGCCATCGTTGCGCTGATAGGCCGTTATTGGTGGTTTCCACACAAATGCGGAACAGGTTT  
TTAATGAGGGCAATATTGCGTTTTGGTTCGTTCAATCTGAAGCGGGGCAAACCCGGACGGCATAACCTGTTGCAGAACTTTATA  
GTAGCCACCAACGCTTGAATGAACGGCTCCATAACCGCGGTCACGGTCATAAACAAGCCGCGGGTTGTACTTCATTGACT  
GCGCCAGCAGGAAGTTAAGCAGCGTGTTTTACCTTCCCCGACATACCCGTTATTAACGCATGGCCCAGCGGGCGTTTACC  
GTAGGAAAGTTCTTCAAGCGGGTACATGGAAATTAATAAGAGTGGCGTACCGCTGATCGTGCGGAACATGGTCAGCGCT  
GGCCCCACGGTTATTGTCAGGCTTGGCCACGCATAAAATTGTGGAACGGGCTGAAGTGCAGGAAGTTCCATGAGTTTATCG  
GAACCGGGCGCGGCCCATTTCTGGTTGCCAGGCAGTCTCGCATAATATGCAGCCTCAGAGGCCAGGCTGAGAGTCCCGC  
CAACCACGCCACAGCCGTTAGCATAACCTTACACGACGCGCTTTGCGCTGTACCGCGTTTTGGTCATTATCCAGACATGC  
ACGGTTCCATGATGGTAGCCATCACGAACTCTTGGACGTCAGCATATCGAGCGCGGTACCAAGCTGTGCCAGCTGGCTTGG  
CGCACGGTGCAGCGTTTTCTGCAAAGATTTTTCTGATGCGTCAGAAACGTTTTAGCTGAAGATTGAGAGAGGCAAGAAAAA  
CTCTGCGTCAGAAGGTATTCAAATCGGCTTCTTAAAGCATGTTAAGCTGGCCTGGCTCTGTATCTTCTCGTATTACGAAATT  
CAATGCCGGTGGTATAGAAGTTGTGATCTACCGTTCTGATCTGGACAACATCCCCCACAGTGAGCTAACAGGGCGGTTGTCC  
ATGATGTACTIONCACGGATACGATCACGGCAAACAGGCACGATGGCCCATTCATATTTGCGAGGAAATAAAGGAACTCCAGCGC



TTTTGAATAAGCGTGAGCCTGCGAAGGTTCAAGGCTCGTTGCGTTCGATAACAATGGCTTCGTCAAAAATGTCTGATTCATCGA  
CTTCAGCAAGTTCTTCACGTTCTTTTTTATCAGGCGCAGGAATTTCAACACCGCGTTTGTACAGATAATAGATAACCAACTGCT  
GAATGCCATACGGCTTCATTGCTTCCAGGATTTGTTTCAGAAATATCTTCCAGACCTTCAAGCGCCTCATTCTGCATTCGCTGAAT  
TTCGTACAGAGTCGGCTTTTCAAATTTCCGCAGAAACTTCTGTGTTTTATCCCCTACCTGTTTGTAAATAACGGTCAGATAAAG  
GTCATTAATCAGCTGCTTGAATCACCGTGCAGCTTACGGTTATATTGATCAACATAAGCAGGGAAAAAATGGTCATACTCACC  
ATCCGGGTACTCTTTAGCCTCATGGTGATATTCATGCGTCCACAGCTCTACATGGTCTGTTCCGAAGCTCTTGACCAGCGTATTA  
AGGTCTTTATGCCAGGTGACCAGTTCCCGATCTGATGCGCAGTCATGTGTGCGGCCATCCAGCTTGAAAAAGCCATCAGATC  
GCCGTTTTCCATCGAAATCACGTAATCATTGAGGTGATAAGAATAGGGCAAATACTTTTTATTTACTGATGGCTCCTTACGGTAG  
GCATCAATTTTTTTGGCTTCGTAGCGGTGGCAGCTCTCATTATTTAAACCCTTACGTTTGTAGTCAACAGAGGAATAAGACG  
ATCCTCCCCACTGCTTAAACGGAGAATCAAACCAATTACTGAATTTGGTTTTCAACCACAGGCCATAATTCGAAACATGCGGT  
CGTCATATTTTGTAAATGCAGCTGAAGGAATCCACAAAAGACGAACACCAGGATCGCCACATATGAATAATCATAAAAAGC  
GAGGCAGAAATCATGAATATCATAGCTACATTACGTGGTACACCCAGCGCGGAGGTAAGCGAGTCGCACCTTTGAAAA  
GCGGTCTTTTTCCCGTCAACGAACATCTTTGTAGTCTCACTTTGGGGGACAAAAGTCCCCCTTTTCGCGTTGTTTCAGCTTCT  
ACGCCCCGTCAGGGAAACCAGAAATGATGCAGAACCAATACCAATCAGCGAGATTACGATACGAGGAATAAAGCTGGCTGGG  
ATTACGTGAAGCATCCACATAAAGCAACTAACCATGATCGCAATAGCACAACCAATTGGAATCCATGTGCTCAACCACGTCTGG  
ATTGATGTAGCGGTTGATTCACCAGTATCGGTGCCAGCGGCCAGCGCAATTTGCGGCAGGGCAATGGACAAAACGCCCATAA  
CTACCGCAGGGCCATACTTCTTAAACAACGTGGTCATACTTTCTCCTTACTCACTATCTTCTGTTGATTGCAGATTTAACGGCA  
TTCTTCAACGCCACACTTATCTTTCAAAAACCTGCCAGTAGCCTTAAATCAGCCCAGGTTTCGTAGTTCATGCTCTTTGTTAACC  
CGAATGGAACATGCGATCTGGCCCAACTGTTTCATCGTCTATCTGAAAAACGGGATACCACGTCTTTAATGAAACCCGTTTTATC  
GTTACCTCCTTCACTTTTCTGTTTCAAATAGCTCCAGGATCTGTGATTGCAATACAAGGTACAAACGTTCCATCCATAACCTCA  
CTCCCCCTTCGCTGTTTCTGTTTGGTTAAAAAGGCATCCGTATTATTTGCGGTGAAGGCATCGCCATCACCCGAACCAAAAAC  
ATCTTGTTACCGTCATACTGCGTGCCGACTTTTTGCCTGCTGAGGCTCAGTCGCGGTGCTGTCTCACTGGTCTGGCCATC  
AGGTAGCAGCGTAGGGATTTCAAATCAGTTGATTGACGCGCCACGTTGATAACTTTTCGTGACATACCCGTTAGAAATCCCGT  
TTATGAGTGAGCCGGTGTGTAGCAGGAAAGCGCGTGTCTCAGCGCAACCTGCCCGGCTGGATAGGATTTAGGGCGCTATC  
ATAACAGGCTTTAAGGATGGTCTGGCTCGCCCGCAGTTGATGCAGGGCTTGAAAATATCGTCAACCGAAAGACCCAGGCC  
ACTAAATTATTTGAGTTAATTTGTGCAAGGCCCATATCAAACTTTTATTATCCTTCAGCAGAACTTTGAAACGCTGACGGCCT  
CAGCTTCAGTACGTGGTTGCTGTTTTAACTGGTACTACCACCGTTAATATTGATCCTGTACGGCCATTTGAGGACTCATGGC  
CGACGATGTACGCCATTGTTAAGGGTGAACATCAGGCGCACATCTCTGCGCAAGCCTGGCAACTTCATCTGAGGCAGGCGC  
AGCACTGGCACGGCCAGCACAAGCAAGGCAGGCCAGAGCGAGAACCAGAAGTTTTGGATGTTTACTCATTACGTTTCACC  
GCGTAATTGTAATTTGACGACTTATGTTTATGATAAGGGCTAATGAGATCGTGTCAAGAAGAAACGAAAAGAAAACCTCTGA  
AGGAAGGAAGGTAATGCTGTTCCCCTGAAATCAGAAAAACGCCCAAAGGTGAACCCATGTATCGTGACCCGGATAACCCT  
TTAATACGTGGACTGGTATAGGGAAGCGCCCGCCTGGCTAACTGCAAATTTGGACGCTGGCATTAGCCTGGAAGCCATGA  
AAATGCAGGGCGTTGCCAACCCAGAGAACATAGACAAGTAAAATACCGCGACCCAGGAACGCAGAAAATACCTGGTCCG  
GGACTGGCCGCGACCAACATGGCTCAAAGAGCTGCTTGATAGTGGTTTATCACTTGATGATCTAAAGATATAACCGGAGAGT  
ATAAAAATGGGCGATGTTATTGATTTTTCGGAAGCAAAAAGGCAGAAGGAAGAAAAGGCATTTTCCATTCCGCCCATTT  
TAAGAAAATTCCGAGTCCATGCTATCAGGTTACTCGCCAGCATCATCAAATCCGGCTCTTATTAGTTGCTTATATCGTTAAGAA  
AATTACAGGAAAGTTAATTAAGTTGTTTCGCAATGTTAACGATTTTCGTTTTTATTGTGCAATATATCGCAGGCGATATAGGTTAC  
AAATCTATTTATAACTCTGCGTTATTATTAATATTACTTACCGTTATCAACATTCTGGCGGGTGTATATCTGAACAACTGTTAAGG  
ACAAAACAATGAAGAACTCTTAATCCCTCTGATAGCAGCTGGTAGTCTGCTTTATCTTCTGCCAGCCATGCTGAAGATCCCT  
GCAAAGTTATTATGTGCATGGCGGGCAAGCTCACCGCGATAGCGGCGGAAGCGAGTGTAACAGTGCTGAAGCTGCTTTCTT  
CAATATCGTTAAAAAGAACAAGCACGGCTTTTTACCCAACCACACGAGGGATGCCAGGAAGGCTTTTCTTAATGAATGCCCCG  
GATAATGGCGAAGGTGGAAGTAACAGTCGATGATAAGCCAGATCATAAGTAAATACGGGAAAGTTTCGCTTATAGGCGGGCT  
AGGAATAATCTCAATTTAAGGAGCCAACGTGAAAAAATTATATTAAGTGCATTAGCCTGTACAGCTCTCTTAACTGGTTGCGT  
CAGCCAAGATAAAGGTAATGCGATGCAGAGCCAGATGAATAACCAGCAACGCCAGATTAACGAATTATCCGTTTCGTTTGCAGT  
CTGCGGAGTCCCGGCTATCAAAGCAGGAAGAAAAGCTGCGCAACGAACTGCTGCAATCCAGCGGCTATTGCTATCTGAATGG  
CGCCCGCTACTCGACCGGCACCGTACTTTACGGGCGGATTTGCCAAAATCAGTCAGGCAGCGCTTCGTGGCAGGTTTACAGC

CGTCGCTAAACACCAGGGCGGTTTAACCGCCCTTTTCTTTACCCACAGAAAGCACACTATCACCATGTTCCCCTTCCCCACTAC  
AGAAAACCTTATTCTATGGGCTTGCAGCGCCATCGCACTGTTTGCCGTTGTATTCTTCCGGCGTTCAGTACGCAACCGACGAC  
ACAAAAGGAAGCAGCAAAGTGCAGCGGGGGTGTGGAGCGCATAAAGACGTTGCCGGGCTTCCCACAAAAAATTAECTAC  
CTGAGGAAAATTGATCCTTTTGTGTTTGAAGAAGTGTGCTGGAAGGATTTGAAGCGCATGGCGGCTTTGTTGAATAAATCA  
GATTTCCGGTAAGTCTCCCGTAGCGGGTGTGTTTTAGGCAATACGCACGCTTTCAGGCATACCTGCTTTCGTCATTTTGT  
CAGCGCTCGTACCAGGGCCATAGCCTCTGCAACCTGACCATCGTAGTCACGCAGTGTCAAGTGAACCTCCGAACAGCTGTTTTA  
CCCGGTACATCGCCGTTTCCGCTATCGAGCGACGGTTATAATCTGTTGTCCATTTCCACCGCGCATTACTCCCGGTACAGCCGCT  
GATTCGCAACAGCACGGTTACGGTCTGCATATTCACCGGGCCAGTAACCCGCGCCTTTTCGGGGCGGGATAAGCGCGCTGAT  
TTTCTTACGCCGAGTTCATCGTGACAGAGCCGGGTGTCGTAAGCGCCGCTGCGGATGCTGCCCTGATTTTTCTGTGAGTCT  
GCCGGATAAGACCCGGGAAGGCTTCTGAGTCCGTACATTGTTTACGCGACAGGTCTGCACAGATGATTTTATGTGTGTTGCT  
GTCAACGGCCAGATGCAACTTTCGCCATATACGACGGCGTCTTTGCCGTTTGTGACTTTCATTTCGCTTACCAAAAGAC  
CTTACAGCCCGGTGGAATCAATCACCAGATGCGCGATTTACCCCGGGTGAACGTTTTGAAACTGACATTAACCGACTTTGCGC  
GCTTGTGACACTGGTGAATCCGGGCAGCGCAACGGAACATTCATCAGTGTAAAAATGGAATCAATAAAACCCTGTGCAGC  
CCGACAGGTCAGCCTGAACACGCGTTTAAATGACCAGAACGGTGGTGTGATGGCGAGATCAGAATAGCGCTGAGGTCTTCCCG  
TGATGAAGGCGTTGCCGACTCATACCAGGCCTGAATAGCTTATCATCCAGCCAGAAAGTTATGGAGCCACGGTTGATGAGG  
GCTTTATTGTAGGTGGGCCAGTTGGTGAATTTGAACTTTGCTTTCGACGGAACGGTCTGCGTTGTGCGGAAGATGCGTGA  
TCTGATCCTTCAACTCAGCAAAAGTTCGATTTATTCAACAAAGCCGCGCATGGCTTCAGAACCATCAGAAACAAACGCTATACC  
GGCGATGGAGGCATTGACGGCCAGGTAATAATAGGAAAATATCGCTATCTTATTCAGGCTAAACGCTATCGCGGCCATATTGCT  
TTACAGCACGTACAGGAGTTCGAGAAGTTGCTTAAACGTCATAACTGTCGCGGTCTGTTTTGCCATACCCGGGAAAACCGGCG  
CAGGTTCAAATCTGTGAGTATTGCCAGTGAACGGATGGAGATTATCAGCGGCCAGCGCCTGATAGATTTGCTCACGCCGGC  
AGCTCCTTCACTATCGCAACCGCCCCGACGATGATGAAGCGTACCGCAGCAACACTAGAAACGAGCACCATTGTTAAAG  
ATGCCGGTAAAGAAAATCGATACCATGAGAGTTAATTAATGAAGTCAGTAACTATAGAAGCAAAAACATTTGCTGAAATGTTA  
GGAATAACAGAAGGTGAATTAATCTTTGCCATTAAGAAAACCTGGCACATTCAAAAACAAGACCATCCCACAACCTCATGAGCC  
ACATAAATCAATAATAGATTTTTATATTACAGACGTAATGAGTTTATAGAATCACTAAAAGACAAAGAGAACCGGTAATGACTC  
CAACTTACTGATAGTGTGTTTATGTTTACAGATAATGCCGATGACCTTGTGTCATGCAGCTCCACCGATTTTGAGAACGACAGTGACT  
TCCGTCCCAGCCTTGCCAGATGTTGTCTCAGATTCAGGTTATGTGCTCAATGCGCTGAGTGTAACGCTTGCTGATAACGTGCA  
GCTTTCCCTTCAGGCGGGATTTCATACAGCGGCCAGCCATCCGTATCCATACCACGACCTCAAAGGCCGACAGCAGGCCCCAG  
AAGACGCTCCAGCGTGGCCAACGTGCGTTACCTAACAAATAAACCTGTTTAAATATCCAGATAAAAACATTCATCTGGGTCAA  
TGAGTGATACAGTTTCACCCATAAGACCCAATGGAGGCAATATGTCTGAATTTGAATTACTGGCGCAGGATCTGCTTGAGAAA  
GCAGAAGCGGAAGAACAACCTGCGACAGGAAAATTATAAAAAGCTGCTCGGGCAGGTGCTGGAAATCTATGACCAGAAGTAC  
GTGGCTGAACTGCTTAGAAAAGTTGGTAAAAATGAGTGGAGTTCGCGAGACTCTTAATCGCTGGATTAATGGTAAAGTGTCTAC  
CTAAGACGCTGACGTTAGCCGAAGAGGAACTTCTACGAAAAATGCTTCCGGAAGCGCCTGCACATCACCTGACTATGCCTTC  
CGGTTTATTGACCTGTTTGTGTTGGATTGGAGGTATACGGAAGGGCTTCGAAACCATCGGTGGCCAGTGCCTTTTACCAGTG  
AATGGAATAAAGAGGCTGTGCGCACATATAAAGCTAACTGGTTTAAACGATGCTCAGGAACACACTTTCAATCTCGATATTCGG  
GAAGTCACGCTCAGTGATAAACCTGAAGTACCTGAAAACGATGCCTATGCTTACATTAATGAGCATGTGCCGGATCATGATGTA  
CTTCTAGCAGTTTTCCCTGTCAACCGTTCAGCCTTGCGGGCGTAAGCAAGAAAAACTCGCTCGGGCGCGCGCATGGTTTTCG  
AATGTGAGGCTCAGGGAACGCTTTTCTCGATGTGGCGCGTATTATACGCGCAAAAAACCTGCCATCTTTGTTCTTGAAAAC  
GTTAAAAACCTGAAGAGCCATGACAAGGGTAAAACCTTTAAAGTCATCATGGATACCCTCGACGAACTGGGCTATGAAGTTG  
CGGATGCAGCTGAGATGGGCAAAAACGATCCTAAAGTTATCGACGGAAAGCACTTTTTACGGCACTGTTGCAAATAGTCGGT  
GGTGATAAACTTATCATCCCTTTTGTGATGGAGCTGCACATGAACCCATTCAAAGGCCGGCATTTCAGCGTGACATCATTC  
TGTGGGCCGTACGCTGGTACTGCAAATACGGCATCAGTTACCGTGAGCTGCAGGAGATGCTGGCTGAACGCGGAGTGAATGT  
CGATCACTCCAGATTTACCGCTGGGTTACAGCTTATGCGCCTGAAATGGAAAAACGGCTGCGCTGGTACTGGCGTAAACCTT  
CCGATCTTTGCCGTGGCACATGGATGAAACCTACGTGAAGGTCAATGGCCGCTGGGCGTATCTGTACCGGGCCGTGACAG  
CCGGGGCCGCACTGTGATTTTTATCTCTCCTCCCGTCGTAACAGCAAAGCTGCATACCGGTTTCTGGGTAAAATCCTCAACAA  
CGTGAAGAAGTGGCAGATCCCGGATTCATCAACACGGATAAAGCGCCCGCTATGGTCGCGCGCTTGTCTGCTCAAACGC  
GAAGGCCGGTGCCCGTCTGACGTTGAACACCGACAGATTAAGTACCGGAACAACGTGATTGAATGCGATCATGGCAAACCTGA

AACGGATAATCGGGCCACGCTGGGATTTAAATCCATGAAGACGGCTTACGCCACCATCAAAGGTATTGAGGTGATGCGTGC  
ACTACGCAAAGGCCAGGCCTCAGCATTTTATTATGGTATCCCCTGGGCGAAATGCGCCTGGTAAGCAGAGTTTTTGAAATGT  
AAGGCCTTTGAATAAGACAAAAGGCTGCCTCATCGCTAACTTTGCAACAGTGCCGATTTACGTGCATAGCCGATTTTCATTCTT  
TTCTCGCTAATTAGTTATGGGGTTATTGTTATGTTGATACAGTAACGAGTTTTGTTACATGAGGGGAGTCATTTTTCGGGAGAA  
GTCAGGACTTTTCAAGACTGTCACAAAACCATCGTTTTTGTATACATTAATTTAACCAATAGTTTGCAGATCAAATCGTCTGTA  
ACAGCCTTTCTGGCTGTTTGTATATAATCATGAAAAAATGGTGAGTAGAGTTTCAGGGTAACAGGGGATGCTTATGTCGGTTTT  
CCACAACCTGGCTACTTGAGATCGCATGTGAGAATTACTTCGTCTACATCAAACGCCTTTCCGCCAACGATACCCGCGCAACAG  
GTGGTCACCAGGTAGGGCTTTATATCCCTTCAGGTATCGTTGAAAAACTCTTCCGTCTATCAACCATACCCGTGAACCTGAACC  
CTTCGGTTTTTCTACCGCACATGTGTCATCGCATGATTGCCCTGACAGCGAAGCCGGGCAATTTATTATAACAGCCGTCATT  
TTGGTAAAACCCGGAATGAAAAAGGATTACCCGCTGGGGTAGAGGCAGCCACTTCAGAATCCTGAAAATACAGGGGCTC  
TGACGCTCCTGGCTTTCAAGCTTGATGAGCAAGGGGGGACTGTAAGGAAGTAAATATTTGGGTATGCGCCAGCACTGATGAA  
GAGGACGTCATTGAGACCGCTATTGGTGAAGTTATACCCGGAGCGCTTATATCCGGCCCCGAGGACAGATTCTAGGCGGAC  
TATCTCTACAGCAAGCGCCAGTAAATCATAATATATTCTACCTGAAGACTGGCACCTGCGCTTTCCGTGCGGAAGTGAAATTA  
TTCAGTATGCAGCCAGCCATTATGTGAAAAATCCCTTGATCCGGATGAGCAACTTCTTGACCGCCGGCGCGTGGAGTACGAC  
ATATTTCTATTGGTTGAGGAACTGCATGTTCTGGATATCATCCGAAAGGATTTGGCTCTGTGGATGAATTTATTGCGCTGGCC  
AATTCTGTCAGCAATCGCCGTAATCCAGAGCCGGGAAGTCTCTGGAAGTGCACCTGGAGCATCTATTATTGAGCACGGCCT  
GCGACACTTTGCGACGCAGGCCATCACAGAAGGTAATAAAAAACCCGATTTCTTTTTCCCTTCCGCAGGGGCTTACCACGATA  
CTGAGTTTTCCGTAGAAAATCTGCGCATGCTGGCAGTCAAGACTACCTGTAAGGATCGCTGGCGTCAGATACTGAATGAGGCC  
GATAAAATTCATCAGGTGCATCTGTTTACACTCCAAGAGGGGAGTTTCTCTGGCTCAATATCGGGAGATGCGGGAGTGGGTGT  
CAGATTGGTCGTGCCATCATCGCTGCACAAAAATACCCGGAGGCGGTGAGAGCTGAGCTAATGACGCTAGGTGCGTTTTATT  
GCTGAGCTGACAGGGCTTTACGCAGATATTCCATAGATTATCTCCCGCATAAATACCCGGAGGAGCGATCAGATTGTTCAA  
CCTTGACGAATCGGCATTAACCGCTTTCCAGGATATAAGGTTCAAGCAGTTTGGCTACGGCTTCAAACACGGGCACCACTACG  
GAGTTACCGAACTGCCTGTACGACTGAGTGTCTGACACAGGAATGCGAAAAGGCCTGCCATCTACTTTTTCAAACCCATAAG  
GCGCGCGCACTCTCGTGGAGTCAGCCTGCGGGGCGGATGCGCCTGATTTTCTCGTTGCGGAAGTCTGTTTCACTGTGGCC  
ATATCCAGCCACGGTCTATCAGAATTTAGACCCGCTTTGTGATAGCGAGCAGAAAGCGTACGGGCAATGCTTTCTTTATTT  
TCAGGATTAACGAGGCCAAAACCGAATCCGTTACCCTTAGCTGCGTGCTTTTTGGCGTAGTTATAGAGATACTCCAGAGTTTC  
GGCGTCAGTATATTTGCTGTCAACCACGGGTTCCAGCAGTTCCGCAAATGACGGACGCTGTTCCGGATAAAAACGACTAAT  
ATCGCGCAGGGTAAAGCCCTGGTGAATGTTTCAAGATCACGACGGAAACCGACCAAACGATACGTTCTCGGTGCTGAGGTAAA  
AAGGGCACTGTTGCAAAGTTAGCGATGAGGCAGCCTTTTGTCTTATTCAAAGGCCTTACATTTCAAAAACCTGCTTACCAGG  
CGATTTCCGCCAGGGGATCACCATAATAAAATGCTGAGGCCTGGCCTTTGCGTAGTGCACGCATCACCTCAATACCTTTGATG  
GTGGCGTAAGCCGTCTTCATGGATTTAAATCCAGCGTGCGGCCGATTATCCGTTTCAGTTTGCCATGATCGATTCAATCACG  
TTGTTCCGGTACTTAATCTGTCGGTGTCAACGTGACAGGGCACCGGCCCTTCGCGTTTGAGCAGAGCAAGCGCGCGACCAT  
AGGCGGGCGCTTTATCCGTGTTGATGAATCGCGGATCTGCCACTTCTTACGTTGTTGAGGATTTTACCAGAAACCGGTAT  
GCAGCTTTGCTGTTACGACGGGAGGAGAGATAAAAATCGACAGTGCAGGCCCGGCTGTGACAGGCCCGGTACAGATACGCC  
CAGCGGCCATTGACCTTACGTTAGTTTTATCCATGTGCCACGGGCAAAGATCGGAAGGGTTACGCCAGTACCAGCGCAGCC  
GTTTTTCCATTTAGGCGCATAACGCTGAACCCAGCGGTAATCGTGGAGTGATCGACATTCACTCCGCGTTCAGCCAGCATC  
TCCTGCAGCTCACGGTAACTGATGCCGATTTTGCAGTACCAGCGTACGGCCCACAGAATGATGTCACGCTGAAAATGCCGGCC  
TTTGAATGGGTTTATGTGCAGCTCCATCAGCAAAGGGGATGATAAGTTTATCACCACCGACTATTTGCAACAGTGCCGGTCG  
CCGGGAGTCAGCAGATCGACGTCAACGCCGAGCAGCGATTTAGTTCTTCTTCAAATCGCCAAAGTCCAACAACGTGGCAC  
CGGGCAGCGCATCGACCAACAGGTGAGGTCGCTGCCATCCCGGTGCGTGCATGCAGCACCGAGCCGAAGACGCGCGGG  
TTCGCGGCGGAAAGCGGCCTACCGCTTACGCACTGCGCTTCGTTTATGTCAAGCACAACAGACGGTCGCATGCGCATCC  
TTTCTTATCGAAACTCGTTGAGATGATATGCAATCAAGAATAGAATTTCAAGAAGTACAAAGTAAACGCGGTGGTTAATATCCT  
GTACCCACGGATTGCCCTTAGCGCTGCCTATATCGGCTAAAGCACTCCGGTAGCTTGATTACCCACGGCCACGGCAGGATC  
TTGGCCGTCGCAAGCGCCAGGGGAAAATCTTCAAGCTGCAAGCCTGAGTGATTTTATGTGCGTGTAAATCCATCGCCAGATGAT  
TTTTGTGAAGAAGAACTCGCGCTCGTTCATGTCCGGGCGCGCTCCTGGCCCTCCGTGCCAACGGCCAGCAAGTAATCGGCC  
TGAATTGGCAGTATCAGCGCGCTAGTAAGTCATGGATCGCCGTTGCGGCAGTCTGCGCGCCAGATTAATTACCCGGTCCA

ACTTCAGTTTATCCTGCTTGCGCTTGTGCGGTCTGCTCCATCAGATTTTCATGGCCCCCTTCTTCATGCTCATGCTCATGGGTGTGT  
TCTTTTCCGGTATGGCTCTGTTCCGCCTGAGACGTCTGCGGCATGGCGTAATCGTCGTAAATGCTGCTGTCAAAGTCGTAGTCT  
GATGCTTCGGCATAATGCTCGTAATCGGCATACTCCTGCGCGCTCCACTGCTGATCGTCGGCAGCAGCATAATCATGGGCCAGC  
TCTGCATCATTGCTGTGCTTCATGACGCCGAGGCCAACGGAATCATCCATAGGGTTCTGCTTAAGATGAAAGGCGTCTCT  
GCGTTGCTCACCGGCTGATAATCAGTGCCGGTGTGTCATGTTATGTTTCATCGGGTTTCTGGTTAAACGCCATGCTTTCCCCCGTG  
GCTTCTGGCAGACCTTTTTTCAGCTGATCGGGTTTCTAAACTGGTATCGCGGCCAATATCCTTAAACCTGGCCTCAAGCCAAA  
GAAACGGTCAATTTCTGCGGCCGTGGTTTTCGGGCTGTGCGGGCTCACGCTCGATGCCAAAGATTTTTTATCGTCGGTAAAAA  
TTTCCACCTCATGACGCGCACGCGAAATACCAACATAAAAAACGTCCTTAGAAGTGGTAAGCGATTTGGTATCTATGTTGAACA  
ACACGCGATCACAGGTAAGCCCTTGGGATTTGTGGACGGTGGTTGCATAAGCATAGGAAAGATAAGAAGCCTGTTTTTTGTC  
CAGCTCAACCGTGCGCCCTTTTTGTCCTCAAGCGTCAGTTTTTACCCTCCACGGTTTTTACCCTGAAGCGGTGCGCGTTGG  
CAACGTCCAGCGTTTTATCGTTACGCGTTACCATAACCTTATCGCCGGCGCCAGTTTCGGCGCTGACTGCCTGGTATACAGACA  
GCTTGGTGTGTGTACGCGGGCTGAAAGCGATCTGCTCACCGCTGCTGCTTTCAACCGTCAATTTGTTGCCGGCCCGGTATCA  
AGAACCTGGTAAGACTCGCCCCGCTTCATAACATTTTTGTAATCCTGTTGCGGGATAATGATTTGCCCTTACTGAAATAACGG  
CTGTGCGGGCGTTCCGCCTGTGTGAATCCACGCGGTCAAGTAGCGTGAACGTTTCGCCGGTTCGGCAAGCCCCAGATTGC  
CCCGGATGTAGTCATTGAGGGTTTTGCGTGAGGCGTTCGTACCAGAGATTATCAGGGTGGCATCCTGTTGTTCTGAGGACAG  
AGACAGGTAGCGATCGGCAAGTTGAGCGAGTCGGGGCGCTTCTTCTTCAGTTTCGTTACGCGCGGTGATATTTTTCAGGGCG  
CGCGCGGCATTACCTTCAGCGGCATACTTAACCGCCTCAAGCAAACCTTCATTCTTCTGTGCTGAATGTCTTTCATGTAGCTG  
GTCTGCATATCTGCTTTAATCAGCTGCTCAAAGGCTTACCGGCTTCTACCGCTTTCGTCTGTGACGTATCCCCAGGAATACCG  
CGCGAGCGTTATGCTTCTCGATCACCTCCATCAGCTGTTTCATCTGTGCGGGCGGGTATAACCCCGGCTTCATCAATGAATACGA  
CTGATTTTTTCATCCAGCTTTTTATCCTTCGCTTTGAGGAAAGCGGCAACGGTGCGGGCCGGTAATCCATCATCTTCAAGCGCTT  
TTTTCTGTGTCCCATAGGGGGCCAGCGCCGTGACCTTCAGCCCTTGACTCCAGCAGCTCTTTAGCGGCCATCGTCATATAGC  
TTTTACCGGTACCGGCGTAACCATGTGCGGCCACAAACCGATCTTTGCTCGTCACAATTTCTGTAACCGCGCGCATCTGCTCCT  
TCTTGAGGGTTTTTCCCGCAAGCAGCTGGCCTGCAATCTCTGCGGTGAGCTGTGCGGGCATCTGCCCCCGGCCGCGTGATTC  
GATAGTCAGAATGGAACGCTCAAGGCGAATACCCTCCACGGTAGTGACGCGGTGGCTGGTCTTTTTAAGCCTGCCGTTTTTAA  
TACCATCATCTACCGCAAACGGGCTTTATCCGCACGCATCCCGCTATTCTGTCAGCGAGTCGATCCACTCTTTGCGCGTCAGAG  
TTTCGGCCATAACTGAAGCACCGACCTTCAGAGTTGATTGATACCGGGCTTCGCCCTCGATGATGGCGCCCTTCTGTACCGCC  
TTCAGGTACGCTTTTTCAACATCGGCTATTGTGGCATGGCCAGCACCTGCTTATTAGCGATTTGAATCAGCTTCTGGCGTTCA  
AAGCTGGCATCGCGCTCTGACAGCGACTTAACTGCAAACCTGGATAGCCCGGTCAGCTTTAACCTCCGGGCTGGTAAATCCG  
GGCCATGTTGCGCGCTATATCAGCCTCCAGAGGTTTACCGTGTCCCTGCCATTACGGTTATCAAATCAATGCCGAGCGTTT  
TGCGCGGGCTGGCCATTCTGGTGAATTTCTTACGGGAATGCTCTGTTTTCTTTTACGCGTAGCCATCGAGACGCGGCTT  
TTCGTCTGAGCATCGGCGGTTTTCCCGCTCAGACCCATTGCAGCGAGTCCCTTTTTCAATTTGCTCCGACCGGCGGGAAAAAG  
CGCGAATCTGTTTCATCTGAAAAATGGCCATATCGAACGTGTTATTTTTGCTGTTGTAACGCAGCTCATAACCGGCTTTGGTCA  
ACTCCAACGCCAGCTCCTGTTTGTAACATCGCCAGGTGCATTTTGTACGCATCAGCTCATCATTTTTGAGCGCGCGCCACT  
GGCCGTCTCGCGCTGGGTGATGTTTCATGACAAAAGCGTGTGTGTGCAAATCAGGATCTAGCGCCCTGGAAGTTTCGTGGCG  
GAAAGTAGCGACGACAAGGTTATTGGTATTCTGGGTTACTGATTTCCCTGGCGAGTTGTCCGGCCTGCGCGAGTTTTTCA  
GCTTCACGCACAGCAGCGCAACAGCTTTTTTCATGAGCCTCGATAATGGTTTTATCGCCGTGTATCAGCGCCTGCATGGATACC  
CCTTTAGGCGCTGAAAACGTCAGGTCGTAGCCAGACGCTCTTTTTTGGCATCACCCACGTGTCGCTGCATATGCGTGAAGGT  
ATCTATCTCTCCGACAAGCAGCTCTTAAACCGGGCTGATTCAACGTCCCCGATAAGCCGAGGGCTTCAGCTCCGGTTCCCT  
GCCAGGACGTGAATGATGAATCCTTACTGTAGTAATCATCTTTGCATCAGAGTAGTAGCCACAACGCTAGTGACGTTCTGGC  
GGGTAATCGTGGTTATATCAAGCATCAGATCTCCCTCAGTTCAATGCCAGGAACAGGGTTTTTGCATGGTATTTAACGTGTTT  
AGCCTTGAACCTTAGCGACGGGCATATACCAGGCAACGCCAGATAGCCGGTGAGGTTTGGCAACATTGATATTCGGTAGGC  
GTTACGGCACGAACAACCTTAAACGTGCGCGGCTTTACGGACAATCCAGGGCTTCTGAGGATCGGATTTTACGCTCAACTTC  
GCCTTCTATCTACCGAGTGAGCGCGACATTTGATCCAACGTTTCATCACCGAGACGGCTGCCGCCAGCACGATGTTAGAAC  
GCATGTTAGCCAGAATTGTCTGAGCCATATCCCGACCATAAACCTTAAACAGCTGAGAATAGGTTTGATAGCCAGCATAAACAC  
ACAGACCGCTTTTACGCCCTTTGGTCAAGTGCATCGTTGAGGTTTGGCAGAACTGGAGTGATTCCAGCTCGTCAATAAATACA  
TTAATGCGGCTTTCTTTTTTACCCATACCCAGCACGATAGAAAAATCGAATCCAGCCAGCAGGAAATTAGCGGATTAAGTGA

CCTTTTCATTTCTTCTGCCAGGTGATAAACAGGGTTCCTCCGGCTTTCCATCATCAAGCCAGTCACGCAGGGAAAAATTACCTTC  
CGGCATTTTCAAATGTGGGGCAAGATTCTTACTGAGAACAAATCGCGCGCTTCCAAGTCTTTTTTCAGACCCGGAAAAAATAG  
CTTCGGCAGGCGTCCCATTAATAATTCTTTAATTTTTCTGGTCAACGTTACAGGCCAGTGAATAACTTCTTCCATAGTTAC  
TGTGCTGTATAGGCTGTGAAGTTTTTCGAAACTTCACTAAAAATAAGACGGCCATAGCCGAACCATTCTTCAGTAGCCATATC  
AGGGCTTTCCTGAACAATAGAGTTCACTAACGCTCGTAATCATATGAACGGCGAATTTCAATTGAAAAACACCCAGCCTTCAG  
TGCGTTTATCATAGGCGTTTAAATAACATCGCCGGGACGATAGAAATTCTTTAAGAACCCCCATTTGGATCTAAAGCAATATT  
TTTGCCGCCTCTAATGATGCTCTTAAATAACAGTTCATTGAAAATTGTGGTTTTACCAGTACCGGTTGTACCGGCAATCGAAAA  
ATGCAAGTTCTCAGCGTATGTAGGTATGGGGATATTAGCCACGGTAACTGGTTGACACCTCTTTCGCGTGTTTTATCAGCGAG  
TGTTCTGGCGCAACAAGCTCTGTACCAGATAAATCTTTTTGAATCTTTCGCCTTTAAACACGCGTGATTTATCATAAATGATA  
AAAGCGATCAGACCGCCAACACCAATAAACCAGCCAGCAATTAAGCTGACCATAAAGGCCATAGCGAAAAAGTATTCTTAA  
CCAGATACGGAATCAGGTATTTAGCCGTGGATGGATCAATACCGTAGGTAAATTTTGCAACTAGAAACCATACCATCACTGGAG  
GCAAAGTAATTGCAAATAAAAATGCTAAGCCTCTTCTCTATCGTCCATTTTCAGCGCTCCTTTTTTGGTTCCAGACTTTGTAGC  
CGTTACGTTCAACCTCTGCTTTTTGCCGCTTTGGTTTTGCCGGTCTGCTATCGAGCGCAGGAGGATTAGCGTTTCAATAGCG  
AGTGATTCATGCAACATCATCTGTCTGCCGGTGGGAATTTACGCCAGATAGCGTTTCGGTTATTGCCTTCAGCTCATCGCGC  
AGTGGGCCAAAATCCGCATCTGAAGCACGGTCAAAAAGATAATCCAGTTTTCGATTTACGTGCTCAGCCGGTCGGCAACTAT  
TTTCAACCCGGACTCCCGATCACCTGGGCCAGCTTCAATGCAGCGCCGAGATAATCTGACCGATTACCTCCTGAAACCAGGT  
CTATATAGGCCAAAAGTTCATCTGATACTTTTTCGGTATTATTGGCATTTCAGTCTCACATTGTGCATTTCTTAAACAAAAAATT  
GGGATCTAACAAAGCTGAAATCTTAGTATTACCAAAGTAATAAAGCAAATCATTATAAAACAATGGGTATTGGGTGTTTTAAT  
ACCTAATTATTACCGAATATTGACGCTATTTATTTTTTATCTTTTAAATCAGTACGATAGCGTGATTTATCGCGCTGCGTTAGGTG  
TATAGCAGGTTAAGGAAAAAATCATCTTTTTTGGTAGGAGCGACCTCCGTAGGTTAAGGGTCATTTGGCTAAAAAGCGTCC  
TATTCTTTGATGGTCATGCTTGCATGACCATCTGAGCAACCAAAAACACTACAGATAAACTACAGAGAACTACAGATAAACTACA  
AAAAACGATTTACCTTAGCGTTGTCAGACTACTAATAGACTACAAGGAACTACAAAGAACTACAAAGAACTACAAAGAA  
ACTACAAATAGACTACTAAAACCGTGGCAGACTACTAATAGACTACAAGAAACTACAAATAAACTACAAAACCTGGATTGACC  
CCTTCTTACGAGTGTTGTAGAGTCATCTTACATAACGGAGGGGTTATGAATAAACCAGCAGATCTGAAACCCCGCAACTTAT  
CGGCTGCTGTCAGATTGCGCCTAAATGAAATCGAGAACTGGCTGGACAGAGGGCTAACCGCGCATGAAATTGCTGAAATCCT  
CGACAGCGAATACAGCTTTTCGGTAACAGCCAAGGGCTTGAGATGGCACTGTATAGAACCGCGCAAAACCGAAAAAATGT  
ATTGCACAATACACATGATAAGAGTAGCGCGAAGGGTGCAGCGGAAAGTGTATTGCACAATACACAACCGTCTGAGCCTGAA  
GCGCAGGAAAGTAAAAAGCAGAGAGTCCCGGCATTATTGATAAAGAGTTCTTCAATAAAATCGGTGAGGATTTCAACCCTA  
AGAAGTTCAACAAAAAATTCTGAGGTGATTTATGAAAGTAGCGGTAATTAATTACAGTGGCAGTGTTGGTAAAACATTAATTT  
CATCTTACCTGTTAGCCCCGCGCCTGACTGGTGCAAAGTTCTATGCGGTAGAGACTATCAACCAGTCTGCTTCCGATCTGGGTA  
TTGAAAATGTGACCAGTTTTAAAGGTGACGACTTCTCACGTTTGATTGAGGATATTGTTTTTGAAGATGCAGGCATTATTGATA  
TTGGCGCGTCAAACGTTGAAGCGTTCCTGATGGCTATGTCTCGCTTTGACAGTGGCGCGAACGAATTTGATAAATATGTAATCC  
CGGTGACGCCGGATAATAAGGCGATTGATGAAAGCCTGAAAACGGCACACACGTTAAGTAAAGCGGGCGTGAGCAGCAAG  
AAAATTATCTTTGTTCCAAACCGTATTAGTCCAGACAGTGAAGTAGAAGATGTGCTGGCGCCGGTGTGTTGAGTTTGTCAAAGA  
AACGAAGATTGGCAAATAAGCAAGAAGGCTGTTATTTATAACAGTGAGTTTTTGAATATCTGGCGTTTACCCGTATCTCATT  
CGAAGTATTGACCGCTGAAGATCCAGAAGAATTCAAATCCCGTGCAAAACAAACAACCGATGCTGACGAGCGCAAAAAACT  
GGCACGCCGTTATACATACATGAAACAGGCGATTCCGGTAAAAGCTAATCTCGATAAAGCATATGCGGCTTTAATGGGAGAAT  
AAAATGGAAAAGCAGCCGGATAAATTAGAAGTTCTGATGGACTGGTTTTTAGGTGACGCGAAGGAAATCACCGCAACTCAG  
AAAGAAATGACGCAGAACTTTCTGAGCTTTTCGAAAAGCTGGCAAAGACACCGAAAGTTTAGGAGAGACGGCAGACTC  
TTTTAAACGGGCTTTAGTAGAAAACCAGCGTTCAATTAGCTGGCAATTAGTGATGATGCTAAGGCGCGCGAGGAATTTCTAA  
CTAAATTCGCGCGCGCAGGCGTCCAGTGCTGAGACGTTTACCCGTGAGATCCTTTTTATTACAGCTGGCTGCACCATCGTG  
GGCGCCGAGTAGGCGCCGCGATAGCGATACTTTACTGAGATAAAGCAAACCGGGCGTGTCCCGTTTTTTTTGTCAAGCGG  
AGCGCGGAGGCCGAAGGCCGGAGGCATTAGTGCCCGCCGCCGCGTAAGCGGGGCGAGACGGGAACCGGCTCGAAGCG  
CAGCACGGCAGAACGGCCCCGAGGGGCAATGCCGTTTTAATTCATCGTGACAGTCGCGCGTGACCATCACGGGGAGAAA  
AATAATGAATGACCGACAGCGAGAACTGGCCCGTATACGCCAGGCCCGCCGCGCGGCTCAAGGAAGAAGGCACAA  
GCGTGACAGTCACGTAACAAAACAGGAAGAAGCAATGTTGCAGGAGCTGTGCCGGTTCGCCGTCTGGACGAACGCCTT

ATTCAACGAACGAATTTTTCCAGCTGCTGCTTATCCGCAACTGGCAGCAGTGGCAGGAGCAGAAGGCACAGCTGGGAAAAT  
GCCAGGCTTGCGGAAAGCTGAAAGCGGAGGGGGGGTGCAGGGTGAACGGAAAGGCGAAACCTTTAACTGCTGGCTTGC  
CGTCAAGCCAATGAACTAAATTTGTAGTGTATTGTGCAATACACATTTACACAGAAACAAAACCACCGCAATTCCTGGAA  
CCGGATACCTACGGCTATTCTGGGTGAACGGTACTTTTTGCACCTGGGTGCGCTGAAAAAGCTGAATATGCAGGGTGACGT  
TCGCGTGTGTTCTGCTTTGTAGACTGAATGCGCCAGCTATACGCTGACTGCTTAACTGGTAAAGTTCTGCAACCGGCAC  
TGACCGGAAAGCAAGGCAGGGAAGACCTAAGCCAGAAACCTTGACTGCTCCCCGCCCTTCAGGGCGGGGATTGCGGATCA  
TGTTCTTCTTTTTCAGGGATTCAACGCAGACAAGAAAGGCTTTCAATTTCTATACTGTAACGGCCGCGCAGCGGAAGAAAC  
AAGCCCGTCAATCCGGGCTTGTTCCTTTAGGCGGCTCAGAAATCGCCTAAAGGCCCGCTTGCCGGGCAGTCAGTGCTAT  
TTAGTTTGTGTCAGCAGCTGGCTTAATTTTGGCCAGTGCATACGTCGATTGGAAAGCGCCTTGACGGCGCTGATTAGGCAG  
CTGTTGAACGCTTCGAGGCAGGCGCGCAGCAATAATTCTTTCTGAGATTGACTTCTTTTTTTCAGTTGGGAAGGGGTGGTA  
ACTGTAGTCATGCTTGCTCCTTAGTGAGCCGATATCGGCAATTTTTCGGGTGGCGGTGTTGCCTCCCGATGATTTAATTATCGG  
TGATTATGCTTTTAAAGTCAATACAGGTACGGAATTTATTTACCTGTTTTTATGCCCGTCAGGGCATGGAAGGCGACCGCGCCG  
GACTCCACCGGACACCGGCCGAAATCGCCGAAACTGCGGGACTGACCGGAGCAACAGGCCAACCCCTCCCTGCTAAG  
CCATAACCCAGCCCGCCGACGCAGCTGCCGACGTCCCCACGGGGTGCAGTGGGCGCCGCGCCTGCGCGCGG  
GTACGGCGGCCCGCTGCGGGTGCAGGCGCCGTAAGTGCAGTTAGCGGCCCGCGCGGCCGTTACGGGGGACACCGCA  
CAGTCACGGCCAGTGCCCCGCTGAGCTGCACAATCCACGATAACACAATAGCGCACTGGCAAAGGATGCCGACGCCTGAA  
GGCGTGGGCACCCGAAGGGGCGGGCGGCCGCTTGCAGGCCGCGAGTCCGGCGCAGGGTGTGGCCTGCCAAGCGG  
AGCGCGGAGGCCGAAGGCCGAGGCGTTAGCGGCCGCTGCCGCGTAAGCGGGGCGAGACGGGAACCGGCTCGATGCGC  
AGCACAGCAGAGCGACCCGAAGGGGTAACGCCCGGTGTGGCATCAGGATTTAGTGCAATGGCAGAACATGAGCTGGAGA  
GATCACCGCAAGCAGCAGCAAAGGGGCGGCACAGCCGCCCGATGGCTGTTTGGGATACCGGCGATTAATTAGAGCGGT  
GTTAATATCCCCGCGTTGCGGGGGACTAGTTTTAGCAAGTCATGTTAAATACGTGTCCATCATGTAAACTGAAATCCCCAA  
TAAACAGATCCCGCGCATAGGCTACGATGTAAAATATCGGGCTACGGATTCCGGAATATCATTAGTAGACCGCTATCATTCA  
GGTATTCCTCTGCAAAAGTTTTCTTCGTCCTTAGCTTCGCCATATAGGCATCTCTAAACAGGTGCAAATCAGTGCTATTAACAG  
ATCAACAAAGGCCACAAACGCCGCTTCGTTACCTTCTCGCGGGCTTGTAAAGCCGTTAATAAAATCCAGTTGATATGGC  
ACTCTGACGCCATACCAGACGGAATACCCTCCAATCTTGGAACATAAATTCTGGATCAGCCTCATTGCGTGTAACTCGCGGC  
AGCGCTCGTAAACTCCTCTGAGCTATCAAATCGGTGAGTGCAGCCAGGCTCCCGCAATGCTTCCGCAAGTTGATTTATGGT  
AAGTGCCAACATAAACAGAAGGGGTCGTAATATCAGTCATGGTGTACTCCTTAAAGCGCCGATACCGGCAATTTTTCGGGCGG  
CGGTATTGCTCCCGATGATTTAATTATCGTTGATTATGCTTTTAAAGTCAATACAGATACGGAATTTATTTACCTGTTTTTATGCC  
CGTCAGGGCATGGAAGGCGACCGCGCCGACTCCACCGGACACCGGCCGAAATCGCCGAAACTGCGGGACTGACCGGA  
GCAACAGGCCAACCCCTCCCTGCTAAGCCATAACCCAGCCCGCCACGCAGCTGCCGACGTCCCCACGGGGGTGC  
GCAGTGGGCGCCGCGCCTGCGCGCGGGTACGGCGGCCCGCCTGCGGGTGCAGGCGCCGTACTGCGAGTTAGCGGCCGCG  
CGCGCGGCCGTTACGGGGGACACCGCACCGTACGGCCAGCGCCCCGCTGAGCTGCACAATCCACGGATAACACAATAGC  
GCACTGGCAAAGGATGCCGACGCCTGAAGGGCGTTGGCACCCCGAAGGGGCGGGGCGGCCGCTTGCAGGCCGGCGAGTC  
CGGCGCAGGGTGTGGCCTGCCAAGCGGAGCGCGGAGGCCGAAGGCCGAGGCGTTAGCGGCCGCTGCCCGCGTAAGCGG  
GGCGAGACGGGAACCGGCTCGATGCGCAGCACAGCAGAGCGGCCCGAAGGGGTAACGCCCTGTGTGGCATCAGGATTTA  
GCACAATGTCAGAACATAAACTGGAGAGATACCGGCAAGCAGCAGCAAAGGGGCGGCACAGCCGCCCGATGGCTGTTA  
CTTGTCTTTGTGCGTAGCACTTTGATTAGGCCGTTACGGCCGTAATCAGAGCGGCCAGCGAGGTGATGATTTGCGGTAGG  
TTTTCGAGGATGGTAGAGGTCATATAGCACCTGTAGAGAAGTTGGCGGGGTGTGTTTTCCGACGGCCGCACTGTAACCGGGC  
GAATAAGGCAGGTTGTCAACAGCTTGAGCGAAGCGTCTGTTGACAACCTGCCGCGCCCGTTTTACTGCGGTGATAGGCGG  
AACGACCCACGCCAACGGAACGGCTTTATGACCGGGCAGCTGAGATACCGGCGAACCTGGCTGGCGGCTGACGCCAGCCG  
CCAAGCGCCAGCGCGGAGGGCAAAGCCCGGAGGCCAAGCGGAGCGCGGAGGCCGAAGGCCGAGGCCGAGGCGTTA  
GCGGCCGCTGCCCGGTAAGCGGGGCGAGACGGGAACCGGCTCGATGCGCAGCACAGCAGAGCGGCCCGAAGGGGTAA  
CGCCCGAGTCTGCCGCTGTTTATCTCTCGTTCCATCTGAAATCGGCGGTAAGGCCATTAAGGGGTGAGTTTATCAGGGAGG  
CGTTAGCCCCCATGTTGTTAATCATCAGGCAATATCGTCTTTGTAGCAGGCATAACCGAAGCTAAGCTCTGTTTTTATATAGT  
GCGGGCAAAGTCCAGGCATCGTGGCCGAAGTCTCATAATCTGCCAGGACGATTTGCGGGGCTTTGTGCCATTGCTGTACG  
GAAGAAAGCGGCAGAACAGGGCAGGGGTGCGACCAGTCAGTGACGGTGTGTCAGATCATATCTGCCAGACGCTCCAGGGA

GCCGTAAACCAGCTCTGTGCGCAGATCCGCCACCATGCGTTGTTTACGCAGTGATGCCAGATAATCAATCTCTTTGGTTATATC  
AGAATTTAAGCGGGTCTGGTAATCCATGATGTACTCCTTTGCGCGCCGATACCGGCAATTTTGCGGGCGACGGTGTTCCTCC  
CGATGATTTAATTATCGGTGATTATGCCCTCAAAGTCAATATAAGTACGGAATATGCATGCATAATTTTATATCTTGCAAAGCGTT  
CATAGAGTGCCTGAATCGCTTTCTGACAGCCTCAATAAAAAAAGGCGGGGATTCCCGCCTTTTTCTTACAGCTGCTTACGTGG  
CTTTTTACGCGTCATATAACGGTATCGCGCAGTCTACCGCGTACAAAAAGCACGCCAGCGCGCCGCAACCGTACAGAAACG  
CAAGCGGCTTATTATCGAAGTAGCTGAAAACCCCTGTCGCCGCACACAGGCCCAGAACAGAGACGCAGGCGCAGGTGATCT  
GCACCAGATCCCTGTATCCCGCACGAACGATAAACCAGGGCAGGGCAAGCGCAGCGGCGCTAATAATTAATGCGAGAGGGA  
CAAAAACGAGATAGTGATACATGTGAACTCCTTGATGGTTGCCGATACCGGCGATTGTTCCGGGCGGCGGTATTGCCACCCGAT  
GATTTAATTAGAGGTTTTGCGCGTCCAGGAGATTGACCTGAGCCGGGGTAACGTGAAACTTTTTCCCTTTATGGATCACGTTA  
TGCGGGGCGCTAATTTATCACTGATAAAGCTAACCAGGGTAACGTTTTTTACCGCAAATCCGCTCGCTAAACCATGCCACTTTT  
GCCGCTGGCCGATCCACTGGATGAACAATCACACCCGCCATGCTGCAACCCGTTGCGGGTTCGTCCAGCGTAATGCTTACCG  
GGACTGTATCCCGTAAAAAACTTAACCAGGCGGCACACCTGCCTGCGTAGCGGCTGCGACAACGCAAGCCCGATAACCGC  
TATCCGATTAATAAGCATTTTATTCCCTTACTCATGCTGATATCACCTTGCCAGCTGTTACCAGTTTACGAAATCACTTTTCATGA  
ATTTACGCCCATGCTCAAGCGTTGAATACACGTTGCCGATAAGCCAGTTACCAGCCGTTTTTGTCTCGGTATACCACCATGCT  
TCTGTCAGAGTAAGCAGCGGTTGCTATCCTCGCCCTTCTCATAGATCCAGATTTTAGTGACGTCTTTACCCGTTTCGTTGCTGC  
CCTGAATGGTAGGGTCAAAGGTATGTTCAATCTCTATATCGAAGTAACGCTGAAGGAAGTTAGTAAAGTGCATGACGACTCCT  
GTAAGCGCCGATACCGGCAATTTTTCGGGTGGCGGTGTCGCCTCCCGATGATTTAATTATCGTTGATTATGCTTTTAAAGTCAA  
TACAGGTACGGAATTTATTTACCTGTTTTATGCCCGTCAGGGCATGGAAGGCGACCGCGCCGGACTCCACCGGACACCGGC  
CGCAAATCGCCGAAACTGCGGGACTGACCGGAGCAACAGGCCAACCCCTCCCTGCTAAGCCATAACCCAGCCCGCCGC  
CACGCAGTGCAGCAGTCCCCACGGGGTGCAGTGGGCGCCGCGCCTGCGCGCGGGTACGGCGGCCCGCTGCG  
GGTTCGCGGCGCCGTACTGCGAGTTAGCGGCCCGCGCGCGCCGTTACGGGGGACACCGCACCGTCACGGCCAGCGCCCC  
ACTGAGCTGCACAATCCACGATAATGCAGGAGACGAATCATGATAGGAGGCTGAAGGGGAAATGAGCGGCAGCAGGGGA  
AGGGGTTGCCAAGCGGAGCGCGGAGGGCCGAGGCCGAGGCGTCAAGTGGCAGCTGCCCGGTGAGCGGGGCGAGACGC  
GTAGCGGCTCGATGCGCAGCACAGCAGAACGGCCCCGAGGGGTGACGTCCGGGGGTTGCTTTTTAAAGATTTTCGACCAC  
ATCAGTAAATCGTAGTGACACCATGAAGCAAAAGTATCGTGCAGACCAGAATCAACAACAGTAACAGCAGACCTTTTTTTCGA  
CGTAATAAAACCGGCCCAAAGCGCCCGCAAGAAGCACACTCAACACGATTTCCGTTATACTAATCGTATTTCATAATCTCTCAC  
GTTTCCCTTTTTAGAACTCTGCCACACACAGATAAAACCTTATAACAAGCTACAAAACCCGTTATTTCAGACGCGGTAATGCCTA  
GTTTTTTTGGCAGTATTTTCAGATGACAAAGAAACCTTATCCACTTCCCGTTACAAGGTGAATGATTGTGGCTTCATGCCCTT  
TAACAGAGTGGGATATTAACCTCACGCTGAATGATATGCGTCTCTCCATCATTTCCCGTCACGGCAATTAGGCCCTCTGTAGAAC  
AGGGGTTGATACTACTAATGTTGGTGTGTTTTCGGTTTTGTTTCAGCATCGCTGATCCTCAAATATCGGTTTGTGTTACGTCTGC  
CGTTTTGCGCTGGATAAGCGACTTAAAGAAATCCGACGCCTTCAGAATATCGCTATCCTGGAAGTCCGGAAATGTCGCTTCTG  
TCAGCTCCTGCGCCGTACCTGCCCGTATAACGGTTTTATCGCGGATCATCGTTGCTTAAACCCATCAGCCTGTTTTTTGCTGA  
AGGAGTGCCGAAAATAATCGCGTATTGGCCCGCTATCCTGATGAACAGAAGTATCCAGCGATGATTACCCTGTTTACGAT  
AGTGGTGATAGATTTGCTGGCCGTAGCGCTCCTGATCGGAATTACGGTAATCGAACATTAACAGTTCCAAAAGCATTAAACCGA  
TCTGGCAATTGCCAGGCGGTAGGGTGTGAAGTGTGCTAACATAGTTTCCCTGAGCGTGACAGTCACGATAAGGCGGGCT  
TTGCCCGCCTGTTATCAGTTAATCAATGGCACGATAAATACGATTCTGGCTTTCGTTCTCCAGCGTATTAACGTACTCCCGCAA  
CAGGTGATACCGTTAGCCATCGTTTTGTTTCAGTTCGGCTTTGCCTTCTTCATATGCCAGGCCGAAAAGTAACTGTAGGCATA  
CAGACAAACAATAATCCCTACTTCGCGCGCGCTGCATTACCTTCAAATAGTTAGGTAACGAGAGCCAAAGAGGTTGGGGC  
GCTTCATAAAAAACGCGCCATTGCTGGCCTGAAGGTATCCCAATACCCTCCCTGGTAGTCTTTAGCGTAACGATTTCAGAAAG  
GACTGAATGAAGTGATCTGCGCTGAAGAAAGCGCCACGAAATGCCGCAGGCATGAAGTTCATGCGGGCGTTTTTCAGAAATG  
TAGCGGGCGGTGATTTGATAGTTTCCATGATACTTCTCTTAAAGCCGATACCGGCGATGGTTAAGCGGCAGGCACATCACC  
TGCCACTTTTTAATTATCGTACAATGGGGCGTTAAAGTCAATATAAGTACGGATTATATTTACCTAATTTTATGCCCGTCAGAGCA  
TGGAAGGCGACCTCGCCGACTCCACCGGACACCGGGGCAAATCGCCGAAACTGCGGGACTGACCGGAGCGACAGGC  
CACCCCCCTCCCTGCTAGCCCGCCGACGCGGCCGTTACAGGGGACACTGAGAAAACAGAAAGCCAACAACACTATAT  
ATAGCGTTCGTTGGCAGCTGAAGCAGCACTACATATAGTAGAGTACCTGTAAACTTGCCAACCTGACCATAACAGCGATACT  
GTATAAGTAAACAGTGATTTGGAAGATCGCTATGAAGGTCGATATTTTTGAAAGCTCCGGCGCCAGCCGGGTACACAGCATCC

CTTTTTATCTGCAAAGAATTTCTGCGGGGTTCCCCAGCCCGGCCAGGGCTATGAAAAGCAGGAGTTAAACCTGCATGAGTAT  
TGTGTTTCGTCACCCTTCAGCAACTTACTTCTACGGGTTTCTGGCTCGTCAATGGAAGATGGCCGCATCCATGATGGTGACGTA  
CTGGTTGTGGATCGCTCGCTGACGGCCAGCCACGGCTCAATCGTAGTCGCCTGCATCCATAATGAATTTACCGTGAAGCGGCT  
ACTGCTGAGGCCAGACCCTGCCTGATGCCGATGAACAAAGATTTTCTGTGTACTACATTGACCCGGATAATGAGAGCGTTG  
AAATCTGGGGAGTGGTTACGCATTCCCTTATCGAGCATCCGGTATGTTTTCGCTGATTGATGTCAATGGCATGTACGCCAGCTG  
TGAGCAGGCATTTAGGCCAGATCTGGCAAACCGAGCAGTGGCCGTTTTATCCAACAATGACGGCAACATTGTGGCCCGTAAT  
TACCTGGCGAAGAAAAGCGGGCCTGAAAATGGGCGATCCGTAATTCAAAGTCAGACCCATAATCGAGCGTCATAACATCGCTAT  
TTTTAGCTCTAATTACTCTCTATGCCTCCATGTCGGCCCGTTTCGCGGCCGTAGTTGAGTCCCTTGCAAGCCACGTGCAACA  
GTATTCAATCGACGAGCTTTTTGTTGACTGCAAAGGGATAACGGCCCGCATGAGCCTTGACGCTTTCGGGCGCCAACACTGCGC  
GAGGAAGTCAGGCGACACACAACGCTGGTATGCGGGGTCGGTATTGCCCGTACTAAGACGCTGGCGAAGCTGTGTAACCAC  
GCTGCAAAAACATGGCCCGCTACTGGCGGGGTGGTTGCTCTGGACGATGGCGCCAGACTGAAGAAATTAATGAGCATCCTG  
CCGTTTTCGGAAGTCTGGGGCGTCGGCCATCGTACAGAGAAAGCACTCGCCACAATGGGGATCAAACGCTGCTGGATTTA  
GCCAGGGCAGATACGCGCCTAATCCGTAAAACATTCGGCGTTGTGCTTGAAGAAGCGTACGGGAGTTGCGCGGCGAGGCT  
TGCTTCAGCCTGGAAGAAAACCTCCTGCGAAGCAGCAGATTGTTGTGTCGCGCTCATTGGCCAACGCGTAGAAACCTGA  
CGGACATGCAGCAGGCTGTCACCGGATTTGCAGCGCGCGCAGCTGAAAACTGCGTAATGAGAGGCAACTACTGCCGCGTCA  
TAAGCGTCTTTATCCGTACCAGTCTTATTAGTGCGTGATACACAGTATGCCAATCAGGCAACCGAAAACTGACGGTGGCA  
ACCCAGGACAGCCGCACGATAATTCAGGCAGCACAAGCCGCGCTGGCGCGGATCTGGCGGGAAGATATTGCGTATGCAAAA  
GCAGGGGTTCATGCTGGCAGATTTTAGCGGGAAGGAGGCCAGCTTGATTTATTGACTCTGCTACGCCTTCAGCTGGCAGCG  
AGGCTTTAATGGCTGTTCTTGATGGTATAAACCAGCGTGGAAAGAGCCAGCTTTTTTTTTGTCAGGCCAGGGCATCGATAACTCC  
TTTGCCATGCGTCGTCAGATGTTGTCACCTGATTACAGCAGACTGGCGCTCAATACCAATAGCCACCATCAAATAATTACCG  
GCGCCGTACACGGGCCGTTAACCCTCAACCGGCCGAAACAAGTTTTCGGCACGTTTTTCGCGTTTTTCGGTAAAAGCCGTT  
TCCTCTGTATAAAAGATCAGCTAAATTATGTGATTGCACAATACATATATGTGAGGTTAGCAGTGAATTTGCCTACGCCGAAA  
CCTACGATGAACTTCAGAGAGCCTACGATTTTTTCAATGATAAGCTATTCAGCAACGAGCTGCCGCCATGCCTGATAACGTTGC  
AGCGTGAGAAGCGAACGTATGGCTATTGTTCTTTAAGCGTTTTCGTCGGCCGTGAGAGTGGGTACACGGTAGACGAGATCGC  
TATGAATCCGGTGTATTTCTCGATCAGAACCATAAAGGCCACGTTTTCAACTGTTGTCATGAGATGGTTCATCAGTGGCAATT  
CCATTTTGGCGAGCCTGGCCGCCGTGGCTATCACAACAAACAGTGGGCGGCCCGGATGGAACGGGTAGGACTAATGCCTTC  
TGATACCGGCGAACCGGGAGGCAGGAAAGTGGGCCAGAGCATGACCCATTATATTATTGCCGGTGGCCCTTTCGATATGGCC  
TGTGATGAACTGCTGACAGGCCATTTCCGGCTTTCCTGGATGGACAGGTTTTCCGCCTTACCAGCCTAAGCCTGGCGCTGTGCT  
AAGCCCTACAGGAAAAGGCTATATTGACGACGAGGAAGATGATAGCGAACACGAACAGGAGGTGGAGGAAGGGCGCGACC  
CGGTTGAACTCGACGACGAGATCATAGAGGCCATGCGATTTGTAACCCACCGCTGAAGCACCGGTGAACAAAACAAACC  
GGGAAAAGTACAGCTGCCCGTGTGTCATATCAATCTCTGGGGTAAACCGGGGATAGTGGTTACTGTGGTGGCGAGCACTG  
TAATAAAGCCGCTTAGTAGTCTAAAATAAAGTCTTTTCGGACTTTATTTTTTTTCCATTTCCGAGGTCGTGATGTTATTAATGC  
TGTACTTCGCGGCTTCTTTTAAAACAGTTTCAGCAAGGCTTGCTGGTATCCAGACCTGAACTAATTTAATGGTTTCGCCGTTCT  
CGGCTTTAAGAGTGGTGTCTGGTACAAATCCCAGATTTCGTTAACGGTGCTGGAAATGTTTTGCTTGGAACGGCCTACTCGC  
ATGGCTACGTCTGATGATTTCTCACCTTTGACAAGCACGGAATAGCCAATATCTGTTGTGATGTGTGCAAAGGAAGCCATTTGC  
GGCAGCAGCTGTTTCCATTCTGTTTCTGAAATTCTGTTTTTCTGAGCCATCTGTGGCGCCTCCGTAGTTTTGGTTACAGAAAG  
ATATACTCAGAATAAACAGGGGTCAATACAAGTACGATTTTTATAAATTTATTTTATTTGAGGGTGAGGCCCGGTGCGGCAGC  
AGCGCGGGCCTCGATGGTGGCGCAAGGTGCTGGCGCCATGCTCGGATTAACCATGAACCGTGAAGAACTGCGAAACTTG  
TTTTTCGCGTTCTGAGGGGTTGACCGAGCCGCAAGCGGCGCTGGTAAGCGATGATATGCACATATCCACAGGCATATTTTA  
AAAGGTATTTTATAGATTTTTTATCTTTTTAAAGTCTTTTAGAGCTATATAACTCATTGATTTAAAATCATAAATAAGTGTATCTCT  
GGGAATCCGCCACCTTGTATGGGAATTGGCCACCTTACTATGGGAACAGCCACCTTACTATGGGAATTAGCCACCTT  
GTTATG



>pQEB1\_inv3\_Tn5403

GGAATTGGCCACCTTAGACGAAACTGTAAAAAATGTATTTACTTGTGGTGTAGTGTGGAGAGTAATTTTTAACC  
CACAAAGGCAAGGCGCATGGATAAGTTGCTGAACAAAAAGATAAAAGTTAAGCAGTCTAACGAGCTTACCGAAGCTGCTTAC  
TACCTCTTCGCTAAAAGCAAAGCGCGTTCTCTGGTTATGTCTTATGCAGACGTATTTACAGCTTCAGTAAGCGAAGATGATGA  
TGAGATGGCTGTACTCGGTGACTCTACTTTCAAAGTAAAGGTGGCTGACTATCAGCAAATTTTTACAGGTAAGCCGTAACCAGG  
CTATCAAGGATGTTAAAGAAGGCGTGTGGTAAAGCCGTTCTGCGTAATCTTTTACCCGAAAGAGGGGCGTTTTGACTG  
CGTCGCGCGCCCTGGCTAACAGAGGCTGGCAGCCGATCAGCTCGTGGTATCTGGGAAATCGAATTTAACATAAACTCTGC  
GGTACATTTACGGCCTGACGAACCAGTTCACCACCTACTCGCTCCGCGATTGTGGCAGTCTTCGAAATCCCCGGACGATCCGC  
CTTTATGAAAGTCTTGCTCAATTCAAATCTTCAGGCTTATGGGTTACTACTCATGCTTGGTAAATGACCGTTTTCTTTGCCGG  
AATCCCAACAGAAGAAGTGGCAGAGTTGAAACGATCTTTCTTGATCCTGCACTCAAGCAGATAAATGAGAAAACACCTTTA  
CTTGCTAAGTATAGTATTGATGATTCAGGAAAATTTCTGTTCTCAATAATTGATAAGCAAATCCCGTCTGACATAAATCAGCAC  
ACATGAGCCTGTCATTTGACAAATTTTTGTCATGAAGATGGGCGAATTTCCACACAGCACCGGCGCCCGCAAGATGGGCGG  
ATTCCACACGACAGCGGCGCCCGCAAGATGGGCGGATTTCCACACTACAGCGGCGCCCGCAAGATGGGCGGATTTCCA  
CACGGCAGCGGCGCCCGCAAGGTGGGCGGATTTCCACACGGCAGCGGCGCCCGCAAGGTGGGCGGATTCTCACGCGG  
CAGCGGCGCCCGCAAGATGGGCGGATTTCCACACGGCAGCGGCGCCCGCAAGGTGGGCGGATTCTCACGCGGCAGCG  
GCGCCCGCAAGGTGGGCGGATTCCACGCGGCAGCGGCGCCCGCAAGGTGGGCGGATTCCACGCGGCAGCGGCGCC  
CGGCAAGGTGGGCGGATTCCACGCGGCAGCGGCGCCCGTAAGGTGGGCGGATTTCCACACGGCTGCCGCGCCCGGCAA  
GGTGGGCGGATTTCCACACGGCAGCGGCGCCCGCAAGGTGGGCGGATTCTCACGCGGCAGCGGCGCCCGCAAGATGG  
GCGGATTTCCACACGGCAGCGGCGCCCGCAAGGTGGGCGGATTCTCACGCGGCAGCGGCGCCCGCAAGATGGGCGGA  
TTTCCACACGGCAGCGGCGCCCGCAAGGTGGGCGGATTTCCACACGGCAGCCTCGCCCGCAAGGTGGGCGGATTTCCA  
CACGGCAGCCTCGCCCGCAAGGTGGGCGGATTCCACGCGGCAGCCTCGCCCGCAAGGTGGGCGGATTCCACACGGC  
ACCGGCGTGCGGCAAGGTGGGCGGATTCCACACGGCACCGGCGCGGCAAGGTGGGCGGATTCCACACGGCACCGGC  
GCCCGCAAGGTGGGCGGATTCCACACGGCAGCCGCGCCCGCAAGGTGGGCGGATTCCACGCGGCAGCCTCGCCCG  
CAAGGTGGGCGGATTCCACGCGGCAGCCTCGCCCGCAAGGTGGGCGGATTCCACACGGCAGCGGCGCCCGCAAGGT  
GGGCGGATTTCCACACGGCAGCGGCGGGGCCAGTGGGATTGAGGAGAATAGGTGTTTACGAATGCCCTGACAGGCGTA  
AAAAAACCCTTGGCGGCGGCTCATAAAGCAGAAAACCCGCTCAAGGCGGGTTATCTGCTCTGTAGCCTGTGATGCTTCG  
GGCATCCGGCATAACAGCGAGGTGAAATCTTTTGGCATGTTAATTATACGTCTAACGCGGCATATGATCAAACCTGTATTA  
AATAAGCCACTGTACCGTTTATAATGCTCTCAGATCAAAGAGGTAAAGCCGTTTAGCCGCCTGTGTGATGAGCCAGTTCAGA  
CTTTCAAATCGAATTTGGTACTAAACAGGACCCGAACCGTGGGCAAGCACACGGCAACGGTATAGCCCTCTCCGGTTTTG  
CACCCGGAAGCCTGGGCGGCAGCGTGGTAAATCTTTTGGTTAAGTGAATGGCATAACCGGATGGGCGGATCAAGAG  
GAAAGGGGATTGCCTAGTAACCTACGCGCCACAGAGATGGAGGTGCGGGGAATGATTGAGCTGATTATCGCTATTCTGACCT  
TAATTGCGGCTGTATTGCAGTTGATCAACTGGTTCCTTTAATGGTGCCGGAGTCTGTGAAGGTGAAAGCCTGAACGGGCAA  
ACTGAAAGGTTTATAGCCGTCCTTCGGGGCGGCTTCTTTTCGGCAAAATTAGGGTTTTACCGAATAATGCAGAGTTTTAAGGT  
GAGAATTTGCAGACTTGGCGTTTTACCGAACATAGATACTCCCTAGGCTGATAGGTGCATTAGTTATCACCTACCTGAACATAT  
TGAAAAGATGTCAGTCTCCAGTACTTGTGTACTATCAACTGACAAGACTCTTACACGCAACGCAGGGGGATGGAGTTTTAT  
GCTTAGAAAAATAATCAGGGGTAGCGGATTAAGTCAAGTCAAGAAAAACTGATAGAGTTCGCTGATGATGCTTTGGTCTTTG  
GTCTTATCCTAATGTTTATAGCGATGAGGGTACTCTAAAATAAAATTGGGAAAGAAGTTAGTGACTTATTAGTTATTTTTGAT  
AAAGATATAATAATTTTTCCGATAAAGCTATTACATACAATAAAACAAAGATCCTAAGGTTGCATGGCAGAGATGGTTAAAA  
AATCAGTCATACAGTCTTGACACAGTTATTTGGCGCAGAGAAGTTTATAAAGATCATCCCGAAAGACTTTTTGTTGACAAA  
GAATGCTCAGTTAACCTCCCATTAATAAGATAATTCTTTAATTTTCATTTGGTGGCCGTCATAATAATTTTACAGATCCGCG  
ATCCTTATGACAAAATAGAAAAGGAGCTCTGCTACTTTAGTTAACATATTTCTTTAAACGCCATCAATGTCTAGAAAATCC  
ATTTTGTGTCGGAGACGTTTATCCTGATAAGACTTTTGTCCATATACTTGATGAGACTGCCCTAAACTACTGTAAACCGAGTTA  
AACACAGCAACTGATTTCAATTGGCTACCTTAACGAAAAAGAGAGGGTTGTAAGAAAAAGAACATTATTGGTCAGCGCTGGGG  
AAGAAGAGACTCTGCTGCTTACATTATGGGTGATAAAACCATAATATCAAAGAAATTATTGAAACGATCAAGGGATGACCA

TACCGGAAGGTGAATGGAAAACTATAAAACCACTTTCAATTATCAATATCAGCTCTCAATGAAAAAGGGTAGCGTTTTCTGG  
GATAACCTAATCCACAACCTTCTCGACAAGTATATTGTCAGCTAACGTTGGTTTTTTTTAGTGAAATTGAATTTTCTACACATGAAT  
GAGGTGTTAGAGAATTAGCCAAAGAAAGTAGGCAATCTAAATATTACCTTTCAAAGAACTTTAAAGAGAAATTAATAAACT  
CAGCCTCATCTAAGAACGTCAAGAATGGTCAATCGATGAGCCTGGAAAGTTTTACTTATTCTTTTTTTTCTAACGATA  
GCAAGTTGAGTTACTCTGATTACAGAATTCAACGTATATCTTATATAAATGCTTATGCTGAGGTTGCCTTTAATAAATACAGACAT  
ATTAATAAATTAATTACTATTGCAACAGAGCCGCAAAATACAGAAGGAAAATCTGAAGACCTAATATATAAGCATATCCCAGAG  
AAATTTACAAAAAGCAAATGAAAAAGCCAAAAGATTATCAAGAGAATACAAAATACTAAGTGATTTTTTACCTACTAAAACGA  
CAAAGAGCGATAACTTTAAATCAGTTATATCAAAGGTGAAAAAATAGGGCGGAATACACCTTGTCATGTGGCTCCGGTGTT  
AAATTTAAAAAGTGCCATGGTGCGAATAATTAGCATTATTGTATGTATAACGGTAATGGCGCGGCAGAGGAACCGGCGCGTTC  
TGCCCTAGTGTTGGCCTGCGGGTTCCCCGCACCCGCTGTATGTAGTATCGGCAGCATCTGAGAAAACCACTACATGTAGCTAT  
CAGCGCCACAACGGCGCGGGGACGAGTGCGGTTTCGGAAAAATTGGGGTTTTACCGAATCCGGCAAAAGATTGCTTCCTATA  
ACGTCCGCTTCTGGCACACAGCAGCCGTTAAGATGTAAGGCTGCACGCCAACTAAATCTAATGGGACAGATTTAGTTGGTGAT  
GGTCAAGTAATCTGCAAACGGTCAACCAAGTAAAATGCAAATGGGTAGTCAAGTCCGATGCAATTACGCACCCGGCAAGGTG  
GCCGATTCCCACACCACAGCAGCGCCCGCAAGGTGGGCGGATTCCACACGGCAGCGGCGCCCGCAAGGTGGGCCTAT  
TCCCACACGGCAGCGGCGCCCGCAAGGAGGGCCGATTCCCACACAGCACCGGCGCGCGGCAAGGTGGGCCGAGTCCCA  
CACCGACAGCAGCGCCCGCAAGGTGGGCGGATCTCCACACAGCACCGGCGCCCGCAAGGTGGGCCGATTCCCACACGG  
CAGCGGCGCCCGCAAGGTGGGCCGATTCCCACACGGCAGCGGCGCCCGCAAGATCGGCGGATTTCACACAGCACCGG  
CGCCCGCAAGGTGGGCCGATTCCCACACGGCAGCGGCGCCCGCAAGGTGGGCGGATTCCCACACGGCAGCGGCGCC  
GGCAAGATGGGCGGATTCCCACACGGCAGCGGCGCCCGCAAGATGGGCGGATTTCACACGGCAGCGGCGCCCGCAA  
GATGGGCGGATTCCCACACGGCAGCGGCGCCCGCAAGATGGGCGGATTTCACACGGCAGCGGCGCCCGCAAGGTGG  
GCCGATTCCCACACGACAGCGGCGCCCGCAAGGTGGGCCGATTCCCACACGACAGCGGCGCCCGCAAGATGGGCGGAT  
TCCATATCGACATGTATGTAGCTTGTGTTATCCGTGGATTGTGCAGCTCAGCGGGTTCGCTTGTCTGTATGGCGTAGTGTCCCC  
GTAACCGGCCGCGTGCGGCCGCTAACCGCGCAGTACGGCGCCCGCACCCGAAGGCGGGCCCGCTTCCCGCGCGCAGGCGC  
GCGGCGCCCACTGCGCACCCCGTGGGGGACGTGCGGCAGCTGTGTGGCGGTGAGCGGGATTAGGGCTTTGCAGGGAGG  
GGCTGGGTTCGGGCGATACGTTTCAAGCATTGCGGTTTCCGGCGATTTCGGGCCGTTTAACTCCGGCGTGGTTCGCCTT  
CCATGCCCTGACGGCATAAGAAAATAAAACCGCCATGCTGCGGTCATTGATTTTTGTGGTGTAGCGATAAATAGTCATGCGA  
GAAACGTTGAAGCGCTTAGCAACTGCACCAACTGTCATTTCAAGGATCAGCAAGTAAGATTCTAATTTGTTAACATCTTCTTCA  
GAAAGTGACGGTTTTCTCCCTCCCACCGGCCCTTGCAGCTGCAAGGCCTGAGCGCGTCTTCTACAGATTGCGGTC  
GCGTTCAAAGCTAGAGAATATCGCCATCAGATGAGTATAGATTTCCCGATAACTGGCGCATTGTGTCTATTCTGTCTTGATG  
GCATGCAAGTTATTCCGCGTTTTCTTCAAGTCTGTCGAGTAAAGTAATGACTTGACCGAATGAACCACCGAGCCGATCTAGTGCC  
CAAATACTAGGGTATCTCCCTCGCGCAATGCTTTCAGGCAGTTCTCCAGTTCAGCGCACCTTTTTTGTGCGGCTTTGGGCC  
GCTACGTGAGGTCTGATCTGATAGATTTGCTCACATCCAGCTTTTGTAGTTCGTCAACCTGGTGCGCCACATCCTGAAGATG  
CGTAGATTTACGTGCATAGCCGATTTTCAATCTTTTCTCGCTAATTAGTTATGGGGTTATTGTTATGTTGATACAGTAACGAGTTT  
TGTTACATGAGGGGAGTCATTTTTCGGGAGAAGTCAGGACTTTTCAAGACTGTCACAAAACCATCGTTTTTGTGATACATTAAT  
TTAACCAATAGGTTGCAGATCAAATCGTCTGTAACAGCCTTTCTGGCTGTTTGTATATAATCATGAAAAAATGGTGAGTAGAGT  
TTCAGGGTAACAGGGGATGCTTATGTCGGTTTTCCACAACCTGGCTACTTGAGATCGCATGTGAGAATTACTTCGTCTACATCAA  
ACGCCTTTCCGCCAACGATACCGGCGCAACAGGTGGTCACCAGGTAGGGCTTTATATCCCTTCAGGTATCGTTGAAAACTCT  
TTCCGTCTATCAACCATACCCGTGAACCTGAACCTTCGGTTTTTCTACCGCACATGTGTCATCGCATGATTGCCCTGACAGCG  
AAGCCCGGGCAATTTATTATAACAGCCGTCATTTTGGTAAAACCCGGAATGAAAAAGGATTACCCGCTGGGGTAGAGGCAG  
CCCCTTCAAGATCCTGAAAATACAGGGGCTCTGACGCTCCTGGCTTTCAAGCTTGATGAGCAAGGGGGGGACTGTAAGGA  
AGTAAATATTTGGGTATGCGCCAGCACTGATGAAGAGGACGTCATTGAGACCGCTATTGGTGAAGTTATACCCGGAGCGCTTA  
TATCCGGCCCCGAGGACAGATTCTAGGCGGACTATCTCTACAGCAAGCGCCAGTAAATCATAAATATATTCTACCTGAAGACT  
GGCACCTGCGCTTTCCGTGCGGAAGTGAATTTTCAAGTATGCAGCCAGCCATTATGTGAAAAATCCCTTGATCCGGATGAG  
CAACTTCTGACCGCCGGCGCGTGGAGTACGACATATTTCTATTGGTTGAGGAACTGCATGTTCTGGATATCATCCGGAAAGG  
ATTTGGCTCTGTGGATGAATTTATTGGGCACTGTTGCAAATAGTCGGTGGTGATAAACTTATCATCCCTTTTGTGATGGAGC  
TGACATGAACCCATTCAAAGGCCGGCATTTCAGCGTGACATCATTCTGTGGGCCGTACGCTGGTACTGCAAATACGGCATC

AGTTACCGTGAGCTGCAGGAGATGCTGGCTGAACGCGGAGTGAATGTCGATCACTCCACGATTTACCGCTGGGTTTCAGCGTT  
ATGCGCCTGAAATGGAAAAACGGCTGCGCTGGTACTGGCGTAACCCTTCCGATCTTTGCCCGTGGCACATGGATGAAACCTA  
CGTGAAGGTCAATGGCCGCTGGGCGTATCTGTACCGGGCCGTCGACAGCCGGGGCCGACTGTGATTTTTATCTCTCCTCCC  
GTCGTAACAGCAAAGCTGCATACCGGTTTCTGGGTAAAATCCTCAACAACGTGAAGAAGTGGCAGATCCCGCGATTCATCAA  
CACGGATAAAGCGCCCGCCTATGGTCGCGCCTTGGCTCTGCTCAAACGCGAAGGCCGGTGCCCGTCTGACGTTGAACACCGA  
CAGATTAAGTACCGGAACAACGTGATTGAATGCGATCATGGCAAACGAAACGGATAATCGGCGCCACGCTGGGATTTAAATC  
CATGAAGACGGCTTACGCCACCATCAAAGGTATTGAGGTGATGCGTGCCTACGCAAAGGCCAGGCCTCAGCATTTTATTATG  
GTGATCCCCTGGGCGAAATGCGCCTGGTAAGCAGAGTTTTTGAATGTAAGGCCTTTGAATAAGACAAAAGGCTGCCTCATC  
GCTAACTTTGCAACAGTGCCGTACCGACGGTGATATGGGGCAAATGGTGGTCACCATCCTGTGCGCTGTGGCACAGGCTGAA  
CGCCGGAGGATCCTAGAACGCACGAATGAGGGCCGACAGGAAGCAAAGCTGAAAGGAATCAAATTTGGCCGACGGCGTAC  
CGTGGACAGGAACGTGCTGCTGACGCTTCATCAGAAGGGCACTGGTGCAACGGAAATTGCTCATCAGCTCAGTATTGCCCGC  
TCCACGTTTTATAAAATTCTTGAAGACGAAAGGGCCTCGTGATACGCTATTTTTATAGGTTAATGTCATGATAATAATGGTTTC  
TTAGACGTCAGGTGGCACTTTTCGGGGAAATGTGCGCGGAACCCCTATTTGTTATTTTTCTAAATACATTCAAATATGTATCCG  
CTCATGAGACAATAACCCTGGTAAATGCTTCAATAATATTGAAAAAGGAAGAGTATGAGTATTCAACATTTTCGTGTCGCCCTTA  
TCCCTTTTTTGCGGCATTTCCTTCTGTTTTTGTCTACCCAGAAACGCTGGTGAAGTAAAGATGCTGAAGATCAGTTG  
GGTGCACGAGTGGGTTACATCGAACTGGATCTCAACAGCGGTAAGATCCTTGAGAGTTTTCGCCCCGAAGAACGTTTTTCAA  
TGATGAGCACTTTTAAAGTTCTGCTATGTGGTGCAGTATTATCCCGTGTGACGCCGGGCAAGAGCAACTCGGTGCGCCGATA  
CACTATTCTCAGAATGACTTGGTTGAGTACTACCAGTCACAGAAAAGCATTTACGGATGGCATGACAGTAAGAGAATTATG  
CAGTGTGCCATAACCATGAGTGATAACACTGCTGCCAACTTACTTCTGACAACGATCGGAGGACCGAAGGAGCTAACCCTT  
TTTTGCACAACATGGGGATCATGTAACCTGCGCTTGATCGTTGGGAACCGGAGCTGAATGAAGCCATAACCAAACGACGAGCGT  
GACACCACGATGCCTGCAGCAATGGCAACAACGTTGCGCAAACCTATTAACCTGGCGAACTACTTACTCTAGCTTCCCGGCAACA  
ATTAATAGACTGGATGGAGGCGGATAAAGTTGCAGGACCACTTCTGCGCTCGGCCCTCCGGCTGGCTGGTTTATTGCTGATA  
AATCTGGAGCCGGTGAGCGTGGGTCTCGCGTATCATTGCAGCACTGGGGCCAGATGGTAAGCCCTCCCGTATCGTAGTTATC  
TACACGACGGGGAGTCAGGCAACTATGGATGAACGAAATAGACAGATCGCTGAGATAGGTGCCTCACTGATTAAGCATTGGT  
AACTGTCAGACCAAGTTTACTCATATATACTTTAGATTGATTTAAACTTCATTTTTAATTTAAAGGATCTAGGTGAAGATCCTT  
TTTGATAATCTCATGACCAAATCCCTAACGTGAGTTTTCGTTCCACTGAGCGTCAGACCCCGTGTGACACCGGCGTACCCT  
CGGTGCTATCTTCGCGCCCAATAGTCGGGGCTTGCCAGGACTTCTGAGGCCGTCCGTAACCTCCACCTTCAAACAAGGAA  
TATTGTTGATGTCACTGTATCGCCGTCTAGTTCTGCTGTCTTGTCTCTCATGGCCGCTGGCTGGCTTTTCTGCCACCGCGCTGAC  
CAACCTCGTCGCGGAACCATTGCTAAACTCGAACAGGACTTTGGCGGCTCCATCGGTGTGTACGCGATGGATAACGGCTCA  
GGCGCAACTGTAAGTTACCGCGCTGAGGAGCGCTTCCCACTGTGCAGCTCATTCAAGGGCTTTCTTGCTGCCGCTGTGCTGG  
CTCGCAGCCAGCAGCAGGCCGCTTGTGACACACCCATCCGTTACGGCAAAAATGCGCTGGTTCCGTGGTCAACCATCTC  
GGAAAAATATCTGACAACAGGCATGACGGTGGCGGAGCTGTCCGCGGCCGCGTGAATAACAGTATAACGCCGCCGCA  
TTTGTGCTGAAGGAGTTGGGCGGCCGCGGGCTGACGGCCTTCATGCGCTCTATCGGCGATAACACGTTCCGTCTGGAC  
CGCTGGGAGCTGGAGCTGAACTCCGCCATCCGCGGGCGATGCGCGGATACTCATCGCCGCGCGCCGTGACGGAAAGCTT  
ACAAAACTGACACTGGGCTCTGCACTGGCTGCGCCGAGCGGCAGGAGTTTTGTTGATTGGCTAAAGGGAAACACGACCGG  
CAACCACCGCATCCGCGCGGCGGTGCCGCGAGACTGGGCAGTCGGAGACAAAACCGGAACCTGCGGAGTGTATGGCACGG  
CAAATGACTATGCCGTCTGCTGGCCACTGGGCGCGCACCTATTGTGTTGGCCGTCTACACCCGGGCGCCTAACAAGGATGAC  
AAGCACAGCGAGGCCGTCATCGCCGCTGCGGCTAGACTCGCGCTCGAGGGATTGGGCGTCAACGGGCAGTAAGGCTCTGA  
AATCATCTATTGGCCCACCACCGCCCTTGCGGGCGGCATGGATTACCAACCACTGTCACATTTAGGCTAGGAGTCTGCGC  
GGCAGAGCCGTGTGACCGTTTTTCTGTAGAGCACTGACGATGGCGGCGGCGCTCTCTGCAATTGGCAAGGCGTCGGCGCA  
AGGATACCAATCTTGCGGCGCGCGGCTGTTATGACGACTGGGGTGCATTTGAGCCGCCCATTTAACCTTCGCCCTCACAGA  
TACGCCATTCGCCTCAGATTTAGCGCCATGCAGACGAGCTTCCACTCGGCTTGACCTTGCCAGGCCCTCATGCTGAACTG  
ACGCAATCCCATCACCGCCTTGATCCAACGATTCCGAGCCTCCACGATCGACTTGCGCCGGCGGTAAGCTGCATCGCCTTGCT  
CCGTTTTCAATTTCCGCCAATCGCCGCCGATGCGGATGGGTCTTGGCATTGACCTTGGCATCTTACGTCCCTCGCGGCCG  
AGGGCAACGATGACATCGCCGTGGTGATCGGCGACCTTTGCCAGAACAGCCTCACTACGGAATCCCGCATCCGCCAGCGTCT  
GGGCCGGCATTCTCCGGTGTGGCCTGAACTGCTGCCAGCATGCCAGCAGCGCCTGACTGTCCGCGGCGCAGTTGGTCA

ACTCCGCCGCCACGATGATCTGGTGCTCGGCATCGACCGCTGTGTACCCGTTGTAGCTCTGCTCGGAGCCACCACCGGCGTGT  
TTCATGATCCGGCTGTCCGGATCGGTGAAGCTTTCCTGATCACGGTCATCCGGCACACCAAACCTCGCGTTTGTACGAGCCACC  
GCCCTTGTCCGAGCCATCCGGATGGCGAGGCCGGCGGCCATCGTCTTCGCTGCGCCCCGGGCTGGTCCGCTTACGCTGG  
CGCGCTTCCAGGGTTCGGTTCGGCTGAGGGCGAAATGACACCCTAAGCGTTAGCTCTGTGTGCTTGCACGATGTCAGCGAC  
GGTATTCTTGCTGATACCGAGCTCGCGTGCGATCCAGCGATAGCTGCGTCCCTCGGCCCTCATCGCAACCACCTTAGGCAAAA  
GTCGGTCTGATTTTGGTCGCACTCCGGCCTGACGACCAAGCCTCTTACCACGTGCCTTCGCAACAGCAAGGCCTGACTTGAC  
CCGCTCGCTGATGAGATCCCGCTCAAACCTCCGCAATGCCGAAAGAAACGTCGCCAGCATTTCGTCCATACGGCGACGAAAGA  
TCGAACGCCATTCCATTCATGGCTATCACGAAACCTTCCAGTTCTCCAGTTCACGTAGCGTATTGAGCAGATCGAGCGTCA  
GCGCCCCACCGGAAAGCTCAGTGACCAGGATTGCATCAATTTGTCTGGACTGGGCAAGCGCCAGGACTTTCTTTTCGCTCG  
GCCCCGTCGAGTTTAGTTCCTGAACCTGTTTCTTAAATATCCCACCACGTCGTAGCCGGCACGGCCGGCGAAGGCTCGCA  
GATCAAATTCCTGGCGTTCACAAGACTGATCCGCTGTTGAAACCCGGCAGTAAATGGCGGCACGATGTCCCAATTGAACCTC  
CTGGATTTTGTATCGGAACGCCCTGATTTATATGGGCTGGCTGTTGTCCAAAACAGACTATACTTCAAAGGGACGAATTTGT  
ATGTCACGACGCCATATTTTACCGAACGGCAGCGAGCAGCGCTGTTTCGATCTGCCACGGACGAACTGTGCTACTGAAGT  
TCTACACGCTGGGCGATGATGACCTGGAAAACATTAGGCAGCGCCGACAGCCGAAAACAGGATTGGCTTTGCCCTGCAAC  
TTTGTGCCTTACGATATCCGGGCCGTGCACTGGCTCCTGGTGAGATGATCCCGCGTGAAGTCCTTTCCTTCGTGCGTGCTCAG  
CTTGAGTTCGGGCTGATGCGCTTCTCACTTATGCCACACGGCGCAAACCCGTCAGCAGCACATGGACACGCTGCGCGAAA  
TTTACGGCTACAAGACCTTACGGGCCGTGGTGCCCGTGATCTGCGGGAGTGACTTTTCGGCCAGGCCGAAGATGCCAGAT  
CAAACGAGGATCTTGCTCATCGTTTTATTGTGCGGTGTCGGGAAACTTCCACCATTCTGCCCGCAGTATCGACAATCGAGCGC  
TTGTGCGCGGATGCTCTGGTCGCCGCTGAGCGGCGGATTGAAACGCGGATTGTGGAAAATTTAACAGCGGATGTTTCGCGATC  
ACCTGGACAAACTTCTGAGTGAAATGCTCGCCGGCAATATCAGTCGTTTCATCTGGCTTCGCAACTTCGAGGTTGGTAACAAC  
TCGGCTGCTGCTAACCCTTTGCTCGACAGGCTCGAATTTCTGCGTACCCTGAATATCAATCATAGTGCTTTGGCCAGCATACT  
GCCATCGCATTGCCCGGCTGCGTCGGCAGGGTGAACGCTACTTACCAGCGGTTTTCGCTGACATCACTTCGGACCGCCGCT  
GGGCGATCCTTGCCGCTGTGTTGTGGAGTGGGAAGCGGCGATTGCTGATGCCATAGTCGAAACCCATGACAGGATCGTAGG  
AAAAACCTGGCGGGAAGCGAAGCGCCAGCATGACGAAACAATTTCCGGCTCTAAAGCCACACTCACGGATACGATCCGTAC  
CTTACCAGCGCTGGGAGCTTCGTTGCTTGAGGCCCGCAGTGACGGAACCCCGCTGGAGATGGCTGTGCGCCAGTTCGGTTGC  
ATGGGACCGGCTCGCTCAACTGGTAGCGACAGGGACTCAACTCAGCAACACGCTAGCCGATGAGCCTCTTGCAATGTCGGG  
CAGGGATACCATCGCTTTCGTCGTTATGCGCCCCGATGTTGCGCTGTCTGAAGCTCGAAGCCGCGCCGTCGCCGACCATT  
GGTAGCAGCAGCTTTGTCGATCGGAGAGATGAAAGGTGTTGCATCGCCAGAAAGGCGTTTCTGCGGCCAGCTCCAAATG  
GAACCGTCATTTACGAGCTCAGGAAAAAGGAGATACCCGCTTTTGGGAAGTGGCGGTACTCTTTCACCTCCGGGATGCTTTT  
CGTTCCGGAGATGTCTGGCTCGCTCATTGCGGCCGCTATGGTGACCTCAAGCAGGTAAGTGGTCCGATGATCGCGGCCAGG  
AAAATGCAAAACTGGCCGTGCCTTCCAACCCACAGGATTGGCTGGCAGACAGAAAGGCGGACTCACGATCGCTCTTAAGC  
GGCTGGCCCCGGGCTGCCGTAACGGCACTATTCCGCACGGTAGCATAGAAGATGGAACGTTGCGGATCGACAGGTTGACAG  
CAGACGTGCCGGATGGTGCCGAGGCACTCATACTGGATCTGTATCGCCGAATGCCGTCCGTTTCGGATTACCGACATGCTGCTT  
GAAGTTGATGCAGCCCTTGGTTTACAGATGCGTTTACCCATCTGAGAACCGGGGCTCCATGTGCGGACCGGATCGGTCTGC  
TCAACGTCCTGCTCGCTGAAGGGCTCAATCTGGCCTGCGTAAGATGGCGGAAGCTACAAACACGCATGATTACTGGCAGCT  
CTCACGCTTGCCCGCTGGCATGTTGAAAGCGAAGCCATGAACCAGGCATTGGCAATTGTGGTGGCCGCGCAGGGTAAACT  
GCCGATGTCACGCGTCTGGGGGATGGGCACGTCAGCATCGAGCGATGGTCAGTTTTTCCCGACAGCGCGGCATGGCGAAGC  
CATGAACATGGTCAATGCCAAATATGTTTCTGTTCCCGGCCCTCAAAGCGTATACTCACGTAAGCGACCAGTTCGCGCCATTGCG  
TTGTCAGTCGATCCCGGCGACCGTGAGCGAGGCACCGTATATTCTCGATGGACTACTGATGAACGAGGTCGGTTCGCCATGTT  
GCCAACAGTATGCCGATACAGCAGGATTACCGACCATTTGTTTCGGAGCCAGTAGCCTGCTCGGCTACAATCTCGTTCTGCGA  
ATCAGGGATCTGCCATCGAAGCGGTTGTACGTATTTAATCCCGATACGACCCCCAGGGAGTTACGCAAGTTGGTAGGTGGAA  
AAGCCCCGGGAGGATCTTATCGTTGCGAACTGGCCTGATATTTCCGTTGTGCCGCGACGATGACCGCTGGCAAAATCAGGCC  
CAGCCAACTCCTGCGCAAGCTCGCTTCTTACCACGACAAAACAACCTTGCAGTTGCGCTTCGTGAAGTTGGTTCGTATTGAAC  
GGACCTTTTTCATTATTGAGTGGATCCTGGATACGGACATGCAGCGGCGTGCTCAGATCGGTCTTAACAAGGGAGAGGCCCA  
CCATGCGCTCAAAAATGCGCTCCGTATCGGGAGGCAGGGGAAATTCGCGATCGCACGACAGAGGGGCGAGCACTACCGAAT  
CGCTGGGCTCAATTTATTGACTGCGGTGATCAATTTACTGGAATACCGTCCATCTTGGTCATGCCGTACGGAGCGGCGGAACG

AAGGGTTGGATGTTCCCCCTGAATTTCTTCCCCACATATCCCATTGGGCTGGGCGCACATTCTACTGACTGGCGAATATCTTT  
GGCCCAAGGAACCGAAAGCTTAGGGTGTCAATTCGCCCTCAGCCGGAACCGACCCCTTCCAGGCGCGCCTTTGCCGCCTGG  
ATCGCCTCCAGGCGCTTCTCGCGGCGAGAAATCTCGGCAGGAATGTCCAGCTCCGGCTCGTTACGCTCCTGGTCGTCGGTAG  
CCTTGGCGGATCAAGCAGCGCCTTGATCTCGCAATGCAATTCGTCTCGGCCGGCTTCATGCGCTTATAGCTCATCGCCTGT  
GGCGGCTGGCGTTGGCTTTTACCTTGGTGCCGTCGACCGCGATCGTGCCAAGCTTACCAGCCCACATTCGCGCGCCAGTTG  
CACCACCTGAACGAACAAATTCTCAAGCTCGGTCAGGTGTAGGGCACGGAAGTCACTCAGCGTGCAGGTGGGCCGGGAAGTT  
TCCAGCGGCCAGCACACGCAACGCGACATCCTCGTACAGCTTCTGGTAGTTTGCGCGAAGAGAAGACGCCGCTCGCGTA  
ACCATAGATCAGCACTTTGACCATCATCGCCGGATGAAACGGCTGATTGCCCGACCACCGCCGGCATAACCGGGCGTGGAAT  
GCGCTCAAGTCCAGCGTATCGACAGTCTCGCTGATGAAGTAGGCAAGATGCCCTTCAGGTAGCCACTCTCCAGAGAAGGGG  
GCAGCAGATAGGATTGGTCGGGTCGTAAGGAAGGTAAGTGGCAGCCATCCCCGTATCGTCTCGATCTTCCGCCGATTTGG  
CTTCTGCCGCGCAGGCTCCTAGGCCACCGTAGCTAAACATACGAGAAAAACCGCTTCTTGAGCGCTCTCTGAGACCACCTGC  
CGACAACGCGAGAAACGTTGCGGAAAAATCGGCGTTTCCGGCGTACGCCACCCGACCTGGACGAACCTATTGCGGACCTGGA  
ACTGGAGTAGCGGAATTCCCCGGGGTTTACGCGTCGCGCCACAGCGCCTCAGATAGATGCGGTAGCCTTTGGCGGGTCGTC  
ATGCCGCGGACCACCCCCCAAAAAATTCCACAATGCGGAATGGCGGAATTTTCTGGGGTTCCCGCTTACCCCCCTTCAGGC  
GAGTAGCCAACCTGAACGGATGGTTCCACCGCAAAGGCGGGCAGGGCGGCTGTCTGTAATGCTGCGGCCAGAAGCCAGGT  
TGCTAAGTTTTTTCATTACAGGCTCCCGTTCACACACTGCATTTTATATTACAGGGTCAAATAAATTTCTTTGATTTTCCGCTTTTC  
CATATGCACCACAACGTCAATGGTGGAGTAGAGCATTGCGATAATATCGCTCATATCGAGCATAACGGCCGATAGGGGTCGCCTT  
GATAAGCAGCCCAATACGGTTAAAGGCATCGCGCGCAGAGTTAGCGTGCGTTGACATAACACCGCCTGGATGGCCGGTATTA  
AGTGCTTTAAGATAATCCCACGCAGCATCATCCCTAAGCTCAGTCATGATGATACGGCCCCGTGTGACAGGCATACAGGCTCGC  
AGGGCATCAGTGGCGCTGACGCGGCCGATCTTCTGCATCGCCGTACATCATATAAACGGCTTCTACAACGTGATCGACCGT  
GACTTCGTGAACGTCTCTAAAATAATTACACGCTCGTCTTTATGTAGCGATTTTAAACAGCGCGCGCGTGAGTACCGTTTTCCC  
CGACCCGTTTTACCCGAGATCACGATAGTGCGTTTTCTTCAACGGCGGTTTGCAGGAATGCGGGCCATTTTTCGCTGCTGT  
GCAGCTCTTTAAGGAAAAAATCATCATCCGTTAGGCTTTGCTTGTGCTGCCGTAATCTTCCGGCAGTCACTGAAAATCCCCTCGC  
GGGTCAGCTGCTCCAGATTTTTATCGGCCGCAAATCCTTACGAAACGCTACGGCCGTTGTACCGTCAATCACCCGAGGGGG  
CAGACAGATAACGCCCTGATCCCGCCAGGCAGGATCACGTCATTAATGGCCTGCATGGTCAGCTTGTGCTGCTCACCAACG  
ATTTAGCAAGGTTCTAATAAAATCTGCCGTAATTGCCGCTTCTGCACAACCCTGCGGCCGCTGAACGTATCACAGATAACTT  
CCTGAAAGCAGTTAATGCGAATTTCAAAAACAGTAGGATCTTCTAAATACTCGCGCAGTGGGCCAAGTTGATAGAAAGCTGC  
ATCAGTCATGATTACTCTGAAGAAAAGCGGGCGCTAAGCGCCCACTTTTTTAGTTGTCTGCGAGCGTATAAACGCCGCTGAA  
ATCGAGGTCGCGGGCAACAAAATGCTCACCGCATCACCTGCTGATCGTAGAGGGTAGGGGGGATAGACATGTAAGAGCG  
GAGTGCTTCAGACGCCAGCTGCTCACCGCTGTTTTCTGTGCTGTTGTAATGTTACTCTGCGTCTGGTTAACCAGCGC  
CGTTAAGGTGTCAGAGAACAACGAAATCATGATCGCACACGACGCTCCCACATATGGGTATCCACCTGGCCCGGAATCC  
CCGCGCTGCCGAGTGAGTTGTTCCGGCACTGTCAATATTAACGATTGTCCCGTCTGGTCAATGCGGATACGCTCCCAGAGA  
ACAAACACGCGCGCCTGGCCGTCTTTGATACCACCGTAATCTGCCCGTCAACCCATGAGCCTTTATCAATCAGCCTAACGAGT  
CCATCAGCTGAGTAAACGTCTGTGAAACCCGGCAGGAAACCTGACCCGGAACAGTGGTATCCAGCTCGGTGCCGGTACCAC  
AGGGGATCATTTTGCCTTTTCGGAACAGTCAGGCTGGGATTAGCCATGACTCCAGCGCGGCTAGCCTTCAGCCTTGCCAGGAGT  
CAGGTTTTTAGCGAGTGCTGAACTACCTTCGCTTGTTCGTTGCTTGGGGCTGCACTCCGGGACTATTGCTTGTAGCCGCT  
GATTAGTCTGGGCCAGCTCGCCGCCAGACGACGCTGCATAGCCAGTTCTTCAGGCGAAGGTTCTTTACGCTTATTAGAGGTA  
CGCGCGGCGGTATTGCTGCTGCCCGCATCTGCATCTGCCTGTGCGGCAGCCTGCACAGCACGGGCATCAGTGGCGCTATTCT  
GCGCAGTTGCAGGTTTATTAACATCAGGATCGCTGTTAAAGCTGTAGTTTGGCAGTGTATTGGCCTGTTGCGCTTTACCACCGT  
CTTTATCAGCTTCAGCTTTAGCCGGGGTGCGAATTTTACCCATGACCGTAATCCCGATGAATACCAAAGCAAGCAGCGCCATCA  
GTATGACAAAGGCTTTTACATACCAGGAGCCGAACGGCGGTTACTGCCTTTAAATCCGCCACGCTCGCTTTTGAATTCACCGTCT  
CCGGTGTTTTTATCGAGTTCCTGATCTACATCGACACTTTTACGGGCCATCAGTTATCCTCCCAATTTGAACCCTGCGCACATC  
CGGGGAAGCCGTACCGGTTGCTACCGCACCGGCCGCCGCGGAAATTATTATTACGAACGCCAACGACTTTATCGCCCAGA  
CGAATACGCCACTCTTTAGCGACGGTTTCCACCTCGATGATGTTGCGGTTCTCACCCACAACATGAGAGTTAGGCAGCGTTTC  
TTTGCCACTGGCCGAAATCATGTAGACCTGCGGTAACCTCCGATTGGCCGGAACCTCAAACCGGGTAAAGCGGTAGTTATCCC  
AGACGTGAACCGGCTGGATGCTGCGCATTTCAGGCTGTTGCTCATTACGTACTGATAGTTCTTCGCCCCCGCAAAGCCGTC

TGCTTCAGCTTCTGCGTAATGCGTTTTTTATCAGCCGCGCTTTTGGCTTTTTCTGCTGCTCAAACGGATATTCATAGGTCAGCT  
GAAGAACGGCCTGGCGCACAGCCCACGGCGTTTCAATAAAGGATTTTGATACCGTACCGTCTGCATTTTTCTTCGTTTCTTCA  
CCGATGAAATGGAGGACGATGTTATAGGTGCGCTTATCGGTGACGATCACCAGGTTGGTATCACTCATGGCCTGTTTCGGCTT  
CACAAAAAATGGTTCATTTTTGTGCGCAAACGTCCAGCTTTCAGAATCGCCAAAAGCATGAGTGATATAGGTTTTCGTCAGGCG  
CGACAACAATGTGGGTAGCCACACCGGCGATAGCGTCAATTTTGACCACATTAACAGGGTTATAACAACGCTTTTAAATGCGA  
TAGTCATAAGGAGAATTGCGGCCAACCTCAAGCGCCATAACGTTAGTGGCCGCGCCTCCCAGGACTGACAAAACGACTGCTG  
AAAGAAGTAGTTTTTTCATGGGGCAGCCCTCAGTTAACTTCAGGGTTGACGCGATAACTCGTCACGCGGAAACCCAGCGGGT  
TGACATAACGCTGCTCAGCATTATCGCCAGCGATTATATTATACACCCATAATGGCAATCCAGCGCTGCGGGCTGATCATCAAC  
GGGATTGCTGCGCACGCGGGAACCGTAGTAAAGCGTATCGTTGCTACGCCGTGCGGTTTATCGAGGATCACAGAGTTAATC  
TTCACGCGGGTCGTTTCACTGTCGCCAGAACCTTATCAAGACCGTTGCGGCCCTTGAACCTGCTCTGGTAAGACTCTGCCAC  
GTTTCGGCGTGGACATTAAGCCAACGGCCGTATAGTCGACCTGAACTGAATAGAAGTCATAGCTCTCACGGTGAATGACATATT  
GTGTCAGCCAGAACTTATCAATTCGTCACCATAAGAGGTCTGGTCGCGGGTCAGCTTGACCTGCTGTACTTCGTGAGTGCC  
TCGTTGAGCGTTAGCAGATGTGCGGGGATTGGCTGGCTGACTTATGCACCACGTAACCAACTAAAGAGAGTGCAAAAACAG  
TTACCACCGCTGAACCGGTGGCAACCATCCAGGCGGTACGCCGGGACTTCAGCACTTCATCCATCAGATCAACTTCAAGCCCT  
TTACGGCTTTTCGTTGAACTCTTAAATGGCTTACGTGTAAGCCCTGTTTTTTTATTAGCTTTCATTTGCACCACCTTGCGTATCAA  
CCGGGATTGTTTTGTTTACTGGAACGGTGTGCTCCAGTCCGGCTCCGGTGGCGGTTTATGCCCGCTGGAACAGGCGCTAAT  
CAGAAGAACTCCCATAAGCAATAAGGGGTGCGTTCGGGCTGAGGGCGAAATGACACCCTAAGCTTTCGGTTCCTTGGGCCA  
AAGATATTCGCCAGTCAGTAGAATGTGCGCCCAGCCCAATGGGGATATGTGGGGAAGAAATTCAGGGGGAACATCCAACCCCT  
TCGTTCCGCCGCTCCGTGACGGCATGACCAAGATGGACGGTATTCCAGTAAATGATCACCGCAGTCAATAAATTGAGCCAGC  
GATTCGGTAGTGCTGCCCTCTGTCGTGCGATCGCAATTTCCCCTGCCTCCCATAACGAGCGCATTTTTGAGCGCATGGT  
GGGCTCTCCCTTGTTAAGACCGATCTGAGCACGCCGCTGCATGTCCGTATCCAGGATCCACTCAATAATGAAAAGGGTCCGT  
TCAATACGACCAACTTCACGAAGCGCAACTGCAAGGTTGTTTTGTCGTGGGTAAGAAGCGAGCTTGCGCAGGAGTTGGCTG  
GGCCTGATTTTGCAGCGTTCATCGTCGCGGCACAACGGAAAATATCAGGCCAGTTCGCAACGATAAGATCCTCCCGGGCTT  
TTCCACCTACCAACTTGCGTAACCTCCCTGGGGTTCGTATCGGGATTAAATACGTACAACCGCTTCGATGGCAGATCCCTGATTC  
GCAGAACGAGATTGTAGCCGAGCAGGCTACTGGCTCCGAACAATGGTCGGTGAATCCTGCTGTATCGGCATACTGTTTCGCG  
AACATGGCGACCGACCTCGTTCATCAGTAGTCCATCGAGAATATACGGTGCCTCGCTCACGGTCGCCGGGATCGACTGACAAG  
CGAATGGCGCGAACTGGTCGCTTACGTGAGTATACGCTTTGAGGCCGGGAACAGAACCATATTTGGCATTGACCATGTTTCATG  
GCTTCGCCATGCCGCGCTGTCGGGAAAAACTGACCATCGCTCGATGCTGACGTGCCCATCCCCAGACGCGTGACATCGGCA  
GTTTACCCTGCGCGGCCACCACAATTGCCAATGCCTGGTTCATGGCTTCGCTTTCAACATGCCAGCGGGCAAGGCGTGAGAG  
CTGCCAGTAATCATGCGTGTGTTGAGCTTCCGCCATTTACGCGAGGCCAGATTGAGCCCTTACGCGAGCAGGACGTTGAGCA  
GACCGATCCGGTTCGCGACATGGAGCCCCGGTTCCTCAGATGGGTAACGCATCTGTGAAACCAAGGGTGCATCAACTTCAAG  
CAGCATGTGCGTAATCCGAACGGACGGCATTCCGGCATAACAGATCCAGTATGAGTGCCTCGGCACCATCCGGCACGTCTGCTG  
TCAACCTGTGATCCGCAACGTTCCATCTTCTATGCTACCGTTCGGAATAGTGCCGTTACGGGCAGCCCGGGCCAGCCGCTTA  
AGAGCGATCGTGAGTCGCGCCTTTCTGTCTGCCAGCCAATCCTGTGGGTTGGAAGGCACGGCCAGTTTTGCATTTTCTGCG  
CCGCGATCATCGGCACCAGTACCTGCTTGAAGTACCATAGCGGCGCAATGAGCGAGCCAGACATCTCCGGAACGAAAAG  
CATCCCGGAGGTGAAAGAGTACCGCCAATTCCCAAAGACGGGTATCTCCTTTTTCTGAGCTCGTAAATGACGGTTCATTTG  
GAGCTGGGCCGAGGAAACGCCTTTCTGGCGATGCAACACCTTTTCTCTCCGATCGACAAAGCTGCTGCTACCAATGGTCC  
GGCGACCGGCGCGGCTTCGAGCTTACAGACAGCGCAACATGCGGGGCGCATAACGACGAAAGCGATGGTATCCCTGCCCGAC  
ATATGCAAGAGGCTCATCGGCTAGCGTGTGCTGAGTTGAGTCCCTGTCGCTACCAGTTGAGCGAGCCGGTCCCATGCAACC  
GAACTGGCGACAGCCATCTCCAGCGGGGTTCCGTCACTGCGGGCTCAAGCAACGAAGCTCCCAGCGCGGTGAAGGTACG  
GATCGTATCCGTGAGTGTGGCTTTAGAGCCGGAATTGTTTCGTCATGCTGGCGCTTCGCTTCCCGCCAGGTTTTTCTACGAT  
CCTGTATGGGTTTCGACTATGGCATCAGCAATCGCCGCTTCCCACTCCACAACACAGACGGCAAGGATCGCCAGCGGGCGG  
TCCGAAGTGATGTCACGCAAACCGTCGGTGAAGTAGCGTTACCCTGCCGACGACCGGGCAATGCGATGGGCAGGTATG  
CTGGCCAAAGCACTATGATTGATATTCAGGGTACGCAGAAATTCGAGCCTGTGAGCAAACGGTTAGCAGCAGCCGAGTTGT  
TACCAACCTCGAAGTTGCGAAGCCAGATGAAACGACTGATATTGCCGCGAGCATTTCCTCAGAAAGTTTGTCCAGGTGATC  
GCGAACATCCGCTGTTAAATTTTCCACAATCCGCGTTTTCAATCCGCCGCTCAGCGGCGACACAGATCCGCGCACAAGCGCT

CGATTGTCGATACTGCGGGCAGAATGGTGGAAAGTTTCCCGACACCGCACAATAAAACGATGAGCAAGATCCTCGTTTGATCT  
GGCATCTTCGGCCTGGCCGAAAGTCCACTCCCGCAGATCACGGGCACCACGGCCCGTGAAGGTCTTGTAGCCGTAAATTTTCG  
CGCAGCGTGTCCATGTGCTGCTGACGGGTTTGGCGCCGTGTGGCATAAGTGAGAAGCGCATCAGCCGGAACCTCAAAGCTGA  
GCACCGACGAAGGAAAGGACTTCACGCGGGATCATCTACCAGGAGCCAGTGCACGGCCCGGATATCGTAAGGCACAAAGT  
TGCAGGGCAAAGCCAATCCTGTTTTCCGGTCTGCGGCGCTGCCTAATGTTTTCCAGGTCATCATCGCCAGCGTGTAGAATT  
CAGTAGCGACAGTTCGTCCGTGGGCAGATCGAACAGCGCTGCTCGCTGCCGTTCCGGTGAAAATATGGCGTCGTGACATACAA  
ATTCGTCCCTTTTGAAGTATAGTCTGTTTTGGACAACAGCCAGCCATATAAATCAGGGCGTTCGGATACAAAAATCCAGGAG  
GGTTCAATTGGGACATCGTGCCGCCATTTACTGCCGGGTTTCAACAGCGGATCAGTCTTGTGAACGCCAGGAATTTGATCTGC  
GAGCCTTCGCCGGCCGTGCCGGCTACGACGTGGTGGGAATATTTAAGGAAACAGGTTCCAGGAACTAACTCGACCGGGCCG  
AGCGAAAGAAAGTCTGGCGCTTCCCAGTCCAGACAAATTGATGCAATCCTGGTCACTGAGCTTTCCCGGTGGGGGCGCT  
CGACGCTCGATCTGCTCAATACGCTACGTGAACTGGAGAAGTGGAAAGTTTCCGTGATAGCCATGAATGGAATGGCGTTTCGAT  
CTTTCGTGCGCGTATGGACGAATGCTGGCGACGTTTCTTTCCGGCATTGCGGAGTTTGAAGCGGGATCTCATCAGCGAGCGGG  
TCAAGTCAGGCCTTGCTGTTGCGAAGGCACGTGGTAAGAGGCTTGGTCGTAGGCCGGAGTGCAGACCAAATCAGACCGAC  
TTTTGCCTAAGGTGTTGCGATGAGGGCCGAGGGACGCAGCTATCGCTGGATCGCACGCGAGCTCGGTATCAGCAAGAATAC  
CGTCGCTGACATCGTGAACGACACAGAGCTAACGCTTAGGGTGTATTTCCGCTCAGCCGGAACCGACCCCAATAACACC  
GCATTACGGTATCCATTATCGGTTGTTGAACGTACTAATTATAAAGTCGTGAAATTGCAATTTCAACGACTTTTGTTTTAATT  
TTATGCAGCCTTCTTCCCGCGACTGCCCTTGCCTTACCCTTAAATTAGAACCCTGCTTCCCTCCGTGTTGCTGCCACTTCT  
CCACTGCCGATTGCTGGCCGCCGCACTGTTACCGCCTCTGAACGCATTACCGCAAACATGCCGTGGCTGCCATATTGCC  
AGCGCCTGCATCGAAGAACCCGTAGAGCGTCGCGGCGTCAGCAACTCCGGCGCTGATACCGCTACCCAGCTGGCGGCAAT  
TTGCGGAATCTGGAACAGAACGAAACGGAATGACCGTCAGTAATAGGCGGAGATAGAACCAGTGATTGATGAGTAAGCGGC  
ATCAGAGTTCATCGAGGACAGGAGGTTGTGGAACATCCGCATGATGAAACCAAACACGAGCGCAAGAATGACGACGACAAG  
GCCATAGTTAATGACCGACGCCAGCCAGCGAGCAAAGATGTTTTTGTGCTCCCCACAGCAGGCAGAAAGATCGCAATCGGG  
CCAAAACAAAGCGTAACGGCCAGAAGGATCTTAGCCATGATCACAAGCCCGCACCCGAGGCCGCCAGCACAAACGGTAGCA  
ATCATATAATGCCGCAATGGCATAACGCGGCCAGGCCGCTCGATGAAAACACGTCTGCGGCTTCCCATGCGGTGTTGACGAT  
CTTGATACCTTTTTCAATAACCGCTATCAATAATCGCCGGTACGCCACCTTGCACCGACTTTATTAGGGGCAGACAGTATCCCGGC  
AAATCATCCGGCAGTGAAGCGCCACGTTGACCAGTCTCTGTTGATACCAGCCGCCCGCGTTGCAAAGCGCAGGATAAGGG  
CTATGGAAGATACTCTTAATCAGCGAACTCAGGCTGTGCGCCGCCCGGATTAACGCTGAGTACATCCCCTGAACCATCA  
GCTTGATTGTCAGACAGGTGGCAATCAGAGGCGTTACATCAGAGATAATGGTGGCAACATTGGCGCTCACCATTGACGTAATC  
GCCCCGTCTACTTTTGCGAAAATGTCTGCGACTAGGGTGAATGCCATATTGCCTCCTTACTCCTAAATTTTCGGTGAATTGATTT  
CGCCGCATCTTTGCCGAACACAAACAGCTGACGATCGGCTTCCGCGCGGTTTTTGAATCAGGTTTCTGAACTTCATCCGCGT  
CTTCTTGCATTCTGAATTGTTGCCTTGCCTTCCATGTTTTTTCGTACCACTCCACGTGATGCGAGGCATCGCAGGCCAC  
TAGGAGGAAAGGGATAACAAGCAGTAGTTTTTTCATAATTACCTCCAGTTAATTGAAGGTGACGCGGTAACGTCCCCGCCG  
TTCCAAAACAAAATTGTTGGTGGCACGTTCTTTCTGCGCACGTAATAGCTTGTCTGTGACTGCTGCAACATGTTTCATCAGAT  
TCAGCTTCCGCTGCTCACCTGAATAGCACCTGTGACGCTGGATAACGGCCTGTAAGTCAGCAATCGATTTCCAGGTCTGGA  
GTCGTTTTAATCTGCTCCGTGAGCTCCTGCATATCGGTTAGTTTCTGCATCTGGTTGTTGTAGGCTTTTTCTGCCATAACACGGT  
CATAAGCGCCTTTTTCCAGCCAGTTTTTGTTCATGTAGGTAATTGCTTCGCTGGGCGTCATGTCGTCAACTTCCGCATTAACT  
GGCCCATCATGCTGTTAACTGAAGGCGTGACGGAAGAACTGGAGTTCATGGCGTCGCTGTAGATCTCCTTCCAGTTGTCCGG  
CAAATATTTGCCAGCGTGCTGGTAGACGTCCCCAGCAGATCGCCCAGGTTGGTTGTCTTTGCCATCGACTCATAATTTTT  
CTGCGTTTTGCAGCTGGCTTTAAGCTGCTCCAGCTGCTGCGCCATTTGCTGAAGCTGCTCGACCTGTTTAGCCAGCTCAGTAG  
GGTTGGTCACGATGATGCCTGCGGAAGCGCTTTGCGCGCCTCCAGTATCAGGCCGGTGGTCAGCAACTGCGGTCAGTGT  
TTTTTTCATGGTGTGTTGCTCGTTGTTAAGCCGTGAGGCGCCAGTATCTTTGAGCCATACTTCAGGGTCATTACCGAGCCGT  
TCAACCAGCTCATGCGCAATTTCCGGCGTTTTGTGGTTCACCGGACAACACGCTAAGAAGCTTGTCCATTGTCTTAATATCTGCA  
TCAATATCGTCGCTGTTGCGAGGGTAGAGATTGAAAGAAGCAATCGCAGACTGTTGCCCTGTTAACCAGGAACTGTCTGG  
AGTGTTCGGTAATCGACATCAGCGCGTCGTATTACGCGTCAGTAAGGAAGGCATAATCCTCTCGGATAGCTTCCGGATCGCGC  
AGGCAGATTTTTGTGACGGTCTGCGACATGATCGTGCGCCAATACGGCTGGACAGCGCATCGTTCCGGCTCCTGCGTGGCAA  
ACACATAGATAGCGTCTTCTTACGGTCAGTTTTGATAACCGCTTAACTTACGCTCGATAACCGGATCGTCAAGGTAGGCGT

GGA ACTCGTCAAAGCACTGAATGACGCGGCGTTTGCCGTCGATGGAGTCACGTACCCGGTACAGAAGGTACATCATGAGCG  
GAGTACGGGCGGGCTGGATACTTCTCTTTGGCTGCGATAAACTCGGATAAATCGAAGCCAAAAATATCATTGCGCTGAGA  
TCCAGGCTGTCTTTATCATTGTCAAACAGCCAGCCATACTGGCCTTCGCGCGTCCATTGCGCAGCAGCCCTTTCAGTGATACG  
CCATTTTCCACAACCTTATTACGTACCCGTCCAGGATAGTAACGGTGC GCGCCTCGCGTGGAAATAAGTGAGCCTTCCCCATA  
ACCGCATCAACGCCTTACGCCAGTTCGGTAGCCATCGTTGCGCTGATAGGCCGTTATTGGTGGTTTCCACACAAATGCGGAA  
CAGGTTTTTAATGAGGGCAATATTGCGTTTGGTTCGTTCAATCTGAAGCGGGGCAAACGCGACGGCATAACCTGTTGCAGAA  
CTTTATAGTAGCCACCAACGCTTCGAATGAACGGCTCCATAACCGCGTACGGTCATAAACA AAAAGCCGCGGGTTGTACTTC  
ATTGACTGCGCCAGCAGGAAGTTAAGCAGCGTGGTTTTACCTTCCCCGACATAACCCGTTATTAACGCATGGCCAGCGGGC  
GTTTACCGTAGGAAAGTTCTTCAAGCGGGGTCGCATGGAAATAAAATAGAGTGCGGTACCGCTGATCGTGCGGAACATGGT  
CAGCGCTGGCCCCACGGTTATTGTCAGGCTTGCCACGCATAAAATTGTGGAACGGGCTGAAGTGCAGGAAGTTCCATGA  
GTTTATCGGAACCGGGCGCGGCCCATTTCTGGTTGCCAGGCAGTCTCGCATAATATGCAGCCTCAGAGGCCAGGCTGAGA  
GTCCCGCAAACACGCCACAGCCGGTTAGCGTAACCTTACACGACGCGCTTTGCGCTGTACCGGTTTTGGTCAATTATCCCA  
GACATGCACGGTTCATGATGGTAGCCATCACGAACCTCTGGACGTCAGCATATCGAGCGCGGTACCAAGCTGTGCCAGCT  
GGCTTTGCGCACGGTCGCGCGTTTCTGCAAAGATTTTTCTGATGCGTCAGAAACGTTTTAGCTGAAGATTCAGAGAGGCA  
AGAAAACTCTGCGTCAGAAGGTATTCAAATCGGCTTCTTAAAGCATGTTAAGCTGGCCTGGCTCTGTATCTTCTTCGTATTC  
ACGAAATCAATGCCGGTGGTATAGAAGTTGTGATCGTCCCGTTCTGATCTGGACAACATCCCCCACAGTGAGCTAACAGGG  
CGGTTGTCATGATGTA CTACGGATACGATCACGGCAAACAGGCACGATGGCCATTCCATATTTGCGAGGAAATAAAGGAA  
CTCCAGCGCTTTTGAATAAGCGTGAGCCTGCGAAGGTT CAGGCTCGTTGCGTTCGATAACAATGGCTTCGTCAAAAATGTCTG  
ATTCATCGACTTCAGCAAGTTCTTACGTTCTTTTTATGGCGCAGGAATTTCAACACCGGTTTGTGCAGATAATATGATACCC  
AACTGCTGAATGCCATACGGCTTATTGCTTCCAGGATTTGTT CAGAAATATCTTCCAGACCTTCAAGCGCCTCATTCTGCATTC  
GCTGAATTTGTCACGAGTCGGCTTTTCAAATTCGCCAGA ACTTCTGTGTTTTATCCCTACCTGTTTGTAAATAACGGTCAGAT  
AAAGGTCATTAATCAGCTGCTTGGAAATCACCGTGCAGCTTACGGTTATATTGATCAACATAAGCAGGGAAAAAATGGTCATACT  
CACCATCCGGTACTCTTTAGCCTCATGGTGATATTCATGCGTCCACAGCTCTACATGGTCTGTTCCGAAGCTCTTGACCAGCG  
TGATTAAGGCTTTTATGCCAGGTGACCAGTTC CCGATCTGATGCGCAGTCATGTGTGCGGCCATCCAGCTTGAAAAAAGCCGA  
TCAGATCGCCGTTTTCCATCGAAATCACGTAATCATTGAGGTGATAAGAATAGGGCAAATACTTTTTATTTACTGATGGCTCCTT  
ACGGTAGGCATCAATTTTTTTGGCTTCGTAGCGGTGGCAGCTCTCATTATTTTAAACCTTACGTTTGTAGTCAACAGAGGAA  
TAAGACGATCCTCCCCACTGCTTAAACGGGAGAATCAAACCAATTA CTGAATTTGGTTTTCAACCACAGGCCCATAATTCGAAAC  
ATGCGGTGTCATATTTTGTAAATGCAGCTGAAGGAATCCACAAAAAGACGAACACCAGGATCGCCACATATGAATAATCATA  
AAAAGCGAGGCAGAAATCATGAATATCATCATAGCTACATTACGTGGTACACCCAGCGCGGAGGTAAGCGAGTCGCACCTTT  
GAAAAGCGGTCTTTTCCCGTCAACGAACATCTTTGTAGTCTCACTTTGGGGGACAAAAGTCCCCCTTTTTCGCGTTGTTCA  
GCTTCTACGCCGT CAGGAAACCAGAAATGATGCAGAACCAATACCAATCAGCGAGATTACGATACGAGGAATAAAGCTG  
GCTGGGATTACGTGAAGCATCCACATAAAGCAACTAACCATGATCGCAATAGCACAACCAATTGGAATCCATGTGCTCAACCA  
CGTCTGGATTGATGTAGCGGTTGATTCACCAGTATCGGTGCCAGCGGCCAGCGCAATTTGCGGCAGGGCAATGGACAAAACG  
CCCATAACTACCGCAGGGCCATACTTCTTAAACAACGTGGTCATACTTTCTCTTACTCACTATCTTCTGTTGATTGCAGATTTAA  
CCGGCATTCTTCAACGCCACACTTATCTTTCAAAA ACTCTGCCAGTAGCCTTAAATCAGCCCAGGTTTCGTAGTTCATGCTCTTTG  
TTAACCCGAATGGAACATGCGATCTGGCCCAACTGTT CATCGTCTATCTGAAAAACGGGATAACCAGTCTTTAATGAAACCCGT  
TTTATCGTTACCTCCTTCACTTTTCTGTTTCAAATAGCTCCAGGATCTGTGATTGCAATACAAGGTACAAACGTTCCATCCATAA  
CCTCACTCCCCCTTCGCTGTTTCTGTTTGGTTAAAAGGCATCCGTATTATTTCCGGCTGAAGGCATCGCCATCACCCGAACCA  
AAAACATCTTGTTCACCGTCATACTGCGTGGCCGTA CTTTTTGCCTGCTGAGGCTCAGTCGCGGTGCTGTCCTCACTGGTCTG  
GCCATCAGGTAGCAGCGTAGGGATTTCAAATCAGTTGATTGACGCGCCACGTTGATAACTTTCTGTACATAACCGTTAGAAA  
TCCCGTTTATGAGTGAGCCGGTGTGTAGCAGGAAAGCGCGTGTCTCAGCGCAACCTGCCCGGCTGGATAGGATTT CAGGGC  
GCTATCATAACAGGCTTTAAGGATGGTCTGGCTCGCCCGCAGGTTGATGCAGGGCTTGAAAATATCGTCAACCGAAAGACCC  
AGGCCACTAAATTTT GAGTTAATTTGTGCAAGGCCATATCAAACTTTTATTATCCTT CAGCAGAACTTTGAAACGCTGA  
CGGCCTCAGCTT CAGTACGTGGTTGCTGTTTTAACTGGGTA CTACCACCGTTAATATTGATCCTGTACGGCCCATTTGAGGACT  
CATGGCCGACGATGTACGCCATTGTTAAGGGTGA AACATCAGGCGCACATCTCTGCGCAAGCCTGGCAACTTCATCTGAGGC  
AGGCGCAGCACTGGCACGGCCAGCACAAGCAAGGCAGGCCAGAGCGAGA ACCAGAAGTTTTGGATGTTTACTCATTACGT



TTCACCGCGTAATTGTAATTCGACGACTTATGTTTTATGATAAGGGCTAATGAGATCGTGTCAAGAAGAAACGAAAAGAAAAC  
CTCTGAAGGAAGGAAGGTAATGCTGGTTCCCCTGAAATCAGAAAAACGCCCAAAGGTGAACCCATGTATCGTGACCCGGAT  
AACCTTTTTAATACGTGGACTGGTATAGGGAAGCGCCCGCCTGGCTAACTGCAAAATTGGACGCTGGCATTAGCCTGGAAG  
CCATGAAAATGCAGGGCGTTGCCAACCCAGAGAACATAGACAAGTAAAATACCGCGACCCAGGAACGCAGAAAATACCT  
GGTCCGGGACTGGCCGCCACCAACATGGCTCAAAGAGCTGCTTGATAGTGGTTTACTTGTATGATCTAAAGATATAACCG  
GAGAGTATAAAAATGGGCGATGTTATTGATTTTGC GGAAAAGCAAAAAGGCAGAAGGAAGAAAAGGCATTTTCCATTCCG  
CCCATTTTAAGAAAATCCGAGTCCATGCTATCAGGTTACTCGCCAGCATCATCAAATCCGGCTCTTATTCAAGTTGCTTATATCGT  
TAAGAAAATTACAGGAAAGTTAATTAAGTTGTTCCGAATGTTAACGATTTTCGTTTTTATTGTGCAATATATCGCAGGCGATATA  
GGTTACAAATCTATTTATAACTCTGCGTTATTATTAATATACTTACC GTTATCAACATTCTGGCGGGTGTATATCTGAACAACTG  
TTAAGGACAAAACAATGAAGAACTCTTAATCCCTCTGATAGCAGCTGGTAGTCTGCTTTATCTTCTGCCAGCCATGCTGAAG  
ATCCCTGCAAAGTTATTATGTGCATGGCGGGCAAGCTCACCGGCGATAGCGGCGGAAGCGAGTGTAACAGTGCTGAAGCTGC  
TTTCTTCAATATCGTTAAAAGAACAAGCACGGCTTTTTACCCAACCACACGAGGGATGCCAGGAAGGCTTTTCTTAATGAAT  
GCCCCGATAATGGCGAAGGTGGAAGTAACAGTCGATGATAAGCCAGATCATAAGTAAATACGGGAAAGTTCGCTTATAGGC  
GGGCTAGGAATAATCTCAATTTAAGGAGCCAACGTGAAAAAATTATATTAAGTGCATTAGCCTGTACAGCTCTCTTAACTGGT  
TGCGTCAGCCAAGATAAAGGTAATGCGATGCAGAGCCAGATGAATAACCAGCAACGCCAGATTAACGAATTATCCGTTTCGTTT  
GCAGTCTGCGGAGTCCCGCTATCAAAGCAGGAAGAAAAGCTGCGCAACGAACTGCTGCAATCCAGCGGCTATTGCTATCTG  
AATGGCGCCCGCTACTCGACCGGCACCGTACTTTACGGGCGGATTTGCCAAAATCAGTCAGGCAGCGCTTCGTGGCAGGTTT  
ACAGCCGTCGCTAAACACCAGGGCGGTTTAAACGCCCTTTTCTTTACCCACAGAAAGCACACTATCACCATGTTCCCCTTCCCC  
ACTACAGAAAACCTTATTCTATGGGCTTGCAGCGCCATCGCACTGTTTGCCGTTGTATTCTTCCGGCGTTCAGTACGCAACCGA  
CGACACAAAAGGAAGCAGCAAAGTGC GCGGGGCTGCTGGAGCGCATAAAGACGTTGCCGGGCTTCCACAAAAAATTAA  
CTACCTGAGGAAAATTGATCCTTTTGTGTTTGAAGA ACTGTTGCTGGAAGGATTTGAAGCGCATGGCGGCTTTGTTGAATAAA  
TCAGATTTCCGGTAAAGTCTCCCCGTAGCGGTTGTGTTTTCAGGCAATACGCACGCTTTCAGGCATACCTGCTTTCGTCATT  
TTGTTACAGCGCTCGTACCAGGGCCATAGCCTCTGCAACCTGACCATCGTAGTCACGCAGTGTCAGTGAACCTCCGAACAGCTG  
TTTTACCCGGTACATCGCCGTTTCCGCTATCGAGCGACGTTATAATCTGTTGTCCATTTCCACCGCGCATTACTCCCGGTCAGC  
CGCTGATTCGCAACAGCACGGTTACGGTCTGCATATTCACCGGGCCAGTAACCCGCGCCTTTTCGGGGCGGGATAAGCGCGC  
TGATTTTCTTACGCCGAGTTCATCGTGACAGAGCCGGGTGTCGTAAGCGCCGTCTGCCGATGCTGCCCTGATTTTTCTGTGA  
GTCTGCCGATAAGACCCGGGAAGGCTTCTGAGTCCGTACATTTGTTTCAGCGACAGGTCTGCACAGATGATTTTATGTGTGTT  
GCTGTCAACGGCCAGATGCAACTTTCGCCATATACGACGGCGTTCCTTTGCCGTGTTTTTTGACTTTCATTTCGCCTTACCCAAA  
GACCTTCAGCCCGGTGGAATCAATCACCAGATGCGCGATTTACCCCGGGTGAACGTTTTTGAAACTGACATTAACCGACTTTG  
CGCGCTTGCTGACACTGGTGTAAATCCGGGCAGCGCAACGGAACATTCATCAGTGTA AAAATGGAATCAATAAAACCTGTGC  
AGCCCGCAGGGTCAGCCTGAACACGCGTTAATGACCAGAACGGTGGTGATGGCGAGATCAGAATAGCGCTGAGGTCTTCC  
CCGTGATGAAGGCGTTGCCGACTCATAACAGGCCTGAATAGCTTCATCATCCAGCCAGAAAGTTATGGAGCCACGGTTGATGA  
GGGCTTTATTGTAGGTGGGCCAGTTGGTGATTTTGA ACTTTTGCTTTGCCACGGAACGGTCTGCGTTGTCCGGGAAGATGCGT  
GATCTGATCCTTCAACTCAGCAAAAGTTCGATTTATTCAACAAAGCCGCGCATGGCTTCAGAACCATCAGAAACAAACGCTAT  
ACCGGCGATGGAGGCATTGACGGCCAGGTAATAATAGGAAAATATCGCTATCTTATT CAGGCTAAACGCTATCGCGGCCATATT  
GCTTTACAGCACGTACAGGAGTTCGAGAAGTTGCTTAAACGTCATAACTGTCGCGGTCTGTTTTGCCATACCCGGGAAAACCG  
GCGCAGGTTCAAAATCTGT CAGTATTGCCAGTGAACGGATGGAGATTATCAGCGGCCAGCGCCTGATAGATTTGCTCACGCCC  
GGCAGCTCCTTCACTATCGCAACCGCCCCGACAGCATGATGAAGCGTACCCGAGCAACACTAGAAACGAGCACCATTGTTA  
AAGATGCCGTAAGAAAATCGATAACATGAGAGTTAATTAATGAAGT CAGTAACTATAGAAGCAAAAACATTTGCTGAAAT  
GTTAGGAATAACAGAAGGTGAATTAATCTTTGCCATTAAGAAA ACTGGCACATTCAAAAACAAGACCATCCACAACCTCATG  
AGCCACATAAATCAAATAATAGATTTTTATATT CAGACGTAATGAGGTTTATAGAATCACTAAAAGACAAAGAGAACCGGTAAT  
GACTCCA ACTTACTGATAGTGT TTTATGTT CAGATAATGCCCCGATGACCTTGT CATGCAGCTCCACCGATTTT GAGAACGACAG  
TGACTTCCGTCCAGCCTT GCCAGATGTTGTCTCAGATT CAGGTTATGTCGCTCAATGCGCTGAGTGTAACGCTTGCTGATAAC  
GTGCAGCTTTCCCTT CAGGCGGGATT CATA CAGCGGCCAGCCATCCGTCATCCATACCACGACCTCAAAGGCCGACAGCAGG  
CCCAGAAGACGCTCCAGCGTGGCCAACGTGCGTTACCTAACAATAAACCTGTTTAAATATCCAGATAAAAACATTCAATCTGG  
GTCAAATGAGTGATACAGTTTTACCCATAAGACCCAATGGAGGCAATATGTCTGAATTTGAATTACTGGCGCAGGATCTGCTTG

AGAAAGCAGAAGCGGAAGAACAACCTGCGACAGGAAAATTATAAAAAGCTGCTCGGGCAGGTGCTGGAAATCTATGACCAG  
AAGTACGTGGCTGAACTGCTTAGAAAAGTTGGTAAAATGAGTGGAGTCGCGAGACTCTTAATCGCTGGATTAATGGTAAGT  
GCTCACCTAAGACGCTGACGTTAGCCGAAGAGGAACTTCTACGAAAATGCTTCCGGAAGCGCCTGCACATCACCTGACTA  
TGCTTCCGGTTTATTGACCTGTTTGTGGGATTGGAGGTATACGGAAGGGCTTCGAAACCATCGGTGGCCAGTGCGTTTTTA  
CCAGTGAATGGAATAAAGAGGCTGTGCGCACATATAAAGCTAACTGGTTTAAACGATGCTCAGGAACACACTTTCAATCTCGAT  
ATTCGGGAAGTCACGCTCAGTGATAAACCTGAAGTACCTGAAAACGATGCCTATGCTTACATTAATGAGCATGTGCCGGATCAT  
GATGTACTTCTAGCAGGTTTCCCCTGTCAACCGTTCAGCCTTGCGGGCGTAAGCAAGAAAACTCGCTCGGGCGCGCGCATG  
GTTTCGAATGTGAGGCTCAGGGAACGCTTTTCTTCGATGTGGCGCGTATTATACGCGCAAAAAACCTGCCATCTTTGTTCTT  
GAAAACGTTAAAACCTGAAGAGCCATGACAAGGGTAAAACCTTTAAAGTCATCATGGATACCTCGACGAACTGGGCTATG  
AAGTTGCGGATGCAGCTGAGATGGGCAAAAACGATCCTAAAGTTATCGACGGAAGCACTTTTTACCTCAGCACCGAGAACG  
TATCGTTTTGGTCGGTTTTCCGTCGTGATCTGAACATTCACCAGGGCTTTACCCTGCGCGATATTAGTCGTTTTATCCGGAACAG  
CGTCCGTCATTTGGCGAACTGCTGGAACCCGTGGTTGACAGCAAATATACTGACGCCGAACTCTGGGAGTATCTCTATAAC  
TACGCCAAAAAGCACGCAGCTAAGGGTAACGGATTTCGGTTTTGGCCTCGTTAATCCTGAAAATAAAGAAAGCATTGCCCGTA  
CGTTTTCTGCTCGCTATCACAAGACGGGTCTGAAATTCTGATAGACCGTGGCTGGGATATGGCCACAGGTGAAACAGACTTC  
GCCAACGAAGAAAATCAGGCGCATCGGCCCGCAGGCTGACTCCACGAGAGTGCAGCGCGCCTTATGGGTTTTGAAAAGTA  
GATGGCAGGCCTTTTCGATTCTGTGTGACACTCAGTCGTACAGGCAGTTCGGTAACTCCGTAGTGGTGCCCGTGTGTTGA  
AGCCGTAGCCAACTGCTTGAACCTTATATCCTGAAAGCGGTTAATGCCGATTCGTGCAAGGTTGAACGAATCTGATCGCTCC  
TCCCGTATTTATGCCGAGATAATCTATGGAATATCTGCGTAAAGCCCTGTCAGCTCAGCAATAAACGCACCTAGCGTCATTAG  
CTCAGCTCTCACCGCCTCCGGTATTTTTGTGACGCGATGATGGCACGACCAATCTGACACCCGACTCCCGCATCTCCCGATA  
TTGAGCCAGAGAACTCCCTCTGGAGTGTAACAGATGCACCTGATGAATTTATCGGCCCTATTAGTATCTGACGCCAGC  
GATCCTTACAGGTAGTCTTACTGACTGCCAGCATGCGCAGATTTTCTACGGGAACTCAGTATCGTGTAAGCCCCTGCGGAAGG  
GAAAAGGAAATCGGGTTTTTATTACCTTCTGTGATGGCCTGCGTCGCAAAGTGTGCGAGGCCGTGCTCAATGAATAGATGCT  
CCAGGTGCAGTTCAGAGACTTCCCGGCTCTGGATTTACGGCGATTGCTGACAGAATTGGCCAGCGCAATAAATGGCACTGT  
TGCAAAGTTAGCGATGAGGCAGCCTTTTGTCTTATTCAAAGGCCTTACATTTCAAAAACCTCTGCTTACCAGGCGCATTTCGCC  
AGGGGATCACCATATAAATGCTGAGGCCTGGCCTTTGCGTAGTGACGCATCACCTCAATACCTTTGATGGTGGCGTAAGC  
CGTCTTCATGGATTTAAATCCCAGCGTGGCGCCGATTATCCGTTTCAGTTTGCATGATCGCATTCAATCACGTTGTTCCGGTAC  
TTAATCTGTCCGTGTTCAACGTCAGACGGGCACCGCCTTCGCGTTTGTGACAGAGCAAGCGCGGACCATAGGCGGGCGCT  
TTATCCGTGTTGATGAATCGCGGGATCTGCCACTTCTTACGTTGTTGAGGATTTTACCCAGAAACCGGTATGCAGCTTTGCTG  
TTACGACGGGAGGAGAGATAAAAATCGACAGTGCAGCCCGGCTGTGACGGCCCGGTACAGATACGCCAGCGGCCATTG  
ACCTTACGTAGTTTTATCCATGTGCCACGGCAAAGATCGGAAGGGTTACGCCAGTACCAGCGCAGCCGTTTTTCCATTC  
AGGCGCATAACGCTGAACCCAGCGGTAAATCGTGGAGTGATCGACATTCCTCCGCTTACGCCAGCATCTCCTGCAGCTCAC  
GGTAACTGATGCCGATTTTGCAGTACCAGCGTACGGCCACAGAATGATGTCACGCTGAAAATGCCGGCCTTTGAATGGGTTT  
ATGTGCAGCTCCATCAGCAAAAGGGGATGATAAGTTTATCACACCGACTATTTGCAACAGTGCCTTATTTGAGCATTTCCTT  
GCGAAAAAGCCGACCGGGAAAATTGACATGCGTACCATTGCGCTGGGGTGTAAATAAGGCGATAGACACCGGTACCTACACAT  
TTACCTTCCGCGACAAATCAACGGTTTTCAGCCCGCTACACATTCATTTATGCATGGGACGGTAAAGAGTGAAAAATTTCCACA  
CACCACTCTTACGCGATGCCTGAAGGGTAAAAGCTGTGACGGGGCGGAATATTCACCGCTCCCTGAAGACTAGCCAATAA  
TCGCGATGCCAAGACGTTCCATGAGCAACGATGCCTGGTAGTTGTCCAACCTAACGCCTTGTAATCAACGCGCCGAATATCTA  
AGTACCCAACTCCGAATTGGTCAGATCGCAATGTGTGAAGTTTGTGCTCGCCAGTCGAAAGTCGAAAACCTCGCCGCCGGA  
GAGATCTGAACCACTGAACGTCGCGCCAGTACCTGGGCCCCATCCAACGGTTTTCCACAGCTCACACTTTTCCAACACGA  
CTTTCGAAAATTTGGCGTAGCTTAGATTTGTGTTAGTGATATATGCACTGCAAACAGGTGCGAGTAGTGATCATATTCATAA  
AACTTGCGCCGCGAAAATCTGCGCCTTGCACAGCAGTGGCGAATTTCAATGCCAAGCGCACTGGCATTGCGAAAATCCGC  
CATGGATAAATCACAGCTTTTAAAATGGCATCTTTCAGCATCGCACGACTAAAATGCAACCCTTCTGGCTTTCACGATCATAG  
AACTGACAGCCGATAAATCAGTGCCGCTCAGGTGCGCACCTGAAAATCACAGTAAAAAATGTAATTTTTCAATTTTCTCA  
CCGGTGAAGCGTTTTCTGTTAATTTTTTCGCCAACGAGTGCCAGAGCCATATTTGTGCCTGTTTTTTTATACAGTAATGGCGT  
CATGGTAAACCCTGATGAGGTTATGCGTCAAATCCGCCAATATAACATCTGCAAATGTGCGTTAAATCTGGTGTTTTTTTCAGCAA  
AGCGCGAAGCTGATGGTAAAGTCAGACCCAGTAATTCAGCGGCTTTTTTCTGGTTAAATTTTGCCTGCTGTAAGCTGGTTTTGTA

GAAAGTCTTTCTCTTGCTGCTGCTGGAATTCACGCAGATCCAGCGGTAACCCTACAGACATCGGTTTAGTTTTCCGGCGCCTGC  
GGCTGCGTCTGGTTCTGAAATCCATCCCTGTCGGTGTGCTTATGCAGTCTGGTCGGGACTCGGCGTCGCATAATTACAGCCA  
TTGCCTGGTTGCTTCATGGGCAAAGCTTGATGCGTGGGGCTTTGTAGGTATGGGGCTCATAATTGCTGCCTTTTTGCTCGCC  
CGATCCCATCGTGGAAGTCGCTGCGGAGGCCGACGCCATGGTGACGGTGTTCGGCATTCTGAATCTCACCGAGGACTCCTT  
CTTCGATGAGAGCCGGCGGCTAGACCCCGCCGGCGCTGTCACCGCGGCGATCGAAATGCTGCGAGTCGGATCAGACGTCGT  
GGATGTCGGACCGGCCAGCCATCCGGACGCGAGGCCTGTATCGCCGGCCGATGAGATCAGACGTATTGCGCCGCTCTTA  
GACGCCCTGTCCGATCAGATGCACCGTGTTCATCGACAGCTTCCAACCGGAAACCCAGCGCTATGCGCTCAAGCGCGGCG  
TGGGCTACCTGAACGATATCCAAGGATTTCTGACCCTGCGCTCTATCCCGATATTGCTGAGGCGGACTGCAGGCTGGTGGTT  
ATGCACTCAGCGCAGCGGGATGGCATCGCCACCCGCACCGGTACCTTCGACCCGAAGACGCGCTCGACGAGATTGTGCGG  
TTCTTCGAGGCGCGGGTTTTCCGCCTTGCGACGGAGCGGGTTCGCTGCCGACCGGCTCATCCTCGATCCGGGGATGGGATTT  
TTCTTGAGCCCCGCACCGGAAACATCGCTGCACGTGCTGTCGAACCTTCAAAGCTGAAGTCGGCGTTGGGGCTTCCGCTAT  
TGGTCTCGGTGTCGCGAAATCCTTCTGGGCGCCACCGTTGGCCTTCTGTAAAGGATCTGGGTCCAGCGAGCCTTGCGGC  
GGAACCTCACGCGATCGGCAATGGCGCTGACTACGTCCGCACCCACGCGCTGGAGATCTGCGAAGCGCAATCACCTTCTCG  
GAAACCTCGCGAAATTCGCAGTCGCGACGCCAGAGACCGAGGGTTAGATCATGCCTAGCATTACCTTCCGGCCCGCCGC  
TAAATATCTCCTTTGGGTTGTTAATAAAACATCCAATAAGTTGACTGTGCGTGAAAAAGAAAGTTTTGTGTGATGGCGTTGAA  
GATCGCACCGTTAAGCTCTTATGTGGGATGGTGCAGAGCTCGACGACTACCGATAAAACGCAACCGCCGAAACAGACAAGA  
AAAAGCCCCAACTGATAACAGTTGGGGCTTCACTATTGTGATTGGTGGAGCAATAGCACCCCTGAACCCAAAACCTTCTCGCTC  
AACCGGTAGTGGCTGATAACAACCTCGTGAGGGCTATTGCGGGTTAAGCATTTAGCGATGTCTAGGGCCAGACTGGACGTCTG  
AACGCAAGCCGCTGATACTGTACATAACCACAGTATCAGCGGAGGATACCCATGTCGCTGGCAAGGAACGCCACGGCGAGTC  
AATCGCCCACTCAAACAACGGTTACGAACGCCACCAACCCGACCAGACGCTGCTCTACCAGCTGGTTGAGCAGCACTACCC  
AGCCTTCAAAGCCTCACTCGAAGCCCAAGGTCAACACCTGCCTCGCTACATCCAACAAGAATTCAACGACCTCCTCCAATGTG  
GCCGTCTGGAGTATGGTTTCATGCGGGTTCGCTGCGAGGATTGTCATCACGAGCGTCTGGTGCCTTCAGCTGTAAACGACG  
CGGCTTTTGCCTAGCTGCGGTGCCCGCCGGATGGCCGAGAGTGCGGCGCTGCTGATAGACGAAGTCTTCCCAAGGAGCC  
CATTGCGCAGTGGGTGCTCAGCTTTCCTTCCAGCTACGCTTTTTGCTGGCTCGCCATCCCAGCTGATGGGCCAGGTCTTGA  
GTATCGTCTATCGTACACTCTCAACTCATCTGATCAAAAAAGCCGTTACACCAAAGCCTCTGCACAACTGGCTCAGTGACTC  
TTATCCAACGCTTTGGCTCCGCGCTAAATCTCAATGTCCACTACCACATGCTGTTTCTCGATGGTGTCTATGCCGAAGATGACTA  
TGGAAGCAACGCTTCCATCGTGTCAAGGCACCCACTTACGATGAGCTGAATACGCTCGCTCACACCCCTCAGCCATCGCATCG  
CTCGCTGCATGGAAAAGCGTGGGATTTGGAGCGTGATGCCGAGAATACGTGGTTGACACTGGAAGAGGGCGAAGACGATA  
CGCTGACTCAATTACATGGTGCTTCGTTACGTATCGCATTGCCGTCCGCCCCAGCAAGGGCGCAAAGTCTTACCCTGCAA  
ACCTTGCCAGGGCGTGAGGATAAAGCCGACTCAAGCAGTCGAGTAGCCAACCATGCTGTTTTCTCGCTACACGCCGGTGTGA  
TGGCCGAAGCGCATCAGCGGATAAGCTTGAGCGCTTGTGTCGCTACATTAGTCGGCCAGCGGTTTTCAGAAAAACGTCTGGC  
ATTAACCGCAATGGGCAGGTGCGTTACGAGCTCAAACTCCGTACCGCAATGGCACCACCCATGTGATCTTCGAGCCGCTG  
GACTTCATCGCCAACTCGCTGCGTTGGTACCTAAGCCGCGAGTCAACCTCACACGCTTCCACGGCGTCTTTGCACCGAACA  
GCAAACACCGAGTTCAAGTAACACCCGCCAAGCGGGCAAGAAGCCCGACAAATCGGAAGGTCTCGATACTAACTGGCGTG  
ACAAGAGTCCTGCAGAGCGCCACCGCGCCATGACCTGGATGCAACGCCTCAAGCGAGTCTTCAATATTGATATTGAAGTCTGC  
GAACACTGCGGCGGTACGTCAAAGTGATTGCCAGCATCGAAGATCCGAAGGTCATTGAGCAGATTCTCAAGCATCTGAAAC  
AGAAAACAGCCAAGGCGAATGCCGCAAGCAGCGTGAGCTGCCACCAGAACGAGCGCCGCACTGACTCCCAGCCTGTTT  
GATCCATCACAGAGTCGCTCTTTGACTGACGACCCCAAATCCAACACTGCTCAACACTGCCAACTTTTAAACGGGGCGGTGG  
GGCAGTTTGTATCTCTCGAGCTATCAGGCTAGAGATTTTACCGCAAATCGAACCTTATTAGAGCGGTTTAGGCTGGACCGGC  
AGTTAAATTTGGGGCTTGAGCGGTAAACGAGTGAGGGAATTTAGGTAAGATACTTCGGATGAGGAGCAAAAAGGTGGTTT  
ATACTTCTATACCCAGTAGTGTCCCTGTCGGTTTGGTTGGGGTCGATGCCCCACTTTGGGCGCGGCGTTGGGCGCCGCAA  
GATGAAAGCTCTGTGTGAAGGCTTGATATTAAGACCTTGATGATTTCAATGCCATCACCGAAGAGCAGATCGTTAGCGTGC  
ACAAATTCAGCTACAAAAGTCCGCAAAAAGTCTTGCAGGTATGGCTGAACATGCCGAGCTATTCAACAAGATTCAATCAATC  
ATCGGGTTCAAACAGCAGGTCACTTCGGGGATCGTTTTACCGGTGAGAAGATCGTGATCACCGTTTTCTGTACGCGGCCTT  
GGAGAAGCTGATTGAAGCTGAGGGTGGTGAAGTGCAATCATCAGTCTCGTCGAAGACCACCATGGTGATCGCGGCATCCACT  
TCCGGATCTTCCGGCAAATTGAAGAAAGTGACGATCTCAACAACAGCGGAAAGGCAAATATCAAACCTGATTGATCTGGCCA

CCTTCCGTAAGCAATATCTGGAACAACCAGCATCGACTGGTTTGGAGTTTTAATGAGTCACCCACAACCTTGAGCTAATAGTCGC  
TGTGGATTCTAAGTTGGGATTCTGGGAAAGGCGGCAAGATTCCATGGAAATGCAAAGAAGACATGGCGCGATTTACGCGGAT  
TTCTAAAGAGATCCGCGTGTGCGTTATGGGGAAACACACGTATACTGACATGCGTGACATGCAGTTAGAAAAGGATGGCGCC  
GAGGAGCGAATCAAGGAGAAAGGAATTCTCCCCGAACGCGAATCGTTTCGTGATCTCCTCGACGTTAAAACAAGAAGATGTC  
ATAGGCGCTACTGTGTTCTGATCTTCGTGCTGTGATCAACCTGTATGAGAATACCGATCAACGCATTGCTGTCATTGGTGGG  
GAGAAGTTGTACATTCAAGCTCTTTCATCAGCAACGAACTGCACATGACCATAATTCCAAGAGAGTTGACTGTGATCGATT  
TATTCCTGTTGATCCGATCCAGAACAATTTTCACATTGATTCCAGTGCCAGCGAGACTGTGGAGGCAACCGTTGATGAGACTC  
AAGAGCGCATTCACTTTGCTACTTACGTGCGTAACAATCAGTAACGCGCTGGCAGTGGAAGAACAAGAACCAGAAACGAAG  
CAGACGGTGTGGCCGTCTGCTTCGAAACATCATTATTGGCTCGAGAACTGATCGAGAATACCATTCTGCGGACGACATCCA  
AAACAATACAGAAAAGATAGCTTTGCAGTTGTGCGAGCCCCTCCCCCAACTTATAATGGGATTATTGCTGGGCTAAACAATG  
CTGTCGCCATGCGTGGGACAGCAAACGTTGAATCGCCATCAAGAGCATCCACAGATTTACGTGCAGCCGTCATCGGTTTATGG  
TGTATAAATGACACCATAGCCGCCCTGAATCAGACTGATAATGCAGTCTTACAGGACGGCGAGTTGCAACAAACACTTGTGCA  
TTATTACAACAACCTTATTGGCTGACATCGTTTGTGTTTTTCAGAAGACGGCTGCACTGAACGTCAGAAGCCGACTGCACTATA  
GCAGCGGAGGGGTTGGATCCATCAGGCAACGACGGGCTGCTGCCGGCCATCAGCGGACGCAGGGAGGACTTTCCGCAACC  
GGCCGTTTCGATGCGGCACCGATGGCCTTCGCGCAGGGGTAGTGAATCCGCCAGGATTGACTTGCCTGCCCTACCTCTCACT  
AGTGAGGGGCGGCAGCGCATCAAGCGGTGAGCGCACTCCGGCACCGCCAACCTTTCAGCACATGCGTGTAAATCATCGTCGT  
AGAGACGTCCGAATGGCCGAGCAGATCCTGCACGGTTCGAATGTGCTAACCGCTGCGGAGCAAGGCCGTCGCGAACGAGT  
GGCGGAGGGTGTGCGGTGTGGCGGGCTTCGTGATGCCTGCTTGTCTACGGCACGTTTGAAGGCGCGCTGAAAGGTCTGGT  
CATAATGTGATGGCGACGCACGACACCGCTCCGTGGATCGGTGCAATGCGTGTGCTGCGCAAAAACCCAGAACCACGGCCA  
GGAATGCCGGCGCGCGGATACTTCCGCTCAAGGGCGTCGGGAAGCGCAACGCCGCTGCGGCCCTCGGCCTGGTCCTTCAG  
CCACCATGCCCGTGCACGCGACAGCTGCTCGCGCAGGCTGGGTGCCAAGCTCTCGGGTAACATCAAGGCCCGATCCTTGGA  
GCCCTTGCCCTCCCGCACGATGATCGTGCCGTGATCGAAATCCAGATCCTTGACCCGAGTTGCAAACCCTCACTGATCCGCAT  
GCCCGTTCCATACAGAAGCTGGGCGAACAACGATGCTCGCCTTCCAGAAAACCGAGGATGCGAACCACTTCATCCGGGGT  
CAGCACCAACCGCAAGCGCCGCGACGGCCGAGGTCTTCCGATCTCCTGAAGCCAGGGCAGATCCGTGCACAGCACCTTGCC  
GTAGAAGAACAGCAAGGCCGCCAATGCCTGACGATGCGTGGAGACCGAAACCTTGCCTCGTTCCGACCCAGGACAGAA  
ATGCCTCGACTTCGCTGCTGCCCAAGGTTGCCGGGTGACGCACACCGTGGAAACGGATGAAGGCACGAACCCAGTGGACAT  
AAGCCTGTTTCGTTTCGTAAGCTGTAATGCAAGTAGCGTATGCGCTCACGCAACTGGTCCAGAACCTTGACCGAACGCAGCGG  
TGGAACGGCGCAGTGGCGGTTTTTCATGGCTTGTATGACTGTTTTTTTTGTACAGTCTATGCCTCGGGCATCAAGGCGAGCTC  
AGAGACCATGGAAAGCATGTTCTCGACTTACGTAGCAACTCGTTTTCTTTTCGAGGTTGAGCCACCTCCGCGCTTCATCAGA  
AAACTGAAGGAACCTCCATTGAATCGAACTAATTTTTTTTTGGTGAATCGCATTCTGACTGGTTGCCTGTCAGAGGCGGAGA  
ATCTGGTGATTTTGTTTTTTCGACGTGGTGACGGGCATGCCTTCGCGAAAATCGCACCTGCTTCCCGCCGCGGTGAGCTCGCTG  
GAGAGCGTGACCGCCTCATTGGCTCAAAGGTCGAGGTGTGGCTTGCCTCGAGGTGATCAACTGGCAGGAGGAACAGGAG  
GGTGCATGCTTGGTGATAACGGCAATTCGGGAGTACCGGCGGCTGATCTGTCTGGAGCGGATTTGCTCAAAGCGTGGCCGT  
CAATGGGGCAGCAACTTGGCGCTGTTACAGCCTATCGTTGATCAATGTCCGTTTTCGAGCGCAGGCTGTGCGAATGTTCCG  
ACGCGCCGTTGATGTGGTGTCCCGCAATGCCGTCAATCCCGACTTCTTACCGGACGAGGACAAGAGTACGCCGACGCTCGAT  
CTTTTGGCTCGTGTGCAACGAGAGCTACCGGTGCGGCTCGACCAAGAGCGCACCGATATGTTGTTTGCATGGTGATCCCT  
GCATGCCGAACCTTCATGGTGGACCCTAAAACCTTCAATGCACGGGTCTGATCGACCTTGGGCGGCTCGGAACAGCAGATCG  
CTATGCCGATTTGGCACTCATGATTGCTAACGCCGAAGAGAACTGGGCAGCGCCAGATGAAGCAGAGCGCGCCTTCGCTGTC  
CTATTCAATGTATTGGGGATCGAAGCCCCGACCGCGAACGCCTTGCTTCTATCTGCGATTGGACCCTCTGACTTGGGGTTG  
ATGTTTCATGCCGCTGTTTTTCTGCTCATTGGCACGTTTTCGCAACCTGTTCTCATTGCGGACACCTTTCCAGCCTCGTTTGA  
AAGTTTCATTGCCAGACGGGACTCCTGCAATCGTCAAGGGATTGAAACCTATAGAAGACATTGCTGATGAACTGCGCGGGGC  
CGACTATCTGGTATGGCGCAATGGGAGGGGAGCAGTCCGTTGCTCGGTGCTGAGAACAATCTGATGTTGCTCGAATATGCC  
GGGAGCGAATGCTCTCTCACATCGTTGCCGAGCACGGCGACTACCAGGCGACCGAAATTGCAGCGGAACCTAATGGCGAAG  
CTGTATGCCGCATCTGAGGAACCCCTGCCTTCTGCCCTTCTCCCGATCCGGGATCGCTTTCAGCTTTGTTTCAGCGGGCGCG  
CGATGATCAAAACGCAGGTTGTCAAACCTGACTACGTCCACGCGGCGATTATAGCCGATCAAATGATGAGCAATGCCTCGGAAC  
TGCGTGGGCTACATGGCGATCTGCATCATGAAAACATCATGTTCTCCAGTCGCGGCTGGCTGGTGATAGATCCCGTCCGGTCTG

GTCGGTGAAGTGGGCTTTGGCGCCGCAATATGTTCTACGATCCGGCTGACAGAGACGACCTTTGTCTCGATCCTAGACGCAT  
TGCACAGATGGCGGACGCATTCTCTCGTGCGCTGGACGTGATCCGCGTCGCTGCTCGACCAGGCGTACGCTTATGGGTGC  
CTTCCGCAGCTTGGAACGCGGATGGAGAAGAGGAGCAACGCGATCTAGCTATCGCGGCCGCGATCAAGCAGGTGCGACA  
GACGTCATACTAGATATCAAGCGACTTCTCCTATCCCCTGGGAACACATCAATCTTACCGGAGAATATCGTTGGCCAAAGCCTT  
AGCGTAGGATTTCCGCCCTCTCCCGCAAACGACCCCTAAAAGCCGTTTCTCTGTATAAAAGATCAGCTAAATTATGTGTATTGC  
ACAATACATATATGTGAGGTTAGCAGTGAATTTGCCTACGCCGAAACCTACGATGAACTTCAGAGAGCCTACGATTTTTTCAA  
TGAGAAGCTATTAGCAACGAGCTGCCGCCATGCCTGATAACGTTGCAGCGTGAGAAGCGAACGTATGGCTATTGTTCTTTA  
AGCGTTTCGTGCGCCGTGAGAGTGGGTACACGGTAGACGAGATCGCTATGAATCCGGTGTATTTCTCGATCAGAACCATAAAG  
GCCACGCTTTCAACACTGGTGCATGAGATGGTTCATCAGTGGCAATTCATTTTGGCGAGCCTGGCCGCCGTGGCTATCACAA  
CAAACAGTGGGCGGCCCGGATGGAACGGGTAGGACTAATGCCTTCTGATACCGGCGAACCGGGAGGCAGGAAAGTGGGCC  
AGAGCATGACCCATTATATTATTGCCGGTGGCCCTTTTCGATATGGCCTGTGATGAACTGCTGACAGGCCATTTCCGGCTTTCT  
GGATGGACAGGTTTCCGCCTTACCAGCCTAAGCCTGGCGCTGTGCTAAGCCCTACAGGAAAAGGCTATATTGACGACGAGGA  
AGATGATAGCGAACACGAACAGGAGGTGGAGGAAGGGCGCGACCCGGTTGAACTCGACGACGAGATCATAGAGGCCATGC  
GATTTGTAACCCACCGCCTGAAGCACCGGTGAACAAAACAAACCGGGAAAAGTACAGCTGCCCGGTGTGTCATATCAATCT  
CTGGGGTAAACCGGGGATAGTGGTTACTGTGGTGGCGAGCACTGTAATAAAGCCGCGTTAGTAGTCTTAAATAAAGTCCTT  
TCGGACTTTATTTTTTTTCCATTTCCGAGGTCGTGATGTTAATGCTGTACTTCGCGCTTCTTTTAAACAGTTTTAGCAAG  
GCTTGCTGGTATCCAGACCTGAACTAATTTAATGGTTCGCCGTTCTCGGCTTAAAGAGTGGTGTCTGTTACAAATCCCAGAT  
TCGCTTAACGGTGTGGAAATGTTTTGCTTGGAACGGCCTACTCGCGTGGCTACGTCTGATGATTTCTCACCTTTGACAAGCA  
CGGAATAGCCAATATCTGTTGTGATGTGTGCAAAGGAAGCCATTTGCGGCAGCAGCTGTTTCCATTCTGTTTCTGAAATTCTGT  
TTTTCTGAGCCATCTGTGGCGCTCCGTAGTTTTGGTTACAGAAAGGATATACTCAGAATAAACAGGGGTCAATACAAGTACG  
ATTTTTATAAAGCTTTATTTTATTGAGGGTGGAGCCCGGTGCGGCAGCAGCGCGGGCCTCGATGGTGGCGCAAGGTGCTGG  
CGCCATGCTCGGATTAACATGAACCGTGAAGAACTGCGAACTTGTTCGCGGTTCTGAGGGGTTGACCGAGCCGCGA  
AGCGGCGCTGGTAAGCGATGATATGCACATATCCACAGGCATATTTTAAAGGGGGCACTGTTGCAAAGTTAGCGATGAGGC  
AGCCTTTTGTCTTATTCAAAGGCCTTACATTTCAAAAAGTCTGCTTACCAGGCGCATTTCCGCCAGGGGATCACCATAATAAAA  
TGCTGAGGCCTGGCCTTTGCGTAGTGACGCATCACCTCAATACCTTTGATGGTGGCGTAAGCCGTCTTCATGGATTTAAATCC  
CAGCGTGGCGCCGATTATCCGTTTTCAGTTTGCATGATCGCATTCAATCACGTTGTTCCGGTACTTAATCTGTCGGTGTTC AAC  
GTCAGACGGGCACCGCCCTTCGCGTTTGGAGCAGAGCAAGCGCGCACCATAGGCCGGGCGCTTTATCCGTGTTGATGAATCG  
CGGGATCTGCCACTTCTTACGTTGTTGAGGATTTTACCCAGAAACCGGTATGCAGCTTTGCTGTTACGACGGGAGGAGAGA  
TAAAATCGACAGTGCGGCCCCGGCTGTGACGGCCCCGGTACAGATACGCCAGCGGCCATTGACCTTACGTAGGTTTCAT  
CCATGTGCCACGGGCAAAGATCGGAAGGGTTACGCCAGTACCAGCGCAGCCGTTTTTCCATTTACAGGCGCATAACGCTGAAC  
CCAGCGTAAATCGTGGAGTGATCGACATTACTCCGCTTACAGCCAGCATCTCCTGCAGCTCACGGTAACTGATGCCGTATT  
TGCAGTACCAGCGTACGGCCACAGAATGATGTACGCTGAAAATGCCGGCCTTTGAATGGGTTTCATGTGCAGCTCCATCAGC  
AAAAGGGGATGATAAGTTTATCACACCGACTATTTGCAACAGTGCCGGTCCCGGGAGTCAGCAGATCGACGTCAACGCCG  
AGCAGCGATTTAGTTCTTCTTCCAAATCGCCAAAGTCCAACAACGTGGCACCGGGCAGCGCATCGACCAACAGGTGAGGT  
CGCTGCCATCCCGTCCGTTGCCATGCAGCACCGAGCCGAAGACGCGCGGGTTCGCGGGCGGAAAGCGGCCTACCGCTTAC  
GCACTGCGCTTCGCTTTCATGTCAAGCACAACAGACGGTGCATGCGCATCCTTTCTTATCGAAACTCGTTGAGATGATATGCAA  
TCAAGAATAGAATTTCAAGAACTCACAAAGTAACGCGGTGGTTAATATCCTGTACCCACGGATTGCCCTTAGCGCTGCCTATAT  
CGGCTAAAGCACTCCGGTAGCTTGATTCACCCACGGCCACGGCAGGATCTTGGCCGTCGCAAGCGCCAGGGGAAAATCTT  
CAGCTGCAAGCCTGAGTGATTTTCATGTGCGTGAATCCATCGCCAGATGATTTTTGTGAAGAAGAACTCGCGCTCGTTTCATG  
TCCGGGCGCGCTCCTGGCCCTCCGTGCCAACGGCCAGCAAGTAATCGGCCTGAATTGGCAGTATCAGCGCGCTAGTAAGT  
CATGGATCGCCGTTGCGGCAGTCTGCGCGCCAGATTAATTACCCGGTCCGAATTCAGTTTATCCTGCTTGCCTTGTCCGTCT  
GCTCCATCAGATTTTCATGGCCCCCTTCTTCATGCTCATGCTCATGGGTGTGTTCTTTCCGGTATGGCTCTGTTCCGCCTGAGAC  
GTCTGCGCATGGCGTAATCGTCGTAATGCTGCTGTCAAAGTCGTAGTCTGATGCTTCCGCATAATGCTCGTAATCGGCATAC  
TCCTGCGCGCTCCACTGCTGATCGTGGCAGCAGCATAATCATGGGCCAGCTCTGCATCATTTTGTGCTGTGCTTTCATGACGCCG  
AGGCCAACGGAATCATCCATAGGGTTCTGCTTAAAGATGAAAGCGTCTCTGCGTTGCTCACCGGCTGATAATCAGTGCCGGT  
TGTCATGTTATGTTTCATCGGGTTTCTGGTTAAACGCCATGCTTTCCCCCGTGGCTTCTGGCAGACCTTTTTAGCTGATCGGGT

TTCTAAACTGGTATCGCGGCCAATATCCTTAAACCTGGCCTCAAGCCCAAAGAAACGGTCAATTTCTGCGGCCGTGGTTTTCG  
GGCTGTGCGGGCTCACGCTCGATGCCAAAGATTTTTATCGTCGGTAAAAATTTCCACCTCATGACGCGCACGCGAAATACCA  
ACATAAAAAACGTCCTTAGAAGTGGTAAGCGATTTGGTATCTATGTTGAACAACACGCGATCACAGGTAAGCCCTTGGGATTT  
GTGGACGGTGGTTGCATAAGCATAGGAAAGATAAGAAGCCTGTTTTTTGTCCAGCTCAACCGTGCGCCCTTTTTTTGTCTCAA  
GCGTCAGTTTTTACCCTCCACGGTTTTTACCCTGAAGCGGTCGCCGTTGGCAACGTCCAGCGTTTTATCGTTACGCGTTACC  
ATAACCTTATCGCCCGCGCCAGTTCGGCGCTGACTGCCTGGTATACAGACAGCTTGGTGTGTGTACGCGGGCTGAAAGCGA  
TCTGCTCACCGCTGCTGCTTTCAACCGTCAATTTGTTGCCCGGCCGGTATCAAGAACCTGGTAAGACTCGCCCCGCTTCATAC  
CATTTTTGTAATCCTGTTGCGGGATAATGATTTGCCCTTACTGAAATAACGGCTGTGCGGGCGTTCCGCTGTGTCGAATCCA  
CGCGGTCAAGTAGCGTGAACGTTTTGCGCGGTTCCGGCAAGCCCCAGATTGCCCGGATGTAGTCATTGAGGGTTTTGCGTGA  
GGCGTTCGTACCAGAGATTATCAGGGTGGCATCCTGTTGTTCTGAGGACAGAGACAGGTAGCGATCGGCAAGTTGAGCGAG  
TCGGGGCGCTTCTTCTTACGTTTCGTTACGCGGGTGATATTTTTAGGGCGCGCGCGGCATTACCTTCAGCGGCATACTTAA  
CCGCTCAAGCAAACCTTCATTCTTGTGCTGATGTCTTTTTCATGTAGCTGGTCTGCATATCTGCTTAAATCAGCTGCTCAA  
AGGCTTACCGGCTTCTACCGCTTTCGTCTGTGACGTATCCCCAGGAATACCGCGCGAGCGTTATGCTTCTCGATCACCTCCAT  
CAGCTGTTTCATCTGTGCGGGCGGTATAACCCCGCTTCATCAATGAATACGACTGATTTTTTCATCCAGCTTTTTATCCTTCGCT  
TTGAGGAAAGCGGCAACGGTGCGGGCCGGTAATCCATCATCTTCAAGCGTTTTTTCTGTGTCCCATAGGGGGCCAGCGCCG  
TGACCTTCAGCCCTTGTGACTCCAGCAGCTCTTAGCGGCCATCGTCATATAGCTTTTACCGGTACCGGCGTAACCATGTGCGG  
CCACAAACCGATCTTTGCTCGTCACAATTTCTGTAACCGCGCGCATCTGCTCCTTCTGAGGGTTTTCCCGGCAAGCAGCTGG  
CCTGCAATCTCTGCGTCACTGTGCGGCATCTGCCCCGGCCGCGTGATTGATAGTCAGAATGGAACGCTCAAGGCGAA  
TACCCTCCACGGTAGTGACGCGGTGGCTGGTCTTTTTAAGCCTGCCGTTTTTAATACCATCATCTACCGCAAACGGGCTTTAT  
CCGCACGCATCCCGCTATTCGTCAGCGAGTCGATCCACTTTTGCGCGTCAGAGTTTCGGCCATAACTGAAGCACCGACCTTC  
AGAGTTGATTGATACCGGGCTTCGCCCTCGATGATGGCGCCCTTCTGTACCGCCTTCAGGTACGTTTTTCAACATCGGCTATT  
GTGGCATGGCCAGCACCTGCTTATTAGCGATTTGAATCAGCTTCTGGCGTTCAAAGCTGGCATCGCGCTCTGACAGCGACTT  
AACTGCAAACCTGGATAGCCCGGTCAGCTTAACTCCGGGCTGGTAAAATCCGGGGCCATGTTGCGCGCTATATCAGCCTCCA  
GAGGTTTACCGTGTCCCTGCCATTACCGTTATCAAATCAATGCCGAGCGTTTTTGGCGCGGCTGGCCATTCTGGTGAATT  
TCTTACGGGAATGCTCTGTTTTCTTTTACGCGTAGCCATCGAGACGCGGCTTTTCTGTCTGAGCATCGGCGGTTTCCCGCGT  
CAGACCCATTGCAGCGAGTCCCTTTTTCAATTTGCTCCGACCGGCGGGAAAAAGCGCGAATCTGTTTCATCTGAAAAATGGGCC  
ATATCGAACGTGTTATTTTTGCTGTTGTAACGCAGCTCATAACCGGCTTTGGTCAACTCCAACGCCAGCTCCTGTTTGAAACAT  
CGCCAGGTGCATTTTGTACGCATCAGCTCATATTTTTGAGCGCGCGCCACTGGCCGTCCTCGCGCTGGGTCATGTTTCATG  
ACAAAAGCGTGTGTGTGCAAATCAGGATCTAGCGCCCTGGAAGTTTCGTGGCGGAAAGTAGCGACGACAAGGTTATTGGTAT  
TCTGGGTTACTGATTTCCCTGGCGAGTCGTCGGGCCTGCGCGAGTTTTTACGCTTACGCGACAGCAGCGGCAACAGCTTT  
TTCATGAGCCTCGATAATGGTTTTATCGCCGTGTATCAGCGCCTGCATGGATACCCCTTAGGCGCTGAAAACGTCAGGTCGTA  
GCCAGACGCTTTTTTTGGCATACCCACGTGTGCTGCATATGCGTGAAGGTATCTATCTCTCCGACAAGCAGCTCTTTAAA  
CCGGGCTGATTCAACGTCCCCGGATAAGCCGAGGGCTTCAGCTCCGGTTCCTGCCAGGACGTGAATGATGAATCCTTACTGT  
AGTAATCATCCTTTGCATCAGAGTAGTAGCCACAACGCTAGTGACGTTCTGGCGGGTAATCGTGTTATATCAAGCATCAGAT  
CTCCCTCAGTTCAATGCCAGGAACAGGGTTTTTGCATGGTATTTAACGTGTTTAGCCTTGAACCTTAGCGACGGGCATATCACC  
AGGCAACGCCAGATAGCCGGTGAGGTTTGGCAACATTGATATTTGCGTAGGCGTTACGGCACGAACAACTTTAAACGTGCGG  
CGTTTACGGACAATCCAGGGCTTCTGAGGATCGGATTCTTACGCTCAACTTCGCCTTCTATCTACCGAGTGAGCGCGACATT  
TGATCCAACGTTTCATCACCGAGACGGCTGCCGCCAGCACGATGTTAGAACGCATGTTAGCCAGAATTGTCTGAGCCATATC  
CCGACCATAAACCTTAAACAGCTGAGAATAGGTTTTGATAGCCAGCATAAACACACAGACCGCTTTTACGCCCTTTGGTCAGTG  
CATCGTTGAGGTTTGGCAGAACTGGAGTGATTCCAGCTCGTCAATAAATACATTAATGCGGCTTCTTTTTTACCCATAACCA  
GCACGATAGAAAAATCGAATCCAGCCAGCAGGAAATTAGCGGATTAAGTGACCTTTTCATTTCTTCTGCCAGGTGATAAAC  
AGGGTTCCCGGCTTTCCATCATCAAGCCAGTCACGCAGGGAAAAAATTACCTTCCGGCATTTCAAATGTGGGGCAAGATTCTT  
ACTGAGAACAAATCGCGCGCTTCCAACCTGCTTTTTTACAGACCCGAAAAAATAGCTTCGGCAGGCGTCCCATTAATAAATTCTT  
TTAATTTTTTCTGGTCAACGTTACAGGCCAGTGAATAACTTCTTCCATAGTTACTGTGCTGTATAGGCTGTGAAGTTTTTTTTCGA  
AACTTCACTAAAAATAAGACGGCCATAGCCGAACCATTTCTCAGTAGCCATATCAGGGCTTTTCTGAACAATAGAGTTCACTAA  
ACGCTCGTAATCATATGAACGGCGAATTTTCATTGAAAAACACCCAGCCTTCAGTGCGTATTATCATAGGCGTTTAAATAACATC

GCCGGGACGATAGAAATCTTTAAGAACCCCCATTTGGATCTAAAGCAATATTTTTGCCGCCTCTAATGATGCTCTTAAATAAC  
AGTTCATTGAAAATTGTGGTTTTACCAGTACCGGTTGTACCGGCAATCGAAAAATGCAAGTTCTCAGCGTATGTAGGTATGGG  
GATATTAGCCACGGTTAACTGGTTGACACCTCTTTCGCGTGTTTTATCAGCGAGTGTTCTGGCGCGAACAAGCTCTGTACCAC  
GATAAATCTTTTTGAATCTTTCGCCTTTAAACACGCGTGATTTATCATAAATGATAAAAGCGATCAGACCGCCAACACCAATAAA  
CCAGCCAGCAATTAAGCTGACCATAAAGGCCATAGCGAAAAAGTATTCTTAACCAGATACGGAATCAGGTATTTAGCCGTGG  
ATGGATCAATACCGTAGGTAAATTTGCAACTAGAAACCATACCATCACTGGAGGCAAAGTAATTGCAAATAAAAATGCTAAGC  
CTCTTCTCTATCGTCCATTTACAGCGCTCTTTTTTGGTTCCAGACTTTGTAGCCGTTACGTTCAACCTCTGCTTTTTGCCGCTTT  
GGTTTTGCCCGTTCTGCTATCGAGCGCAGGAGGATTAGCGTTTTCAATAGCGAGTGATTCATGCAACATCATCTGCTCTGCCG  
GTGGGAATTTTACGCCAGATAGCGTTTCGGTTATTGCCTTCAGCTCATCGCGCAGTGGGCCAAAATCCGCATCTGAAGCACGG  
TCAAAAAGATAATCCAGTTTTCGATTACGTCTCAGCCGGTCGGCAACTATTTTCAACCCGGACTCCCGATCACCTGGGCC  
AGCTTCAATGCAGCGCCGAGATAATCTGACCGATTACCTCCTGAAACCAGGTCTATATAGGCCAAAAGTTCATCTGATACTTT  
TGCGGTTATTATTGGCATTACAGTCTCACATTGTGCATTTCTTAAACAAAAAATTGGGATCTAACAAGCTGAAATCTTAGTATTA  
CCAAAGTAATAAAGCAAACCTATTATAAAACAATGGGTATTGGGTGTTTTTAATACCTAATTATTACCGAATATTGACGCTATTT  
ATTTTTTATCTTTTAAATCAGTACGATAGCGTGATTTATCGCGCTGCGTTAGGTGTATAGCAGGTTAAGGAAAAAAATCATCT  
TTTTTGGTAGGAGCGACCTCCGTAGGTTAAGGGTCATTTGGCTAAAAAGCGTCCTATTCTTTGATGGTCATGCTTGCATGACCA  
TCTGAGCAACCAAAAACTACAGATAAACTACAGAGAACTACAGATAAACTACAAAAACGATTTACCTTAGCGTTGTCAGAC  
TACTAATAGACTACAAGGAACTACAAAGAACTACAAAGAACTACAAAGAACTACAAATAGACTACTAAAACCGTGGCA  
GACTACTAATAGACTACAAGAACTACAAATAAACTACAAAAGTGGATTGACCCCTTCTTACGAGTGTTGTAGAGTCATCTTC  
ATACAACGGAGGGGTTATGAATAAACCAGCAGATTCTGAAACCCCGCAACTTATCGGCTGCTGTCAGATTGCGCCTAAATGA  
AATCGAGAAGTGGCTGGACAGAGGGCTAACGCGCATGAAATTGCTGAAATCCTCGACAGCGAATACAGCTTTTCGGTAACA  
GCCAAAGGGCTTGAGATGGCACTGTATAGAACGCGGCAAAACCGAAAAATGTATTGCACAATACACATGATAAGAGTAGCG  
CGAAGGGTGCAGCGGAAAGTGTATTGCACAATACACAACCGTCTGAGCCTGAAGCGCAGGAAAGTGA AAAAGCAGAGAGT  
CCCGCATTATTGATAAAGAGTTCTTCAATAAAATCGGTGAGGATTTCAACCCCTAAGAAGTTCAACAAAAAATTCTGAGGTGA  
TTTATGAAAGTAGCGGTAATTAATTACAGTGGCAGTGTTGGTAAAACATTAATTTTATCTTACCTGTTAGCCCCGCGCTGACTG  
GTGCAAAGTTCTATGCGGTAGAGACTATCAACCAGTCTGCTTCCGATCTGGGTATTGAAAATGTGACCAGTTTTAAAGGTGAC  
GACTTCTCACGTTTGATTGAGGATATTGTTTTGAAGATGCAGGCATTATTGATATTGGCGCGTCAAACGTTGAAGCGTTCCTG  
ATGGCTATGTCTCGCTTGACAGTGGCGGAACGAATTTGATAAATATGTAATCCCGGTGACGCCGATAATAAGGCGATTGAT  
GAAAGCCTGAAAACGGCACACACGTTAAGTAAAGCGGGCGTGAGCAGCAAGAAAATTATCTTTGTTCAAACCGTATTAGTC  
CAGACAGTGAAGTAGAAGATGTGCTGGCGCCGGTGTGAGTTTGTCAAAGAAACGAAGATTGGCAAATAAGCAAGAAG  
GCTGTTATTATAACAGTGAGTTTTTGAATATCTGGCGTTTTACCCTATCTCATTGCAAGTATTGACCGCTGAAGATCCAGAA  
GAATTCAAATCCCGTGCAAAACAACAACCGATGCTGACGAGCGCAAAAAACTGGCACGCCGTTATACATACATGAAACAGG  
CGATTCCGGTAAAAGCTAATCTCGATAAAGCATATGCGGCTTAAATGGGAGAATAAAATGGAAAAGCAGCCGGATAAATTAGA  
AGTTCTGATGGACTGGTTTTTAGGTGACGCGAAGGAAATCACCGCAACTCAGAAAGAAATGACGCAGAACTTTCTGAGCTT  
TCGGAAGAGCTGGCAAAGACACCGAAAGTTTAGGAGAGACGGCAGACTCTTTTAAACGGGCTTTAGTAGAAAACAGCG  
TTCAATTAGCCTGGCAATTAGTGATGATGCTAAGGCGCGGAGGAATTTCTAACTAAATTCCGCCGCGCGCAGGCGTCCAGTG  
CTGAGACGTTTACCCGTCAGATCTTTTTATTACAGCTGGCTGCACCATCGTGGGCGCCGAGTAGGCGCCGCGATAGCGATA  
CTTTTACTGAGATAAAGCAAACCGGGCGTGTCCCGTTTTTTTTGTCAAGCGGAGCGCGGAGGCCGAAGGCCGGAGGCATTA  
GTGGCCCGCCCGCGTAAGCGGGGCGAGACGGGAACCGGCTCGAAGCGCAGCACGGCAGAACGGCCCCGAGGGGCA  
ATGCCCGTTTTAATTCATCGTGACAGTCGCGCGTGACCATCACGGGAGAAAAATAATGAATGACCGACAGCGAGAAGTGGC  
CCGTATACGCCAGGCCCGCCGCGCGGCTCAAGGAAGAAGGCACAAGCGTGACAGTACGCTAACAAAACAGGAAG  
AAGCAATGTTGCAGGAGCTGTGCCGGTTCGCCGCTCTGGACGAACGCCTTATTCAACGAACGAATTTTTCCAGCTGCTGCT  
TATCCGCAACTGGCAGCAGTGGCAGGAGCAGAAGGCACAGCTGGGAAAATGCCAGGCTTGC GGAAAGCTGAAAGCGGAG  
GGGGGGTGCAGGGTGAACGGAAAGGCGAAACCTTAACTGCTGGCTTGCCGTCGAAGCCAATGAACTAAATTTGTAGTGT  
ATTGTGCAATACACATTTACACAGAAACA AAAACACCGGCAATTCCTGGAACCGGATACCTACGGCTATTCTGGGTGAACG  
GTACTTTTTGCACCTGGGTGCGCTGAAAAAGCTGAATATGCAGGGTGACGTTTCGCGTGCTGTTCTGCTTTGTAGACTGAATGC  
GCCAGCTATACGCCTGACTGCTTAAACCTGGTAAAGTTCTGCAACCGGCACTGACCGGAAAGCAAGGCAGGGAAGACCTAA

GCCAGAAACCTTGACTGCTCCCCGCCCTTCAGGGCGGGGATTGCGGATCATGTTCTTCTTTTCAGGGATTCAACGCAGACA  
AGAAAGGCTTTCAATTTCTATACGTGAACGGCCGCGCAGCGGAAGAAACAAGCCCGGTCAATCCGGGCTTGTTTCTTTAGG  
CGGCTCAGAAATCGCCTAAAGGCCCGGCTTGGCCGGCAGTCAGTGCTATTTAGTTTGTTCAGCAGCTGGCTTAATTTTGC  
CGCCAGTGCATACGTGATTGAAAAGCGCCTTGCAGGCGCTGATTAGGCAGCTGGTTGAACGCTTCGAGGCAGGCGCGCAG  
CAATAATTCTTTCTGAGATTGACTTCTTTTTTTCAGTTGGGAAGGGGTGGTAACTGTAGTCATGCTTGCTCCTTAGTGAGCCGA  
TATCGGCAATTTTTCGGGTGGCGGTGTTGCCTCCCGATGATTTAATTATCGGTGATTATGCTTTTAAAGTCAATACAGGTACGG  
AATTTATTTACCTGTTTTTATGCCCGTCAGGGCATGGAAGGCGACCGCGCCGGACTCCACCGGACACCGGCCGCAATCGCC  
GGAAACTGCGGGACTGACCGGAGCAACAGGCCAACCCCCCTCCCTGCTAAGCCATAACCCAGCCCGCCGACGCAGCTGC  
CGCACGTCCCCACGGGGTGCAGTGGGCGCCGCGCCTGCGCGCGGGTACGGCGGCCCGCTGCGGGTGCGGCG  
CCGTACTGCGAGTTAGCGGCCCGCGCGGCCGTTACGGGGACACCGCACAGTCACGGCCAGTGCCCGCTGAGCTGC  
ACAATCCACGGATAACACAATAGCGCACTGGCAAAGGATGCCGACGCCTGAAGGGCGTGGGCACCCCGAAGGGGCGGGG  
GGCCGCTTGCGGCCGGGCGAGTCCGGCGCAGGGTGTGGCCTGCCAAGCGGAGCGCGGAGGCCGAAGGCCGAGGCGTT  
AGCGGCCGCTGCCGCGTAAGCGGGGCGAGACGGGAACCGGCTCGATGCGCAGCACAGCAGAGCGACCCCGAAGGGGTA  
ACGCCCGGTGTGGCATCAGGATTTAGTGCAATGGCAGAACATGAGCTGGAGAGATCACCGGCAAGCAGCAGCAAAGGGG  
GGCACAGCCGCCCGATGGCTGTTGCCGATAACCGGCGATTAATTAGAGCGGTGTTTAAATATCCCCGCGTTGCGGGGACTA  
GGTTTCAGCAAGTCATGTTAAATACGTGTCCATCATGTAAACTGAAATCCCCAATAAACAGATCCCGCGCATAGGCTACGATGT  
CAAATATCGGGCTACGGATTCCGGAATATCATTAGTAGACCGCTATCATTAGGTTTCTCTGCAAAAGTTTCTTCGTCCTT  
AGCTTCGCCATATAGGCATCTCTAAACAGGTCGAAATCAGTGCTATTAACAGATCAACAAAGGCCACAAACGCCGCTTCGT  
TACCTTCTCGCGGGCTTGTTTAAAGCCGTTAATAAAATCCAGTTGATATGGCACTCTGACGCCATACCAGACGGAATACCT  
CCAATCTTGAACATAAATTCTGGATCAGCCTCATTTGCGTGTAACTCGCGGCAGCGCTCGTAAACTCCTCTGAGCTATCAA  
AATCGGTCAGATCGAGCCAGGCTCCCGCAATGCTTCCGCGATTGATTTATGGTAAGTGCCAACATAAACAGAAGGGGTGCTA  
ATATCAGTCATGGTGTACTCCTTAAAGCGCCGATAACCGGCAATTTTCGGGCGGCGGTATTGCCTCCCGATGATTTAATTATCGT  
TGATTATGCTTTTAAAGTCAATACAGATACGGAATTTATTTACCTGTTTTTATGCCCGTCAGGGCATGGAAGGCGACCGCGCCG  
GACTCCACCGGACACCGGCCGAAATCGCCGAAACTGCGGGACTGACCGGAGCAACAGGCCAACCCCCCTCCCTGCTAAG  
CCATAACCCAGCCCGCCGACGCAGCTGCCGACGTCCCCACGGGGTGCAGTGGGCGCCGCGCCTGCGCGCGG  
GTACGGCGGCCCGCTGCGGGTGCAGGCGCCGTAAGTGCAGTTAGCGGCCCGCGCGGCCGTTACGGGGGACACCGCA  
CCGTACAGGCCAGCGCCCCGCTGAGCTGCACAATCCACGGATAACACAATAGCGCACTGGCAAAGGATGCCGACGCCTGAA  
GGGCGTTGGCACCCCGAAGGGGCGGGGCGGCCGCTTGCGGCCGGGCGAGTCCGGCGCAGGGTGTGGCCTGCCAAGCGG  
AGCGCGGAGGCCGAAGGCCGAGGCGTTAGCGGCCGCTGCCCGGTAAGCGGGGCGAGACGGGAACCGGCTCGATGCGC  
AGCACAGCAGAGCGGCCCGAAGGGGTAACGCCCTGTGTGGCATCAGGATTTAGCACAAATGTCAGAACATAAACTGGAGAG  
ATCACCGGCAAGCAGCAGCAAAGGGGCGGCACAGCCGCCCGATGGCTGTTACTTGTCTTTGTGCGTAGCACTTTGATTAG  
GCCGTTACGGCCGTAATCAGAGCGGCCAGCGAGGTGATGATTTGCGGTAGGTTTTCGAGGATGGTAGAGGTCATATAGCAC  
CTGTAGAGAAGTTGGCGGGTGTGTTTTCCGACGGCCGACTGTAACCGGGCGAATAAGGCAGGTTGTCAACAGCTTGAGC  
GAAGCGTCTGTTGACAACCTGCCGCGCCCGTTTTCACTGCGGTCATAGGCGGAACGACCCACGCCAACGGAACGGCTTTAT  
GACCGGGCAGCTGAGATACCGGCGAACCTGGCTGGCGGCTGACGCCAGCCGCAAGCGCCAGCGCGGAGGGCAAAGCCC  
GGAGGCCAAGCGGAGCGCGGAGGCCGAAGGCCGAGGCGTTAGCGGCCGCTGCCCGGTAAGCGGGGCGAG  
ACGGGAACCGGCTCGATGCGCAGCACAGCAGAGCGGCCCGAAGGGGTAACGCCCGGAGTCTGCCGCTGTTTATCTCTCGT  
TCCATCTGAAATCGGCGGTAAGGCCATTAAGGGGTCAGTTTATCAGGGAGGCGTTAGCCCCCATGTTGTTAATCATCAGGC  
AATATCGTCTTTGTAGCAGGCATAACCGAAGCTAAGTCTCTGTTTTTATATAGTGGCGGGCAAAGTCCCAGGCATCGTGCCG  
AAGTCTCATAATCTGCCAGGACGATTTGCGGGCTTTGTGCCATTGCTGTACGGAAGAAAGCGGCAGAACAGGGCAGGGG  
TGCGACCAGTCAGTGACGGTGTGAGATCATATCTGCCAGACGCTCCAGGGAGCCGTAACCCAGCTCTGTGCGCAGATTCG  
CCACCATGCGTTGTTTACGCAGTGATGCCAGATAATCAATCTCTTTGGTTATATCAGAATTTAAGCGGGTCTGGTAATCCATGAT  
GTACTCCTTTGCGCGCCGATAACCGCAATTTTGCGGGCGACGGTGTGCTCCCGATGATTTAATTATCGGTGATTATGCCCTC  
AAAGTCAATATAAGTACGGAATATGCATGCATAATTTTATATCTTGCAAAGCGTTCATAGAGTGCCTGAATCGCTTTCTGACAGC  
CTCAATAAAAAAAGGCGGGGATTCCCGCCTTTTTTCTTACAGCTGCTTACGTGGCTTTTTACGCGTCATATAACGGGTATCGC  
GCAGTCTACCGCGTACAAAAAGCACGCCAGCGCGCCGAACCGTACAGAAACGCAAGCGGCTTATTATCGAAGTAGCTGAA



AACCCCTGTCGCCGCACACAGGCCAGAACAGAGACGCAGGCGCAGGTGATCTGCACCAGATCCCTGTATCCCGCACGAAC  
GATAAACAGGGCAGGGCAAGCGCAGCGGCGCTAATAATTAATGCGAGAGGGACAAAAACGAGATAGTGATACATGTGAAC  
TCCTTGATGGTTGCCGATACCGGCGATTGTTCCGGCGGCGGTATTGCCACCCGATGATTTAATTAGAGGTTTTGCGCGTCCAG  
GAGATTGACCTGAGCCGGGTAACGTGAAACTTTTTCCCCTTTATGGATCACGTTATGCGGGGCGCTAATTTCACTACTGATAA  
AGCTAACCGGGTAACGTTTTTTTACCGCAAATCCGCTCGCTAAACCATGCCACTTTTGGCGCTGGCCGATCCACTGGATGAACA  
ATCACACCGGCCATGCTGCAACCCGTTGCGGGTTCGTCCAGCGTAATGCTTACCGGGACTGTATCCCGGTAAAAAACTTAAC  
CGGCGGCACACCTGCCTGCGTAGCGGCTGCGACAACCTGCAAGCCCGATAACCGCTATCCGATTAATAAGCATTTTATTCCCCTT  
ACTCATGCTGATATCACCTTGCCAGCTGTTACCAGTTTACGAAATTCACTTTCATGAATTTACGCCCATGCTCAAGCGTTGAAT  
ACACGTTGCCGATAAGCCAGTTACCAGCCGTTTTTGTCTCGGTATACCACCATGCTTCTGTCAGAGTAAGCAGCGGTTTCGCTAT  
CCTCGCCCTTCTCATAGATCCAGATTTTAGTGACGTCTTACCCGTTTCGTTGCTGCCCTGAATGGTAGGGTCAAAGGTATGTTT  
AATCTCTATATCGAAGTAACGCTGAAGGAAGTTAGTAAAGTGCATGACGACTCCTGTAAGCGCCGATACCGGCAATTTTTCGG  
GTGGCGGTGTCGCTCCCGATGATTTAATTATCGTTGATTATGCTTTTAAAGTCAATACAGGTACGGAATTTATTTACCTGTTTTT  
ATGCCCGTCAGGGCATGGAAGGCGACCCGCGCCGACTCCACCGACACCGGCCGCAAATCGCCGGAAACTGCGGGACTGA  
CCGGAGCAACAGGCCAACCCCTCCCTGCTAAGCCATAACCCAGCCCGCCGACGCAGCTGCCGCACGTCCCCACGGG  
GGTGCGCAGTGGGCGCCGCGCGCCTGCGCGCGGGTACGGCGGCCCGCCTGCGGGTTCGCGGCGCCGTAAGTGCAGTTAGCG  
GCCGCGCGCGCCGGTTACGGGGGACACCCGACCGTACGGCCAGCGCCCCACTGAGCTGCACAATCCACGGATAATGCA  
GGAGACGAATCATGATAGGAGGCTGAAGGGGAAATGAGCGGCAGCAGGGGAAGGGGTTGCCAAGCGGAGCGCGGAGGC  
CGCAGGCCGGAGGCGTCAAGTGGCAGCTGCCCGGTGAGCGGGGCGAGACGCGTAGCGGCTCGATGCGCAGCACAGCAGA  
ACGGCCCCGGAGGGGTGACGTCCGGGGGTTGCTTTTTAAAGATTTTCGACCACATCAGTAAATCGTAGTGACACCATGAAGC  
AAAAGTATCGTGCAGACCAGAATCAACAACAGTAACAGCAGACCTTTTTTTCGACGTAATAAAACCGGCCCAAAGCGCCCG  
CAAGAAGCACACTCAACACGATTTCCGTTATACTAATCGTATTCATAATCTCTCACGTTTCCCTTTTTAGAACTCTGCCACACAC  
AGATAAAACCTTATAACAAGCTACAAAACCCGTTATTCAGACGCGGTAATGCCTAGTTTTTTGCCAGTATTTAGATGACAAA  
GAAACCCCTTATCCACTTCCCGTTACAAGGTGAATGATTGTGGCTTCATGCCCTTAAACAGAGTGGGATATTAAGTACGCTGA  
ATGATATGCGTCTCTCCATCATTTCCCGTACGGCAATTAGGCCCTCTGTAGAACAGGGGTTGATACTACTAATGTTGGCGTTGT  
TTTTCGGTTTTGTTTACGATCGCTGATCCTCAAATATCGGTTTTGTGTTACGTCTGCCGCTTTGCGCTGGATAAGCGACTTAAAGA  
AATCCGACGCCTTCAAGATATCGCTATCCTGGAAGTCGGGAAATGTCGCTTCTGTCAGCTCCTGCGCCGTACCTGCCCGTATAA  
CGTTTTTATCGCGGATCATCGTTGCTTAAACGCCATCAGCCTGTTTTTTGCTGAAGGAGTGCCGAAAATAATCGCGTATTGG  
CCGCCGCTATCCTGATGAACAGAAGTATCCAGCGATGATTACCCTGTTTACGATAGTGGTGATAGATTTGCTGGCCGTAGCGC  
TCCTGATCGGAATTACGGTAATCGAACATTAACAGTTCCAAAAGCATTAAACCGATCTGGCAATTGCCAGGCGGTAGGGTGTG  
AAGTGTGCTAACATAGTTTTCCCTGAGCGTGACAGTACGATAAGGCGGGCTTTGCCCGCTGTTATCAGTTAATCAATGG  
CACGATAAATACGATTCTGGCTTTTCGTTCTCCAGCGTATTAACGTACTCCCGCAACAGGTGATAACCGTTAGCCATCGTTTCGTT  
CAGTTCCGCTTTGCCTTCTTCATATGCCAGGCCGCAAAGTAAGTGTAGGCATACAGACAAACAATAATCCCTACTTTCGCGCGC  
GCTGCATTACCTTCAAATAGTTAGGTAACGAGAGCCAAAGAGGTTGGGGCGCTTCCATAAAAAACGTGCCATTGCTGGCC  
TGAAGGTATTCCCAATACCCTCCCTGGTAGTCTTTAGCGTAACGATTCAGAAAGGACTGAATGAAGTATGCTGCGCTGAAGAA  
AGCGCCACGAAATGCCGACGATGAAGTTCATGCGGGCGTTTTTACGAAATGTAGCGGGCGGTGATTTGATAGTTTCCATG  
ATACTTCTCTTAAAGCCGATACCGGCGATGGTTAAGCGGCAGGCACATCACCTGCCACTTTTTAATTATCGTACAATGGGGCG  
TTAAAGTCAATATAAGTACGGATTATTTACCTAATTTTATGCCCGTCAGAGCATGGAAGGCGACCTCGCCGGACTCCACCGG  
ACACCGGGGGCAAATCGCCGGAAACTGCGGGACTGACCGGAGCGACAGGCCACCCCCCTCCCTGCTAGCCCGCCGCCAC  
GCGGCCGTTACAGGGGACACTGAGAAACAGAAAGCCAAACAACACTATATATAGCGTTCGTTGGCAGCTGAAGCAGCACT  
ACATATAGTAGAGTACCTGTAAAACCTGCCAACCTGACCATAACAGCGATACTGTATAAGTAAACAGTGATTTGGAAGATCGCT  
ATGAAGGTCGATATTTTTGAAAGCTCCGGCGCCAGCCGGGTACACAGCATCCCTTTTTATCTGCAAAGAATTTCTGCGGGGTT  
CCCCAGCCCGGCCAGGGCTATGAAAAGCAGGAGTTAAACCTGCATGAGTATTGTGTTTCGTCACCCTTACGCAACTTACTTCC  
TACGGGTTTCTGGCTCGTCAATGGAAGATGGCCGCATCCATGATGGTGACGTAAGTGTGGATCGCTCGCTGACGGCCAG  
CCACGGCTCAATCGTAGTCGCTGCATCCATAATGAATTTACCGTGAAGCGGCTACTGCTGAGGCCAGACCCTGCCTGATGC  
CGATGAACAAAGATTTTCTGTGTAATGACCCGGATAATGAGAGCGTTGAAATCTGGGGAGTGGTTACGCATTCCCTT  
ATCGAGCATCCGGTATGTTTGCCTGATTGATGTCAATGGCATGTACGCCAGCTGTGAGCAGGCATTTAGGCCAGATCTGGCA

AACCGAGCAGTGGCCGTTTTATCCAACAATGACGGCAACATTGTGGCCCGTAATTACCTGGCGAAGAAAGCGGGCCTGAAA  
ATGGGCGATCCGTACTTCAAAGTCAGACCCATAATCGAGCGTCATAACATCGCTATTTTTAGCTCTAATTACACTCTCTATGCCTC  
CATGTCCGGCCCGTTTCGCGGCCGTAGTTGAGTCCCTTGCAAGCCACGTGCAACAGTATTCAATCGACGAGCTTTTTGTTGACT  
GCAAAGGGATAACGGCCGCCATGAGCCTTGACGCTTTCGGGGCGCCAACTGCGCGAGGAAGTCAGGCGACACACAACGCTG  
GTATGCGGGGTCGGTATTGCCCGTACTAAGACGCTGGCGAAGCTGTGTAACCACGCTGCAAAAACATGGCCCGCTACTGGCG  
GGGTGTTGCTCTGGACGATGGCGCCAGACTGAAGAAATTAATGAGCATCCTGCCGGTTGCGGAAGTCTGGGGCGTCGGCC  
ATCGTACAGAGAAAGCACTCGCCACAATGGGGATCAAACGGTGCTGGATTTAGCCAGGGCAGATAACGCGCCTAATCCGTAA  
AACATTCGGCGTTGTGCTTGAAGAACGGTACGGGAGTTGCGCGGCGAGGCTTGCTTCAGCCTGGAAGAAAACCCCTCCTGC  
GAAGCAGCAGATTGTTGTGTCGCGCTCATTGGCCAACGCGTAGAAACCCTGACGGACATGCAGCAGGCTGTCACCGGATTT  
GCAGCGCGCGCAGCTGAAAACTGCGTAATGAGAGGCAATACTGCCGCGTCATAAGCGTCTTTATCCGTACCAGTCCTTATTC  
AGTGCCTGATACACAGTATGCCAATCAGGCAACCGAAAACTGACGGTGGCAACCCAGGACAGCCGCACGATAATTCAGGC  
AGCACAAGCCGCGCTGGCGCGGATCTGGCGGGAAGATATTGCGTATGCAAAAGCAGGGGTCATGCTGGCAGATTTTAGCGG  
GAAGGAGGCCAGCTTGATTTATTCGACTCTGCTACGCCCTTCAGCTGGCAGCGAGGCTTTAATGGCTGTTCTTGATGGTATAA  
ACCGGCGTGGAAGAGCCAGCTTTTTTTTTGACGGCCAGGGCATCGATAACTCCTTTGCCATGCGTCGTCAGATGTTGTCACCT  
GATTACACGACAGACTGGCGCTCAATACCAATAGCCACCATCAAATAATTACCGGCGCCGTACACGTGCCGGTTAACCCCTCA  
ACCGGCCGAAACAAGTTTCGGCACGTTTTCGCGGTTTTCGGTAAAAGCCGTTTCCTCTGTATAAAAGATCAGCTAAATTATGT  
GTATTGCACAATACATATATGTGAGTTAGCAGTGAATTTGCCTACGCCGAAACCTACGATGAACTTCAGAGAGCCTACGATT  
TTTTCAATGATAAGCTATTCAGCAACGAGCTGCCGCCATGCCTGATAACGTTGCAGCGTGAGAAGCGAACGTATGGCTATTGT  
TCCTTTAAGCGTTTTCGTCGGCCGTGAGAGTGGGTACACGGTAGACGAGATCGCTATGAATCCGGTGATTTTCTCGATCAGAAC  
CATAAAGGCCACGCTTCAACACTGGTGCATGAGATGGTTCATCAGTGGCAATTCCATTTTGCGGAGCCTGGCCGCCGTGGCT  
ATCACAACAAACAGTGGGCGGCCCGGATGGAACGGGTAGGACTAATGCCTTCTGATACCGGCGAACCGGGAGGCAGGAAA  
GTGGGCCAGAGCATGACCCATTATATTATTGCCGGTGGCCCTTTCGATATGGCCTGTGATGAACTGCTGACAGGCCATTTCCGG  
CTTTCCTGGATGGACAGGTTTCCGCCTTACCAGCCTAAGCCTGGCGCTGTGCTAAGCCCTACAGGAAAAGGCTATATTGACGA  
CGAGGAAGATGATAGCGAACACGAACAGGAGGTGGAGGAAGGGCGCGACCCGGTTGAACTCGACGACGAGATCATAGAG  
GCCATGCGATTTGTAACCCACCGCCTGAAGCACCGGTGAACAAAACAACCGGGAAAAGTAGCTGCCCGGTGTGTCATATC  
AATCTCTGGGGTAAACCGGGGATAGTGGTTTACTGTGGTGGCGAGCACTGTAATAAAGCCGCTTAGTAATCTTAAAATAAAG  
TCCTTTCGGACTTTATTTTTTTTCCATTTCCGAGGTCGTGATGTTATTAATGCTGTACTTCGCGGCTTCTTTTAAAACAGTTTCAG  
CAAGGCTTGCTGGTATCCAGACCTGAACTAATTTAATGGTTCCGCCGTTCTCGGCTTTAAGAGTGGTGTCTGGTACAAATCCC  
AGATTGCTTAACGGTGCTGGAATGTTTTGCTTGGAACGGCCTACTCGCATGGCTACGTCTGATGATTTCTCACCTTTGACAA  
GCACGGAATAGCCAATATCTGTTGTGATGTGTGCAAAGGAAGCCATTTGCGGCAGCAGCTGTTTCCATTCTGTTTCTGAAATT  
CTGTTTTTCTGAGCCATCTGTGGCGCCTCCGTAGTTTTGTTTACAGAAAGGATATACTCAGAATAAACAGGGGTCAATACAAG  
TACGATTTTTATAAACTTTATTTTATTTGAGGGTGGAGGCCCGGTGCGGCAGCAGCGCGGGCCTCGATGGTGGCGGAAGGTG  
CTGGCGCCATGCTCGGATTAACATCAACCGTGAAGAACTGCGAACTTGTTCGCGGTTCTGAGGGGTTGACCGAGCCG  
CGAAGCGGCGCTGGTAAGCGATGATATGCACATATCCACAGGCATATTTTTAAAGGTATTTTATAGATTTTTTATCTTTTTAAAG  
TCTTTTAGAGCTATATAACTCATTGATTTAAAATCATAAATAAGTGTATCTCTGGGAATCCGCCACCTTGTTATGGGAATTGGC  
CCACCTTACTATGGGAAACAGCCACCTTACTATGGGAATTAGCCACCTTGTTATG
